# Supplementary material for: Hierarchically heterogeneous interface structuring strategy for microenvironment-regulating and self-decontaminating biodegradable meta-membranes
Source: Research Square preprint supplement (doi:10.21203/rs.3.rs-7509740/v1), 2026-01-06
Supplement: Supplementary file 1 [file 37651b539db51c76af942ef9.xlsx]

## Sheet: Fig. 4a
x-axis	y-axis-Surface Potential (kV)	y-axis error	y-axis-Surface Potential (kV)	y-axis error
	0 Day		90 Day
P-PLA	3.3	0.2	2.6	0.3
MRSD-PLA2	5.3	0.3	4.5	0.2
MRSD-PLA4	5.5	0.3	4.9	0.3
MRSD-PLA6	5.8	0.2	5.2	0.3

## Sheet: Fig. 4b
x-axis-Frequency (Hz)	y-axis-Dielectric Constant
	P-PLA	MRSD-PLA2	MRSD-PLA4	MRSD-PLA6
100	1.4015	1.4437	1.5065	1.7244
102.33	1.4041	1.4398	1.5056	1.7202
104.71	1.4032	1.4412	1.5089	1.7226
107.15	1.4033	1.4401	1.5078	1.7285
109.65	1.4044	1.44	1.5069	1.7242
112.2	1.4045	1.4436	1.5053	1.7272
114.82	1.4055	1.4437	1.5036	1.7286
117.49	1.4026	1.4433	1.5052	1.7256
120.23	1.4078	1.4447	1.5093	1.7294
123.03	1.4058	1.4445	1.5022	1.7201
125.89	1.4044	1.4451	1.5007	1.7254
128.82	1.4063	1.4441	1.4908	1.726
131.83	1.4073	1.4467	1.4962	1.7249
134.9	1.3998	1.4411	1.4964	1.7392
138.04	1.4015	1.4409	1.4913	1.7311
141.25	1.4051	1.4446	1.4955	1.7302
144.54	1.4042	1.4446	1.493	1.7396
147.91	1.4103	1.4458	1.4905	1.7261
151.36	1.4058	1.4422	1.4923	1.7228
154.88	1.4038	1.4441	1.4982	1.7302
158.49	1.4101	1.4393	1.4913	1.733
162.18	1.4048	1.4456	1.494	1.7363
165.96	1.4044	1.4426	1.4973	1.7309
169.82	1.4037	1.4452	1.4992	1.7219
173.78	1.4065	1.4452	1.4937	1.733
177.83	1.4047	1.443	1.4941	1.7345
181.97	1.4019	1.443	1.4917	1.7366
186.21	1.4027	1.444	1.4912	1.7305
190.55	1.4033	1.4442	1.4988	1.7362
194.98	1.4043	1.4437	1.4914	1.7331
199.53	1.4067	1.4429	1.4959	1.7318
204.17	1.4038	1.4427	1.4901	1.7306
208.93	1.4033	1.4422	1.493	1.7329
213.8	1.4026	1.4439	1.4985	1.7294
218.78	1.404	1.4425	1.4936	1.7295
223.87	1.4038	1.4433	1.4984	1.7313
229.09	1.403	1.4422	1.4992	1.7311
234.42	1.4037	1.4426	1.4995	1.7284
239.88	1.4036	1.4443	1.4997	1.7285
245.47	1.3989	1.4389	1.496	1.7342
251.19	1.3956	1.4391	1.4936	1.7372
257.04	1.4026	1.4411	1.4905	1.7365
263.03	1.4021	1.4408	1.4958	1.7351
269.15	1.4024	1.4417	1.4946	1.73
275.42	1.402	1.4409	1.4988	1.732
281.84	1.4011	1.441	1.4998	1.7295
288.4	1.4019	1.4408	1.4991	1.7299
295.12	1.4015	1.4404	1.4935	1.7285
302	1.4015	1.4405	1.4983	1.7282
309.03	1.4017	1.4405	1.4972	1.7264
316.23	1.401	1.4405	1.4906	1.7288
323.59	1.4013	1.4402	1.491	1.7276
331.13	1.4016	1.4404	1.4905	1.7271
338.84	1.4004	1.44	1.4925	1.7278
346.74	1.4031	1.4382	1.4936	1.7373
354.81	1.4007	1.4393	1.494	1.727
363.08	1.4009	1.4399	1.4989	1.7278
371.54	1.401	1.4399	1.4958	1.7257
380.19	1.4006	1.4397	1.4998	1.7275
389.05	1.4006	1.4397	1.4957	1.727
398.11	1.4011	1.4393	1.4966	1.7292
407.38	1.4001	1.4398	1.4956	1.7282
416.87	1.4005	1.4393	1.4967	1.7268
426.58	1.4009	1.4395	1.498	1.7255
436.52	1.4005	1.4391	1.4906	1.7261
446.68	1.3987	1.4394	1.4971	1.7366
457.09	1.3997	1.4373	1.495	1.7238
467.74	1.3998	1.4382	1.4992	1.7267
478.63	1.3991	1.4384	1.4971	1.7261
489.78	1.3988	1.4381	1.4955	1.7254
501.19	1.4005	1.4379	1.491	1.7263
512.86	1.3992	1.4382	1.4922	1.7257
524.81	1.399	1.4375	1.4952	1.7263
537.03	1.3984	1.4378	1.4937	1.7312
549.54	1.3983	1.4406	1.4939	1.7245
562.34	1.3992	1.4383	1.4999	1.7263
575.44	1.3982	1.4384	1.4942	1.7248
588.84	1.3988	1.4376	1.4936	1.7271
602.56	1.3981	1.4375	1.4951	1.726
616.6	1.3984	1.4373	1.4907	1.7255
630.96	1.3981	1.4376	1.4931	1.7258
645.65	1.3991	1.4381	1.4928	1.7244
660.69	1.3988	1.4378	1.4912	1.7241
676.08	1.3984	1.4375	1.4944	1.7282
691.83	1.3982	1.4372	1.496	1.7263
707.95	1.3979	1.4372	1.4966	1.7271
724.44	1.3979	1.4368	1.4947	1.7266
741.31	1.3975	1.4365	1.4993	1.7266
758.58	1.3973	1.4364	1.497	1.7251
776.25	1.3974	1.4365	1.4958	1.7255
794.33	1.3966	1.4361	1.4933	1.7256
812.83	1.3971	1.4358	1.4989	1.7266
831.76	1.3969	1.4359	1.4975	1.7253
851.14	1.3971	1.4362	1.4958	1.7275
870.96	1.3968	1.4355	1.4999	1.7261
891.25	1.3966	1.4358	1.4909	1.7268
912.01	1.3963	1.4352	1.4999	1.7264
933.25	1.3964	1.435	1.4973	1.7263
954.99	1.3958	1.4359	1.4942	1.7243
977.24	1.3957	1.4349	1.4926	1.7252
1000	1.3956	1.4349	1.4966	1.7254
1023.29	1.3948	1.4346	1.496	1.7237
1047.13	1.3944	1.4345	1.4911	1.728
1071.52	1.3953	1.4348	1.4926	1.7237
1096.48	1.3947	1.4335	1.4981	1.7255
1122.02	1.396	1.4346	1.4912	1.7246
1148.15	1.3945	1.4345	1.4921	1.7234
1174.9	1.3937	1.4332	1.4962	1.7239
1202.26	1.3927	1.433	1.4981	1.7243
1230.27	1.3936	1.4334	1.4919	1.7253
1258.93	1.3935	1.4335	1.4951	1.7229
1288.25	1.3937	1.4331	1.4912	1.7244
1318.26	1.3937	1.4336	1.4975	1.723
1348.96	1.3925	1.4337	1.4935	1.7222
1380.38	1.3935	1.4329	1.4907	1.7237
1412.54	1.3927	1.4326	1.4874	1.7217
1445.44	1.3926	1.4326	1.4927	1.7232
1479.11	1.393	1.433	1.4922	1.7252
1513.56	1.3918	1.4324	1.4907	1.7242
1548.82	1.3917	1.4324	1.4885	1.7231
1584.89	1.3916	1.432	1.4859	1.7219
1621.81	1.3914	1.4325	1.4871	1.7233
1659.59	1.3904	1.4319	1.4861	1.7226
1698.24	1.3915	1.4315	1.4879	1.7221
1737.8	1.3909	1.4312	1.4858	1.7219
1778.28	1.391	1.4308	1.4821	1.7228
1819.7	1.3912	1.4298	1.4867	1.7232
1862.09	1.3897	1.4313	1.4895	1.7215
1905.46	1.3907	1.4302	1.4905	1.7205
1949.84	1.39	1.4302	1.4925	1.7221
1995.26	1.3903	1.4306	1.4872	1.7218
2041.74	1.3898	1.4301	1.4896	1.721
2089.3	1.3903	1.4302	1.4878	1.7209
2137.96	1.3896	1.4299	1.4864	1.7205
2187.76	1.3896	1.4295	1.4869	1.7203
2238.72	1.3889	1.4295	1.4884	1.7205
2290.87	1.3892	1.4293	1.4871	1.7214
2344.23	1.3892	1.429	1.4881	1.7217
2398.83	1.3894	1.4284	1.4881	1.721
2454.71	1.3891	1.4288	1.4847	1.7213
2511.89	1.3881	1.4287	1.4812	1.721
2570.4	1.3883	1.4283	1.489	1.7208
2630.27	1.3879	1.4277	1.4856	1.7207
2691.53	1.3882	1.4276	1.4871	1.7198
2754.23	1.3872	1.4278	1.4863	1.7201
2818.38	1.3874	1.4274	1.489	1.7197
2884.03	1.3879	1.4272	1.4852	1.7191
2951.21	1.3872	1.4269	1.4861	1.7191
3019.95	1.387	1.4263	1.4844	1.7192
3090.3	1.3865	1.427	1.4851	1.7193
3162.28	1.3865	1.4267	1.4841	1.7205
3235.94	1.3859	1.4256	1.4856	1.7192
3311.31	1.3858	1.4262	1.4843	1.7196
3388.44	1.3862	1.4259	1.485	1.7188
3467.37	1.3851	1.4253	1.4854	1.7182
3548.13	1.3858	1.4255	1.4831	1.7186
3630.78	1.3845	1.4251	1.484	1.7169
3715.35	1.3851	1.4247	1.4844	1.7183
3801.89	1.3851	1.4246	1.4844	1.7183
3890.45	1.3839	1.4248	1.4842	1.7169
3981.07	1.3841	1.4251	1.4832	1.7175
4073.8	1.3849	1.4249	1.4841	1.7179
4168.69	1.3838	1.4244	1.4817	1.7173
4265.8	1.3837	1.4241	1.4833	1.717
4365.16	1.3832	1.424	1.4839	1.717
4466.84	1.3831	1.4232	1.4825	1.7165
4570.88	1.3826	1.4238	1.4806	1.7166
4677.35	1.3831	1.4235	1.4823	1.7164
4786.3	1.3829	1.4229	1.4821	1.7165
4897.79	1.3829	1.4228	1.4815	1.7151
5011.87	1.3823	1.4223	1.4808	1.7153
5128.61	1.382	1.4224	1.4806	1.7161
5248.07	1.3817	1.4221	1.4803	1.7157
5370.32	1.3814	1.422	1.4808	1.7155
5495.41	1.3819	1.4221	1.4808	1.7157
5623.41	1.3815	1.4217	1.4809	1.7154
5754.4	1.3809	1.4219	1.4803	1.7152
5888.44	1.3808	1.4213	1.4798	1.715
6025.6	1.3809	1.4212	1.4797	1.7155
6165.95	1.3799	1.4207	1.4806	1.7154
6309.57	1.3801	1.4212	1.4799	1.7149
6456.54	1.3802	1.4207	1.4795	1.7141
6606.93	1.3796	1.4204	1.4785	1.7143
6760.83	1.3795	1.4201	1.4796	1.7146
6918.31	1.3794	1.4199	1.4701	1.7141
7079.46	1.3785	1.42	1.4774	1.7138
7244.36	1.3785	1.4192	1.4777	1.7133
7413.1	1.3786	1.4191	1.4772	1.7131
7585.78	1.3789	1.4184	1.4779	1.713
7762.47	1.3781	1.4186	1.4778	1.7124
7943.28	1.3775	1.4183	1.4774	1.7124
8128.31	1.3773	1.4179	1.4766	1.7131
8317.64	1.3778	1.4186	1.477	1.7128
8511.38	1.3771	1.418	1.4766	1.7124
8709.64	1.3768	1.4178	1.4769	1.7119
8912.51	1.3771	1.4174	1.476	1.7121
9120.11	1.3766	1.4175	1.476	1.7127
9332.54	1.3768	1.4172	1.4765	1.7117
9549.93	1.3766	1.4169	1.4759	1.7114
9772.37	1.3762	1.4169	1.4757	1.7121
10000	1.3763	1.4168	1.4755	1.7116
10232.9	1.376	1.4172	1.4745	1.7115
10471.3	1.3754	1.4168	1.4752	1.7115
10715.2	1.3754	1.416	1.4747	1.7115
10964.8	1.3749	1.4158	1.4759	1.7111
11220.2	1.3747	1.4153	1.4741	1.7113
11481.5	1.3747	1.4148	1.4742	1.71
11749	1.3744	1.4145	1.4743	1.7097
12022.6	1.3744	1.4144	1.4735	1.7101
12302.7	1.3738	1.415	1.4747	1.7097
12589.2	1.3735	1.4145	1.4738	1.7099
12882.5	1.373	1.414	1.4734	1.7094
13182.6	1.3733	1.4139	1.4725	1.7095
13489.6	1.3723	1.4135	1.4722	1.7092
13803.8	1.3724	1.4136	1.4726	1.7091
14125.4	1.3725	1.4132	1.4732	1.7091
14454.4	1.3718	1.4137	1.4718	1.7085
14791.1	1.3718	1.413	1.4719	1.7087
15135.6	1.3719	1.4121	1.4717	1.7083
15488.2	1.3716	1.4119	1.4715	1.7076
15848.9	1.3714	1.4119	1.4707	1.7074
16218.1	1.3708	1.4119	1.4709	1.7072
16595.9	1.3704	1.4114	1.4706	1.707
16982.4	1.37	1.4113	1.4708	1.7071
17378	1.3703	1.4107	1.4696	1.707
17782.8	1.3703	1.4102	1.4709	1.7069
18197	1.3695	1.4101	1.4706	1.7069
18620.9	1.3689	1.41	1.4704	1.706
19054.6	1.3685	1.4095	1.4683	1.7053
19498.5	1.3688	1.4093	1.4698	1.7054
19952.6	1.3683	1.4091	1.4716	1.7053
20417.4	1.3684	1.4088	1.4705	1.7057
20893	1.3679	1.4088	1.4692	1.705
21379.6	1.3677	1.4085	1.4691	1.7049
21877.6	1.3674	1.4083	1.4684	1.7047
22387.2	1.3674	1.4081	1.4678	1.7043
22908.7	1.3668	1.4077	1.4679	1.7042
23442.3	1.3671	1.4073	1.4668	1.7036
23988.3	1.3665	1.4069	1.4669	1.704
24547.1	1.3661	1.407	1.4665	1.7037
25118.9	1.3658	1.4068	1.4664	1.7037
25704	1.3662	1.4069	1.4662	1.7034
26302.7	1.3659	1.4066	1.4657	1.7032
26915.3	1.365	1.406	1.465	1.7032
27542.3	1.3647	1.4061	1.4649	1.7027
28183.8	1.3642	1.4059	1.4643	1.7015
28840.3	1.3641	1.4057	1.4641	1.7018
29512.1	1.3641	1.4051	1.4644	1.7018
30199.5	1.3633	1.4051	1.464	1.7013
30903	1.363	1.4045	1.4633	1.7014
31622.8	1.3629	1.4046	1.4631	1.7008
32359.4	1.3628	1.4041	1.4627	1.7005
33113.1	1.3625	1.4042	1.463	1.701
33884.4	1.3625	1.4036	1.4626	1.7
34673.7	1.3622	1.4031	1.4625	1.6995
35481.3	1.3621	1.4029	1.4619	1.6996
36307.8	1.3613	1.4027	1.4615	1.6989
37153.5	1.3607	1.4021	1.4619	1.6986
38018.9	1.3607	1.4018	1.4616	1.698
38904.5	1.36	1.4015	1.4601	1.6981
39810.7	1.3597	1.4009	1.46	1.6981
40738	1.3596	1.401	1.46	1.6975
41686.9	1.3594	1.4006	1.4591	1.6969
42657.9	1.359	1.4	1.4594	1.6972
43651.6	1.3587	1.3999	1.4587	1.6966
44668.4	1.3587	1.3997	1.4591	1.6967
45708.8	1.3584	1.3994	1.459	1.6964
46773.5	1.3573	1.3991	1.4578	1.6963
47863	1.3576	1.3985	1.4581	1.696
48977.9	1.3565	1.3986	1.457	1.6952
50118.7	1.358	1.3985	1.457	1.6953
51286.1	1.3562	1.3978	1.4556	1.6935
52480.8	1.356	1.3959	1.4559	1.693
53703.2	1.3527	1.398	1.4521	1.6939
54954.1	1.3557	1.3962	1.4546	1.6942
56234.1	1.3553	1.3951	1.4564	1.6941
57544	1.3557	1.3965	1.4565	1.6943
58884.4	1.356	1.3956	1.4544	1.6923
60256	1.3554	1.3965	1.4532	1.6925
61659.5	1.3546	1.3966	1.4537	1.6952
63095.7	1.3558	1.3971	1.4508	1.6941
64565.4	1.3556	1.3962	1.456	1.6965
66069.3	1.3543	1.3959	1.4541	1.6916
67608.3	1.3545	1.3959	1.4597	1.6938
69183.1	1.3522	1.3944	1.4521	1.6931
70794.6	1.3526	1.3942	1.4555	1.6927
72443.6	1.3541	1.3935	1.4545	1.6918
74131	1.3531	1.3932	1.4535	1.6926
75857.8	1.3527	1.3932	1.4515	1.691
77624.7	1.3539	1.3937	1.4498	1.6897
79432.8	1.3502	1.3917	1.4519	1.6896
81283.1	1.351	1.3908	1.4514	1.6887
83176.4	1.3495	1.3915	1.4511	1.6899
85113.8	1.3499	1.3911	1.4511	1.688
87096.4	1.3503	1.3909	1.4503	1.689
89125.1	1.3502	1.3906	1.4493	1.6895
91201.1	1.3489	1.3906	1.449	1.6878
93325.4	1.3493	1.3881	1.4485	1.6878
95499.3	1.3476	1.3885	1.4479	1.6879
97723.7	1.3483	1.3886	1.448	1.6858
100000	1.3461	1.3875	1.4478	1.6872
102329	1.3471	1.3882	1.4477	1.6868
104713	1.3468	1.3882	1.4463	1.6857
107152	1.347	1.387	1.4448	1.6862
109648	1.3456	1.3864	1.4457	1.6854
112202	1.346	1.3874	1.4464	1.6861
114815	1.3458	1.3873	1.445	1.6854
117490	1.3459	1.3861	1.4455	1.6856
120226	1.3433	1.3848	1.4436	1.683
123027	1.3431	1.3842	1.4426	1.6837
125893	1.3439	1.3858	1.444	1.6827
128825	1.3433	1.3859	1.4437	1.6829
131826	1.3441	1.3851	1.4427	1.682
134896	1.343	1.3839	1.4434	1.6831
138038	1.344	1.3837	1.4423	1.6812
141254	1.3424	1.3836	1.443	1.6816
144544	1.3407	1.3838	1.4419	1.6822
147911	1.3417	1.3829	1.442	1.6813
151356	1.3413	1.3832	1.4411	1.6815
154882	1.3415	1.3811	1.4409	1.6805
158489	1.3414	1.3822	1.4408	1.6806
162181	1.3413	1.3825	1.4414	1.6794
165959	1.341	1.3816	1.4407	1.6789
169824	1.3399	1.3818	1.4418	1.6799
173780	1.3401	1.3811	1.4404	1.6797
177828	1.3404	1.3817	1.4403	1.6795
181970	1.3403	1.3804	1.4405	1.6794
186209	1.3392	1.3809	1.4414	1.6782
190546	1.3401	1.3819	1.4405	1.6789
194984	1.3403	1.3812	1.4394	1.6797
199526	1.3411	1.381	1.4408	1.6782
204174	1.3418	1.3808	1.4401	1.6776
208930	1.3415	1.3826	1.4407	1.6794
213796	1.3415	1.3816	1.4403	1.6795
218776	1.3423	1.3822	1.4419	1.6798
223872	1.3419	1.3829	1.4416	1.6801
229087	1.3422	1.3839	1.443	1.6787
234423	1.3433	1.3829	1.4423	1.6801
239883	1.3439	1.3833	1.4424	1.6796
245471	1.3452	1.3831	1.4434	1.6804
251189	1.3441	1.3845	1.4446	1.6802
257040	1.3461	1.3845	1.4448	1.6809
263027	1.3457	1.3847	1.4445	1.6813
269153	1.3459	1.3851	1.4453	1.6819
275423	1.3467	1.3869	1.4455	1.6826
281838	1.3478	1.3865	1.446	1.6821
288403	1.3478	1.3854	1.4468	1.6814
295121	1.3466	1.3872	1.4472	1.682
301995	1.3493	1.3862	1.4461	1.6824
309030	1.3428	1.3868	1.4461	1.681
316228	1.3485	1.3858	1.4457	1.6813
323594	1.3491	1.3861	1.4476	1.6817
331131	1.3477	1.3852	1.4457	1.6819
338844	1.3507	1.3858	1.4461	1.6813
346737	1.3483	1.3847	1.4454	1.6819
354813	1.3472	1.3841	1.4442	1.6797
363078	1.3457	1.3831	1.4422	1.6795
371535	1.346	1.384	1.4427	1.68
380189	1.344	1.3822	1.4434	1.6789
389045	1.3441	1.3818	1.4418	1.6778
398107	1.3437	1.3814	1.4408	1.6758
407380	1.3422	1.3768	1.4397	1.6765
416869	1.341	1.3784	1.4384	1.677
426580	1.3394	1.3791	1.4372	1.675
436516	1.3372	1.3773	1.4373	1.6738
446684	1.3371	1.375	1.4357	1.6722
457088	1.337	1.3749	1.4344	1.6703
467735	1.3348	1.3732	1.4329	1.6697
478630	1.3335	1.3732	1.4319	1.6692
489779	1.33	1.3714	1.4311	1.6674
501187	1.3376	1.3746	1.4283	1.6747
512861	1.3288	1.3677	1.427	1.6649
524807	1.3262	1.3675	1.4251	1.6629
537032	1.3266	1.3652	1.4237	1.6605
549541	1.3227	1.3632	1.4223	1.6606
562341	1.3205	1.3617	1.4206	1.6583
575440	1.3198	1.3606	1.4255	1.656
588844	1.3172	1.3595	1.4277	1.655
602560	1.3149	1.3564	1.4159	1.6546
616595	1.3133	1.3541	1.4138	1.6511
630957	1.3096	1.3531	1.4111	1.649
645654	1.3082	1.3517	1.4097	1.6474
660693	1.3065	1.3488	1.4071	1.6445
676083	1.3037	1.3471	1.4054	1.6436
691831	1.3017	1.3451	1.4041	1.6418
707946	1.2996	1.3446	1.402	1.6392
724436	1.299	1.3426	1.4055	1.6369
741310	1.2965	1.3414	1.4001	1.6359
758578	1.2957	1.3404	1.3978	1.6318
776247	1.2964	1.3403	1.4002	1.6315
794328	1.2987	1.3412	1.4024	1.633
812831	1.291	1.3447	1.4053	1.6337
831764	1.307	1.346	1.4118	1.6356
851138	1.3155	1.3558	1.4194	1.6402
870964	1.3281	1.3656	1.4306	1.6477
891251	1.342	1.3761	1.4415	1.6577
912011	1.3591	1.3897	1.4568	1.6648
933254	1.3799	1.4049	1.4699	1.6858
954993	1.3964	1.4204	1.4864	1.7026
977237	1.4139	1.453	1.5012	1.7175
1000000	1.4276	1.4455	1.5114	1.7327

## Sheet: Fig. 4c
curve graph		point diagram
x-axis-Relative Dielectric Constant	y-axis-Surface Potential (kV)	x-axis-Relative Dielectric Constant	y-axis-Surface Potential (kV)	y-axis error
1.39	3.63337	1.39	3.3	0.2
1.39099	3.66158	1.43	5.3	0.3
1.39132	3.67095	1.49	5.5	0.3
1.39165	3.68031	1.72	5.8	0.2
1.39198	3.68965
1.39231	3.69898
1.39264	3.7083
1.39297	3.7176
1.3933	3.72688
1.39363	3.73615
1.39396	3.74541
1.39429	3.75465
1.39462	3.76388
1.39495	3.77309
1.39529	3.78229
1.39562	3.79147
1.39595	3.80064
1.39628	3.8098
1.39661	3.81894
1.39694	3.82806
1.39727	3.83717
1.3976	3.84627
1.39793	3.85535
1.39826	3.86442
1.39859	3.87347
1.39892	3.88251
1.39925	3.89153
1.39958	3.90054
1.39991	3.90954
1.40024	3.91852
1.40057	3.92748
1.4009	3.93643
1.40123	3.94537
1.40156	3.95429
1.40189	3.9632
1.40222	3.97209
1.40255	3.98097
1.40288	3.98983
1.40321	3.99868
1.40354	4.00751
1.40387	4.01633
1.4042	4.02514
1.40453	4.03393
1.40486	4.0427
1.4052	4.05146
1.40553	4.06021
1.40586	4.06894
1.40619	4.07766
1.40652	4.08636
1.40685	4.09505
1.40718	4.10373
1.40751	4.11239
1.40784	4.12103
1.40817	4.12966
1.4085	4.13828
1.40883	4.14688
1.40916	4.15546
1.40949	4.16404
1.40982	4.17259
1.41015	4.18114
1.41048	4.18966
1.41081	4.19818
1.41114	4.20668
1.41147	4.21516
1.4118	4.22363
1.41213	4.23209
1.41246	4.24053
1.41279	4.24895
1.41312	4.25737
1.41345	4.26576
1.41378	4.27415
1.41411	4.28251
1.41444	4.29087
1.41477	4.29921
1.41511	4.30753
1.41544	4.31584
1.41577	4.32413
1.4161	4.33242
1.41643	4.34068
1.41676	4.34893
1.41709	4.35717
1.41742	4.36539
1.41775	4.3736
1.41808	4.38179
1.41841	4.38997
1.41874	4.39814
1.41907	4.40629
1.4194	4.41442
1.41973	4.42254
1.42006	4.43065
1.42039	4.43874
1.42072	4.44682
1.42105	4.45488
1.42138	4.46293
1.42171	4.47096
1.42204	4.47898
1.42237	4.48698
1.4227	4.49497
1.42303	4.50294
1.42336	4.5109
1.42369	4.51885
1.42402	4.52678
1.42435	4.5347
1.42468	4.5426
1.42502	4.55049
1.42535	4.55836
1.42568	4.56622
1.42601	4.57406
1.42634	4.58189
1.42667	4.58971
1.427	4.59751
1.42733	4.60529
1.42766	4.61306
1.42799	4.62082
1.42832	4.62856
1.42865	4.63629
1.42898	4.644
1.42931	4.6517
1.42964	4.65938
1.42997	4.66705
1.43	4.66775
1.4303	4.6747
1.43063	4.68234
1.43096	4.68997
1.43129	4.69758
1.43162	4.70518
1.43195	4.71276
1.43228	4.72033
1.43261	4.72788
1.43294	4.73542
1.43327	4.74294
1.4336	4.75045
1.43393	4.75794
1.43426	4.76542
1.43459	4.77289
1.43492	4.78034
1.43526	4.78777
1.43559	4.79519
1.43592	4.8026
1.43625	4.80999
1.43658	4.81737
1.43691	4.82473
1.43724	4.83208
1.43757	4.83942
1.4379	4.84673
1.43823	4.85404
1.43856	4.86133
1.43889	4.86861
1.43922	4.87587
1.43955	4.88311
1.43988	4.89035
1.44021	4.89756
1.44054	4.90477
1.44087	4.91195
1.4412	4.91913
1.44153	4.92629
1.44186	4.93343
1.44219	4.94056
1.44252	4.94768
1.44285	4.95478
1.44318	4.96186
1.44351	4.96894
1.44384	4.97599
1.44417	4.98304
1.4445	4.99006
1.44483	4.99708
1.44517	5.00408
1.4455	5.01106
1.44583	5.01803
1.44616	5.02499
1.44649	5.03193
1.44682	5.03885
1.44715	5.04576
1.44748	5.05266
1.44781	5.05954
1.44814	5.06641
1.44847	5.07326
1.4488	5.0801
1.44913	5.08693
1.44946	5.09374
1.44979	5.10053
1.45012	5.10731
1.45045	5.11408
1.45078	5.12083
1.45111	5.12757
1.45144	5.13429
1.45177	5.141
1.4521	5.14769
1.45243	5.15437
1.45276	5.16103
1.45309	5.16768
1.45342	5.17432
1.45375	5.18094
1.45408	5.18754
1.45441	5.19413
1.45474	5.20071
1.45508	5.20727
1.45541	5.21382
1.45574	5.22035
1.45607	5.22687
1.4564	5.23337
1.45673	5.23986
1.45706	5.24634
1.45739	5.2528
1.45772	5.25924
1.45805	5.26567
1.45838	5.27209
1.45871	5.27849
1.45904	5.28488
1.45937	5.29125
1.4597	5.29761
1.46003	5.30395
1.46036	5.31028
1.46069	5.3166
1.46102	5.3229
1.46135	5.32918
1.46168	5.33545
1.46201	5.34171
1.46234	5.34795
1.46267	5.35418
1.463	5.36039
1.46333	5.36659
1.46366	5.37277
1.46399	5.37894
1.46432	5.38509
1.46465	5.39123
1.46498	5.39736
1.46532	5.40347
1.46565	5.40956
1.46598	5.41565
1.46631	5.42171
1.46664	5.42776
1.46697	5.4338
1.4673	5.43982
1.46763	5.44583
1.46796	5.45183
1.46829	5.45781
1.46862	5.46377
1.46895	5.46972
1.46928	5.47566
1.46961	5.48158
1.46994	5.48749
1.47027	5.49338
1.4706	5.49925
1.47093	5.50512
1.47126	5.51097
1.47159	5.5168
1.47192	5.52262
1.47225	5.52842
1.47258	5.53421
1.47291	5.53999
1.47324	5.54575
1.47357	5.5515
1.4739	5.55723
1.47423	5.56295
1.47456	5.56865
1.47489	5.57434
1.47523	5.58001
1.47556	5.58567
1.47589	5.59131
1.47622	5.59694
1.47655	5.60256
1.47688	5.60816
1.47721	5.61374
1.47754	5.61932
1.47787	5.62487
1.4782	5.63042
1.47853	5.63594
1.47886	5.64146
1.47919	5.64696
1.47952	5.65244
1.47985	5.65791
1.48018	5.66336
1.48051	5.6688
1.48084	5.67423
1.48117	5.67964
1.4815	5.68504
1.48183	5.69042
1.48216	5.69579
1.48249	5.70114
1.48282	5.70648
1.48315	5.7118
1.48348	5.71711
1.48381	5.72241
1.48414	5.72769
1.48447	5.73295
1.4848	5.73821
1.48514	5.74344
1.48547	5.74866
1.4858	5.75387
1.48613	5.75906
1.48646	5.76424
1.48679	5.76941
1.48712	5.77456
1.48745	5.77969
1.48778	5.78481
1.48811	5.78992
1.48844	5.79501
1.48877	5.80008
1.4891	5.80514
1.48943	5.81019
1.48976	5.81522
1.49	5.81888
1.49009	5.82024
1.49042	5.82525
1.49075	5.83024
1.49108	5.83521
1.49141	5.84017
1.49174	5.84511
1.49207	5.85005
1.4924	5.85496
1.49273	5.85986
1.49306	5.86475
1.49339	5.86962
1.49372	5.87448
1.49405	5.87932
1.49438	5.88415
1.49471	5.88897
1.49505	5.89377
1.49538	5.89855
1.49571	5.90332
1.49604	5.90808
1.49637	5.91282
1.4967	5.91755
1.49703	5.92226
1.49736	5.92696
1.49769	5.93164
1.49802	5.93631
1.49835	5.94096
1.49868	5.9456
1.49901	5.95023
1.49934	5.95484
1.49967	5.95943
1.5	5.96401
1.50033	5.96858
1.50066	5.97313
1.50099	5.97767
1.50132	5.98219
1.50165	5.9867
1.50198	5.99119
1.50231	5.99567
1.50264	6.00014
1.50297	6.00459
1.5033	6.00902
1.50363	6.01344
1.50396	6.01785
1.50429	6.02224
1.50462	6.02662
1.50495	6.03098
1.50529	6.03533
1.50562	6.03966
1.50595	6.04398
1.50628	6.04829
1.50661	6.05258
1.50694	6.05685
1.50727	6.06111
1.5076	6.06536
1.50793	6.06959
1.50826	6.07381
1.50859	6.07801
1.50892	6.0822
1.50925	6.08637
1.50958	6.09053
1.50991	6.09467
1.51024	6.0988
1.51057	6.10292
1.5109	6.10702
1.51123	6.11111
1.51156	6.11518
1.51189	6.11923
1.51222	6.12328
1.51255	6.1273
1.51288	6.13132
1.51321	6.13531
1.51354	6.1393
1.51387	6.14327
1.5142	6.14722
1.51453	6.15116
1.51486	6.15509
1.5152	6.159
1.51553	6.1629
1.51586	6.16678
1.51619	6.17065
1.51652	6.1745
1.51685	6.17834
1.51718	6.18216
1.51751	6.18597
1.51784	6.18977
1.51817	6.19355
1.5185	6.19731
1.51883	6.20106
1.51916	6.2048
1.51949	6.20852
1.51982	6.21223
1.52015	6.21592
1.52048	6.2196
1.52081	6.22326
1.52114	6.22691
1.52147	6.23054
1.5218	6.23416
1.52213	6.23777
1.52246	6.24136
1.52279	6.24494
1.52312	6.2485
1.52345	6.25205
1.52378	6.25558
1.52411	6.2591
1.52444	6.2626
1.52477	6.26609
1.52511	6.26956
1.52544	6.27302
1.52577	6.27647
1.5261	6.2799
1.52643	6.28331
1.52676	6.28671
1.52709	6.2901
1.52742	6.29347
1.52775	6.29683
1.52808	6.30017
1.52841	6.3035
1.52874	6.30682
1.52907	6.31012
1.5294	6.3134
1.52973	6.31667
1.53006	6.31993
1.53039	6.32317
1.53072	6.32639
1.53105	6.32961
1.53138	6.3328
1.53171	6.33599
1.53204	6.33916
1.53237	6.34231
1.5327	6.34545
1.53303	6.34857
1.53336	6.35168
1.53369	6.35478
1.53402	6.35786
1.53435	6.36093
1.53468	6.36398
1.53502	6.36702
1.53535	6.37004
1.53568	6.37305
1.53601	6.37604
1.53634	6.37902
1.53667	6.38198
1.537	6.38493
1.53733	6.38787
1.53766	6.39079
1.53799	6.3937
1.53832	6.39659
1.53865	6.39946
1.53898	6.40233
1.53931	6.40517
1.53964	6.40801
1.53997	6.41083
1.5403	6.41363
1.54063	6.41642
1.54096	6.4192
1.54129	6.42196
1.54162	6.4247
1.54195	6.42743
1.54228	6.43015
1.54261	6.43285
1.54294	6.43554
1.54327	6.43821
1.5436	6.44087
1.54393	6.44352
1.54426	6.44614
1.54459	6.44876
1.54492	6.45136
1.54526	6.45395
1.54559	6.45652
1.54592	6.45907
1.54625	6.46162
1.54658	6.46414
1.54691	6.46666
1.54724	6.46915
1.54757	6.47164
1.5479	6.47411
1.54823	6.47656
1.54856	6.479
1.54889	6.48143
1.54922	6.48384
1.54955	6.48623
1.54988	6.48862
1.55021	6.49098
1.55054	6.49334
1.55087	6.49567
1.5512	6.498
1.55153	6.50031
1.55186	6.5026
1.55219	6.50488
1.55252	6.50715
1.55285	6.5094
1.55318	6.51163
1.55351	6.51386
1.55384	6.51606
1.55417	6.51826
1.5545	6.52043
1.55483	6.5226
1.55517	6.52475
1.5555	6.52688
1.55583	6.529
1.55616	6.5311
1.55649	6.53319
1.55682	6.53527
1.55715	6.53733
1.55748	6.53938
1.55781	6.54141
1.55814	6.54343
1.55847	6.54543
1.5588	6.54742
1.55913	6.54939
1.55946	6.55135
1.55979	6.5533
1.56012	6.55523
1.56045	6.55714
1.56078	6.55905
1.56111	6.56093
1.56144	6.5628
1.56177	6.56466
1.5621	6.56651
1.56243	6.56833
1.56276	6.57015
1.56309	6.57195
1.56342	6.57373
1.56375	6.5755
1.56408	6.57726
1.56441	6.579
1.56474	6.58072
1.56508	6.58244
1.56541	6.58413
1.56574	6.58582
1.56607	6.58748
1.5664	6.58914
1.56673	6.59078
1.56706	6.5924
1.56739	6.59401
1.56772	6.59561
1.56805	6.59719
1.56838	6.59875
1.56871	6.60031
1.56904	6.60184
1.56937	6.60336
1.5697	6.60487
1.57003	6.60637
1.57036	6.60784
1.57069	6.60931
1.57102	6.61076
1.57135	6.61219
1.57168	6.61361
1.57201	6.61502
1.57234	6.61641
1.57267	6.61779
1.573	6.61915
1.57333	6.6205
1.57366	6.62183
1.57399	6.62315
1.57432	6.62445
1.57465	6.62574
1.57498	6.62702
1.57532	6.62828
1.57565	6.62952
1.57598	6.63076
1.57631	6.63197
1.57664	6.63317
1.57697	6.63436
1.5773	6.63553
1.57763	6.63669
1.57796	6.63784
1.57829	6.63897
1.57862	6.64008
1.57895	6.64118
1.57928	6.64227
1.57961	6.64334
1.57994	6.64439
1.58027	6.64544
1.5806	6.64646
1.58093	6.64748
1.58126	6.64847
1.58159	6.64946
1.58192	6.65043
1.58225	6.65138
1.58258	6.65232
1.58291	6.65325
1.58324	6.65416
1.58357	6.65505
1.5839	6.65593
1.58423	6.6568
1.58456	6.65765
1.58489	6.65849
1.58523	6.65932
1.58556	6.66012
1.58589	6.66092
1.58622	6.6617
1.58655	6.66246
1.58688	6.66321
1.58721	6.66395
1.58754	6.66467
1.58787	6.66538
1.5882	6.66607
1.58853	6.66675
1.58886	6.66741
1.58919	6.66806
1.58952	6.66869
1.58985	6.66931
1.59018	6.66992
1.59051	6.67051
1.59084	6.67108
1.59117	6.67165
1.5915	6.67219
1.59183	6.67272
1.59216	6.67324
1.59249	6.67375
1.59282	6.67423
1.59315	6.67471
1.59348	6.67517
1.59381	6.67561
1.59414	6.67604
1.59447	6.67646
1.5948	6.67686
1.59514	6.67724
1.59547	6.67762
1.5958	6.67797
1.59613	6.67832
1.59646	6.67864
1.59679	6.67896
1.59712	6.67926
1.59745	6.67954
1.59778	6.67981
1.59811	6.68007
1.59844	6.68031
1.59877	6.68053
1.5991	6.68075
1.59943	6.68094
1.59976	6.68112
1.60009	6.68129
1.60042	6.68145
1.60075	6.68158
1.60108	6.68171
1.60141	6.68182
1.60174	6.68191
1.60207	6.68199
1.6024	6.68206
1.60273	6.68211
1.60306	6.68215
1.60339	6.68217
1.60372	6.68218
1.60405	6.68217
1.60438	6.68215
1.60471	6.68211
1.60505	6.68206
1.60538	6.682
1.60571	6.68192
1.60604	6.68183
1.60637	6.68172
1.6067	6.68159
1.60703	6.68146
1.60736	6.6813
1.60769	6.68114
1.60802	6.68095
1.60835	6.68076
1.60868	6.68055
1.60901	6.68032
1.60934	6.68008
1.60967	6.67983
1.61	6.67956
1.61033	6.67927
1.61066	6.67898
1.61099	6.67866
1.61132	6.67834
1.61165	6.678
1.61198	6.67764
1.61231	6.67727
1.61264	6.67688
1.61297	6.67648
1.6133	6.67607
1.61363	6.67564
1.61396	6.67519
1.61429	6.67474
1.61462	6.67426
1.61495	6.67378
1.61529	6.67327
1.61562	6.67276
1.61595	6.67223
1.61628	6.67168
1.61661	6.67112
1.61694	6.67055
1.61727	6.66996
1.6176	6.66935
1.61793	6.66873
1.61826	6.6681
1.61859	6.66745
1.61892	6.66679
1.61925	6.66611
1.61958	6.66542
1.61991	6.66472
1.62024	6.664
1.62057	6.66326
1.6209	6.66251
1.62123	6.66175
1.62156	6.66097
1.62189	6.66017
1.62222	6.65937
1.62255	6.65854
1.62288	6.65771
1.62321	6.65686
1.62354	6.65599
1.62387	6.65511
1.6242	6.65421
1.62453	6.6533
1.62486	6.65238
1.6252	6.65144
1.62553	6.65049
1.62586	6.64952
1.62619	6.64854
1.62652	6.64754
1.62685	6.64653
1.62718	6.6455
1.62751	6.64446
1.62784	6.6434
1.62817	6.64233
1.6285	6.64125
1.62883	6.64015
1.62916	6.63904
1.62949	6.63791
1.62982	6.63676
1.63015	6.63561
1.63048	6.63444
1.63081	6.63325
1.63114	6.63205
1.63147	6.63083
1.6318	6.6296
1.63213	6.62836
1.63246	6.6271
1.63279	6.62582
1.63312	6.62453
1.63345	6.62323
1.63378	6.62191
1.63411	6.62058
1.63444	6.61923
1.63477	6.61787
1.63511	6.6165
1.63544	6.61511
1.63577	6.6137
1.6361	6.61228
1.63643	6.61085
1.63676	6.6094
1.63709	6.60794
1.63742	6.60646
1.63775	6.60497
1.63808	6.60346
1.63841	6.60194
1.63874	6.6004
1.63907	6.59885
1.6394	6.59728
1.63973	6.5957
1.64006	6.59411
1.64039	6.5925
1.64072	6.59088
1.64105	6.58924
1.64138	6.58759
1.64171	6.58592
1.64204	6.58424
1.64237	6.58254
1.6427	6.58083
1.64303	6.57911
1.64336	6.57737
1.64369	6.57561
1.64402	6.57384
1.64435	6.57206
1.64468	6.57026
1.64502	6.56845
1.64535	6.56662
1.64568	6.56478
1.64601	6.56292
1.64634	6.56105
1.64667	6.55916
1.647	6.55726
1.64733	6.55535
1.64766	6.55342
1.64799	6.55147
1.64832	6.54952
1.64865	6.54754
1.64898	6.54556
1.64931	6.54355
1.64964	6.54154
1.64997	6.53951
1.6503	6.53746
1.65063	6.5354
1.65096	6.53332
1.65129	6.53123
1.65162	6.52913
1.65195	6.52701
1.65228	6.52488
1.65261	6.52273
1.65294	6.52057
1.65327	6.51839
1.6536	6.5162
1.65393	6.51399
1.65426	6.51177
1.65459	6.50954
1.65492	6.50729
1.65526	6.50502
1.65559	6.50274
1.65592	6.50045
1.65625	6.49814
1.65658	6.49582
1.65691	6.49348
1.65724	6.49113
1.65757	6.48876
1.6579	6.48638
1.65823	6.48399
1.65856	6.48158
1.65889	6.47915
1.65922	6.47671
1.65955	6.47426
1.65988	6.47179
1.66021	6.46931
1.66054	6.46681
1.66087	6.4643
1.6612	6.46177
1.66153	6.45923
1.66186	6.45668
1.66219	6.45411
1.66252	6.45152
1.66285	6.44892
1.66318	6.44631
1.66351	6.44368
1.66384	6.44104
1.66417	6.43838
1.6645	6.43571
1.66483	6.43302
1.66517	6.43032
1.6655	6.4276
1.66583	6.42487
1.66616	6.42213
1.66649	6.41937
1.66682	6.41659
1.66715	6.4138
1.66748	6.411
1.66781	6.40818
1.66814	6.40535
1.66847	6.4025
1.6688	6.39964
1.66913	6.39677
1.66946	6.39387
1.66979	6.39097
1.67012	6.38805
1.67045	6.38512
1.67078	6.38217
1.67111	6.3792
1.67144	6.37622
1.67177	6.37323
1.6721	6.37022
1.67243	6.3672
1.67276	6.36417
1.67309	6.36112
1.67342	6.35805
1.67375	6.35497
1.67408	6.35188
1.67441	6.34877
1.67474	6.34564
1.67508	6.3425
1.67541	6.33935
1.67574	6.33618
1.67607	6.333
1.6764	6.32981
1.67673	6.32659
1.67706	6.32337
1.67739	6.32013
1.67772	6.31687
1.67805	6.3136
1.67838	6.31032
1.67871	6.30702
1.67904	6.30371
1.67937	6.30038
1.6797	6.29704
1.68003	6.29368
1.68036	6.29031
1.68069	6.28692
1.68102	6.28352
1.68135	6.28011
1.68168	6.27668
1.68201	6.27324
1.68234	6.26978
1.68267	6.2663
1.683	6.26282
1.68333	6.25931
1.68366	6.2558
1.68399	6.25226
1.68432	6.24872
1.68465	6.24516
1.68498	6.24158
1.68532	6.23799
1.68565	6.23439
1.68598	6.23077
1.68631	6.22714
1.68664	6.22349
1.68697	6.21983
1.6873	6.21615
1.68763	6.21246
1.68796	6.20875
1.68829	6.20503
1.68862	6.20129
1.68895	6.19754
1.68928	6.19378
1.68961	6.19
1.68994	6.18621
1.69027	6.1824
1.6906	6.17857
1.69093	6.17474
1.69126	6.17089
1.69159	6.16702
1.69192	6.16314
1.69225	6.15924
1.69258	6.15533
1.69291	6.15141
1.69324	6.14747
1.69357	6.14351
1.6939	6.13955
1.69423	6.13556
1.69456	6.13156
1.69489	6.12755
1.69523	6.12353
1.69556	6.11948
1.69589	6.11543
1.69622	6.11136
1.69655	6.10727
1.69688	6.10317
1.69721	6.09906
1.69754	6.09493
1.69787	6.09079
1.6982	6.08663
1.69853	6.08246
1.69886	6.07827
1.69919	6.07407
1.69952	6.06985
1.69985	6.06562
1.70018	6.06138
1.70051	6.05712
1.70084	6.05284
1.70117	6.04855
1.7015	6.04425
1.70183	6.03993
1.70216	6.0356
1.70249	6.03125
1.70282	6.02689
1.70315	6.02251
1.70348	6.01812
1.70381	6.01372
1.70414	6.0093
1.70447	6.00486
1.7048	6.00041
1.70514	5.99595
1.70547	5.99147
1.7058	5.98698
1.70613	5.98247
1.70646	5.97795
1.70679	5.97341
1.70712	5.96886
1.70745	5.9643
1.70778	5.95972
1.70811	5.95512
1.70844	5.95051
1.70877	5.94589
1.7091	5.94125
1.70943	5.9366
1.70976	5.93193
1.71009	5.92725
1.71042	5.92255
1.71075	5.91784
1.71108	5.91311
1.71141	5.90837
1.71174	5.90362
1.71207	5.89885
1.7124	5.89406
1.71273	5.88926
1.71306	5.88445
1.71339	5.87962
1.71372	5.87478
1.71405	5.86992
1.71438	5.86505
1.71471	5.86017
1.71505	5.85527
1.71538	5.85035
1.71571	5.84542
1.71604	5.84048
1.71637	5.83552
1.7167	5.83054
1.71703	5.82556
1.71736	5.82055
1.71769	5.81554
1.71802	5.8105
1.71835	5.80546
1.71868	5.8004
1.71901	5.79532
1.71934	5.79023
1.71967	5.78513
1.72	5.78001

## Sheet: Fig. 4h
x-axis-Time (s)	y-axis-Output Voltage (V)	x-axis-Time (s)	y-axis-Output Voltage (V)	x-axis-Time (s)	y-axis-Output Voltage (V)	x-axis-Time (s)	y-axis-Output Voltage (V)
P-PLA		MRSD-PLA2		MRSD-PLA4		MRSD-PLA6
0.01778	1.41939	45.0585	1.38011	90.02	11.9811	135.033	-14.3248
0.04679	1.30191	45.1082	0.83774	90.0542	12.4617	135.067	-14.0376
0.0798	1.34935	45.2082	1.21762	90.0882	12.4087	135.101	-13.3645
0.1098	1.21549	45.2412	1.95614	90.1227	12.33	135.136	-13.1418
0.13981	1.27702	45.3392	2.04775	90.1566	12.3802	135.17	-13.0164
0.16882	1.14757	45.3723	1.70963	90.1916	12.3132	135.204	-12.9088
0.19882	1.20387	45.4693	1.93183	90.2264	12.1377	135.238	-12.6775
0.22883	1.06227	45.5023	3.77782	90.2605	12.1264	135.273	-12.6752
0.25884	1.10613	45.5703	3.03951	90.2955	12.1591	135.307	-12.7106
0.28884	0.96112	45.6673	3.64771	90.33	12.0304	135.341	-12.6054
0.31885	1.0516	45.7003	4.45568	90.3637	11.8819	135.376	-12.5408
0.34786	0.94762	45.7974	4.92504	90.3987	11.8958	135.411	-12.6517
0.37886	1.029	45.8304	10.4565	90.4337	11.8964	135.444	-12.6618
0.40887	0.9018	45.9284	13.8754	90.4687	11.7539	135.48	-12.5407
0.43888	0.9118	45.9614	14.6066	90.5036	11.6714	135.515	-12.5549
0.46888	0.64105	46.0584	13.5706	90.5375	11.7435	135.549	-12.657
0.49889	0.33893	46.0914	12.1867	90.5715	11.7035	135.583	-12.6096
0.5289	-0.75718	46.1894	11.5537	90.6065	11.5572	135.618	-12.516
0.5579	-3.7645	46.2225	12.5195	90.6405	11.5771	135.652	-12.5984
0.62635	-4.12125	46.3195	12.0515	90.6755	11.6302	135.686	-12.6478
0.65636	-4.02403	46.3515	10.7577	90.7086	11.5092	135.72	-12.5362
0.68736	-4.00132	46.4505	10.3442	90.7435	11.428	135.754	-12.5334
0.71837	-3.84246	46.4835	11.3162	90.7781	11.51	135.788	-12.6431
0.74938	-3.82717	46.5805	11.1977	90.8121	11.4742	135.823	-12.11
0.77838	-3.62396	46.6135	10.0115	90.8461	11.3337	135.857	-1.04758
0.80839	-3.63769	46.7096	9.61737	90.8801	11.3657	135.891	6.78036
0.8394	-3.49002	46.7426	10.659	90.9142	11.2778	135.925	8.86996
0.8684	-3.55067	46.8396	10.2181	90.949	10.2932	135.96	8.81174
0.89941	-3.41327	46.8726	8.23344	90.9832	7.91724	135.994	8.05655
0.92942	-3.47162	46.9706	0.35884	91.0172	1.99533	136.028	7.27512
0.96042	-3.35892	47.0201	1.06022	91.0512	-3.10538	136.062	6.81482
0.99043	-3.40934	47.1171	1.35415	91.0852	-5.59445	136.096	6.49146
1.02044	-3.31025	47.1511	0.91798	91.1191	-6.26736	136.13	6.07605
1.05045	-3.35774	47.2472	1.37759	91.1532	-6.48486	136.164	5.82019
1.08045	-3.26152	47.2802	2.07684	91.1872	-6.65024	136.199	5.74619
1.11146	-3.31399	47.3772	3.50938	91.2211	-6.6268	136.233	5.54688
1.14147	-3.23726	47.4452	3.18835	91.2552	-6.49683	136.267	5.32739
1.17147	-3.28022	47.5432	3.77785	91.2892	-6.50333	136.3	5.32401
1.20148	-3.22275	47.5752	3.54831	91.3232	-6.50455	136.335	5.26282
1.23149	-3.27068	47.6733	3.472	91.3572	-6.36295	136.369	5.069
1.26249	-3.22638	47.7063	3.71587	91.3912	-6.3251	136.402	5.04929
1.2925	-3.25186	47.8033	5.80793	91.4252	-6.37082	136.436	5.0827
1.32359	-3.21822	47.8363	11.9011	91.4592	-6.26767	136.471	4.93695
1.3536	-3.21829	47.9333	13.6618	91.4931	-6.18958	136.505	4.85797
1.38361	-3.19347	47.9673	13.3247	91.5272	-6.25943	136.539	4.93286
1.41361	1.36508	48.0645	12.6987	91.5612	-6.22333	136.574	4.8688
1.46349	1.92457	48.0975	12.8206	91.5952	-6.103	136.608	4.73779
1.49349	2.08875	48.1945	11.4638	91.6298	-6.13141	136.641	4.7901
1.56125	2.02541	48.2275	10.873	91.6638	-6.15634	136.675	4.823
1.59125	1.79355	48.3245	10.9852	91.6978	-6.03842	136.71	4.68454
1.641	1.75819	48.3586	11.3784	91.7314	-6.01968	136.744	4.67227
1.671	1.59847	48.4576	10.9503	91.7662	-6.08698	136.779	4.75586
1.70201	1.61412	48.4906	9.74883	91.8004	-6.02063	136.813	4.69678
1.73201	1.49684	48.5877	9.51732	91.8338	-5.92941	136.847	4.48022
1.76202	1.51296	48.6217	10.5895	91.8679	-5.99432	136.881	3.5567
1.79303	1.43348	48.7197	10.6034	91.9028	-3.42902	136.915	0.98315
1.82303	1.42807	48.7527	9.60566	91.9361	5.94714	136.949	-5.54672
1.85404	1.36802	48.8507	8.73794	91.9702	10.6111	136.983	-12.7525
1.88405	1.32979	48.8837	8.3892	92.0041	12.1418	137.017	-14.23
1.91405	1.28285	48.9838	0.19943	92.0392	12.5883	137.052	-13.9749
1.94406	1.25085	49.033	0.4302	92.0731	12.6589	137.087	-13.3708
1.97407	1.20587	49.131	0.81082	92.1073	12.4875	137.121	-13.1835
2.00408	1.15554	49.164	1.35051	92.1413	12.4083	137.155	-12.9087
2.03508	1.14173	49.263	1.80182	92.176	12.4501	137.189	-12.8643
2.06509	1.08254	49.296	1.78444	92.2101	12.331	137.224	-12.8557
2.0951	1.08362	49.3931	1.80092	92.245	12.1837	137.259	-12.6785
2.1252	1.03318	49.4261	1.90283	92.2792	12.2145	137.293	-12.6233
2.15621	1.05577	49.5251	3.21735	92.3133	12.2115	137.327	-12.691
2.18622	0.98839	49.593	3.40483	92.3474	12.0437	137.362	-12.6455
2.21622	1.03261	49.694	3.86635	92.3816	11.9751	137.396	-12.5507
2.24623	0.9621	49.727	3.68209	92.4167	12.0109	137.431	-12.6229
2.27724	1.01603	49.825	9.88614	92.4507	11.9081	137.465	-12.6819
2.30724	0.92744	49.858	14.3447	92.4855	11.7541	137.501	-12.5843
2.33825	1.0032	49.9581	14.6571	92.5201	11.7782	137.535	-12.557
2.36926	0.89655	49.9911	13.2695	92.5546	11.8081	137.568	-12.6587
2.40026	0.97234	50.0891	12.18	92.5886	11.671	137.603	-12.6414
2.43027	0.79812	50.1221	12.7962	92.6236	11.5798	137.637	-12.5356
2.46028	0.73826	50.2201	12.4324	92.6579	11.644	137.671	-12.5926
2.49128	0.26706	50.2531	11.7044	92.6926	11.6286	137.705	-12.6736
2.52129	-0.57248	50.3511	10.8343	92.7266	11.4753	137.741	-12.5701
2.5523	-3.81466	50.3842	11.1017	92.7609	11.471	137.775	-12.5295
2.61939	-4.06682	50.484	10.704	92.7955	11.5338	137.809	-12.63
2.64963	-4.15553	50.517	11.2929	92.8295	11.4236	137.843	-6.74719
2.68164	-3.99103	50.616	10.827	92.8645	11.3199	137.877	4.78787
2.71164	-3.97364	50.649	9.74369	92.8985	11.3801	137.912	8.52121
2.74265	-3.806	50.748	9.51309	92.9325	10.9733	137.946	8.99203
2.77366	-3.73419	50.782	10.4868	92.9675	9.46143	137.981	8.37689
2.80466	-3.64403	50.8791	9.09351	93.0015	5.77603	138.015	7.68228
2.83467	-3.57343	50.9131	5.97377	93.0352	-0.87186	138.049	6.96899
2.86568	-3.57302	51.0121	1.00674	93.0712	-4.61014	138.082	6.53683
2.89668	-3.48426	51.0601	1.29223	93.1042	-6.16589	138.117	6.29663
2.92669	-3.51861	51.1591	1.78685	93.1383	-6.48355	138.15	5.94922
2.9577	-3.40598	51.1921	1.2795	93.173	-6.6333	138.185	5.67889
2.9877	-3.44891	51.2912	1.6109	93.2066	-6.75827	138.219	5.62323
3.01771	-3.31081	51.3242	1.78158	93.2407	-6.69388	138.254	5.49063
3.04872	-3.3545	51.4222	3.29614	93.2752	-6.58804	138.288	5.25784
3.08072	-3.22931	51.49	3.07371	93.3092	-6.63904	138.322	5.21866
3.11173	-3.29774	51.587	3.27361	93.3432	-6.64539	138.356	5.22842
3.14174	-3.21162	51.621	4.27589	93.3773	-6.51749	138.39	5.07111
3.17175	-3.27428	51.72	4.52086	93.4113	-6.49487	138.425	4.96274
3.20275	-3.2024	51.754	4.50916	93.4453	-6.56427	138.459	5.02707
3.23376	-3.23945	51.8541	13.7056	93.4792	-6.47516	138.493	4.95694
3.26477	-3.23074	51.8871	14.0522	93.5139	-6.39197	138.526	4.81677
3.29577	-3.19937	51.9861	13.319	93.5472	-6.46677	138.56	4.86002
3.32578	-3.25746	52.0201	14.0645	93.5821	-6.44043	138.595	4.88766
3.35679	-3.20441	52.1181	13.2582	93.6161	-6.31619	138.629	4.74756
3.38679	-2.77955	52.1511	12.2342	93.6494	-6.35556	138.663	4.72018
3.4168	1.74802	52.2492	11.4398	93.6841	-6.39368	138.697	4.81177
3.46701	2.04222	52.2832	11.4725	93.7175	-6.27133	138.731	4.7276
3.49701	2.06292	52.3832	11.1046	93.7512	-6.245	138.765	4.62952
3.56403	1.78122	52.418	11.7723	93.7861	-6.32178	138.799	4.7196
3.6127	1.68125	52.517	11.474	93.8195	-6.2399	138.833	4.6741
3.64371	1.65141	52.5501	10.3541	93.8537	-6.15298	138.868	3.75967
3.67494	1.56414	52.6491	9.95085	93.8878	-6.00644	138.901	1.55106
3.70594	1.48731	52.6821	10.4336	93.9212	0.99915	138.935	-3.96286
3.73595	1.48842	52.7821	10.3581	93.9552	8.7652	138.97	-11.7214
3.76796	1.40362	52.8151	10.5238	93.9902	11.4133	139.004	-14.3257
3.79951	1.467	52.9131	7.22205	94.0251	12.1521	139.039	-14.069
3.83052	1.33467	52.9791	2.21363	94.0589	12.3932	139.074	-13.3413
3.86053	1.39994	53.0122	1.06498	94.0936	12.4223	139.108	-13.2437
3.89153	1.27179	53.1102	0.71526	94.1271	12.2407	139.142	-13.0488
3.92154	1.33066	53.1442	0.89097	94.1623	12.1641	139.176	-12.8234
3.95255	1.21389	53.2422	1.47362	94.1961	12.2148	139.211	-12.8017
3.98255	1.23952	53.2752	1.88527	94.2301	12.1171	139.246	-12.8017
4.01356	1.14977	53.3732	1.93658	94.2641	11.9784	139.28	-12.6891
4.04457	1.12915	53.4072	1.80219	94.2991	12.0136	139.315	-12.6092
4.07557	1.08509	53.5063	2.04423	94.3331	12.0225	139.349	-12.6849
4.10558	1.03871	53.5403	3.60244	94.3669	11.8441	139.384	-12.6953
4.13659	1.07522	53.6073	3.21202	94.402	11.7773	139.418	-12.6029
4.16759	0.9816	53.7063	3.50943	94.4361	11.8285	139.453	-12.587
4.1986	1.04591	53.7403	4.38152	94.4711	11.7371	139.487	-12.6898
4.22961	0.92608	53.8383	12.4066	94.5051	11.5982	139.521	-12.6708
4.25961	1.00016	53.8724	14.2379	94.5395	11.6377	139.557	-12.5609
4.29062	0.89068	53.9704	13.8436	94.5742	11.6651	139.592	-12.5846
4.32163	0.96966	54.0034	13.248	94.6087	11.5433	139.626	-12.6786
4.35164	0.8769	54.1014	12.6583	94.6436	11.458	139.661	-12.609
4.38264	0.94081	54.1354	13.1088	94.6775	11.5339	139.695	-12.5335
4.41265	0.83488	54.2334	12.3468	94.7115	11.5063	139.729	-12.6251
4.44366	0.77447	54.2664	11.1461	94.7466	11.3604	139.764	-12.6494
4.47466	0.50949	54.3645	10.6838	94.7801	11.3748	139.797	-12.5314
4.50467	0.07728	54.3975	11.6737	94.815	11.4363	139.833	-11.6106
4.53568	-1.36388	54.4955	11.4905	94.8491	11.3225	139.867	0.01715
4.56668	-4.06504	54.5295	10.3241	94.8835	11.2372	139.901	7.23404
4.63396	-4.09492	54.6275	9.90251	94.9182	11.0925	139.935	9.07172
4.66527	-4.12211	54.6605	10.462	94.9524	10.0934	139.969	8.64868
4.69728	-3.97837	54.7586	10.4829	94.9864	7.31433	140.005	7.8374
4.72828	-3.93747	54.7926	10.2462	95.0204	0.89737	140.039	7.29355
4.75929	-3.75202	54.8906	7.94361	95.0552	-3.66467	140.074	6.82101
4.7903	-3.74819	54.9246	4.50556	95.0896	-5.83783	140.108	6.32596
4.8213	-3.60699	55.0226	0.34868	95.1235	-6.52435	140.142	6.07205
4.85231	-3.63652	55.072	0.88417	95.1579	-6.67093	140.175	5.92783
4.88332	-3.54033	55.17	1.12137	95.1923	-6.6929	140.21	5.65073
4.91432	-3.52498	55.204	1.16089	95.2268	-6.77582	140.244	5.46423
4.94533	-3.49319	55.302	1.53964	95.2618	-6.73447	140.278	5.46255
4.97634	-3.42062	55.335	3.24502	95.2951	-6.61884	140.312	5.32297
5.00735	-3.45786	55.4021	2.61966	95.3298	-6.64429	140.345	5.13263
5.03835	-3.35218	55.5011	3.15354	95.3631	-6.66904	140.379	5.14908
5.06836	-3.4103	55.5351	3.9517	95.3981	-6.55081	140.413	5.12598
5.10037	-3.30441	55.6331	4.05123	95.4313	-6.51535	140.448	4.94586
5.13037	-3.37423	55.6661	3.25618	95.4663	-6.58435	140.482	4.93277
5.16238	-3.28925	55.7661	3.57436	95.5003	-6.50308	140.516	4.9856
5.19339	-3.32178	55.8002	4.29607	95.535	-6.40799	140.55	4.86346
5.22439	-3.29803	55.8982	14.7962	95.5688	-6.45145	140.584	4.77475
5.25537	-3.29904	55.9312	14.719	95.6028	-6.45752	140.618	4.85968
5.28638	-3.30516	56.0312	13.7077	95.6371	-6.34143	140.652	4.82709
5.31738	-3.25132	56.0652	12.5954	95.6711	-6.30789	140.686	4.69043
5.34848	-3.29119	56.1632	11.8811	95.7061	-6.37689	140.72	4.73514
5.37849	-3.1795	56.1972	12.8071	95.7401	-6.29807	140.755	4.79138
5.41063	1.4237	56.2943	12.3895	95.7732	-6.20645	140.788	4.66464
5.46004	1.94611	56.3283	11.1814	95.8077	-6.26865	140.823	4.61716
5.49104	1.99779	56.4264	10.6735	95.8421	-6.25348	140.857	4.26047
5.52253	2.0594	56.4944	11.5656	95.8755	-6.12622	140.891	2.55914
5.55453	1.89032	56.5274	10.4008	95.9097	-1.77695	140.926	-1.65448
5.58554	1.7913	56.6254	9.95956	95.9447	7.11517	140.959	-9.2088
5.61655	1.69903	56.6594	10.6223	95.9784	10.8302	140.994	-13.884
5.64756	1.55912	56.7575	10.5482	96.0134	12.1703	141.029	-14.1831
5.67856	1.54514	56.7915	10.4915	96.0473	12.3224	141.064	-13.7299
5.70957	1.38062	56.8905	8.54621	96.0813	12.3264	141.097	-13.2975
5.74158	1.40967	56.9245	5.02592	96.1166	12.3845	141.132	-12.9893
5.77258	1.2654	57.0225	0.3495	96.1506	12.2741	141.167	-12.8869
5.80359	1.29164	57.0716	1.14521	96.184	12.1253	141.202	-12.8062
5.8346	1.1991	57.1716	1.50711	96.219	12.1379	141.236	-12.676
5.8656	1.18271	57.2047	1.11952	96.2534	12.1599	141.271	-12.6517
5.89614	1.15465	57.3036	1.51904	96.2884	12.0087	141.304	-12.7154
5.92715	1.09575	57.3376	2.00185	96.3227	11.9187	141.339	-12.6217
5.95916	1.13274	57.4357	3.53897	96.3561	11.9554	141.374	-12.5584
5.99016	1.02144	57.503	2.81062	96.3911	11.8731	141.408	-12.6692
6.02117	1.09427	57.603	3.17648	96.4254	11.7177	141.442	-12.6744
6.05318	0.98142	57.636	4.17309	96.4594	11.7393	141.476	-12.558
6.08418	1.02036	57.735	4.56971	96.4943	11.7801	141.511	-12.5944
6.11519	0.982	57.7681	4.04071	96.5284	11.6502	141.545	-12.6845
6.1472	0.94014	57.8671	13.5389	96.5623	11.5638	141.579	-12.6046
6.17821	0.97888	57.9011	14.2377	96.5974	11.6249	141.614	-12.5233
6.20921	0.8815	58.0001	13.6352	96.6325	11.611	141.648	-12.6308
6.24022	0.96845	58.0341	14.0662	96.666	11.4641	141.682	-12.651
6.27123	0.86524	58.1331	13.2988	96.701	11.4465	141.717	-12.5396
6.30223	0.96235	58.1661	12.0482	96.7354	11.5193	141.751	-12.5619
6.33224	0.8636	58.2652	11.3696	96.769	11.4207	141.785	-12.6564
6.36325	0.93331	58.2982	11.8451	96.8041	11.3065	141.82	-12.5865
6.39425	0.87459	58.3972	11.5643	96.8386	11.3694	141.854	-6.19632
6.42526	0.85297	58.4316	11.7156	96.8724	11.3733	141.888	4.91898
6.45627	0.76379	58.5316	11.39	96.9067	11.1406	141.922	8.54025
6.48727	0.51745	58.5656	10.2284	96.9412	10.4063	141.957	9.12067
6.51928	0.12222	58.6646	9.935	96.9754	8.47256	141.991	8.39133
6.55129	-1.43064	58.6987	10.3319	97.009	2.9408	142.025	7.56973
6.58229	-4.05441	58.7967	10.5162	97.0435	-2.75635	142.059	7.05746
6.64941	-4.15548	58.8297	10.2884	97.0772	-5.35861	142.094	6.67868
6.68142	-4.07642	58.9317	5.61887	97.1121	-6.30923	142.127	6.21597
6.71243	-4.07051	58.9657	2.02001	97.1451	-6.66138	142.161	5.95374
6.74343	-3.87558	59.0647	0.8001	97.1796	-6.69299	142.196	5.84753
6.77444	-3.82156	59.113	1.63264	97.2136	-6.60504	142.229	5.60529
6.80545	-3.71612	59.212	1.92853	97.2475	-6.65659	142.264	5.39371
6.83746	-3.63288	59.246	1.38561	97.2818	-6.63098	142.298	5.39334
6.86846	-3.64409	59.345	1.67271	97.3158	-6.49829	142.332	5.2944
6.89947	-3.51989	59.378	1.88803	97.3502	-6.48904	142.366	5.09988
6.93048	-3.58226	59.4781	2.0685	97.3835	-6.53079	142.399	5.10251
6.96248	-3.46095	59.5111	4.08483	97.4185	-6.42618	142.433	5.11398
6.99349	-3.50706	59.5791	3.60233	97.4525	-6.33252	142.467	4.94617
7.0245	-3.44299	59.6771	4.00047	97.4865	-6.39987	142.501	4.89523
7.0555	-3.4129	59.7111	4.55801	97.5205	-6.34833	142.536	4.9726
7.08651	-3.38279	59.8101	5.62447	97.5552	-6.23697	142.57	4.87592
7.11752	-3.33332	59.8441	11.2746	97.5894	-6.2395	142.604	4.76074
7.14853	-3.37923	59.9452	13.9978	97.6231	-6.2822	142.638	4.83353
7.18056	-3.28078	59.9792	13.6677	97.6579	-6.16132	142.672	4.83603
7.21057	-3.3578	60.0782	12.8657	97.6911	-6.11136	142.707	4.69269
7.24157	-3.27236	60.1122	13.465	97.7262	-6.17108	142.741	4.71002
7.27358	-3.35669	60.2122	12.8553	97.7601	-6.11942	142.774	4.78696
7.30459	-3.28411	60.2464	11.8701	97.7948	-6.00266	142.809	4.68033
7.33559	-3.30261	60.3464	11.289	97.8289	-6.01617	142.843	4.58176
7.3666	-3.31033	60.3794	11.002	97.863	-6.05862	142.876	3.9707
7.39761	-3.2203	60.4794	10.5645	97.897	-5.94266	142.911	1.85217
7.42862	1.27662	60.5134	11.5079	97.932	-3.09442	142.945	-3.44678
7.47863	1.8767	60.6136	11.1855	97.9653	6.07483	142.979	-11.1059
7.50963	1.95879	60.6466	10.4455	97.9991	10.5639	143.013	-14.1512
7.54064	2.04259	60.7467	10.1496	98.0343	12.2413	143.047	-14.1322
7.57265	1.8398	60.7797	9.70405	98.0685	12.5257	143.082	-13.5247
7.60365	1.80619	60.8777	8.94179	98.1026	12.509	143.116	-13.1612
7.63466	1.64428	60.9117	8.34365	98.1366	12.5732	143.15	-12.9435
7.66567	1.5899	61.0107	0.98449	98.1708	12.5114	143.185	-12.9207
7.69767	1.51289	61.0605	0.31587	98.2056	12.3503	143.219	-12.7369
7.72868	1.3887	61.1595	0.75696	98.2411	12.3038	143.254	-12.6101
7.76069	1.40581	61.1935	1.64708	98.2756	12.3654	143.288	-12.6634
7.7917	1.25922	61.2915	2.00372	98.3101	12.2746	143.322	-12.6714
7.8237	1.30108	61.3255	1.45895	98.3441	12.1289	143.357	-12.5299
7.85471	1.19224	61.4246	1.76274	98.3778	12.1351	143.391	-12.5543
7.88672	1.17143	61.4586	1.88291	98.4128	12.1325	143.425	-12.6571
7.91772	1.17266	61.5576	3.24154	98.4466	11.9764	143.459	-12.5952
7.94973	1.06768	61.6258	3.53363	98.4809	11.9099	143.493	-12.5163
7.98074	1.13428	61.7248	4.18784	98.5159	11.9639	143.528	-12.602
8.01175	1.01187	61.7588	3.69507	98.5509	11.9252	143.562	-12.6492
8.04375	1.07676	61.8588	12.5507	98.5851	11.7701	143.597	-12.5463
8.07476	1.00045	61.8928	14.9897	98.6201	11.7626	143.632	-12.5059
8.10577	1.00502	61.9929	14.3588	98.6541	11.8214	143.667	-12.6127
8.13677	0.98444	62.0269	13.6198	98.689	11.7094	143.702	-12.6179
8.16878	0.93288	62.1259	12.5784	98.7231	11.598	143.735	-12.5073
8.20079	0.99622	62.1599	11.7907	98.7571	11.6583	143.77	-12.5428
8.23179	0.88813	62.2589	11.3706	98.7912	11.6505	143.805	-12.6301
8.2628	0.9661	62.2919	12.2195	98.8255	11.4997	143.838	-11.5001
8.29381	0.88258	62.3909	11.762	98.8601	11.4854	143.873	0.40536
8.32582	0.91222	62.425	10.7524	98.8946	11.5474	143.907	7.28879
8.35782	0.90809	62.525	10.5454	98.929	11.037	143.941	9.00424
8.38983	0.8388	62.559	10.0371	98.963	9.5351	143.976	8.77972
8.42185	0.87085	62.658	9.79301	98.997	5.86194	144.01	7.97403
8.45386	0.65148	62.725	10.1348	99.0311	-0.79126	144.044	7.23386
8.48486	0.37766	62.759	9.50696	99.0651	-4.49258	144.078	6.83032
8.51687	-0.28104	62.858	9.09687	99.1001	-5.94339	144.112	6.4711
8.54788	-1.98852	62.8921	9.20454	99.1339	-6.25476	144.146	6.05457
8.57988	-4.04711	62.9931	0.3178	99.1672	-6.47672	144.18	5.84525
8.64699	-4.10155	63.0431	0.09023	99.2011	-6.51822	144.214	5.76028
8.67899	-4.08276	63.1421	0.56314	99.2352	-6.39233	144.249	5.52396
8.71042	-4.04472	63.1761	0.9699	99.2702	-6.37567	144.283	5.33807
8.74243	-3.8364	63.2762	1.37759	99.3041	-6.42676	144.317	5.35486
8.77444	-3.82044	63.3422	1.44534	99.3382	-6.30957	144.351	5.25333
8.80544	-3.69987	63.3762	1.65643	99.3714	-6.21774	144.385	5.06772
8.83645	-3.64847	63.4752	1.89823	99.4057	-6.25534	144.418	5.08328
8.86961	-3.65941	63.5421	1.94836	99.4411	-6.2644	144.452	5.08878
8.90062	-3.5337	63.5761	2.04969	99.4752	-6.13779	144.486	4.92258
8.93263	-3.602	63.6751	3.49607	99.5098	-6.11588	144.52	4.89255
8.96363	-3.48185	63.7431	3.48402	99.5438	-6.15973	144.555	4.9628
8.99464	-3.50956	63.8421	10.5663	99.5782	-6.06003	144.589	4.85855
9.02665	-3.45992	63.8761	13.6757	99.6122	-5.97107	144.623	4.76028
9.05765	-3.40302	63.9761	13.2977	99.6462	-6.03604	144.657	4.83957
9.08966	-3.4347	64.0101	13.9122	99.6801	-6.00748	144.691	4.83255
9.12067	-3.33753	64.1102	13.0074	99.7136	-5.89169	144.726	4.69174
9.15268	-3.42186	64.1442	11.9177	99.7482	-5.93423	144.76	4.72141
9.18468	-3.34482	64.2432	11.3475	99.7825	-5.97614	144.794	4.79245
9.21669	-3.35465	64.2772	10.9155	99.8176	-5.86847	144.828	4.69949
9.2487	-3.38435	64.3772	10.5091	99.8516	-5.79395	144.862	4.42828
9.2797	-3.30809	64.4112	11.4409	99.8849	-5.85333	144.896	3.34613
9.31171	-3.38609	64.5102	11.1399	99.9191	-1.02536	144.931	0.35507
9.34272	-3.28041	64.5443	10.3856	99.9531	7.85529	144.966	-6.83652
9.37473	-3.32765	64.6443	10.2454	99.9872	11.2191	145	-13.3469
9.40673	1.00204	64.6783	9.49268	100.022	12.3886	145.034	-14.2135
9.45604	1.71025	64.7783	9.2871	100.057	12.7386	145.069	-13.9071
9.48705	1.97281	64.8123	10.2519	100.09	12.7503	145.103	-13.4032
9.51906	2.0267	64.9113	7.88974	100.125	12.5643	145.137	-13.0544
9.55107	1.85	64.9453	4.59279	100.16	12.5097	145.172	-12.8585
9.58307	1.82891	65.0464	1.17309	100.194	12.5264	145.206	-12.8292
9.61508	1.64609	65.095	0.50339	100.227	12.3758	145.24	-12.7178
9.64709	1.57349	65.195	1.18652	100.263	12.2302	145.274	-12.5886
9.67909	1.51519	65.262	1.24974	100.297	12.2772	145.309	-12.6117
9.7111	1.37369	65.295	1.47975	100.33	12.2585	145.344	-12.6685
9.74311	1.39437	65.394	1.81191	100.365	12.0913	145.378	-12.5662
9.77512	1.266	65.428	3.67778	100.399	12.0356	145.411	-12.5192
9.80712	1.23995	65.4961	2.92044	100.433	12.0601	145.446	-12.6223
9.83913	1.23521	65.5951	3.41518	100.468	11.9333	145.48	-12.6164
9.87114	1.11742	65.6621	3.70683	100.502	11.8334	145.515	-12.4951
9.90314	1.18113	65.6961	3.59634	100.536	11.8991	145.549	-12.5562
9.93515	1.0712	65.7961	3.94649	100.571	11.891	145.583	-12.6311
9.96716	1.07014	65.8301	6.24735	100.605	11.7356	145.618	-12.5353
9.99917	1.08291	65.9312	15.187	100.639	11.6855	145.652	-12.482
10.0312	0.98412	65.9652	14.7228	100.674	11.7469	145.687	-12.5854
10.0632	1.05805	66.0662	13.8445	100.709	11.6691	145.721	-12.6001
10.1142	0.93684	66.1002	12.4915	100.743	11.5172	145.755	-12.4853
10.1388	0.99782	66.2002	11.7908	100.777	11.5443	145.789	-12.5142
10.1708	0.91085	66.2342	11.9864	100.812	11.5848	145.824	-12.5999
10.2028	0.98403	66.3342	11.4959	100.846	11.4461	145.859	-11.4193
10.2348	0.8949	66.3683	12.1113	100.881	11.372	145.892	0.52911
10.2668	0.9164	66.4683	11.7604	100.914	11.2721	145.927	7.38834
10.2988	0.91865	66.5353	10.5124	100.949	10.3001	145.961	9.04083
10.3299	0.85115	66.5693	11.4246	100.983	7.74429	145.995	8.78934
10.3619	0.9303	66.6683	11.1723	101.018	1.39896	146.03	7.99136
10.3939	0.83025	66.7023	10.169	101.052	-3.30887	146.064	7.25479
10.4259	0.84223	66.8014	9.91619	101.086	-5.6048	146.098	6.8511
10.4579	0.69234	66.8356	9.50852	101.12	-6.33578	146.132	6.49802
10.4899	0.31232	66.9356	5.03646	101.154	-6.49808	146.165	6.0755
10.5209	-0.30147	66.9696	3.04492	101.188	-6.59485	146.199	5.87866
10.5529	-2.00294	67.0696	0.93694	101.222	-6.66556	146.233	5.78876
10.5859	-4.06314	67.1201	0.67363	101.256	-6.56531	146.268	5.5517
10.6529	-4.14008	67.2202	1.25555	101.291	-6.49271	146.302	5.37671
10.6849	-4.05128	67.2532	1.55178	101.325	-6.55847	146.335	5.3938
10.7169	-3.98608	67.3522	1.87301	101.36	-6.53595	146.369	5.28107
10.749	-3.90145	67.3872	3.70502	101.394	-6.39755	146.404	5.10117
10.782	-3.73618	67.4542	3.09019	101.428	-6.41418	146.437	5.12305
10.8137	-3.76543	67.5553	3.31291	101.462	-6.45801	146.472	5.12335
10.8457	-3.65559	67.6223	3.81086	101.496	-6.35944	146.507	4.97473
10.8778	-3.62113	67.6563	3.50363	101.531	-6.27704	146.542	4.89963
10.9098	-3.61701	67.7563	3.74812	101.565	-6.34406	146.576	4.97565
10.9418	-3.51032	67.7903	4.69597	101.599	-6.30704	146.61	4.91452
10.9738	-3.56059	67.8913	14.0331	101.632	-6.18512	146.643	4.78055
11.0068	-3.48139	67.9584	14.1484	101.666	-6.21945	146.678	4.81863
11.0388	-3.4288	67.9934	14.034	101.701	-6.25058	146.713	4.87106
11.0698	-3.4634	68.0954	12.7521	101.736	-6.14203	146.747	4.76096
11.1018	-3.35642	68.1294	13.5415	101.77	-6.08817	146.781	4.69159
11.1338	-3.42094	68.2284	12.8725	101.804	-6.1618	146.816	4.78583
11.1658	-3.35698	68.2625	12.1798	101.838	-6.10562	146.85	4.72498
11.1988	-3.33985	68.3625	11.6828	101.872	-5.99765	146.884	3.92288
11.2308	-3.40267	68.3965	10.8588	101.906	-4.70755	146.918	1.93344
11.2628	-3.30438	68.4975	10.4831	101.94	4.2988	146.952	-3.15567
11.2948	-3.37676	68.5315	10.9837	101.974	10.0243	146.986	-11.0528
11.3269	-3.32568	68.6325	10.5001	102.008	11.9138	147.021	-14.3
11.3589	-3.2936	68.6666	11.2085	102.043	12.3196	147.055	-14.0821
11.3899	-3.32243	68.7686	10.9193	102.076	12.4548	147.089	-13.529
11.4219	0.94505	68.8356	9.47101	102.111	12.4879	147.124	-13.3203
11.4713	1.6711	68.8696	9.86678	102.145	12.3117	147.158	-12.9576
11.5033	2.04641	68.9716	2.82667	102.179	12.2085	147.192	-12.7565
11.5353	1.9825	69.0386	0.88565	102.213	12.2612	147.226	-12.7469
11.5674	1.92396	69.0886	1.34636	102.248	12.1836	147.261	-12.694
11.5994	1.82665	69.1887	1.70511	102.282	12.0254	147.295	-12.5516
11.6314	1.65438	69.2227	1.55443	102.317	12.0412	147.329	-12.5802
11.6634	1.64589	69.3237	2.03711	102.351	12.0625	147.363	-12.6322
11.6954	1.48281	69.3577	1.7686	102.385	11.8824	147.398	-12.5656
11.7284	1.41448	69.4577	2.01521	102.419	11.7886	147.432	-12.5105
11.7614	1.41282	69.4927	3.22802	102.454	11.8413	147.466	-12.5899
11.7944	1.26899	69.5597	3.36681	102.488	11.7699	147.501	-12.6064
11.8274	1.27035	69.6607	3.85277	102.522	11.6204	147.535	-12.4906
11.8594	1.23115	69.6947	3.66757	102.557	11.6455	147.57	-12.5128
11.8914	1.13031	69.7947	3.90923	102.591	11.6852	147.603	-12.5994
11.9234	1.19163	69.8287	7.78459	102.625	11.5559	147.638	-12.5382
11.9554	1.0762	69.9278	15.2443	102.66	11.4758	147.673	-12.4622
11.9885	1.06093	69.9618	14.5414	102.694	11.5536	147.707	-12.5362
12.0215	1.09819	70.0638	13.8273	102.728	11.5136	147.742	-12.5943
12.0525	0.98646	70.0978	12.5743	102.763	11.3788	147.777	-12.4791
12.0865	1.03518	70.2018	12.4955	102.797	11.3792	147.81	-12.4692
12.1195	1.01735	70.2358	11.5072	102.831	11.4486	147.844	-10.7728
12.1515	0.93051	70.3368	11.0029	102.866	11.347	147.879	1.65497
12.1845	1.00432	70.3699	11.6622	102.9	11.2151	147.913	7.86108
12.2165	0.92545	70.4709	11.0904	102.935	10.7842	147.947	9.14349
12.2495	0.91004	70.5049	11.6029	102.969	9.21378	147.981	8.61954
12.2815	0.96628	70.6049	11.2988	103.003	4.79877	148.016	7.98199
12.3135	0.86219	70.6389	10.2051	103.037	-1.61694	148.05	7.34125
12.3466	0.92391	70.7379	9.83978	103.071	-4.85751	148.084	6.73373
12.3786	0.89254	70.7709	10.1093	103.106	-6.24728	148.118	6.40048
12.4106	0.82864	70.871	9.33084	103.139	-6.64453	148.153	6.20609
12.4426	0.81997	70.905	8.75169	103.174	-6.67477	148.187	5.8826
12.4746	0.51493	71.005	0.95094	103.208	-6.69717	148.222	5.65683
12.5066	0.09055	71.055	0.41236	103.241	-6.76239	148.256	5.62698
12.5396	-1.22285	71.156	0.83297	103.276	-6.67569	148.29	5.47647
12.5716	-4.02259	71.19	1.3555	103.31	-6.6062	148.324	5.27283
12.6385	-4.06063	71.2901	1.72723	103.344	-6.63806	148.358	5.25653
12.6705	-4.22004	71.3231	1.98166	103.379	-6.62369	148.392	5.25946
12.7025	-4.03318	71.4241	3.6326	103.412	-6.49884	148.426	5.09479
12.7345	-3.9867	71.4914	3.00929	103.447	-6.50208	148.461	5.00745
12.7675	-3.82425	71.5914	3.29366	103.482	-6.55847	148.495	5.0687
12.7995	-3.70127	71.6255	4.23609	103.515	-6.46085	148.53	5.00882
12.8325	-3.71859	71.7265	4.5367	103.548	-6.39212	148.563	4.86429
12.8655	-3.59033	71.7605	4.16138	103.582	-6.46997	148.597	4.90878
12.8975	-3.59335	71.8595	11.6158	103.617	-6.42249	148.631	4.93896
12.9295	-3.57797	71.8935	13.5493	103.651	-6.3125	148.665	4.80249
12.9625	-3.47403	71.998	13.5759	103.685	-6.35941	148.7	4.77316
12.9945	-3.52387	72.032	13.1836	103.72	-6.37402	148.734	4.86227
13.0275	-3.45684	72.133	12.2124	103.754	-6.25644	148.768	4.78174
13.0595	-3.40015	72.201	12.6152	103.787	-6.24417	148.802	4.68271
13.0915	-3.44169	72.2351	11.4734	103.821	-6.30981	148.836	4.76309
13.1235	-3.34202	72.3351	10.997	103.855	-6.2179	148.872	4.34442
13.1555	-3.40244	72.3691	11.5514	103.889	-6.08121	148.905	2.58466
13.1876	-3.35824	72.4704	10.8315	103.923	-0.29486	148.94	-1.55478
13.2196	-3.31783	72.5385	10.6539	103.957	8.03424	148.974	-9.18423
13.2528	-3.39816	72.5727	10.2166	103.991	11.2245	149.009	-13.9168
13.2848	-3.3181	72.6727	9.94618	104.025	12.169	149.043	-14.2175
13.3178	-3.33622	72.7057	10.9054	104.06	12.2755	149.077	-13.6625
13.3498	-3.33812	72.8057	10.7003	104.095	12.3576	149.112	-13.2098
13.3828	-3.23578	72.8397	10.148	104.128	12.3304	149.146	-13.0478
13.4148	1.3357	72.9398	6.66394	104.163	12.1448	149.181	-12.8773
13.4636	1.87942	72.9738	2.85684	104.197	12.0995	149.216	-12.6573
13.4966	1.9842	73.0748	0.70279	104.231	12.1541	149.249	-12.608
13.5286	1.99221	73.1248	1.51946	104.265	12.0388	149.284	-12.6691
13.5606	1.92581	73.2268	1.71762	104.299	11.9142	149.318	-12.5979
13.5936	1.71933	73.2939	1.36004	104.333	11.9631	149.353	-12.4829
13.6256	1.70356	73.3278	1.82055	104.369	11.9491	149.387	-12.5519
13.6576	1.56405	73.4279	2.06166	104.402	11.7686	149.422	-12.5976
13.6906	1.45092	73.4948	1.93133	104.437	11.7077	149.456	-12.5203
13.7236	1.46462	73.5288	2.09417	104.471	11.7684	149.49	-12.4959
13.7556	1.3163	73.6288	3.59994	104.506	11.6917	149.524	-12.598
13.7887	1.29323	73.6969	3.59723	104.541	11.5578	149.559	-12.5345
13.8207	1.28041	73.7979	4.03109	104.575	11.5795	149.593	-12.4599
13.8537	1.16045	73.8649	13.2126	104.609	11.6299	149.627	-12.5358
13.8857	1.21026	73.899	14.4356	104.644	11.5076	149.661	-12.5788
13.9177	1.12725	74	14.2667	104.679	11.4214	149.696	-12.4666
13.9507	1.07566	74.034	12.9728	104.713	11.4999	149.73	-12.4635
13.9837	1.12881	74.135	12.1643	104.747	11.4666	149.764	-12.5775
14.0157	1.02075	74.202	12.8934	104.781	11.3242	149.798	-12.5205
14.0487	1.03224	74.236	11.7038	104.815	11.3434	149.832	-12.4305
14.0807	1.04536	74.3361	11.2015	104.85	11.3996	149.867	-6.15234
14.1137	0.9461	74.3701	11.1476	104.884	11.2861	149.901	4.97321
14.1467	1.01344	74.4701	10.645	104.919	11.018	149.936	8.65088
14.1787	0.971	74.5384	10.8676	104.953	10.1572	149.97	9.13141
14.2117	0.90333	74.5724	10.1848	104.987	7.64374	150.005	8.34796
14.2446	0.98123	74.6714	9.96375	105.021	1.23956	150.04	7.62152
14.2776	0.90425	74.7054	10.9026	105.055	-3.53671	150.073	7.15814
14.3106	0.88707	74.8065	10.4036	105.089	-5.6962	150.108	6.6579
14.3426	0.94803	74.8405	10.561	105.123	-6.47516	150.142	6.23636
14.3756	0.84966	74.9415	6.92502	105.158	-6.74435	150.176	6.07831
14.4077	0.87956	75.0105	0.48392	105.192	-6.69925	150.21	5.89322
14.4406	0.81435	75.0602	1.05971	105.225	-6.73163	150.244	5.608
14.4727	0.55604	75.1592	1.61528	105.26	-6.76877	150.278	5.52557
14.5047	0.21046	75.1932	1.384	105.295	-6.67795	150.313	5.49982
14.5377	-1.06951	75.2952	1.83125	105.329	-6.57779	150.347	5.31427
14.5697	-4.00694	75.3293	1.98283	105.362	-6.63651	150.381	5.18234
14.6374	-4.06367	75.4303	3.42061	105.397	-6.60873	150.415	5.23508
14.6704	-4.15754	75.4969	3.90693	105.431	-6.48105	150.449	5.15387
14.7024	-4.03123	75.5979	3.92458	105.465	-6.50735	150.483	4.99298
14.7354	-3.98616	75.632	3.56608	105.499	-6.54654	150.517	5.02686
14.7674	-3.82619	75.733	3.81686	105.533	-6.42441	150.551	5.04324
14.8004	-3.72136	75.767	4.6286	105.567	-6.39145	150.585	4.88474
14.8334	-3.7213	75.868	10.4772	105.601	-6.46085	150.619	4.87076
14.8664	-3.60408	75.903	14.7534	105.634	-6.38431	150.653	4.94666
14.8984	-3.58447	76.004	14.8064	105.668	-6.28888	150.688	4.8447
14.9314	-3.60086	76.038	14.0976	105.703	-6.3371	150.722	4.75232
14.9644	-3.48392	76.1391	13.3268	105.737	-6.35095	150.756	4.84143
14.9964	-3.52276	76.1731	12.198	105.771	-6.2247	150.79	4.82794
15.0295	-3.47533	76.278	12.2682	105.805	-6.22012	150.824	4.6933
15.0625	-3.38251	76.312	11.3526	105.839	-6.28418	150.858	4.72241
15.0955	-3.43884	76.4131	10.9373	105.873	-6.19043	150.892	4.26422
15.1275	-3.36997	76.4471	11.5245	105.907	-6.00357	150.926	2.37225
15.1606	-3.33748	76.5491	10.6936	105.941	0.35541	150.962	-2.47403
15.1936	-3.39784	76.5831	11.5822	105.975	8.39264	150.996	-10.2516
15.2266	-3.318	76.6844	11.2712	106.009	11.3607	151.031	-14.1109
15.2586	-3.36398	76.7184	11.0556	106.043	12.2158	151.066	-14.2063
15.2906	-3.36983	76.8204	11.2571	106.079	12.3135	151.1	-13.6815
15.3236	-3.26725	76.8545	10.1181	106.112	12.4058	151.134	-13.1382
15.3566	-3.33768	76.9555	5.04507	106.147	12.3849	151.168	-12.9802
15.3896	-3.29231	77.0235	1.17728	106.181	12.2146	151.203	-12.9781
15.4216	-2.95603	77.0719	0.89487	106.215	12.1805	151.237	-12.844
15.4546	1.60699	77.173	1.35008	106.25	12.2404	151.271	-12.7226
15.5033	2.00235	77.207	1.67502	106.284	12.1439	151.305	-12.7816
15.5363	1.97499	77.309	1.86192	106.319	12.003	151.34	-12.7815
15.5694	1.95875	77.343	3.68124	106.353	12.0274	151.374	-12.6534
15.6023	1.87323	77.444	3.94179	106.388	12.0145	151.409	-12.658
15.6344	1.67191	77.478	3.94322	106.422	11.8452	151.443	-12.7273
15.6674	1.65453	77.5801	4.58174	106.455	11.8002	151.477	-12.6741
15.7004	1.5469	77.6141	3.87728	106.49	11.868	151.512	-12.5998
15.7324	1.41198	77.7152	4.23713	106.525	11.79	151.547	-12.6725
15.7644	1.43381	77.7492	4.20603	106.558	11.6582	151.582	-12.7098
15.7974	1.30304	77.8502	8.97861	106.594	11.682	151.616	-12.609
15.8304	1.26268	77.8842	14.3865	106.628	11.7331	151.65	-12.5916
15.8624	1.27299	77.9852	14.8395	106.662	11.6186	151.685	-12.6876
15.8954	1.14405	78.0202	14.9069	106.697	11.525	151.72	-12.6694
15.9284	1.16957	78.1203	13.9538	106.732	11.6022	151.753	-12.5592
15.9614	1.15314	78.1543	12.7658	106.765	11.5852	151.788	-12.6041
15.9944	1.04627	78.2553	12.2148	106.8	11.4406	151.822	-12.6804
16.0275	1.09113	78.2893	11.6547	106.835	11.4463	151.858	-11.9101
16.0605	1.06655	78.3903	11.1318	106.869	11.5135	151.892	-0.49887
16.0935	0.97583	78.4243	12.0046	106.903	11.3767	151.926	7.09641
16.1265	1.04522	78.5254	11.2841	106.937	10.748	151.96	9.03098
16.1605	0.99826	78.5594	11.6842	106.971	9.18204	151.995	8.90015
16.1925	0.9245	78.6604	11.382	107.006	4.71014	152.03	8.13773
16.2255	0.99833	78.6944	10.2647	107.04	-1.75537	152.064	7.36166
16.2585	0.92727	78.7964	10.5107	107.074	-4.93518	152.099	6.86151
16.2905	0.9053	78.8314	9.56852	107.109	-6.13165	152.134	6.58347
16.3235	0.96216	78.9317	7.09488	107.142	-6.51755	152.168	6.21384
16.3575	0.86985	78.9658	4.45897	107.177	-6.68738	152.202	5.90515
16.3895	0.89415	79.0678	0.25764	107.211	-6.61432	152.236	5.8316
16.4225	0.91316	79.1169	0.84658	107.245	-6.58746	152.27	5.69055
16.4555	0.75329	79.218	1.51285	107.279	-6.65967	152.304	5.44931
16.4886	0.63038	79.253	1.0827	107.313	-6.59244	152.338	5.41043
16.5216	0.17879	79.354	1.4373	107.348	-6.49173	152.371	5.39526
16.5546	-1.02894	79.422	3.06165	107.381	-6.54688	152.406	5.21341
16.5876	-4.02943	79.49	2.38119	107.416	-6.55569	152.44	5.12137
16.6543	-4.15643	79.591	2.73408	107.45	-6.43259	152.474	5.18777
16.6894	-4.07944	79.658	3.81496	107.485	-6.41495	152.509	5.10406
16.7224	-3.92987	79.692	3.11005	107.519	-6.47662	152.543	4.95981
16.7544	-3.90839	79.793	3.51215	107.554	-6.40982	152.577	5.01202
16.7874	-3.74675	79.827	3.61858	107.587	-6.31299	152.61	5.02176
16.8204	-3.68317	79.9281	13.6938	107.621	-6.37463	152.644	4.8699
16.8544	-3.69334	79.9621	14.8203	107.656	-6.37402	152.678	4.87735
16.8874	-3.58227	80.0631	13.7337	107.689	-6.25012	152.713	4.94504
16.9204	-3.56301	80.0971	13.3705	107.724	-6.26584	152.747	4.83829
16.9534	-3.58465	80.1981	12.8425	107.758	-6.31964	152.781	4.76349
16.9864	-3.47173	80.2322	11.7334	107.791	-6.21484	152.815	4.85934
17.0194	-3.46492	80.3342	11.6047	107.825	-6.16373	152.849	4.80301
17.0524	-3.4702	80.3682	11.0484	107.86	-6.24121	152.884	4.0145
17.0854	-3.35287	80.4692	10.6475	107.894	-6.18408	152.918	1.96423
17.1184	-3.38462	80.5042	11.295	107.927	-2.83282	152.952	-3.20416
17.1515	-3.39829	80.6082	10.2706	107.961	6.35382	152.987	-11.2315
17.1845	-3.30366	80.6432	11.1195	107.995	10.4898	153.021	-14.3436
17.2175	-3.36872	80.7443	10.6514	108.03	12.0864	153.055	-14.0878
17.2505	-3.36202	80.8128	9.94867	108.064	12.4053	153.09	-13.5474
17.2835	-3.29089	80.8468	9.98211	108.099	12.3265	153.124	-13.3095
17.3165	-3.38029	80.9468	7.20645	108.133	12.3386	153.158	-12.9305
17.3495	-3.31512	80.9819	4.78893	108.167	12.3543	153.193	-12.7275
17.3825	-3.25878	81.0819	1.01167	108.201	12.2079	153.228	-12.8087
17.4155	1.26492	81.1311	0.85696	108.235	12.119	153.262	-12.907
17.4649	1.88156	81.2376	1.92392	108.27	12.1696	153.296	-12.7407
17.4979	1.97844	81.3057	1.73301	108.305	12.1462	153.33	-12.6798
17.5309	1.95102	81.3397	3.53155	108.339	11.989	153.365	-12.7345
17.5639	1.91458	81.4077	2.81209	108.374	11.956	153.4	-12.7353
17.5969	1.69972	81.5107	3.23096	108.408	11.99	153.435	-12.6222
17.63	1.65336	81.5457	3.70021	108.443	11.8761	153.469	-12.6265
17.662	1.57748	81.6457	3.94886	108.477	11.7477	153.504	-12.7249
17.696	1.41754	81.7138	4.18837	108.511	11.7953	153.538	-12.6648
17.729	1.40063	81.7478	4.01332	108.546	11.8065	153.573	-12.5961
17.762	1.35926	81.8478	7.06498	108.58	11.6594	153.608	-12.6757
17.795	1.23228	81.8828	13.6715	108.614	11.6148	153.641	-12.7332
17.828	1.26048	81.9858	14.546	108.649	11.6956	153.676	-12.6079
17.861	1.20947	82.0198	14.8752	108.683	11.6197	153.71	-12.5877
17.894	1.11095	82.1209	13.8096	108.718	11.4915	153.745	-12.6887
17.928	1.16451	82.1548	13.2581	108.752	11.537	153.779	-12.6499
17.96	1.09429	82.2569	12.8692	108.786	11.5667	153.813	-12.5589
17.994	1.02194	82.2919	11.7367	108.821	11.4293	153.847	-12.4858
18.028	1.07834	82.3929	11.3629	108.855	11.3798	153.881	-3.07767
18.061	1.03467	82.4609	11.922	108.889	11.4629	153.915	6.36594
18.094	0.95864	82.5298	10.6576	108.923	11.2125	153.949	8.95764
18.1281	1.01808	82.5998	11.6949	108.957	10.1116	153.984	8.88095
18.1611	0.98122	82.6338	10.9038	108.992	7.60934	154.019	8.19745
18.1941	0.91317	82.7348	11.0022	109.026	1.28485	154.053	7.58392
18.2271	0.98637	82.7688	10.0658	109.06	-3.50754	154.086	6.94229
18.2591	0.91129	82.8718	9.70417	109.094	-5.68115	154.121	6.49042
18.2921	0.89099	82.9058	8.97465	109.128	-6.27463	154.155	6.29419
18.3251	0.95396	83.0099	0.61516	109.163	-6.56961	154.189	6.0108
18.3581	0.86071	83.0579	1.32245	109.197	-6.72336	154.223	5.72513
18.3911	0.87356	83.1593	1.75823	109.231	-6.65445	154.257	5.65509
18.4241	0.91333	83.2273	1.38535	109.265	-6.58926	154.291	5.57123
18.4581	0.75224	83.2613	2.01144	109.299	-6.66382	154.325	5.34573
18.4911	0.56297	83.3623	3.28754	109.333	-6.59659	154.359	5.28265
18.5241	0.17422	83.4293	2.88436	109.367	-6.48862	154.393	5.30344
18.5581	-1.23649	83.5323	3.4918	109.401	-6.52225	154.427	5.1532
18.5911	-4.0018	83.5663	3.51889	109.436	-6.54916	154.461	5.04745
18.6574	-4.08632	83.6684	3.69272	109.47	-6.42175	154.495	5.11523
18.7082	-3.97643	83.7024	4.5133	109.503	-6.39597	154.529	5.04123
18.734	-3.98487	83.8034	4.59842	109.537	-6.46542	154.563	4.90686
18.767	-3.75496	83.8714	11.7968	109.571	-6.38437	154.597	4.95941
18.801	-3.67702	83.9054	14.3446	109.605	-6.30515	154.632	4.97617
18.8345	-3.66811	84.0084	13.8299	109.639	-6.35361	154.666	4.83139
18.8855	-3.50089	84.0425	14.2663	109.673	-6.3371	154.7	4.82254
18.912	-3.52603	84.1445	13.0194	109.707	-6.22003	154.734	4.90643
18.945	-3.43476	84.1785	13.5134	109.742	-6.24548	154.767	4.80978
18.979	-3.46912	84.2795	12.809	109.776	-6.29102	154.802	4.72485
19.012	-3.44231	84.3145	12.1176	109.81	-6.16937	154.836	4.82242
19.046	-3.33385	84.4165	12.1159	109.844	-6.1366	154.87	4.59024
19.079	-3.36693	84.4515	11.0734	109.878	-6.20682	154.904	3.21091
19.113	-3.35485	84.5536	11.0841	109.911	-5.36285	154.938	0.19357
19.146	-3.27753	84.5876	10.433	109.945	3.20825	154.972	-6.87125
19.179	-3.32722	84.6896	10.1982	109.979	9.57468	155.006	-13.4869
19.212	-3.31873	84.7239	10.6378	110.014	11.6617	155.04	-14.3814
19.2457	-3.24786	84.8256	10.1152	110.048	12.3896	155.075	-13.8595
19.2797	-3.30855	84.8596	10.8247	110.082	12.4673	155.109	-13.3199
19.3127	-3.31648	84.9617	5.63642	110.117	12.3303	155.144	-13.1423
19.3457	-3.24305	84.9967	2.99591	110.151	12.3277	155.179	-12.9544
19.3788	-3.29478	85.0987	1.4357	110.185	12.3458	155.213	-12.7513
19.4128	-2.06147	85.1469	0.92002	110.22	12.1938	155.247	-12.7781
19.4468	1.81272	85.248	1.37841	110.255	12.1109	155.282	-12.8179
19.4958	1.94625	85.283	1.77541	110.289	12.1752	155.316	-12.6946
19.5458	2.01435	85.386	1.88571	110.323	12.1105	155.351	-12.6391
19.5712	1.87866	85.4201	3.64912	110.357	11.9331	155.385	-12.7196
19.6052	1.7936	85.4901	3.07866	110.391	11.9226	155.42	-12.6979
19.6392	1.60995	85.5911	3.59177	110.425	11.9472	155.454	-12.5914
19.6722	1.53234	85.6591	4.58441	110.46	11.8112	155.488	-12.6269
19.7063	1.51208	85.6931	4.28838	110.494	11.7131	155.522	-12.7084
19.7393	1.3633	85.7941	4.65668	110.529	11.7753	155.557	-12.6117
19.7723	1.31345	85.8621	10.3368	110.563	11.7458	155.591	-12.5641
19.8063	1.32629	85.8962	14.634	110.598	11.5945	155.625	-12.6653
19.8393	1.19852	85.9982	15.057	110.632	11.5859	155.66	-12.6607
19.8723	1.18563			110.666	11.6447	155.694	-12.5429
19.9053	1.20429			110.7	11.5303	155.728	-12.6016
19.9383	1.09074			110.735	11.43	155.763	-12.6769
19.9723	1.08434			110.769	11.5019	155.796	-12.5716
20.0053	1.11835			110.803	11.4872	155.831	-12.5293
20.0393	1.02133			110.838	11.3398	155.866	-10.1583
20.0923	0.9961			110.872	11.3379	155.9	2.19702
20.1183	0.95744			110.906	11.4066	155.935	8.00903
20.1523	0.97366			110.94	11.1999	155.97	9.14511
20.2034	0.98541			110.975	10.3245	156.004	8.5253
20.2294	0.98277			111.009	8.26929	156.038	7.86935
20.2804	0.90934			111.044	2.42465	156.072	7.31827
20.3063	0.96372			111.078	-3.02017	156.106	6.7276
20.3393	0.87806			111.113	-5.5361	156.14	6.36771
20.3733	0.87733			111.147	-6.31473	156.174	6.20032
20.4233	0.87758			111.181	-6.60748	156.208	5.91135
20.4503	0.7913			111.215	-6.73935	156.243	5.6618
20.4844	0.55636			111.25	-6.6713	156.276	5.62643
20.5174	-0.08623			111.283	-6.60559	156.31	5.51501
20.5514	-1.61371			111.317	-6.66757	156.344	5.30127
20.5844	-3.89901			111.352	-6.61191	156.378	5.28113
20.6523	-4.04029			111.385	-6.49564	156.412	5.28635
20.6853	-4.02724			111.419	-6.53555	156.446	5.11591
20.7193	-3.95422			111.454	-6.5466	156.481	5.05179
20.7524	-3.81946			111.488	-6.42642	156.515	5.12134
20.7854	-3.67807			111.522	-6.38849	156.548	5.01614
20.8194	-3.66848			111.557	-6.45865	156.583	4.90811
20.8534	-3.61681			111.59	-6.35654	156.616	4.98853
20.8864	-3.50851			111.625	-6.2883	156.651	4.96368
20.9194	-3.54629			111.659	-6.31351	156.685	4.83209
20.9525	-3.50084			111.694	-6.34186	156.72	4.84323
20.9865	-3.4			111.728	-6.22043	156.754	4.91916
21.0195	-3.43873			111.762	-6.19202	156.788	4.81738
21.0515	-3.38106			111.797	-6.26068	156.822	4.74243
21.0855	-3.30584			111.831	-6.19504	156.856	4.72543
21.1185	-3.36569			111.865	-6.09375	156.89	3.66586
21.1526	-3.32622			111.899	-6.14609	156.925	0.87424
21.1856	-3.26109			111.933	-5.81458	156.958	-5.63171
21.2196	-3.33069			111.967	1.94379	156.993	-12.8553
21.2526	-3.31003			112.002	9.24506	157.028	-14.4049
21.2866	-3.25304			112.037	11.521	157.062	-13.9871
21.3366	-3.33654			112.071	12.3084	157.097	-13.3778
21.3623	-3.27046			112.105	12.5271	157.131	-13.0734
21.3963	-3.29392			112.139	12.4258	157.165	-13.0437
21.4304	1.36243			112.174	12.295	157.199	-12.8948
21.4786	1.8225			112.208	12.3336	157.233	-12.7069
21.5126	2.00637			112.243	12.3034	157.268	-12.7213
21.5456	2.0208			112.276	12.138	157.303	-12.7756
21.5797	1.83064			112.312	12.1047	157.338	-12.681
21.6126	1.74453			112.346	12.1687	157.373	-12.5886
21.6457	1.68782			112.38	12.0596	157.407	-12.6877
21.6787	1.5032			112.414	11.9016	157.442	-12.6855
21.7287	1.48067			112.449	11.9322	157.476	-12.5762
21.7549	1.35686			112.483	11.9356	157.51	-12.5892
21.7879	1.37119			112.518	11.7878	157.545	-12.6881
21.8219	1.26328			112.552	11.7438	157.579	-12.6393
21.8549	1.18888			112.586	11.8184	157.614	-12.5346
21.8889	1.22788			112.62	11.7441	157.648	-12.6107
21.9219	1.14159			112.655	11.6139	157.683	-12.6655
21.9549	1.08272			112.689	11.6571	157.717	-12.5655
21.9889	1.12747			112.724	11.691	157.751	-12.5408
22.0229	1.07538			112.758	11.5616	157.786	-12.6464
22.0579	0.98975			112.792	11.5004	157.82	-12.6009
22.1079	1.05414			112.826	11.5841	157.855	-9.70441
22.1349	0.95967			112.861	11.5347	157.889	2.72415
22.168	1.02617			112.895	11.3996	157.922	8.06213
22.22	0.91491			112.93	11.354	157.957	9.22449
22.246	0.98864			112.965	10.7307	157.991	8.51941
22.28	0.88779			113	8.68646	158.026	7.61331
22.313	0.91455			113.034	3.26245	158.06	7.03732
22.347	0.95482			113.069	-2.41	158.094	6.68442
22.381	0.86262			113.102	-5.16803	158.128	6.25998
22.414	0.85621			113.137	-6.28763	158.162	5.95856
22.4481	0.83779			113.171	-6.54672	158.197	5.87665
22.4822	0.57129			113.205	-6.56625	158.23	5.68732
22.5162	0.0249			113.239	-6.64801	158.264	5.45316
22.5492	-1.33096			113.272	-6.65295	158.299	5.43167
22.5822	-3.93057			113.307	-6.521	158.332	5.38977
22.6497	-4.0179			113.341	-6.48264	158.367	5.19205
22.6837	-4.01147			113.375	-6.54623	158.4	5.15021
22.7337	-3.94085			113.409	-6.46399	158.435	5.19598
22.7597	-3.87634			113.444	-6.36548	158.469	5.06204
22.7937	-3.73315			113.477	-6.42203	158.502	4.96667
22.8268	-3.62777			113.511	-6.38483	158.536	5.04156
22.8618	-3.6253			113.545	-6.28976	158.571	4.99573
22.9118	-3.52639			113.579	-6.29004	158.605	4.85275
22.9374	-3.56548			113.613	-6.32962	158.639	4.88519
22.9704	-3.46414			113.648	-6.19754	158.674	4.94272
23.0204	-3.46178			113.681	-6.17477	158.708	4.82327
23.0466	-3.36271			113.715	-6.24164	158.742	4.7695
23.0806	-3.40313			113.749	-6.15973	158.776	4.86929
23.1306	-3.31898			113.784	-6.07809	158.811	4.81625
23.1563	-3.37029			113.818	-6.12598	158.844	4.70313
23.1903	-3.29475			113.852	-6.11523	158.879	4.56888
23.2414	-3.34273			113.885	-6.00745	158.912	3.37735
23.2674	-3.27673			113.92	-4.1337	158.947	0.18234
23.3014	-3.33396			113.954	5.04684	158.981	-6.89404
23.3524	-3.28265			113.987	10.2471	159.016	-13.3466
23.3774	-3.33032			114.021	12.0644	159.049	-14.3396
23.4284	1.56088			114.056	12.4009	159.083	-13.9514
23.4774	1.87425			114.09	12.4919	159.118	-13.3993
23.5284	2.05763			114.125	12.5565	159.152	-13.0147
23.5543	1.91643			114.159	12.4172	159.186	-12.9598
23.6053	1.7601			114.193	12.2924	159.221	-12.8489
23.6314	1.66731			114.227	12.3459	159.255	-12.6466
23.6654	1.58201			114.261	12.3394	159.29	-12.6784
23.6994	1.42314			114.296	12.1935	159.324	-12.708
23.7494	1.41141			114.331	12.1333	159.358	-12.5885
23.7757	1.29644			114.365	12.1761	159.392	-12.5487
23.8257	1.27832			114.4	12.0712	159.427	-12.6436
23.8523	1.23593			114.433	11.9359	159.461	-12.6277
23.9024	1.13389			114.468	11.9784	159.496	-12.511
23.9284	1.17503			114.502	11.9989	159.53	-12.5757
23.9634	1.08589			114.537	11.8689	159.564	-12.6506
23.9964	1.03052			114.571	11.7908	159.599	-12.5401
24.0304	1.08729			114.606	11.863	159.633	-12.493
24.0634	1.0253			114.64	11.833	159.668	-12.5997
24.0974	0.95927			114.675	11.686	159.702	-12.6007
24.1314	1.01839			114.709	11.6838	159.737	-12.4832
24.1654	0.99121			114.744	11.751	159.771	-12.5019
24.1984	0.90687			114.778	11.6509	159.805	-12.6038
24.2324	0.95853			114.813	11.5419	159.841	-12.3956
24.2834	0.9161			114.847	11.6068	159.875	-2.84778
24.309	0.9615			114.881	11.6122	159.909	6.38492
24.343	0.89305			114.916	11.4339	159.943	8.95505
24.394	0.89497			114.95	10.8734	159.978	9.08948
24.42	0.8172			114.984	9.28271	160.012	8.33264
24.453	0.77801			115.019	4.65701	160.046	7.52853
24.487	0.56784			115.053	-1.70605	160.08	7.04037
24.538	-0.69766			115.087	-4.79953	160.114	6.70364
24.565	-2.01617			115.121	-6.02701	160.149	6.27423
24.615	-4.11163			115.155	-6.44339	160.183	5.98602
24.6828	-4.01546			115.188	-6.53708	160.218	5.90833
24.7168	-4.02667			115.222	-6.49234	160.251	5.72641
24.7508	-3.82475			115.257	-6.54391	160.285	5.4902
24.7855	-3.74771			115.29	-6.54236	160.319	5.4635
24.8355	-3.68668			115.325	-6.41678	160.353	5.42368
24.8623	-3.64194			115.36	-6.39313	160.388	5.22449
24.9123	-3.52291			115.394	-6.44791	160.422	5.18005
24.9383	-3.56756			115.428	-6.35632	160.455	5.22498
24.9724	-3.47372			115.463	-6.25485	160.49	5.10156
25.0065	-3.41934			115.496	-6.30881	160.524	4.98447
25.0585	-3.44882			115.531	-6.28928	160.558	5.05597
25.0845	-3.37143			115.565	-6.17377	160.592	5.03244
25.1185	-3.40332			115.6	-6.15045	160.627	4.88455
25.1685	-3.29491			115.634	-6.21164	160.661	4.92175
25.1943	-3.33656			115.667	-6.11591	160.695	4.97385
25.2283	-3.2781			115.701	-6.03149	160.729	4.84885
25.2633	-3.33422			115.735	-6.09872	160.763	4.8075
25.3134	-3.30414			115.769	-6.06287	160.798	4.89545
25.3399	-3.35252			115.804	-5.94559	160.831	4.86322
25.3899	-3.23273			115.839	-5.95657	160.866	4.59613
25.4165	0.81953			115.873	-6.0036	160.9	3.56958
25.4655	1.73668			115.907	-5.75082	160.934	0.73627
25.5155	2.00093			115.94	1.05771	160.969	-6.1796
25.5435	1.95937			115.974	8.81073	161.003	-13.1241
25.5935	1.82091			116.009	11.5897	161.037	-14.2696
25.6198	1.67053			116.042	12.5884	161.071	-13.8031
25.671	1.60691			116.077	12.6806	161.105	-13.4848
25.697	1.46709			116.112	12.6003	161.14	-13.0816
25.747	1.41672			116.145	12.6307	161.174	-12.8197
25.7734	1.37151			116.18	12.5886	161.209	-12.796
25.8074	1.31684			116.214	12.4308	161.244	-12.7382
25.8414	1.19085			116.249	12.3962	161.279	-12.5952
25.8924	1.20828			116.284	12.4582	161.313	-12.5507
25.9184	1.10953			116.319	12.3619	161.347	-12.6565
25.9694	1.14832			116.352	12.2245	161.381	-12.565
25.9961	1.07274			116.387	12.2396	161.416	-12.4828
26.0473	1.06818			116.421	12.2286	161.45	-12.5659
26.0723	1.06573			116.455	12.0666	161.484	-12.5955
26.1063	1.02384			116.489	12.0178	161.518	-12.4827
26.1563	0.95799			116.524	12.0906	161.552	-12.487
26.1824	0.93196			116.558	12.0006	161.587	-12.5911
26.2334	0.97258			116.592	11.8781	161.621	-12.5392
26.2593	0.89126			116.626	11.9349	161.655	-12.4566
26.3113	0.96538			116.661	11.9415	161.69	-12.5518
26.3374	0.88626			116.695	11.7967	161.724	-12.588
26.3895	0.95291			116.729	11.7615	161.758	-12.4889
26.4156	0.89136			116.764	11.8282	161.793	-12.4819
26.4676	0.83473			116.799	11.779	161.827	-12.5779
26.4939	0.69246			116.833	11.6383	161.861	-11.6762
26.5473	-0.14078			116.868	11.6658	161.896	0.05319
26.5733	-1.42809			116.902	11.7168	161.929	7.28238
26.6254	-4.00113			116.937	11.5702	161.964	9.04187
26.6928	-4.00802			116.971	10.9645	161.998	8.83362
26.7428	-3.98761			117.005	9.42273	162.033	8.08084
26.7688	-3.8344			117.039	5.00586	162.067	7.32925
26.8028	-3.80619			117.073	-1.45618	162.102	6.85941
26.8539	-3.64574			117.108	-4.69659	162.137	6.57764
26.8802	-3.65796			117.141	-5.92841	162.171	6.22198
26.9303	-3.50583			117.175	-6.35632	162.205	5.91324
26.9563	-3.54677			117.21	-6.54477	162.24	5.81427
27.0083	-3.44757			117.244	-6.4021	162.275	5.71341
27.0343	-3.43379			117.278	-6.4487	162.31	5.49161
27.0683	-3.36298			117.312	-6.47775	162.344	5.37006
27.1194	-3.40742			117.347	-6.39053	162.378	5.39972
27.1454	-3.34921			117.381	-6.29803	162.412	5.27219
27.1794	-3.38013			117.415	-6.35251	162.446	5.1232
27.2304	-3.27184			117.449	-6.32861	162.48	5.17105
27.2564	-3.3262			117.483	-6.19485	162.514	5.1456
27.3074	-3.2872			117.518	-6.20804	162.548	4.9877
27.334	-3.28501			117.551	-6.24597	162.582	5.00418
27.385	-3.28975			117.585	-6.12997	162.616	5.06668
27.4113	-2.42667			117.62	-6.07343	162.651	4.93387
27.4654	2.00406			117.654	-6.13327	162.684	4.88434
27.5141	2.04537			117.688	-6.08301	162.718	4.97958
27.5481	2.0001			117.722	-5.96393	162.752	4.91251
27.6011	1.72383			117.756	-6.00195	162.786	4.80078
27.6271	1.69077			117.79	-6.02011	162.821	4.8757
27.6779	1.50266			117.824	-5.88684	162.855	4.89017
27.7035	1.44181			117.858	-5.87576	162.889	4.19885
27.7545	1.38886			117.892	-5.93735	162.924	2.2684
27.7805	1.27472			117.926	-3.33487	162.958	-2.3414
27.8315	1.29231			117.96	6.01819	162.991	-10.237
27.8571	1.19185			117.993	10.5898	163.026	-14.1767
27.9081	1.19045			118.028	12.2471	163.06	-14.051
27.9352	1.15394			118.063	12.7479	163.095	-13.4004
27.9882	1.10817			118.097	12.7383	163.129	-13.2678
28.0144	1.09384			118.132	12.6051	163.163	-13.0268
28.0654	1.01358			118.165	12.6246	163.198	-12.7697
28.0915	1.05803			118.2	12.6251	163.232	-12.7077
28.1418	0.93645			118.234	12.4697	163.266	-12.7193
28.1678	0.99161			118.268	12.4178	163.301	-12.5807
28.2199	0.90281			118.303	12.4807	163.335	-12.5205
28.2459	0.93265			118.337	12.3717	163.37	-12.6032
28.2799	0.87634			118.371	12.2081	163.404	-12.5823
28.3329	0.9489			118.405	12.2342	163.439	-12.479
28.3589	0.86188			118.44	12.2457	163.472	-12.5242
28.4119	0.92891			118.475	12.1057	163.507	-12.6005
28.4376	0.8218			118.509	12.0309	163.542	-12.5099
28.4896	0.64904			118.543	12.1069	163.575	-12.4602
28.5146	0.31937			118.578	12.0499	163.61	-12.5668
28.5657	-1.65216			118.611	11.9054	163.644	-12.5559
28.5917	-4.06298			118.646	11.9377	163.678	-12.4488
28.6597	-4.08599			118.68	11.9771	163.713	-12.5005
28.6937	-3.98233			118.715	11.8472	163.747	-12.5759
28.7447	-3.89206			118.749	11.766	163.781	-12.4799
28.7717	-3.79152			118.784	11.8385	163.816	-12.4355
28.8227	-3.74061			118.818	11.8235	163.85	-12.4685
28.8495	-3.60837			118.853	11.6771	163.884	-3.29849
28.8995	-3.61706			118.887	11.6703	163.918	6.3024
28.9255	-3.55342			118.921	11.6798	163.953	8.90994
28.9791	-3.52245			118.956	10.9278	163.986	8.91147
29.0033	-3.50406			118.99	8.94211	164.021	8.28558
29.0553	-3.38666			119.025	3.84784	164.055	7.63837
29.0813	-3.42599			119.059	-2.03598	164.089	6.9921
29.1313	-3.31798			119.093	-5.02512	164.123	6.6293
29.1582	-3.36417			119.126	-6.07642	164.158	6.41278
29.2112	-3.27731			119.161	-6.27872	164.192	6.07935
29.2372	-3.32176			119.195	-6.4736	164.226	5.84296
29.2882	-3.30382			119.229	-6.5051	164.26	5.80338
29.3139	-3.29049			119.263	-6.39243	164.294	5.64276
29.3651	-3.31384			119.297	-6.37836	164.328	5.43585
29.3911	-3.24658			119.331	-6.42441	164.362	5.43448
29.4431	1.67343			119.365	-6.31778	164.395	5.39893
29.4918	2.02885			119.399	-6.23871	164.43	5.21414
29.5268	2.01825			119.433	-6.30579	164.463	5.18997
29.5788	1.83336			119.467	-6.25223	164.498	5.23828
29.6041	1.72096			119.501	-6.13239	164.532	5.09821
29.6581	1.58445			119.535	-6.17325	164.565	5.02148
29.6831	1.47857			119.569	-6.18176	164.599	5.10861
29.7351	1.43529			119.605	-6.07571	164.634	5.03857
29.7613	1.30622			119.639	-6.01474	164.667	4.91592
29.8133	1.31941			119.673	-6.0795	164.702	4.98886
29.8383	1.22307			119.707	-6.01501	164.736	5.00189
29.8904	1.20879			119.74	-5.91962	164.77	4.85846
29.9154	1.17493			119.774	-5.95563	164.804	4.88071
29.9684	1.11817			119.808	-5.96951	164.838	4.95331
29.9944	1.10989			119.843	-5.84338	164.872	4.66965
30.0465	1.03387			119.877	-5.82736	164.907	3.47751
30.0724	1.07215			119.911	-5.64832	164.941	0.71011
30.1284	0.99886			119.945	1.60037	164.974	-6.2084
30.1535	1.02442			119.979	9.24759	165.009	-13.1207
30.2065	0.93637			120.014	11.7551	165.042	-14.2625
30.2326	0.99394			120.048	12.58	165.077	-13.7396
30.2846	0.88752			120.082	12.8314	165.111	-13.3777
30.3106	0.955			120.116	12.7725	165.146	-13.1076
30.3636	0.85212			120.151	12.6033	165.18	-12.7873
30.3896	0.92683			120.185	12.623	165.214	-12.7433
30.4247	0.82443			120.219	12.6371	165.249	-12.7693
30.4597	0.73521			120.253	12.4817	165.283	-12.7112
30.4937	0.56406			120.288	12.4058	165.318	-12.582
30.5458	-0.87405			120.322	12.4664	165.353	-12.6251
30.5718	-2.08955			120.357	12.382	165.387	-12.7036
30.6238	-4.02038			120.392	12.2021	165.421	-12.5478
30.6908	-3.95951			120.426	12.1965	165.456	-12.5334
30.7448	-3.92426			120.46	12.233	165.49	-12.6407
30.7708	-3.77036			120.494	12.1002	165.524	-12.5939
30.8228	-3.71465			120.529	11.9984	165.558	-12.4949
30.8498	-3.61251			120.563	12.0598	165.593	-12.5643
30.9018	-3.57556			120.597	12.0139	165.627	-12.617
30.9278	-3.52246			120.632	11.8535	165.662	-12.5085
30.9798	-3.49648			120.665	11.853	165.696	-12.4999
31.0058	-3.45065			120.7	11.8891	165.731	-12.5983
31.0578	-3.38351			120.735	11.7522	165.765	-12.5636
31.0837	-3.40746			120.768	11.6338	165.8	-12.4673
31.1347	-3.29654			120.803	11.6826	165.835	-12.5158
31.1607	-3.3578			120.837	11.6432	165.869	-9.64999
31.2138	-3.25809			120.872	11.4801	165.904	2.86859
31.2395	-3.32823			120.906	11.4731	165.938	8.20923
31.2915	-3.26602			120.94	11.5035	165.972	9.18018
31.3165	-3.2901			120.975	10.872	166.007	8.59421
31.3696	-3.26375			121.009	9.15622	166.041	7.97632
31.3956	-3.23046			121.044	4.83728	166.075	7.32285
31.4476	1.53008			121.078	-1.52969	166.109	6.7688
31.4959	1.94394			121.112	-4.87933	166.143	6.50793
31.5479	2.00961			121.146	-6.13763	166.177	6.26486
31.5743	1.97361			121.179	-6.397	166.211	5.92712
31.6283	1.73316			121.214	-6.53354	166.245	5.79416
31.6544	1.71162			121.248	-6.56387	166.279	5.73926
31.7064	1.50553			121.282	-6.49429	166.313	5.53275
31.7324	1.51766			121.316	-6.51453	166.347	5.39008
31.7874	1.34949			121.35	-6.5365	166.381	5.42496
31.8141	1.36105			121.384	-6.41766	166.416	5.31888
31.8661	1.1955			121.418	-6.33432	166.45	5.16132
31.8911	1.23577			121.452	-6.38129	166.484	5.20233
31.9441	1.11042			121.486	-6.33191	166.518	5.19302
31.9701	1.16054			121.52	-6.21198	166.551	5.03149
32.0242	1.04094			121.555	-6.22592	166.585	5.04047
32.0502	1.09181			121.589	-6.25479	166.619	5.09735
32.1033	0.98402			121.624	-6.14526	166.653	4.96378
32.1294	1.01612			121.658	-6.06845	166.687	4.90903
32.1814	0.95855			121.691	-6.13174	166.721	5.00552
32.2075	0.96968			121.726	-6.0882	166.755	4.93555
32.2605	0.96098			121.76	-5.96799	166.789	4.82788
32.2865	0.93998			121.794	-6.00278	166.823	4.90619
32.3395	0.98335			121.828	-6.01962	166.858	4.92316
32.365	0.93666			121.862	-5.89114	166.891	4.38733
32.417	0.99677			121.895	-5.87866	166.926	2.7984
32.4427	0.86857			121.93	-2.72711	166.96	-1.10242
32.4957	0.62684			121.964	6.64908	166.994	-8.83282
32.5217	0.11233			121.998	10.8909	167.028	-13.9168
32.5737	-2.04849			122.033	12.2673	167.063	-14.0729
32.5997	-3.87587			122.067	12.5629	167.097	-13.5023
32.6665	-4.00874			122.101	12.7019	167.131	-13.2926
32.7195	-3.92247			122.136	12.623	167.166	-12.9828
32.7459	-3.86356			122.171	12.4393	167.2	-12.7127
32.7989	-3.70144			122.205	12.4308	167.235	-12.6812
32.8238	-3.68743			122.239	12.4786	167.269	-12.7725
32.8768	-3.55472			122.274	12.346	167.304	-12.6361
32.9028	-3.58211			122.307	12.2368	167.338	-12.5444
32.9558	-3.44482			122.343	12.2824	167.373	-12.6679
32.9817	-3.49422			122.377	12.2538	167.407	-12.625
33.0347	-3.35127			122.412	12.0721	167.441	-12.5051
33.0607	-3.39524			122.447	12.0224	167.476	-12.5605
33.114	-3.28404			122.481	12.085	167.51	-12.6252
33.1391	-3.32952			122.515	11.9819	167.544	-12.5317
33.1921	-3.2654			122.55	11.8498	167.578	-12.4827
33.2179	-3.27547			122.628	11.7593	167.613	-12.5521
33.2719	-3.26873			122.663	11.825	167.649	-12.595
33.297	-3.26474			122.697	11.8211	167.682	-12.4834
33.35	-3.26952			122.731	11.6714	167.717	-12.4792
33.3758	-3.23677			122.766	11.6519	167.751	-12.585
33.4288	1.19459			122.8	11.7334	167.785	-12.5317
33.4768	1.83674			122.834	11.6476	167.82	-12.4392
33.5298	2.04006			122.869	11.5309	167.855	-12.4638
33.5558	2.00205			122.903	11.5939	167.889	-3.75974
33.6088	1.75286			122.937	11.4247	167.923	6.19757
33.6348	1.72658			122.972	10.3016	167.957	9.04791
33.6879	1.50647			123.006	7.70657	167.991	9.09729
33.7149	1.51044			123.04	1.37857	168.026	8.4256
33.7669	1.31421			123.074	-3.34964	168.059	7.78882
33.7923	1.34472			123.108	-5.56607	168.094	7.12415
33.8454	1.18822			123.143	-6.11975	168.128	6.6799
33.8713	1.23389			123.176	-6.35352	168.162	6.47217
33.9074	1.13277			123.21	-6.45749	168.196	6.17029
33.9594	1.11011			123.244	-6.38907	168.231	5.88797
33.9863	1.0441			123.278	-6.29385	168.265	5.82718
34.0383	1.06197			123.312	-6.3421	168.298	5.71268
34.0653	0.98542			123.346	-6.31934	168.332	5.48712
34.1183	1.02169			123.381	-6.18365	168.366	5.43887
34.1442	0.94039			123.415	-6.19641	168.401	5.44165
34.1972	1.00275			123.448	-6.22784	168.434	5.27444
34.2232	0.9166			123.482	-6.10779	168.469	5.18491
34.2762	0.98007			123.516	-6.06165	168.503	5.25009
34.3013	0.90694			123.55	-6.12311	168.536	5.15219
34.3543	0.95331			123.585	-6.04932	168.571	5.02402
34.3803	0.87905			123.619	-5.93448	168.604	5.09048
34.4334	0.90747			123.652	-6.00748	168.639	5.07483
34.4594	0.80912			123.686	-5.99493	168.673	4.936
34.5114	0.4326			123.72	-5.86713	168.707	4.93777
34.5374	0.01585			123.754	-5.87979	168.742	5.01425
34.5915	-3.79448			123.788	-5.92853	168.776	4.91058
34.6594	-3.87964			123.823	-5.81598	168.81	4.83282
34.7124	-4.01505			123.857	-5.76685	168.843	4.93188
34.7384	-3.91601			123.891	-5.83691	168.878	4.80365
34.7914	-3.76735			123.925	-4.58917	168.912	3.7186
34.8174	-3.65577			123.959	4.57504	168.946	1.27216
34.8694	-3.60148			123.992	10.2576	168.98	-4.87445
34.8954	-3.52681			124.027	12.1269	169.014	-12.4871
34.9484	-3.51596			124.061	12.7043	169.048	-14.3649
34.9754	-3.43055			124.096	12.7689	169.083	-13.8568
35.0294	-3.42776			124.131	12.6099	169.117	-13.3834
35.0544	-3.35016			124.164	12.5715	169.152	-13.1979
35.1074	-3.37611			124.199	12.6109	169.186	-12.8518
35.1334	-3.29745			124.234	12.5135	169.22	-12.7854
35.1868	-3.35196			124.269	12.3554	169.254	-12.8535
35.2131	-3.27095			124.303	12.3749	169.289	-12.7923
35.2651	-3.35143			124.337	12.3889	169.324	-12.6453
35.291	-3.29187			124.372	12.2044	169.358	-12.6478
35.344	-3.33506			124.406	12.1089	169.392	-12.7234
35.37	-3.28119			124.441	12.1574	169.426	-12.6418
35.423	0.79055			124.475	12.1031	169.46	-12.5618
35.472	1.71799			124.51	11.9449	169.494	-12.6565
35.525	1.99007			124.544	11.9528	169.529	-12.6713
35.551	1.9777			124.579	12.0019	169.564	-12.5645
35.604	1.74268			124.612	11.8686	169.599	-12.5527
35.63	1.69245			124.647	11.7726	169.633	-12.657
35.6831	1.50688			124.682	11.831	169.668	-12.6262
35.7091	1.44996			124.716	11.8246	169.703	-12.5187
35.7621	1.34347			124.751	11.688	169.736	-12.5732
35.7881	1.28221			124.787	11.6146	169.771	-12.6456
35.8401	1.24191			124.821	11.6888	169.805	-12.5469
35.8661	1.16205			124.856	11.6678	169.839	-12.5039
35.9201	1.16247			124.89	11.5194	169.874	-9.23224
35.9459	1.07603			124.924	11.5165	169.908	3.2262
35.9989	1.10268			124.959	11.2563	169.943	8.37924
36.0249	1.00968			124.994	9.87894	169.977	9.35928
36.0789	1.06025			125.029	6.32715	170.011	8.6821
36.1039	0.97312			125.063	-0.32031	170.046	8.00089
36.1569	1.02748			125.097	-4.09329	170.08	7.40182
36.1823	0.94556			125.131	-5.81451	170.113	6.79761
36.2353	0.99461			125.165	-6.22012	170.148	6.46887
36.2614	0.92732			125.198	-6.34338	170.182	6.27921
36.3154	0.96164			125.232	-6.44064	170.216	5.96332
36.3414	0.90567			125.266	-6.41916	170.25	5.74188
36.3954	0.93694			125.301	-6.31522	170.284	5.7117
36.4209	0.86527			125.335	-6.28757	170.318	5.56943
36.4755	0.76449			125.369	-6.33002	170.352	5.36911
36.5019	0.49707			125.403	-6.26038	170.386	5.37079
36.5566	-1.00529			125.438	-6.15179	170.421	5.34952
36.5812	-3.76577			125.471	-6.2157	170.455	5.18301
36.6495	-3.81237			125.506	-6.18851	170.49	5.12576
36.7051	-3.95044			125.54	-6.06097	170.524	5.19171
36.7323	-3.89864			125.573	-6.07129	170.558	5.08453
36.7856	-3.71502			125.607	-6.12524	170.591	4.97781
36.8122	-3.57924			125.641	-5.99695	170.626	5.05991
36.8655	-3.55396			125.675	-5.94583	170.659	5.02969
36.8916	-3.48156			125.71	-6.00293	170.693	4.88898
36.9462	-3.46275			125.744	-5.9339	170.727	4.93735
36.9727	-3.373			125.778	-5.84009	170.761	4.98386
37.026	-3.38554			125.812	-5.88272	170.795	4.85156
37.0515	-3.30703			125.846	-5.89465	170.829	4.83057
37.1055	-3.30595			125.88	-5.76361	170.863	4.89157
37.1311	-3.24622			125.914	-5.55362	170.898	4.12256
37.1851	-3.27816			125.949	1.59122	170.932	1.97015
37.2112	-3.22394			125.982	9.18381	170.966	-3.04892
37.2652	-3.26482			126.017	11.8279	171	-10.9145
37.2898	-3.2487			126.052	12.5084	171.034	-14.2626
37.343	-3.2576			126.085	12.5927	171.069	-14.0475
37.37	-3.23678			126.121	12.6763	171.103	-13.3932
37.4243	-2.70008			126.154	12.595	171.138	-13.1997
37.4501	1.59373			126.189	12.4214	171.172	-13.0062
37.4992	1.93816			126.223	12.4189	171.207	-12.7762
37.5542	1.99868			126.258	12.45	171.241	-12.6253
37.5802	1.88163			126.291	12.3057	171.275	-12.689
37.6342	1.72719			126.326	12.1945	171.31	-12.6529
37.6603	1.61033			126.361	12.2324	171.345	-12.5163
37.7343	1.45197			126.395	12.1684	171.379	-12.5247
37.7593	1.39934			126.429	12.0065	171.414	-12.6098
37.8323	1.26152			126.464	11.9927	171.448	-12.5507
37.8583	1.2543			126.498	12.0517	171.483	-12.465
37.9323	1.13117			126.532	11.9341	171.518	-12.5341
37.9573	1.1557			126.566	11.8278	171.552	-12.6034
38.0138	1.10044			126.6	11.8938	171.586	-12.4824
38.0404	1.07067			126.635	11.8872	171.621	-12.4586
38.0944	1.05027			126.67	11.7469	171.655	-12.5813
38.1204	1.01843			126.705	11.7051	171.688	-12.5274
38.1734	0.99487			126.739	11.7842	171.723	-12.4224
38.1994	0.98893			126.774	11.7189	171.757	-12.4982
38.2534	0.95701			126.808	11.5872	171.791	-12.5474
38.2794	0.96248			126.843	11.6069	171.826	-12.4303
38.3335	0.92505			126.878	11.6651	171.86	-12.1935
38.3597	0.93385			126.911	11.5486	171.895	-1.97577
38.4133	0.89919			126.946	11.2313	171.929	6.80246
38.4389	0.90304			126.98	10.2624	171.963	9.28812
38.4929	0.69064			127.014	7.46246	171.998	9.14651
38.5189	0.47045			127.049	0.7735	172.033	8.30649
38.5729	-1.27973			127.082	-3.59598	172.067	7.7088
38.5988	-3.77595			127.117	-5.50873	172.101	7.17938
38.6653	-3.83772			127.151	-6.18262	172.135	6.64713
38.7193	-3.96688			127.185	-6.4548	172.169	6.3703
38.7454	-3.90588			127.219	-6.34543	172.203	6.20938
38.7995	-3.61752			127.254	-6.41052	172.237	5.9122
38.8257	-3.6237			127.287	-6.40936	172.271	5.72272
38.8797	-3.4618			127.321	-6.29022	172.305	5.70566
38.9047	-3.50893			127.355	-6.25418	172.34	5.55469
38.9587	-3.3692			127.389	-6.30618	172.374	5.36966
38.9843	-3.41749			127.423	-6.23697	172.407	5.38705
39.0374	-3.29709			127.456	-6.12534	172.442	5.35544
39.0645	-3.34636			127.491	-6.18613	172.476	5.17911
39.1185	-3.23593			127.525	-6.17163	172.51	5.17151
39.1446	-3.30239			127.558	-6.02863	172.544	5.2178
39.1986	-3.21146			127.593	-6.03827	172.577	5.07843
39.2246	-3.26095			127.626	-6.06808	172.611	5.0152
39.2786	-3.18924			127.66	-5.96286	172.645	5.10345
39.3046	-3.26093			127.695	-5.91708	172.679	5.02258
39.3595	-3.18205			127.729	-5.97894	172.713	4.9137
39.3846	-3.2422			127.764	-5.92148	172.747	4.99326
39.4386	1.49362			127.798	-5.82129	172.781	4.99814
39.4875	1.82611			127.831	-5.85876	172.815	4.85754
39.5425	1.97153			127.865	-5.86707	172.849	4.88092
39.5675	1.84257			127.899	-5.74844	172.883	4.73291
39.6225	1.68764			127.934	-5.66968	172.918	3.3418
39.6491	1.56841			127.968	0.70316	172.951	0.12756
39.7022	1.4594			128.002	8.83862	172.986	-6.9693
39.7292	1.36679			128.036	11.7889	173.02	-13.373
39.7842	1.27348			128.071	12.5748	173.054	-14.3248
39.8112	1.23298			128.105	12.6693	173.088	-13.7663
39.8672	1.14517			128.139	12.7534	173.123	-13.2435
39.8922	1.15586			128.173	12.6709	173.157	-13.0908
39.9462	1.06647			128.208	12.4783	173.192	-13.001
39.9712	1.06602			128.242	12.4548	173.226	-12.7636
40.0252	1.00623			128.277	12.4891	173.261	-12.6933
40.0513	1.00924			128.311	12.3459	173.295	-12.7289
40.1093	0.9564			128.345	12.2378	173.33	-12.6411
40.1363	1.02626			128.38	12.2924	173.363	-12.5497
40.1903	0.92429			128.414	12.215	173.398	-12.5971
40.2163	0.99368			128.448	12.0373	173.433	-12.6533
40.2703	0.8947			128.483	12.0034	173.468	-12.5393
40.2963	0.96352			128.517	12.0576	173.502	-12.4907
40.3493	0.86693			128.551	11.9299	173.536	-12.6073
40.3757	0.93559			128.586	11.819	173.57	-12.5833
40.4297	0.84697			128.62	11.8802	173.604	-12.4728
40.4563	0.86874			128.654	11.8648	173.639	-12.5384
40.5104	0.42795			128.689	11.7076	173.674	-12.6025
40.5363	0.0813			128.724	11.6864	173.708	-12.5072
40.5904	-3.80563			128.758	11.7526	173.743	-12.4493
40.6584	-3.77976			128.792	11.6583	173.777	-12.5626
40.7135	-3.98382			128.826	11.5298	173.811	-12.5429
40.7395	-3.85128			128.861	11.5826	173.846	-12.4304
40.7925	-3.65479			128.895	11.5983	173.88	-8.35342
40.8195	-3.55267			128.93	11.3632	173.914	4.00415
40.8735	-3.4994			128.964	10.5974	173.949	8.58069
40.8995	-3.44256			128.997	8.6225	173.983	9.4892
40.9535	-3.40916			129.032	3.03241	174.018	8.73682
40.9802	-3.37186			129.066	-2.57178	174.053	7.93146
				129.101	-5.12317	174.088	7.41934
				129.135	-6.06216	174.121	6.94211
				129.168	-6.39441	174.155	6.46857
				129.202	-6.43365	174.189	6.26035
				129.237	-6.32993	174.223	6.10754
				129.271	-6.35632	174.258	5.82806
				129.305	-6.38129	174.292	5.66046
				129.339	-6.2384	174.326	5.66101
				129.373	-6.22275	174.36	5.51276
				129.407	-6.27451	174.394	5.336
				129.441	-6.17746	174.428	5.36462
				129.475	-6.10846	174.462	5.32782
				129.509	-6.14124	174.497	5.15347
				129.543	-6.12436	174.531	5.16122
				129.578	-6.00241	174.564	5.20383
				129.612	-6.02026	174.598	5.05786
				129.646	-6.03281	174.632	5.00763
				129.681	-5.93616	174.666	5.09427
				129.714	-5.88049	174.7	5.00525
				129.749	-5.9324	174.734	4.90091
				129.783	-5.88962	174.768	4.97565
				129.817	-5.78235	174.803	4.98529
				129.852	-5.79755	174.837	4.84952
				129.886	-5.83667	174.871	4.84293
				129.921	-5.74402	174.905	4.28146
				129.955	-4.56274	174.939	2.2251
				129.99	4.36819	174.973	-2.75122
				130.023	10.2353	175.007	-10.561
				130.058	12.3217	175.042	-14.1563
				130.091	12.7809	175.076	-14.1253
				130.126	12.7256	175.11	-13.5121
				130.161	12.7636	175.144	-13.141
				130.195	12.739	175.179	-12.9793
				130.229	12.5603	175.213	-12.8559
				130.264	12.483	175.248	-12.6587
				130.298	12.538	175.282	-12.6084
				130.332	12.4441	175.316	-12.666
				130.366	12.2873	175.351	-12.6004
				130.401	12.3016	175.385	-12.4769
				130.435	12.2889	175.419	-12.5633
				130.47	12.1167	175.454	-12.6065
				130.504	12.04	175.489	-12.5037
				130.538	12.1109	175.523	-12.4627
				130.572	12.0294	175.557	-12.5668
				130.606	11.8881	175.592	-12.5257
				130.64	11.9286	175.625	-12.4251
				130.675	11.9551	175.66	-12.4898
				130.709	11.8103	175.695	-12.5486
				130.744	11.7532	175.729	-12.4435
				130.778	11.8317	175.763	-12.4256
				130.812	11.7699	175.797	-12.541
				130.847	11.6298	175.831	-12.4948
				130.881	11.6659	175.866	-12.1849
				130.915	11.7087	175.901	-2.02649
				130.95	11.4787	175.934	6.73279
				130.985	10.6302	175.968	9.23871

## Sheet: Fig. 4i
x-axis-Time (s)	y-axis-Output Current (nA)	x-axis-Time (s)	y-axis-Output Current (nA)	x-axis-Time (s)	y-axis-Output Current (nA)	x-axis-Time (s)	y-axis-Output Current (nA)
P-PLA		MRSD-PLA2		MRSD-PLA4		MRSD-PLA6
0	7.29574	45	0.0324	90	0.03149	135	0.07105
0.03431	6.31849	45.0358	0.06355	90.0351	0.0573	135.034	0.12687
0.07913	1.37038	45.0732	0.12994	90.082	0.18429	135.074	0.06469
0.1261	-0.18997	45.1155	0.10596	90.1281	0.04127	135.114	-0.24556
0.16611	-0.58935	45.1576	0.14109	90.1677	0.08015	135.156	0.14018
0.20612	-0.05639	45.2016	0.23215	90.2069	0.23806	135.201	0.3771
0.24625	0.16655	45.2416	0.18986	90.2457	0.152	135.24	0.1379
0.29238	0.57923	45.2816	0.1852	90.286	11.5162	135.279	0.19065
0.33793	-0.35323	45.322	0.19611	90.3249	33.4674	135.318	0.23397
0.37832	-0.54445	45.368	0.14188	90.3659	9.61847	135.357	0.22874
0.41701	-0.29058	45.4132	0.11175	90.4099	1.99816	135.395	-0.25125
0.45607	-0.21078	45.4521	0.12369	90.4489	0.52489	135.438	0.29866
0.5022	0.33458	45.4902	0.19338	90.489	0.2143	135.481	0.17144
0.54793	0.18576	45.5311	0.12938	90.529	0.14609	135.52	0.27012
0.58794	0.17064	45.5696	0.17076	90.575	0.14722	135.559	0.25443
0.62795	0.12528	45.609	0.1229	90.621	0.29559	135.6	0.17326
0.6682	0.12324	45.6518	20.8703	90.662	0.27603	135.638	0.26421
0.7134	0.12255	45.6951	15.1307	90.7007	0.24431	135.678	29.3906
0.7578	0.2309	45.7352	5.44969	90.7399	0.17724	135.72	47.4196
0.79849	0.2068	45.7742	1.08082	90.7785	-0.04479	135.764	12.4514
0.8375	0.22305	45.8142	0.23431	90.8181	0.1337	135.804	2.0658
0.87782	0.15916	45.8605	0.16632	90.8581	0.09925	135.845	0.70361
0.92339	0.21168	45.9058	0.17383	90.9031	0.29956	135.884	0.37198
0.9686	0.12597	45.9448	0.19145	90.9425	0.28763	135.924	0.17644
1.00813	0.00659	45.9852	0.18667	90.9814	0.27717	135.964	0.08697
1.04734	-0.20327	46.0258	0.11221	91.022	0.36334	136.007	0.0847
1.08635	-0.33504	46.0719	0.17303	91.0614	0.13688	136.051	0.02342
1.12506	-8.24025	46.1162	0.103	91.1017	0.28433	136.089	0.08401
1.16463	-7.50299	46.1558	0.1063	91.1418	0.25182	136.129	0.05844
1.20974	-2.99997	46.195	0.06764	91.1839	0.28797	136.171	0.26694
1.25206	-0.55434	46.2331	0.07014	91.223	0.29581	136.218	0.26216
1.29092	-0.11028	46.2732	0.07981	91.2617	0.33913	136.263	0.18599
1.32993	0.18485	46.3141	0.13688	91.3004	-0.65484	136.303	0.19736
1.36872	0.08242	46.3592	0.11084	91.3386	-3.93641	136.342	0.21089
1.40916	0.12528	46.4046	0.14995	91.3786	-18.1612	136.381	0.25886
1.44817	0.03331	46.4433	0.15643	91.4226	-18.7429	136.42	0.21828
1.49099	0.01728	46.4823	0.15484	91.4676	-7.80892	136.459	0.18792
1.53306	0.0897	46.5203	0.11858	91.5069	-1.35708	136.501	0.31321
1.57234	0.0955	46.5588	0.11255	91.5466	-0.87232	136.545	0.12392
1.61198	0.12835	46.5979	0.12176	91.5856	-0.30741	136.584	0.26796
1.65099	0.13279	46.6424	-1.46292	91.6307	-0.19054	136.623	0.20157
1.69099	0.20816	46.6861	-7.36372	91.6771	0.09436	136.664	0.04809
1.73044	0.32207	46.7261	-23.5181	91.7167	0.19827	136.71	-3.74939
1.77294	0.18076	46.7661	-7.57905	91.756	0.10618	136.755	-15.5719
1.81753	0.20543	46.8064	-2.5932	91.796	0.19293	136.796	-43.5205
1.85654	0.24284	46.8519	-0.66188	91.8354	0.03081	136.836	-19.6333
1.89786	0.19531	46.8987	-0.27217	91.874	0.08197	136.877	-4.53474
1.93619	0.1578	46.9377	-0.45247	91.9167	0.0814	136.922	-1.66324
1.98197	2.37799	46.9759	-0.1163	91.9592	0.17326	136.967	-0.59015
2.02694	10.2843	47.0147	0.01933	91.9993	0.14268	137.007	-0.2392
2.06495	1.50874	47.0547	0.02046	92.0376	0.10277	137.047	-0.13267
2.10512	0.62539	47.0937	0.049	92.0775	0.08561	137.087	-0.06048
2.14386	0.17155	47.1352	0.06207	92.1162	0.17235	137.133	0.08617
2.18441	0.11983	47.1804	0.0756	92.1559	0.05605	137.18	0.02569
2.2227	0.08458	47.2199	0.09311	92.1981	0.02103	137.22	-0.11255
2.2656	0.09743	47.26	0.02001	92.2417	0.20214	137.258	0.06082
2.3101	0.07822	47.2996	0.05195	92.2819	2.96518	137.298	-0.09084
2.35011	0.05616	47.3459	0.1113	92.3223	37.713	137.344	0.01364
2.38899	0.04798	47.391	0.06173	92.3623	8.95943	137.389	-0.471
2.429	0.12858	47.43	0.07128	92.4083	2.26112	137.428	-0.53853
2.47602	0.19804	47.471	0.09334	92.4545	0.38938	137.468	-1.09958
2.52139	0.16382	47.5099	0.16144	92.4938	0.0972	137.508	-0.25977
2.56196	0.11585	47.5512	0.13858	92.5328	0.00716	137.548	-0.25693
2.59984	0.13586	47.5902	0.14438	92.5724	0.19497	137.589	-0.26796
2.63883	0.1321	47.6308	11.9795	92.6194	0.19418	137.629	-0.07492
2.67846	0.13131	47.6743	24.1386	92.6634	0.27251	137.672	0.07958
2.71747	0.12483	47.7128	7.68091	92.7019	0.25716	137.712	63.3714
2.75948	0.20293	47.7536	1.87595	92.7419	0.07151	137.752	26.1275
2.80256	0.08652	47.7926	0.38915	92.7827	0.15257	137.791	6.91318
2.84088	0.12835	47.8386	0.09572	92.8214	0.15916	137.837	1.47656
2.88231	0.06935	47.8829	0.14609	92.8607	0.2027	137.883	0.41575
2.92132	0.0482	47.9226	0.10573	92.9039	0.22487	137.924	-0.000568434
2.96752	0.05991	47.9609	0.15336	92.9479	0.1379	137.963	0.0764
3.01459	-0.02558	48.0014	0.12642	92.9878	0.14495	137.997	0.06355
3.05499	-0.21862	48.0412	0.10323	93.0278	0.19656	138.036	0.08083
3.09462	-0.03126	48.0809	0.1437	93.0668	0.09504	138.076	0.17155
3.13463	-7.41954	48.1228	0.09663	93.1125	0.12278	138.121	-0.00341
3.17953	-6.97275	48.1662	0.18974	93.1578	0.13711	138.165	0.37983
3.22494	-4.34432	48.2057	0.17656	93.1968	0.19168	138.204	0.05934
3.26494	-0.18372	48.2454	0.15018	93.2359	0.16746	138.244	-0.08697
3.30408	-0.01705	48.2852	0.17701	93.2759	0.13051	138.285	-0.12756
3.34244	-0.06673	48.3319	0.13335	93.3146	-1.69337	138.324	-0.07867
3.38144	0.08129	48.3788	0.08663	93.3536	-6.74072	138.364	-0.28626
3.42043	0.0739	48.4193	0.12744	93.3954	-24.7422	138.403	-0.27433
3.46267	0.0615	48.4583	0.05616	93.4405	-13.9157	138.448	0.23795
3.50281	0.03627	48.4984	0.16212	93.481	-6.1159	138.488	-0.51239
3.54372	0.0922	48.5447	0.18281	93.5214	-1.14221	138.529	0.06776
3.58373	0.11335	48.5901	0.17519	93.5618	-0.39427	138.568	-0.05218
3.62393	0.15689	48.6293	-0.50363	93.6074	-0.01319	138.615	1.06263
3.66285	0.22692	48.6683	-4.58522	93.6516	-0.00443	138.659	0.19133
3.70223	0.28547	48.7063	-14.7976	93.6903	0.01262	138.698	-1.88345
3.74836	0.24636	48.7453	-20.2359	93.7293	-0.04434	138.738	-8.19455
3.79383	0.19566	48.7846	-3.28544	93.7693	-0.06537	138.778	-32.8705
3.83168	0.12687	48.8276	-2.00657	93.809	-0.01432	138.824	-35.1856
3.87199	0.09584	48.8721	-0.93598	93.8512	0.06344	138.871	-8.3636
3.91234	0.12301	48.9111	-0.3447	93.8902	0.06014	138.91	-1.92472
3.95235	0.11835	48.9501	0.14529	93.9342	0.08708	138.95	-1.23362
3.99171	18.2752	48.9908	-0.03593	93.9733	0.01364	138.989	-0.35038
4.03271	2.33786	49.0374	-0.03206	94.0142	0.10129	139.027	0.23419
4.07583	1.36322	49.0824	0.21419	94.0539	0.22828	139.068	0.01774
4.11619	0.22817	49.1208	0.2193	94.099	0.21203	139.109	-0.12221
4.15547	0.14813	49.1604	0.08572	94.145	0.13881	139.153	0.20998
4.19385	0.25102	49.1989	-0.0673	94.1853	0.17951	139.192	0.26171
4.23256	0.09845	49.238	0.11539	94.2258	0.18099	139.232	0.07628
4.27157	0.10505	49.277	0.36027	94.2652	0.07321	139.271	0.18179
4.31559	0.08913	49.3215	0.564	94.3113	37.5302	139.311	-0.02228
4.35912	0.11687	49.3641	0.28922	94.3575	15.5729	139.351	-0.18861
4.3998	0.16996	49.4041	0.27057	94.3992	4.04225	139.392	-0.10004
4.43795	0.11084	49.4439	0.27751	94.4382	1.08741	139.436	-0.25602
4.47811	0.13165	49.4837	0.2143	94.478	0.22339	139.476	-0.24136
4.52483	0.07014	49.5299	0.24636	94.5234	0.27342	139.516	-0.34618
4.57053	0.03376	49.5759	0.10459	94.5687	0.07424	139.556	-0.60584
4.60955	0.02512	49.6167	4.48915	94.6073	0.15325	139.601	0.03672
4.65017	-0.00978	49.6551	27.4111	94.6464	0.17235	139.646	-0.04366
4.68995	0.17849	49.6951	9.00661	94.687	0.15552	139.685	13.4419
4.73618	-0.01614	49.7411	2.78897	94.7266	0.21896	139.725	52.2597
4.78031	0.08697	49.7872	0.53933	94.7672	-0.05207	139.764	16.2752
4.82032	0.10948	49.8278	0.20077	94.8091	-0.00819	139.803	5.22016
4.85869	0.10357	49.8676	0.14359	94.8504	0.04707	139.842	1.47782
4.89884	0.11289	49.9059	0.11414	94.8904	0.14518	139.886	0.68144
4.93772	0.06833	49.952	0.15621	94.9297	0.09027	139.929	0.28831
4.9766	0.08743	49.998	0.08311	94.9685	0.14904	139.968	0.24306
5.01857	-0.00398	50.0386	0.04138	95.0067	0.216	140.008	0.2284
5.06248	-0.31685	50.0781	0.02581	95.0467	0.24306	140.048	0.22283
5.10274	-1.52102	50.1176	0.07469	95.0859	0.24977	140.094	0.19418
5.14308	-9.92361	50.1628	0.18315	95.1252	0.1811	140.141	0.000113687
5.18368	-4.36648	50.2084	0.13506	95.1671	0.17906	140.181	0.09334
5.23091	-3.39173	50.2481	0.16996	95.2101	0.11926	140.216	-0.11482
5.27518	0.04218	50.2863	0.32549	95.2492	0.09129	140.256	0.12017
5.31436	0.09288	50.3267	0.29718	95.2885	0.06708	140.295	0.36084
5.35446	0.054	50.3672	0.3306	95.3303	-1.82365	140.333	0.77432
5.39391	0.04559	50.4062	0.37255	95.3691	-6.77426	140.38	0.81252
5.43394	-0.093	50.4477	0.4103	95.4094	-26.4793	140.422	1.88527
5.47449	0.08595	50.4921	0.38131	95.4539	-15.3401	140.462	0.79774
5.5145	0.08106	50.5321	0.53137	95.4984	-5.46345	140.502	0.34868
5.55756	0.1146	50.5721	0.27023	95.5384	-0.99044	140.542	0.20862
5.59618	0.17099	50.6122	0.08708	95.5792	-0.34584	140.588	0.17803
5.63455	0.16576	50.6575	-2.74315	95.619	-0.000795808	140.634	0.16178
5.67499	0.18963	50.7043	-11.6391	95.6634	0.20702	140.674	0.11335
5.714	0.2035	50.7454	-20.6788	95.711	-0.00853	140.713	-2.62912
5.75281	0.22237	50.7854	-2.4005	95.75	-0.00671	140.753	-16.384
5.79606	0.19713	50.8261	-1.06752	95.7898	0.01012	140.8	-42.3143
5.84056	0.15484	50.8716	-0.81468	95.8291	-0.00887	140.84	-20.5879
5.88012	0.19804	50.9143	0.02819	95.8674	0.07037	140.879	-6.28711
5.92013	0.16882	50.9552	-0.06526	95.9059	0.02944	140.922	-1.40608
5.9604	0.14074	50.9933	0.11914	95.9486	0.08959	140.962	-0.402
6.00788	16.121	51.0328	0.21066	95.9929	0.1005	141.002	0.27603
6.05256	3.21427	51.0737	0.17269	96.0325	0.0922	141.041	0.41189
6.09293	0.74147	51.1147	0.13108	96.0714	0.10459	141.087	-0.04138
6.13294	0.61107	51.1547	0.16848	96.1104	0.10334	141.133	-0.07481
6.17268	0.18065	51.1969	0.11482	96.1493	0.07378	141.171	0.06446
6.21828	0.08924	51.2374	-0.83708	96.1877	0.13949	141.211	-0.08811
6.26438	0.08504	51.2758	-1.69234	96.2321	0.07503	141.251	-0.3572
6.30493	0.10255	51.3159	-1.52295	96.2748	0.16985	141.291	-0.14631
6.34453	0.0822	51.3623	0.48931	96.313	17.8833	141.33	-0.09925
6.38418	0.05173	51.4086	0.19611	96.3534	33.2918	141.373	0.07867
6.43043	0.06253	51.4483	0.48806	96.3921	8.6203	141.417	0.13915
6.47526	0.10562	51.4876	0.37153	96.4325	1.94098	141.456	0.14325
6.51546	0.09265	51.5281	0.17269	96.4724	0.40234	141.496	0.23954
6.55525	0.11232	51.5731	0.4743	96.5124	0.14984	141.535	0.27171
6.59405	0.12074	51.6193	5.27166	96.5577	0.27273	141.58	0.19622
6.64043	0.09061	51.6604	27.7666	96.5968	0.27671	141.625	-0.14188
6.68657	0.0307	51.6994	9.63848	96.6368	0.2052	141.665	0.11016
6.72503	0.03718	51.7394	2.00419	96.6768	0.26137	141.704	66.7453
6.76446	0.07196	51.7857	0.51057	96.7174	0.33072	141.746	22.0508
6.80356	0.06355	51.8309	0.40541	96.7574	0.29297	141.792	6.94683
6.84205	0.04775	51.8725	0.03786	96.802	0.20407	141.838	1.33878
6.88209	0.02649	51.9127	-0.05286	96.8452	0.01216	141.879	0.56605
6.9241	0.04638	51.9522	0.02467	96.8848	0.12938	141.919	0.31503
6.96884	0.04286	51.9983	0.08265	96.9238	0.1769	141.959	0.2459
7.00724	-0.04263	52.0423	-0.00716	96.9644	0.15211	142.006	0.21237
7.04748	-0.59993	52.0824	0.09129	97.0104	0.08299	142.051	0.12221
7.08594	0	52.1214	-0.00205	97.0569	0.33504	142.091	0.04081
7.12511	-7.17625	52.1604	0.0108	97.0971	0.25364	142.131	0.06003
7.15951	-7.66204	52.1999	0.1894	97.1365	0.33322	142.171	0.30707
7.20533	-1.60912	52.2405	0.3439	97.1756	0.29661	142.218	0.19702
7.25073	-0.05252	52.282	0.40404	97.2203	0.13779	142.263	0.2475
7.29074	0.00398	52.326	0.26284	97.2672	0.07026	142.302	0.26159
7.33049	0.0324	52.366	0.19566	97.3071	-0.47191	142.341	0.30877
7.3709	0.00864	52.4049	0.05605	97.3467	-3.76542	142.381	0.10505
7.41746	0.07128	52.4454	0.06219	97.3854	-12.2487	142.429	0.0847
7.46221	0.05707	52.4919	0.10004	97.4256	-24.3584	142.474	0.15893
7.50247	0.05411	52.5386	0.02854	97.4654	-10.9792	142.513	0.11153
7.54248	0.06617	52.5768	0.10834	97.5049	-4.66673	142.552	0.09265
7.58249	0.07708	52.6164	0.03752	97.5489	-1.3689	142.593	0.28456
7.6283	0.10016	52.6566	-3.33955	97.5892	-0.19349	142.64	0.26625
7.67462	0.20736	52.7032	-11.3233	97.6297	-0.03195	142.685	0.2492
7.71447	0.28456	52.7502	-19.6832	97.6702	0.12926	142.723	-2.62435
7.75498	0.19679	52.7907	-2.1704	97.7162	0.16223	142.763	-10.3494
7.793	0.15007	52.8297	-0.75272	97.7622	0.07037	142.801	-33.5532
7.83901	0.15677	52.87	-1.09549	97.8011	0.11164	142.842	-37.2006
7.88421	0.11198	52.9162	-0.10971	97.8414	0.18167	142.882	-7.8611
7.9243	0.12074	52.9606	0.06298	97.882	0.03149	142.925	-2.68653
7.96399	0.13597	53.0013	0.06321	97.9282	0.05991	142.966	-1.06752
8.00355	18.5813	53.0413	0.08197	97.9722	0.06901	143.008	-0.57037
8.04368	3.30897	53.0821	0.14109	98.0122	0.05923	143.048	-0.27023
8.08368	1.41654	53.1288	0.15837	98.0516	0.07481	143.088	-0.00159
8.1223	0.41086	53.1731	0.11835	98.0924	0.2409	143.135	0.08527
8.16692	0.21748	53.2122	0.13324	98.139	0.19827	143.18	0.02046
8.2068	0.0889	53.2522	0.15132	98.1846	0.12847	143.219	0.11823
8.24705	0.05184	53.2925	0.06332	98.2246	0.13699	143.258	0.27671
8.28768	0.07617	53.3379	0.07742	98.2641	0.13813	143.299	0.27933
8.33552	0.06605	53.3835	0.1196	98.3042	19.4273	143.345	0.09948
8.37992	0.09754	53.4236	0.10436	98.351	31.5645	143.391	0.08777
8.41925	0.12415	53.4626	0.09084	98.3959	7.51834	143.431	0.12903
8.45946	0.07378	53.5019	0.11198	98.4349	1.28864	143.472	0.05048
8.49972	0.04479	53.5407	0.09152	98.4765	0.29593	143.513	0.23158
8.54605	0.02774	53.581	0.15962	98.516	-0.12176	143.559	0.21578
8.59206	0.0806	53.6274	11.6647	98.5568	0.29684	143.602	-0.12358
8.63222	0.06264	53.6719	23.9226	98.5969	0.23374	143.642	0.35686
8.6713	0.03843	53.7105	7.74685	98.641	0.22339	143.683	15.8445
8.71195	0.0947	53.7513	1.84014	98.6827	0.29422	143.723	43.7253
8.75841	0.07776	53.7919	0.55377	98.7225	0.23783	143.769	17.8342
8.80342	0.04104	53.8378	0.07662	98.7629	0.2143	143.809	2.81955
8.84344	0.03683	53.8841	0.11198	98.8031	0.06992	143.849	1.0341
8.88437	0.04047	53.9237	0.10357	98.8494	-0.09732	143.891	0.21453
8.92344	0.09436	53.9641	0.14529	98.8952	0.21953	143.929	0.14916
8.96992	0.04979	54.0045	0.14279	98.9351	0.19656	143.97	0.22078
9.01532	-0.01262	54.0506	0.12324	98.9753	0.46089	144.01	0.19918
9.05433	-0.48965	54.0967	0.06298	99.0154	0.43758	144.057	0.14472
9.09434	-0.84367	54.1367	0.09595	99.0558	0.14666	144.101	0.26239
9.13396	-10.2455	54.176	0.08572	99.0948	0.27671	144.142	0.24795
9.18023	-3.5626	54.2165	0.11016	99.1391	0.33549	144.181	0.2367
9.22592	-3.65856	54.2641	0.13836	99.1832	0.23363	144.221	0.18531
9.26658	-0.17371	54.308	0.17371	99.2234	0.29513	144.267	0.20782
9.30659	-0.03001	54.349	0.15166	99.2626	0.16007	144.312	0.08106
9.34693	0.02569	54.389	0.15712	99.3021	-0.618	144.354	0.06946
9.39318	0.01955	54.4291	0.1512	99.3494	-3.96062	144.393	0.07196
9.43838	0.04979	54.4757	0.10937	99.3884	-14.0175	144.435	0.17837
9.47839	0.07014	54.5212	0.10311	99.4294	-24.1234	144.474	0.07958
9.51893	0.08777	54.5612	0.09129	99.4696	-12.2124	144.515	0.14381
9.55793	0.03911	54.6017	0.11528	99.5089	-4.45937	144.557	0.14597
9.6047	0.0806	54.6418	-0.41223	99.5503	-1.81171	144.601	0.27842
9.65017	0.2351	54.6877	-3.90253	99.5903	-0.17099	144.64	0.29581
9.69043	0.17974	54.7318	-15.2903	99.6365	-0.1022	144.681	0.06071
9.73044	0.19111	54.772	-19.2637	99.6826	0.04673	144.72	-5.53553
9.77099	0.16632	54.8127	-4.49654	99.7234	0.62221	144.768	-19.7567
9.81843	0.16189	54.8534	-1.99179	99.7626	0.65154	144.814	-43.7367
9.86217	0.13392	54.9	-0.06469	99.8026	0.11255	144.854	-12.192
9.90187	0.12926	54.9437	-0.0482	99.8498	0.22123	144.895	-5.31691
9.94205	0.15416	54.9837	0.0374	99.8943	0.21498	144.935	-1.30069
9.98206	17.835	55.0237	0.03695	99.9342	0.19315	144.98	-0.56184
10.0292	3.22768	55.0637	0.12142	99.975	0.21589	145.023	0.01978
10.0742	1.12925	55.1096	0.10539	100.015	0.2434	145.065	0.09845
10.1142	0.01853	55.1557	0.11175	100.055	0.18645	145.104	0.21919
10.154	0.13051	55.1951	0.10073	100.095	0.27387	145.143	0.23988
10.1941	0.14995	55.2361	0.08924	100.138	0.30047	145.19	0.17258
10.2401	0.17678	55.2771	0.06867	100.182	0.18531	145.235	-0.1445
10.2862	0.05537	55.3245	0.06457	100.222	0.11585	145.275	0.23942
10.3265	0.05343	55.3662	0.10209	100.261	0.23294	145.315	-0.1927
10.3668	0.05821	55.4062	0.09686	100.302	10.4874	145.355	0.31582
10.4069	0.05844	55.4458	0.10573	100.348	35.4696	145.402	0.49079
10.4539	0.06912	55.4858	0.12108	100.393	7.32007	145.446	0.10107
10.4976	0.07219	55.5319	0.17417	100.433	1.84366	145.487	0.24488
10.5386	0.10084	55.578	0.08492	100.473	0.56355	145.527	-0.01535
10.5787	0.09129	55.6206	0.86993	100.513	0.19691	145.567	0.09641
10.6184	-0.03729	55.6605	26.8475	100.559	0.26034	145.613	0.32855
10.6649	0.04752	55.7005	10.3616	100.604	-0.08481	145.659	0.09334
10.7099	0.0432	55.7448	3.63332	100.644	0.04263	145.699	55.5708
10.7502	0.06025	55.79	0.63937	100.685	0.15166	145.739	30.4322
10.7911	0.02819	55.8307	0.26387	100.724	0.10436	145.78	8.38384
10.8315	0.11232	55.8714	0.08902	100.769	0.21237	145.826	2.21291
10.8781	0.08015	55.9118	0.06617	100.817	0.39324	145.871	0.37323
10.9244	0.02319	55.9579	0.09595	100.857	0.26932	145.91	0.25045
10.9635	0.03615	56.0009	0.09072	100.898	0.22385	145.95	0.14086
11.0043	-0.04843	56.042	0.04911	100.938	0.06003	145.99	0.15007
11.0459	-0.17508	56.0824	0.04229	100.985	0.0681	146.038	0.17599
11.0898	-0.47544	56.1224	0.09595	101.028	0.11698	146.082	0.27399
11.1354	-6.75436	56.1702	0.13051	101.068	0.14666	146.123	0.2866
11.1773	-8.03038	56.2129	0.1545	101.108	0.25432	146.164	0.25943
11.216	-3.32227	56.2523	0.16394	101.149	0.06412	146.204	0.11289
11.2574	-1.1031	56.2942	0.18179	101.196	0.20179	146.251	0.08174
11.3027	0.03763	56.3351	0.07515	101.239	0.29718	146.293	0.12028
11.3467	-0.00989	56.3818	0.08981	101.279	0.25409	146.334	0.0739
11.3863	0.02979	56.4241	0.11221	101.32	-0.74465	146.373	0.10823
11.4262	0.03047	56.4639	0.093	101.36	-5.05065	146.413	0.19884
11.4672	0.08265	56.5038	0.11858	101.408	-20.5383	146.461	0.25875
11.5133	0.08311	56.5442	0.11858	101.45	-18.7762	146.505	0.22033
11.5586	0.1362	56.591	0.15336	101.491	-8.04744	146.545	0.28956
11.5988	0.13267	56.6356	-0.59447	101.53	-2.52976	146.585	0.21657
11.6393	0.1063	56.6761	-5.03985	101.57	-0.80661	146.625	0.08174
11.6793	0.14438	56.7161	-16.8638	101.617	0.11562	146.673	0.05411
11.7259	0.15268	56.7558	-15.1622	101.662	0.02342	146.717	-4.33147
11.7709	0.13154	56.8034	-2.84058	101.703	0.07515	146.759	-14.1716
11.8102	0.13222	56.849	-1.89107	101.745	0.07572	146.799	-43.9982
11.8504	0.12437	56.8879	0.00728	101.784	0.21942	146.838	-18.1256
11.8907	0.18451	56.9279	-0.18736	101.832	0.07788	146.886	-6.16637
11.9369	0.13813	56.9669	-0.03024	101.875	0.11232	146.93	-1.50021
11.9829	12.1256	57.014	0.01694	101.914	0.24454	146.97	-1.19985
12.0221	7.35588	57.0591	0.09823	101.954	0.14563	147.01	0.16905
12.0621	1.69814	57.1015	0.06332	101.995	0.17656	147.049	-0.04161
12.1011	0.55581	57.1414	0.09754	102.042	0.15609	147.096	-0.03354
12.1467	0.0706	57.1818	0.14461	102.087	0.05991	147.137	-0.02194
12.1925	0.09618	57.2282	0.18099	102.128	0.1537	147.176	0.07151
12.2336	0.10232	57.2706	0.24272	102.169	0.11539	147.218	0.17008
12.2739	0.10527	57.3096	0.20543	102.208	0.24136	147.259	-0.04684
12.3136	0.06503	57.3498	0.27705	102.255	0.23692	147.3	0.2567
12.3597	0.06787	57.3922	0.18861	102.298	0.981	147.34	0.23249
12.4041	0.08947	57.4381	0.14677	102.339	39.3103	147.387	0.20736
12.4442	0.09061	57.4824	0.14927	102.378	12.0908	147.428	0.02444
12.4863	0.07822	57.5234	0.12039	102.42	2.72985	147.47	0.17224
12.5263	0.0731	57.5632	0.12085	102.467	0.5831	147.51	0.03467
12.5733	0.12483	57.6026	0.20941	102.506	0.29729	147.552	0.17394
12.6187	-0.04104	57.6499	24.2902	102.547	0.0681	147.598	-0.00853
12.6591	0.04786	57.6955	12.3905	102.588	0.0739	147.639	0.11869
12.7002	-0.02001	57.7359	4.20255	102.629	0.16496	147.68	8.88781
12.7402	0.05048	57.7763	0.84287	102.669	-0.02149	147.721	56.1314
12.7872	0.01955	57.8177	0.24329	102.708	0.23522	147.762	14.6176
12.8307	-0.11391	57.8619	0.13949	102.756	0.28967	147.808	3.40617
12.8707	0.09106	57.9051	0.11471	102.802	0.19475	147.851	1.07582
12.9117	0.08458	57.9451	0.11198	102.842	0.19349	147.893	0.33128
12.9524	0.06355	57.9848	0.10266	102.881	0.11903	147.934	0.18861
12.9981	0.01137	58.0241	0.09254	102.922	0.17587	147.975	0.20793
13.042	-0.15393	58.0716	0.13051	102.968	0.07367	148.018	0.12597
13.0821	-0.64915	58.1178	0.07151	103.014	0.19384	148.063	0.30559
13.1236	-7.81699	58.1588	0.07731	103.053	0.18053	148.105	0.31775
13.1632	-8.72183	58.1998	0.07594	103.093	0.27921	148.144	0.26887
13.2097	-3.04544	58.2408	0.12039	103.133	0.10357	148.185	0.18235
13.2529	-1.97304	58.286	0.17383	103.18	0.25682	148.232	0.15484
13.2937	0.07003	58.33	0.09572	103.225	0.14609	148.274	0.11312
13.334	0.03354	58.3704	0.14018	103.267	0.10539	148.314	0.1404
13.375	0.03649	58.4105	0.1337	103.306	-0.15211	148.354	0.08595
13.4218	0.05275	58.452	0.07878	103.345	-3.16572	148.394	0.16917
13.4643	0.02967	58.4971	0.11369	103.392	-11.523	148.44	0.17894
13.5053	0.0598	58.5421	0.10709	103.437	-22.8689	148.487	0.29934
13.5458	0.05537	58.5819	0.12301	103.478	-9.3064	148.527	0.23715
13.5861	0.10721	58.6234	0.08856	103.518	-3.96051	148.568	0.23954
13.634	0.0781	58.6632	-2.30477	103.558	-1.72054	148.607	0.09902
13.676	0.14268	58.7086	-8.09814	103.603	-0.42701	148.653	0.11494
13.716	0.17701	58.7496	-24.1465	103.65	0.13836	148.698	-0.89415
13.7561	0.15677	58.7906	-6.6733	103.69	-0.33697	148.738	-7.31211
13.7965	0.11494	58.8322	-1.87208	103.731	0.5756	148.778	-24.5297
13.8445	0.11346	58.8712	-0.26193	103.771	0.17928	148.818	-38.7456
13.8903	0.13551	58.9121	-0.32026	103.817	0.14177	148.865	-11.9965
13.9309	0.16621	58.9528	-0.25216	103.862	0.04809	148.91	-2.99758
13.9709	0.67917	58.998	0.07731	103.902	0.2741	148.95	-1.29376
14.0105	12.8821	59.0408	0.03058	103.942	0.12972	148.992	-0.10812
14.056	1.692	59.082	0.07174	103.982	0.11971	149.032	0.04638
14.1	0.62971	59.122	0.06639	104.028	0.05571	149.076	-0.43326
14.1397	0.53137	59.163	0.04593	104.074	0.26068	149.121	-0.05627
14.1797	0.10186	59.2087	0.04673	104.114	0.06139	149.162	-0.16007
14.2203	0.04695	59.2526	0.13233	104.154	0.07481	149.203	0.13222
14.267	0.11096	59.2938	0.09368	104.194	0.16939	149.242	0.1429
14.312	0.09277	59.3342	0.08288	104.241	0.09811	149.288	-0.37335
14.3514	0.05684	59.3746	0.11926	104.287	-0.03899	149.332	0.0648
14.3919	0.07833	59.4206	0.11335	104.326	36.4677	149.373	0.02149
14.432	0.04763	59.4642	0.08367	104.367	22.5657	149.413	0.11198
14.4783	0.07287	59.5039	0.10266	104.407	5.31077	149.453	0.24363
14.5234	0.11767	59.5438	0.08731	104.454	1.14642	149.501	0.07549
14.5648	0.0482	59.5838	0.09857	104.494	0.25034	149.542	0.2932
14.6045	0.06617	59.6302	8.62315	104.535	0.2284	149.583	0.21623
14.6445	-0.00648	59.6758	25.7472	104.576	0.22987	149.624	0.21282
14.691	0.0598	59.716	7.80631	104.616	0.22351	149.666	0.97009
14.7359	0.08754	59.7553	2.10957	104.656	0.13347	149.711	66.495
14.7769	0.06196	59.7943	0.3547	104.697	0.23942	149.756	20.7943
14.8179	0.04616	59.8413	0.1686	104.737	0.19054	149.797	6.08634
14.859	-0.005	59.8868	0.10323	104.777	0.12187	149.836	1.0557
14.905	0.01626	59.9303	0.11369	104.819	0.20918	149.878	0.61118
14.9467	0.07083	59.9703	0.16018	104.864	0.10971	149.923	0.30013
14.9888	0.03047	60.0113	0.05821	104.905	0.00455	149.967	0.25932
15.0285	0.02035	60.0543	0.08708	104.947	0.10516	150.007	0.24397
15.0698	-0.32048	60.0987	0.12551	104.986	0.23965	150.048	0.2276
15.115	-1.2368	60.1404	0.0955	105.031	0.10812	150.088	0.08072
15.1613	-9.90656	60.1805	0.11892	105.074	0.14427	150.135	0.11119
15.2016	-4.47619	60.2207	0.12744	105.114	0.26853	150.177	0.09129
15.2419	-3.03123	60.2655	0.12392	105.154	0.20179	150.218	0.10266
15.2812	-0.52137	60.3097	0.15336	105.194	0.15143	150.258	0.10823
15.3284	0.0764	60.3501	0.13063	105.241	0.10834	150.299	0.25909
15.3714	0.05844	60.39	0.06719	105.285	0.07003	150.346	0.30832
15.4114	0.04616	60.4308	0.0972	105.327	-0.88482	150.39	0.20998
15.4518	0.03956	60.4779	0.13574	105.367	-4.65764	150.431	0.18417
15.492	0.02035	60.5222	0.13995	105.406	-21.632	150.471	0.22374
15.5369	0.02353	60.5632	0.12471	105.454	-18.9983	150.512	0.16564
15.5845	0.04661	60.6042	0.14836	105.499	-6.56553	150.558	0.1985
15.6245	0.05707	60.6459	-0.29149	105.54	-0.92109	150.603	0.17337
15.6659	0.12255	60.69	-4.00371	105.58	-0.72816	150.643	0.26989
15.7069	0.1985	60.7336	-15.7741	105.621	-0.45861	150.684	0.14711
15.752	0.17553	60.7759	-17.9222	105.667	0.1105	150.724	-5.31566
15.7955	0.10107	60.8169	-3.74155	105.709	0.46293	150.769	-17.3812
15.8357	0.10039	60.8574	-0.51944	105.749	-0.37721	150.812	-48.0439
15.876	0.08856	60.9033	-0.63699	105.789	0.00125	150.853	-14.9876
15.9159	0.15314	60.9457	0.10812	105.83	0.05389	150.894	-5.11795
15.9562	0.17837	60.9854	0.04866	105.877	0.2716	150.934	-1.5184
15.9961	13.0807	61.0264	0.0033	105.918	0.16064	150.982	-0.44133
16.0417	6.17626	61.0674	0.13688	105.957	0.21407	151.026	-0.01421
16.0892	1.28853	61.1131	0.07708	105.999	0.18713	151.065	0.17894
16.1292	0.34458	61.1578	0.08629	106.039	0.04104	151.106	0.14518
16.1699	0.14552	61.1979	0.11619	106.081	-0.16928	151.147	0.11153
16.2103	0.21487	61.2381	0.06901	106.122	0.11926	151.194	0.1296
16.2562	0.12903	61.2781	0.11698	106.167	0.12722	151.234	-0.22908
16.2996	0.04547	61.3241	0.09618	106.209	0.103	151.274	0.11903
16.3393	0.00887	61.3698	0.12744	106.25	0.01569	151.316	0.0731
16.3803	0.0415	61.4102	0.10289	106.291	0.14268	151.355	0.10516
16.42	0.04854	61.4505	0.10266	106.332	35.5459	151.394	-0.10948
16.4663	0.05468	61.4919	0.11153	106.379	24.0974	151.435	0.26216
16.5119	0.06412	61.5371	0.11778	106.419	6.15057	151.483	0.31878
16.5512	0.02774	61.5808	0.10584	106.459	1.37936	151.528	0.26887
16.5926	0.05798	61.6208	3.16732	106.5	0.36027	151.568	0.2226
16.6328	0.00568	61.6608	27.8283	106.542	-0.02137	151.607	0.30082
16.6802	0.07003	61.701	9.05959	106.583	0.05355	151.647	0.14859
16.7252	-0.06048	61.7483	2.68267	106.624	0.13699	151.693	0.31275
16.7665	0.03536	61.7941	0.49147	106.667	0.16132	151.738	65.9795
16.8062	0.02967	61.8344	0.16951	106.711	0.2301	151.779	18.9059
16.846	0.09175	61.8742	0.13108	106.753	0.19588	151.82	5.69389
16.8925	-0.05593	61.9142	0.12847	106.795	0.15916	151.86	1.15199
16.9359	0.00625	61.9629	0.1537	106.834	0.11539	151.907	0.61982
16.9762	-0.00978	62.0039	0.08151	106.88	0.09538	151.95	0.29729
17.0162	-0.05502	62.0449	0.09561	106.923	0.06139	151.99	0.29252
17.0567	-0.20407	62.0854	0.09857	106.962	0.01216	152.03	0.20168
17.0967	-0.71043	62.1242	0.08174	107.005	-0.00387	152.069	0.19952
17.1387	-6.64068	62.1721	0.13642	107.046	0.07185	152.115	0.14973
17.1801	-9.09552	62.2159	0.11323	107.091	0.22453	152.162	0.21464
17.2247	-3.06454	62.2571	0.15484	107.135	0.30889	152.202	0.22681
17.2659	-3.53464	62.2963	0.14302	107.176	0.1512	152.243	0.24045
17.3059	-0.88289	62.3362	0.11789	107.216	0.19577	152.284	0.22305
17.346	-0.89881	62.3824	0.13961	107.256	0.11767	152.331	0.19702
17.3927	-1.11561	62.4295	0.1462	107.302	0.16109	152.374	0.12301
17.4363	-2.12015	62.4703	0.1055	107.346	-2.11139	152.414	0.15848
17.4764	-1.50476	62.5113	0.13642	107.387	-7.84962	152.453	0.10687
17.5164	-0.39586	62.5516	0.12665	107.427	-26.3118	152.493	0.13836
17.5563	-0.04468	62.5967	0.14006	107.467	-12.3778	152.541	0.21089
17.6022	0.11482	62.6387	0.11187	107.513	-5.18014	152.585	0.26546
17.6483	0.24602	62.6801	-2.42449	107.56	-1.52977	152.626	0.31901
17.6903	0.52887	62.7202	-8.09246	107.6	0.20839	152.669	0.28103
17.7313	1.26124	62.7622	-23.7659	107.642	0.59458	152.709	-1.44837
17.7718	2.20655	62.8074	-4.05066	107.683	0.01251	152.753	-7.97854
17.8159	2.25918	62.8502	-1.52204	107.726	0.18258	152.796	-32.2985
17.8589	0.25875	62.8921	-2.04705	107.771	0.0324	152.837	-39.5427
17.9	0.3447	62.9328	-0.22442	107.813	-0.03206	152.878	-10.8233
17.941	0.34561	62.9743	0.15325	107.854	0.30877	152.92	-1.90244
17.9813	9.03083	63.0178	0.09061	107.895	-0.02092	152.963	-1.82115
18.0282	7.33951	63.0629	0.07685	107.938	0.21498	153.008	-0.15348
18.0706	1.63254	63.104	0.06889	107.982	0.08743	153.048	0.10129
18.1108	0.34061	63.1459	0.08947	108.022	0.093	153.089	0.09777
18.1518	0.51796	63.1878	0.12153	108.063	0.07424	153.129	0.0382
18.1923	0.13949	63.2312	0.11414	108.104	0.23249	153.175	0.08572
18.2382	0.03001	63.2748	0.11471	108.151	0.30479	153.219	-0.30821
18.2839	0.24693	63.316	0.14563	108.195	0.16985	153.259	0.11926
18.324	0.06332	63.3554	0.1055	108.235	0.2226	153.298	0.06492
18.3646	0.00819	63.396	0.10857	108.275	0.17587	153.34	0.06969
18.4044	0.00387	63.442	0.12415	108.317	0.22669	153.386	0.15723
18.4503	-0.00284	63.4852	0.11698	108.362	41.4594	153.431	0.15575
18.4947	0.01819	63.5248	0.13836	108.405	13.8024	153.471	0.01637
18.5368	-0.06787	63.566	0.11505	108.446	3.45631	153.513	0.39711
18.5769	-0.22749	63.6063	0.1902	108.487	0.49806	153.553	-0.0681
18.6179	-0.3887	63.6536	21.3715	108.527	0.30582	153.6	0.20486
18.6622	-0.39233	63.6966	15.3466	108.572	0.25159	153.643	0.19327
18.7059	-0.48578	63.7385	4.66002	108.617	0.18304	153.683	0.52114
18.7459	-0.39415	63.7795	1.09526	108.658	0.0133	153.723	67.5235
18.7859	-0.64733	63.8209	0.25216	108.698	0.08856	153.764	19.6849
18.827	-0.45247	63.8687	0.12437	108.738	0.07287	153.811	4.25803
18.874	-0.38358	63.9142	0.1088	108.783	0.04979	153.854	0.84765
18.9175	-0.2608	63.9548	0.14302	108.829	0.21998	153.895	0.4859
18.9588	-0.16553	63.9957	0.1254	108.869	0.20782	153.935	0.38699
19.0005	0.15791	64.0348	0.09277	108.91	0.18781	153.975	0.22089
19.0407	0.08038	64.0818	0.11914	108.952	0.22499	154.023	0.22635
19.0841	-0.26739	64.1255	0.08356	108.996	0.216	154.066	0.47567
19.1289	-8.59347	64.1656	0.12346	109.039	-0.01955	154.106	0.32458
19.1704	-9.61506	64.2056	0.15302	109.08	0.08492	154.145	0.29752
19.2118	-2.09798	64.2465	0.07878	109.121	0.07162	154.186	0.16666
19.2527	-1.0657	64.2925	0.14666	109.163	-0.00966	154.232	0.24841
19.2959	0.0324	64.3377	0.16269	109.207	0.13654	154.276	0.15757
19.3404	0.0897	64.3784	0.12108	109.251	0.19361	154.317	0.12574
19.3805	0.11062	64.4201	0.12574	109.291	0.3397	154.357	0.18156
19.4215	0.08504	64.4611	0.12949	109.332	-1.00749	154.397	0.20736
19.4626	0.11755	64.5055	0.14211	109.374	-6.83588	154.443	0.23363
19.5082	0.14097	64.5481	0.12938	109.419	-23.1796	154.488	0.20816
19.5522	0.09288	64.5881	0.12585	109.462	-16.4242	154.53	0.30877
19.5938	0.1163	64.6279	0.00989	109.504	-6.33327	154.571	0.23465
19.6353	0.12517	64.6707	-3.80908	109.545	-1.50351	154.611	0.12994
19.6762	0.15928	64.7157	-12.2595	109.586	-0.44076	154.656	0.17371
19.7199	0.18724	64.7606	-19.6684	109.631	0.15768	154.7	-0.1786
19.7633	0.1678	64.8018	-3.09876	109.674	0.17371	154.74	-3.50906
19.8046	0.20236	64.8418	-0.67269	109.714	0.14768	154.78	-16.3466
19.8456	0.1645	64.882	-0.99396	109.755	0.11562	154.821	-47.6181
19.8865	0.20555	64.9285	-0.02126	109.797	0.08993	154.868	-14.3057
19.931	0.18167	64.9715	0.05446	109.842	0.02353	154.911	-4.42685
19.9739	0.36266	65.0128	0.04616	109.886	0.14666	154.952	-1.86378
20.0145	13.4481	65.0538	0.09697	109.928	0.17792	154.995	-0.40893
20.0559	1.78807	65.0943	0.07333	109.969	0.1985	155.035	0.13813
20.0962	0.61868	65.1399	0.11823	110.011	0.19315	155.079	0.05662
20.144	0.19656	65.1848	0.1121	110.055	-0.10982	155.122	0.12494
20.1867	0.34606	65.2258	0.10573	110.098	0.14859	155.162	-0.11653
20.2279	0.15928	65.2668	0.05173	110.138	0.05525	155.203	0.08993
20.2683	0.11016	65.309	0.12176	110.18	0.09413	155.243	0.62994
20.3096	0.10107	65.3522	0.05605	110.222	0.12255	155.29	0.30116
20.3534	0.06798	65.3945	0.11983	110.265	0.15916	155.333	0.2691
20.3964	0.03934	65.4358	0.08879	110.309	0.22396	155.374	0.17769
20.4384	0.05457	65.476	0.10186	110.349	38.2979	155.414	0.2002
20.4805	0.05502	65.5164	0.10664	110.391	19.1425	155.453	0.000568434
20.5216	0.08833	65.5642	0.09209	110.432	4.99335	155.501	0.32537
20.5642	0.0656	65.6052	0.10141	110.477	1.28296	155.546	0.44656
20.6094	0.13119	65.6478	19.577	110.52	0.13517	155.586	0.09265
20.6494	0.09845	65.6888	19.6702	110.562	-0.01785	155.627	0.46953
20.6904	0.05377	65.7291	5.38569	110.602	0.41564	155.667	0.40711
20.7322	-0.07014	65.7749	1.1014	110.642	0.201	155.714	63.1987
20.7763	0.01114	65.817	0.42428	110.69	0.17678	155.757	23.9429
20.8208	-0.00182	65.8579	0.06958	110.732	0.13392	155.797	8.63361
20.8611	0.10027	65.9001	0.09595	110.772	0.3422	155.838	1.50692
20.9021	0.07151	65.9412	0.10539	110.814	0.16234	155.879	0.50966
20.9431	0.12517	65.9857	0.12847	110.856	-0.00739	155.926	0.39267
20.9844	0.06003	66.03	0.09959	110.899	0.17815	155.97	0.25011
21.0247	-0.04684	66.0715	0.05434	110.943	0.13688	156.013	0.18872
21.0659	-0.42792	66.1135	0.09106	110.984	0.22499	156.054	0.15052
21.1089	-2.14675	66.1548	0.1254	111.024	0.13461	156.094	0.21544
21.1508	-8.61712	66.198	0.16439	111.066	0.17826	156.141	0.17724
21.1921	-2.75065	66.2404	0.14109	111.112	0.09686	156.185	0.26102
21.2337	-3.13253	66.2819	0.14791	111.155	-0.0108	156.227	0.21703
21.2764	-0.17076	66.3239	0.13063	111.196	0.12176	156.268	0.24761
21.3204	0	66.364	0.06844	111.237	0.26262	156.309	0.20304
21.3622	0.0158	66.4101	0.10493	111.279	0.08367	156.354	0.12528
21.3963	0.03274	66.4517	0.12858	111.324	-0.64415	156.399	0.11664
21.4363	-0.0158	66.4918	0.09879	111.366	-3.94721	156.439	0.12528
21.4763	0.0266	66.5334	0.09868	111.407	-15.749	156.48	0.17883
21.5163	0.02217	66.5744	0.06264	111.448	-19.5548	156.521	0.25352
21.5597	0.06162	66.6198	0.10812	111.49	-7.06189	156.566	0.2791
21.6027	0.07378	66.6646	-2.58171	111.534	-1.70644	156.61	0.26068
21.6437	0.15189	66.7062	-9.22569	111.578	-0.97009	156.65	0.29809
21.6849	0.19384	66.7472	-23.9871	111.619	-0.04889	156.689	0.06651
21.7263	0.21089	66.7882	-3.35046	111.66	-0.06276	156.73	-4.59602
21.7696	0.18701	66.8362	-1.39516	111.702	0.25136	156.772	-16.6818
21.8128	0.14427	66.8823	-0.6122	111.747	0.26262	156.813	-52.0209
21.8539	0.16735	66.9234	0.11789	111.79	0.28399	156.859	-15.1173
21.8939	0.14813	66.9642	0.05821	111.831	0.1404	156.903	-3.79214
21.9357	0.14427	67.0058	0.05741	111.874	0.21294	156.944	-1.60298
21.982	3.57647	67.0491	-0.0208	111.915	0.07594	156.985	-0.34095
22.0243	9.52923	67.0941	0.06696	111.956	0.14836	157.026	0.12994
22.0656	1.41074	67.1359	0.01626	112.001	0.04968	157.071	-0.17565
22.1066	0.66393	67.1778	0.13597	112.042	0.09413	157.116	0.04798
22.1461	0.07981	67.2181	0.1578	112.083	0.25739	157.156	0.08652
22.1946	0.05616	67.2615	0.15075	112.125	0.0274	157.197	0.3846
22.2364	0.15518	67.3056	0.10948	112.169	0.31469	157.239	0.23601
22.2779	0.05286	67.3467	0.07094	112.211	-0.03354	157.279	0.11937
22.3193	0.03274	67.3883	0.07628	112.253	0.20634	157.319	0.10118
22.3602	0.11778	67.4288	0.09993	112.293	0.19008	157.36	0.32526
22.404	0.08242	67.4739	0.08504	112.334	40.3971	157.404	0.02785
22.448	0.11732	67.516	0.1296	112.38	12.3952	157.444	0.30116
22.49	0.08254	67.557	0.12585	112.423	3.82056	157.485	0.55093
22.5303	0.1246	67.5987	0.1337	112.464	0.59288	157.526	0.13733
22.5713	0.06912	67.6403	9.06095	112.505	0.19713	157.572	0.13847
22.6123	0.0706	67.6836	28.0297	112.546	0.18144	157.615	0.34834
22.6525	-0.02012	67.7274	7.77243	112.592	0.1628	157.656	0.1728
22.6995	-0.03513	67.7701	1.86037	112.635	0.12221	157.698	37.4973
22.7418	0.02262	67.8121	0.49806	112.676	0.07344	157.74	33.6357
22.7832	0.00739	67.8522	0.18701	112.717	0.08686	157.783	11.1563
22.825	0.13085	67.8961	0.1163	112.758	0.07481	157.826	2.37969
22.866	0.11676	67.938	0.13517	112.803	0.08504	157.867	0.77193
22.91	0.07071	67.9808	0.16087	112.847	0.23226	157.908	0.38517
22.9547	0.02342	68.0218	0.14791	112.888	0.22033	157.948	0.19622
22.9959	0.01739	68.0624	0.07117	112.93	0.19429	157.993	0.20509
23.0362	-0.12085	68.1062	0.09459	112.971	0.1296	158.037	0.14813
23.0761	-0.50886	68.1504	0.11073	113.015	0.22294	158.078	0.10482
23.1219	-3.39594	68.1914	0.08481	113.059	0.0739	158.118	0.04218
23.1665	-8.37895	68.2328	0.13506	113.1	0.000113687	158.159	0.22283
23.2079	-3.00975	68.274	0.1761	113.141	-0.03297	158.205	0.22465
23.2494	-1.68427	68.3188	0.16882	113.177	0.08401	158.249	0.26398
23.2917	0.06889	68.3616	0.12483	113.225	0.13904	158.29	0.23488
23.3333	0.0565	68.4042	0.15029	113.27	0.32924	158.329	0.22726
23.378	0.02751	68.444	0.13233	113.31	0.25739	158.37	0.09436
23.4185	-0.01785	68.4878	0.07435	113.35	-1.00238	158.417	0.15814
23.4598	0.00864	68.529	0.13119	113.391	-6.09703	158.461	0.17326
23.5007	0.06776	68.5745	0.15382	113.437	-22.9359	158.502	0.17621
23.5455	0.09845	68.616	0.16928	113.482	-18.3724	158.543	0.19304
23.5887	0.1387	68.6562	-1.03512	113.523	-6.44718	158.585	0.13733
23.6305	0.13893	68.6974	-6.09771	113.565	-1.06604	158.628	0.13529
23.6719	0.17951	68.7401	-21.2589	113.606	-0.36152	158.673	0.12312
23.7129	0.31309	68.7842	-11.5735	113.649	-0.0216	158.713	-2.77316
23.7573	0.05139	68.8249	-2.23838	113.692	0.04957	158.754	-10.5849
23.7995	0.19531	68.8652	-0.22635	113.734	0.08299	158.796	-37.4929
23.841	0.17485	68.9074	-0.49522	113.775	0.1005	158.839	-25.059
23.8818	0.20123	68.9517	0.08276	113.815	0.07344	158.883	-7.02983
23.9227	0.28149	68.995	0.07299	113.861	0.08276	158.926	-1.05206
23.9667	0.19782	69.0362	0.10641	113.905	-0.09209	158.966	-0.89005
24.0118	15.5918	69.0784	0.07265	113.945	0.19861	159.007	-0.0349
24.0519	4.39684	69.1206	0.15677	113.986	0.36528	159.051	-0.17758
24.0922	1.05001	69.1639	0.1171	114.026	0.18747	159.094	0.17008
24.1333	0.13017	69.2077	0.10095	114.072	0.14938	159.136	0.05321
24.1783	0.1844	69.25	0.11596	114.117	0.0723	159.176	-0.0415
24.2236	0.13767	69.2922	0.09652	114.159	-0.09095	159.218	0.07321
24.2649	0.09572	69.3342	0.10334	114.199	0.02922	159.263	0.2799
24.3064	0.12926	69.3753	0.10903	114.24	0.15496	159.306	0.19349
24.3468	0.08868	69.4185	0.13949	114.286	0.15962	159.347	0.2367
24.3908	0.09459	69.4584	0.15234	114.329	31.8199	159.387	0.21942
24.4343	0.05218	69.5002	0.13972	114.372	23.3823	159.428	0.54013
24.4757	-0.02046	69.541	0.09345	114.414	6.36464	159.473	-0.02274
24.5161	0.06446	69.5864	0.11744	114.455	1.39835	159.52	0.08936
24.5561	0.06457	69.6305	5.45083	114.496	0.35698	159.56	-0.1844
24.6029	-0.05707	69.6707	27.9177	114.539	0.04707	159.602	0.34288
24.6453	0.11266	69.7115	9.34062	114.581	-0.00648	159.643	0.16871
24.6873	0.10027	69.7524	2.19006	114.622	0.05127	159.69	19.9181
24.7283	0.000909495	69.7995	0.41871	114.663	0.17212	159.735	41.8966
24.7699	0.06526	69.8429	0.24079	114.707	0.05252	159.776	16.4646
24.8139	0.11948	69.8837	0.06332	114.752	0.12392	159.816	2.97075
24.8564	0.02046	69.9246	0.13392	114.796	0.04479	159.857	0.7268
24.899	-0.01444	69.9648	0.13506	114.837	0.04309	159.903	0.3007
24.94	-0.05264	70.0108	0.09038	114.879	0.02228	159.952	0.20304
24.982	0.00136	70.0536	0.10687	114.919	0.11539	159.996	0.13176
25.0251	0.05821	70.0943	0.14666	114.962	0.11335	160.037	0.2691
25.0687	-0.17553	70.1348	0.13108	115.004	0.16576	160.078	0.13961
25.1103	-1.11061	70.1759	0.16007	115.044	0.18167	160.122	0.25193
25.1506	-5.8842	70.2219	0.16144	115.085	0.20259	160.164	0.20202
25.1916	-10.7179	70.2648	0.11323	115.129	0.20486	160.204	0.17621
25.2365	-3.08512	70.3078	0.13608	115.174	0.01125	160.245	0.2359
25.28	-1.16131	70.3499	0.13074	115.216	-0.02831	160.286	0.2766
25.32	-0.00716	70.391	0.13461	115.257	-0.09697	160.331	0.25125
25.362	0.0058	70.4323	0.12176	115.298	0.08572	160.376	0.19702
25.4042	0.08038	70.4777	0.16087	115.342	-1.02091	160.417	0.15541
25.4487	0.09902	70.519	0.15746	115.385	-5.26643	160.458	0.17678
25.492	0.07969	70.561	0.18804	115.427	-22.4163	160.498	0.2326
25.5335	0.06287	70.6035	0.15484	115.469	-16.7423	160.542	0.20282
25.5746	0.01398	70.6446	0.09175	115.51	-6.76141	160.587	0.28763
25.616	0.000227374	70.6886	-2.69051	115.554	-1.3797	160.628	0.22374
25.6599	0.00819	70.73	-9.46534	115.598	-0.30604	160.669	0.19668
25.703	0.11732	70.771	-23.4426	115.638	-0.04832	160.71	-0.99544
25.7437	0.17008	70.813	-3.64082	115.679	-0.0955	160.754	-7.35076
25.7851	0.21441	70.8548	-1.40801	115.721	0.10721	160.799	-28.9527
25.8265	0.27137	70.8981	-1.08764	115.765	0.10948	160.839	-42.0845
25.871	0.24454	70.9393	-0.36323	115.807	-0.03115	160.881	-12.3708
25.9147	0.20248	70.9795	0.15848	115.849	0.01114	160.923	-1.95507
25.9557	0.11039	71.0215	-0.07731	115.891	0.07526	160.967	-1.59707
25.9967	12.4003	71.0666	0.08981	115.933	0.06366	161.011	-0.1927
26.0374	4.03691	71.1102	0.04934	115.977	0.03456	161.052	0.17462
26.0818	0.91234	71.1522	0.098	116.02	-0.01364	161.093	0.30047
26.1254	0.40393	71.1944	0.10323	116.06	0.00966	161.133	0.09652
26.1665	0.18485	71.2356	0.15166	116.101	0.11744	161.177	0.0083
26.2081	0.16109	71.278	0.17815	116.141	0.16121	161.22	0.18747
26.2488	0.07321	71.3228	0.11812	116.188	0.19384	161.262	0.12972
26.2936	-0.0316	71.3642	0.06514	116.232	0.16905	161.303	0.03877
26.3366	-0.02933	71.4055	0.1271	116.273	0.06162	161.344	0.06719
26.3787	-0.00637	71.4474	0.05161	116.314	0.06878	161.388	0.17099
26.4198	0.054	71.4904	0.10812	116.356	40.528	161.432	0.23647
26.4609	0.147	71.5327	0.14415	116.4	12.7336	161.473	0.3788
26.5059	0.108	71.5729	0.15302	116.448	4.00803	161.514	-0.25341
26.5489	0.0922	71.6144	0.18576	116.488	0.7326	161.555	0.11369
26.5899	0.05309	71.6564	19.5807	116.529	0.21203	161.599	0.18429
26.632	0.05627	71.6998	21.2378	116.571	-0.0922	161.644	0.17201
26.674	-0.01398	71.7443	5.9398	116.617	0.05207	161.684	4.0128
26.717	-0.02467	71.7864	1.324	116.661	0.11539	161.726	56.7926
26.7601	-0.01023	71.8284	0.43894	116.702	0.18986	161.767	18.7699
26.8022	0.04957	71.8694	0.10402	116.743	0.17315	161.811	3.899
26.8428	0.00375	71.9116	0.0648	116.785	0.18485	161.856	0.85311
26.8845	0.12608	71.9544	0.14848	116.827	0.22612	161.897	0.39324
26.9275	0.11062	71.9952	0.18645	116.872	0.0415	161.939	0.24147
26.9727	0.0847	72.0376	0.16007	116.915	0.05298	161.981	0.18122
27.0138	0.00375	72.0786	0.14018	116.956	0.05593	162.022	0.21748
27.0558	-0.19054	72.1229	0.10391	116.997	0.04388	162.065	0.22533
27.098	-0.57025	72.1658	0.10834	117.039	0.08606	162.106	0.18031
27.141	-6.98412	72.2067	0.09766	117.083	0.21566	162.147	0.20009
27.1836	-7.63123	72.2489	0.11437	117.126	0.24943	162.188	0.2367
27.2253	-3.70676	72.29	0.18701	117.167	0.20975	162.234	0.17292
27.2666	-0.15723	72.3339	0.14325	117.208	0.20759	162.277	0.24329
27.3087	0.0897	72.3785	0.14541	117.251	0.18144	162.318	0.14506
27.3512	0.10129	72.421	0.15177	117.293	0.12983	162.359	0.23442
27.3947	0.01512	72.462	0.1404	117.335	-0.3389	162.399	0.18258
27.4359	0.04206	72.5045	0.13608	117.376	-3.41754	162.446	0.15768
27.4769	-0.00421	72.5461	0.10414	117.417	-13.8444	162.489	0.19952
27.5179	0.00466	72.5881	0.12619	117.461	-23.7774	162.529	0.19008
27.5639	0.04661	72.6302	-0.02262	117.505	-10.3776	162.571	0.16814
27.606	0.12108	72.6731	-3.27157	117.547	-2.47155	162.613	0.21339
27.6462	0.10925	72.7141	-11.6573	117.59	-0.51398	162.658	0.16155
27.6872	0.21589	72.7563	-21.898	117.631	-0.21498	162.701	-0.83935
27.7283	0.32549	72.8003	-2.89765	117.674	0.03467	162.742	-7.38521
27.7751	0.16087	72.8438	-0.56116	117.717	-0.05878	162.782	-25.3788
27.8183	0.09743	72.886	-2.32421	117.758	-0.33197	162.824	-39.0438
27.8613	0.11596	72.9285	-0.34015	117.8	0.1927	162.868	-11.2063
27.9023	0.17542	72.9717	0.12233	117.841	0.28649	162.911	-1.24737
27.945	0.18883	73.0118	0.06401	117.885	0.21225	162.953	-1.37948
27.9861	1.16813	73.0528	0.10834	117.927	0.2359	162.993	-0.61596
28.0292	11.0459	73.0937	0.03627	117.97	0.2035	163.034	-0.17701
28.0692	1.93347	73.1356	0.13881	118.012	0.14404	163.078	0.01501
28.1113	0.7575	73.1798	0.11335	118.054	0.13733	163.122	0.14472
28.1523	0.10971	73.2224	0.11346	118.101	0.23385	163.162	0.16712
28.1983	0.04775	73.2654	0.07867	118.145	0.18497	163.202	0.16246
28.2405	0.02251	73.3065	0.09868	118.187	0.24045	163.243	0.20191
28.2815	0.03263	73.3486	0.17121	118.228	0.28263	163.289	0.13881
28.3236	0.10255	73.3901	0.06173	118.27	0.18258	163.332	0.0615
28.3639	0.18485	73.4335	0.12687	118.314	1.14471	163.372	0.05184
28.4085	0.13074	73.4758	0.14631	118.357	36.6562	163.413	0.12562
28.4523	0.10596	73.519	0.15416	118.4	10.2826	163.455	0.0573
28.4959	0.17235	73.559	0.15325	118.441	2.47815	163.502	0.22817
28.5369	0.02694	73.601	0.1528	118.483	0.6944	163.545	0.30332
28.5789	-0.0191	73.6461	10.681	118.525	0.23829	163.585	0.16996
28.6202	-0.04286	73.6889	25.6263	118.568	0.22135	163.627	0.26
28.6628	0.00387	73.7298	7.59405	118.609	0.1437	163.667	0.15041
28.7062	0.06173	73.7711	2.18256	118.651	0.14211	163.712	60.4065
28.7486	0.17553	73.8131	0.4959	118.694	0.0789	163.757	18.4189
28.7899	0.10914	73.8571	0.216	118.736	0.13017	163.798	6.88362
28.8319	0.14222	73.8991	0.14063	118.779	0.14541	163.839	1.47827
28.8751	0.10823	73.94	0.16064	118.822	0.13472	163.881	0.49931
28.9169	0.01171	73.9818	0.11926	118.862	0.13097	163.924	0.23488
28.9606	0.00921	74.0238	0.1055	118.903	0.32389	163.967	0.26114
29.0019	-0.00807	74.0677	0.00773	118.948	0.2243	164.008	0.19179
29.0431	-0.20316	74.1097	0.09686	118.996	0.16746	164.049	0.13949
29.0868	-0.765	74.1503	0.13245	119.036	0.08492	164.091	0.18736
29.1286	-7.37714	74.1928	0.15609	119.078	0.07572	164.135	0.17042
29.1701	-9.84141	74.2416	0.13813	119.12	0.31389	164.179	0.09845
29.2104	-3.20119	74.2859	0.16246	119.165	0.30661	164.221	0.12642
29.2546	-1.03114	74.3285	0.07105	119.208	0.34322	164.262	0.21998
29.2986	0.04616	74.3698	0.12767	119.249	0.18167	164.303	0.17894
29.3409	-0.02103	74.4108	0.13245	119.289	0.22419	164.345	0.19531
29.3829	-0.03388	74.4547	0.16701	119.33	-0.3414	164.389	0.19452
29.4249	0.05662	74.4962	0.17747	119.376	-3.44266	164.43	0.18019
29.4669	0.07412	74.5384	0.19099	119.42	-14.7434	164.47	0.15132
29.5089	0.14643	74.5799	0.16269	119.461	-22.0898	164.51	0.19941
29.551	0.11539	74.6224	0.06173	119.502	-11.5559	164.557	0.27273
29.5916	0.18395	74.6659	-1.89596	119.543	-2.90981	164.601	0.22828
29.6328	0.10164	74.7079	-7.50151	119.588	-0.86595	164.641	0.196
29.6775	0.0523	74.7485	-23.9681	119.63	-0.17474	164.682	0.14575
29.7201	0.08777	74.7908	-7.75719	119.672	0.06503	164.723	-4.24131
29.7611	0.1354	74.8335	-2.40527	119.713	0.04923	164.769	-15.4904
29.8031	0.13597	74.8755	-0.11096	119.755	0.12801	164.812	-43.2382
29.844	0.29888	74.9195	0.00659	119.798	0.11869	164.854	-16.6962
29.8921	0.28172	74.9619	0.26239	119.843	0.27376	164.895	-5.98448
29.9384	0.09788	75.004	0.02376	119.885	0.20577	164.937	-1.66654
29.9808	0.10687	75.0463	-0.01933	119.927	0.22249	164.982	-0.55263
30.0219	18.8862	75.0888	0.03797	119.969	0.22419	165.024	-0.12983
30.0639	1.70712	75.1299	0.09015	120.011	0.10573	165.067	0.02149
30.1059	0.89142	75.1729	0.12972	120.054	0.08606	165.108	0.01683
30.1505	0.33879	75.2148	0.16132	120.096	0.12312	165.15	0.10709
30.1924	0.1869	75.2562	0.20611	120.138	0.13858	165.192	0.3148
30.2339	0.13972	75.2985	0.13574	120.181	0.14575	165.237	0.1844
30.2746	0.09663	75.3435	0.07196	120.221	0.06366	165.28	0.12028
30.3187	0.03195	75.3855	0.09175	120.263	0.22112	165.321	0.10698
30.3615	0.03774	75.4285	0.05991	120.306	0.02524	165.362	0.12312
30.4031	-0.0191	75.4714	0.13108	120.346	28.7316	165.404	0.12642
30.4442	0.04809	75.5139	0.1852	120.387	22.4638	165.447	0.12483
30.4862	0.19065	75.5543	0.14506	120.431	6.84201	165.488	0.18781
30.5302	0.16132	75.596	0.16746	120.476	0.73624	165.53	0.15086
30.5722	0.1902	75.638	10.7381	120.518	0.56752	165.572	0.02149
30.6125	0.1462	75.68	26.5772	120.561	0.15655	165.615	0.108
30.6531	0.12881	75.722	8.03743	120.601	0.27762	165.657	0.24443
30.6964	-0.03615	75.7645	1.97326	120.643	0.29161	165.698	31.2525
30.7404	-0.04422	75.8066	0.50386	120.688	0.1512	165.74	38.8517
30.7844	0.02365	75.8491	0.23419	120.729	0.27501	165.782	10.8695
30.8264	0.06958	75.8908	0.07833	120.769	0.22533	165.827	2.40846
30.8684	0.02819	75.9326	0.12233	120.812	-0.23022	165.87	0.62857
30.9103	0.14973	75.9755	0.1952	120.854	-0.48294	165.911	0.29604
30.9526	0.13688	76.0175	0.14893	120.899	-0.22169	165.953	0.21885
30.9966	0.07901	76.0595	0.09288	120.941	0.04479	165.995	0.17906
31.0373	-0.0199	76.1004	0.06571	120.982	0.07208	166.037	0.13881
31.0793	-0.56332	76.1428	0.06037	121.024	0.04343	166.081	0.23772
31.1213	-0.35743	76.1879	0.07014	121.067	0.13483	166.122	0.17155
31.1647	-8.53458	76.2307	0.08481	121.11	-0.11346	166.164	0.1404
31.2075	-5.70299	76.2724	0.16371	121.153	0.01978	166.205	0.216
31.2483	-3.64275	76.3155	0.19213	121.195	0.19202	166.253	0.19816
31.2904	0.02467	76.3555	0.17394	121.237	-0.11232	166.3	0.19645
31.3306	0.10743	76.3975	0.14256	121.28	-0.79365	166.342	0.12221
31.3756	0.11482	76.4395	0.2201	121.322	-0.03331	166.383	0.21976
31.4188	-0.00273	76.4805	0.13961	121.365	-1.72406	166.425	0.19349
31.4608	-0.02899	76.5218	0.13324	121.409	-7.91908	166.467	0.16519
31.5028	-0.02353	76.5659	0.05753	121.449	-24.2991	166.51	0.16053
31.5444	0.03092	76.6099	0.15564	121.49	-13.0121	166.551	0.15734
31.5869	0.0839	76.6525	-0.41666	121.532	-5.75835	166.592	0.22067
31.6308	0.1711	76.6928	-4.1731	121.573	-1.13914	166.634	0.15973
31.6728	0.18542	76.7351	-15.9378	121.615	-0.06867	166.678	0.20066
31.7148	0.23113	76.7772	-18.638	121.658	0.08299	166.722	-2.98667
31.7568	0.21726	76.8215	-2.7843	121.701	0.14074	166.764	-12.7232
31.7979	0.25568	76.8621	-0.57821	121.745	0.10778	166.806	-40.6727
31.841	0.14973	76.9044	-0.56741	121.787	0.34288	166.847	-23.1646
31.8829	0.14177	76.9465	0.04138	121.828	0.07947	166.889	-6.08486
31.9249	0.15996	76.9939	0.04775	121.87	-0.34674	166.933	-1.6671
31.9669	0.13017	77.0403	-0.11357	121.913	0.10982	166.976	-0.59777
32.0093	20.8229	77.0823	0.0108	121.955	0.21896	167.017	-0.25886
32.0523	1.89198	77.1247	0.03888	121.997	-0.4635	167.057	0.04559
32.0949	1.34924	77.1655	0.0507	122.038	-0.57901	167.102	-0.06389
32.1374	0.32242	77.208	0.06298	122.08	0.01694	167.145	0.1537
32.1785	0.02785	77.2518	0.17883	122.123	0.18315	167.187	-0.00512
32.2198	0.01035	77.2916	0.18588	122.167	0.11767	167.229	0.08822
32.2644	0.04877	77.3349	0.17553	122.209	0.25545	167.272	0.03422
32.3082	0.09845	77.3769	0.17155	122.251	0.2417	167.314	-0.0623
32.3499	0.19088	77.4207	0.19475	122.295	0.2384	167.357	0.18474
32.3914	0.04104	77.4627	0.08288	122.336	9.01741	167.399	0.23886
32.438	0.03547	77.5058	0.07992	122.378	36.5076	167.44	0.05161
32.4821	0.01273	77.5484	0.12551	122.42	8.92089	167.482	0.10959
32.5238	-0.01296	77.5892	0.14177	122.462	2.26407	167.523	0.02444
32.565	0.00864	77.6303	3.79873	122.503	0.7069	167.566	0.05639
32.6081	0.06753	77.6748	28.3973	122.546	0.4751	167.609	0.26387
32.6491	0.15416	77.7161	9.01684	122.591	-0.02751	167.65	0.14961
32.6949	0.08458	77.7575	2.61912	122.632	0.14836	167.691	29.4396
32.7374	0.08663	77.7998	0.64495	122.674	0.12619	167.737	43.7248
32.7789	0.02717	77.8419	0.17599	122.714	0.27205	167.784	15.6446
32.8199	-0.14347	77.8861	0.06833	122.756	0.17428	167.826	2.53908
32.862	-0.03081	77.9281	0.09288	122.801	0.28524	167.867	1.33093
32.9059	0.02444	77.9702	0.14529	122.841	0.24477	167.909	0.22726
32.9461	0.01648	78.0122	0.16905	122.881	0.33299	167.952	0.17747
32.9884	0.03661	78.0542	0.13495	122.922	-0.05832	167.997	0.19531
33.0298	0.00784	78.0966	0.15507	122.969	-0.25841	168.039	0.18542
33.0741	-0.18235	78.1388	0.12949	123.013	-0.4203	168.08	0.18963
33.1168	-0.14347	78.1808	0.08288	123.054	-0.55695	168.121	0.1545
33.1594	-8.04448	78.2228	0.05525	123.096	-0.40802	168.164	0.23283
33.2	-7.71252	78.2661	0.1387	123.138	-0.08095	168.208	0.12551
33.2428	-3.28691	78.3081	0.13165	123.181	0.04809	168.25	0.1844
33.286	-0.42348	78.3483	0.16325	123.224	0.20077	168.29	0.1379
33.3283	0.00887	78.3914	0.16837	123.266	0.14848	168.333	0.20214
33.3693	0.09709	78.4318	0.22078	123.307	0.21294	168.38	0.12028
33.4115	0.19486	78.4751	0.18747	123.351	-0.88676	168.425	0.1462
33.4522	0.09618	78.5198	0.16189	123.392	-4.37569	168.466	0.18463
33.4983	0.0606	78.5624	0.08754	123.436	-17.2357	168.507	0.16894
33.5403	-0.04127	78.6044	0.11403	123.477	-24.0462	168.549	0.19088
33.5812	0.00534	78.6451	-0.16371	123.517	-9.49103	168.595	0.15052
33.6234	0.00557	78.6878	-3.68868	123.559	-2.04363	168.637	0.06787
33.6635	0.103	78.7299	-13.3924	123.603	-0.90779	168.68	0.18929
33.7105	0.20373	78.772	-19.8817	123.646	0.15916	168.722	-3.32682
33.7528	0.27944	78.8128	-2.87253	123.688	0.16655	168.764	-12.5066
33.7938	0.30695	78.8548	-0.75158	123.729	0.02296	168.805	-39.894
33.8347	0.30025	78.897	-0.1902	123.77	-0.02319	168.849	-24.7965
33.8771	0.15984	78.9419	-0.12403	123.814	-0.07947	168.891	-7.50754
33.9218	0.08254	78.9842	-0.08481	123.859	0.19384	168.933	-0.41655
33.964	0.10118	79.0252	0.05844	123.901	0.28024	168.975	-1.12288
34.0059	19.1149	79.0672	0.09618	123.942	0.26853	169.015	0.22123
34.0461	2.75065	79.1094	0.11619	123.985	0.2965	169.058	0.12369
34.0883	1.28421	79.1539	0.1761	124.026	0.22169	169.1	0.11494
34.1324	0.28899	79.1956	0.06537	124.069	0.11335	169.143	0.13415
34.1765	0.37164	79.2379	0.16803	124.112	0.11676	169.185	0.12903
34.2185	0.13529	79.2788	0.11664	124.152	0.08652	169.226	0.02399
34.2611	-0.01	79.3218	0.08129	124.194	0.1337	169.27	-0.05696
34.3041	0.000227374	79.3638	0.05116	124.237	0.1902	169.312	0.11948
34.3463	-0.0158	79.406	0.04582	124.281	0.28263	169.356	0.01307
34.3883	0.04945	79.4484	0.09504	124.322	5.06282	169.398	0.11266
34.4303	0.13904	79.4905	0.15018	124.364	37.2795	169.441	0.09948
34.471	0.14768	79.5325	0.18076	124.406	8.28732	169.482	0.00341
34.5121	0.14529	79.5757	0.11687	124.453	1.6114	169.523	0.06116
34.5559	0.14813	79.6186	0.1819	124.498	0.4577	169.565	0.0806
34.5994	0.01774	79.6601	24.0199	124.54	0.25511	169.607	-0.12335
34.641	0.01091	79.7011	13.9066	124.582	0.2866	169.648	0.10618
34.683	-0.00182	79.7431	4.77132	124.623	0.21487	169.692	15.3877
34.7242	-0.03286	79.7871	1.15324	124.667	0.07503	169.734	52.011
34.7655	0.00671	79.8284	0.18076	124.71	0.11607	169.775	21.926
34.8096	0.05411	79.8715	0.10493	124.752	0.11028	169.817	3.41618
34.8516	0.16848	79.9128	0.08504	124.793	0.13449	169.86	1.00204
34.8938	0.16087	79.9612	0.09379	124.835	0.19315	169.904	0.30241
34.9357	0.14381	80.0053	0.08288	124.877	0.19986	169.947	0.17258
34.9777	0.10834	80.0477	0.07628	124.919	0.33253	169.988	0.09004
35.0208	-0.1512	80.0899	0.13972	124.961	0.28319	170.028	0.14643
35.0645	-0.36857	80.1325	0.1744	125.004	0.30889	170.072	0.15461
35.105	-0.57446	80.1729	0.16939	125.046	0.24556	170.116	0.23783
35.1479	-8.77162	80.2173	0.13199	125.087	0.25955	170.158	0.25489
35.1892	-7.4391	80.2583	0.12074	125.131	0.13017	170.199	0.25057
35.2333	-4.54122	80.2993	0.10448	125.172	0.07708	170.241	0.21214
35.2741	-0.31218	80.3405	0.093	125.213	0.12096	170.283	0.19065
35.3173	0.12267	80.384	0.06617	125.254	0.31423	170.327	0.23044
35.3583	0.0997	80.4281	0.10982	125.303	0.30934	170.368	0.15007
35.3984	0.08356	80.4711	0.16655	125.348	-0.17224	170.409	0.20577
35.4425	-0.00512	80.5125	0.14529	125.391	-2.96575	170.451	0.16507
35.4858	0.00796	80.5545	0.1387	125.431	-10.3885	170.495	0.19213
35.5269	-0.00625	80.5968	0.13574	125.473	-22.9333	170.539	0.21225
35.5695	0.07594	80.6411	-0.18133	125.518	-10.005	170.58	0.2093
35.6115	0.15996	80.6835	-3.47882	125.56	-4.58624	170.621	0.24193
35.6558	0.22771	80.7258	-12.3365	125.6	-0.95861	170.662	0.16371
35.6977	0.24784	80.7678	-20.4855	125.642	0.10186	170.707	-1.06093
35.7405	0.25352	80.8101	-3.22166	125.682	0.03172	170.748	-8.32392
35.7815	0.17985	80.8527	-0.64824	125.728	0.00716	170.79	-26.6565
35.8235	0.11096	80.8945	-0.91541	125.772	0.04206	170.833	-39.8827
35.8659	0.12244	80.9363	0.05821	125.816	0.17633	170.874	-13.402
35.9069	0.08254	80.9784	0.00716	125.857	0.18792	170.918	-3.37684
35.9473	0.1279	81.0199	-0.196	125.899	0.23488	170.96	-1.44837
35.9898	0.37471	81.0629	0.01967	125.94	0.20543	171.002	-0.71691
36.0347	14.1185	81.1053	0.06935	125.984	0.26148	171.044	0.22612
36.0767	1.61003	81.146	0.10743	126.027	0.13779	171.085	0.20532
36.1187	0.92723	81.1874	0.12676	126.07	0.07628	171.128	0.08026
36.1597	0.21191	81.2301	0.16678	126.112	0.04263	171.172	-0.65165
36.2009	0.02694	81.2721	0.14063	126.153	-0.01921	171.214	-0.29354
36.2458	0.19725	81.3156	0.11039	126.201	0.32981	171.256	0.04911
36.2903	0.07685	81.3576	0.07435	126.242	0.29274	171.298	0.2135
36.3313	0.04957	81.4002	0.05332	126.284	0.22385	171.34	0.38028
36.3724	0.12926	81.4424	0.01489	126.327	2.6165	171.383	0.13461
36.4149	0.18281	81.4859	0.10346	126.368	38.3724	171.424	0.07458
36.4582	0.147	81.5268	0.10755	126.413	8.75525	171.466	0.12574
36.5014	0.01717	81.5696	0.14381	126.454	2.33513	171.508	0.1844
36.5423	-0.05173	81.61	0.16212	126.497	0.51637	171.551	0.18838
36.5837	0.05593	81.6515	4.40423	126.539	0.3738	171.594	0.18133
36.626	-0.03513	81.6959	27.0869	126.581	0.21498	171.635	0.17099
36.6679	0.00705	81.7379	7.88032	126.623	0.22169	171.677	0.32173
36.7119	0.12881	81.7802	2.29704	126.666	0.12096	171.72	62.8261
36.7546	0.07833	81.8222	0.59356	126.707	0.12983	171.761	25.4466
36.7961	0.16087	81.8639	0.14347	126.75	0.10562	171.806	6.00403
36.8381	0.07822	81.9082	0.12017	126.792	0.13006	171.848	1.28625
36.8801	0.05139	81.9511	0.14234	126.833	0.1545	171.888	0.52171
36.9231	0.00568	81.9921	0.15416	126.875	0.13767	171.93	0.25943
36.9654	0.02353	82.0327	0.08777	126.917	0.30207	171.973	0.12597
37.0089	-0.000227374	82.0747	0.06992	126.959	0.34129	172.017	0.22931
37.051	-0.13688	82.118	0.09152	127.002	0.36391	172.059	0.34129
37.093	-0.55252	82.1604	0.03433	127.045	0.19566	172.1	0.30377
37.135	-2.35104	82.2025	0.05605	127.087	0.11278	172.142	0.16519
37.1761	-9.33017	82.2445	0.09175	127.129	0.14927	172.185	0.147
37.2181	-4.79156	82.2866	0.14722	127.172	0.17099	172.227	0.08652
37.2615	-1.75044	82.3316	0.18269	127.213	0.10834	172.27	0.16166
37.3027	-0.16848	82.3733	0.14745	127.257	0.31173	172.312	0.18986
37.3459	-0.0673	82.4159	0.10755	127.299	0.29092	172.355	0.2575
37.3873	-0.02365	82.4575	0.08708	127.341	-0.01739	172.397	0.21794
37.4293	0.01501	82.4985	0.07083	127.383	-3.88138	172.44	0.18952
37.4719	0.09891	82.5425	0.16666	127.429	-14.8531	172.482	0.19384
37.5148	0.13711	82.5851	0.11619	127.473	-23.379	172.523	0.20282
37.559	0.13858	82.6264	0.12574	127.514	-8.999	172.565	0.16223
37.599	0.10755	82.6686	-2.12572	127.556	-3.45892	172.607	0.12039
37.641	0.08595	82.7111	-8.21194	127.597	-0.9843	172.652	0.16371
37.6842	0.06901	82.7541	-24.4226	127.642	-0.16792	172.695	-0.02115
37.7326	0.23795	82.7963	-5.09715	127.686	-0.01717	172.737	-4.85193
37.7762	0.30298	82.8393	-1.82467	127.727	0.04275	172.778	-17.5016
37.8187	0.29172	82.8804	-0.35493	127.769	0.03695	172.818	-46.0648
37.8607	0.21851	82.9228	-0.11141	127.811	0.77148	172.862	-11.9078
37.9027	0.07901	82.9648	0.0822	127.859	0.10414	172.904	-4.64559
37.9458	0.10482	83.0058	-0.06048	127.905	0.13188	172.945	-1.24294
37.9885	1.15585	83.0478	0.16587	127.946	0.24181	172.988	-1.01386
38.0299	12.4094	83.0905	0.16792	127.987	0.22044	173.03	-0.00534
38.071	1.54785	83.1316	0.16178	128.029	0.03729	173.072	-0.29456
38.1127	0.85197	83.1746	0.0565	128.071	0.04661	173.114	0.32173
38.1561	0.25898	83.2166	0.07674	128.116	0.16792	173.155	0.22703
38.2004	0.12972	83.2586	0.08436	128.157	0.28967	173.197	0.09584
38.2418	0.14563	83.3001	0.08879	128.199	0.30786	173.246	-0.0465
38.2844	-0.02194	83.3424	0.06764	128.241	0.2409	173.291	0.15837
38.3261	0.01762	83.3881	0.15348	128.284	-0.02228	173.332	0.14711
38.3678	0.06082	83.4305	0.157	128.332	0.64949	173.374	0.18008
38.4104	0.06378	83.4748	0.10755	128.374	40.0942	173.415	0.04491
38.4527	0.1138	83.5178	0.0897	128.416	13.3855	173.458	0.1171
38.4937	0.07594	83.5593	0.07822	128.459	3.14992	173.502	0.20259
38.5369	-0.04866	83.6022	0.11107	128.5	1.01193	173.545	0.10346
38.5859	0	83.6458	6.08566	128.545	0.23203	173.586	-0.09641
38.6285	0.06355	83.6934	27.3321	128.587	0.12756	173.628	-0.0739
38.6645	-0.00227	83.7395	8.03652	128.628	0.02126	173.67	0.11141
38.7067	-0.00193	83.7815	1.92119	128.67	-0.01899	173.713	12.3728
38.7488	0.12108	83.8225	0.65677	128.711	0.23158	173.756	52.3248
38.7963	0.08924	83.8648	0.18895	128.754	0.08833	173.796	10.2279
38.8419	0.07913	83.9077	0.14529	128.797	0.2799	173.837	3.50212
38.8839	-0.01023	83.9507	0.14347	128.839	0.2857	173.881	0.77887
38.9267	-0.04979	83.9918	0.18315	128.881	0.20884	173.924	0.39256
38.9691	0.04195	84.0338	0.12801	128.923	0.22635	173.965	-0.01035
39.0111	0.06651	84.0763	0.0897	128.967	0.21009	174.008	0.07378
39.0545	-0.00284	84.1243	0.11835	129.008	0.14643	174.05	0.05093
39.0959	-0.24988	84.1688	0.1686	129.05	0.16382	174.092	-0.14904
39.1379	-2.98439	84.211	0.18531	129.092	0.21737	174.136	0.10641
39.1799	-11.1352	84.253	0.07401	129.135	0.21635	174.177	0.00534
39.2222	-2.88776	84.2961	0.10141	129.177	0.30286	174.219	-0.42019
39.2651	-2.04295	84.3418	0.11107	129.219	0.24784	174.261	0.37062
39.3062	-0.12153	84.3858	0.14882	129.262	0.21328	174.303	0.00728
39.3491	-0.05571	84.428	0.18099	129.304	0.10198	174.346	0.22283
39.39	0.04923	84.4704	0.1362	129.347	-0.68599	174.388	0.28751
39.4323	0.06594	84.5127	0.16189	129.39	-4.41764	174.431	-0.0025
39.476	0.12597	84.5558	0.18633	129.432	-17.9917	174.473	-0.70952
39.5184	0.11778	84.5981	0.0955	129.475	-22.3422	174.513	0.16598
39.5594	0.13677	84.641	-0.06742	129.516	-7.60792	174.558	-0.18611
39.6016	0.07731	84.6819	-3.02543	129.559	-1.46758	174.599	0.32014
39.6445	0.02626	84.7244	-11.0443	129.601	-0.64779	174.64	0.13858
39.687	0.06958	84.7655	-22.0933	129.643	-0.08492	174.681	0.50409
39.7298	0.12733	84.8085	-3.07386	129.686	-0.14052	174.726	-3.06488
39.7718	0.2708	84.8506	-1.14017	129.728	0.11005	174.774	-14.4358
39.8138	0.27808	84.8936	-1.13107	129.77	0.07958	174.816	-42.8669
39.8571	0.24579	84.9346	0.02615	129.811	0.05571	174.857	-17.0456
39.8997	0.19475	84.9771	0.11437	129.852	0.18588	174.9	-6.41683
39.9418	0.14836	85.0197	0.03433	129.893	0.23829	174.944	-0.55331
39.9829	0.14506	85.0617	0.05957	129.936	0.30207	174.987	-1.05615
40.0242	14.8724	85.1056	0.09925	129.979	0.3165	175.028	0.6753
40.067	4.70243	85.1479	0.15461	130.024	0.10175	175.069	0.6454
40.1103	1.09594	85.1898	0.11619	130.067	0.11028	175.112	0.4394
40.1524	0.21714	85.2321	0.05912	130.11	0.16519	175.154	0.16382
40.1944	0.12426	85.2763	0.06617	130.152	0.1138	175.198	0.59617
40.2353	0.19088	85.3249	0.02353	130.193	0.0822	175.24	0.26489
40.2784	0.17008	85.37	0.16416	130.235	0.23772	175.281	0.43894
40.3215	0.0706	85.4117	0.12483	130.278	0.20714	175.322	-0.04115
40.3623	0.02967	85.4547	0.07537	130.32	0.26341	175.365	-0.08731
40.4043	-0.04991	85.4969	0.08686	130.362	40.0348	175.41	0.31059
40.4465	-0.02933	85.5396	0.0872	130.405	15.6863	175.451	-0.03433
40.4886	0.03115	85.5806	0.08401	130.447	4.06646	175.493	0.00352
40.5339	0.04866	85.6211	0.11983	130.489	0.8439	175.536	0.28967
40.576	0.14563	85.6626	21.7873	130.532	0.21112	175.577	0.3372
40.617	0.12346	85.7046	15.124	130.573	0.10607	175.621	0.22555
40.6591	0.09493	85.7497	4.83919	130.615	0.19418	175.663	0.37539
40.7011	0.08015	85.7921	1.00295	130.656	0.30002	175.707	26.1256
40.7505	-0.00637	85.8336	0.32321	130.699	0.34527	175.748	43.6745
40.7924	0.0731	85.8756	0.10857	130.741	0.19759	175.79	14.1209
40.8347	0.12608	85.9167	0.04229	130.783	0.30468	175.832	3.8774
40.8768	0.14461	85.9605	0.05298	130.825	0.08185	175.874	1.60526
40.9188	0.12267			130.867	0.12801	175.917	0.79706
40.9668	-0.01739			130.909	0.17121	175.959	0.88107
				130.951	0.12494
				130.994	0.29183

## Sheet: Fig. 4j
x-axis-Time (s)	y-axis-Output Charge (nC)	x-axis-Time (s)	y-axis-Output Charge (nC)	x-axis-Time (s)	y-axis-Output Charge (nC)	x-axis-Time (s)	y-axis-Output Charge (nC)
P-PLA		MRSD-PLA2		MRSD-PLA4		MRSD-PLA6
0	-0.03231	27.8429	-0.08513	55.0671	0.83756	80	0.20757
0.09477	-0.03327	27.9368	-0.08599	55.137	0.92048	80.0697	0.40444
0.18818	-0.03423	28.0309	1.2843	55.2071	1.0739	80.1396	0.98036
0.282	-0.03451	28.1249	1.81071	55.2761	1.50363	80.2092	3.90675
0.37502	-0.03443	28.2189	1.82499	55.3468	3.57261	80.2791	6.44746
0.46797	-0.03458	28.3133	1.82099	55.4167	4.39343	80.3483	6.7943
0.56145	-0.03396	28.4079	1.81944	55.4862	4.42835	80.4187	6.90458
0.6542	0.03147	28.5019	1.8184	55.5566	4.36911	80.4881	6.92647
0.74873	0.365	28.5949	1.81426	55.6266	4.26648	80.558	6.92845
0.84136	0.52252	28.6889	1.81208	55.6959	4.16751	80.628	6.89113
0.93505	0.54904	28.7827	1.81162	55.7651	4.05931	80.6971	6.85115
1.02778	0.56229	28.8764	1.80803	55.8351	3.97026	80.7668	6.78436
1.1212	0.57171	28.9709	1.80307	55.904	3.87306	80.8371	6.73263
1.21406	0.57869	29.0636	1.59184	55.974	3.79777	80.9071	6.65779
1.30708	0.58315	29.1575	0.48317	56.043	3.71446	80.9769	6.59981
1.39998	0.58716	29.2503	0.09404	56.113	3.30892	81.0463	3.68203
1.49296	0.59036	29.344	0.02719	56.183	-0.3847	81.1167	-0.62499
1.58734	0.50454	29.4379	-0.00991	56.2529	-0.84874	81.1867	-1.11233
1.67995	0.03033	29.5313	-0.03647	56.3222	-0.70688	81.2577	-1.05037
1.7739	-0.03338	29.6255	-0.05248	56.392	-0.449	81.3299	-0.88524
1.86789	-0.0369	29.7199	-0.06626	56.4617	-0.21847	81.3994	-0.7347
1.96189	-0.03886	29.8139	-0.07863	56.5316	-0.0144	81.4693	-0.59894
2.0549	-0.03985	29.9079	-0.0864	56.602	0.1579	81.5393	-0.47748
2.14897	-0.04059	30.0016	0.33242	56.672	0.3146	81.6093	-0.37024
2.24217	-0.04087	30.0959	1.71094	56.742	0.44692	81.6793	-0.27304
2.33669	-0.04073	30.1899	1.832	56.8112	0.5673	81.7488	-0.18341
2.43097	-0.04074	30.2833	1.8329	56.8817	0.67227	81.818	-0.08981
2.52442	-0.04072	30.3776	1.82799	56.9517	0.77029	81.8883	-0.00891
2.61772	-0.02211	30.4716	1.82426	57.021	0.85594	81.9582	0.07342
2.7103	0.20875	30.5661	1.82363	57.0902	0.9347	82.028	0.16068
2.80401	0.49187	30.6593	1.81931	57.16	1.05116	82.0978	0.45948
2.89801	0.53623	30.7522	1.81567	57.2293	1.32679	82.1672	1.43928
2.99097	0.55213	30.8472	1.81526	57.2993	2.62099	82.2375	5.33807
3.08503	0.56207	30.9402	1.81271	57.369	4.29774	82.3079	6.57783
3.17903	0.56956	31.0342	1.69998	57.439	4.4521	82.3769	6.80122
3.27246	0.57544	31.1272	0.69681	57.5085	4.42349	82.4462	6.85257
3.36657	0.57968	31.2216	0.11869	57.578	4.35572	82.5163	6.86877
3.45963	0.58364	31.3159	0.03238	57.648	4.27084	82.5859	6.85124
3.55295	0.58379	31.4089	-0.00432	57.7184	4.18942	82.6549	6.83296
3.64595	0.16271	31.5027	-0.02819	57.7883	4.09544	82.7253	6.78739
3.74097	-0.03574	31.5973	-0.04834	57.8576	4.01472	82.7949	6.7529
3.83498	-0.04236	31.6904	-0.06207	57.9273	3.92415	82.8655	6.681
3.92897	-0.0451	31.7839	-0.06999	57.9974	3.85089	82.9347	6.62633
4.02283	-0.04726	31.8778	-0.07949	58.0667	3.76979	83.0042	6.5315
4.11686	-0.04855	31.9729	0.08058	58.136	3.04605	83.0743	1.37665
4.21059	-0.04966	32.0663	1.61649	58.2074	-0.46106	83.1439	-0.94246
4.30411	-0.05049	32.1609	1.84637	58.2774	-0.76486	83.2146	-1.16662
4.39727	-0.05068	32.2537	1.8495	58.347	-0.58688	83.2836	-1.05719
4.4915	-0.0509	32.3468	1.84891	58.4165	-0.31744	83.354	-0.88657
4.58496	-0.04773	32.4418	1.84659	58.4864	-0.09834	83.4237	-0.75109
4.67898	0.07391	32.5354	1.84332	58.5558	0.1044	83.4938	-0.61457
4.77214	0.42352	32.6294	1.84236	58.626	0.26287	83.5634	-0.51311
4.86547	0.5195	32.7229	1.84118	58.696	0.4159	83.6334	-0.39648
4.95999	0.54034	32.8173	1.83763	58.7664	0.54216	83.7033	-0.30904
5.05398	0.55205	32.9109	1.83577	58.836	0.66608	83.7736	-0.20738
5.14769	0.56012	33.0052	1.82536	58.9051	0.76448	83.8431	-0.13273
5.24196	0.56623	33.0979	1.43805	58.975	0.86554	83.9131	-0.0343
5.33547	0.57129	33.192	0.33301	59.045	0.94461	83.9823	0.05097
5.42812	0.57516	33.2849	0.08763	59.1143	1.03108	84.052	0.22216
5.52196	0.57823	33.3785	0.03056	59.1843	1.1526	84.1223	0.6608
5.61677	0.34729	33.4722	-0.00155	59.255	1.46454	84.1921	2.69078
5.70928	-0.02791	33.5661	-0.02278	59.3239	2.96034	84.2615	6.1298
5.80392	-0.04889	33.6589	-0.0422	59.3945	4.41673	84.3313	6.69398
5.89729	-0.05074	33.7531	-0.05534	59.464	4.50137	84.4004	6.82225
5.98979	-0.05195	33.8459	-0.06339	59.534	4.46423	84.4717	6.88109
6.08393	-0.05263	33.9399	-0.07294	59.604	4.37789	84.5413	6.8772
6.17715	-0.05265	34.033	0.87089	59.6737	4.29604	84.6105	6.8629
6.27138	-0.0531	34.1262	1.82208	59.743	4.20117	84.6803	6.81562
6.36579	-0.05355	34.2206	1.86287	59.8119	4.12595	84.7503	6.77356
6.45943	-0.05351	34.314	1.85955	59.8819	4.04984	84.8201	6.71046
6.55244	-0.05274	34.4086	1.85805	59.9518	3.98567	84.8895	6.6593
6.64697	-0.00122	34.5032	1.85564	60.0207	3.92207	84.9595	6.59213
6.74096	0.31853	34.5976	1.85119	60.0901	3.86257	85.0293	4.58622
6.83433	0.50251	34.6916	1.84896	60.16	1.11217	85.0983	-0.48118
6.92788	0.52942	34.7846	1.84659	60.2304	-0.58707	85.1683	-1.10181
7.02064	0.54278	34.8789	1.84159	60.3001	-0.56313	85.2383	-1.07775
7.1146	0.5527	34.9721	1.83682	60.3704	-0.32963	85.3086	-0.91016
7.20907	0.55947	35.0653	1.62181	60.4395	-0.09127	85.3776	-0.74872
7.30298	0.56296	35.1599	0.49699	60.51	0.11021	85.4473	-0.60017
7.396	0.56598	35.2531	0.10814	60.5795	0.28409	85.5173	-0.46811
7.48925	0.56932	35.3477	0.04616	60.649	0.43169	85.5875	-0.35082
7.58198	0.52156	35.4407	0.0111	60.7188	0.56509	85.6575	-0.24509
7.67554	0.03179	35.5337	-0.01228	60.7887	0.67959	85.726	-0.15442
7.76997	-0.05797	35.6277	-0.02738	60.859	0.78596	85.7966	-0.05997
7.86394	-0.06067	35.7219	-0.04147	60.928	0.87785	85.8669	0.02151
7.95821	-0.06116	35.8152	-0.05166	60.9977	0.9712	85.9363	0.10933
8.05227	-0.06121	35.9079	-0.05657	61.068	1.04718	86.0056	0.18616
8.14609	-0.06136	36.0014	0.31655	61.137	1.13194	86.0757	0.40473
8.23963	-0.06109	36.0949	1.74164	61.2071	1.29938	86.1447	1.00992
8.33362	-0.06063	36.1879	1.88411	61.277	1.78495	86.2147	4.16359
8.42806	-0.0602	36.2821	1.88279	61.3468	3.90274	86.2851	6.46888
8.5223	-0.05904	36.3768	1.87938	61.4163	4.54577	86.3547	6.78834
8.61559	-0.04835	36.4715	1.87874	61.4858	4.56181	86.4247	6.86422
8.7089	0.1352	36.5651	1.87661	61.5549	4.50831	86.4947	6.87947
8.80287	0.45585	36.6593	1.8732	61.6249	4.42103	86.5639	6.84016
8.8959	0.51578	36.7529	1.87115	61.6943	4.34732	86.6338	6.79762
8.98913	0.5333	36.8473	1.86947	61.764	4.25884	86.7044	6.72334
9.08295	0.54462	36.9413	1.86501	61.8333	4.1886	86.7744	6.6666
9.17596	0.55318	37.0351	1.80435	61.9026	4.11111	86.8427	6.58067
9.26897	0.55941	37.1289	0.98134	61.972	4.04883	86.9125	6.51975
9.36315	0.56408	37.2219	0.18822	62.0425	3.97165	86.9826	6.43164
9.45718	0.56825	37.3159	0.07881	62.1115	3.62528	87.0524	2.17729
9.55106	0.57037	37.4105	0.04002	62.1809	-0.03335	87.1221	-0.98614
9.64511	0.17935	37.5038	0.01155	62.2506	-0.53603	87.1922	-1.29508
9.73797	-0.04816	37.5974	-0.00919	62.32	-0.4015	87.2623	-1.18386
9.83166	-0.05563	37.6914	-0.02156	62.3902	-0.1531	87.332	-0.9851
9.92496	-0.05779	37.7853	-0.03306	62.46	0.0708	87.4013	-0.82603
10.0193	-0.05821	37.8779	-0.04388	62.5304	0.26085	87.4713	-0.66327
10.1139	-0.05801	37.972	-0.03897	62.6	0.42386	87.5405	-0.54039
10.2075	-0.05823	38.0659	1.35287	62.67	0.57027	87.6103	-0.40122
10.3006	-0.0577	38.159	1.8842	62.7402	0.69924	87.6803	-0.2882
10.394	-0.05688	38.2531	1.90048	62.8087	0.81375	87.7503	-0.16276
10.4884	-0.05604	38.3463	1.89821	62.879	0.91903	87.8199	-0.06584
10.5831	-0.05272	38.4406	1.8938	62.9492	1.01011	87.89	0.03884
10.6773	0.05092	38.5349	1.89216	63.0192	1.09499	87.9595	0.12098
10.7703	0.40133	38.6279	1.8907	63.0893	1.16782	88.0293	0.2179
10.8639	0.5086	38.7223	1.88616	63.1593	1.27373	88.099	0.44802
10.9578	0.52931	38.8165	1.88293	63.2281	1.52884	88.1683	1.15544
11.051	0.54042	38.9109	1.88224	63.2981	2.70057	88.2385	4.53497
11.1442	0.54819	39.005	1.87156	63.368	4.45002	88.3083	6.51729
11.2377	0.55422	39.0999	1.51931	63.438	4.59952	88.3775	6.76692
11.332	0.55904	39.1939	0.38735	63.5072	4.55177	88.4473	6.82216
11.426	0.56273	39.2881	0.1221	63.5772	4.47073	88.5175	6.807
11.5184	0.56626	39.3811	0.06416	63.647	4.37151	88.5874	6.77697
11.6123	0.44566	39.4749	0.0327	63.7165	4.28985	88.6576	6.72941
11.7061	-0.01089	39.5686	0.0116	63.7861	4.20679	88.7266	6.67512
11.799	-0.05946	39.6626	-0.00782	63.855	4.14527	88.7965	6.61241
11.893	-0.06209	39.7576	-0.0211	63.9248	4.07485	88.8668	6.54372
11.986	-0.06417	39.8516	-0.02869	63.994	4.02041	88.937	6.4792
12.0792	-0.06492	39.9455	-0.0322	64.0642	3.95586	89.0062	6.41156
12.1728	-0.06526	40.0394	1.28657	64.134	2.56414	89.0762	2.31267
12.2672	-0.06573	40.1326	1.89666	64.204	-0.36424	89.1456	-1.00651
12.3605	-0.06576	40.2259	1.91499	64.2732	-0.47951	89.2157	-1.32587
12.4541	-0.06548	40.3192	1.91185	64.3426	-0.28232	89.2853	-1.22535
12.549	-0.0652	40.4135	1.91039	64.4123	-0.03701	89.3543	-1.04611
12.643	-0.04467	40.5079	1.90748	64.4823	0.16087	89.4247	-0.8913
12.7361	0.19534	40.6021	1.90294	64.5527	0.34043	89.4943	-0.73574
12.8294	0.46897	40.696	1.90093	64.6221	0.48588	89.5637	-0.60804
12.923	0.51169	40.7897	1.90016	64.6926	0.62218	89.6338	-0.47133
13.0166	0.52825	40.8832	1.89639	64.7616	0.73189	89.7033	-0.36598
13.1104	0.53906	40.9772	1.88866	64.8319	0.84084	89.7735	-0.24926
13.2034	0.54634	41.0711	1.59289	64.9011	0.92952	89.8431	-0.15689
13.297	0.55222	41.1653	0.44633	64.9713	1.01731	89.9121	-0.04917
13.392	0.55684	41.2596	0.14202	65.0406	1.09026	89.9822	0.03401
13.485	0.56021	41.3528	0.08472	65.1115	1.16516	90.0523	0.18569
13.578	0.53038	41.446	0.05052	65.1803	1.30197	90.1227	0.58729
13.6711	0.04871	41.5401	0.02619	65.2508	1.67195	90.1917	2.37937
13.7657	-0.06078	41.6339	0.01096	65.3195	3.52688	90.2628	6.00219
13.8587	-0.06366	41.7269	-0.00318	65.39	4.55221	90.3322	6.65305
13.9529	-0.06535	41.8206	-0.01487	65.4588	4.59409	90.4009	6.78028
14.0463	-0.06658	41.9141	-0.02119	65.5287	4.54842	90.4708	6.82784
14.1397	-0.06682	42.0079	0.69608	65.5986	4.47509	90.5403	6.81126
14.2333	-0.067	42.1011	1.8611	65.6684	4.38907	90.6105	6.79535
14.3276	-0.06727	42.1949	1.93077	65.7385	4.30406	90.6801	6.73793
14.4206	-0.0669	42.289	1.92822	65.8074	4.21784	90.7504	6.69066
14.5154	-0.0662	42.3833	1.92213	65.8773	4.13807	90.8193	6.61449
14.609	-0.06147	42.4775	1.91803	65.947	4.05439	90.8898	6.55376
14.702	0.07469	42.5707	1.9154	66.0173	3.97759	90.9598	6.47162
14.795	0.41718	42.6649	1.90971	66.0871	3.89415	91.0289	4.82724
14.8888	0.50237	42.7575	1.90612	66.156	1.09834	91.0983	-0.55906
14.982	0.52187	42.8525	1.90489	66.226	-0.56483	91.1683	-1.24932
15.0765	0.53375	42.9469	1.90007	66.2967	-0.5282	91.2379	-1.23748
15.17	0.54196	43.0401	1.79543	66.3676	-0.27885	91.3079	-1.05085
15.2634	0.54816	43.1339	0.81254	66.4378	-0.03057	91.3783	-0.89055
15.3561	0.55363	43.227	0.1884	66.507	0.17419	91.4483	-0.72125
15.4498	0.55765	43.3209	0.09959	66.577	0.35268	91.5183	-0.58302
15.5439	0.56034	43.4149	0.06344	66.6461	0.50275	91.5883	-0.44073
15.6369	0.23341	43.5093	0.03729	66.7157	0.64435	91.6583	-0.32486
15.7308	-0.05264	43.6022	0.01664	66.7862	0.76069	91.7273	-0.20435
15.8245	-0.06309	43.6966	0.00359	66.8557	0.87589	91.7976	-0.10383
15.9175	-0.06469	43.7901	-0.00723	66.9255	0.96741	91.8671	-0.00379
16.011	-0.06574	43.8841	-0.01796	66.9945	1.06114	91.9371	0.08631
16.1047	-0.06656	43.9781	0.09136	67.0651	1.13346	92.007	0.18161
16.199	-0.06673	44.0721	1.64528	67.135	1.22295	92.0768	0.38606
16.2926	-0.06694	44.1651	1.92731	67.2047	1.40789	92.1463	0.98718
16.3856	-0.06726	44.2597	1.93031	67.274	2.00247	92.2165	4.00301
16.479	-0.06698	44.3541	1.92804	67.344	4.17275	92.2861	6.43003
16.573	-0.06586	44.4479	1.92313	67.4142	4.63185	92.3558	6.74229
16.6662	0.00859	44.5423	1.91835	67.4833	4.62257	92.4253	6.82528
16.759	0.34968	44.6371	1.91667	67.553	4.55581	92.4944	6.85854
16.8531	0.49215	44.73	1.91385	67.6234	4.46448	92.564	6.85465
16.946	0.5169	44.824	1.90926	67.693	4.3801	92.6344	6.83684
17.0395	0.53003	44.9189	1.90685	67.763	4.28713	92.7031	6.79156
17.1325	0.53883	45.013	1.89075	67.8326	4.21936	92.7736	6.75186
17.2263	0.54523	45.1059	1.41217	67.9016	4.14439	92.8432	6.68791
17.32	0.55021	45.2002	0.3306	67.9717	4.08679	92.9128	6.64016
17.4126	0.55396	45.2949	0.1336	68.0413	4.02142	92.9823	6.56901
17.5058	0.55649	45.3879	0.08231	68.1103	3.95479	93.0517	4.37675
17.6007	0.44295	45.4819	0.05098	68.18	0.68193	93.1216	-0.58265
17.6946	-0.01487	45.5753	0.03174	68.2501	-0.50578	93.1905	-1.2102
17.7877	-0.06686	45.6699	0.01578	68.32	-0.44919	93.2608	-1.20499
17.8821	-0.0681	45.7638	0.00214	68.39	-0.20767	93.3303	-1.0156
17.9752	-0.06922	45.8574	-0.00605	68.46	0.0187	93.3996	-0.86175
18.0683	-0.07009	45.9515	-0.01305	68.5286	0.21834	93.4696	-0.69756
18.1612	-0.07037	46.0458	1.13987	68.5993	0.38818	93.5399	-0.5709
18.2551	-0.0702	46.1393	1.91562	68.6683	0.53755	93.6096	-0.43608
18.3483	-0.07028	46.2336	1.94659	68.738	0.66873	93.6792	-0.33547
18.442	-0.0697	46.3284	1.94318	68.8082	0.78798	93.7487	-0.22178
18.5353	-0.06857	46.4226	1.93968	68.877	0.89509	93.8183	-0.13406
18.6284	-0.05537	46.5172	1.93913	68.947	0.98813	93.8882	-0.02994
18.722	0.1487	46.6099	1.93581	69.0166	1.07548	93.9585	0.04633
18.816	0.45344	46.705	1.93031	69.0869	1.15304	94.0284	0.1512
18.91	0.50468	46.799	1.92767	69.1571	1.26072	94.0985	0.42879
19.0029	0.52038	46.8925	1.92476	69.226	1.5073	94.1683	1.36491
19.0964	0.53023	46.9858	1.91371	69.2967	2.56856	94.2383	5.15939
19.1904	0.53722	47.0784	1.59453	69.3667	4.45608	94.3073	6.58351
19.2837	0.54271	47.1727	0.46184	69.4367	4.6244	94.3776	6.80596
19.377	0.54733	47.2659	0.16489	69.5061	4.5771	94.4482	6.89189
19.47	0.55064	47.3593	0.105	69.5753	4.50421	94.5173	6.90856
19.5643	0.54878	47.453	0.07417	69.6452	4.41718	94.5883	6.91405
19.6575	0.12325	47.5471	0.04979	69.714	4.34543	94.6585	6.8809
19.7509	-0.06754	47.6411	0.03265	69.784	4.27437	94.7283	6.85617
19.8439	-0.0728	47.7359	0.02215	69.8553	4.22006	94.7969	6.80293
19.9369	-0.07417	47.8289	0.01032	69.9252	4.15904	94.8677	6.76039
20.0319	-0.07475	47.9225	0.00141	69.996	4.10776	94.9373	6.69303
20.1254	-0.07503	48.0169	0.72978	70.0653	4.05268	95.0077	6.46745
20.2194	-0.07466	48.1099	1.89098	70.1344	3.1555	95.0777	0.57336
20.3142	-0.07409	48.2032	1.95819	70.2048	-0.18758	95.1473	-0.96757
20.4073	-0.07353	48.2965	1.95728	70.274	-0.45014	95.2171	-1.13857
20.5007	-0.07249	48.3902	1.9515	70.3439	-0.28662	95.2868	-0.99258
20.5942	-0.06764	48.484	1.94573	70.414	-0.03682	95.3565	-0.83361
20.6881	0.06336	48.5792	1.94268	70.483	0.17236	95.4258	-0.68951
20.782	0.40755	48.6729	1.939	70.5531	0.36683	95.4956	-0.56228
20.8753	0.49354	48.7655	1.93299	70.6223	0.52094	95.5653	-0.44906
20.9683	0.51154	48.8601	1.93045	70.6919	0.66785	95.635	-0.34002
21.0622	0.52241	48.9526	1.92622	70.7612	0.7864	95.704	-0.24575
21.156	0.53034	49.0472	1.81899	70.832	0.90792	95.7735	-0.15253
21.249	0.53572	49.1421	0.82259	70.9009	1.00385	95.8439	-0.07541
21.342	0.53989	49.2359	0.21182	70.9709	1.10289	95.913	0.00872
21.4363	0.54353	49.3289	0.12269	71.0409	1.17994	95.9829	0.07143
21.5311	0.54589	49.4239	0.08367	71.1109	1.26262	96.0523	0.20104
21.6252	0.37809	49.5173	0.06007	71.18	1.36134	96.1216	0.58833
21.7189	-0.04619			71.25	1.62016	96.1915	2.38146
21.813	-0.07784			71.3201	2.70834	96.2615	6.0219
21.9062	-0.07942			71.3897	4.53869	96.3316	6.68043
21.999	-0.08035			71.4587	4.67417	96.4005	6.83362
22.0926	-0.07984			71.529	4.61745	96.4703	6.90913
22.1863	-0.07932			71.5992	4.50787	96.5395	6.91017
22.2802	-0.07853			71.6689	4.39816	96.6098	6.90979
22.3742	-0.07756			71.7383	4.28284	96.6788	6.86782
22.4672	-0.0771			71.808	4.18336	96.7488	6.84092
22.5612	-0.07625			71.877	4.08887	96.8183	6.78436
22.6547	-0.02542			71.9473	4.0043	96.888	6.74542
22.749	0.28908			72.0159	3.92321	96.957	6.68374
22.8429	0.47662			72.086	3.84704	97.0267	6.40957
				72.1561	2.04005	97.0973	0.47464
				72.225	-0.55643	97.1673	-1.00916
				72.2954	-0.59471	97.2371	-1.18661
				72.3651	-0.35136	97.3062	-1.05274
				72.4341	-0.07794	97.3756	-0.90684
				72.5042	0.14476	97.4453	-0.76966
				72.574	0.32938	97.5156	-0.64659
				72.644	0.48071	97.5853	-0.53092
				72.714	0.61997	97.6551	-0.42282
				72.784	0.73776	97.725	-0.32628
				72.853	0.85259	97.7944	-0.23798
				72.9236	0.94638	97.8646	-0.15452
				72.993	1.04251	97.9341	-0.06149
				73.0619	1.11944	98.0039	0.01383
				73.1326	1.20135	98.0733	0.14694
				73.202	1.33247	98.1429	0.53262
				73.2723	1.68162	98.2127	2.24115
				73.342	3.4245	98.2823	5.9444
				73.4112	4.59642	98.3525	6.67768
				73.481	4.6419	98.4211	6.84745
				73.551	4.58865	98.4913	6.92741
				73.6212	4.49467	98.5603	6.94655
				73.69	4.41124	98.6302	6.96948
				73.7603	4.31448	98.7002	6.95422
				73.83	4.23648	98.77	6.9492
				73.8997	4.14875	98.8387	6.90951
				73.969	4.07997	98.9093	6.88847
				74.0387	3.99799	98.9793	6.83959
				74.1099	3.93161	99.0483	3.86081
				74.1795	0.95813	99.118	-0.39184
				74.25	-0.50723	99.1882	-0.95544
				74.3191	-0.4562	99.2572	-0.97496
				74.3893	-0.20729	99.328	-0.84166
				74.4593	0.02343	99.3982	-0.7312
				74.5293	0.23678	99.4683	-0.60453
				74.599	0.40902	99.538	-0.50382
				74.6689	0.56869	99.6089	-0.39184
				74.739	0.6976	99.6782	-0.30989
				74.8094	0.82372	99.7489	-0.21373
				74.879	0.92301	99.8175	-0.14088
				74.9486	1.02495	99.8876	-0.05722
				75.0193	1.10276	99.9565	0.00369
				75.0889	1.18607	100.027	0.07399
				75.1587	1.26445	100.096	0.28422
				75.228	1.46947	100.166	0.9905
				75.2994	2.14969	100.237	4.47689
				75.3692	4.32421	100.306	6.49313
				75.4398	4.6887	100.376	6.81865
				75.5084	4.69539	100.446	6.94646
				75.5788	4.62718	100.516	7.00406
				75.6483	4.55701	100.585	7.02613
				75.717	4.46429	100.655	7.02139
				75.787	4.38553	100.725	7.00112
12.4041	0.08947	57.4381	0.14677	102.339	39.3103	147.387	0.20736
12.4442	0.09061	57.4824	0.14927	102.378	12.0908	147.428	0.02444
12.4863	0.07822	57.5234	0.12039	102.42	2.72985	147.47	0.17224
12.5263	0.0731	57.5632	0.12085	102.467	0.5831	147.51	0.03467
12.5733	0.12483	57.6026	0.20941	102.506	0.29729	147.552	0.17394
12.6187	-0.04104	57.6499	24.2902	102.547	0.0681	147.598	-0.00853
12.6591	0.04786	57.6955	12.3905	102.588	0.0739	147.639	0.11869
12.7002	-0.02001	57.7359	4.20255	102.629	0.16496	147.68	8.88781
12.7402	0.05048	57.7763	0.84287	102.669	-0.02149	147.721	56.1314
12.7872	0.01955	57.8177	0.24329	102.708	0.23522	147.762	14.6176
12.8307	-0.11391	57.8619	0.13949	102.756	0.28967	147.808	3.40617
12.8707	0.09106	57.9051	0.11471	102.802	0.19475	147.851	1.07582
12.9117	0.08458	57.9451	0.11198	102.842	0.19349	147.893	0.33128
12.9524	0.06355	57.9848	0.10266	102.881	0.11903	147.934	0.18861
12.9981	0.01137	58.0241	0.09254	102.922	0.17587	147.975	0.20793
13.042	-0.15393	58.0716	0.13051	102.968	0.07367	148.018	0.12597
13.0821	-0.64915	58.1178	0.07151	103.014	0.19384	148.063	0.30559
13.1236	-7.81699	58.1588	0.07731	103.053	0.18053	148.105	0.31775
13.1632	-8.72183	58.1998	0.07594	103.093	0.27921	148.144	0.26887
13.2097	-3.04544	58.2408	0.12039	103.133	0.10357	148.185	0.18235
13.2529	-1.97304	58.286	0.17383	103.18	0.25682	148.232	0.15484
13.2937	0.07003	58.33	0.09572	103.225	0.14609	148.274	0.11312
13.334	0.03354	58.3704	0.14018	103.267	0.10539	148.314	0.1404
13.375	0.03649	58.4105	0.1337	103.306	-0.15211	148.354	0.08595
13.4218	0.05275	58.452	0.07878	103.345	-3.16572	148.394	0.16917
13.4643	0.02967	58.4971	0.11369	103.392	-11.523	148.44	0.17894
13.5053	0.0598	58.5421	0.10709	103.437	-22.8689	148.487	0.29934
13.5458	0.05537	58.5819	0.12301	103.478	-9.3064	148.527	0.23715
13.5861	0.10721	58.6234	0.08856	103.518	-3.96051	148.568	0.23954
13.634	0.0781	58.6632	-2.30477	103.558	-1.72054	148.607	0.09902
13.676	0.14268	58.7086	-8.09814	103.603	-0.42701	148.653	0.11494
13.716	0.17701	58.7496	-24.1465	103.65	0.13836	148.698	-0.89415
13.7561	0.15677	58.7906	-6.6733	103.69	-0.33697	148.738	-7.31211
13.7965	0.11494	58.8322	-1.87208	103.731	0.5756	148.778	-24.5297
13.8445	0.11346	58.8712	-0.26193	103.771	0.17928	148.818	-38.7456
13.8903	0.13551	58.9121	-0.32026	103.817	0.14177	148.865	-11.9965
13.9309	0.16621	58.9528	-0.25216	103.862	0.04809	148.91	-2.99758
13.9709	0.67917	58.998	0.07731	103.902	0.2741	148.95	-1.29376
14.0105	12.8821	59.0408	0.03058	103.942	0.12972	148.992	-0.10812
14.056	1.692	59.082	0.07174	103.982	0.11971	149.032	0.04638
14.1	0.62971	59.122	0.06639	104.028	0.05571	149.076	-0.43326
14.1397	0.53137	59.163	0.04593	104.074	0.26068	149.121	-0.05627
14.1797	0.10186	59.2087	0.04673	104.114	0.06139	149.162	-0.16007
14.2203	0.04695	59.2526	0.13233	104.154	0.07481	149.203	0.13222
14.267	0.11096	59.2938	0.09368	104.194	0.16939	149.242	0.1429
14.312	0.09277	59.3342	0.08288	104.241	0.09811	149.288	-0.37335
14.3514	0.05684	59.3746	0.11926	104.287	-0.03899	149.332	0.0648
14.3919	0.07833	59.4206	0.11335	104.326	36.4677	149.373	0.02149
14.432	0.04763	59.4642	0.08367	104.367	22.5657	149.413	0.11198
14.4783	0.07287	59.5039	0.10266	104.407	5.31077	149.453	0.24363
14.5234	0.11767	59.5438	0.08731	104.454	1.14642	149.501	0.07549
14.5648	0.0482	59.5838	0.09857	104.494	0.25034	149.542	0.2932
14.6045	0.06617	59.6302	8.62315	104.535	0.2284	149.583	0.21623
14.6445	-0.00648	59.6758	25.7472	104.576	0.22987	149.624	0.21282
14.691	0.0598	59.716	7.80631	104.616	0.22351	149.666	0.97009
14.7359	0.08754	59.7553	2.10957	104.656	0.13347	149.711	66.495
14.7769	0.06196	59.7943	0.3547	104.697	0.23942	149.756	20.7943
14.8179	0.04616	59.8413	0.1686	104.737	0.19054	149.797	6.08634
14.859	-0.005	59.8868	0.10323	104.777	0.12187	149.836	1.0557
14.905	0.01626	59.9303	0.11369	104.819	0.20918	149.878	0.61118
14.9467	0.07083	59.9703	0.16018	104.864	0.10971	149.923	0.30013
14.9888	0.03047	60.0113	0.05821	104.905	0.00455	149.967	0.25932
15.0285	0.02035	60.0543	0.08708	104.947	0.10516	150.007	0.24397
15.0698	-0.32048	60.0987	0.12551	104.986	0.23965	150.048	0.2276
15.115	-1.2368	60.1404	0.0955	105.031	0.10812	150.088	0.08072
15.1613	-9.90656	60.1805	0.11892	105.074	0.14427	150.135	0.11119
15.2016	-4.47619	60.2207	0.12744	105.114	0.26853	150.177	0.09129
15.2419	-3.03123	60.2655	0.12392	105.154	0.20179	150.218	0.10266
15.2812	-0.52137	60.3097	0.15336	105.194	0.15143	150.258	0.10823
15.3284	0.0764	60.3501	0.13063	105.241	0.10834	150.299	0.25909
15.3714	0.05844	60.39	0.06719	105.285	0.07003	150.346	0.30832
15.4114	0.04616	60.4308	0.0972	105.327	-0.88482	150.39	0.20998
15.4518	0.03956	60.4779	0.13574	105.367	-4.65764	150.431	0.18417
15.492	0.02035	60.5222	0.13995	105.406	-21.632	150.471	0.22374
15.5369	0.02353	60.5632	0.12471	105.454	-18.9983	150.512	0.16564
15.5845	0.04661	60.6042	0.14836	105.499	-6.56553	150.558	0.1985
15.6245	0.05707	60.6459	-0.29149	105.54	-0.92109	150.603	0.17337
15.6659	0.12255	60.69	-4.00371	105.58	-0.72816	150.643	0.26989
15.7069	0.1985	60.7336	-15.7741	105.621	-0.45861	150.684	0.14711
15.752	0.17553	60.7759	-17.9222	105.667	0.1105	150.724	-5.31566
15.7955	0.10107	60.8169	-3.74155	105.709	0.46293	150.769	-17.3812
15.8357	0.10039	60.8574	-0.51944	105.749	-0.37721	150.812	-48.0439
15.876	0.08856	60.9033	-0.63699	105.789	0.00125	150.853	-14.9876
15.9159	0.15314	60.9457	0.10812	105.83	0.05389	150.894	-5.11795
15.9562	0.17837	60.9854	0.04866	105.877	0.2716	150.934	-1.5184
15.9961	13.0807	61.0264	0.0033	105.918	0.16064	150.982	-0.44133
16.0417	6.17626	61.0674	0.13688	105.957	0.21407	151.026	-0.01421
16.0892	1.28853	61.1131	0.07708	105.999	0.18713	151.065	0.17894
16.1292	0.34458	61.1578	0.08629	106.039	0.04104	151.106	0.14518
16.1699	0.14552	61.1979	0.11619	106.081	-0.16928	151.147	0.11153
16.2103	0.21487	61.2381	0.06901	106.122	0.11926	151.194	0.1296
16.2562	0.12903	61.2781	0.11698	106.167	0.12722	151.234	-0.22908
16.2996	0.04547	61.3241	0.09618	106.209	0.103	151.274	0.11903
16.3393	0.00887	61.3698	0.12744	106.25	0.01569	151.316	0.0731
16.3803	0.0415	61.4102	0.10289	106.291	0.14268	151.355	0.10516
16.42	0.04854	61.4505	0.10266	106.332	35.5459	151.394	-0.10948
16.4663	0.05468	61.4919	0.11153	106.379	24.0974	151.435	0.26216
16.5119	0.06412	61.5371	0.11778	106.419	6.15057	151.483	0.31878
16.5512	0.02774	61.5808	0.10584	106.459	1.37936	151.528	0.26887
16.5926	0.05798	61.6208	3.16732	106.5	0.36027	151.568	0.2226
16.6328	0.00568	61.6608	27.8283	106.542	-0.02137	151.607	0.30082
16.6802	0.07003	61.701	9.05959	106.583	0.05355	151.647	0.14859
16.7252	-0.06048	61.7483	2.68267	106.624	0.13699	151.693	0.31275
16.7665	0.03536	61.7941	0.49147	106.667	0.16132	151.738	65.9795
16.8062	0.02967	61.8344	0.16951	106.711	0.2301	151.779	18.9059
16.846	0.09175	61.8742	0.13108	106.753	0.19588	151.82	5.69389
16.8925	-0.05593	61.9142	0.12847	106.795	0.15916	151.86	1.15199
16.9359	0.00625	61.9629	0.1537	106.834	0.11539	151.907	0.61982
16.9762	-0.00978	62.0039	0.08151	106.88	0.09538	151.95	0.29729
17.0162	-0.05502	62.0449	0.09561	106.923	0.06139	151.99	0.29252
17.0567	-0.20407	62.0854	0.09857	106.962	0.01216	152.03	0.20168
17.0967	-0.71043	62.1242	0.08174	107.005	-0.00387	152.069	0.19952
17.1387	-6.64068	62.1721	0.13642	107.046	0.07185	152.115	0.14973
17.1801	-9.09552	62.2159	0.11323	107.091	0.22453	152.162	0.21464
17.2247	-3.06454	62.2571	0.15484	107.135	0.30889	152.202	0.22681
17.2659	-3.53464	62.2963	0.14302	107.176	0.1512	152.243	0.24045
17.3059	-0.88289	62.3362	0.11789	107.216	0.19577	152.284	0.22305
17.346	-0.89881	62.3824	0.13961	107.256	0.11767	152.331	0.19702
17.3927	-1.11561	62.4295	0.1462	107.302	0.16109	152.374	0.12301
17.4363	-2.12015	62.4703	0.1055	107.346	-2.11139	152.414	0.15848
17.4764	-1.50476	62.5113	0.13642	107.387	-7.84962	152.453	0.10687
17.5164	-0.39586	62.5516	0.12665	107.427	-26.3118	152.493	0.13836
17.5563	-0.04468	62.5967	0.14006	107.467	-12.3778	152.541	0.21089
17.6022	0.11482	62.6387	0.11187	107.513	-5.18014	152.585	0.26546
17.6483	0.24602	62.6801	-2.42449	107.56	-1.52977	152.626	0.31901
17.6903	0.52887	62.7202	-8.09246	107.6	0.20839	152.669	0.28103
17.7313	1.26124	62.7622	-23.7659	107.642	0.59458	152.709	-1.44837
17.7718	2.20655	62.8074	-4.05066	107.683	0.01251	152.753	-7.97854
17.8159	2.25918	62.8502	-1.52204	107.726	0.18258	152.796	-32.2985
17.8589	0.25875	62.8921	-2.04705	107.771	0.0324	152.837	-39.5427
17.9	0.3447	62.9328	-0.22442	107.813	-0.03206	152.878	-10.8233
17.941	0.34561	62.9743	0.15325	107.854	0.30877	152.92	-1.90244
17.9813	9.03083	63.0178	0.09061	107.895	-0.02092	152.963	-1.82115
18.0282	7.33951	63.0629	0.07685	107.938	0.21498	153.008	-0.15348
18.0706	1.63254	63.104	0.06889	107.982	0.08743	153.048	0.10129
18.1108	0.34061	63.1459	0.08947	108.022	0.093	153.089	0.09777
18.1518	0.51796	63.1878	0.12153	108.063	0.07424	153.129	0.0382
18.1923	0.13949	63.2312	0.11414	108.104	0.23249	153.175	0.08572
18.2382	0.03001	63.2748	0.11471	108.151	0.30479	153.219	-0.30821
18.2839	0.24693	63.316	0.14563	108.195	0.16985	153.259	0.11926
18.324	0.06332	63.3554	0.1055	108.235	0.2226	153.298	0.06492
18.3646	0.00819	63.396	0.10857	108.275	0.17587	153.34	0.06969
18.4044	0.00387	63.442	0.12415	108.317	0.22669	153.386	0.15723
18.4503	-0.00284	63.4852	0.11698	108.362	41.4594	153.431	0.15575
18.4947	0.01819	63.5248	0.13836	108.405	13.8024	153.471	0.01637
18.5368	-0.06787	63.566	0.11505	108.446	3.45631	153.513	0.39711
18.5769	-0.22749	63.6063	0.1902	108.487	0.49806	153.553	-0.0681
18.6179	-0.3887	63.6536	21.3715	108.527	0.30582	153.6	0.20486
18.6622	-0.39233	63.6966	15.3466	108.572	0.25159	153.643	0.19327
18.7059	-0.48578	63.7385	4.66002	108.617	0.18304	153.683	0.52114
18.7459	-0.39415	63.7795	1.09526	108.658	0.0133	153.723	67.5235
18.7859	-0.64733	63.8209	0.25216	108.698	0.08856	153.764	19.6849
18.827	-0.45247	63.8687	0.12437	108.738	0.07287	153.811	4.25803
18.874	-0.38358	63.9142	0.1088	108.783	0.04979	153.854	0.84765
18.9175	-0.2608	63.9548	0.14302	108.829	0.21998	153.895	0.4859
18.9588	-0.16553	63.9957	0.1254	108.869	0.20782	153.935	0.38699
19.0005	0.15791	64.0348	0.09277	108.91	0.18781	153.975	0.22089
19.0407	0.08038	64.0818	0.11914	108.952	0.22499	154.023	0.22635
19.0841	-0.26739	64.1255	0.08356	108.996	0.216	154.066	0.47567
19.1289	-8.59347	64.1656	0.12346	109.039	-0.01955	154.106	0.32458
19.1704	-9.61506	64.2056	0.15302	109.08	0.08492	154.145	0.29752
19.2118	-2.09798	64.2465	0.07878	109.121	0.07162	154.186	0.16666
19.2527	-1.0657	64.2925	0.14666	109.163	-0.00966	154.232	0.24841
19.2959	0.0324	64.3377	0.16269	109.207	0.13654	154.276	0.15757
19.3404	0.0897	64.3784	0.12108	109.251	0.19361	154.317	0.12574
19.3805	0.11062	64.4201	0.12574	109.291	0.3397	154.357	0.18156
19.4215	0.08504	64.4611	0.12949	109.332	-1.00749	154.397	0.20736
19.4626	0.11755	64.5055	0.14211	109.374	-6.83588	154.443	0.23363
19.5082	0.14097	64.5481	0.12938	109.419	-23.1796	154.488	0.20816
19.5522	0.09288	64.5881	0.12585	109.462	-16.4242	154.53	0.30877
19.5938	0.1163	64.6279	0.00989	109.504	-6.33327	154.571	0.23465
19.6353	0.12517	64.6707	-3.80908	109.545	-1.50351	154.611	0.12994
19.6762	0.15928	64.7157	-12.2595	109.586	-0.44076	154.656	0.17371
19.7199	0.18724	64.7606	-19.6684	109.631	0.15768	154.7	-0.1786
19.7633	0.1678	64.8018	-3.09876	109.674	0.17371	154.74	-3.50906
19.8046	0.20236	64.8418	-0.67269	109.714	0.14768	154.78	-16.3466
19.8456	0.1645	64.882	-0.99396	109.755	0.11562	154.821	-47.6181
19.8865	0.20555	64.9285	-0.02126	109.797	0.08993	154.868	-14.3057
19.931	0.18167	64.9715	0.05446	109.842	0.02353	154.911	-4.42685
19.9739	0.36266	65.0128	0.04616	109.886	0.14666	154.952	-1.86378
20.0145	13.4481	65.0538	0.09697	109.928	0.17792	154.995	-0.40893
20.0559	1.78807	65.0943	0.07333	109.969	0.1985	155.035	0.13813
20.0962	0.61868	65.1399	0.11823	110.011	0.19315	155.079	0.05662
20.144	0.19656	65.1848	0.1121	110.055	-0.10982	155.122	0.12494
20.1867	0.34606	65.2258	0.10573	110.098	0.14859	155.162	-0.11653
20.2279	0.15928	65.2668	0.05173	110.138	0.05525	155.203	0.08993
20.2683	0.11016	65.309	0.12176	110.18	0.09413	155.243	0.62994
20.3096	0.10107	65.3522	0.05605	110.222	0.12255	155.29	0.30116
20.3534	0.06798	65.3945	0.11983	110.265	0.15916	155.333	0.2691
20.3964	0.03934	65.4358	0.08879	110.309	0.22396	155.374	0.17769
20.4384	0.05457	65.476	0.10186	110.349	38.2979	155.414	0.2002
20.4805	0.05502	65.5164	0.10664	110.391	19.1425	155.453	0.000568434
20.5216	0.08833	65.5642	0.09209	110.432	4.99335	155.501	0.32537
20.5642	0.0656	65.6052	0.10141	110.477	1.28296	155.546	0.44656
20.6094	0.13119	65.6478	19.577	110.52	0.13517	155.586	0.09265
20.6494	0.09845	65.6888	19.6702	110.562	-0.01785	155.627	0.46953
20.6904	0.05377	65.7291	5.38569	110.602	0.41564	155.667	0.40711
20.7322	-0.07014	65.7749	1.1014	110.642	0.201	155.714	63.1987
20.7763	0.01114	65.817	0.42428	110.69	0.17678	155.757	23.9429
20.8208	-0.00182	65.8579	0.06958	110.732	0.13392	155.797	8.63361
20.8611	0.10027	65.9001	0.09595	110.772	0.3422	155.838	1.50692
20.9021	0.07151	65.9412	0.10539	110.814	0.16234	155.879	0.50966
20.9431	0.12517	65.9857	0.12847	110.856	-0.00739	155.926	0.39267
20.9844	0.06003	66.03	0.09959	110.899	0.17815	155.97	0.25011
21.0247	-0.04684	66.0715	0.05434	110.943	0.13688	156.013	0.18872
21.0659	-0.42792	66.1135	0.09106	110.984	0.22499	156.054	0.15052
21.1089	-2.14675	66.1548	0.1254	111.024	0.13461	156.094	0.21544
21.1508	-8.61712	66.198	0.16439	111.066	0.17826	156.141	0.17724
21.1921	-2.75065	66.2404	0.14109	111.112	0.09686	156.185	0.26102
21.2337	-3.13253	66.2819	0.14791	111.155	-0.0108	156.227	0.21703
21.2764	-0.17076	66.3239	0.13063	111.196	0.12176	156.268	0.24761
21.3204	0	66.364	0.06844	111.237	0.26262	156.309	0.20304
21.3622	0.0158	66.4101	0.10493	111.279	0.08367	156.354	0.12528
21.3963	0.03274	66.4517	0.12858	111.324	-0.64415	156.399	0.11664
21.4363	-0.0158	66.4918	0.09879	111.366	-3.94721	156.439	0.12528
21.4763	0.0266	66.5334	0.09868	111.407	-15.749	156.48	0.17883
21.5163	0.02217	66.5744	0.06264	111.448	-19.5548	156.521	0.25352
21.5597	0.06162	66.6198	0.10812	111.49	-7.06189	156.566	0.2791
21.6027	0.07378	66.6646	-2.58171	111.534	-1.70644	156.61	0.26068
21.6437	0.15189	66.7062	-9.22569	111.578	-0.97009	156.65	0.29809
21.6849	0.19384	66.7472	-23.9871	111.619	-0.04889	156.689	0.06651
21.7263	0.21089	66.7882	-3.35046	111.66	-0.06276	156.73	-4.59602
21.7696	0.18701	66.8362	-1.39516	111.702	0.25136	156.772	-16.6818
21.8128	0.14427	66.8823	-0.6122	111.747	0.26262	156.813	-52.0209
21.8539	0.16735	66.9234	0.11789	111.79	0.28399	156.859	-15.1173
21.8939	0.14813	66.9642	0.05821	111.831	0.1404	156.903	-3.79214
21.9357	0.14427	67.0058	0.05741	111.874	0.21294	156.944	-1.60298
21.982	3.57647	67.0491	-0.0208	111.915	0.07594	156.985	-0.34095
22.0243	9.52923	67.0941	0.06696	111.956	0.14836	157.026	0.12994
22.0656	1.41074	67.1359	0.01626	112.001	0.04968	157.071	-0.17565
22.1066	0.66393	67.1778	0.13597	112.042	0.09413	157.116	0.04798
22.1461	0.07981	67.2181	0.1578	112.083	0.25739	157.156	0.08652
22.1946	0.05616	67.2615	0.15075	112.125	0.0274	157.197	0.3846
22.2364	0.15518	67.3056	0.10948	112.169	0.31469	157.239	0.23601
22.2779	0.05286	67.3467	0.07094	112.211	-0.03354	157.279	0.11937
22.3193	0.03274	67.3883	0.07628	112.253	0.20634	157.319	0.10118
22.3602	0.11778	67.4288	0.09993	112.293	0.19008	157.36	0.32526
22.404	0.08242	67.4739	0.08504	112.334	40.3971	157.404	0.02785
22.448	0.11732	67.516	0.1296	112.38	12.3952	157.444	0.30116
22.49	0.08254	67.557	0.12585	112.423	3.82056	157.485	0.55093
22.5303	0.1246	67.5987	0.1337	112.464	0.59288	157.526	0.13733
22.5713	0.06912	67.6403	9.06095	112.505	0.19713	157.572	0.13847
22.6123	0.0706	67.6836	28.0297	112.546	0.18144	157.615	0.34834
22.6525	-0.02012	67.7274	7.77243	112.592	0.1628	157.656	0.1728
22.6995	-0.03513	67.7701	1.86037	112.635	0.12221	157.698	37.4973
22.7418	0.02262	67.8121	0.49806	112.676	0.07344	157.74	33.6357
22.7832	0.00739	67.8522	0.18701	112.717	0.08686	157.783	11.1563
22.825	0.13085	67.8961	0.1163	112.758	0.07481	157.826	2.37969
22.866	0.11676	67.938	0.13517	112.803	0.08504	157.867	0.77193
22.91	0.07071	67.9808	0.16087	112.847	0.23226	157.908	0.38517
22.9547	0.02342	68.0218	0.14791	112.888	0.22033	157.948	0.19622
22.9959	0.01739	68.0624	0.07117	112.93	0.19429	157.993	0.20509
23.0362	-0.12085	68.1062	0.09459	112.971	0.1296	158.037	0.14813
23.0761	-0.50886	68.1504	0.11073	113.015	0.22294	158.078	0.10482
23.1219	-3.39594	68.1914	0.08481	113.059	0.0739	158.118	0.04218
23.1665	-8.37895	68.2328	0.13506	113.1	0.000113687	158.159	0.22283
23.2079	-3.00975	68.274	0.1761	113.141	-0.03297	158.205	0.22465
23.2494	-1.68427	68.3188	0.16882	113.177	0.08401	158.249	0.26398
23.2917	0.06889	68.3616	0.12483	113.225	0.13904	158.29	0.23488
23.3333	0.0565	68.4042	0.15029	113.27	0.32924	158.329	0.22726
23.378	0.02751	68.444	0.13233	113.31	0.25739	158.37	0.09436
23.4185	-0.01785	68.4878	0.07435	113.35	-1.00238	158.417	0.15814
23.4598	0.00864	68.529	0.13119	113.391	-6.09703	158.461	0.17326
23.5007	0.06776	68.5745	0.15382	113.437	-22.9359	158.502	0.17621
23.5455	0.09845	68.616	0.16928	113.482	-18.3724	158.543	0.19304
23.5887	0.1387	68.6562	-1.03512	113.523	-6.44718	158.585	0.13733
23.6305	0.13893	68.6974	-6.09771	113.565	-1.06604	158.628	0.13529
23.6719	0.17951	68.7401	-21.2589	113.606	-0.36152	158.673	0.12312
23.7129	0.31309	68.7842	-11.5735	113.649	-0.0216	158.713	-2.77316
23.7573	0.05139	68.8249	-2.23838	113.692	0.04957	158.754	-10.5849
23.7995	0.19531	68.8652	-0.22635	113.734	0.08299	158.796	-37.4929
23.841	0.17485	68.9074	-0.49522	113.775	0.1005	158.839	-25.059
23.8818	0.20123	68.9517	0.08276	113.815	0.07344	158.883	-7.02983
23.9227	0.28149	68.995	0.07299	113.861	0.08276	158.926	-1.05206
23.9667	0.19782	69.0362	0.10641	113.905	-0.09209	158.966	-0.89005
24.0118	15.5918	69.0784	0.07265	113.945	0.19861	159.007	-0.0349
24.0519	4.39684	69.1206	0.15677	113.986	0.36528	159.051	-0.17758
24.0922	1.05001	69.1639	0.1171	114.026	0.18747	159.094	0.17008
24.1333	0.13017	69.2077	0.10095	114.072	0.14938	159.136	0.05321
24.1783	0.1844	69.25	0.11596	114.117	0.0723	159.176	-0.0415
24.2236	0.13767	69.2922	0.09652	114.159	-0.09095	159.218	0.07321
24.2649	0.09572	69.3342	0.10334	114.199	0.02922	159.263	0.2799
24.3064	0.12926	69.3753	0.10903	114.24	0.15496	159.306	0.19349
24.3468	0.08868	69.4185	0.13949	114.286	0.15962	159.347	0.2367
24.3908	0.09459	69.4584	0.15234	114.329	31.8199	159.387	0.21942
24.4343	0.05218	69.5002	0.13972	114.372	23.3823	159.428	0.54013
24.4757	-0.02046	69.541	0.09345	114.414	6.36464	159.473	-0.02274
24.5161	0.06446	69.5864	0.11744	114.455	1.39835	159.52	0.08936
24.5561	0.06457	69.6305	5.45083	114.496	0.35698	159.56	-0.1844
24.6029	-0.05707	69.6707	27.9177	114.539	0.04707	159.602	0.34288
24.6453	0.11266	69.7115	9.34062	114.581	-0.00648	159.643	0.16871
24.6873	0.10027	69.7524	2.19006	114.622	0.05127	159.69	19.9181
24.7283	0.000909495	69.7995	0.41871	114.663	0.17212	159.735	41.8966
24.7699	0.06526	69.8429	0.24079	114.707	0.05252	159.776	16.4646
24.8139	0.11948	69.8837	0.06332	114.752	0.12392	159.816	2.97075
24.8564	0.02046	69.9246	0.13392	114.796	0.04479	159.857	0.7268
24.899	-0.01444	69.9648	0.13506	114.837	0.04309	159.903	0.3007
24.94	-0.05264	70.0108	0.09038	114.879	0.02228	159.952	0.20304
24.982	0.00136	70.0536	0.10687	114.919	0.11539	159.996	0.13176
25.0251	0.05821	70.0943	0.14666	114.962	0.11335	160.037	0.2691
25.0687	-0.17553	70.1348	0.13108	115.004	0.16576	160.078	0.13961
25.1103	-1.11061	70.1759	0.16007	115.044	0.18167	160.122	0.25193
25.1506	-5.8842	70.2219	0.16144	115.085	0.20259	160.164	0.20202
25.1916	-10.7179	70.2648	0.11323	115.129	0.20486	160.204	0.17621
25.2365	-3.08512	70.3078	0.13608	115.174	0.01125	160.245	0.2359
25.28	-1.16131	70.3499	0.13074	115.216	-0.02831	160.286	0.2766
25.32	-0.00716	70.391	0.13461	115.257	-0.09697	160.331	0.25125
25.362	0.0058	70.4323	0.12176	115.298	0.08572	160.376	0.19702
25.4042	0.08038	70.4777	0.16087	115.342	-1.02091	160.417	0.15541
25.4487	0.09902	70.519	0.15746	115.385	-5.26643	160.458	0.17678
25.492	0.07969	70.561	0.18804	115.427	-22.4163	160.498	0.2326
25.5335	0.06287	70.6035	0.15484	115.469	-16.7423	160.542	0.20282
25.5746	0.01398	70.6446	0.09175	115.51	-6.76141	160.587	0.28763
25.616	0.000227374	70.6886	-2.69051	115.554	-1.3797	160.628	0.22374
25.6599	0.00819	70.73	-9.46534	115.598	-0.30604	160.669	0.19668
25.703	0.11732	70.771	-23.4426	115.638	-0.04832	160.71	-0.99544
25.7437	0.17008	70.813	-3.64082	115.679	-0.0955	160.754	-7.35076
25.7851	0.21441	70.8548	-1.40801	115.721	0.10721	160.799	-28.9527
25.8265	0.27137	70.8981	-1.08764	115.765	0.10948	160.839	-42.0845
25.871	0.24454	70.9393	-0.36323	115.807	-0.03115	160.881	-12.3708
25.9147	0.20248	70.9795	0.15848	115.849	0.01114	160.923	-1.95507
25.9557	0.11039	71.0215	-0.07731	115.891	0.07526	160.967	-1.59707
25.9967	12.4003	71.0666	0.08981	115.933	0.06366	161.011	-0.1927
26.0374	4.03691	71.1102	0.04934	115.977	0.03456	161.052	0.17462
26.0818	0.91234	71.1522	0.098	116.02	-0.01364	161.093	0.30047
26.1254	0.40393	71.1944	0.10323	116.06	0.00966	161.133	0.09652
26.1665	0.18485	71.2356	0.15166	116.101	0.11744	161.177	0.0083
26.2081	0.16109	71.278	0.17815	116.141	0.16121	161.22	0.18747
26.2488	0.07321	71.3228	0.11812	116.188	0.19384	161.262	0.12972
26.2936	-0.0316	71.3642	0.06514	116.232	0.16905	161.303	0.03877
26.3366	-0.02933	71.4055	0.1271	116.273	0.06162	161.344	0.06719
26.3787	-0.00637	71.4474	0.05161	116.314	0.06878	161.388	0.17099
26.4198	0.054	71.4904	0.10812	116.356	40.528	161.432	0.23647
26.4609	0.147	71.5327	0.14415	116.4	12.7336	161.473	0.3788
26.5059	0.108	71.5729	0.15302	116.448	4.00803	161.514	-0.25341
26.5489	0.0922	71.6144	0.18576	116.488	0.7326	161.555	0.11369
26.5899	0.05309	71.6564	19.5807	116.529	0.21203	161.599	0.18429
26.632	0.05627	71.6998	21.2378	116.571	-0.0922	161.644	0.17201
26.674	-0.01398	71.7443	5.9398	116.617	0.05207	161.684	4.0128
26.717	-0.02467	71.7864	1.324	116.661	0.11539	161.726	56.7926
26.7601	-0.01023	71.8284	0.43894	116.702	0.18986	161.767	18.7699
26.8022	0.04957	71.8694	0.10402	116.743	0.17315	161.811	3.899
26.8428	0.00375	71.9116	0.0648	116.785	0.18485	161.856	0.85311
26.8845	0.12608	71.9544	0.14848	116.827	0.22612	161.897	0.39324
26.9275	0.11062	71.9952	0.18645	116.872	0.0415	161.939	0.24147
26.9727	0.0847	72.0376	0.16007	116.915	0.05298	161.981	0.18122
27.0138	0.00375	72.0786	0.14018	116.956	0.05593	162.022	0.21748
27.0558	-0.19054	72.1229	0.10391	116.997	0.04388	162.065	0.22533
27.098	-0.57025	72.1658	0.10834	117.039	0.08606	162.106	0.18031
27.141	-6.98412	72.2067	0.09766	117.083	0.21566	162.147	0.20009
27.1836	-7.63123	72.2489	0.11437	117.126	0.24943	162.188	0.2367
27.2253	-3.70676	72.29	0.18701	117.167	0.20975	162.234	0.17292
27.2666	-0.15723	72.3339	0.14325	117.208	0.20759	162.277	0.24329
27.3087	0.0897	72.3785	0.14541	117.251	0.18144	162.318	0.14506
27.3512	0.10129	72.421	0.15177	117.293	0.12983	162.359	0.23442
27.3947	0.01512	72.462	0.1404	117.335	-0.3389	162.399	0.18258
27.4359	0.04206	72.5045	0.13608	117.376	-3.41754	162.446	0.15768
27.4769	-0.00421	72.5461	0.10414	117.417	-13.8444	162.489	0.19952
27.5179	0.00466	72.5881	0.12619	117.461	-23.7774	162.529	0.19008
27.5639	0.04661	72.6302	-0.02262	117.505	-10.3776	162.571	0.16814
27.606	0.12108	72.6731	-3.27157	117.547	-2.47155	162.613	0.21339
27.6462	0.10925	72.7141	-11.6573	117.59	-0.51398	162.658	0.16155
27.6872	0.21589	72.7563	-21.898	117.631	-0.21498	162.701	-0.83935
27.7283	0.32549	72.8003	-2.89765	117.674	0.03467	162.742	-7.38521
27.7751	0.16087	72.8438	-0.56116	117.717	-0.05878	162.782	-25.3788
27.8183	0.09743	72.886	-2.32421	117.758	-0.33197	162.824	-39.0438
27.8613	0.11596	72.9285	-0.34015	117.8	0.1927	162.868	-11.2063
27.9023	0.17542	72.9717	0.12233	117.841	0.28649	162.911	-1.24737
27.945	0.18883	73.0118	0.06401	117.885	0.21225	162.953	-1.37948
27.9861	1.16813	73.0528	0.10834	117.927	0.2359	162.993	-0.61596
28.0292	11.0459	73.0937	0.03627	117.97	0.2035	163.034	-0.17701
28.0692	1.93347	73.1356	0.13881	118.012	0.14404	163.078	0.01501
28.1113	0.7575	73.1798	0.11335	118.054	0.13733	163.122	0.14472
28.1523	0.10971	73.2224	0.11346	118.101	0.23385	163.162	0.16712
28.1983	0.04775	73.2654	0.07867	118.145	0.18497	163.202	0.16246
28.2405	0.02251	73.3065	0.09868	118.187	0.24045	163.243	0.20191
28.2815	0.03263	73.3486	0.17121	118.228	0.28263	163.289	0.13881
28.3236	0.10255	73.3901	0.06173	118.27	0.18258	163.332	0.0615
28.3639	0.18485	73.4335	0.12687	118.314	1.14471	163.372	0.05184
28.4085	0.13074	73.4758	0.14631	118.357	36.6562	163.413	0.12562
28.4523	0.10596	73.519	0.15416	118.4	10.2826	163.455	0.0573
28.4959	0.17235	73.559	0.15325	118.441	2.47815	163.502	0.22817
28.5369	0.02694	73.601	0.1528	118.483	0.6944	163.545	0.30332
28.5789	-0.0191	73.6461	10.681	118.525	0.23829	163.585	0.16996
28.6202	-0.04286	73.6889	25.6263	118.568	0.22135	163.627	0.26
28.6628	0.00387	73.7298	7.59405	118.609	0.1437	163.667	0.15041
28.7062	0.06173	73.7711	2.18256	118.651	0.14211	163.712	60.4065
28.7486	0.17553	73.8131	0.4959	118.694	0.0789	163.757	18.4189
28.7899	0.10914	73.8571	0.216	118.736	0.13017	163.798	6.88362
28.8319	0.14222	73.8991	0.14063	118.779	0.14541	163.839	1.47827
28.8751	0.10823	73.94	0.16064	118.822	0.13472	163.881	0.49931
28.9169	0.01171	73.9818	0.11926	118.862	0.13097	163.924	0.23488
28.9606	0.00921	74.0238	0.1055	118.903	0.32389	163.967	0.26114
29.0019	-0.00807	74.0677	0.00773	118.948	0.2243	164.008	0.19179
29.0431	-0.20316	74.1097	0.09686	118.996	0.16746	164.049	0.13949
29.0868	-0.765	74.1503	0.13245	119.036	0.08492	164.091	0.18736
29.1286	-7.37714	74.1928	0.15609	119.078	0.07572	164.135	0.17042
29.1701	-9.84141	74.2416	0.13813	119.12	0.31389	164.179	0.09845
29.2104	-3.20119	74.2859	0.16246	119.165	0.30661	164.221	0.12642
29.2546	-1.03114	74.3285	0.07105	119.208	0.34322	164.262	0.21998
29.2986	0.04616	74.3698	0.12767	119.249	0.18167	164.303	0.17894
29.3409	-0.02103	74.4108	0.13245	119.289	0.22419	164.345	0.19531
29.3829	-0.03388	74.4547	0.16701	119.33	-0.3414	164.389	0.19452
29.4249	0.05662	74.4962	0.17747	119.376	-3.44266	164.43	0.18019
29.4669	0.07412	74.5384	0.19099	119.42	-14.7434	164.47	0.15132
29.5089	0.14643	74.5799	0.16269	119.461	-22.0898	164.51	0.19941
29.551	0.11539	74.6224	0.06173	119.502	-11.5559	164.557	0.27273
29.5916	0.18395	74.6659	-1.89596	119.543	-2.90981	164.601	0.22828
29.6328	0.10164	74.7079	-7.50151	119.588	-0.86595	164.641	0.196
29.6775	0.0523	74.7485	-23.9681	119.63	-0.17474	164.682	0.14575
29.7201	0.08777	74.7908	-7.75719	119.672	0.06503	164.723	-4.24131
29.7611	0.1354	74.8335	-2.40527	119.713	0.04923	164.769	-15.4904
29.8031	0.13597	74.8755	-0.11096	119.755	0.12801	164.812	-43.2382
29.844	0.29888	74.9195	0.00659	119.798	0.11869	164.854	-16.6962
29.8921	0.28172	74.9619	0.26239	119.843	0.27376	164.895	-5.98448
29.9384	0.09788	75.004	0.02376	119.885	0.20577	164.937	-1.66654
29.9808	0.10687	75.0463	-0.01933	119.927	0.22249	164.982	-0.55263
30.0219	18.8862	75.0888	0.03797	119.969	0.22419	165.024	-0.12983
30.0639	1.70712	75.1299	0.09015	120.011	0.10573	165.067	0.02149
30.1059	0.89142	75.1729	0.12972	120.054	0.08606	165.108	0.01683
30.1505	0.33879	75.2148	0.16132	120.096	0.12312	165.15	0.10709
30.1924	0.1869	75.2562	0.20611	120.138	0.13858	165.192	0.3148
30.2339	0.13972	75.2985	0.13574	120.181	0.14575	165.237	0.1844
30.2746	0.09663	75.3435	0.07196	120.221	0.06366	165.28	0.12028
30.3187	0.03195	75.3855	0.09175	120.263	0.22112	165.321	0.10698
30.3615	0.03774	75.4285	0.05991	120.306	0.02524	165.362	0.12312
30.4031	-0.0191	75.4714	0.13108	120.346	28.7316	165.404	0.12642
30.4442	0.04809	75.5139	0.1852	120.387	22.4638	165.447	0.12483
30.4862	0.19065	75.5543	0.14506	120.431	6.84201	165.488	0.18781
30.5302	0.16132	75.596	0.16746	120.476	0.73624	165.53	0.15086
30.5722	0.1902	75.638	10.7381	120.518	0.56752	165.572	0.02149
30.6125	0.1462	75.68	26.5772	120.561	0.15655	165.615	0.108
30.6531	0.12881	75.722	8.03743	120.601	0.27762	165.657	0.24443
30.6964	-0.03615	75.7645	1.97326	120.643	0.29161	165.698	31.2525
30.7404	-0.04422	75.8066	0.50386	120.688	0.1512	165.74	38.8517
30.7844	0.02365	75.8491	0.23419	120.729	0.27501	165.782	10.8695
30.8264	0.06958	75.8908	0.07833	120.769	0.22533	165.827	2.40846
30.8684	0.02819	75.9326	0.12233	120.812	-0.23022	165.87	0.62857
30.9103	0.14973	75.9755	0.1952	120.854	-0.48294	165.911	0.29604
30.9526	0.13688	76.0175	0.14893	120.899	-0.22169	165.953	0.21885
30.9966	0.07901	76.0595	0.09288	120.941	0.04479	165.995	0.17906
31.0373	-0.0199	76.1004	0.06571	120.982	0.07208	166.037	0.13881
31.0793	-0.56332	76.1428	0.06037	121.024	0.04343	166.081	0.23772
31.1213	-0.35743	76.1879	0.07014	121.067	0.13483	166.122	0.17155
31.1647	-8.53458	76.2307	0.08481	121.11	-0.11346	166.164	0.1404
31.2075	-5.70299	76.2724	0.16371	121.153	0.01978	166.205	0.216
31.2483	-3.64275	76.3155	0.19213	121.195	0.19202	166.253	0.19816
31.2904	0.02467	76.3555	0.17394	121.237	-0.11232	166.3	0.19645
31.3306	0.10743	76.3975	0.14256	121.28	-0.79365	166.342	0.12221
31.3756	0.11482	76.4395	0.2201	121.322	-0.03331	166.383	0.21976
31.4188	-0.00273	76.4805	0.13961	121.365	-1.72406	166.425	0.19349
31.4608	-0.02899	76.5218	0.13324	121.409	-7.91908	166.467	0.16519
31.5028	-0.02353	76.5659	0.05753	121.449	-24.2991	166.51	0.16053
31.5444	0.03092	76.6099	0.15564	121.49	-13.0121	166.551	0.15734
31.5869	0.0839	76.6525	-0.41666	121.532	-5.75835	166.592	0.22067
31.6308	0.1711	76.6928	-4.1731	121.573	-1.13914	166.634	0.15973
31.6728	0.18542	76.7351	-15.9378	121.615	-0.06867	166.678	0.20066
31.7148	0.23113	76.7772	-18.638	121.658	0.08299	166.722	-2.98667
31.7568	0.21726	76.8215	-2.7843	121.701	0.14074	166.764	-12.7232
31.7979	0.25568	76.8621	-0.57821	121.745	0.10778	166.806	-40.6727
31.841	0.14973	76.9044	-0.56741	121.787	0.34288	166.847	-23.1646
31.8829	0.14177	76.9465	0.04138	121.828	0.07947	166.889	-6.08486
31.9249	0.15996	76.9939	0.04775	121.87	-0.34674	166.933	-1.6671
31.9669	0.13017	77.0403	-0.11357	121.913	0.10982	166.976	-0.59777
32.0093	20.8229	77.0823	0.0108	121.955	0.21896	167.017	-0.25886
32.0523	1.89198	77.1247	0.03888	121.997	-0.4635	167.057	0.04559
32.0949	1.34924	77.1655	0.0507	122.038	-0.57901	167.102	-0.06389
32.1374	0.32242	77.208	0.06298	122.08	0.01694	167.145	0.1537
32.1785	0.02785	77.2518	0.17883	122.123	0.18315	167.187	-0.00512
32.2198	0.01035	77.2916	0.18588	122.167	0.11767	167.229	0.08822
32.2644	0.04877	77.3349	0.17553	122.209	0.25545	167.272	0.03422
32.3082	0.09845	77.3769	0.17155	122.251	0.2417	167.314	-0.0623
32.3499	0.19088	77.4207	0.19475	122.295	0.2384	167.357	0.18474
32.3914	0.04104	77.4627	0.08288	122.336	9.01741	167.399	0.23886
32.438	0.03547	77.5058	0.07992	122.378	36.5076	167.44	0.05161
32.4821	0.01273	77.5484	0.12551	122.42	8.92089	167.482	0.10959
32.5238	-0.01296	77.5892	0.14177	122.462	2.26407	167.523	0.02444
32.565	0.00864	77.6303	3.79873	122.503	0.7069	167.566	0.05639
32.6081	0.06753	77.6748	28.3973	122.546	0.4751	167.609	0.26387
32.6491	0.15416	77.7161	9.01684	122.591	-0.02751	167.65	0.14961
32.6949	0.08458	77.7575	2.61912	122.632	0.14836	167.691	29.4396
32.7374	0.08663	77.7998	0.64495	122.674	0.12619	167.737	43.7248
32.7789	0.02717	77.8419	0.17599	122.714	0.27205	167.784	15.6446
32.8199	-0.14347	77.8861	0.06833	122.756	0.17428	167.826	2.53908
32.862	-0.03081	77.9281	0.09288	122.801	0.28524	167.867	1.33093
32.9059	0.02444	77.9702	0.14529	122.841	0.24477	167.909	0.22726
32.9461	0.01648	78.0122	0.16905	122.881	0.33299	167.952	0.17747
32.9884	0.03661	78.0542	0.13495	122.922	-0.05832	167.997	0.19531
33.0298	0.00784	78.0966	0.15507	122.969	-0.25841	168.039	0.18542
33.0741	-0.18235	78.1388	0.12949	123.013	-0.4203	168.08	0.18963
33.1168	-0.14347	78.1808	0.08288	123.054	-0.55695	168.121	0.1545
33.1594	-8.04448	78.2228	0.05525	123.096	-0.40802	168.164	0.23283
33.2	-7.71252	78.2661	0.1387	123.138	-0.08095	168.208	0.12551
33.2428	-3.28691	78.3081	0.13165	123.181	0.04809	168.25	0.1844
33.286	-0.42348	78.3483	0.16325	123.224	0.20077	168.29	0.1379
33.3283	0.00887	78.3914	0.16837	123.266	0.14848	168.333	0.20214
33.3693	0.09709	78.4318	0.22078	123.307	0.21294	168.38	0.12028
33.4115	0.19486	78.4751	0.18747	123.351	-0.88676	168.425	0.1462
33.4522	0.09618	78.5198	0.16189	123.392	-4.37569	168.466	0.18463
33.4983	0.0606	78.5624	0.08754	123.436	-17.2357	168.507	0.16894
33.5403	-0.04127	78.6044	0.11403	123.477	-24.0462	168.549	0.19088
33.5812	0.00534	78.6451	-0.16371	123.517	-9.49103	168.595	0.15052
33.6234	0.00557	78.6878	-3.68868	123.559	-2.04363	168.637	0.06787
33.6635	0.103	78.7299	-13.3924	123.603	-0.90779	168.68	0.18929
33.7105	0.20373	78.772	-19.8817	123.646	0.15916	168.722	-3.32682
33.7528	0.27944	78.8128	-2.87253	123.688	0.16655	168.764	-12.5066
33.7938	0.30695	78.8548	-0.75158	123.729	0.02296	168.805	-39.894
33.8347	0.30025	78.897	-0.1902	123.77	-0.02319	168.849	-24.7965
33.8771	0.15984	78.9419	-0.12403	123.814	-0.07947	168.891	-7.50754
33.9218	0.08254	78.9842	-0.08481	123.859	0.19384	168.933	-0.41655
33.964	0.10118	79.0252	0.05844	123.901	0.28024	168.975	-1.12288
34.0059	19.1149	79.0672	0.09618	123.942	0.26853	169.015	0.22123
34.0461	2.75065	79.1094	0.11619	123.985	0.2965	169.058	0.12369
34.0883	1.28421	79.1539	0.1761	124.026	0.22169	169.1	0.11494
34.1324	0.28899	79.1956	0.06537	124.069	0.11335	169.143	0.13415
34.1765	0.37164	79.2379	0.16803	124.112	0.11676	169.185	0.12903
34.2185	0.13529	79.2788	0.11664	124.152	0.08652	169.226	0.02399
34.2611	-0.01	79.3218	0.08129	124.194	0.1337	169.27	-0.05696
34.3041	0.000227374	79.3638	0.05116	124.237	0.1902	169.312	0.11948
34.3463	-0.0158	79.406	0.04582	124.281	0.28263	169.356	0.01307
34.3883	0.04945	79.4484	0.09504	124.322	5.06282	169.398	0.11266
34.4303	0.13904	79.4905	0.15018	124.364	37.2795	169.441	0.09948
34.471	0.14768	79.5325	0.18076	124.406	8.28732	169.482	0.00341
34.5121	0.14529	79.5757	0.11687	124.453	1.6114	169.523	0.06116
34.5559	0.14813	79.6186	0.1819	124.498	0.4577	169.565	0.0806
34.5994	0.01774	79.6601	24.0199	124.54	0.25511	169.607	-0.12335
34.641	0.01091	79.7011	13.9066	124.582	0.2866	169.648	0.10618
34.683	-0.00182	79.7431	4.77132	124.623	0.21487	169.692	15.3877
34.7242	-0.03286	79.7871	1.15324	124.667	0.07503	169.734	52.011
34.7655	0.00671	79.8284	0.18076	124.71	0.11607	169.775	21.926
34.8096	0.05411	79.8715	0.10493	124.752	0.11028	169.817	3.41618
34.8516	0.16848	79.9128	0.08504	124.793	0.13449	169.86	1.00204
34.8938	0.16087	79.9612	0.09379	124.835	0.19315	169.904	0.30241
34.9357	0.14381	80.0053	0.08288	124.877	0.19986	169.947	0.17258
34.9777	0.10834	80.0477	0.07628	124.919	0.33253	169.988	0.09004
35.0208	-0.1512	80.0899	0.13972	124.961	0.28319	170.028	0.14643
35.0645	-0.36857	80.1325	0.1744	125.004	0.30889	170.072	0.15461
35.105	-0.57446	80.1729	0.16939	125.046	0.24556	170.116	0.23783
35.1479	-8.77162	80.2173	0.13199	125.087	0.25955	170.158	0.25489
35.1892	-7.4391	80.2583	0.12074	125.131	0.13017	170.199	0.25057
35.2333	-4.54122	80.2993	0.10448	125.172	0.07708	170.241	0.21214
35.2741	-0.31218	80.3405	0.093	125.213	0.12096	170.283	0.19065
35.3173	0.12267	80.384	0.06617	125.254	0.31423	170.327	0.23044
35.3583	0.0997	80.4281	0.10982	125.303	0.30934	170.368	0.15007
35.3984	0.08356	80.4711	0.16655	125.348	-0.17224	170.409	0.20577
35.4425	-0.00512	80.5125	0.14529	125.391	-2.96575	170.451	0.16507
35.4858	0.00796	80.5545	0.1387	125.431	-10.3885	170.495	0.19213
35.5269	-0.00625	80.5968	0.13574	125.473	-22.9333	170.539	0.21225
35.5695	0.07594	80.6411	-0.18133	125.518	-10.005	170.58	0.2093
35.6115	0.15996	80.6835	-3.47882	125.56	-4.58624	170.621	0.24193
35.6558	0.22771	80.7258	-12.3365	125.6	-0.95861	170.662	0.16371
35.6977	0.24784	80.7678	-20.4855	125.642	0.10186	170.707	-1.06093
35.7405	0.25352	80.8101	-3.22166	125.682	0.03172	170.748	-8.32392
35.7815	0.17985	80.8527	-0.64824	125.728	0.00716	170.79	-26.6565
35.8235	0.11096	80.8945	-0.91541	125.772	0.04206	170.833	-39.8827
35.8659	0.12244	80.9363	0.05821	125.816	0.17633	170.874	-13.402
35.9069	0.08254	80.9784	0.00716	125.857	0.18792	170.918	-3.37684
35.9473	0.1279	81.0199	-0.196	125.899	0.23488	170.96	-1.44837
35.9898	0.37471	81.0629	0.01967	125.94	0.20543	171.002	-0.71691
36.0347	14.1185	81.1053	0.06935	125.984	0.26148	171.044	0.22612
36.0767	1.61003	81.146	0.10743	126.027	0.13779	171.085	0.20532
36.1187	0.92723	81.1874	0.12676	126.07	0.07628	171.128	0.08026
36.1597	0.21191	81.2301	0.16678	126.112	0.04263	171.172	-0.65165
36.2009	0.02694	81.2721	0.14063	126.153	-0.01921	171.214	-0.29354
36.2458	0.19725	81.3156	0.11039	126.201	0.32981	171.256	0.04911
36.2903	0.07685	81.3576	0.07435	126.242	0.29274	171.298	0.2135
36.3313	0.04957	81.4002	0.05332	126.284	0.22385	171.34	0.38028
36.3724	0.12926	81.4424	0.01489	126.327	2.6165	171.383	0.13461
36.4149	0.18281	81.4859	0.10346	126.368	38.3724	171.424	0.07458
36.4582	0.147	81.5268	0.10755	126.413	8.75525	171.466	0.12574
36.5014	0.01717	81.5696	0.14381	126.454	2.33513	171.508	0.1844
36.5423	-0.05173	81.61	0.16212	126.497	0.51637	171.551	0.18838
36.5837	0.05593	81.6515	4.40423	126.539	0.3738	171.594	0.18133
36.626	-0.03513	81.6959	27.0869	126.581	0.21498	171.635	0.17099
36.6679	0.00705	81.7379	7.88032	126.623	0.22169	171.677	0.32173
36.7119	0.12881	81.7802	2.29704	126.666	0.12096	171.72	62.8261
36.7546	0.07833	81.8222	0.59356	126.707	0.12983	171.761	25.4466
36.7961	0.16087	81.8639	0.14347	126.75	0.10562	171.806	6.00403
36.8381	0.07822	81.9082	0.12017	126.792	0.13006	171.848	1.28625
36.8801	0.05139	81.9511	0.14234	126.833	0.1545	171.888	0.52171
36.9231	0.00568	81.9921	0.15416	126.875	0.13767	171.93	0.25943
36.9654	0.02353	82.0327	0.08777	126.917	0.30207	171.973	0.12597
37.0089	-0.000227374	82.0747	0.06992	126.959	0.34129	172.017	0.22931
37.051	-0.13688	82.118	0.09152	127.002	0.36391	172.059	0.34129
37.093	-0.55252	82.1604	0.03433	127.045	0.19566	172.1	0.30377
37.135	-2.35104	82.2025	0.05605	127.087	0.11278	172.142	0.16519
37.1761	-9.33017	82.2445	0.09175	127.129	0.14927	172.185	0.147
37.2181	-4.79156	82.2866	0.14722	127.172	0.17099	172.227	0.08652
37.2615	-1.75044	82.3316	0.18269	127.213	0.10834	172.27	0.16166
37.3027	-0.16848	82.3733	0.14745	127.257	0.31173	172.312	0.18986
37.3459	-0.0673	82.4159	0.10755	127.299	0.29092	172.355	0.2575
37.3873	-0.02365	82.4575	0.08708	127.341	-0.01739	172.397	0.21794
37.4293	0.01501	82.4985	0.07083	127.383	-3.88138	172.44	0.18952
37.4719	0.09891	82.5425	0.16666	127.429	-14.8531	172.482	0.19384
37.5148	0.13711	82.5851	0.11619	127.473	-23.379	172.523	0.20282
37.559	0.13858	82.6264	0.12574	127.514	-8.999	172.565	0.16223
37.599	0.10755	82.6686	-2.12572	127.556	-3.45892	172.607	0.12039
37.641	0.08595	82.7111	-8.21194	127.597	-0.9843	172.652	0.16371
37.6842	0.06901	82.7541	-24.4226	127.642	-0.16792	172.695	-0.02115
37.7326	0.23795	82.7963	-5.09715	127.686	-0.01717	172.737	-4.85193
37.7762	0.30298	82.8393	-1.82467	127.727	0.04275	172.778	-17.5016
37.8187	0.29172	82.8804	-0.35493	127.769	0.03695	172.818	-46.0648
37.8607	0.21851	82.9228	-0.11141	127.811	0.77148	172.862	-11.9078
37.9027	0.07901	82.9648	0.0822	127.859	0.10414	172.904	-4.64559
37.9458	0.10482	83.0058	-0.06048	127.905	0.13188	172.945	-1.24294
37.9885	1.15585	83.0478	0.16587	127.946	0.24181	172.988	-1.01386
38.0299	12.4094	83.0905	0.16792	127.987	0.22044	173.03	-0.00534
38.071	1.54785	83.1316	0.16178	128.029	0.03729	173.072	-0.29456
38.1127	0.85197	83.1746	0.0565	128.071	0.04661	173.114	0.32173
38.1561	0.25898	83.2166	0.07674	128.116	0.16792	173.155	0.22703
38.2004	0.12972	83.2586	0.08436	128.157	0.28967	173.197	0.09584
38.2418	0.14563	83.3001	0.08879	128.199	0.30786	173.246	-0.0465
38.2844	-0.02194	83.3424	0.06764	128.241	0.2409	173.291	0.15837
38.3261	0.01762	83.3881	0.15348	128.284	-0.02228	173.332	0.14711
38.3678	0.06082	83.4305	0.157	128.332	0.64949	173.374	0.18008
38.4104	0.06378	83.4748	0.10755	128.374	40.0942	173.415	0.04491
38.4527	0.1138	83.5178	0.0897	128.416	13.3855	173.458	0.1171
38.4937	0.07594	83.5593	0.07822	128.459	3.14992	173.502	0.20259
38.5369	-0.04866	83.6022	0.11107	128.5	1.01193	173.545	0.10346
38.5859	0	83.6458	6.08566	128.545	0.23203	173.586	-0.09641
38.6285	0.06355	83.6934	27.3321	128.587	0.12756	173.628	-0.0739
38.6645	-0.00227	83.7395	8.03652	128.628	0.02126	173.67	0.11141
38.7067	-0.00193	83.7815	1.92119	128.67	-0.01899	173.713	12.3728
38.7488	0.12108	83.8225	0.65677	128.711	0.23158	173.756	52.3248
38.7963	0.08924	83.8648	0.18895	128.754	0.08833	173.796	10.2279
38.8419	0.07913	83.9077	0.14529	128.797	0.2799	173.837	3.50212
38.8839	-0.01023	83.9507	0.14347	128.839	0.2857	173.881	0.77887
38.9267	-0.04979	83.9918	0.18315	128.881	0.20884	173.924	0.39256
38.9691	0.04195	84.0338	0.12801	128.923	0.22635	173.965	-0.01035
39.0111	0.06651	84.0763	0.0897	128.967	0.21009	174.008	0.07378
39.0545	-0.00284	84.1243	0.11835	129.008	0.14643	174.05	0.05093
39.0959	-0.24988	84.1688	0.1686	129.05	0.16382	174.092	-0.14904
39.1379	-2.98439	84.211	0.18531	129.092	0.21737	174.136	0.10641
39.1799	-11.1352	84.253	0.07401	129.135	0.21635	174.177	0.00534
39.2222	-2.88776	84.2961	0.10141	129.177	0.30286	174.219	-0.42019
39.2651	-2.04295	84.3418	0.11107	129.219	0.24784	174.261	0.37062
39.3062	-0.12153	84.3858	0.14882	129.262	0.21328	174.303	0.00728
39.3491	-0.05571	84.428	0.18099	129.304	0.10198	174.346	0.22283
39.39	0.04923	84.4704	0.1362	129.347	-0.68599	174.388	0.28751
39.4323	0.06594	84.5127	0.16189	129.39	-4.41764	174.431	-0.0025
39.476	0.12597	84.5558	0.18633	129.432	-17.9917	174.473	-0.70952
39.5184	0.11778	84.5981	0.0955	129.475	-22.3422	174.513	0.16598
39.5594	0.13677	84.641	-0.06742	129.516	-7.60792	174.558	-0.18611
39.6016	0.07731	84.6819	-3.02543	129.559	-1.46758	174.599	0.32014
39.6445	0.02626	84.7244	-11.0443	129.601	-0.64779	174.64	0.13858
39.687	0.06958	84.7655	-22.0933	129.643	-0.08492	174.681	0.50409
39.7298	0.12733	84.8085	-3.07386	129.686	-0.14052	174.726	-3.06488
39.7718	0.2708	84.8506	-1.14017	129.728	0.11005	174.774	-14.4358
39.8138	0.27808	84.8936	-1.13107	129.77	0.07958	174.816	-42.8669
39.8571	0.24579	84.9346	0.02615	129.811	0.05571	174.857	-17.0456
39.8997	0.19475	84.9771	0.11437	129.852	0.18588	174.9	-6.41683
39.9418	0.14836	85.0197	0.03433	129.893	0.23829	174.944	-0.55331
39.9829	0.14506	85.0617	0.05957	129.936	0.30207	174.987	-1.05615
40.0242	14.8724	85.1056	0.09925	129.979	0.3165	175.028	0.6753
40.067	4.70243	85.1479	0.15461	130.024	0.10175	175.069	0.6454
40.1103	1.09594	85.1898	0.11619	130.067	0.11028	175.112	0.4394
40.1524	0.21714	85.2321	0.05912	130.11	0.16519	175.154	0.16382
40.1944	0.12426	85.2763	0.06617	130.152	0.1138	175.198	0.59617
40.2353	0.19088	85.3249	0.02353	130.193	0.0822	175.24	0.26489
40.2784	0.17008	85.37	0.16416	130.235	0.23772	175.281	0.43894
40.3215	0.0706	85.4117	0.12483	130.278	0.20714	175.322	-0.04115
40.3623	0.02967	85.4547	0.07537	130.32	0.26341	175.365	-0.08731
40.4043	-0.04991	85.4969	0.08686	130.362	40.0348	175.41	0.31059
40.4465	-0.02933	85.5396	0.0872	130.405	15.6863	175.451	-0.03433
40.4886	0.03115	85.5806	0.08401	130.447	4.06646	175.493	0.00352
40.5339	0.04866	85.6211	0.11983	130.489	0.8439	175.536	0.28967
40.576	0.14563	85.6626	21.7873	130.532	0.21112	175.577	0.3372
40.617	0.12346	85.7046	15.124	130.573	0.10607	175.621	0.22555
40.6591	0.09493	85.7497	4.83919	130.615	0.19418	175.663	0.37539
40.7011	0.08015	85.7921	1.00295	130.656	0.30002	175.707	26.1256
40.7505	-0.00637	85.8336	0.32321	130.699	0.34527	175.748	43.6745
40.7924	0.0731	85.8756	0.10857	130.741	0.19759	175.79	14.1209
40.8347	0.12608	85.9167	0.04229	130.783	0.30468	175.832	3.8774
40.8768	0.14461	85.9605	0.05298	130.825	0.08185	175.874	1.60526
40.9188	0.12267			130.867	0.12801	175.917	0.79706
40.9668	-0.01739			130.909	0.17121	175.959	0.88107
				130.951	0.12494
				130.994	0.29183

## Sheet: Fig. 4k
x-axis-Time (s)	y-axis-Output Voltage (V)	x-axis-Time (s)	y-axis-Output Voltage (V)	x-axis-Time (s)	y-axis-Output Voltage (V)
60% RH		80% RH		95% RH
0.02523	-4.66522	45.0073	13.0351	90.0057	11.1655
0.05022	-4.36615	45.0333	12.3309	90.0327	10.2841
0.07644	-3.80851	45.0593	12.6596	90.0577	10.8363
0.10144	-4.01227	45.0858	12.6729	90.0837	11.1615
0.12773	-4.42868	45.1118	11.3458	90.1098	10.2771
0.15374	-3.68024	45.1376	10.1205	90.1358	10.203
0.17974	-3.55935	45.1636	7.83748	90.1608	10.9527
0.20575	-4.18249	45.1897	-3.88038	90.1868	10.6892
0.23175	-3.78355	45.2393	-4.51245	90.2118	9.83301
0.25699	-3.18629	45.2653	-4.42868	90.2378	10.3424
0.28202	-3.58677	45.2905	-4.73095	90.2638	10.8047
0.30762	-3.84321	45.3165	-4.9035	90.2885	10.0089
0.33474	-3.04713	45.342	-4.39278	90.3145	9.71404
0.36075	-3.16189	45.368	-4.33283	90.3394	10.4418
0.38651	-3.77905	45.3933	-4.76777	90.3654	10.4988
0.41178	-3.2721	45.4193	-4.50684	90.3905	9.61403
0.43778	3.24189	45.444	-4.05678	90.4164	9.75334
0.46304	-3.34216	45.47	-4.22769	90.4419	10.5063
0.48903	-3.48564	45.4945	-4.56346	90.4672	9.95456
0.51432	4.55574	45.5203	-4.0416	90.4927	9.16952
0.53946	11.7685	45.546	-3.75067	90.5187	9.42258
0.607	10.9388	45.571	-4.17852	90.5434	8.88948
0.63358	11.0836	45.5973	-4.15965	90.5693	5.97253
0.65909	10.4808	45.6232	-3.51939	90.5945	-3.681
0.68414	9.17682	45.6491	-3.7579	90.6445	-4.00232
0.70974	8.87186	45.6751	-4.1033	90.6705	-4.61005
0.73584	9.16837	45.7001	-3.62605	90.6955	-4.36357
0.7606	8.33667	45.7264	-3.29483	90.7215	-3.57994
0.78648	7.46476	45.7528	-3.85487	90.7465	-3.5503
0.81165	7.82625	45.7784	-3.59743	90.7721	-3.89833
0.83766	7.85305	45.8044	-3.04045	90.7981	-3.16782
0.86283	6.86123	45.8294	-3.29109	90.8234	3.46237
0.88884	6.66453	45.8554	-3.6382	90.8494	-3.05119
0.9151	7.3022	45.8803	-3.1144	90.8754	3.13147
0.94115	6.59566	45.9063	3.14869	90.9004	3.9658
0.96715	5.993	45.9323	-3.35108	90.9266	3.81943
0.99323	6.69547	45.9583	-3.1935	90.9526	3.40526
1.01839	6.54626	45.984	3.37179	90.9779	3.9781
1.04439	5.65994	46.01	3.05694	91.0038	4.39264
1.06948	5.81152	46.0354	-3.24417	91.0287	3.78726
1.09595	6.4186	46.0612	3.54833	91.0553	3.86725
1.12134	5.69388	46.0862	14.3023	91.0814	4.60456
1.14809	5.2992	46.1543	14.6383	91.106	4.37318
1.17278	5.96628	46.1803	15.6206	91.1323	4.03155
1.19878	5.91756	46.2073	15.6873	91.1583	4.45183
1.22373	5.07126	46.2323	14.8874	91.1834	4.76865
1.24975	5.26845	46.2583	15.0134	91.2094	4.23688
1.27464	5.91659	46.2837	15.4603	91.2353	4.24394
1.30044	5.34751	46.3098	14.8265	91.2604	4.85253
1.32573	4.41913	46.3363	14.375	91.2864	4.71843
1.37473	5.00885	46.3613	14.9038	91.3114	4.37415
1.40074	4.59325	46.3879	14.835	91.3374	4.61453
1.42595	4.31782	46.4128	14.0612	91.3634	5.00606
1.45154	4.488	46.439	14.2422	91.3884	4.50743
1.47689	4.90404	46.465	14.6772	91.4144	4.51155
1.5026	4.19395	46.4913	13.9336	91.4394	5.01796
1.52958	4.06088	46.5173	13.8166	91.4649	14.224
1.55474	4.42592	46.5432	14.4138	91.5329	14.1701
1.58075	3.11144	46.5682	14.0862	91.5585	14.9715
1.60676	-4.82837	46.5939	13.4175	91.5849	14.6543
1.63257	-8.0621	46.6199	13.8532	91.6099	13.3664
1.70002	-8.50985	46.6461	14.0484	91.6359	13.3584
1.72674	-8.52111	46.6725	13.2291	91.6624	13.6499
1.7518	-7.53901	46.6993	13.4508	91.6874	12.589
1.77803	-6.91193	46.7243	13.949	91.7132	12.1061
1.80303	-7.23948	46.7503	13.3654	91.7395	12.7504
1.82812	-6.79057	46.7763	12.9892	91.7653	12.3367
1.85413	-5.78987	46.8017	13.6243	91.7913	11.3804
1.88013	-5.92658	46.8277	13.4924	91.8174	11.8448
1.90614	-6.17499	46.8528	12.7727	91.8435	12.0961
1.93114	-5.33036	46.8798	13.1041	91.8685	11.1161
1.95715	-4.48439	46.9046	13.507	91.8955	11.0805
2.00534	-4.9017	46.9316	12.7235	91.9202	11.7933
2.03108	-4.31831	46.9571	12.721	91.9463	11.1494
2.05608	-4.05245	46.9832	13.3409	91.9723	10.5535
2.08185	-4.41585	47.0093	12.9231	91.9983	11.2255
2.10724	-4.48487	47.0354	12.3776	92.0233	11.3047
2.1334	-3.72986	47.0604	12.8351	92.0494	10.3584
2.15942	-3.81691	47.0864	12.6308	92.0746	10.5163
2.18543	-4.35912	47.1127	11.374	92.1005	11.2296
2.21044	-3.76228	47.1387	10.5222	92.1265	10.4962
2.23644	-3.3894	47.1643	8.27984	92.1525	10.0782
2.26195	-3.96364	47.1913	-3.58134	92.1784	10.9071
2.28796	-3.9385	47.2393	-4.33139	92.205	10.7525
2.31394	-3.17607	47.2646	-4.35894	92.23	9.8813
2.33866	-3.34908	47.2906	-4.64715	92.256	10.2383
2.36494	-3.92283	47.3156	-4.90494	92.281	10.8506
2.39095	-3.34009	47.342	-4.36324	92.3072	10.1511
2.4163	3.08383	47.3668	-4.30015	92.3321	9.77296
2.44167	-3.56276	47.393	-4.74476	92.359	10.5899
2.46766	-3.55252	47.4179	-4.50636	92.384	10.4574
2.49274	3.74488	47.4442	-4.03767	92.41	9.58847
2.51951	11.5156	47.4702	-4.28788	92.435	9.89771
2.58776	11.2644	47.4952	-4.5312	92.4606	10.5414
2.61376	11.5197	47.5205	-3.99887	92.4866	9.75244
2.63945	10.5206	47.5465	-3.78009	92.5118	8.8311
2.66446	9.40059	47.5719	-4.28591	92.5378	8.80998
2.69025	9.61341	47.5977	-4.04775	92.564	6.69199
2.71625	9.48056	47.6235	-3.49058	92.5894	-4.07269
2.74131	8.38746	47.6493	-3.76939	92.6375	-4.05241
2.76732	8.10933	47.6753	-4.07305	92.6629	-4.0136
2.79335	8.61834	47.7009	-3.45426	92.689	-4.42177
2.81872	8.15621	47.7273	-3.33613	92.7147	-4.15567
2.84373	7.26417	47.7529	-3.82392	92.7397	-3.27545
2.86973	7.68751	47.7789	-3.59624	92.7649	-3.28721
2.89546	7.89422	47.8038	-3.02158	92.7909	-3.63251
2.92146	6.97764	47.8298	-3.29919	92.8161	3.10229
2.94713	6.80939	47.8548	-3.62227	92.8421	3.66163
2.97314	7.45221	47.8808	-3.08288	92.8681	3.18792
2.99874	7.11591	47.9058	3.14387	92.8931	3.21434
3.02374	6.27894	47.9322	-3.36899	92.9194	4.07284
3.04974	6.60872	47.9572	-3.22951	92.9443	4.02367
3.07475	7.11766	47.9832	3.37624	92.9696	3.53363
3.09974	6.48412	48.0092	3.10434	92.9956	3.93437
3.12593	5.98027	48.0352	-3.19086	93.0216	4.50239
3.15074	6.61591	48.0605	14.1054	93.0466	4.0237
3.17575	6.74454	48.1283	15.0818	93.0717	3.8832
3.20186	5.90566	48.1533	14.8895	93.0977	4.51592
3.22686	5.85845	48.1794	15.4738	93.1236	4.61675
3.2531	6.55941	48.2053	15.654	93.1486	4.09844
3.27809	6.28037	48.231	14.8303	93.1747	4.17663
3.3032	5.51172	48.2573	14.7755	93.1997	4.85877
3.32968	6.10039	48.2833	15.3177	93.2264	4.43818
3.35571	6.41397	48.3093	14.8015	93.2515	4.29475
3.3812	5.50804	48.3347	14.2417	93.2767	4.66116
3.40751	5.57155	48.3607	14.8395	93.3022	4.87497
3.43351	6.3465	48.3877	14.5957	93.3287	4.42444
3.45888	5.73204	48.4137	13.9106	93.3547	4.48882
3.4852	5.32689	48.4407	14.448	93.3808	5.07142
3.51121	6.07448	48.4657	14.4919	93.4067	4.57224
3.53821	5.36226	48.492	13.7182	93.4319	4.54392
3.56423	3.23177	48.518	13.8148	93.4579	5.04775
3.61316	-4.3047	48.544	14.3494	93.4827	14.7052
3.63906	-8.5535	48.5697	13.6814	93.5505	14.1899
3.70696	-8.38672	48.5967	13.4377	93.5765	14.7774
3.7324	-7.22651	48.6218	14.0477	93.6032	14.4984
3.75841	-7.22256	48.6482	13.7186	93.6282	13.1552
3.78414	-7.34674	48.6744	13.1367	93.6544	13.173
3.81014	-6.41827	48.7005	13.72	93.6804	13.5109
3.83474	-5.72878	48.7265	13.7042	93.7055	12.5832
3.86114	-6.11157	48.7521	12.9453	93.7325	11.9945
3.88574	-5.93936	48.7781	13.1956	93.7585	12.6699
3.91175	-4.43263	48.8041	13.6543	93.7845	12.2671
3.95999	-4.68399	48.8298	12.9882	93.8095	11.3184
3.98582	-4.69235	48.8572	12.8801	93.8352	11.781
4.01181	-4.04033	48.8829	13.4839	93.8622	12.0491
4.03665	-3.97371	48.909	13.0428	93.8872	10.9989
4.06266	-4.55822	48.934	12.5165	93.9142	11.0807
4.08903	-3.95309	48.9601	13.0613	93.9398	11.767
4.11472	-3.58126	48.9861	13.1917	93.9658	11.0531
4.14075	-4.06465	49.0121	12.4511	93.9918	10.53
4.16574	-4.10531	49.0373	12.5368	94.0161	11.2019
4.19075	-3.32495	49.0633	13.0463	94.0423	11.2397
4.21674	-3.30757	49.0893	12.2914	94.0684	10.285
4.2431	-3.95567	49.1153	11.2324	94.0936	10.5412
4.26848	-3.42539	49.1403	10.5824	94.1197	11.2076
4.29474	3.05167	49.1668	7.85104	94.1458	10.5633
4.31974	-3.59807	49.1917	-3.78365	94.1702	10.0069
4.34574	-3.65412	49.24	-4.25832	94.1961	10.6662
4.37131	3.13401	49.2653	-4.4353	94.2218	10.9092
4.39732	3.03631	49.2916	-4.86717	94.2468	10.0406
4.42277	-3.58522	49.3173	-4.8386	94.2728	10.051
4.44878	-3.10523	49.3423	-4.39932	94.2988	10.8021
4.47351	3.45164	49.3673	-4.38928	94.3239	10.3616
4.49974	3.63664	49.3933	-4.82582	94.3499	9.65716
4.52474	10.7972	49.4183	-4.43448	94.3751	10.2657
4.59292	11.7191	49.4443	-4.08009	94.4011	10.6421
4.61856	10.7623	49.4693	-4.35294	94.4256	9.86626
4.64504	9.8291	49.4956	-4.53479	94.4515	9.6509
4.66975	10.0552	49.5206	-3.95678	94.4777	10.4246
4.69524	9.67	49.5456	-3.80842	94.5035	10.0392
4.72061	8.48303	49.5716	-4.29985	94.5285	8.80401
4.74675	8.32548	49.5976	-4.0463	94.5545	8.32416
4.77188	8.76429	49.6236	-3.51142	94.5815	6.37456
4.79702	8.13704	49.6486	-3.82885	94.6075	-4.19942
4.82303	7.2859	49.6752	-4.08687	94.6557	-4.10328
4.84886	7.64636	49.7003	-3.54579	94.6818	-4.00032
4.87386	7.95226	49.7253	-3.3135	94.7072	-4.37827
4.89976	7.09786	49.7511	-3.81047	94.7332	-4.0595
4.92474	6.81323	49.7773	-3.63831	94.7584	-3.21482
4.9504	7.47617	49.8033	-3.03429	94.7842	-3.32789
4.97641	7.1984	49.8283	-3.29043	94.8104	-3.58504
5.00212	6.3831	49.854	-3.64163	94.8354	3.20603
5.02713	6.63175	49.8799	-3.15427	94.8606	3.68414
5.05275	7.19934	49.9049	3.13919	94.8876	3.149
5.07776	6.59628	49.9309	-3.34812	94.9129	3.28803
5.1033	5.99494	49.956	-3.27647	94.9389	4.16516
5.1294	6.6289	49.982	3.32947	94.9642	3.83199
5.15441	6.75703	50.0079	3.18469	94.9903	3.55237
5.18041	5.91749	50.0327	-3.2406	95.0159	4.20413
5.20541	5.94594	50.0593	4.73434	95.0419	4.37583
5.23141	6.62066	50.0843	15.1034	95.0674	3.84444
5.25642	6.25667	50.1522	14.9304	95.094	4.09767
5.28343	5.53099	50.1776	15.2479	95.1205	4.68404
5.30851	6.16024	50.2028	15.7442	95.1462	4.14579
5.33474	6.3989	50.2288	15.0991	95.1711	4.10897
5.35945	5.58051	50.2544	14.6722	95.1972	4.68185
5.38601	5.59351	50.2807	15.2129	95.2222	4.72928
5.41184	6.31792	50.3057	15.058	95.2482	4.27132
5.43685	5.92677	50.3317	14.2731	95.2732	4.33526
5.46225	5.24183	50.3573	14.4839	95.2985	4.97148
5.48764	5.78433	50.3842	14.9084	95.3244	4.56641
5.51342	6.04727	50.4093	14.184	95.3495	4.42375
5.53943	5.08193	50.4353	13.9616	95.3758	4.86727
5.56475	3.52	50.4619	14.5661	95.4022	4.94663
5.61269	-3.84878	50.4869	14.2818	95.4274	4.53721
5.63877	-8.51856	50.5128	13.5863	95.4524	4.55917
5.70577	-8.27836	50.5388	13.9723	95.4779	14.2798
5.73171	-7.24806	50.5648	14.2022	95.5451	14.3516
5.75772	-7.36229	50.5913	13.452	95.5721	14.3586
5.78276	-7.44571	50.6163	13.4864	95.5974	15.0381
5.80931	-6.32808	50.642	14.0632	95.624	13.9482
5.83478	-5.97455	50.668	13.6993	95.6503	13.1374
5.86084	-6.3651	50.693	13.0727	95.6763	13.6261
5.88585	-5.80583	50.719	13.5815	95.7024	13.2555
5.91149	-5.04276	50.745	13.7452	95.7274	12.1592
5.9375	-5.25615	50.771	12.9857	95.7538	12.3563
5.96308	-5.53046	50.7963	13.0509	95.7798	12.7554
5.9874	-4.15186	50.8223	13.6322	95.806	11.7731
6.03609	-4.14537	50.848	13.1835	95.831	11.4732
6.06209	-4.65886	50.874	12.6852	95.8574	12.2016
6.0881	-4.13199	50.9	13.2832	95.8834	11.5579
6.11297	-3.76428	50.926	13.2181	95.9095	10.9302
6.1391	-4.16118	50.9513	12.5113	95.9355	11.7212
6.16442	-4.252	50.9783	12.9156	95.9625	11.5245
6.18942	-3.53438	51.0037	13.2128	95.9875	10.6098
6.21474	-3.50545	51.0297	12.4418	96.0137	10.9867
6.24075	-4.05415	51.0564	12.4555	96.0387	11.5007
6.26603	-3.77202	51.0827	12.8381	96.0648	10.694
6.29202	-3.09022	51.1083	11.9107	96.0908	10.381
6.31875	-3.65477	51.1343	10.4736	96.1159	11.1198
6.34345	-3.74312	51.1593	8.77051	96.1419	11.0082
6.36928	-3.03724	51.1853	5.47719	96.1679	10.0967
6.39513	-3.08894	51.2101	-4.57301	96.1939	10.6304
6.42111	-3.60878	51.2595	-4.42508	96.2199	11.0274
6.44715	-3.2601	51.2855	-4.41626	96.2459	10.048
6.47197	3.3064	51.3104	-4.9095	96.2717	10.1598
6.49831	3.7082	51.3372	-4.48876	96.2983	10.8962
6.5238	11.9096	51.3652	-4.33755	96.3227	10.3836
6.59181	12.4744	51.3901	-4.74248	96.3488	9.73167
6.61763	11.2738	51.4161	-4.59697	96.3748	10.5101
6.64405	10.436	51.4418	-4.0813	96.4008	10.5988
6.66909	10.5312	51.4668	-4.19469	96.4268	9.75155
6.69474	9.99132	51.4938	-4.55298	96.4518	9.85192
6.72023	8.79611	51.5198	-3.97236	96.4775	10.5407
6.74574	8.65833	51.5455	-3.85722	96.5031	9.85346
6.77172	8.9288	51.5721	-4.34455	96.5291	8.72807
6.79675	8.10065	51.5966	-4.04666	96.5548	8.40036
6.82276	7.41531	51.6221	-3.50862	96.5804	6.13166
6.84818	7.83129	51.6481	-3.80504	96.6064	-4.26787
6.87318	7.72171	51.6731	-4.07624	96.6548	-4.02898
6.90019	6.74619	51.6993	-3.49576	96.6808	-3.943
6.9262	6.95728	51.725	-3.32336	96.706	-4.35184
6.9522	7.31289	51.7506	-3.80625	96.7324	-3.99839
6.97821	6.4775	51.7763	-3.63934	96.7574	-3.13529
7.00369	6.19888	51.8022	-3.03385	96.7834	-3.30159
7.0287	6.80947	51.8272	-3.24074	96.8094	-3.49551
7.05481	6.59164	51.8529	-3.63423	96.8354	3.47153
7.07946	5.77801	51.8788	-3.15043	96.8614	3.66192
7.10547	5.97905	51.9043	3.19037	96.8864	3.13713
7.13148	6.48517	51.9293	-3.2505	96.9124	3.51247
7.15704	5.73913	51.9545	-3.29211	96.9379	4.22735
7.18396	5.46854	51.9815	3.3711	96.9639	3.804
7.20922	6.11193	52.0073	3.0894	96.9901	3.62992
7.2341	5.98335	52.0333	-3.18271	97.0161	4.50379
7.26011	5.19597	52.0593	4.96219	97.0428	4.17598
7.28612	5.43748	52.0853	14.9407	97.0688	3.9049
7.31112	6.0035	52.1531	14.9438	97.0951	4.42089
7.33674	5.49214	52.1791	15.6808	97.1195	4.66961
7.36121	4.57995	52.2055	15.6054	97.1454	4.12353
7.41021	5.7528	52.23	14.8147	97.1714	4.17156
7.47775	5.05529	52.2563	14.897	97.1964	4.83186
7.50236	4.44319	52.2822	15.3648	97.2224	4.62243
7.55195	4.68107	52.3082	14.7453	97.2479	4.31579
7.57796	3.32499	52.3332	14.2937	97.2731	4.49594
7.60428	-4.19191	52.3595	14.8413	97.2983	5.00054
7.63027	-8.20603	52.3855	14.7365	97.3241	4.55848
7.69674	-8.83278	52.4112	13.9746	97.3493	4.47444
7.72282	-8.79431	52.4372	14.2776	97.3744	4.84095
7.74772	-7.72364	52.4632	14.6002	97.4008	4.98695
7.7738	-7.3897	52.4892	13.7945	97.4258	4.57705
7.79981	-7.59919	52.5153	13.7835	97.4518	4.66556
7.82559	-6.87771	52.5413	14.3651	97.4778	14.5699
7.8516	-6.12355	52.5669	13.899	97.5458	14.2622
7.87671	-6.34183	52.5927	13.3644	97.5722	14.6874
7.90272	-6.30169	52.6182	13.9052	97.5988	14.9815
7.92774	-5.51282	52.6442	13.9584	97.6239	13.7279
7.95375	-5.24916	52.6702	13.145	97.6501	13.2017
7.97962	-5.64627	52.6971	13.4723	97.6761	13.6762
8.00461	-5.23754	52.7222	13.8597	97.7008	13.1334
8.0305	-4.31638	52.7492	13.163	97.7279	12.099
8.07876	-4.73466	52.7737	12.9942	97.753	12.5012
8.10477	-4.49901	52.8008	13.6329	97.7794	12.6875
8.12977	-3.95691	52.8261	13.3475	97.8046	11.6564
8.15478	-4.06362	52.8516	12.6935	97.8306	11.6153
8.18086	-4.46682	52.8777	13.1006	97.8574	12.2669
8.20575	-3.97255	52.9023	13.4301	97.8826	11.5432
8.23175	-3.57191	52.9293	12.6287	97.9085	10.9816
8.25776	-4.04286	52.9556	12.7197	97.9344	11.7628
8.28267	-4.0436	52.9816	13.2945	97.9615	11.3456
8.30868	-3.36795	53.0073	12.8026	97.9885	10.6348
8.33475	-3.42689	53.0333	12.3382	98.0141	11.3262
8.35976	-3.93978	53.0585	12.9481	98.0401	11.3524
8.38578	-3.53383	53.0855	12.5036	98.0662	10.3969
8.41074	-3.03052	53.1116	11.3289	98.0907	10.6107
8.43674	-3.51041	53.1376	10.7168	98.1173	11.2916
8.46275	-3.55386	53.1631	8.27318	98.1432	10.5026
8.48877	3.09641	53.1891	-3.59312	98.1693	10.1829
8.51536	11.4914	53.2383	-4.20517	98.1943	10.932
8.58296	11.7994	53.2638	-4.43923	98.2205	10.75
8.60896	12.2252	53.2898	-4.87162	98.246	9.92562
8.63438	11.2624	53.3146	-4.83824	98.273	10.5177
8.66088	10.0793	53.3406	-4.41055	98.298	10.8758
8.68576	10.1161	53.3663	-4.44078	98.324	10.0864
8.71174	9.92794	53.3923	-4.83768	98.3487	9.83514
8.73676	8.78369	53.4173	-4.30932	98.3747	10.5985
8.76275	8.34262	53.4433	-4.10854	98.3995	10.5667
8.78876	8.72202	53.4683	-4.51818	98.4257	9.63564
8.81426	8.21803	53.4943	-4.38679	98.4514	10.1453
8.83974	7.27621	53.5203	-3.84543	98.4787	10.5345
8.86641	7.68003	53.5463	-4.02872	98.5039	9.53805
8.89231	7.68847	53.5713	-4.38609	98.5299	9.12817
8.91794	6.76213	53.5971	-3.83949	98.5547	9.23154
8.94294	6.63554	53.6233	-3.57549	98.5807	7.14988
8.96874	7.20707	53.6496	-4.05876	98.6057	-3.75514
8.99374	6.78796	53.6746	-3.92366	98.6551	-3.87706
9.01985	6.02005	53.7016	-3.29626	98.6811	-4.05029
9.04485	6.30434	53.7273	-3.62363	98.7069	-4.53667
9.07068	6.73045	53.7524	-3.87412	98.7319	-3.9688
9.09569	6.04483	53.7783	-3.2501	98.7575	-3.27329
9.12136	5.66451	53.8047	-3.2096	98.783	-3.59469
9.14736	6.28648	53.8308	-3.69395	98.8093	-3.51497
9.17287	6.17876	53.8568	-3.22981	98.8343	3.39943
9.19898	5.33542	53.8828	3.13152	98.8603	3.54776
9.22497	5.66412	53.9088	-3.33899	98.8853	3.04477
9.24985	6.12592	53.9338	-3.34672	98.9114	3.42238
9.2759	5.4561	53.9599	3.28222	98.9374	4.1661
9.3019	5.16679	53.9853	3.17703	98.9626	3.68624
9.32792	5.8428	54.0113	-3.2855	98.9886	3.57859
9.35346	5.60305	54.0363	3.1309	99.014	4.28151
9.37901	4.54953	54.0624	13.6728	99.04	4.37892
9.42769	5.02653	54.13	14.4137	99.065	3.86226
9.4535	4.82986	54.1551	15.1652	99.0901	4.00707
9.47961	4.45862	54.1812	15.8656	99.1165	4.70284
9.5045	4.54315	54.2072	15.1574	99.1415	4.37367
9.53008	4.97427	54.2326	14.8854	99.1675	4.12978
9.55609	4.25454	54.2596	15.4443	99.193	4.45177
9.58066	3.722	54.2842	15.1294	99.2181	4.84417
9.6065	3.32888	54.3108	14.3894	99.2431	4.31652
9.63276	-4.30584	54.3368	14.8451	99.2696	4.31969
9.65876	-9.2515	54.3624	14.9306	99.2951	4.88633
9.72574	-8.59147	54.3884	14.1442	99.32	4.82681
9.75177	-7.97231	54.4144	14.2955	99.3458	4.4562
9.77678	-8.20891	54.4404	14.7399	99.3718	4.65112
9.80307	-7.72728	54.4675	13.9569	99.3974	5.07814
9.82853	-6.74259	54.493	13.8488	99.4235	4.5896
9.85452	-6.6398	54.5195	14.4478	99.4481	4.57765
9.87953	-6.82688	54.5455	13.9608	99.4745	5.05383
9.90583	-6.01417	54.5715	13.4705	99.4987	14.7355
9.93083	-5.56739	54.5973	14.0459	99.5664	14.2474
9.95696	-5.93834	54.6233	14.0175	99.5934	14.941
9.98196	-5.73446	54.6483	13.2693	99.6198	14.4465
10.008	-4.5519	54.6744	13.4435	99.6448	13.201
10.057	-4.81369	54.7004	13.9577	99.671	13.3014
10.0816	-4.78585	54.7264	13.3619	99.6971	13.5612
10.1078	-4.20166	54.7516	13.0099	99.7221	12.5974
10.134	-4.20071	54.7776	13.6286	99.7481	12.0567
10.1585	-4.65287	54.8039	13.4775	99.7741	12.7055
10.1845	-4.10498	54.8293	12.7758	99.8001	12.3618
10.211	-3.80271	54.8553	13.082	99.8261	11.3827
10.2367	-4.24481	54.8805	13.5221	99.8511	11.8079
10.2614	-4.23647	54.9065	12.9089	99.8781	12.129
10.2876	-3.57012	54.9323	12.6367	99.9032	11.158
10.3132	-3.60063	54.9583	13.2615	99.9292	11.0856
10.3382	-4.12301	54.9841	13.0086	99.9553	11.8175
10.3646	-3.75069	55.0101	12.3773	99.9816	11.229
10.3896	-3.19904	55.0361	12.7734	100.007	10.5824
10.4147	-3.58437	55.0611	13.1067	100.033	11.2656
10.4406	-3.82949	55.0872	12.1355	100.058	11.3472
10.4658	-3.1846	55.1143	11.8106	100.084	10.3962
10.4927	3.42112	55.1403	11.5909	100.109	10.5566
10.5179	11.5317	55.1657	9.27005	100.135	11.2689
10.5846	12.0479	55.1907	5.49979	100.16	10.6899
10.6106	11.8918	55.2161	-3.74596	100.187	10.0913
10.6369	10.4811	55.2658	-4.55331	100.213	10.7498
10.6619	9.96326	55.2907	-4.95855	100.239	10.874
10.688	10.1532	55.3173	-4.51355	100.264	10.0028
10.7138	9.41102	55.3418	-4.42738	100.289	10.127
10.7381	8.36686	55.3678	-4.81828	100.315	10.9065
10.7639	8.41078	55.3933	-4.68142	100.341	10.3174
10.789	8.62718	55.4192	-4.19246	100.366	9.74185
10.8147	7.78012	55.4443	-4.24729	100.392	10.4378
10.8404	7.20287	55.4693	-4.66291	100.417	10.663
10.8654	7.65863	55.4953	-4.2177	100.443	9.79745
10.8921	7.39975	55.5203	-3.8677	100.469	9.7829
10.9181	6.52297	55.5466	-4.23417	100.495	10.4789
10.9439	6.70611	55.5722	-4.27073	100.52	9.87182
10.9689	7.12185	55.5983	-3.66309	100.546	8.57618
10.9939	6.48445	55.6243	-3.73671	100.571	7.75404
11.0199	5.93676	55.6496	-4.18568	100.596	5.68421
11.0464	6.53287	55.6746	-3.82847	100.623	-4.37303
11.0714	6.42887	55.6999	-3.31257	100.671	-4.17681
11.0971	5.5888	55.7258	-3.80366	100.697	-3.88452
11.123	5.80388	55.7528	-3.80109	100.722	-4.15021
11.1487	6.29013	55.7788	-3.11308	100.747	-4.07331
11.1747	5.54117	55.8048	-3.41697	100.773	-3.12546
11.2008	5.27818	55.8316	-3.67901	100.799	3.00754
11.2258	5.92033	55.8563	-3.0871	100.825	-3.42683
11.2518	5.80533	55.8823	3.02442	100.85	3.19058
11.2768	5.03545	55.9084	-3.46502	100.876	3.86652
11.3025	5.23645	55.9344	-3.22937	100.902	3.41523
11.3285	5.83349	55.9594	3.32835	100.928	3.41055
11.3535	5.28873	55.9844	3.05707	100.955	4.26505
11.3789	4.49253	56.0097	-3.28477	100.981	3.99781
11.4284	5.05464	56.0357	3.25444	101.006	3.66426
11.4543	4.57146	56.061	13.342	101.032	4.2344
11.4802	4.40199	56.129	14.3015	101.057	4.54963
11.5057	4.77035	56.1547	15.3631	101.083	3.97042
11.5307	4.75178	56.181	15.7262	101.108	4.05
11.557	4.01592	56.2081	14.9672	101.134	4.73828
11.5825	3.82146	56.2341	15.0788	101.159	4.5233
11.6087	3.19312	56.2593	15.5186	101.185	4.21121
11.6348	-4.74618	56.2853	14.8449	101.21	4.44486
11.6601	-9.31561	56.3105	14.4535	101.236	4.92904
11.7274	-8.58056	56.3375	15.0897	101.261	4.42364
11.7528	-8.37627	56.3637	14.657	101.287	4.39329
11.7774	-8.59194	56.3897	14.0674	101.313	4.91701
11.8034	-7.79837	56.4159	14.586	101.339	4.89677
11.829	-7.05254	56.4419	14.6242	101.363	4.51992
11.8547	-7.3843	56.4673	13.8457	101.39	4.71263
11.8818	-6.99514	56.4927	13.9719	101.417	5.06952
11.9072	-6.12663	56.5193	14.4668	101.442	4.62181
11.9332	-6.3068	56.5453	13.7635	101.468	4.64455
11.9592	-6.40804	56.5713	13.5644	101.494	14.5402
11.9852	-5.64058	56.5973	14.1672	101.562	14.4923
12.0108	-5.34668	56.6233	13.909	101.587	14.4265
12.0362	-5.76866	56.6493	13.2207	101.613	15.0142
12.0612	-5.5453	56.6743	13.6541	101.638	14.4038
12.0872	-4.496	56.7	13.9082	101.664	13.1929
12.1356	-4.81994	56.7265	13.0943	101.691	13.3422
12.1606	-4.74933	56.7527	13.2244	101.715	13.5577
12.1867	-4.2068	56.7783	13.7665	101.741	12.5029
12.2132	-4.25482	56.8045	13.1455	101.767	12.1496
12.2382	-4.68606	56.8307	12.832	101.793	12.8105
12.2633	-4.1998	56.8558	13.4538	101.819	12.2683
12.2887	-3.86828	56.8818	13.3184	101.845	11.4564
12.3147	-4.27772	56.9078	12.6176	101.871	12.1088
12.3408	-4.32382	56.9338	12.9654	101.898	12.0183
12.3667	-3.6734	56.9598	13.3456	101.923	11.0604
12.3921	-3.71178	56.9858	12.6489	101.949	11.2967
12.4171	-4.22987	57.0112	12.5251	101.975	11.8818
12.4428	-3.85115	57.0372	13.1757	102.001	11.0405
12.4688	-3.36442	57.0633	12.7637	102.026	10.7072
12.4947	-3.4568	57.0893	12.019	102.052	11.4451
12.5207	11.6282	57.1157	12.1601	102.078	11.2867
12.5883	12.3003	57.1427	10.9282	102.103	10.3947
12.6148	11.1999	57.1681	7.94158	102.128	10.6947
12.6403	10.5044	57.1941	3.27539	102.154	11.3276
12.6657	10.6947	57.2423	-4.07967	102.18	10.6224
12.6918	10.0674	57.2683	-4.95215	102.206	10.2429
12.7168	8.94019	57.2943	-4.62526	102.232	10.9998
12.7417	8.85201	57.3188	-4.46706	102.258	10.8369
12.7677	9.12247	57.3448	-4.80135	102.283	9.97495
12.7938	8.32368	57.3717	-4.72849	102.309	10.4133
12.8184	7.61739	57.3977	-4.25146	102.335	10.9597
12.8447	8.00595	57.4235	-4.40429	102.36	10.284
12.8697	7.93282	57.4495	-4.69244	102.385	9.84553
12.8957	7.0141	57.4748	-4.15489	102.411	10.7242
12.9219	6.96777	57.4997	-3.92744	102.437	10.5234
12.9469	7.44614	57.5262	-4.39056	102.464	9.68368
12.9729	6.72221	57.5512	-4.29928	102.489	10.1445
12.9991	6.14804	57.5778	-3.66156	102.515	10.3458
13.0241	6.6584	57.6035	-4.00889	102.541	8.97224
13.0503	6.56003	57.6296	-4.1906	102.567	7.85517
13.0763	5.70113	57.6556	-3.5107	102.593	6.17829
13.1015	5.87624	57.6813	-3.50221	102.618	-3.88612
13.1279	6.39849	57.7073	-4.00021	102.667	-4.55276
13.1534	5.79841	57.7327	-3.61561	102.691	-3.90127
13.1794	5.35625	57.7593	-3.15264	102.717	-3.68761
13.205	5.99179	57.7848	-3.61198	102.743	-4.17012
13.2306	5.79081	57.8105	-3.59706	102.768	-3.59125
13.2567	5.06352	57.836	3.02065	102.795	3.20709
13.2822	5.37191	57.863	-3.15546	102.821	-3.19016
13.3082	5.88748	57.888	-3.52312	102.846	-3.07521
13.3331	5.16251	57.9143	3.07799	102.872	3.81594
13.3599	4.58863	57.9402	3.22701	102.898	3.75203
13.4084	5.07484	57.9662	-3.28869	102.924	3.31491
13.4328	4.56956	57.9923	-3.08622	102.949	3.85887
13.4588	4.43097	58.0181	3.50265	102.976	4.36504
13.4845	4.86181	58.044	3.18146	103	3.8698
13.5102	4.79956	58.0693	13.669	103.027	3.79464
13.5357	4.21018	58.1368	15.433	103.053	4.53076
13.5618	4.07209	58.1626	15.4806	103.078	4.45838
13.5871	4.16969	58.1886	15.082	103.104	4.0365
13.6131	-3.89917	58.2146	15.6426	103.129	4.21158
13.6399	-9.08218	58.2406	15.5143	103.154	4.83277
13.7066	-8.78673	58.266	14.7005	103.179	4.44751
13.7326	-9.02868	58.2916	14.8372	103.205	4.26247
13.7586	-8.83326	58.3178	15.2843	103.23	4.62305
13.7846	-7.8736	58.3436	14.6144	103.256	4.91679
13.8107	-7.5505	58.3699	14.2688	103.281	4.42042
13.836	-7.77484	58.3952	14.898	103.307	4.44698
13.8622	-7.18731	58.4222	14.5358	103.332	4.99921
13.8871	-6.40429	58.4479	13.8926	103.358	4.84044
13.914	-6.66022	58.4749	14.4536	103.383	4.55406
13.9392	-6.60887	58.5004	14.4501	103.409	4.68696
13.9652	-5.6694	58.5254	13.695	103.435	6.36804
13.992	-5.85858	58.5517	13.8326	103.502	10.4705
14.019	-5.98665	58.5777	14.3347	103.528	14.2513
14.044	-5.22967	58.6036	13.729	103.555	15.2987
14.07	-5.06553	58.6293	13.3885	103.581	14.4304
14.095	-5.49532	58.6552	13.9921	103.607	14.2288
14.121	-5.21973	58.6812	13.7239	103.633	14.5867
14.1463	-4.31578	58.7073	13.0934	103.658	13.6997
14.1948	-4.7183	58.7334	13.5724	103.684	12.7566
14.2208	-4.56547	58.7593	13.7211	103.71	13.2477
14.2465	-4.04085	58.7853	12.9483	103.736	13.1124
14.272	-4.17447	58.8117	13.1392	103.762	12.0526
14.2976	-4.55998	58.8378	13.6506	103.787	12.1101
14.3226	-4.08094	58.8638	12.9555	103.814	12.6374
14.3478	-3.72079	58.8899	12.8054	103.84	11.7949
14.3744	-4.23985	58.9158	13.435	103.865	11.3302
14.3999	-4.15379	58.9413	13.072	103.89	12.0351
14.4259	-3.49364	58.9673	12.4893	103.916	11.8351
14.4517	-3.76178	58.9933	13.0191	103.943	10.8816
14.4778	-4.12105	59.0193	13.1987	103.969	11.4118
14.5029	-3.47141	59.0453	12.4481	103.995	11.6576
14.5289	11.867	59.0709	12.4731	104.021	10.7153
14.5959	11.4697	59.0956	12.9404	104.047	10.8172
14.6222	11.6525	59.122	12.1591	104.073	11.5166
14.6488	11.487	59.1482	10.9525	104.099	10.7838
14.6738	10.1142	59.1742	9.931	104.125	10.3943
14.7007	9.72739	59.1992	6.8634	104.15	11.0998
14.7258	9.94264	59.2252	-4.27577	104.177	11.06
14.7511	9.20802	59.2741	-4.3787	104.202	10.1638
14.777	8.23139	59.2991	-4.48177	104.227	10.395
14.8027	8.45666	59.3251	-4.94718	104.253	11.1062
14.8275	8.54077	59.3503	-4.78772	104.279	10.3427
14.8533	7.62822	59.3774	-4.38049	104.304	9.98569
14.8791	7.26048	59.4021	-4.5462	104.33	10.7741
14.9041	7.79199	59.4283	-4.78052	104.356	10.6383
14.9301	7.49563	59.4537	-4.21241	104.383	9.80736
14.9551	6.61722	59.4797	-4.06379	104.408	10.1989
14.9811	6.89887	59.5041	-4.49238	104.434	10.7736
15.0071	7.24	59.5304	-4.38362	104.46	10.0032
15.0328	6.50322	59.556	-3.79692	104.484	9.67564
15.059	6.16519	59.582	-4.00815	104.51	10.2738
15.0841	6.75573	59.6076	-4.3187	104.536	9.78877
15.1091	6.61951	59.6326	-3.84017	104.562	8.1125
15.1357	5.83452	59.6586	-3.47465	104.588	6.41043
15.1608	6.0984	59.6846	-4.01446	104.613	-3.22803
15.1865	6.59386	59.7096	-3.86806	104.662	-4.54997
15.2118	6.03943	59.7356	-3.22784	104.687	-4.30884
15.2379	5.52115	59.7616	-3.51845	104.713	-3.66144
15.2629	6.07617	59.788	-3.78386	104.739	-3.95777
15.2889	6.23832	59.813	-3.20151	104.765	-3.90167
15.314	5.45267	59.8388	-3.03552	104.791	3.0598
15.3392	5.45177	59.8643	-3.53148	104.817	3.16971
15.3652	6.12075	59.8903	-3.34909	104.842	-3.25548
15.3906	5.83134	59.9163	3.24301	104.868	3.34123
15.4157	5.13011	59.9423	-3.00712	104.894	3.99544
15.4421	5.56217	59.9673	-3.34246	104.918	3.57213
15.4669	5.98498	59.9933	3.20576	104.944	3.43388
15.4923	5.32654	60.0183	3.41223	104.97	4.18813
15.5186	5.00441	60.0443	-3.09219	104.995	4.28676
15.5431	5.41515	60.0703	4.41248	105.021	3.76316
15.5693	3.6193	60.0953	15.2318	105.047	4.03051
15.6184	-4.3876	60.163	15.1549	105.072	4.66082
15.6437	-8.42196	60.189	15.1703	105.098	4.13408
15.7111	-8.76184	60.215	15.7794	105.125	4.07545
15.7358	-9.02758	60.2401	15.4331	105.15	4.64338
15.761	-8.18332	60.2661	14.696	105.175	4.7304
15.7871	-7.3817	60.2921	15.0566	105.201	4.25889
15.812	-7.59308	60.3183	15.209	105.226	4.3448
15.8382	-7.49195	60.3443	14.3648	105.253	4.97247
15.8647	-6.60341	60.3703	14.4977	105.277	4.57681
15.8897	-6.51645	60.3961	14.981	105.303	4.43688
15.9158	-6.77186	60.4221	14.262	105.328	4.73412
15.9408	-6.16939	60.4491	14.0287	105.354	5.00244
15.9667	-5.54988	60.4736	14.5995	105.379	4.54999
15.9927	-5.97087	60.4996	14.3533	105.405	4.57739
16.0194	-5.73734	60.5266	13.6393	105.43	5.06685
16.0457	-4.62769	60.5526	14.1255	105.456	4.92995
16.0942	-5.00692	60.5776	14.2727	105.481	13.4836
16.1205	-4.71095	60.6041	13.4978	105.549	15.033
16.1458	-4.32311	60.6291	13.5534	105.574	15.2146
16.1718	-4.4436	60.6551	14.1299	105.6	14.1554
16.1968	-4.72963	60.6819	13.5338	105.626	13.9516
16.2229	-4.10508	60.7075	13.1806	105.652	14.2842
16.2489	-3.97897	60.7336	13.772	105.678	13.1709
16.2747	-4.48271	60.7589	13.699	105.704	12.5987
16.2997	-4.30597	60.7842	12.9562	105.73	13.1876
16.3247	-3.71875	60.8103	13.231	105.756	12.7772
16.3508	-3.83904	60.8369	13.6658	105.782	11.7713
16.3762	-4.30177	60.8626	12.9804	105.808	12.4118
16.4016	-3.83533	60.8886	12.8127	105.835	12.3256
16.427	-3.43088	60.9146	13.4536	105.86	11.3206
16.453	-3.90458	60.9395	13.1545	105.887	11.5599
16.478	-3.97082	60.9655	12.5165	105.912	12.0752
16.5043	3.64295	60.9912	12.9968	105.939	11.1508
16.5309	11.8523	61.0182	13.2065	105.965	10.9849
16.5988	11.7416	61.0437	12.4848	105.99	11.7376
16.6248	12.0424	61.0697	12.5295	106.016	11.2982
16.6501	11.245	61.0955	12.9501	106.042	10.5305
16.6757	10.063	61.1225	11.784	106.068	11.1057
16.7006	10.0042	61.1483	10.8941	106.093	11.3752
16.7256	10.1171	61.1743	9.5798	106.119	10.4196
16.7508	9.24637	61.2003	5.96462	106.145	10.6437
16.7766	8.46533	61.2253	-4.34324	106.172	11.2759
16.8026	8.76643	61.2743	-4.3552	106.198	10.5933
16.8277	8.71687	61.2997	-4.48618	106.223	10.11
16.8531	7.76678	61.3246	-4.97909	106.249	10.8171
16.8784	7.56816	61.3516	-4.5138	106.274	10.9383
16.9039	8.11489	61.3773	-4.31483	106.299	10.0419
16.9304	7.56312	61.4034	-4.75974	106.325	10.2045
16.9562	6.83638	61.4294	-4.52841	106.351	10.9286
16.9812	7.18774	61.4547	-4.03514	106.377	10.2359
17.0067	7.46369	61.4807	-4.2659	106.404	9.81553
17.0328	6.60412	61.5072	-4.50276	106.429	10.6746
17.0589	6.42365	61.5322	-3.85574	106.455	10.5098
17.0839	7.00312	61.5593	-3.81056	106.48	9.65957
17.1088	6.86379	61.5843	-4.29451	106.506	9.84955
17.1348	6.02525	61.6095	-3.98203	106.531	10.1503
17.1597	6.1592	61.6356	-3.45027	106.557	8.85491
17.1857	6.74479	61.6619	-3.906	106.582	6.6024
17.2118	6.12051	61.6883	-3.95632	106.608	3.17952
17.2368	5.69778	61.7133	-3.32806	106.657	-4.06475
17.2627	6.31868	61.7393	-3.45188	106.682	-4.57619
17.2887	6.30346	61.766	-3.84064	106.709	-3.73525
17.3145	5.47888	61.791	-3.3396	106.736	-3.63375
17.3405	5.73356	61.8165	-3.02211	106.761	-4.05594
17.3657	6.27934	61.8427	-3.51993	106.787	-3.42496
17.3914	5.6341	61.8687	-3.43544	106.812	3.35786
17.4175	5.27512	61.8937	3.20157	106.838	3.05975
17.4425	5.93057	61.9203	-3.08376	106.863	-3.0856
17.4683	5.95065	61.9463	-3.35157	106.889	3.74185
17.4935	5.16719	61.9725	3.26514	106.914	3.95478
17.5187	5.22345	61.9983	3.30932	106.94	3.4028
17.5447	5.6329	62.0233	-3.1759	106.965	3.74771
17.5704	3.40191	62.0493	3.05203	106.991	4.43164
17.6187	-4.32592	62.0753	5.05336	107.017	4.05214
17.6447	-8.33286	62.1003	14.5192	107.042	3.8333
17.7108	-8.87501	62.1683	15.2213	107.068	4.42022
17.7368	-8.93583	62.1953	15.9508	107.093	4.57667
17.7628	-7.96529	62.2203	15.3735	107.119	4.08076
17.7879	-7.53313	62.2463	14.9796	107.145	4.16202
17.8139	-7.7646	62.2731	15.5644	107.17	4.82678
17.8386	-7.36351	62.2993	15.1595	107.195	4.5014
17.8646	-6.42612	62.325	14.5197	107.221	4.31136
17.8902	-6.45328	62.3512	14.9741	107.248	4.74715
17.9162	-6.66435	62.3773	15.0565	107.273	4.90296
17.9412	-5.97656	62.4033	14.2958	107.299	4.45207
17.9674	-5.47104	62.4286	14.3523	107.324	4.48063
17.9926	-5.82914	62.4546	14.8799	107.35	5.06897
18.0187	-5.71554	62.4796	14.3701	107.375	4.83019
18.0432	-4.56628	62.5066	13.8657	107.401	4.58817
18.0925	-4.85649	62.5316	14.403	107.426	4.71894
18.1185	-4.77593	62.5573	14.4613	107.452	6.83508
18.1443	-4.24443	62.5833	13.6823	107.519	11.143
18.1703	-4.25241	62.6083	13.8042	107.545	14.3689
18.1947	-4.69763	62.6352	14.3189	107.571	15.4114
18.2212	-4.23755	62.6612	13.6477	107.598	14.5156
18.2458	-3.87313	62.6872	13.5055	107.624	14.2564
18.2718	-4.26005	62.7132	14.1294	107.65	14.5966
18.2973	-4.32127	62.7403	13.5991	107.675	13.6759
18.3228	-3.69234	62.7663	13.1511	107.701	12.7886
18.3482	-3.66721	62.7913	13.7142	107.727	13.3024
18.3747	-4.20715	62.8178	13.6498	107.753	13.0928
18.3999	-3.83022	62.8438	12.9416	107.779	12.0266
18.4255	-3.31162	62.8705	13.3599	107.805	12.1739
18.4508	-3.69299	62.8964	13.6832	107.83	12.6797
18.4768	-3.92743	62.9211	12.9689	107.857	11.7937
18.5021	3.07539	62.9478	12.998	107.883	11.4005
18.5289	12.0871	62.9738	13.5644	107.909	12.1525
18.5962	11.6337	63.0008	13.0228	107.934	11.7779
18.6219	11.9448	63.0254	12.6168	107.96	10.9125
18.649	11.3256	63.0514	13.2357	107.986	11.4294
18.6737	10.0528	63.0773	13.1386	108.012	11.749
18.6998	9.90425	63.1033	12.1909	108.038	10.7251
18.7258	10.032	63.1293	11.9692	108.064	10.8663
18.7508	9.17714	63.1543	11.4759	108.09	11.5495
18.7758	8.36531	63.1814	8.56739	108.116	10.9092
18.8026	8.80993	63.2064	3.17379	108.141	10.3489
18.8279	8.53274	63.2573	-3.95738	108.166	11.0391
18.8529	7.58968	63.2821	-4.84657	108.192	11.1841
18.8787	7.5821	63.3091	-4.65399	108.218	10.2918
18.9047	8.02649	63.3351	-4.39803	108.244	10.2903
18.931	7.31612	63.3604	-4.5701	108.269	11.0522
18.9561	6.77328	63.3862	-4.75013	108.295	10.5891
18.9814	7.2885	63.4122	-4.14958	108.32	9.94288
19.0075	7.26665	63.4383	-4.17614	108.346	10.5151
19.0332	6.36616	63.4643	-4.61598	108.371	10.9299
19.0592	6.60702	63.4903	-4.13766	108.397	10.1587
19.0856	7.02266	63.5153	-3.79949	108.422	9.88391
19.1106	6.34779	63.5403	-4.19371	108.448	10.6753
19.1366	5.91838	63.5663	-4.17904	108.474	10.5475
19.162	6.57151	63.5933	-3.55493	108.498	9.60923
19.188	6.47897	63.6183	-3.70928	108.525	9.59975
19.214	5.66755	63.6443	-4.08664	108.55	9.74039
19.2392	5.80157	63.6703	-3.54201	108.576	7.62925
19.2647	6.39288	63.6963	-3.28596	108.601	-3.01313
19.2896	5.92501	63.7223	-3.76015	108.651	-3.57168
19.3158	5.34811	63.7469	-3.66128	108.675	-4.18489
19.3414	5.99315	63.7732	-3.03107	108.701	-4.51578
19.3675	6.02675	63.7982	-3.18779	108.727	-3.58376
19.3929	5.29015	63.8235	-3.59371	108.753	-3.38366
19.418	5.33699	63.8497	-3.10396	108.779	-3.83915
19.4437	5.98909	63.8749	3.24291	108.805	-3.17424
19.4698	5.6213	63.9012	-3.2506	108.831	3.54254
19.4947	4.6097	63.9262	-3.23055	108.857	3.11508
19.544	5.01055	63.9522	3.3815	108.883	3.15791
19.5691	4.39643	63.9782	3.30332	108.908	4.01935
19.5951	3.15351	64.0032	-3.15882	108.933	4.0317
19.6219	-4.26829	64.0293	3.33825	108.959	3.53519
19.6469	-8.63014	64.0553	3.6457	108.985	3.83435
19.7146	-9.28905	64.0813	13.503	109.01	4.5289
19.7397	-8.58908	64.1483	15.2314	109.036	4.13259
19.7647	-7.81344	64.1748	15.9529	109.061	3.93937
19.7907	-8.02656	64.2028	15.2144	109.087	4.53686
19.817	-7.76744	64.2283	15.4202	109.113	4.63829
19.843	-6.76181	64.2543	15.7601	109.139	4.15333
19.869	-6.6357	64.2806	15.0197	109.164	4.25683
19.895	-6.84571	64.306	14.692	109.189	4.88933
19.92	-6.16888	64.3313	15.2469	109.214	4.65161
19.946	-5.57277	64.3563	15.0723	109.239	4.37324
19.972	-5.86003	64.3818	14.3087	109.265	4.5271
19.997	-5.77124	64.4083	14.5374	109.29	5.04259
20.0232	-4.58329	64.4336	14.9578	109.316	4.57066
20.0719	-4.86385	64.4596	14.2812	109.341	4.52768
20.0979	-4.78964	64.4853	13.987	109.367	5.81486
20.1227	-4.226	64.5116	14.6034	109.436	5.14045
20.1487	-4.21327	64.5376	14.2977	109.462	5.19124
20.175	-4.6647	64.5636	13.6729	109.489	5.94382
20.2001	-4.23559	64.5906	14.2403	109.514	8.66048
20.2258	-3.8098	64.6166	14.2358	109.54	12.7444
20.2518	-4.2563	64.6416	13.4901	109.566	14.8318
20.2772	-4.22957	64.6676	13.7537	109.592	15.4138
20.3032	-3.54633	64.6937	14.1483	109.616	14.4242
20.3291	-3.72142	64.7203	13.4417	109.643	14.2197
20.3558	-4.1336	64.7463	13.3479	109.669	14.4953
20.3814	-3.57233	64.7724	13.9486	109.695	13.3149
20.4064	-3.26767	64.7983	13.5333	109.721	12.8208
20.4327	-3.7972	64.8235	12.9785	109.747	13.4067
20.4577	-3.72834	64.85	13.5513	109.773	12.8728
20.4844	-3.02348	64.8752	13.5933	109.799	11.9242
20.5107	-3.27023	64.9012	12.8722	109.825	12.4499
20.5357	11.6091	64.9271	13.0327	109.851	12.5577
20.6028	12.5901	64.9531	13.5638	109.877	11.4471
20.6287	12.0178	64.9786	12.9205	109.903	11.7013
20.6547	10.728	65.0056	12.7471	109.929	12.2234
20.6796	10.5874	65.0326	13.4085	109.955	11.3554
20.7061	10.4516	65.0586	12.8783	109.982	11.0556
20.7318	9.25842	65.0849	12.463	110.008	11.8696
20.7577	8.71389	65.1106	12.8153	110.034	11.1744
20.784	9.06617	65.1369	11.9554	110.061	10.6911
20.8098	8.34173	65.1629	10.101	110.086	11.3964
20.8347	7.46013	65.1899	7.80147	110.112	11.3651
20.8598	7.66534	65.215	-3.45651	110.138	10.4462
20.8853	7.83836	65.2651	-4.62321	110.163	10.7382
20.9117	6.98466	65.2901	-4.34467	110.189	11.3646
20.9367	6.61612	65.3161	-4.35339	110.215	10.5747
20.9619	7.19087	65.3414	-4.84979	110.241	10.2215
20.9884	6.8572	65.3674	-4.58207	110.266	10.9599
21.0144	6.10486	65.3925	-4.16475	110.292	10.9586
21.0392	6.4177	65.4183	-4.34334	110.317	10.0842
21.0662	6.77976	65.4431	-4.62274	110.343	10.4064
21.0923	5.95757	65.4694	-4.07437	110.369	11.004
21.1178	5.84934	65.4944	-3.82806	110.395	10.2934
21.1422	6.47508	65.5204	-4.28767	110.421	9.93348
21.1682	6.21425	65.5454	-4.19753	110.447	10.7495
21.1942	5.4759	65.5714	-3.57628	110.473	10.5751
21.2192	5.80011	65.5964	-3.67039	110.499	9.63633
21.2447	6.2681	65.6222	-4.09918	110.524	9.79959
21.2702	5.60253	65.6482	-3.67836	110.55	9.76926
21.2961	5.28134	65.6737	-3.22407	110.576	7.50824
21.3221	5.89992	65.6997	-3.65134	110.602	3.20375
21.3471	5.90308	65.7246	-3.71548	110.65	-3.53722
21.3731	5.11518	65.7506	-3.01193	110.676	-4.39645
21.3978	5.25866	65.7776	-3.29331	110.702	-4.40835
21.4238	5.89043	65.8036	-3.56226	110.727	-3.5494
21.4494	5.37987	65.8287	-3.03305	110.752	-3.41366
21.4758	4.54323	65.8547	3.18044	110.779	-3.86894
21.5239	5.04656	65.8813	-3.35931	110.804	-3.12805
21.5489	4.49485	65.9073	-3.04771	110.83	3.52204
21.5759	3.91289	65.9333	3.47403	110.856	3.10678
21.6019	3.69756	65.9583	3.11393	110.881	3.13465
21.6279	-3.92885	65.9843	-3.12273	110.906	3.96754
21.6539	-9.40154	66.0093	3.44472	110.932	3.97482
21.7212	-8.86986	66.0351	3.60035	110.958	3.50374
21.7467	-8.36675	66.0605	3.16932	110.983	3.90303
21.7728	-8.61353	66.0857	14.3049	111.009	4.49727
21.7977	-8.17811	66.1545	15.59	111.035	3.99139
21.8238	-7.17325	66.1804	15.306	111.061	3.90572
21.85	-7.16291	66.2054	15.4816	111.087	4.57958
21.875	-7.23611	66.2317	15.9596	111.112	4.59041
21.9001	-6.45217	66.2577	15.1858	111.137	4.1372
21.9261	-5.95301	66.2851	14.9301	111.162	4.25137
21.9519	-6.27412	66.3101	15.5161	111.188	4.89852
21.9767	-6.08952	66.3373	15.0317	111.214	4.41239
22.0019	-5.30832	66.3623	14.415	111.24	4.341
22.0279	-5.28388	66.3873	14.8348	111.265	4.77697
22.0539	-5.62094	66.4147	14.907	111.291	4.90183
22.08	-5.08915	66.4407	14.1117	111.317	4.47993
22.1052	-4.35223	66.4667	14.3995	111.341	4.50543
22.154	-4.79319	66.4925	14.7429	111.367	5.08815
22.1792	-4.40975	66.5185	14.0282	111.393	4.7865
22.2053	-3.9975	66.5436	13.8242	111.418	4.60936
22.2313	-4.3325	66.5705	14.4383	111.444	4.80365
22.2564	-4.4269	66.596	14.0749	111.47	12.5769
22.2824	-3.73241	66.622	13.4677	111.537	14.0726
22.3084	-3.80484	66.6472	13.9131	111.563	14.8538
22.3343	-4.27764	66.6742	14.1219	111.589	15.3557
22.3603	-3.83604	66.6993	13.3755	111.614	14.2888
22.3857	-3.37839	66.7253	13.4727	111.641	13.6393
22.4114	-3.93361	66.7519	13.9807	111.666	14.1394
22.4374	-3.8643	66.7779	13.2602	111.692	13.4224
22.4634	-3.1601	66.8043	13.1167	111.718	12.4544
22.4893	-3.46632	66.83	13.7122	111.743	12.8727
22.5156	3.33359	66.856	13.4524	111.77	12.9623
22.5411	12.5795	66.8822	12.7815	111.796	11.8655
22.6098	11.9967	66.9073	13.2326	111.822	12.0878
22.6358	10.9667	66.9333	13.484	111.849	12.5274
22.6608	10.9475	66.9593	12.7307	111.874	11.6033
22.6858	10.6128	66.9853	12.7664	111.901	11.4391
22.7118	9.2658	67.0113	13.3834	111.928	12.1325
22.738	8.93191	67.0373	12.7371	111.953	11.4433
22.764	9.18921	67.0642	12.5222	111.98	10.896
22.7887	8.43163	67.0902	13.1153	112.006	11.7113
22.8148	7.53882	67.1152	12.7193	112.032	11.4802
22.84	7.77139	67.1412	11.577	112.058	10.6026
22.8658	7.86843	67.1672	11.0748	112.083	10.9747
22.8913	6.96502	67.1932	9.29916	112.109	11.5347
22.9162	6.64936	67.2183	5.33761	112.134	10.7323
22.9423	7.162	67.2443	-3.97084	112.16	10.4283
22.9673	6.89702	67.2938	-4.19984	112.185	11.1668
22.9934	6.06182	67.3189	-4.72483	112.211	10.9288
23.0185	6.25711	67.345	-4.7049	112.237	10.1464
23.0447	6.74845	67.3699	-4.23838	112.263	10.5663
23.0697	6.12007	67.3959	-4.253	112.288	11.1386
23.0959	5.63552	67.4202	-4.68502	112.314	10.3639
23.1209	6.15917	67.4462	-4.17949	112.34	10.0157
23.1465	6.32377	67.4732	-3.86878	112.365	10.7073
23.1715	5.48269	67.4979	-4.23756	112.39	10.8466
23.1976	5.53212	67.5229	-4.29325	112.415	9.98741
23.2236	6.16829	67.5489	-3.64721	112.441	9.97994
23.2492	5.8201	67.5746	-3.66025	112.466	10.7843
23.2742	5.1495	67.6003	-4.12415	112.492	10.4528
23.2999	5.53417	67.6269	-3.64795	112.517	9.59152
23.3249	5.99719	67.6531	-3.2492	112.543	9.83366
23.3497	5.41326	67.6781	-3.68796	112.568	9.84778
23.3758	5.06234	67.7041	-3.64871	112.594	7.83894
23.4018	5.71577	67.7301	-3.02467	112.62	5.22348
23.4272	5.64322	67.7562	-3.17128	112.646	-3.43829
23.4531	4.53696	67.7812	-3.56853	112.695	-4.4885
23.5014	4.84657	67.8076	3.00141	112.72	-4.40694
23.5271	4.9561	67.8342	3.1938	112.747	-3.56608
23.5521	4.3349	67.8592	-3.3164	112.772	-3.54789
23.5781	4.12159	67.8852	-3.02515	112.797	-3.93404
23.6035	4.26928	67.9115	3.4892	112.823	-3.24608
23.6285	-3.41982	67.9373	3.11514	112.848	3.45407
23.6551	-9.17748	67.9633	-3.01859	112.874	3.04159
23.722	-8.90542	67.989	3.60029	112.899	3.05035
23.7472	-8.74504	68.015	3.44855	112.925	3.8907
23.7732	-8.97974	68.0412	3.0513	112.951	3.94653
23.7994	-8.25254	68.067	3.75989	112.977	3.44202
23.8254	-7.46652	68.0921	14.6981	113.002	3.84031
23.8504	-7.52971	68.16	14.9261	113.029	4.4323
23.8758	-7.48882	68.1866	15.701	113.055	3.82185
23.9004	-6.64288	68.212	15.9768	113.081	3.90589
23.9264	-6.22987	68.239	15.1113	113.107	4.64188
23.9514	-6.54892	68.265	15.3691	113.132	4.41784
23.9781	-6.23258	68.292	15.6444	113.156	4.08557
24.0033	-5.42858	68.318	14.8821	113.183	4.34169
24.0287	-5.48311	68.344	14.7349	113.208	4.86259
24.0538	-5.80259	68.3695	15.2798	113.233	4.38918
24.0798	-5.2295	68.3958	14.7879	113.258	4.29611
24.1047	-4.462	68.4218	14.2119	113.284	4.74323
24.1538	-4.88382	68.4473	14.7025	113.309	4.90058
24.1787	-4.51194	68.4723	14.7569	113.335	4.44464
24.2048	-4.10777	68.499	13.9573	113.362	4.54737
24.2303	-4.28925	68.525	14.0737	113.388	5.09257
24.2553	-4.57799	68.55	14.5968	113.412	4.66051
24.2813	-3.9861	68.5761	14.0373	113.438	4.57945
24.3063	-3.79377	68.6016	13.5797	113.466	9.71901
24.3327	-4.32681	68.6274	14.1667	113.533	13.4395
24.3587	-4.0682	68.6534	14.1152	113.558	14.3028
24.3833	-3.47694	68.6793	13.3572	113.585	15.3121
24.4097	-3.72874	68.7051	13.5531	113.61	14.8826
24.4351	-4.08983	68.7301	14.0434	113.637	13.7367
24.4612	-3.50904	68.7569	13.4134	113.663	13.9199
24.4868	-3.26507	68.7825	13.1429	113.689	13.9375
24.5117	-3.64024	68.8083	13.7487	113.714	12.7506
24.5375	11.8493	68.8346	13.5449	113.741	12.5607
24.6059	12.5118	68.8596	12.8534	113.766	13.1494
24.6312	11.4858	68.8856	13.2665	113.792	12.4409
24.6572	10.7567	68.911	13.5696	113.818	11.7
24.6822	10.8976	68.9373	12.7639	113.845	12.4417
24.709	10.0429	68.9643	12.8521	113.87	12.1506
24.7343	8.92486	68.9893	13.4281	113.896	11.2154
24.7598	9.02856	69.0163	12.9001	113.922	11.6395
24.7858	8.98682	69.0413	12.4881	113.948	12.0317
24.8108	7.96997	69.0673	13.1666	113.974	11.113
24.8368	7.52992	69.0934	12.8328	114	10.9345
24.8618	7.98102	69.1194	11.818	114.024	11.6669
24.8877	7.56658	69.1465	11.5815	114.051	11.3176
24.9137	6.69424	69.1716	10.2337	114.077	10.5116
24.9391	6.84807	69.1986	6.27854	114.103	11.0503
24.9647	7.2733	69.2246	-3.43501	114.128	11.4154
24.9907	6.56916	69.2733	-4.11295	114.154	10.4225
25.0152	6.1191	69.2995	-4.85724	114.18	10.5333
25.0412	6.77736	69.3255	-4.44351	114.206	11.2566
25.0677	6.58381	69.3509	-4.16828	114.232	10.7298
25.0928	5.7819	69.3769	-4.5254	114.257	10.0828
25.119	6.11243	69.4014	-4.62414	114.282	10.6831
25.1447	6.50652	69.4281	-3.96697	114.308	11.0035
25.1708	5.84864	69.4541	-4.08649	114.333	10.1526
25.1958	5.47641	69.48	-4.41971	114.359	10.0829
25.2213	6.12689	69.507	-3.83972	114.385	10.8511
25.2473	6.05844	69.532	-3.64366	114.411	10.5822
25.2723	5.30619	69.558	-4.14031	114.436	9.78275
25.2983	5.44164	69.584	-3.89657	114.462	10.173
25.3242	6.0551	69.61	-3.28925	114.486	10.7605
25.3485	5.67214	69.635	-3.55532	114.513	9.74033
25.3747	5.03004	69.6609	-3.84344	114.538	9.15115
25.3998	5.54538	69.6868	-3.25893	114.564	9.16341
25.4251	5.86216	69.7118	-3.05318	114.59	6.64769
25.4511	5.04327	69.7378	-3.54506	114.616	-3.85516
25.4767	5.053	69.7628	-3.37259	114.665	-3.88587
25.5031	5.77482	69.7888	3.23584	114.691	-4.12604
25.5293	5.29941	69.8148	-3.00615	114.717	-4.42213
25.5547	4.00844	69.8406	-3.34041	114.743	-3.56781
25.6028	3.88701	69.8666	3.19678	114.769	-3.23401
25.6279	-3.84757	69.8913	3.40673	114.795	-3.70849
25.6539	-9.42844	69.9183	-3.07969	114.821	-3.16267
25.7218	-8.97202	69.9433	3.1586	114.846	3.63719
25.7463	-8.56138	69.9693	3.69214	114.872	3.29163
25.7727	-8.79175	69.9955	3.40007	114.897	3.14059
25.7981	-8.29432	70.0205	3.07808	114.923	3.95617
25.8231	-7.43842	70.0455	3.60771	114.949	4.10602
25.8485	-7.37428	70.0715	4.6417	114.974	3.56698
25.8747	-7.53515	70.0975	14.3633	115	3.79626
25.9008	-6.70901	70.1653	15.5449	115.027	4.52835
25.9268	-6.25981	70.1911	16.0844	115.051	4.1605
25.9521	-6.58069	70.2171	15.356	115.077	3.92885
25.9767	-6.36536	70.242	15.2082	115.103	4.42101
26.003	-5.58041	70.268	15.7322	115.128	4.66474
26.0276	-5.47341	70.2931	15.372	115.154	4.15502
26.0534	-5.89126	70.3193	14.6326	115.179	4.22172
26.0791	-5.34962	70.3445	14.9855	115.205	4.86737
26.1057	-4.53997	70.3715	15.1358	115.231	4.5975
26.1537	-4.95223	70.3973	14.3141	115.256	4.34956
26.1797	-4.49961	70.4233	14.4122	115.282	4.59868
26.2057	-4.20115	70.4483	14.918	115.308	5.00255
26.2322	-4.55621	70.4753	14.3138	115.333	4.52413
26.2572	-4.57691	70.5008	13.9046	115.358	4.50952
26.2822	-3.95904	70.5268	14.5534	115.384	4.97857
26.3085	-3.99241	70.5537	14.2518	115.409	4.95994
26.3345	-4.45388	70.5787	13.5641	115.435	4.61622
26.3597	-4.0283	70.6043	13.9303	115.461	4.72774
26.3848	-3.57818	70.631	14.2431	115.487	13.7154
26.4105	-3.95229	70.6565	13.5315	115.554	14.2416
26.4355	-4.15304	70.6815	13.4679	115.58	14.9172
26.4614	-3.5099	70.7083	14.0612	115.606	15.215
26.4874	-3.41022	70.7343	13.5217	115.633	13.9894
26.5126	-3.76724	70.7603	13.1685	115.659	13.6639
26.5385	11.9619	70.7873	13.7945	115.686	14.0846
26.6058	12.5861	70.812	13.6168	115.712	13.0343
26.6318	11.5429	70.8383	12.9179	115.737	12.46
26.6578	11.0217	70.8643	13.2835	115.763	13.0603
26.6828	11.1845	70.8893	13.6579	115.788	12.5665
26.7097	10.3271	70.9163	12.9517	115.815	11.7056
26.7348	9.29439	70.9422	12.8436	115.842	12.3079
26.7598	9.42135	70.9673	13.468	115.868	12.3176
26.7857	9.42417	70.9933	13.1283	115.894	11.3053
26.8117	8.31876	71.0193	12.5381	115.92	11.4897
26.8375	8.04016	71.0453	13.0589	115.946	12.1031
26.8625	8.46865	71.0699	13.2445	115.972	11.3228
26.8878	8.03819	71.0962	12.3742	115.998	10.9134
26.914	7.15	71.1223	12.0472	116.023	11.6469
26.9398	7.30053	71.1483	11.9464	116.049	11.4684
26.9647	7.67969	71.1743	9.83028	116.075	10.584
26.991	6.79642	71.2003	6.22614	116.1	10.8754
27.0167	6.55709	71.2263	-3.34684	116.125	11.517
27.0428	7.10827	71.2763	-4.60911	116.152	10.7163
27.0673	6.89001	71.3023	-4.66993	116.177	10.3746
27.0933	6.04284	71.3283	-4.23001	116.203	11.2378
27.1186	6.21054	71.3543	-4.41909	116.229	10.948
27.1446	6.73849	71.3793	-4.7128	116.255	10.1345
27.1696	6.16523	71.4051	-4.0956	116.281	10.5825
27.1956	5.61977	71.4314	-3.96768	116.306	11.1199
27.2207	6.13909	71.4573	-4.45171	116.332	10.3111
27.2467	6.30185	71.4823	-4.25227	116.357	10.0426
27.2713	5.54713	71.5073	-3.66968	116.382	10.7998
27.2976	5.45197	71.5333	-3.80751	116.408	10.7376
27.3223	6.08374	71.5583	-4.19263	116.434	9.88068
27.3483	5.83743	71.5845	-3.6083	116.459	10.1014
27.3746	5.11014	71.6105	-3.3495	116.485	10.8333
27.3996	5.46268	71.6364	-3.82601	116.51	10.1382
27.4255	5.93356	71.6624	-3.65342	116.536	9.3936
27.4509	5.31664	71.6874	-3.0229	116.562	9.628
27.4759	4.65806	71.7144	-3.43938	116.587	8.85067
27.5257	5.09058	71.7399	-3.53462	116.612	5.67783
27.551	4.43249	71.7659	3.10639	116.639	-3.55456
27.577	4.08688	71.7911	3.13213	116.688	-3.90925
27.602	4.08215	71.8171	-3.34797	116.713	-4.51473
27.6273	-3.23317	71.8433	-3.05037	116.739	-4.11373
27.6523	-9.19211	71.8683	3.48532	116.764	-3.34316
27.7195	-9.1158	71.8938	3.11977	116.79	-3.46667
27.7447	-8.49213	71.9198	-3.04041	116.816	-3.67086
27.7707	-8.59593	71.9461	3.58326	116.841	3.25911
27.796	-8.46378	71.9718	3.6489	116.867	3.57924
27.822	-7.52841	71.9968	3.12278	116.893	3.06359
27.847	-7.01898	72.0228	3.479	116.918	3.38174
27.8723	-7.30778	72.0488	3.95245	116.944	4.17903
27.897	-7.08307	72.0738	3.57075	116.97	3.89852
27.923	-6.17272	72.0999	14.0652	116.995	3.58665
27.9489	-6.16685	72.1685	15.8183	117.021	4.16636
27.9749	-6.39189	72.1949	15.6093	117.047	4.49875
28.0013	-5.66729	72.2207	15.6067	117.072	3.94858
28.0263	-5.22012	72.2467	16.1525	117.098	3.98487
28.0523	-5.594	72.2727	15.7231	117.124	4.71806
28.077	-5.45959	72.2987	15.0283	117.15	4.44537
28.103	-4.38184	72.3244	15.5191	117.175	4.17148
28.1519	-4.72533	72.3504	15.4285	117.2	4.49172
28.1784	-4.61344	72.3764	14.6336	117.226	4.88297
28.2034	-4.03893	72.4025	14.838	117.252	4.36899
28.2286	-4.05975	72.4283	15.2392	117.277	4.36301
28.2546	-4.52866	72.457	14.2598	117.303	4.90931
28.2808	-4.02898	72.4824	14.5192	117.328	4.8651
28.3058	-3.64678	72.5084	14.9225	117.354	4.49867
28.3316	-4.08029	72.5345	14.2152	117.379	4.5953
28.357	-4.16204	72.5605	13.9567	117.405	5.74825
28.382	-3.53816	72.5855	14.5372	117.473	5.09555
28.408	-3.48986	72.6106	14.3432	117.498	6.73989
28.4346	-4.00503	72.6851	14.1688	117.523	12.5076
28.4596	-3.6901	72.7113	14.042	117.55	14.6141
28.4846	-3.1044	72.7368	13.3299	117.575	14.4156
28.5108	3.07166	72.7628	13.6	117.601	15.1111
28.5358	11.7848	72.7878	14.0631	117.626	14.9741
28.6038	12.5577	72.8138	13.4439	117.652	13.638
28.6301	11.7073	72.8398	13.1384	117.678	13.4652
28.6558	10.5455	72.8654	13.7491	117.704	13.8854
28.6814	10.6189	72.8913	13.5322	117.729	12.9858
28.7074	10.2241	72.9173	12.846	117.756	12.2973
28.7327	9.0148	72.9425	13.2627	117.782	12.9167
28.7577	8.62823	72.9683	13.5719	117.808	12.6183
28.7838	8.9598	72.9943	12.9197	117.834	11.6109
28.809	8.2639	73.0194	12.7775	117.86	12.1203
28.8358	7.42248	73.0464	13.4482	117.886	12.325
28.8608	7.69107	73.072	13.146	117.912	11.3298
28.8858	7.86979	73.0973	12.4507	117.938	11.3221
28.9118	6.88995	73.1233	12.6581	117.964	12.038
28.9387	6.80114	73.1493	12.3244	117.989	11.4026
28.9634	7.3372	73.1746	10.5157	118.015	10.7817
28.9898	6.87235	73.2006	8.03275	118.041	11.4429
29.0158	6.15858	73.227	5.34296	118.067	11.5088
29.0409	6.66734	73.252	-4.39063	118.092	10.5857
29.0667	6.7946	73.301	-4.58228	118.119	10.7677
29.0922	6.00632	73.3259	-4.17734	118.144	11.4626
29.1182	5.8677	73.3519	-4.33893	118.169	10.8068
29.1425	6.48514	73.3776	-4.73513	118.196	10.2686
29.1685	6.25545	73.4029	-4.23307	118.221	10.9178
29.1942	5.50529	73.4283	-3.93556	118.247	11.1264
29.2202	5.78471	73.4543	-4.32915	118.272	10.2339
29.2454	6.27839	73.4804	-4.2195	118.297	10.2292
29.2712	5.66703	73.5064	-3.61634	118.322	10.989
29.2968	5.26121	73.5318	-3.78625	118.347	10.7501
29.3224	5.87973	73.5578	-4.14767	118.373	9.92101
29.3474	5.90934	73.5828	-3.67883	118.398	10.2811
29.3734	5.16062	73.6078	-3.24445	118.424	10.9168
29.3984	5.25064	73.6338	-3.63995	118.45	10.2463
29.4244	5.88321	73.6593	-3.75139	118.475	9.7787
29.4498	5.53027	73.6843	-3.13649	118.501	10.5113
29.4758	4.55877	73.7103	-3.08369	118.527	10.3303
29.5237	5.07698	73.7366	-3.55812	118.553	9.00653
29.5507	4.47487	73.7616	-3.161	118.578	8.31956
29.5763	3.97428	73.7877	3.30525	118.604	6.72808
29.6014	3.72429	73.8131	-3.17013	118.629	-4.08838
29.6274	-3.77266	73.8401	-3.09191	118.678	-4.22388
29.6535	-9.41426	73.866	3.51132	118.704	-3.88781
29.7208	-9.06876	73.8923	3.16908	118.73	-4.16214
29.7467	-8.45487	73.9183	-3.04535	118.756	-4.08814
29.7724	-8.66748	73.9433	3.51697	118.782	-3.17308
29.797	-8.35718	73.9693	3.68602	118.808	-3.02039
29.823	-7.36771	73.9951	3.17266	118.833	-3.43446
29.8485	-7.04107	74.0206	3.36971	118.859	3.17828
29.873	-7.29921	74.0466	3.94749	118.885	3.86992
29.8992	-6.88254	74.0715	4.28641	118.911	3.44822
29.9246	-6.12682	74.0975	14.6168	118.936	3.35309
29.9502	-6.25961	74.1659	15.9812	118.962	4.15414
29.9762	-6.39418	74.1907	15.8618	118.987	4.21998
30.002	-5.62237	74.2178	15.3328	119.012	3.70485
30.028	-5.34426	74.2442	15.9497	119.038	4.02413
30.053	-5.73755	74.2702	15.5862	119.064	4.62684
30.0792	-5.42761	74.2963	14.8426	119.089	4.01784
30.1047	-4.4441	74.3227	15.2086	119.116	4.04114
30.1532	-4.83418	74.3487	15.3207	119.142	4.70552
30.1793	-4.63341	74.3747	14.4334	119.167	4.60145
30.2048	-4.11062	74.4027	14.8563	119.193	4.23934
30.2295	-4.15408	74.4287	15.0089	119.218	4.40541
30.2549	-4.58713	74.4536	14.2515	119.245	4.93172
30.2809	-4.13463	74.4797	14.1792	119.27	4.40668
30.3059	-3.72645	74.5057	14.7392	119.296	4.41862
30.3319	-4.12951	74.5317	14.2912	119.322	4.96829
30.3569	-4.23248	74.5567	13.6981	119.347	4.88193
30.3829	-3.51328	74.5827	14.2053	119.372	4.54867
30.4102	-3.60191	74.6087	14.3001	119.398	4.62242
30.4349	-4.08102	74.6339	13.5183	119.423	5.85578
30.4606	-3.62514	74.6599	13.5809	119.491	5.4652
30.4866	-3.18387	74.686	14.1398	119.516	9.55662
30.5127	-3.65895	74.712	13.6727	119.542	14.4018
30.5373	3.89445	74.7369	13.1425	119.568	15.1136
30.564	12.6911	74.763	13.6884	119.592	14.4579
30.633	11.6854	74.7883	13.7359	119.618	14.6533
30.6584	11.1849	74.8153	12.9258	119.643	14.9106
30.6844	11.2628	74.8413	13.2689	119.669	13.5651
30.7111	10.1185	74.8673	13.6351	119.697	13.1857
30.7364	9.28477	74.8924	12.9627	119.722	13.7187
30.7629	9.51656	74.9193	12.7998	119.748	13.0425
30.7879	9.19268	74.9442	13.4289	119.773	12.1478
30.8134	8.14866	74.9703	13.0885	119.799	12.639
30.838	7.87168	74.9958	12.4823	119.825	12.7459
30.8646	8.30485	75.0218	12.9754	119.85	11.7143
30.89	7.81043	75.0478	13.0998	119.877	11.7118
30.915	6.96523	75.0747	12.3649	119.902	12.3763
30.941	7.24393	75.1007	12.5052	119.929	11.4831
30.9667	7.50363	75.127	12.6969	119.955	11.2395
30.9928	6.71045	75.1523	11.4683	119.982	11.9983
31.0175	6.42997	75.1783	9.94877	120.007	11.4632
31.0435	6.98418	75.2043	7.63666	120.034	10.7562
31.0681	6.82225	75.2293	-3.59885	120.06	11.4077
31.0945	5.9792	75.2788	-4.58468	120.086	11.5444
31.1197	6.20574	75.3038	-4.31174	120.111	10.606
31.1457	6.69176	75.3298	-4.29723	120.137	10.7195
31.1717	6.06918	75.3548	-4.79786	120.162	11.447
31.1968	5.60857	75.3798	-4.48513	120.188	10.8756
31.2218	6.15272	75.4068	-4.12248	120.214	10.2557
31.2479	6.31635	75.4322	-4.34725	120.239	10.9309
31.2728	5.59254	75.4573	-4.52336	120.265	11.1338
31.2988	5.4402	75.4833	-3.9126	120.29	10.1926
31.3229	6.07958	75.5083	-3.73883	120.316	10.2625
31.3489	5.91388	75.5339	-4.21319	120.341	11.0378
31.3748	5.17923	75.5599	-4.01173	120.367	10.5924
31.3998	5.4773	75.5849	-3.39274	120.393	9.88157
31.4258	5.99738	75.6109	-3.57428	120.419	10.4721
31.4518	5.31604	75.6359	-3.92559	120.444	10.849
31.4779	5.06814	75.6619	-3.37745	120.47	10.0304
31.5026	5.72264	75.6879	-3.08332	120.495	9.77527
31.5289	5.5725	75.7139	-3.63124	120.52	10.3647
31.5539	4.0416	75.7399	-3.35459	120.545	9.87343
31.6029	3.83225	75.7649	3.21651	120.571	8.18294
31.6279	-3.67872	75.7919	-3.08206	120.596	6.22281
31.6535	-9.36997	75.8167	-3.34426	120.622	-3.14525
31.7218	-9.00731	75.8426	3.27121	120.671	-4.44092
31.7477	-8.45326	75.8687	3.37727	120.697	-4.36356
31.7727	-8.66436	75.8946	-3.10607	120.722	-3.57921
31.7986	-8.30754	75.9196	3.14259	120.748	-3.59381
31.8236	-7.32561	75.9453	3.70091	120.773	-3.94957
31.8497	-7.094	75.9714	3.36184	120.799	-3.16665
31.8748	-7.35441	75.9974	3.15787	120.824	3.38622
31.8999	-6.83411	76.0236	3.79353	120.85	-3.06801
31.9258	-6.11342	76.0486	3.78098	120.876	3.15836
31.9518	-6.34107	76.0747	3.28729	120.902	3.99707
31.9769	-6.35933	76.1007	4.69468	120.928	3.80731
32.0029	-5.56191	76.1257	15.5579	120.953	3.45085
32.0277	-5.29703	76.1943	15.3384	120.979	4.16682
32.0538	-5.69032	76.2199	15.7088	121.005	4.37412
32.0797	-5.33847	76.2459	16.1175	121.031	3.82233
32.1061	-4.42064	76.2719	15.3436	121.057	4.00487
32.1539	-4.81631	76.2979	15.1133	121.083	4.69264
32.1791	-4.6043	76.3239	15.6315	121.109	4.22623
32.2052	-4.08414	76.35	15.1804	121.134	4.10836
32.232	-4.40062	76.3754	14.5077	121.159	4.70188
32.258	-4.50082	76.4014	14.9485	121.185	4.71913
32.283	-3.85231	76.4274	15.0178	121.211	4.2883
32.309	-3.84542	76.4536	14.2385	121.237	4.40005
32.3357	-4.33481	76.4786	14.2714	121.262	4.99295
32.361	-3.92452	76.5046	14.7917	121.287	4.59478
32.3867	-3.43895	76.5296	14.3095	121.313	4.46438
32.4128	-3.85317	76.5566	13.7518	121.339	4.79905
32.4378	-4.0049	76.5814	14.2642	121.365	4.99395
32.4628	-3.33766	76.6074	14.3358	121.391	4.57946
32.4895	-3.32679	76.6327	13.5426	121.416	4.59989
32.5147	-3.15413	76.6587	13.638	121.442	5.9358
32.5403	12.3526	76.6844	14.1803	121.509	7.5869
32.6088	12.5539	76.7104	13.6633	121.535	12.4832
32.6338	11.4324	76.7356	13.1804	121.561	15.1985
32.6598	11.0068	76.7626	13.7665	121.586	15.0898
32.6858	11.1205	76.7873	13.7352	121.612	14.3032
32.7118	10.09	76.8133	12.9885	121.637	14.6344
32.7371	9.25002	76.8393	13.2143	121.664	14.5418
32.7621	9.47028	76.8653	13.6772	121.689	13.3038
32.7878	9.25365	76.8908	13.0448	121.715	13.1333
32.8138	8.24792	76.9168	12.7386	121.742	13.5653
32.8388	8.01299	76.9419	13.3581	121.767	12.6826
32.8648	8.42652	76.9688	13.23	121.793	12.0556
32.8899	7.99702	76.9942	12.4956	121.819	12.7038
32.9147	7.10798	77.0198	12.9042	121.846	12.4834
32.9408	7.3209	77.0459	13.211	121.871	11.4698
32.9665	7.68581	77.0719	12.5018	121.898	11.8449
32.9922	6.9594	77.0983	12.4247	121.923	12.2549
33.0172	6.51101	77.1243	12.8112	121.949	11.3403
33.0432	7.16059	77.1493	11.9999	121.974	11.1452
33.0692	6.94179	77.1753	10.4964	122.001	11.9137
33.0952	6.14901	77.2	8.79638	122.026	11.3947
33.1197	6.27797	77.226	5.57478	122.052	10.674
33.1457	6.83903	77.2524	-4.46735	122.077	11.2978
33.1718	6.21275	77.3009	-4.34878	122.104	11.496
33.1977	5.77573	77.3269	-4.2799	122.129	10.5542
33.2238	6.44801	77.3529	-4.80142	122.155	10.6268
33.2497	6.33128	77.3793	-4.5954	122.181	11.3722
33.2747	5.53958	77.4037	-4.14886	122.207	10.823
33.3004	5.80794	77.4297	-4.29058	122.232	10.1896
33.3264	6.33418	77.4552	-4.57971	122.258	10.8373
33.3514	5.7612	77.4819	-3.90318	122.284	11.0996
33.3774	5.31557	77.5079	-3.83353	122.309	10.2098
33.4024	5.92936	77.5338	-4.32348	122.334	10.1864
33.4294	5.94695	77.5598	-3.89161	122.36	10.9693
33.4549	5.18666	77.5858	-3.40206	122.386	10.6013
33.4809	5.51232	77.6104	-3.77466	122.412	9.83659
33.5065	5.99612	77.6361	-3.89547	122.437	10.3772
33.5325	5.20347	77.6625	-3.24718	122.463	10.827
33.5585	4.41862	77.6885	-3.28092	122.488	9.91727
33.6067	4.22761	77.7146	-3.70075	122.515	9.92115
33.6326	-3.92678	77.7406	-3.22833	122.541	10.4281
33.6596	-8.92605	77.7656	3.16753	122.566	9.51265
33.7273	-8.65897	77.7916	-3.29158	122.591	7.8307
33.7535	-8.96504	77.8173	-3.2929	122.617	6.0508
33.7782	-8.75301	77.8433	3.35008	122.642	-3.39954
33.8037	-7.72747	77.8683	3.26548	122.692	-4.52281
33.8307	-7.53169	77.894	-3.18277	122.718	-3.93629
33.8567	-7.6533	77.92	3.30844	122.744	-3.59349
33.8828	-6.72445	77.946	3.63776	122.769	-3.99197
33.9083	-6.39554	77.972	3.16136	122.795	-3.62403
33.9343	-6.75455	77.9973	3.18554	122.821	3.20275
33.9595	-6.42811	78.0233	3.84293	122.847	-3.01736
33.9865	-5.67014	78.0497	3.57866	122.872	-3.21279
34.012	-5.98304	78.0745	3.50657	122.897	3.59615
34.038	-5.96866	78.1005	14.9436	122.923	3.92828
34.0637	-5.1984	78.1685	15.5634	122.95	3.37458
34.0897	-5.09568	78.2416	15.9762	122.976	3.58674
34.115	-5.49885	78.268	15.5733	123.001	4.36076
34.1407	-5.08819	78.2943	14.8858	123.027	4.08701
34.1657	-4.28836	78.3203	15.4491	123.052	3.77592
34.2148	-4.72957	78.3473	15.3931	123.077	4.28228
34.2408	-4.47292	78.3723	14.6432	123.103	4.61165
34.2657	-3.96974	78.3983	14.8364	123.129	4.03624
34.2923	-4.17985	78.4243	15.2591	123.155	4.11634
34.3168	-4.48357	78.45	14.574	123.181	4.81099
34.3428	-3.90311	78.4757	14.2734	123.206	4.53628
34.3688	-3.68875	78.5016	14.8283	123.231	4.27078
34.3948	-4.20127	78.5273	14.5475	123.257	4.49028
34.4194	-4.04027	78.5528	13.7975	123.282	4.97265
34.4454	-3.40046	78.5792	14.2124	123.307	4.48987
34.4712	-3.65407	78.6055	14.3485	123.333	4.43844
34.4977	-4.00346	78.6315	13.6283	123.359	5.00136
34.5227	3.48284	78.6572	13.6018	123.385	4.8109
34.5487	12.4939	78.6832	14.2182	123.412	4.55563
34.6157	11.7707	78.7103	13.6337	123.437	4.79772
34.6429	11.9367	78.7352	13.2319	123.462	9.98177
34.6689	11.6394	78.7613	13.8347	123.53	13.3168
34.6944	10.4138	78.7873	13.7274	123.557	14.9881
34.7194	10.0548	78.8122	12.9862	123.583	15.3866
34.745	10.3265	78.8392	13.2666	123.608	14.1817
34.771	9.71259	78.8646	13.6971	123.634	13.9394
34.7957	8.73844	78.8896	13.0607	123.66	14.2823
34.8231	9.12666	78.9156	12.7892	123.686	13.3327
34.8491	8.90764	78.9416	13.4595	123.712	12.7485
34.8751	7.94227	78.9686	13.0816	123.739	13.3868
34.9011	8.11043	78.9946	12.4954	123.766	12.77
34.9272	8.41768	79.0196	13.0173	123.791	11.8797
34.9522	7.67887	79.0456	13.1257	123.817	12.5241
34.9778	7.17817	79.0726	12.3425	123.843	12.4138
35.0038	7.80619	79.0986	12.744	123.869	11.407
35.0296	7.53033	79.1256	12.7918	123.895	11.8252
35.0556	6.69946	79.1517	11.4965	123.922	12.1478
35.0821	7.0954	79.1783	10.7713	123.948	11.1698
35.1069	7.38466	79.2043	8.93031	123.974	11.1286
35.1328	6.62069	79.2308	5.0637	124	11.8503
35.158	6.35459	79.2558	-4.17795	124.026	11.196
35.184	6.98044	79.3035	-4.2046	124.051	10.6441
35.21	6.84421	79.3293	-4.54915	124.077	11.3535
35.235	6.04836	79.3553	-4.79172	124.103	11.292
35.26	6.22267	79.3813	-4.23255	124.13	10.3866
35.2857	6.79837	79.4063	-4.18471	124.156	10.8988
35.3118	6.30329	79.4333	-4.63393	124.182	11.3014
35.3369	5.73481	79.4583	-4.27181	124.207	10.4291
35.3629	6.26257	79.484	-3.80025	124.233	10.2934
35.3877	6.50834	79.5103	-4.17535	124.258	11.0617
35.4128	5.80353	79.5356	-4.23576	124.284	10.79
35.4395	5.63494	79.5613	-3.58849	124.31	9.98072
35.4639	6.29063	79.5863	-3.52857	124.336	10.4631
35.49	6.14408	79.6123	-3.98606	124.361	10.9805
35.5154	5.39617	79.6383	-3.60413	124.387	10.0754
35.5415	5.71584	79.6648	-3.12381	124.413	9.96631
35.5675	5.79483	79.6898	-3.51699	124.439	10.7892
35.5925	3.20402	79.7149	-3.63136	124.464	10.5343
35.6417	-4.54602	79.7409	3.01481	124.489	9.70095
35.6687	-8.55286	79.7669	3.06358	124.515	9.98651
35.7359	-9.21277	79.7917	-3.41938	124.541	10.2268
35.7619	-8.55968	79.8183	-3.11083	124.566	8.7921
35.7875	-7.80849	79.8433	3.42382	124.592	6.7856
35.8133	-7.9853	79.8693	3.07628	124.618	3.16781
35.8393	-7.62762	79.8944	-3.13805	124.666	-4.14021
35.8657	-6.7005	79.9205	3.47524	124.692	-4.5005
35.891	-6.63144	79.9464	3.55951	124.718	-3.66815
35.9161	-6.86939	79.9715	3.05869	124.744	-3.61746
35.9423	-6.25606	79.9973	3.38309	124.77	-3.94983
35.9672	-5.7081	80.0235	3.86908	124.796	-3.26131
35.993	-6.02757	80.0495	3.4761	124.822	3.31207
36.0188	-5.98842	80.0755	3.32477	124.847	-3.1261
36.0441	-5.21017	80.1012	4.80471	124.873	-3.01784
36.0701	-5.05071	80.1273	15.0176	124.899	3.87912
36.0951	-5.45223	80.1944	15.2881	124.924	3.85297
36.1211	-5.13201	80.2213	16.0699	124.95	3.37884
36.1457	-4.25402	80.2473	15.7897	124.975	3.87525
36.1943	-4.64659	80.2735	15.0944	125.001	4.39148
36.2203	-4.46511	80.2995	15.5314	125.027	3.83156
36.2463	-3.9178	80.3251	15.5314	125.053	3.91341
36.2723	-4.09539	80.3511	14.7238	125.079	4.65614
36.2973	-4.43344	80.3771	14.7425	125.105	4.31496
36.3229	-3.89214	80.4031	15.2402	125.131	4.08591
36.3483	-3.57073	80.4293	14.5106	125.156	4.41976
36.3743	-4.05909	80.4553	14.234	125.181	4.84219
36.3993	-4.05441	80.4809	14.7982	125.207	4.31787
36.4246	-3.4001	80.5069	14.5412	125.232	4.30881
36.4501	-3.43544	80.5329	13.8217	125.258	4.86268
36.4762	-3.95101	80.5581	14.2077	125.283	4.81019
36.503	-3.43766	80.5851	14.4119	125.309	4.44744
36.5282	3.13336	80.6104	13.6358	125.334	4.54803
36.5543	11.8087	80.6368	13.794	125.36	5.1
36.6213	12.5112	80.6634	14.2543	125.386	4.61306
36.6483	12.6222	80.6894	13.6192	125.411	4.59009
36.6743	11.3521	80.7153	13.295	125.438	5.94145
36.7004	10.9116	80.7404	13.9116	125.506	7.89586
36.7263	11.0739	80.766	13.7329	125.531	12.3003
36.7523	10.1531	80.793	13.0142	125.557	15.0358
36.778	9.30958	80.818	13.3623	125.583	15.2379
36.8037	9.70217	80.844	13.7287	125.609	14.2636
36.83	9.26299	80.87	13.0239	125.634	14.2831
36.856	8.37035	80.8953	12.8881	125.661	14.4559
36.882	8.57603	80.9209	13.5174	125.685	13.3399
36.9079	8.80339	80.9479	13.0928	125.712	12.9773
36.9331	7.94625	80.9739	12.5884	125.739	13.5813
36.9592	7.6499	80.9992	13.1588	125.765	12.6727
36.9847	8.19664	81.0248	13.2097	125.792	12.1554
37.0108	7.92373	81.0515	12.4719	125.818	12.8045
37.0357	7.09172	81.0773	12.6406	125.844	12.3139
37.0618	7.43119	81.1033	13.0522	125.869	11.4559
37.0877	7.73846	81.1283	12.1828	125.895	12.1294
37.1138	6.99362	81.1543	11.1275	125.922	12.1387
37.1389	6.70883	81.1803	10.2771	125.947	11.1679
37.1647	7.34655	81.2063	7.14528	125.973	11.4235
37.1903	7.17566	81.2313	-3.84545	126	11.9238
37.2156	6.37951	81.2803	-4.04551	126.026	11.0559
37.2416	6.68607	81.3065	-4.28632	126.051	10.7843
37.268	7.13017	81.3325	-4.79175	126.077	11.6024
37.293	6.4866	81.3581	-4.44056	126.103	11.1999
37.3187	6.127	81.3831	-4.07705	126.129	10.4412
37.3437	6.74904	81.4091	-4.36111	126.156	11.0295
37.3697	6.75105	81.4351	-4.45789	126.18	11.3484
37.3957	5.93289	81.4611	-3.84912	126.207	10.4278
37.4217	6.20119	81.4861	-3.83905	126.232	10.3832
37.4467	6.73943	81.5121	-4.28682	126.257	11.1505
37.4719	6.21459	81.5371	-3.94904	126.283	10.8108
37.4979	5.73548	81.5627	-3.38383	126.309	10.0425
37.5237	6.33032	81.5888	-3.74972	126.334	10.5757
37.5495	6.35013	81.6148	-3.88335	126.359	11.0182
37.5761	5.32063	81.6398	-3.21184	126.386	10.2003
37.6021	5.17717	81.6659	-3.1604	126.412	10.0845
37.6271	-3.10445	81.6915	-3.62519	126.438	10.8547
37.6763	-8.89776	81.7175	-3.24783	126.463	10.5915
37.7437	-8.48944	81.7435	3.17146	126.489	9.75343
37.7696	-8.22645	81.7695	-3.28279	126.514	10.0765
37.7947	-8.52419	81.7949	-3.2454	126.54	10.3449
37.8207	-7.92916	81.8209	3.40033	126.564	9.14606
37.847	-7.07876	81.8473	3.26762	126.59	7.13226
37.8722	-7.16115	81.8723	-3.14878	126.616	5.21013
37.8973	-7.28438	81.8979	3.25865	126.641	-3.90401
37.9235	-6.52366	81.9229	3.70333	126.691	-4.57423
37.9485	-6.01271	81.9489	3.266	126.716	-3.78385
37.9745	-6.38235	81.9749	3.17625	126.742	-3.5728
38.0005	-6.11392	82.0006	3.82117	126.768	-3.94467
38.0257	-5.3224	82.0266	3.77459	126.794	-3.2677
38.0517	-5.34345	82.0515	3.28609	126.82	3.31646
38.0767	-5.6846	82.0779	3.7424	126.846	-3.10147
38.1028	-5.01009	82.1036	14.734	126.872	-3.01235
38.1291	-4.53732	82.172	15.0722	126.897	3.88096
38.1784	-4.80998	82.1983	15.8618	126.923	3.89537
38.2041	-4.19954	82.2246	16.1579	126.947	3.40474
38.2301	-4.09035	82.2496	15.3834	126.973	3.86578
38.2561	-4.56884	82.2756	15.3354	126.999	4.43162
38.2821	-4.28019	82.3024	15.7896	127.025	3.93298
38.3071	-3.73954	82.3284	15.133	127.051	3.86208
38.333	-3.98885	82.3539	14.6678	127.077	4.59187
38.359	-4.25679	82.3799	15.1944	127.102	4.52224
38.3848	-3.59636	82.405	15.0452	127.128	4.09699
38.4098	-3.51508	82.431	14.2392	127.154	4.49776
38.4358	-4.04961	82.458	14.5781	127.18	4.83989
38.4608	-3.81947	82.483	14.8705	127.205	4.30745
38.4869	-3.1927	82.509	14.0994	127.231	4.33433
38.5121	-3.37482	82.535	13.9946	127.256	4.87621
38.5378	11.7389	82.5616	14.5829	127.282	4.80531
38.6057	12.9521	82.5872	14.1486	127.307	4.46446
38.6317	12.5731	82.6121	13.544	127.333	4.60714
38.6578	11.4211	82.6383	14.0243	127.359	5.70658
38.6834	11.5424	82.6634	14.1927	127.427	4.65789
38.7098	11.3065	82.6905	13.4202	127.476	5.05281
38.7354	10.0541	82.716	13.4213	127.501	14.4973
38.7608	9.93542	82.741	14.0072	127.569	14.5017
38.7866	10.23	82.767	13.5983	127.595	15.2427
38.8126	9.47647	82.793	13.0128	127.621	14.9059
38.8376	8.69735	82.818	13.5254	127.647	13.6076
38.8633	8.99074	82.844	13.687	127.672	13.5816
38.8893	9.01591	82.87	12.9434	127.698	13.9729
38.9145	8.12426	82.896	12.9994	127.724	13.0311
38.9401	7.99471	82.9216	13.5718	127.749	12.4436
38.966	8.51546	82.9476	12.927	127.775	13.0749
38.992	7.97085	82.9746	12.6996	127.802	12.7629
39.0174	7.31492	83.0006	13.3559	127.828	11.7483
39.0435	7.76458	83.0267	12.9965	127.854	12.1595
39.069	7.85708	83.052	12.4143	127.879	12.4604
39.0951	7.012	83.0783	12.9496	127.905	11.4915
39.1202	7.01704	83.1043	12.9467	127.931	11.4835
39.1461	7.61249	83.1309	11.8608	127.957	12.1411
39.1711	7.25837	83.1558	11.3671	127.984	11.4949
39.1971	6.52287	83.1828	10.4097	128.009	10.8676
39.2221	6.8752	83.2073	6.87086	128.035	11.587
39.2488	7.28351	83.2333	-3.58497	128.061	11.6164
39.2734	6.61583	83.2822	-3.96831	128.087	10.6337
39.2993	6.27073	83.3082	-4.54808	128.113	10.9972
39.3247	6.8893	83.3343	-4.72512	128.138	11.5361
39.3507	6.7873	83.3593	-4.18142	128.164	10.7191
39.3766	6.0422	83.3853	-4.1118	128.189	10.4318
39.4026	6.33159	83.4101	-4.5531	128.215	11.1905
39.4276	6.85041	83.4364	-4.33546	128.241	11.0334
39.4536	6.29969	83.4614	-3.76971	128.267	10.1743
39.4786	5.84446	83.4874	-3.96161	128.292	10.5457
39.5037	6.45766	83.5125	-4.27463	128.317	11.1479
39.53	6.50859	83.5385	-3.74933	128.344	10.2359
39.5563	5.61644	83.5634	-3.40756	128.37	10.0831
39.5813	5.39254	83.5891	-3.88998	128.395	10.8552
39.6073	5.35748	83.6151	-3.74493	128.42	10.7477
39.6324	-4.7356	83.6411	-3.10645	128.446	9.86914
39.6813	-8.64145	83.6659	-3.25516	128.472	10.1959
39.7491	-8.26125	83.6919	-3.6423	128.497	10.8531
39.7756	-8.54288	83.718	-3.10851	128.523	10.1122
39.7999	-8.15867	83.7432	3.19612	128.548	9.27448
39.8264	-7.20956	83.7692	-3.2794	128.573	9.33903
39.8517	-7.09877	83.7952	-3.20126	128.599	8.0713
39.8767	-7.38649	83.8212	3.43829	128.624	-3.54107
39.9024	-6.79041	83.8462	3.2921	128.674	-3.9217
39.9284	-6.0748	83.8722	-3.1231	128.699	-3.84266
39.9534	-6.22696	83.8973	3.34828	128.725	-4.33425
39.9788	-6.37403	83.9235	3.70915	128.75	-4.08557
40.0042	-5.69568	83.9485	3.2424	128.776	-3.15405
40.0292	-5.24826	83.9745	3.31676	128.801	-3.16034
40.0547	-5.63321	84.0005	3.91463	128.827	-3.58354
40.0808	-5.49098	84.0273	3.68646	128.853	3.08883
40.1057	-4.43656	84.0519	3.32312	128.878	3.76234
40.1547	-4.6775	84.0779	4.04752	128.904	3.29816
40.1793	-4.73436	84.1032	14.9259	128.93	3.33075
40.2054	-4.04185	84.1712	15.1761	128.955	4.14383
40.2307	-3.97883	84.1962	15.8719	128.98	4.16204
40.2567	-4.54913	84.2233	16.1588	129.006	3.66474
40.2819	-4.2256	84.2493	15.3721	129.033	4.06151
40.3079	-3.6699	84.2753	15.3138	129.058	4.61456
40.3329	-3.93182	84.3013	15.8183	129.083	4.13265
40.3589	-4.28722	84.3269	15.2793	129.109	4.04074
40.3839	-3.60283	84.353	14.6815	129.134	4.58818
40.4105	-3.40662	84.3783	15.1805	129.159	4.76628
40.4355	-4.01158	84.4043	15.1272	129.185	4.2691
40.4614	-3.89684	84.4303	14.3214	129.21	4.31726
40.4864	-3.16472	84.4563	14.4651	129.236	4.95736
40.5121	-3.31556	84.4823	14.9173	129.262	4.72987
40.5377	-3.23862	84.5083	14.1977	129.287	4.47983
40.5637	12.6845	84.5343	13.9586	129.314	4.78038
40.6307	12.7419	84.5593	14.5465	129.339	5.04259
40.6575	11.6982	84.585	14.3407	129.365	4.6172
40.6835	11.682	84.6111	13.5862	129.39	4.64386
40.7094	11.5391	84.6379	14.0714	129.415	6.04587
40.7361	10.3127	84.6639	14.2247	129.482	5.55129
40.7614	10.0316	84.6899	13.388	129.509	8.29289
40.7867	10.3176	84.7159	13.5588	129.535	13.8863
40.8127	9.62926	84.7419	14.0641	129.562	15.2144
40.8377	8.77489	84.7679	13.3264	129.587	14.813
40.8637	9.00478	84.7949	13.1956	129.614	15.3622
40.8887	9.1794	84.8199	13.8066	129.639	14.9947
40.9147	8.30272	84.8458	13.468	129.665	13.6169
40.9397	7.94165	84.8718	12.8482	129.692	13.7895
40.9658	8.48857	84.8978	13.4831	129.718	14.0346
40.9907	8.23283	84.9239	13.4422	129.744	13.0288
		84.9498	12.7001	129.769	12.611
		84.9758	12.9675	129.796	13.2923
		85.0018	13.4224	129.822	12.5722
		85.0278	12.7817	129.848	11.8945
		85.0548	12.6492	129.873	12.5652
		85.0811	13.251	129.899	12.4574
		85.1061	12.7227	129.925	11.4739
		85.1322	11.8986	129.952	11.7876
		85.1583	11.8734	129.977	12.2855
		85.1846	10.5358	130.003	11.3854
		85.2096	6.9617	130.029	11.1741
		85.2356	-3.05825	130.056	12.0348
		85.2846	-3.97117	130.133	11.5519
		85.3106	-4.76512	130.159	11.572
		85.3373	-4.37829	130.185	10.6321
		85.3623	-4.12826	130.211	10.9916
		85.3881	-4.43076	130.237	11.5313
		85.4131	-4.54011	130.262	10.7657
		85.4381	-3.95988	130.288	10.5199
		85.4642	-3.81099	130.315	11.3208
		85.4891	-4.28781	130.341	10.9495
		85.5152	-4.00818	130.366	10.1817
		85.5421	-3.44446	130.392	10.7072
		85.5671	-3.82802	130.417	11.1468
		85.5932	-3.91474	130.443	10.2998
		85.6192	-3.25148	130.468	10.135
		85.6452	-3.30745	130.495	10.9463
		85.6712	-3.70394	130.52	10.7021
		85.6972	-3.24839	130.546	9.55507
		85.7222	3.16665	130.572	9.57898
		85.7492	-3.36845	130.598	8.79856
		85.7752	-3.20837	130.623	5.57942
		85.8003	3.41692	130.649	-3.79223
		85.8257	3.209	130.697	-3.71067
		85.8527	-3.13332	130.723	-4.21696
		85.8777	3.44808	130.749	-4.0962
		85.9037	3.60784	130.774	-3.16647
		85.9297	3.11356	130.8	-3.04103
		85.9557	3.386	130.825	-3.45517
		85.9818	3.89433	130.851	3.14803
				130.877	3.88742
				130.902	3.4811
				130.928	3.4062
				130.954	4.20591
				130.98	4.2702

## Sheet: Fig. 4l
x-axis-Time (s)	y-axis-Output Voltage (V)
0.01445	22.2288
0.04093	22.3079
0.06793	21.795
0.09394	21.5064
0.11976	21.6924
0.14577	21.3813
0.17098	20.8757
0.19698	20.9898
0.22299	21.0506
0.249	20.5258
0.27455	20.3154
0.30056	20.6053
0.32554	20.3625
0.35255	19.9315
0.3777	20.1195
0.40371	20.1855
0.42922	19.7966
0.45523	19.7789
0.48123	19.9885
0.50624	19.6703
0.53292	19.37
0.55891	19.5972
0.58497	19.4945
0.61098	19.151
0.63598	19.3428
0.66299	19.4853
0.68799	19.0873
0.714	18.988
0.73901	19.2892
0.76601	19.0947
0.7913	18.7071
0.81732	18.5697
0.84237	17.7047
0.86838	15.1429
0.89538	10.6328
0.92108	5.688
0.94608	2.79105
0.97208	1.54506
0.99762	1.45451
1.02364	1.76586
1.04864	1.67926
1.07455	1.94039
1.10056	2.39791
1.12534	2.41023
1.15135	2.29421
1.17636	2.59059
1.20236	2.82607
1.22737	2.59781
1.25337	2.60052
1.27838	2.91905
1.30439	2.88131
1.32962	2.61012
1.35569	2.79788
1.3814	3.05269
1.40641	2.84402
1.4322	2.69148
1.45719	2.99942
1.4832	3.05713
1.5082	2.75628
1.53421	2.8259
1.55922	3.13229
1.58555	2.99407
1.61056	2.75235
1.63545	2.94761
1.66146	3.17727
1.68646	2.93329
1.71247	2.81308
1.73848	3.12497
1.76348	3.12656
1.78949	5.71403
1.81449	13.7346
1.8395	19.0768
1.86651	21.1599
1.89152	21.6391
1.91752	21.7616
1.94353	21.3569
1.96953	20.69
1.99554	20.6282
2.02167	20.6
2.04668	20.128
2.07268	19.97
2.09869	20.3143
2.12469	20.0721
2.1507	19.6642
2.1757	19.9187
2.20271	19.9657
2.22826	19.4898
2.25427	19.5658
2.28027	19.8434
2.30628	19.5469
2.33128	19.2306
2.35729	19.5589
2.3833	19.4363
2.4093	19.0296
2.43531	19.1524
2.46031	19.367
2.48658	19.0517
2.51258	18.9958
2.53859	19.3115
2.5646	19.1281
2.58972	18.8813
2.61561	19.1972
2.64162	19.2694
2.66762	18.833
2.69364	18.8662
2.71965	19.2395
2.74467	18.974
2.77053	18.6791
2.79654	18.8506
2.82354	18.1665
2.84879	16.2585
2.8748	13.3376
2.89967	1.90157
2.99084	1.35433
3.01585	1.83361
3.04074	2.17907
3.06675	2.10439
3.09276	2.23956
3.11776	2.67171
3.14277	2.73246
3.16877	2.50834
3.19578	2.78534
3.22079	3.00491
3.24679	2.77463
3.2718	2.71145
3.2968	3.02606
3.32281	3.00951
3.349	2.72382
3.375	2.95193
3.40001	3.14897
3.42602	2.90603
3.45102	2.80801
3.47703	3.09188
3.50203	3.1143
3.52804	2.80792
3.55327	2.93187
3.57929	3.19093
3.60529	2.95168
3.63029	2.79767
3.6563	3.13978
3.6823	3.11532
3.70831	2.7862
3.73432	2.95813
3.75932	3.20626
3.78533	4.82726
3.81033	12.4514
3.83634	18.4959
3.86134	21.0911
3.88735	21.6688
3.91336	21.7875
3.93953	21.8622
3.96437	21.4019
3.99037	20.8887
4.01538	20.9657
4.04139	20.8653
4.06739	20.362
4.0934	20.3518
4.1194	20.4032
4.14541	19.9659
4.17081	19.8179
4.19686	20.128
4.22285	19.9436
4.24886	19.5552
4.27455	19.7578
4.29956	19.9042
4.32556	19.4909
4.35313	19.4146
4.37814	19.7501
4.40415	19.4093
4.42915	19.0145
4.45516	19.2696
4.48111	19.2964
4.50712	18.8392
4.53313	18.8831
4.55913	19.0718
4.58514	18.6993
4.61114	18.5856
4.63815	18.8317
4.66316	18.5914
4.68916	18.3525
4.71517	18.675
4.74217	18.5786
4.76718	18.2334
4.79419	18.365
4.81919	18.0065
4.8452	16.3127
4.8712	13.5215
4.89621	1.66093
4.98659	0.86741
5.01359	1.27938
5.0396	1.62618
5.06461	1.55493
5.09061	1.69901
5.11662	2.20082
5.14162	2.25045
5.16763	2.10056
5.19263	2.41917
5.21964	2.71765
5.24465	2.52018
5.27056	2.555
5.29657	2.9372
5.32157	2.93718
5.34758	2.72852
5.37277	2.97845
5.39877	3.26293
5.42378	3.10017
5.44979	3.01933
5.47517	3.35089
5.50118	3.40136
5.52618	3.14958
5.55119	3.27148
5.57719	3.58771
5.6032	3.46558
5.6282	3.28121
5.65321	3.5389
5.67921	3.73747
5.70522	3.4783
5.73032	3.53539
5.75633	3.87594
5.78234	4.85037
5.80734	11.9093
5.83335	18.5682
5.85835	21.7255
5.88436	22.5565
5.91014	22.6376
5.93616	22.8684
5.96216	22.3867
5.98869	21.799
6.0137	21.8777
6.0397	21.8597
6.06571	21.3127
6.09072	21.1353
6.11672	21.3604
6.14263	21.0668
6.16864	20.7694
6.19471	20.9677
6.22072	20.8559
6.24673	20.451
6.27172	20.5687
6.2974	20.7863
6.32341	20.4508
6.34927	20.3141
6.37528	20.6462
6.40007	20.51
6.42607	20.1239
6.45208	20.2766
6.47809	20.5071
6.50409	20.0736
6.5291	19.9223
6.5551	20.2967
6.58111	20.2744
6.60712	19.9163
6.63212	20.0763
6.65813	20.3136
6.68413	19.9701
6.71014	19.9011
6.73614	20.1965
6.76166	20.0299
6.78767	19.6947
6.81267	19.5849
6.83868	18.8198
6.86469	16.7244
6.89079	13.1342
6.9158	2.3114
7.00658	1.80405
7.03158	2.2114
7.05659	2.61543
7.08239	2.5848
7.1084	2.62696
7.1344	3.05179
7.15941	3.12256
7.18549	2.93196
7.21149	3.2072
7.2385	3.38873
7.26351	3.1473
7.28951	3.16001
7.31552	3.47262
7.34152	3.33171
7.36653	3.09341
7.39254	3.34157
7.41754	3.54437
7.44355	3.27113
7.46855	3.19415
7.49456	3.53389
7.52057	3.4319
7.54657	3.1822
7.57258	3.4043
7.59758	3.56608
7.62359	3.26351
7.64959	3.25254
7.6746	3.57212
7.70161	3.4144
7.72661	3.19978
7.75262	3.49348
7.77862	3.94649
7.80463	21.5999
7.89567	22.7138
7.92268	22.3804
7.94869	21.9957
7.97469	22.0154
8.0007	21.5983
8.0267	21.1307
8.05171	21.1709
8.07799	21.104
8.10401	20.6381
8.13001	20.6561
8.15601	20.8087
8.18302	20.3825
8.2079	20.2203
8.23491	20.6274
8.26092	20.4305
8.28692	20.0571
8.31193	20.3266
8.33893	20.4348
8.36394	19.9859
8.39094	20.1038
8.41695	20.3263
8.44296	19.9444
8.46896	19.988
8.49497	20.294
8.52098	20.0663
8.54698	19.8161
8.57299	20.15
8.59899	20.0785
8.625	19.7155
8.651	19.9683
8.67701	20.1043
8.70388	19.6283
8.72889	19.6763
8.7559	20.0033
8.7819	19.6956
8.80809	19.4577
8.8341	19.3429
8.86006	17.9794
8.88608	15.167
8.91107	10.4582
8.93708	5.5945
8.96309	3.05741
8.9891	2.12954
9.0141	2.18089
9.0401	2.25948
9.06711	2.31396
9.09242	2.84806
9.11842	2.97847
9.14443	2.81171
9.17044	3.10386
9.19644	3.37688
9.22245	3.14645
9.24745	3.12407
9.27246	3.45096
9.29847	3.49081
9.32347	3.19392
9.34948	3.36959
9.37548	3.62969
9.40154	3.36384
9.42755	3.29887
9.45356	3.63524
9.47956	3.52196
9.50557	3.298
9.53157	3.5654
9.55758	3.67353
9.58263	3.33857
9.60862	3.43576
9.63463	3.7071
9.65963	3.52222
9.68664	3.31723
9.71165	3.64817
9.73765	3.62854
9.76366	3.31316
9.79049	3.77613
9.8155	21.7593
9.90659	22.5276
9.93361	22.8066
9.96062	22.2714
9.98662	21.754
10.0126	21.8483
10.0396	21.4158
10.0686	21.0295
10.0946	21.2012
10.1206	20.7855
10.1466	20.5035
10.1727	20.7247
10.1989	20.5514
10.225	20.193
10.251	20.4262
10.277	20.412
10.303	20.0041
10.3291	20.1161
10.3551	20.2798
10.3811	19.8849
10.4071	19.7801
10.4331	20.2193
10.4581	20.1071
10.4841	19.754
10.5101	20.0232
10.5361	20.2067
10.5621	19.8259
10.5871	19.7859
10.6131	20.1205
10.6391	19.9379
10.6661	19.6156
10.6921	19.924
10.7181	19.856
10.7441	19.5381
10.7701	19.7554
10.7962	19.7579
10.8227	18.8103
10.8488	17.8145
10.8748	15.3943
10.9018	2.51105
10.9924	2.29242
11.0184	2.34659
11.0455	2.33656
11.0715	2.88945
11.0975	3.02614
11.1235	2.91653
11.1505	3.32435
11.1765	3.48319
11.2025	3.18926
11.2285	3.40949
11.2546	3.70276
11.2796	3.4677
11.3056	3.38655
11.3316	3.71721
11.3586	3.64243
11.3836	3.41057
11.4116	3.75047
11.4366	3.74289
11.4636	3.44761
11.4896	3.66762
11.5156	3.83575
11.5416	3.49434
11.5676	3.63314
11.5946	3.87091
11.6196	3.5933
11.6456	3.51142
11.6716	3.86456
11.6976	3.74026
11.7236	3.47161
11.7497	3.73623
11.7757	3.88418
11.8017	6.04577
11.8277	14.5309
11.8547	20.0927
11.8807	22.0498
11.9057	22.829
11.9317	23.1366
11.9587	22.6944
11.9847	22.2267
12.0107	22.3576
12.0367	22.0658
12.0628	21.5282
12.0888	21.7335
12.1168	21.6664
12.1428	21.1054
12.1688	21.2259
12.1959	21.2064
12.2218	20.5871
12.2489	20.5241
12.2749	20.4519
12.3009	19.9498
12.3269	19.8479
12.3529	20.006
12.379	19.6275
12.405	19.5185
12.431	19.8413
12.457	19.636
12.4831	19.3519
12.51	19.8062
12.5361	19.7454
12.5621	19.3337
12.5881	19.6187
12.6151	19.7614
12.6411	19.2948
12.6671	19.3228
12.6931	19.6354
12.7201	19.2704
12.7461	19.0858
12.7741	19.3132
12.8001	18.8853
12.8261	18.5572
12.8531	17.6842
12.8791	15.0825
12.9051	10.4204
12.9312	5.5747
12.9572	2.92138
12.9832	1.6732
13.0092	1.69421
13.0352	1.98173
13.0622	1.83424
13.0882	2.24616
13.1142	2.61
13.1412	2.43765
13.1662	2.65385
13.1932	2.97485
13.2192	2.78347
13.2452	2.80214
13.2722	3.15694
13.2982	2.91917
13.3252	2.8976
13.3512	3.27897
13.3773	3.09811
13.4043	2.9336
13.4303	3.2976
13.4563	3.16687
13.4833	2.9455
13.5093	3.26261
13.5373	3.17883
13.5633	3.00583
13.5893	3.33536
13.6163	3.25633
13.6423	2.99944
13.6683	3.29095
13.6953	3.28096
13.7213	3.00212
13.7483	3.27805
13.7743	3.38337
13.8003	4.62495
13.8263	12.5034
13.8534	18.8033
13.8794	20.9405
13.9064	21.8855
13.9334	22.1407
13.9604	21.5723
13.9864	21.4314
14.0134	21.4232
14.0394	20.8707
14.0664	20.8888
14.0924	20.9901
14.1184	20.5055
14.1454	20.5128
14.1714	20.8457
14.1974	20.5696
14.2244	20.3935
14.2505	20.7684
14.2774	20.5816
14.3035	20.4467
14.3295	20.8459
14.3565	20.666
14.3845	20.5739
14.4105	20.8322
14.4375	20.4257
14.4635	20.3496
14.4905	20.794
14.5165	20.5444
14.5435	20.2701
14.5695	20.6129
14.5965	20.411
14.6235	20.1172
14.6495	20.4423
14.6755	20.2646
14.7026	20.0767
14.7286	20.3329
14.7566	20.1106
14.7826	19.87
14.8096	20.137
14.8356	19.3943
14.8616	17.8369
14.8886	15.6547
14.9146	10.5547
14.9406	5.15576
14.9676	3.23555
14.9936	2.44932
15.0206	1.94926
15.0466	2.38361
15.0736	2.69298
15.0996	2.58377
15.1266	2.96453
15.1537	3.22078
15.1807	2.98571
15.2077	3.341
15.2347	3.4855
15.2607	3.22191
15.2877	3.54112
15.3137	3.63633
15.3407	3.34614
15.3667	3.57271
15.3937	3.71621
15.4197	3.445
15.4467	3.68824
15.4727	3.84333
15.5007	3.5071
15.5267	3.83101
15.5537	3.91847
15.5808	3.59111
15.6077	3.90602
15.6348	3.91932
15.6608	3.61939
15.6878	3.93478
15.7148	3.93378
15.7408	3.72055
15.7678	4.09169
15.7938	4.55218
15.8218	11.4574
15.8478	19.0067
15.8748	22.027
15.9048	23.1547
15.9314	23.5557
15.9584	22.9387
15.9854	22.6964
16.0114	22.6655
16.0384	22.0931
16.0654	22.0802
16.0924	22.0494
16.1194	21.4731
16.1464	21.6057
16.1724	21.6666
16.2006	21.0848
16.2274	21.3567
16.2544	21.2179
16.2804	20.7644
16.3074	20.9564
16.3334	20.9142
16.3605	20.5551
16.3875	20.879
16.4145	20.6663
16.4415	20.3287
16.4685	20.7518
16.4945	20.5006
16.5215	20.1135
16.5485	20.4907
16.5765	20.2521
16.6035	20.0998
16.6305	20.3485
16.6565	20.0103
16.6845	20.015
16.7115	20.1753
16.7385	19.6515
16.7655	19.819
16.7921	20.0457
16.8191	19.2137
16.8461	18.6033
16.8731	16.7344
16.9001	12.3426
16.9274	2.26733
17.0181	1.85756
17.0472	2.37023
17.0732	2.54145
17.1012	2.54067
17.1282	3.05667
17.1552	3.04347
17.1822	2.99915
17.2092	3.44172
17.2362	3.20466
17.2642	3.26599
17.2927	3.44545
17.3206	3.1916
17.3476	3.55165
17.3756	3.3605
17.4026	3.30318
17.4296	3.6362
17.4556	3.38628
17.4826	3.35664
17.5106	3.67284
17.5496	3.66996
17.577	3.33955
17.604	3.41252
17.631	3.65786
17.658	3.27448
17.685	3.52654
17.7122	3.57645
17.7403	3.27306
17.7673	3.58495
17.7943	3.76207
17.8215	21.748
17.9118	22.5916
17.9398	22.1925
17.9669	22.2438
17.9938	21.7791
18.0209	21.295
18.0479	21.4836
18.0759	20.8391
18.1042	20.5331
18.1312	20.5549
18.1582	19.9428
18.1876	20.1023
18.2156	19.6617
18.2426	19.5695
18.2716	19.7705
18.2986	19.2296
18.3256	19.5058
18.3546	19.3639
18.3816	19.1351
18.4096	19.4008
18.4366	18.9283
18.4646	19.1306
18.4916	19.1143
18.5206	18.802
18.5476	19.2579
18.5746	18.9547
18.6016	18.7852
18.6297	19.1292
18.6567	18.7006
18.6847	18.8989
18.7127	18.9263
18.7417	18.6827
18.7697	19.0982
18.7967	18.5443
18.8237	18.3594
18.8517	17.5205
18.8797	14.8379
18.9077	2.09863
18.9982	1.12226
19.0252	1.5022
19.0522	1.71716
19.0802	1.72481
19.1072	2.31273
19.1352	2.24294
19.1632	2.48446
19.1912	2.67683
19.2192	2.4246
19.2472	2.86191
19.2752	2.66682
19.3023	2.75117
19.3292	3.01822
19.3573	2.67897
19.3843	2.96466
19.4113	3.02069
19.4393	2.76056
19.4663	3.16499
19.4933	3.02263
19.5214	2.93063
19.5484	3.28051
19.5754	2.95879
19.6034	3.13442
19.6314	3.22671
19.6594	2.98858
19.6874	3.40039
19.7155	3.099
19.743	3.21853
19.771	3.37431
19.8	3.89793
19.828	12.1663
19.855	18.2569
19.883	21.1697
19.911	22.355
19.938	21.9208
19.966	22.0072
19.994	21.4827
20.021	21.271
20.049	21.2558
20.0811	20.6652
20.108	20.9388
20.1351	20.3899
20.1631	20.4029
20.1911	20.4179
20.2191	20.0597
20.2461	20.3611
20.2741	19.9239
20.3021	19.899
20.3291	20.1135
20.3571	19.6029
20.3841	19.8634
20.4121	19.8034
20.4401	19.5447
20.4671	19.8733
20.4951	19.4773
20.5232	19.7015
20.5511	19.7294
20.5782	19.3505
20.6062	19.7996
20.6342	19.5952
20.6622	19.6541
20.6902	19.8141
20.7182	19.4875
20.7462	20.0369
20.7742	19.7491
20.8022	19.7242
20.8292	19.6062
20.8572	18.227
20.8852	16.3433
20.9122	11.3917
20.9402	5.58327
20.9683	3.61662
20.9952	2.29821
21.0233	2.4636
21.0513	2.78687
21.0793	2.80849
21.1063	3.35741
21.1343	3.24924
21.1623	3.51559
21.1903	3.73457
21.2183	3.47603
21.2463	3.91417
21.2743	3.63172
21.3023	3.73152
21.3303	3.91773
21.3584	3.65835
21.3864	4.05331
21.4144	3.71557
21.4434	3.89957
21.4704	3.97717
21.4984	3.71492
21.5265	4.0891
21.5535	3.78153
21.5815	3.9059
21.6095	4.04686
21.6375	3.71524
21.6655	4.09532
21.6939	3.80428
21.7215	3.86036
21.7495	4.03489
21.7775	3.69561
21.8045	4.07278
21.8325	21.2673
21.9235	22.9369
21.9519	23.2852
21.9799	22.9265
22.0079	22.9329
22.0369	22.0879
22.065	21.952
22.093	21.2652
22.121	20.9962
22.149	21.0032
22.177	20.472
22.2061	20.7846
22.2351	20.1925
22.2631	20.3201
22.2911	20.273
22.3191	20.0975
22.3481	20.4403
22.3761	19.9543
22.4041	20.4231
22.4321	20.1083
22.4601	19.9887
22.4881	20.2866
22.5161	19.8284
22.5443	20.1789
22.5723	19.8873
22.6003	19.8274
22.6283	20.0407
22.6573	19.5365
22.6843	19.926
22.7133	19.6004
22.7413	19.7526
22.7704	19.7987
22.7983	19.5605
22.8274	19.9486
22.8564	19.0017
22.8844	18.2465
22.9124	15.6054
22.9404	10.471
22.9694	5.16988
22.9974	2.70155
23.0254	2.28179
23.0534	1.99105
23.0814	2.37461
23.1104	2.65424
23.1384	2.73293
23.1665	3.24688
23.1945	3.00722
23.2225	3.35478
23.2505	3.40216
23.2785	3.25407
23.3075	3.62305
23.3355	3.32224
23.3635	3.71031
23.3925	3.50008
23.4205	3.56102
23.4486	3.78013
23.4776	3.49233
23.5046	3.86573
23.5336	3.55302
23.5616	3.71677
23.5896	3.7692
23.6186	3.5769
23.6467	3.90096
23.6747	3.52715
23.7037	3.87864
23.7317	3.63796
23.7607	3.73634
23.7887	3.84876
23.8167	21.6011
23.9076	23.0041
23.9356	22.7335
23.9646	22.9688
23.9916	22.3379
24.0226	22.1248
24.0531	21.5502
24.0811	21.4174
24.1091	21.146
24.1381	20.6536
24.1661	20.9113
24.1961	20.3007
24.2242	20.5429
24.2532	20.0456
24.2812	20.1852
24.3092	20.1048
24.3382	19.9217
24.3672	20.2212
24.3962	19.7712
24.4242	20.1169
24.4542	19.5797
24.4832	19.9398
24.5112	19.6755
24.5392	19.5982
24.5682	19.7384
24.5962	19.412
24.6252	19.7961
24.6532	19.3174
24.6812	19.5728
24.7103	19.6349
24.7383	19.4048
24.7663	19.7571
24.7953	19.3758
24.8243	19.6622
24.8523	18.4089
24.8813	16.7415
24.9093	12.4711
24.9383	6.32857
24.9663	3.67772
24.9963	2.27624
25.0243	2.56683
25.0533	2.46472
25.0823	3.02231
25.1104	3.125
25.1383	3.24456
25.1675	3.60341
25.1965	3.35313
25.2245	3.8325
25.2525	3.55777
25.2815	3.83295
25.3096	3.80711
25.3376	3.68317
25.3656	4.01302
25.3956	3.65015
25.4246	4.10117
25.4526	3.74833
25.4816	4.01138
25.5106	3.92999
25.5396	3.93969
25.5676	4.0573
25.5966	3.76048
25.6246	4.15713
25.6539	3.76004
25.6839	4.13627
25.7119	3.8149
25.7409	4.00478
25.7699	3.97804
25.7979	3.95348
25.8269	10.508
25.8549	17.9978
25.8839	21.8322
25.9139	22.4988
25.942	23.0282
25.971	22.4728
25.999	22.1305
26.028	21.9957
26.057	21.5408
26.085	21.6746
26.114	21.0195
26.142	21.2858
26.1714	20.8378
26.2004	20.8958
26.2294	20.6781
26.2585	20.5228
26.2865	20.7269
26.3155	20.2232
26.3445	20.6367
26.3725	20.1409
26.4016	20.4098
26.4306	20.064
26.4596	20.1411
26.4886	20.2149
26.5176	19.8575
26.5456	20.1211
26.5746	19.6068
26.6036	19.9678
26.6316	19.5192
26.6606	19.7652
26.6906	19.5086
26.7196	19.4369
26.7486	19.4548
26.7776	19.2816
26.8066	19.5598
26.8356	18.8046
26.8647	18.1244
26.8937	15.2037
26.9217	2.90467
27.0132	2.08995
27.0443	2.7161
27.0733	2.57471
27.1023	3.18087
27.1303	3.1641
27.1593	3.3536
27.1893	3.52898
27.2173	3.52806
27.2463	3.79366
27.2753	3.52202
27.3043	3.99329
27.3333	3.61903
27.3616	3.98867
27.3916	3.68838
27.4206	4.00211
27.4496	3.80271
27.4786	3.89557
27.5076	4.00688
27.5366	3.78144
27.5656	4.10784
27.5946	3.7419
27.6226	4.15489
27.6516	3.78982
27.6806	4.04668
27.7096	3.89868
27.7383	3.95232
27.7673	4.05924
27.7953	3.79791
27.8243	20.8602
27.9156	22.1195
27.9446	22.8485
27.9746	22.1211
28.0037	22.195
28.0327	21.5385
28.0617	21.7324
28.0897	21.1776
28.1187	21.1267
28.1487	20.9789
28.1777	20.7339
28.2065	20.7625
28.2355	20.3566
28.2645	20.5848
28.2935	19.9043
28.3225	20.2517
28.3515	19.7955
28.3805	19.9988
28.4095	19.6975
28.4385	19.683
28.4675	19.7306
28.4965	19.3884
28.5246	19.7518
28.5545	19.3782
28.5826	19.8096
28.6126	19.2791
28.6416	19.7267
28.6706	19.4855
28.6986	19.5844
28.7276	19.5173
28.7576	19.3984
28.7876	19.4622
28.8166	19.1182
28.8456	19.0286
28.8756	17.4157
28.9056	14.8171
28.9346	2.26887
29.0248	1.91717
29.0548	1.8719
29.0838	2.43922
29.1128	2.27081
29.1428	2.87848
29.1708	2.68623
29.1998	3.08874
29.2288	3.01156
29.2588	3.13475
29.2878	3.23529
29.3168	3.18246
29.3469	3.34252
29.3759	3.1762
29.4059	3.48856
29.4359	3.23008
29.4649	3.51307
29.4951	3.28
29.5241	3.60848
29.5531	3.22794
29.5831	3.66003
29.6121	3.279
29.6411	3.6469
29.6701	3.37334
29.6991	3.58661
29.7281	3.51448
29.7571	3.51537
29.7861	3.68674
29.8151	5.89768
29.8441	14.9512
29.8752	20.0017
29.9042	22.2882
29.9344	22.2733
29.9634	22.4559
29.9924	21.7035
30.0226	21.9569
30.0516	21.2226
30.0846	21.4631
30.1136	20.9353
30.1426	21.2485
30.1716	20.5572
30.2016	20.8529
30.2306	20.3696
30.2596	20.442
30.2886	20.1466
30.3176	20.1553
30.3476	20.0752
30.3766	19.7891
30.4056	19.8279
30.4347	19.497
30.4647	19.7268
30.4937	19.2291
30.5237	19.5686
30.5527	19.0864
30.5827	19.4665
30.6117	18.975
30.6407	19.4217
30.6707	18.9008
30.6997	19.2567
30.7297	18.9974
30.7597	19.3483
30.7887	19.1962
30.8187	19.2742
30.8487	18.7259
30.8777	17.4253
30.9078	14.3885
30.9368	2.47174
31.0273	1.96614
31.0563	2.19517
31.0863	2.56446
31.1164	2.65374
31.1454	3.07169
31.1754	3.02762
31.2054	3.29997
31.2344	3.15765
31.2654	3.49431
31.2954	3.3293
31.3244	3.60106
31.3544	3.34383
31.3834	3.73615
31.4124	3.36477
31.4424	3.76591
31.4714	3.39574
31.5014	3.81384
31.5308	3.45948
31.5605	3.81554
31.5895	3.54305
31.6195	3.78844
31.6495	3.55155
31.6785	3.81362
31.7085	3.6678
31.7375	3.7621
31.7675	3.74399
31.7965	3.74627
31.8275	21.3051
31.9187	22.5343
31.9487	22.2767
31.9777	22.1176
32.0087	21.678
32.0387	21.5466
32.0687	21.0797
32.0987	21.131
32.1277	20.8792
32.1587	20.7841
32.1878	20.6118
32.2178	20.5469
32.2468	20.3461
32.2768	20.1317
32.3058	20.2194
32.3358	19.9142
32.3655	20.0461
32.3945	19.7342
32.4245	19.9982
32.4545	19.5485
32.4856	19.6458
32.5157	19.5383
32.5457	19.6826
32.5757	19.3349
32.6047	19.5534
32.6347	19.2641
32.6637	19.4606
32.6937	19.0576
32.7247	19.417
32.7535	18.9808
32.7844	19.2231
32.8155	18.9045
32.846	18.5217
32.8755	16.7902
32.906	13.5772
32.9361	1.97666
33.0261	1.64647
33.0561	1.89902
33.0857	2.19903
33.1167	2.37153
33.1471	2.61356
33.1776	2.80932
33.209	2.72648
33.239	3.11404
33.2691	2.96509
33.2995	3.29777
33.3291	3.02323
33.3596	3.40193
33.39	3.06278
33.421	3.47267
33.4505	3.15036
33.4805	3.57671
33.5111	3.20513
33.5414	3.65735
33.5719	3.29716
33.6019	3.72136
33.6324	3.35617
33.6624	3.78616
33.6924	3.40488
33.7235	3.76943
33.7545	3.54589
33.7855	3.7538
33.8155	4.72039
33.8455	13.6289
33.8755	19.7799
33.9075	21.8576
33.9375	22.4084
33.9675	22.0829
34.0266	21.1186
34.0568	21.1551
34.1168	20.5283
34.1435	20.504
34.2025	20.1561
34.2287	19.6147
34.2827	19.5093
34.3087	18.9785
34.3387	19.1056
34.3713	18.5607
34.4018	18.9859
34.4318	18.3422
34.4608	18.6904
34.4918	18.1636
34.5218	18.5016
34.5518	17.8795
34.5818	18.301
34.6118	17.8314
34.6428	18.1677
34.6728	17.6293
34.7028	18.026
34.7328	17.5589
34.7629	17.8826
34.7929	17.4263
34.8229	17.5891
34.8529	16.4151
34.8819	15.1352
34.9119	10.8389
34.9419	5.02464
34.9719	1.37109
35.0019	0.74564
35.0319	0.28904
35.0629	0.91921
35.094	0.8858
35.123	1.4865
35.153	1.32809
35.183	1.80457
35.213	1.62867
35.243	2.05594
35.273	1.79554
35.303	2.2333
35.3331	1.99175
35.3631	2.41155
35.3931	2.16622
35.4231	2.51709
35.4531	2.30425
35.4831	2.70435
35.5131	2.40998
35.5425	2.84106
35.5725	2.52963
35.6036	2.87191
35.6346	2.65638
35.6646	2.95513
35.6946	2.7492
35.7246	2.99145
35.7546	2.8713
35.7846	3.02956
35.8156	4.00113
35.8447	12.5747
35.8747	18.7264
35.9057	20.9351
35.9347	21.3264
35.9657	21.2046
35.9957	20.7345
36.0267	20.4735
36.0567	20.3404
36.0867	20.0525
36.1167	19.9298
36.1467	19.73
36.1767	19.7223
36.2067	19.3862
36.2377	19.3649
36.2678	19.0757
36.2978	19.1065
36.3278	18.7932
36.3578	18.9123
36.3878	18.5849
36.4188	18.6844
36.4488	18.3016
36.4788	18.6124
36.5088	18.1688
36.5406	18.4913
36.5706	17.9731
36.6006	18.3589
36.6316	17.7646
36.6616	18.1951
36.6916	17.7997
36.7226	18.1641
36.7527	17.6908
36.7837	18.0654
36.8137	17.771
36.8447	17.403
36.8747	15.9151
36.9057	12.8305
36.9367	1.24745
37.0264	0.73273
37.0585	1.21979
37.0885	1.22134
37.1195	1.81894
37.1505	1.59702
37.1805	2.15252
37.2115	1.89166
37.2415	2.35778
37.2725	2.04349
37.3025	2.48003
37.3335	2.21395
37.3645	2.4808
37.3956	2.43128
37.4266	2.50763
37.4566	2.56326
37.4876	2.51654
37.5166	2.69557
37.5476	2.5113
37.5788	2.85796
37.6098	2.518
37.6398	2.93148
37.6718	2.55252
37.7028	2.91586
37.7338	2.65892
37.7638	2.91088
37.7948	2.75068
37.8258	6.0584
37.8558	14.8972
37.8868	19.5279
37.9168	21.2564
37.9478	21.3039
37.9778	21.1651
38.0088	20.4436
38.0399	20.5791
38.0709	19.9711
38.1009	20.2583
38.1319	19.688
38.1639	19.9706
38.1949	19.6133
38.2259	19.7128
38.2581	19.7231
38.2891	19.2564
38.3191	19.5398
38.3501	19.077
38.3821	19.4186
38.4132	18.9815
38.4432	19.3867
38.4742	19.1261
38.5052	19.1778
38.5362	19.0098
38.5662	19.0192
38.5972	19.0464
38.6282	18.756
38.6593	19.0812
38.6904	18.6012
38.7204	18.9873
38.7514	18.476
38.7824	18.91
38.8134	18.4047
38.8444	18.5956
38.8744	17.653
38.9044	15.9503
38.9354	11.557
38.9664	5.27515
38.9974	2.3527
39.0284	1.15328
39.0584	1.46832
39.0914	1.40783
39.1224	2.02547
39.1534	1.94216
39.1845	2.35911
39.2155	2.35387
39.2465	2.44961
39.2775	2.61836
39.3086	2.49006
39.3386	2.84036
39.3696	2.512
39.4006	2.95865
39.4316	2.5649
39.4626	2.95614
39.4936	2.68533
39.5246	2.92878
39.5546	2.76873
39.5856	2.83341
39.6166	2.90044
39.6476	2.70438
39.6796	3.00209
39.7097	2.65935
39.7416	3.05919
39.7717	2.65869
39.8027	3.06203
39.8347	20.7938
39.9265	21.4227
39.9575	21.3029
39.9885	20.7098
40.0185	20.7364
40.0505	20.0195
40.0845	20.1024
40.1165	19.9496
40.1476	19.7575
40.1786	19.8284
40.2096	19.4636
40.2406	19.7894
40.2716	19.2301
40.3026	19.6199
40.3336	19.2763
40.3646	19.3883
40.3956	19.1405
40.4267	19.1611
40.4577	19.3009
40.4877	19.0948
40.5177	19.3012
40.5497	18.9556
40.5797	19.2587
40.6108	18.6894
40.6407	19.1566
40.6728	18.6499
40.7038	18.9404
40.7348	18.762
40.7668	18.8348
40.7978	18.8533
40.8288	18.5208
40.8588	18.2354
40.8898	15.9897
40.9208	12.1616
40.9518	5.33061
40.9839	2.61429
41.0149	1.39791
41.0459	1.55707
41.0769	1.81632
41.1079	1.91814
41.1399	2.46893
41.1711	2.29876
41.2022	2.7952
41.2341	2.60515
41.2652	2.86692
41.2962	2.86376
41.3272	2.74971
41.3592	3.10082
41.3902	2.79925
41.4202	3.22012
41.4512	2.86128
41.4822	3.31901
41.5142	3.02872
41.5442	3.27348
41.5762	3.18714
41.6072	3.18934
41.6382	3.40242
41.6703	3.11166
41.7013	3.55703
41.7333	3.20247
41.7643	3.49113
41.7953	3.4236
41.8273	4.27298
41.8583	13.2449
41.8893	19.3056
41.9213	21.8794
41.9523	21.9094
41.9843	22.093
42.0143	21.6158
42.0453	21.4032
42.0763	21.1784
42.1073	20.9289
42.139	20.8829
42.1701	20.3346
42.2011	20.6503
42.2321	20.0852
42.2624	20.3432
42.2944	19.8926
42.3254	20.0214
42.3574	19.8864
42.3884	19.5111
42.4195	19.8126
42.4515	19.288
42.4825	19.6579
42.5135	19.192
42.5455	19.4189
42.5775	19.3254
42.6085	19.0476
42.6415	19.3688
42.6735	18.8148
42.7045	19.1239
42.7375	19.1061
42.7695	18.7424
42.8015	19.1262
42.8336	18.5514
42.8646	17.9809
42.8966	15.6668
42.9276	10.6743
42.9596	4.72154
42.9906	2.15194
43.0216	1.79279
43.0526	1.62361
43.0836	2.18971
43.1146	2.22603
43.1466	2.55542
43.1786	2.84551
43.2106	2.64701
43.2426	3.10952
43.2737	2.86188
43.3057	3.12671
43.3367	3.10507
43.3677	3.04432
43.3997	3.3295
43.4317	2.98274
43.4627	3.40256
43.4947	3.11265
43.5257	3.29627
43.5567	3.2847
43.5877	3.23123
43.6187	3.43924
43.6499	3.14244
43.6819	3.54345
43.7129	3.14313
43.7439	3.4948
43.7749	3.25952
43.807	3.35822
43.839	21.4717
43.929	22.0168
43.961	22.3305
43.992	21.4657
44.0246	21.3421
44.0566	20.8936
44.0886	20.7279
44.1196	20.8222
44.1506	20.2822
44.1826	20.6762
44.2146	20.1686
44.2456	20.2484
44.2776	20.2144
44.3096	19.98
44.3406	20.2818
44.3726	19.7766
44.4049	20.1169
44.4359	19.7504
44.4679	19.6487
44.4999	19.9475
44.5309	19.4593
44.5629	19.8042
44.5939	19.3859
44.6259	19.5995
44.6569	19.5265
44.6889	19.3182
44.7199	19.5994
44.752	19.0663
44.783	19.4539
44.815	19.1341
44.847	18.7453
44.879	17.4747
44.911	13.8912
44.942	1.90293
45.0328	1.43621
45.0648	2.03144
45.0968	2.1555
45.1298	2.32776
45.1618	2.86567
45.1928	2.62139
45.2248	3.02408
45.2569	2.97212
45.2889	2.96578
45.3199	3.26818
45.3519	2.94486
45.3829	3.33864
45.4149	3.05447
45.4469	3.23795
45.4779	3.30829
45.5099	3.05669
45.5429	3.491
45.5749	3.18459
45.6069	3.37053
45.6379	3.43592
45.6689	3.28416
45.7009	3.60159
45.733	3.23952
45.765	3.56118
45.796	3.41158
45.828	5.22344
45.86	14.976
45.892	19.9326
45.923	22.1972
45.955	22.1643
45.987	22.0397
46.018	21.6839
46.05	21.1158
46.082	21.3312
46.113	20.6419
46.145	20.745
46.1771	20.5481
46.2091	20.2294
46.2411	20.4872
46.2731	20.0196
46.3051	20.2105
46.3371	19.9939
46.3691	19.8367
46.4001	20.0387
46.4321	19.4182
46.4652	19.7094
46.4972	19.4545
46.5282	19.2767
46.5602	19.5195
46.5932	19.1162
46.6242	19.4723
46.6562	19.2696
46.6882	19.3279
46.7202	19.5375
46.7512	19.0999
46.7832	19.6091
46.8152	19.2728
46.8473	18.9533
46.8793	17.9053
46.9113	14.3769
46.9443	2.21238
47.0349	1.82819
47.0669	2.30795
47.0989	2.72507
47.1321	2.73474
47.1639	3.28112
47.1969	3.22598
47.2289	3.22992
47.2619	3.64122
47.2951	3.36912
47.3271	3.55086
47.3601	3.76028
47.3921	3.41113
47.4241	3.79452
47.4561	3.61504
47.4881	3.57576
47.5202	3.9027
47.5522	3.52174
47.5842	3.88567
47.6162	3.72913
47.6482	3.72257
47.6802	3.99551
47.7132	3.62738
47.7452	3.98142
47.7762	3.81963
47.8102	3.72934
47.8412	21.9552
47.9329	22.6121
47.965	22.9817
47.997	22.4497
48.029	22.0082
48.062	22.1351
48.094	21.4406
48.128	21.329
48.16	21.3541
48.192	20.7626
48.225	20.9883
48.258	20.7707
48.291	20.3154
48.323	20.5816
48.3561	20.1913
48.388	20.0625
48.4201	20.2657
48.4531	19.729
48.4851	19.9259
48.5171	19.6657
48.5491	19.5248
48.5811	19.8501
48.6131	19.3406
48.6461	19.642
48.6781	19.7084
48.7101	19.344
48.7431	19.7498
48.7751	19.3757
48.8072	19.5012
48.8392	19.4153
48.8712	18.1077
48.9042	15.9565
48.9372	2.61469
49.0274	1.93437
49.0604	2.31786
49.0934	2.26472
49.1254	2.81277
49.1584	2.99407
49.1914	2.91036
49.2234	3.37695
49.2555	3.23094
49.2885	3.32352
49.3215	3.64577
49.3535	3.29944
49.3855	3.61023
49.4185	3.63381
49.4505	3.4321
49.4835	3.82323
49.5155	3.56172
49.5485	3.66557
49.5805	3.93635
49.6125	3.59565
49.6455	3.90265
49.6775	3.85946
49.7106	3.68464
49.7426	4.07478
49.7746	3.75066
49.8066	3.98442
49.8396	21.9624
49.9314	22.5944
49.9634	23.024
49.9964	22.452
50.0284	22.1293
50.0614	22.1178
50.1136	21.3313
50.1396	21.5799
50.1726	20.9342
50.2046	21.1418
50.2376	20.9136
50.2696	20.5418
50.3016	20.8014
50.3336	20.3283
50.3666	20.3598
50.3986	20.2443
50.4306	19.8396
50.4636	20.156
50.4956	19.6678
50.5277	19.7141
50.5597	19.7724
50.5917	19.2424
50.6257	19.5592
50.6577	19.3956
50.6907	19.0487
50.7227	19.3815
50.7547	18.9997
50.7892	18.947
50.8217	19.2642
50.8547	18.3877
50.8867	17.1138
50.9188	13.5892
50.9508	1.50887
51.0418	1.60705
51.0738	1.56347
51.1068	1.99064
51.1398	2.42608
51.1728	2.24825
51.2058	2.67077
51.2378	2.6947
51.2708	2.59296
51.3028	3.01774
51.3359	2.79617
51.3699	2.75637
51.4019	3.15622
51.4349	2.84982
51.4669	3.04171
51.4999	3.22091
51.5329	2.87528
51.5649	3.251
51.5979	3.15936
51.6299	2.98005
51.6629	3.35944
51.6959	3.10143
51.729	3.06926
51.762	3.42999
51.795	3.13541
51.827	4.22726
51.8601	14.0425
51.8934	19.8123
51.9254	22.0644
51.9594	22.3219
51.9935	21.7022
52.0265	21.658
52.0595	21.3929
52.0925	20.8697
52.1245	21.1477
52.1575	20.8918
52.1905	20.6219
52.2225	20.9622
52.2555	20.3977
52.2875	20.3779
52.3205	20.5791
52.3525	20.0188
52.3856	20.325
52.4186	20.3193
52.4516	19.9129
52.4836	20.2593
52.5166	20.0006
52.5496	19.9276
52.5826	20.1827
52.6146	19.7835
52.6476	19.9014
52.6796	20.032
52.7126	19.6048
52.7456	20.0001
52.7776	19.8718
52.8106	19.6064
52.8436	19.8873
52.8767	18.6627
52.9097	16.1799
52.9427	10.8911
52.9767	4.42279
53.0087	2.51812
53.0427	2.24616
53.0766	2.22957
53.1086	2.42271
53.1426	2.97997
53.1756	2.85642
53.2086	3.06888
53.2406	3.37687
53.274	3.13159
53.307	3.34163
53.34	3.4985
53.373	3.20712
53.406	3.50876
53.438	3.49313
53.471	3.26292
53.522	3.67949
53.548	3.47791
53.581	3.69708
53.6151	3.36932
53.6481	3.47591
53.6811	3.72022
53.7141	3.32816
53.7466	3.55439
53.7796	3.66493
53.8126	3.32447
53.8456	21.1917
53.9376	22.4679
53.9706	22.4391
54.0026	22.5085
54.0366	21.8475
54.0706	21.4851
54.1026	21.5998
54.1366	20.913
54.1706	20.6469
54.2036	20.9229
54.2366	20.4606
54.2696	20.2847
54.3026	20.5675
54.3357	20.1202
54.3698	19.9459
54.4028	20.3185
54.4358	19.856
54.4688	19.7764
54.5028	20.1038
54.5358	19.6811
54.5688	19.5876
54.6018	19.9844
54.6359	19.5556
54.6689	19.4662
54.7019	19.8146
54.7359	19.4071
54.7689	19.3536
54.8019	19.7283
54.835	19.3712
54.868	19.0354
54.901	17.8645
54.934	13.9895
54.967	1.91547
55.0565	1.85411
55.0905	1.97828
55.1235	2.62101
55.1566	2.67616
55.1896	2.74196
55.2236	3.21111
55.2576	3.12439
55.2906	2.99846
55.3236	3.42479
55.3577	3.29817
55.3907	3.11036
55.4247	3.47622
55.4587	3.45615
55.4917	3.16015
55.5258	3.49173
55.5588	3.445
55.5918	3.1768
55.6248	3.53076
55.6588	3.47537
55.6918	3.18367
55.7248	3.51958
55.7588	3.4652
55.7918	3.2268
55.8258	3.63977
55.876	16.3852
55.903	20.556
55.9364	22.1778
55.9704	22.2431
56.0034	22.2768
56.0364	21.6667
56.0704	21.323
56.1034	21.4416
56.1364	21.0452
56.1704	20.796
56.2204	20.9133
56.2465	20.6639
56.2805	20.746
56.3135	20.1622
56.3475	20.2764
56.3815	20.3697
56.4145	19.8441
56.4484	19.7331
56.4834	20.0236
56.5174	19.6967
56.5515	19.3191
56.5845	19.7278
56.6175	19.4823
56.6515	19.045
56.6855	19.3982
56.7185	19.3627
56.7525	18.9236
56.7855	19.3261
56.8185	19.2728
56.8515	18.6853
56.8845	17.9639
56.9185	15.1284
56.9515	1.97589
57.0426	1.80236
57.0756	1.75163
57.1096	1.97786
57.1426	2.57227
57.1766	2.53708
57.2106	2.56886
57.2436	3.02122
57.2776	2.94426
57.3106	2.79394
57.3611	3.24092
57.3876	3.05158
57.4216	3.2947
57.4546	2.99493
57.4886	3.00097
57.5216	3.36793
57.5727	2.96776
57.5976	3.21614
57.6326	3.0085
57.6656	3.29923
57.6996	3.35949
57.7496	3.07694
57.7753	3.15472
57.8263	3.25847
57.8533	3.52106
57.9033	17.5708
57.9303	20.5735
57.9643	22.422
57.9973	22.1443
58.0313	21.5341
58.0643	21.4355
58.0984	21.0137
58.1324	20.4814
58.1664	20.6088
58.1994	20.489
58.2334	19.9236
58.2674	20.0392
58.3004	20.0091
58.3344	19.5442
58.3684	19.5294
58.4024	19.7117
58.4364	19.3439
58.4694	19.3012
58.5034	19.5388
58.5374	19.3421
58.5715	19.0328
58.6045	19.3277
58.6385	19.2321
58.6725	18.9585
58.7055	19.2693
58.7395	19.2866
58.7725	18.9125
58.8065	19.1839
58.8395	19.2389
58.8735	18.5439
58.9065	17.5049
58.9405	14.3624
58.9736	1.80856
59.0645	1.59137
59.1146	1.7537
59.1406	2.25444
59.1916	2.22455
59.2184	2.61528
59.2524	2.44575
59.2854	2.79141
59.3194	2.91262
59.3524	2.651
59.3864	2.92283
59.4365	2.88512
59.4625	3.12791
59.5125	2.75555
59.5385	3.00195
59.5715	2.76005
59.6055	3.06428
59.6385	3.10765
59.6725	2.80799
59.7065	3.08044
59.7395	3.17764
59.7735	2.85067
59.8065	3.04123
59.8405	3.91583
59.8745	13.2288
59.9085	19.6855
59.9425	21.9035
59.9765	21.7898
60.0265	21.3225
60.0525	20.7718
60.1075	20.4932
60.1334	20.2283
60.1683	20.0789
60.2014	20.2575
60.2354	19.8629
60.2694	19.6993
60.3034	19.9748
60.3374	19.8503
60.3714	19.5348
60.4054	19.8247
[truncated: 8,125 more rows]

## Sheet: Fig. 4l1
x-axis-Time (s)	y-axis-Output Voltage (V)
50.0284	22.1293
50.0614	22.1178
50.1136	21.3313
50.1396	21.5799
50.1726	20.9342
50.2046	21.1418
50.2376	20.9136
50.2696	20.5418
50.3016	20.8014
50.3336	20.3283
50.3666	20.3598
50.3986	20.2443
50.4306	19.8396
50.4636	20.156
50.4956	19.6678
50.5277	19.7141
50.5597	19.7724
50.5917	19.2424
50.6257	19.5592
50.6577	19.3956
50.6907	19.0487
50.7227	19.3815
50.7547	18.9997
50.7892	18.947
50.8217	19.2642
50.8547	18.3877
50.8867	17.1138
50.9188	13.5892
50.9508	1.50887
51.0418	1.60705
51.0738	1.56347
51.1068	1.99064
51.1398	2.42608
51.1728	2.24825
51.2058	2.67077
51.2378	2.6947
51.2708	2.59296
51.3028	3.01774
51.3359	2.79617
51.3699	2.75637
51.4019	3.15622
51.4349	2.84982
51.4669	3.04171
51.4999	3.22091
51.5329	2.87528
51.5649	3.251
51.5979	3.15936
51.6299	2.98005
51.6629	3.35944
51.6959	3.10143
51.729	3.06926
51.762	3.42999
51.795	3.13541
51.827	4.22726
51.8601	14.0425
51.8934	19.8123
51.9254	22.0644
51.9594	22.3219
51.9935	21.7022
52.0265	21.658
52.0595	21.3929
52.0925	20.8697
52.1245	21.1477
52.1575	20.8918
52.1905	20.6219
52.2225	20.9622
52.2555	20.3977
52.2875	20.3779
52.3205	20.5791
52.3525	20.0188
52.3856	20.325
52.4186	20.3193
52.4516	19.9129
52.4836	20.2593
52.5166	20.0006
52.5496	19.9276
52.5826	20.1827
52.6146	19.7835
52.6476	19.9014
52.6796	20.032
52.7126	19.6048
52.7456	20.0001
52.7776	19.8718
52.8106	19.6064
52.8436	19.8873
52.8767	18.6627
52.9097	16.1799
52.9427	10.8911
52.9767	4.42279
53.0087	2.51812
53.0427	2.24616
53.0766	2.22957
53.1086	2.42271
53.1426	2.97997
53.1756	2.85642
53.2086	3.06888
53.2406	3.37687
53.274	3.13159
53.307	3.34163
53.34	3.4985
53.373	3.20712
53.406	3.50876
53.438	3.49313
53.471	3.26292
53.522	3.67949
53.548	3.47791
53.581	3.69708
53.6151	3.36932
53.6481	3.47591
53.6811	3.72022
53.7141	3.32816
53.7466	3.55439
53.7796	3.66493
53.8126	3.32447
53.8456	21.1917
53.9376	22.4679
53.9706	22.4391
54.0026	22.5085
54.0366	21.8475
54.0706	21.4851
54.1026	21.5998
54.1366	20.913
54.1706	20.6469
54.2036	20.9229
54.2366	20.4606
54.2696	20.2847
54.3026	20.5675
54.3357	20.1202
54.3698	19.9459
54.4028	20.3185
54.4358	19.856
54.4688	19.7764
54.5028	20.1038
54.5358	19.6811
54.5688	19.5876
54.6018	19.9844
54.6359	19.5556
54.6689	19.4662
54.7019	19.8146
54.7359	19.4071
54.7689	19.3536
54.8019	19.7283
54.835	19.3712
54.868	19.0354
54.901	17.8645
54.934	13.9895
54.967	1.91547
55.0565	1.85411
55.0905	1.97828
55.1235	2.62101
55.1566	2.67616
55.1896	2.74196
55.2236	3.21111
55.2576	3.12439
55.2906	2.99846
55.3236	3.42479
55.3577	3.29817
55.3907	3.11036
55.4247	3.47622
55.4587	3.45615
55.4917	3.16015
55.5258	3.49173
55.5588	3.445
55.5918	3.1768
55.6248	3.53076
55.6588	3.47537
55.6918	3.18367
55.7248	3.51958
55.7588	3.4652
55.7918	3.2268
55.8258	3.63977
55.876	16.3852
55.903	20.556
55.9364	22.1778
55.9704	22.2431
56.0034	22.2768
56.0364	21.6667
56.0704	21.323
56.1034	21.4416
56.1364	21.0452
56.1704	20.796
56.2204	20.9133
56.2465	20.6639
56.2805	20.746
56.3135	20.1622
56.3475	20.2764
56.3815	20.3697
56.4145	19.8441
56.4484	19.7331
56.4834	20.0236
56.5174	19.6967
56.5515	19.3191
56.5845	19.7278
56.6175	19.4823
56.6515	19.045
56.6855	19.3982
56.7185	19.3627
56.7525	18.9236
56.7855	19.3261
56.8185	19.2728
56.8515	18.6853
56.8845	17.9639
56.9185	15.1284
56.9515	1.97589
57.0426	1.80236
57.0756	1.75163
57.1096	1.97786
57.1426	2.57227
57.1766	2.53708
57.2106	2.56886
57.2436	3.02122
57.2776	2.94426
57.3106	2.79394
57.3611	3.24092
57.3876	3.05158
57.4216	3.2947
57.4546	2.99493
57.4886	3.00097
57.5216	3.36793
57.5727	2.96776
57.5976	3.21614
57.6326	3.0085
57.6656	3.29923
57.6996	3.35949
57.7496	3.07694
57.7753	3.15472
57.8263	3.25847
57.8533	3.52106
57.9033	17.5708
57.9303	20.5735
57.9643	22.422
57.9973	22.1443
58.0313	21.5341
58.0643	21.4355
58.0984	21.0137
58.1324	20.4814
58.1664	20.6088
58.1994	20.489
58.2334	19.9236
58.2674	20.0392
58.3004	20.0091
58.3344	19.5442
58.3684	19.5294
58.4024	19.7117
58.4364	19.3439
58.4694	19.3012
58.5034	19.5388
58.5374	19.3421
58.5715	19.0328
58.6045	19.3277
58.6385	19.2321
58.6725	18.9585
58.7055	19.2693
58.7395	19.2866
58.7725	18.9125
58.8065	19.1839
58.8395	19.2389
58.8735	18.5439
58.9065	17.5049
58.9405	14.3624
58.9736	1.80856
59.0645	1.59137
59.1146	1.7537
59.1406	2.25444
59.1916	2.22455
59.2184	2.61528
59.2524	2.44575
59.2854	2.79141
59.3194	2.91262
59.3524	2.651
59.3864	2.92283
59.4365	2.88512
59.4625	3.12791
59.5125	2.75555
59.5385	3.00195
59.5715	2.76005
59.6055	3.06428
59.6385	3.10765
59.6725	2.80799
59.7065	3.08044
59.7395	3.17764
59.7735	2.85067
59.8065	3.04123
59.8405	3.91583
59.8745	13.2288
59.9085	19.6855
59.9425	21.9035
59.9765	21.7898
60.0265	21.3225
60.0525	20.7718
60.1075	20.4932
60.1334	20.2283
60.1683	20.0789
60.2014	20.2575
60.2354	19.8629
60.2694	19.6993
60.3034	19.9748
60.3374	19.8503
60.3714	19.5348
60.4054	19.8247
60.4384	19.9509
60.4724	19.5551
60.5064	19.6961
60.5404	19.8961
60.5744	19.4824
60.6086	19.4496
60.6436	19.7954
60.6766	19.6049
60.7106	19.3115
60.7446	19.7911
60.7777	19.7639
60.8117	19.3244
60.8457	19.5471
60.8797	18.662
60.9137	15.7066
60.9477	2.2077
61.0383	1.99919
61.0733	1.9491
61.1064	2.39052
61.1404	2.84456
61.1744	2.72882
61.2084	2.8872
61.2424	3.28054
61.2766	3.21531
61.3106	3.0688
61.3446	3.41231
61.3786	3.50338
61.4126	3.21278
61.4626	3.63673
61.489	3.35565
61.523	3.70929
61.557	3.58625
61.59	3.39952
61.624	3.73947
61.6581	3.71384
61.6921	3.45467
61.7261	3.68385
61.7601	3.87421
61.7941	3.58454
61.8281	3.78712
61.8621	12.6346
61.8951	19.8165
61.9301	22.2162
61.9801	22.9369
62.0062	22.5355
62.0402	22.3425
62.0742	21.6757
62.1082	21.5097
62.1412	21.6124
62.1752	21.098
62.2272	20.8478
62.2533	20.5361
62.2873	20.4994
62.3213	20.7321
62.3553	20.2219
62.3893	19.9589
62.4233	20.3148
62.4563	19.9782
62.4903	19.5502
62.5413	19.974
62.5685	19.5888
62.6195	19.9285
62.6466	19.7089
62.6806	19.9002
62.7326	19.4785
62.7583	19.8164
62.7933	19.3595
62.8263	19.5094
62.8613	19.5294
62.8963	18.0791
62.9303	14.9367
62.9813	5.49206
63.0073	2.98492
63.0587	2.08569
63.0848	2.23091
63.1358	2.56847
63.1613	3.02388
63.2133	2.91647
63.2393	3.33809
63.2734	3.08921
63.3073	3.16323
63.3594	3.50248
63.3854	3.39775
63.4364	3.37536
63.462	3.59309
63.496	3.44024
63.548	3.36399
63.574	3.39477
63.6081	3.38077
63.6601	3.7096
63.6846	3.6271
63.7366	3.60057
63.7626	3.75422
63.8136	3.49255
63.8406	5.34518
63.8746	15.4616
63.9267	21.8009
63.9537	22.2864
63.9877	22.2011
64.0217	22.0614
64.0728	21.1105
64.0994	21.2706
64.1334	20.5321
64.1854	20.351
64.2126	19.9968
64.2646	19.9289
64.2906	19.4834
64.3256	19.5359
64.3586	19.4727
64.4106	18.9472
64.4366	19.0639
64.4876	18.7862
64.5131	18.7333
64.5652	18.7923
64.5922	18.5484
64.6452	18.8478
64.6712	18.5014
64.7052	18.8116
64.7562	18.7553
64.7822	18.8839
64.8342	18.6237
64.8602	18.8721
64.8952	17.9746
64.9302	15.8589
64.9822	1.57313
65.0736	1.30121
65.1256	1.86563
65.1512	1.91966
65.1852	2.39537
65.2372	2.73681
65.2632	2.86572
65.3143	2.7622
65.3396	3.11183
65.3906	2.7928
65.4166	3.09604
65.4506	2.90224
65.5016	3.34233
65.5276	3.09431
65.5786	3.471
65.6046	3.38989
65.6386	3.57959
65.6736	3.34541
65.7246	3.46807
65.7514	3.30219
65.8024	3.6946
65.8276	3.45076
65.8796	16.7057
65.9056	20.4296
65.9406	22.4554
65.9906	21.9718
66.0166	21.9918
66.0676	21.3222
66.0947	21.2562
66.1287	20.8083
66.1807	21.0909
66.2067	20.6935
66.2407	20.9008
66.2927	20.4931
66.3187	20.7164
66.3697	20.2266
66.3956	20.4971
66.4466	20.2417
66.4739	20.2467
66.5254	20.2114
66.5514	19.9931
66.6024	20.2919
66.6298	19.8976
66.6808	20.3573
66.7079	20.0238
66.7589	20.2669
66.7854	20.094
66.8354	20.0355
66.8619	19.9237
66.9129	17.1382
66.9399	13.8267
66.9909	4.09069
67.0169	3.08547
67.0679	2.33274
67.0939	2.5863
67.1459	3.0543
67.1719	3.12982
67.223	3.67281
67.249	3.44855
67.301	3.93501
67.3274	3.65992
67.3614	4.0163
67.4124	3.75791
67.439	4.0922
67.4901	3.72071
67.5156	4.00427
67.5686	3.78554
67.5948	3.97174
67.6288	3.82296
67.6809	4.19579
67.7079	3.86357
67.7429	4.1818
67.7949	4.09242
67.8209	4.28509
67.8729	15.2658
67.8986	20.6472
67.9496	23.1188
67.9766	23.4159
68.0116	22.6833
68.0456	22.4986
68.0976	22.26
68.1236	21.9763
68.1757	21.6518
68.2024	21.6132
68.2544	21.2446
68.2806	21.3887
68.3327	20.878
68.3593	21.2301
68.4113	20.7009
68.4376	20.9779
68.4886	20.4036
68.5146	20.4978
68.5666	20.3313
68.5926	20.2994
68.6446	20.3113
68.6701	20.0415
68.7231	20.2755
68.7497	19.8983
68.8017	20.2746
68.8277	19.8297
68.8787	19.3313
68.9047	17.6564
68.9557	2.71928
69.0463	1.96103
69.0986	2.65314
69.1245	2.7156
69.1776	3.29859
69.2036	3.33443
69.2566	3.56965
69.282	3.60005
69.337	3.81178
69.364	3.71979
69.415	3.82383
69.4416	3.94488
69.4937	3.8542
69.5203	4.08476
69.5743	3.90387
69.5993	4.14598
69.6513	3.83485
69.6775	4.17017
69.7296	3.82259
69.7556	4.09116
69.8086	3.86915
69.8346	4.31361
69.8866	17.8454
69.9127	21.5674
69.9647	23.3984
69.9907	23.0558
70.0437	22.6987
70.0706	22.2197
70.1256	21.9595
70.1517	21.8299
70.1867	21.5707
70.2207	21.7747
70.2557	21.6228
70.2897	21.1079
70.3247	21.2193
70.3757	21.2035
70.4017	21.0324
70.4527	20.7729
70.4786	20.9447
70.5306	20.4136
70.5576	20.7596
70.6086	20.0997
70.6347	20.3753
70.6687	20.0563
70.7197	20.3115
70.7467	19.9336
70.7987	20.4113
70.8246	20.173
70.8596	20.2589
70.8946	18.868
70.9466	12.1734
70.9716	2.8394
71.0628	2.77353
71.1148	3.15042
71.1398	3.54377
71.1918	3.60271
71.2171	3.98773
71.2691	3.7533
71.2941	4.10102
71.3461	3.90262
71.372	4.04851
71.424	4.10036
71.449	3.99822
71.501	4.34902
71.5266	4.05243
71.5786	4.45731
71.6046	4.19549
71.6556	4.39334
71.6806	4.37247
71.7317	4.21092
71.7575	4.4725
71.8095	4.13827
71.8355	4.4307
71.8868	14.4949
71.9129	20.2721
71.9639	23.5153
71.9899	23.4215
72.0409	23.1983
72.0676	22.5792
72.1186	22.6509
72.1456	22.1133
72.1976	22.178
72.2236	21.7892
72.2756	21.6613
72.3012	21.4323
72.3532	21.0623
72.3796	21.1201
72.4306	20.6369
72.4566	20.8872
72.5096	20.3229
72.5351	20.7093
72.5871	20.1144
72.6126	20.2958
72.6646	20.0891
72.6901	20.0599
72.7421	20.2923
72.7681	20.0007
72.8201	20.2837
72.8466	19.9107
72.8986	18.7059
72.9246	16.1767
72.9766	2.52105
73.0674	2.32116
73.1194	2.97855
73.1454	2.94059
73.1975	3.61598
73.2235	3.44312
73.2745	3.85339
73.3016	3.78923
73.3526	3.79192
73.3776	4.0451
73.4296	3.72658
73.4556	4.06487
73.5076	3.75281
73.5326	4.00827
73.5846	3.90153
73.6099	3.86323
73.661	4.10542
73.687	3.8501
73.739	4.22401
73.7647	3.93773
73.8167	4.26979
73.8417	4.95616
73.8937	19.3164
73.9198	22.189
73.9718	23.4121
73.9979	23.3672
74.05	22.4088
74.076	22.539
74.1281	21.7317
74.1544	21.9158
74.2054	21.3979
74.2321	21.4606
74.2841	21.188
74.3105	21.1904
74.3455	20.9466
74.3955	21.2084
74.4225	20.968
74.4735	20.9369
74.4996	20.8279
74.5526	20.5821
74.5777	20.7574
74.6297	20.4448
74.6556	20.7355
74.7066	20.3065
74.7336	20.6661
74.7846	20.276
74.8111	20.4957
74.8641	20.2981
74.8911	19.9642
74.9441	16.2077
74.9711	11.2521
75.0232	4.08051

## Sheet: Fig. 4l2
x-axis-Time (s)	y-axis-Output Voltage (V)
175.065	2.79309
175.156	2.67923
175.225	2.94116
175.251	3.50274
175.319	3.59006
175.345	3.52497
175.414	4.06914
175.439	3.89992
175.508	3.91219
175.535	4.13674
175.602	3.7986
175.627	3.87642
175.696	4.12294
175.722	3.79392
175.79	3.9673
175.816	4.12228
175.884	3.71003
175.91	3.97611
175.978	14.7661
176.004	19.5791
176.072	22.6874
176.098	22.2665
176.167	21.1933
176.194	21.279
176.262	20.1958
176.289	20.1761
176.357	20.0213
176.384	19.549
176.452	19.7764
176.478	19.5008
176.545	19.114
176.571	19.397
176.639	19.1116
176.666	18.9356
176.735	19.3137
176.761	18.9194
176.829	19.2676
176.856	19.3939
176.924	19.0911
176.951	19.53
177.019	16.4945
177.046	13.1118
177.115	3.02218
177.142	1.93928
177.21	2.57742
177.237	2.7835
177.305	2.95389
177.331	3.355
177.4	3.25348
177.426	3.32096
177.494	3.67263
177.52	3.32658
177.589	3.55629
177.615	3.71061
177.683	3.32137
177.709	3.53298
177.778	3.55191
177.804	3.31788
177.873	3.73036
177.899	3.53015
177.966	21.1349
178.057	21.8849
178.126	21.2396
178.152	21.2615
178.22	20.2352
178.245	19.9942
178.314	19.8813
178.341	19.3472
178.409	19.3042
178.436	19.1576
178.505	18.5776
178.531	18.923
178.599	18.422
178.626	18.3592
178.694	18.6766
178.72	18.3712
178.788	18.4317
178.813	18.7105
178.882	18.1836
178.908	18.4721
178.976	17.9024
179.004	16.6654
179.073	1.40384
179.164	0.97372
179.233	2.00625
179.259	1.98724
179.327	2.34868
179.353	2.64911
179.421	2.4135
179.448	2.65771
179.517	2.78946
179.542	2.54202
179.61	2.95562
179.636	2.92702
179.704	2.68629
179.73	3.00347
179.799	2.83395
179.824	2.75848
179.894	3.13184
179.92	2.78592
179.99	15.0789
180.016	19.3486
180.086	21.3519
180.113	21.3209
180.182	20.1047
180.208	20.1571
180.276	19.7255
180.301	19.3232
180.37	19.3754
180.396	19.1049
180.466	18.6299
180.492	18.9999
180.561	18.452
180.588	18.7592
180.657	18.6727
180.683	18.4393
180.752	18.9521
180.779	18.6413
180.847	18.7394
180.874	18.8753
180.945	18.5955
180.972	18.6585
181.04	13.8795
181.065	2.23269
181.156	1.56048
181.225	2.1032
181.251	2.61428
181.321	2.56838
181.347	2.82843
181.416	3.03661
181.442	2.83645
181.512	3.28882
181.538	3.04095
181.607	3.19038
181.634	3.31623
181.702	2.93867
181.729	3.24882
181.797	3.08138
181.823	2.95446
181.892	3.34519
181.918	3.04683
181.987	12.3313
182.013	18.3544
182.082	21.5638
182.108	21.612
182.177	20.4733
182.203	20.1317
182.272	20.1088
182.3	19.5674
182.369	19.6673
182.395	19.4562
182.464	19.075
182.49	19.4126
182.559	18.75
182.586	18.9621
182.656	18.7023
182.682	18.5337
182.752	18.8148
182.779	18.5312
182.848	18.899
182.875	18.88
182.944	18.7117
182.97	19.0358
183.039	15.244
183.065	11.2261
183.135	2.37539
183.161	1.54829
183.23	2.48024
183.257	2.44632
183.326	2.98915
183.352	3.18628
183.422	3.07203
183.448	3.44335
183.517	3.17345
183.544	3.26653
183.613	3.47978
183.639	3.20388
183.708	3.56709
183.733	3.53164
183.802	3.29914
183.828	3.64071
183.899	3.24985
183.926	3.46587
183.995	14.6458
184.021	19.4048
184.09	22.1812
184.116	21.6155
184.185	20.7462
184.212	20.6639
184.281	19.8439
184.308	20.0551
184.377	19.4703
184.403	19.2774
184.472	19.3967
184.499	18.8677
184.569	19.15
184.595	18.7502
184.666	18.7286
184.693	18.5276
184.763	18.4008
184.789	18.6801
184.858	18.3095
184.884	18.5935
184.954	18.5618
184.981	18.0896
185.051	13.884
185.077	1.70669
185.168	1.69014
185.238	1.93319
185.264	2.35484
185.335	2.72974
185.362	2.72491
185.431	3.25283
185.457	2.94669
185.528	3.39158
185.554	3.26022
185.624	3.23189
185.649	3.46437
185.72	3.1279
185.746	3.41592
185.816	3.24164
185.842	3.22581
185.912	3.51604
185.938	3.21967
186.008	14.9665
186.034	19.5299
186.104	22.0187
186.131	21.8336
186.2	20.5324
186.227	20.705
186.298	19.6292
186.323	19.6511
186.394	19.3277
186.419	19.0059
186.489	19.1912
186.516	18.8016
186.586	18.9265
186.613	18.8223
186.682	18.7418
186.708	19.0845
186.777	18.8051
186.804	19.0966
186.873	19.0793
186.899	18.8649
186.97	19.2663
186.997	18.2104
187.067	11.4741
187.093	6.24273
187.162	1.96353
187.187	2.38719
187.257	2.6316
187.283	2.9644
187.352	3.3569
187.378	3.19611
187.448	3.72211
187.475	3.51512
187.544	3.64007
187.57	3.78332
187.64	3.48122
187.665	3.83681
187.736	3.51801
187.763	3.70708
187.833	3.7844
187.858	3.55091
187.929	3.97298
187.955	3.87037
188.025	20.36
188.052	21.9977
188.122	21.957
188.148	21.7725
188.218	20.5624
188.244	20.5636
188.315	19.9055
188.341	19.6431
188.41	19.6471
188.437	19.1839
188.507	19.3321
188.534	18.9283
188.604	18.9758
188.631	18.8787
188.7	18.4379
188.727	18.7605
188.797	18.2083
188.824	18.5602
188.894	18.2677
188.921	18.345
188.99	18.1593
189.017	16.8222
189.087	1.89842
189.177	1.57656
189.249	2.64653
189.275	2.56372
189.346	3.26313
189.371	3.2266
189.441	3.19807
189.466	3.51558
189.536	3.1632
189.562	3.46922
189.632	3.37765
189.659	3.35072
189.73	3.59626
189.756	3.37023
189.828	3.75017
189.855	3.42872
189.925	3.83856
189.951	3.70898
190.021	19.0122
190.048	21.3356
190.118	21.3357
190.145	21.3244
190.215	20.097
190.241	19.9701
190.311	19.7556
190.336	19.2423
190.407	19.4819
190.433	18.9963
190.503	18.9231
190.529	18.7656
190.6	18.2869
190.626	18.546
190.696	18.0485
190.722	18.2809
190.792	17.9747
190.819	17.9659
190.889	18.1031
190.916	17.8735
190.987	17.9985
191.013	16.7702
191.083	1.50505
191.174	0.91302
191.244	1.92118
191.269	2.10841
191.34	2.42581
191.367	2.71013
191.437	2.48206
191.463	2.82513
191.534	2.63432
191.561	2.88017
191.631	2.90561
191.658	2.8102
191.729	3.18013
191.755	2.8909
191.826	3.34585
191.852	3.10702
191.924	3.39764
191.95	3.31606
192.021	18.8683
192.047	21.0147
192.118	20.8772
192.144	20.9461
192.215	19.7503
192.241	19.7673
192.311	19.2633
192.337	18.8818
192.408	18.8959
192.435	18.4566
192.506	18.7103
192.532	18.2185
192.603	18.5246
192.63	18.2176
192.701	18.1416
192.727	18.0976
192.799	17.8797
192.825	18.0108
192.896	17.517
192.923	17.8396
192.994	17.1237
193.02	16.4991
193.092	0.81043
193.183	0.92036
193.254	1.21865
193.28	1.68876
193.351	2.02388
193.376	2.04578
193.448	2.52409
193.474	2.21732
193.545	2.77518
193.571	2.53272
193.642	2.82871
193.667	2.88287
193.738	2.75227
193.764	3.05485
193.835	2.75633
193.861	3.07622
193.932	2.89949
193.958	3.25164
194.028	19.588
194.055	20.7757
194.126	21.128
194.152	20.4893
194.224	20.1194
194.25	19.7462
194.321	19.6032
194.348	19.4574
194.419	19.0988
194.445	19.2308
194.517	18.5768
194.543	18.9021
194.613	18.1904
194.64	18.4513
194.711	17.9748
194.737	18.005
194.808	18.0637
194.835	17.7439
194.907	17.8522
194.933	17.4272
195.004	17.1228
195.03	15.2895
195.101	3.88128
195.127	1.75898
195.199	1.14497
195.225	1.45204
195.297	1.87007
195.323	2.24453
195.395	2.12433
195.42	2.5034
195.493	2.27662
195.519	2.50797
195.59	2.42222
195.617	2.51662
195.688	2.67584
195.714	2.51488
195.786	2.8547
195.812	2.58352
195.884	3.01149
195.91	2.73293
195.982	5.92748
196.009	13.571
196.08	21.1684
196.105	21.2152
196.178	20.3243
196.205	20.2303
196.276	19.3384
196.303	19.4794
196.374	18.5849
196.4	18.7953
196.471	18.1291
196.497	18.1472
196.569	17.9276
196.595	17.7224
196.667	17.9148
196.694	17.5634
196.765	17.893
196.792	17.4293
196.863	17.7968
196.889	17.3427
196.961	17.564
196.987	17.3265
197.059	14.8181
197.085	11.9154
197.156	1.01268
197.182	0.56308
197.252	0.51018
197.278	1.00013
197.35	1.32123
197.376	1.54172
197.449	1.71775
197.474	1.68015
197.546	2.0538
197.572	1.8025
197.643	2.29058
197.669	2.04995
197.74	2.3817
197.767	2.26781
197.839	2.37538
197.865	2.41799
197.936	2.31896
197.963	3.06945
198.036	19.1687
198.063	20.6827
198.135	20.18
198.161	20.1938
198.233	19.1982
198.26	19.4454
198.332	18.8233
198.359	18.9977
198.431	18.5537
198.457	18.7164
198.528	18.4917
198.554	18.3044
198.625	18.5439
198.651	18.1706
198.723	18.5767
198.748	18.271
198.819	18.4546
198.845	18.4219
198.917	18.4415
198.943	18.7161
199.015	17.5807
199.041	16.6959
199.113	4.74056
199.139	2.49482
199.21	1.22422
199.236	1.57769
199.308	2.10991
199.333	2.20345
199.405	2.64164
199.432	2.44246
199.503	2.93407
199.528	2.6623
199.6	3.06859
199.626	2.91248
199.698	3.08312
199.724	3.10707
199.796	3.01047
199.822	3.23092
199.895	3.00936
199.921	3.28387
199.993	4.7454
200.018	12.6033

[truncated: 2 more sheets: Fig. 4l3, Fig. 4l4]
