# Supplementary material for: Hierarchically heterogeneous interface structuring strategy for microenvironment-regulating and self-decontaminating biodegradable meta-membranes
Source: Research Square preprint supplement (doi:10.21203/rs.3.rs-7509740/v1), 2026-01-06
Supplement: Supplementary file 2 [file 4065c8ca5290d5caf7d4926c.xlsx]

## Sheet: Fig. 6b
x-axis	y-axis-Antibacterial Efficiency (%)	y-axis error
P-PLA	25.5	0.5
MRSD-PLA2	37.3	0.8
MRSD-PLA4	61.6	0.7
MRSD-PLA6	90.3	0.7
