# Supplementary material for: Hierarchically heterogeneous interface structuring strategy for microenvironment-regulating and self-decontaminating biodegradable meta-membranes
Source: Research Square preprint supplement (doi:10.21203/rs.3.rs-7509740/v1), 2026-01-06
Supplement: Supplementary file 3 [file 45885dcce1b3f1a86e900f9b.xlsx]

## Sheet: Fig. 2g
x-axis-Wavenumber (cm‒1)	y-axis-Transmittance (a.u.)
	P-PLA	MRSD-PLA2	MRSD-PLA4	MRSD-PLA6
4000	99.14	99.76	99.91	99.59
3999	99.14	99.77	99.91	99.57
3998	99.14	99.77	99.92	99.56
3997	99.13	99.77	99.92	99.55
3996	99.13	99.77	99.92	99.54
3995	99.12	99.76	99.92	99.54
3994	99.12	99.75	99.91	99.54
3993	99.12	99.75	99.9	99.54
3992	99.12	99.75	99.89	99.54
3991	99.11	99.74	99.89	99.54
3990	99.11	99.74	99.89	99.54
3989	99.11	99.74	99.9	99.54
3988	99.11	99.75	99.9	99.53
3987	99.1	99.75	99.9	99.52
3986	99.1	99.74	99.89	99.52
3985	99.1	99.73	99.88	99.51
3984	99.1	99.72	99.87	99.52
3983	99.1	99.71	99.86	99.52
3982	99.1	99.71	99.85	99.51
3981	99.1	99.7	99.85	99.5
3980	99.1	99.7	99.86	99.5
3979	99.1	99.69	99.86	99.49
3978	99.1	99.69	99.85	99.49
3977	99.1	99.69	99.85	99.5
3976	99.1	99.69	99.84	99.49
3975	99.1	99.7	99.84	99.49
3974	99.1	99.71	99.84	99.48
3973	99.1	99.7	99.83	99.48
3972	99.1	99.69	99.83	99.48
3971	99.1	99.69	99.83	99.47
3970	99.1	99.69	99.83	99.47
3969	99.1	99.69	99.83	99.47
3968	99.1	99.69	99.82	99.47
3967	99.1	99.69	99.81	99.47
3966	99.09	99.69	99.81	99.47
3965	99.09	99.7	99.82	99.47
3964	99.09	99.7	99.82	99.47
3963	99.09	99.7	99.83	99.47
3962	99.09	99.71	99.84	99.47
3961	99.09	99.71	99.85	99.48
3960	99.09	99.71	99.85	99.49
3959	99.09	99.7	99.84	99.49
3958	99.09	99.71	99.84	99.49
3957	99.09	99.71	99.83	99.49
3956	99.09	99.71	99.83	99.49
3955	99.09	99.71	99.83	99.49
3954	99.09	99.71	99.84	99.49
3953	99.09	99.71	99.84	99.49
3952	99.09	99.71	99.85	99.49
3951	99.09	99.71	99.85	99.49
3950	99.09	99.71	99.84	99.49
3949	99.09	99.71	99.84	99.48
3948	99.09	99.71	99.84	99.48
3947	99.09	99.71	99.84	99.49
3946	99.09	99.71	99.84	99.49
3945	99.09	99.71	99.84	99.49
3944	99.09	99.71	99.84	99.5
3943	99.09	99.71	99.84	99.5
3942	99.08	99.71	99.84	99.5
3941	99.08	99.72	99.84	99.5
3940	99.08	99.72	99.84	99.5
3939	99.08	99.72	99.84	99.49
3938	99.07	99.72	99.85	99.49
3937	99.07	99.72	99.85	99.49
3936	99.07	99.72	99.86	99.49
3935	99.07	99.72	99.87	99.49
3934	99.07	99.72	99.87	99.49
3933	99.08	99.73	99.86	99.49
3932	99.08	99.73	99.86	99.49
3931	99.08	99.73	99.85	99.49
3930	99.08	99.72	99.84	99.48
3929	99.09	99.72	99.84	99.48
3928	99.09	99.72	99.84	99.48
3927	99.1	99.72	99.85	99.48
3926	99.1	99.72	99.85	99.48
3925	99.1	99.72	99.85	99.48
3924	99.11	99.72	99.84	99.48
3923	99.11	99.72	99.84	99.48
3922	99.11	99.72	99.83	99.48
3921	99.12	99.72	99.82	99.48
3920	99.12	99.72	99.82	99.48
3919	99.12	99.72	99.83	99.48
3918	99.12	99.71	99.84	99.49
3917	99.12	99.71	99.84	99.48
3916	99.11	99.71	99.84	99.48
3915	99.11	99.71	99.83	99.47
3914	99.11	99.71	99.82	99.47
3913	99.1	99.71	99.81	99.47
3912	99.1	99.71	99.81	99.46
3911	99.1	99.71	99.81	99.46
3910	99.09	99.71	99.82	99.46
3909	99.09	99.71	99.83	99.46
3908	99.09	99.71	99.85	99.46
3907	99.09	99.71	99.85	99.47
3906	99.09	99.71	99.85	99.47
3905	99.09	99.7	99.86	99.47
3904	99.09	99.71	99.87	99.47
3903	99.08	99.71	99.88	99.47
3902	99.08	99.71	99.89	99.47
3901	99.08	99.7	99.89	99.47
3900	99.08	99.7	99.87	99.46
3899	99.08	99.7	99.84	99.46
3898	99.08	99.69	99.8	99.46
3897	99.08	99.69	99.77	99.45
3896	99.07	99.69	99.74	99.45
3895	99.07	99.69	99.74	99.44
3894	99.07	99.69	99.74	99.44
3893	99.07	99.69	99.75	99.45
3892	99.07	99.68	99.76	99.45
3891	99.06	99.68	99.77	99.45
3890	99.06	99.68	99.77	99.45
3889	99.06	99.68	99.78	99.45
3888	99.06	99.68	99.78	99.44
3887	99.06	99.68	99.78	99.44
3886	99.06	99.68	99.78	99.43
3885	99.06	99.68	99.79	99.43
3884	99.06	99.68	99.79	99.42
3883	99.06	99.68	99.8	99.42
3882	99.06	99.68	99.8	99.42
3881	99.06	99.67	99.81	99.42
3880	99.06	99.67	99.81	99.42
3879	99.06	99.67	99.81	99.42
3878	99.06	99.67	99.8	99.42
3877	99.06	99.67	99.8	99.41
3876	99.06	99.67	99.79	99.41
3875	99.06	99.67	99.79	99.4
3874	99.06	99.67	99.78	99.39
3873	99.06	99.67	99.77	99.38
3872	99.06	99.67	99.77	99.38
3871	99.06	99.67	99.77	99.38
3870	99.06	99.67	99.77	99.39
3869	99.06	99.67	99.76	99.39
3868	99.06	99.66	99.76	99.39
3867	99.06	99.66	99.75	99.39
3866	99.06	99.66	99.75	99.38
3865	99.06	99.65	99.74	99.38
3864	99.06	99.65	99.74	99.37
3863	99.06	99.65	99.74	99.37
3862	99.06	99.65	99.74	99.37
3861	99.06	99.65	99.73	99.37
3860	99.06	99.65	99.73	99.37
3859	99.06	99.65	99.73	99.36
3858	99.06	99.65	99.73	99.36
3857	99.06	99.65	99.73	99.35
3856	99.06	99.65	99.73	99.35
3855	99.06	99.65	99.73	99.35
3854	99.06	99.65	99.72	99.35
3853	99.05	99.65	99.72	99.35
3852	99.05	99.65	99.72	99.36
3851	99.05	99.64	99.72	99.36
3850	99.05	99.65	99.71	99.36
3849	99.05	99.65	99.71	99.37
3848	99.04	99.65	99.71	99.37
3847	99.04	99.65	99.71	99.37
3846	99.04	99.65	99.7	99.36
3845	99.03	99.65	99.7	99.35
3844	99.03	99.65	99.7	99.34
3843	99.03	99.65	99.69	99.33
3842	99.03	99.65	99.69	99.33
3841	99.03	99.65	99.69	99.32
3840	99.03	99.65	99.69	99.31
3839	99.03	99.65	99.69	99.31
3838	99.03	99.65	99.68	99.3
3837	99.03	99.64	99.68	99.29
3836	99.03	99.64	99.68	99.3
3835	99.04	99.63	99.68	99.3
3834	99.04	99.63	99.68	99.31
3833	99.04	99.63	99.68	99.31
3832	99.04	99.62	99.68	99.33
3831	99.04	99.63	99.68	99.34
3830	99.04	99.63	99.68	99.34
3829	99.04	99.64	99.68	99.34
3828	99.04	99.65	99.68	99.34
3827	99.04	99.66	99.68	99.33
3826	99.04	99.66	99.68	99.32
3825	99.04	99.66	99.68	99.31
3824	99.03	99.65	99.68	99.31
3823	99.03	99.65	99.68	99.3
3822	99.03	99.66	99.68	99.28
3821	99.02	99.66	99.68	99.29
3820	99.02	99.65	99.68	99.3
3819	99.02	99.65	99.68	99.3
3818	99.02	99.64	99.68	99.31
3817	99.02	99.64	99.68	99.3
3816	99.02	99.63	99.68	99.3
3815	99.02	99.64	99.68	99.29
3814	99.02	99.64	99.68	99.3
3813	99.02	99.64	99.68	99.31
3812	99.02	99.64	99.68	99.32
3811	99.03	99.63	99.68	99.33
3810	99.03	99.63	99.68	99.34
3809	99.03	99.64	99.69	99.34
3808	99.03	99.64	99.69	99.34
3807	99.03	99.65	99.69	99.33
3806	99.03	99.65	99.69	99.32
3805	99.03	99.64	99.69	99.31
3804	99.03	99.64	99.69	99.3
3803	99.03	99.64	99.69	99.29
3802	99.03	99.65	99.69	99.31
3801	99.02	99.65	99.69	99.32
3800	99.02	99.65	99.7	99.34
3799	99.02	99.66	99.7	99.34
3798	99.01	99.66	99.7	99.35
3797	99.01	99.67	99.7	99.35
3796	99.01	99.66	99.7	99.36
3795	99.01	99.66	99.71	99.37
3794	99.01	99.65	99.71	99.37
3793	99.01	99.65	99.71	99.37
3792	99.01	99.65	99.7	99.38
3791	99	99.65	99.7	99.38
3790	99	99.65	99.7	99.37
3789	99	99.65	99.7	99.37
3788	99	99.64	99.7	99.37
3787	99	99.64	99.7	99.36
3786	99.01	99.64	99.7	99.36
3785	99.01	99.64	99.7	99.35
3784	99.01	99.64	99.7	99.35
3783	99.01	99.65	99.7	99.36
3782	99.01	99.65	99.7	99.36
3781	99.01	99.65	99.7	99.36
3780	99.01	99.64	99.7	99.37
3779	99.01	99.63	99.7	99.37
3778	99.02	99.63	99.7	99.38
3777	99.02	99.63	99.71	99.38
3776	99.02	99.64	99.71	99.37
3775	99.02	99.65	99.71	99.37
3774	99.02	99.66	99.7	99.36
3773	99.02	99.66	99.7	99.36
3772	99.02	99.66	99.7	99.36
3771	99.02	99.66	99.7	99.37
3770	99.02	99.66	99.7	99.37
3769	99.02	99.66	99.7	99.36
3768	99.02	99.66	99.7	99.36
3767	99.02	99.66	99.7	99.35
3766	99.02	99.66	99.7	99.35
3765	99.01	99.65	99.69	99.34
3764	99.01	99.64	99.69	99.34
3763	99.01	99.62	99.69	99.34
3762	99.01	99.62	99.69	99.34
3761	99.01	99.62	99.69	99.34
3760	99.01	99.63	99.69	99.34
3759	99.01	99.63	99.69	99.34
3758	99	99.63	99.69	99.34
3757	99	99.64	99.69	99.34
3756	99	99.66	99.69	99.33
3755	99	99.68	99.69	99.33
3754	99	99.71	99.69	99.33
3753	99	99.73	99.69	99.32
3752	99	99.74	99.69	99.33
3751	98.99	99.72	99.69	99.33
3750	98.99	99.69	99.69	99.33
3749	98.99	99.67	99.69	99.33
3748	98.99	99.64	99.68	99.34
3747	98.99	99.61	99.68	99.34
3746	98.99	99.58	99.68	99.34
3745	98.99	99.56	99.68	99.34
3744	98.99	99.55	99.68	99.34
3743	98.99	99.55	99.68	99.33
3742	98.99	99.55	99.68	99.33
3741	99	99.54	99.68	99.34
3740	99	99.53	99.68	99.34
3739	99	99.52	99.68	99.34
3738	99.01	99.52	99.67	99.34
3737	99.01	99.54	99.67	99.34
3736	99.02	99.56	99.67	99.34
3735	99.02	99.58	99.67	99.34
3734	99.03	99.6	99.67	99.34
3733	99.03	99.62	99.67	99.34
3732	99.04	99.64	99.67	99.35
3731	99.04	99.63	99.67	99.35
3730	99.05	99.61	99.67	99.35
3729	99.05	99.59	99.67	99.35
3728	99.05	99.57	99.67	99.35
3727	99.05	99.57	99.67	99.35
3726	99.06	99.58	99.67	99.35
3725	99.06	99.58	99.67	99.36
3724	99.06	99.59	99.67	99.36
3723	99.06	99.59	99.67	99.36
3722	99.06	99.59	99.67	99.36
3721	99.05	99.59	99.67	99.36
3720	99.05	99.59	99.67	99.36
3719	99.05	99.59	99.67	99.36
3718	99.04	99.6	99.67	99.35
3717	99.04	99.6	99.67	99.35
3716	99.04	99.6	99.67	99.35
3715	99.04	99.6	99.67	99.35
3714	99.03	99.6	99.67	99.35
3713	99.03	99.6	99.67	99.35
3712	99.03	99.59	99.67	99.36
3711	99.03	99.58	99.67	99.36
3710	99.03	99.57	99.67	99.36
3709	99.03	99.56	99.67	99.35
3708	99.02	99.55	99.67	99.35
3707	99.02	99.54	99.67	99.35
3706	99.02	99.53	99.67	99.36
3705	99.02	99.52	99.67	99.36
3704	99.02	99.51	99.66	99.36
3703	99.02	99.51	99.66	99.37
3702	99.02	99.5	99.66	99.37
3701	99.02	99.49	99.66	99.37
3700	99.02	99.49	99.66	99.37
3699	99.02	99.5	99.67	99.37
3698	99.02	99.51	99.67	99.36
3697	99.02	99.52	99.67	99.35
3696	99.02	99.54	99.67	99.35
3695	99.02	99.56	99.67	99.35
3694	99.02	99.57	99.67	99.35
3693	99.02	99.57	99.67	99.35
3692	99.02	99.58	99.67	99.35
3691	99.02	99.58	99.67	99.34
3690	99.02	99.59	99.67	99.35
3689	99.02	99.59	99.66	99.35
3688	99.02	99.57	99.66	99.35
3687	99.02	99.56	99.66	99.35
3686	99.02	99.56	99.66	99.35
3685	99.01	99.57	99.66	99.35
3684	99.01	99.58	99.66	99.36
3683	99.01	99.58	99.66	99.36
3682	99.01	99.58	99.66	99.36
3681	99.01	99.58	99.66	99.36
3680	99	99.57	99.66	99.36
3679	99	99.56	99.66	99.36
3678	99	99.55	99.66	99.36
3677	98.99	99.54	99.66	99.36
3676	98.99	99.54	99.66	99.36
3675	98.99	99.53	99.66	99.36
3674	98.99	99.53	99.66	99.37
3673	98.98	99.53	99.66	99.37
3672	98.98	99.54	99.66	99.37
3671	98.99	99.56	99.66	99.37
3670	98.99	99.56	99.66	99.38
3669	98.99	99.56	99.67	99.38
3668	98.99	99.56	99.67	99.39
3667	98.99	99.55	99.67	99.39
3666	99	99.54	99.67	99.39
3665	99	99.55	99.67	99.39
3664	99	99.55	99.67	99.4
3663	99.01	99.56	99.67	99.41
3662	99.01	99.56	99.67	99.41
3661	99.02	99.56	99.67	99.41
3660	99.02	99.56	99.67	99.41
3659	99.02	99.56	99.67	99.41
3658	99.03	99.56	99.67	99.42
3657	99.03	99.57	99.68	99.42
3656	99.04	99.58	99.68	99.42
3655	99.04	99.58	99.68	99.42
3654	99.04	99.59	99.68	99.42
3653	99.04	99.59	99.68	99.43
3652	99.04	99.59	99.68	99.42
3651	99.04	99.59	99.68	99.42
3650	99.04	99.6	99.68	99.41
3649	99.04	99.59	99.68	99.41
3648	99.04	99.58	99.68	99.41
3647	99.04	99.58	99.68	99.42
3646	99.04	99.57	99.69	99.43
3645	99.04	99.58	99.69	99.43
3644	99.04	99.58	99.69	99.43
3643	99.04	99.57	99.69	99.43
3642	99.04	99.57	99.69	99.43
3641	99.04	99.57	99.7	99.43
3640	99.04	99.57	99.7	99.43
3639	99.04	99.57	99.7	99.43
3638	99.04	99.57	99.7	99.43
3637	99.05	99.57	99.7	99.43
3636	99.05	99.57	99.71	99.44
3635	99.05	99.58	99.71	99.44
3634	99.06	99.58	99.71	99.44
3633	99.06	99.58	99.71	99.44
3632	99.06	99.59	99.71	99.45
3631	99.06	99.59	99.72	99.46
3630	99.07	99.6	99.72	99.46
3629	99.07	99.6	99.72	99.47
3628	99.07	99.6	99.73	99.46
3627	99.07	99.6	99.73	99.45
3626	99.07	99.6	99.73	99.45
3625	99.08	99.6	99.73	99.44
3624	99.08	99.61	99.73	99.43
3623	99.08	99.61	99.74	99.43
3622	99.08	99.61	99.74	99.44
3621	99.08	99.62	99.74	99.44
3620	99.08	99.63	99.74	99.43
3619	99.08	99.64	99.75	99.42
3618	99.07	99.64	99.75	99.4
3617	99.07	99.64	99.75	99.4
3616	99.07	99.63	99.75	99.39
3615	99.07	99.63	99.75	99.4
3614	99.07	99.63	99.75	99.41
3613	99.06	99.63	99.75	99.43
3612	99.06	99.62	99.76	99.43
3611	99.06	99.62	99.76	99.44
3610	99.06	99.62	99.76	99.44
3609	99.06	99.62	99.76	99.44
3608	99.07	99.62	99.76	99.44
3607	99.07	99.62	99.76	99.43
3606	99.07	99.62	99.76	99.42
3605	99.08	99.62	99.76	99.42
3604	99.08	99.62	99.76	99.42
3603	99.08	99.62	99.76	99.42
3602	99.09	99.62	99.76	99.42
3601	99.09	99.62	99.76	99.42
3600	99.1	99.62	99.76	99.42
3599	99.1	99.62	99.76	99.42
3598	99.11	99.62	99.77	99.42
3597	99.11	99.62	99.77	99.42
3596	99.12	99.62	99.77	99.42
3595	99.12	99.62	99.77	99.42
3594	99.12	99.62	99.77	99.42
3593	99.12	99.62	99.77	99.42
3592	99.12	99.62	99.78	99.42
3591	99.12	99.62	99.78	99.43
3590	99.11	99.62	99.78	99.43
3589	99.11	99.62	99.77	99.44
3588	99.1	99.62	99.77	99.44
3587	99.1	99.62	99.77	99.44
3586	99.1	99.62	99.77	99.44
3585	99.09	99.62	99.76	99.43
3584	99.08	99.61	99.76	99.43
3583	99.08	99.61	99.76	99.43
3582	99.07	99.61	99.76	99.43
3581	99.07	99.61	99.76	99.43
3580	99.06	99.61	99.76	99.43
3579	99.06	99.61	99.76	99.43
3578	99.06	99.61	99.76	99.43
3577	99.06	99.61	99.76	99.43
3576	99.06	99.61	99.76	99.43
3575	99.06	99.6	99.76	99.44
3574	99.06	99.6	99.76	99.44
3573	99.06	99.6	99.76	99.44
3572	99.06	99.6	99.76	99.44
3571	99.06	99.6	99.76	99.44
3570	99.06	99.6	99.76	99.44
3569	99.06	99.6	99.76	99.44
3568	99.06	99.6	99.76	99.44
3567	99.06	99.6	99.76	99.43
3566	99.06	99.6	99.76	99.43
3565	99.06	99.6	99.76	99.43
3564	99.06	99.6	99.76	99.43
3563	99.06	99.6	99.76	99.43
3562	99.06	99.6	99.76	99.43
3561	99.06	99.6	99.76	99.43
3560	99.06	99.6	99.75	99.43
3559	99.06	99.6	99.75	99.43
3558	99.06	99.6	99.75	99.43
3557	99.06	99.6	99.75	99.43
3556	99.06	99.59	99.75	99.43
3555	99.06	99.59	99.75	99.43
3554	99.07	99.59	99.75	99.43
3553	99.07	99.59	99.75	99.43
3552	99.07	99.6	99.74	99.43
3551	99.07	99.6	99.74	99.43
3550	99.07	99.59	99.74	99.43
3549	99.08	99.59	99.74	99.43
3548	99.08	99.59	99.74	99.43
3547	99.08	99.59	99.74	99.43
3546	99.08	99.59	99.74	99.43
3545	99.08	99.6	99.74	99.43
3544	99.08	99.6	99.74	99.42
3543	99.08	99.6	99.74	99.42
3542	99.08	99.6	99.74	99.42
3541	99.08	99.6	99.74	99.42
3540	99.08	99.59	99.74	99.41
3539	99.08	99.59	99.74	99.41
3538	99.07	99.59	99.74	99.41
3537	99.07	99.59	99.74	99.41
3536	99.07	99.59	99.74	99.41
3535	99.07	99.59	99.74	99.41
3534	99.06	99.59	99.73	99.4
3533	99.06	99.59	99.73	99.4
3532	99.06	99.59	99.72	99.4
3531	99.06	99.59	99.72	99.4
3530	99.05	99.58	99.72	99.4
3529	99.05	99.58	99.72	99.39
3528	99.05	99.58	99.72	99.39
3527	99.05	99.58	99.71	99.39
3526	99.05	99.58	99.71	99.39
3525	99.04	99.58	99.71	99.39
3524	99.04	99.58	99.71	99.39
3523	99.04	99.58	99.71	99.39
3522	99.04	99.58	99.71	99.39
3521	99.03	99.58	99.71	99.39
3520	99.03	99.58	99.7	99.39
3519	99.03	99.58	99.7	99.38
3518	99.02	99.58	99.7	99.38
3517	99.02	99.58	99.7	99.38
3516	99.02	99.58	99.69	99.38
3515	99.01	99.57	99.69	99.38
3514	99.01	99.57	99.69	99.38
3513	99.01	99.57	99.7	99.38
3512	99	99.57	99.7	99.38
3511	99	99.57	99.7	99.37
3510	99	99.57	99.7	99.37
3509	99	99.57	99.7	99.37
3508	99	99.56	99.69	99.37
3507	99	99.55	99.69	99.37
3506	99	99.55	99.69	99.37
3505	99	99.55	99.69	99.37
3504	99	99.55	99.69	99.36
3503	99	99.55	99.69	99.36
3502	99	99.55	99.69	99.36
3501	99	99.55	99.69	99.36
3500	99.01	99.55	99.69	99.36
3499	99.01	99.54	99.69	99.36
3498	99.01	99.54	99.69	99.36
3497	99.01	99.54	99.7	99.36
3496	99.02	99.55	99.7	99.36
3495	99.02	99.56	99.7	99.36
3494	99.02	99.57	99.7	99.37
3493	99.02	99.57	99.7	99.37
3492	99.02	99.58	99.71	99.37
3491	99.02	99.58	99.71	99.37
3490	99.03	99.59	99.71	99.37
3489	99.03	99.59	99.71	99.37
3488	99.03	99.6	99.72	99.37
3487	99.03	99.61	99.72	99.37
3486	99.03	99.61	99.72	99.37
3485	99.03	99.61	99.72	99.37
3484	99.04	99.59	99.72	99.37
3483	99.04	99.58	99.73	99.37
3482	99.04	99.57	99.73	99.37
3481	99.04	99.57	99.73	99.37
3480	99.05	99.58	99.73	99.37
3479	99.05	99.59	99.74	99.37
3478	99.05	99.6	99.74	99.37
3477	99.05	99.6	99.75	99.37
3476	99.06	99.6	99.75	99.37
3475	99.06	99.59	99.75	99.37
3474	99.06	99.59	99.75	99.37
3473	99.06	99.58	99.75	99.37
3472	99.07	99.59	99.75	99.37
3471	99.07	99.6	99.76	99.37
3470	99.07	99.59	99.76	99.37
3469	99.07	99.58	99.77	99.37
3468	99.07	99.57	99.77	99.37
3467	99.07	99.56	99.77	99.37
3466	99.08	99.56	99.77	99.38
3465	99.08	99.57	99.77	99.38
3464	99.08	99.57	99.77	99.38
3463	99.08	99.58	99.77	99.38
3462	99.08	99.6	99.78	99.38
3461	99.08	99.61	99.78	99.38
3460	99.08	99.62	99.79	99.38
3459	99.08	99.63	99.79	99.38
3458	99.08	99.64	99.8	99.38
3457	99.08	99.65	99.8	99.38
3456	99.08	99.66	99.81	99.38
3455	99.08	99.68	99.82	99.38
3454	99.08	99.69	99.82	99.38
3453	99.08	99.69	99.83	99.38
3452	99.08	99.7	99.83	99.38
3451	99.08	99.7	99.83	99.38
3450	99.08	99.71	99.83	99.38
3449	99.08	99.7	99.82	99.38
3448	99.08	99.68	99.81	99.38
3447	99.08	99.66	99.8	99.38
3446	99.08	99.64	99.8	99.38
3445	99.08	99.64	99.8	99.38
3444	99.08	99.65	99.81	99.38
3443	99.08	99.66	99.81	99.38
3442	99.08	99.67	99.81	99.38
3441	99.08	99.67	99.81	99.38
3440	99.07	99.66	99.8	99.38
3439	99.07	99.64	99.79	99.38
3438	99.07	99.62	99.78	99.38
3437	99.07	99.61	99.79	99.38
3436	99.07	99.63	99.8	99.38
3435	99.07	99.65	99.82	99.38
3434	99.08	99.68	99.84	99.38
3433	99.08	99.71	99.84	99.38
3432	99.08	99.72	99.84	99.38
3431	99.08	99.73	99.83	99.38
3430	99.09	99.72	99.83	99.38
3429	99.09	99.71	99.84	99.38
3428	99.09	99.71	99.85	99.38
3427	99.1	99.72	99.86	99.38
3426	99.1	99.73	99.87	99.38
3425	99.1	99.74	99.87	99.38
3424	99.11	99.74	99.87	99.38
3423	99.11	99.72	99.85	99.38
3422	99.11	99.7	99.83	99.38
3421	99.12	99.67	99.81	99.38
3420	99.12	99.63	99.8	99.38
3419	99.12	99.61	99.79	99.38
3418	99.12	99.6	99.78	99.38
3417	99.11	99.59	99.79	99.38
3416	99.11	99.58	99.79	99.38
3415	99.11	99.57	99.79	99.38
3414	99.11	99.56	99.78	99.38
3413	99.1	99.57	99.77	99.38
3412	99.1	99.58	99.76	99.38
3411	99.1	99.61	99.76	99.38
3410	99.09	99.65	99.78	99.38
3409	99.09	99.69	99.8	99.38
3408	99.09	99.72	99.82	99.38
3407	99.08	99.73	99.84	99.38
3406	99.08	99.73	99.84	99.38
3405	99.08	99.73	99.84	99.38
3404	99.08	99.72	99.83	99.38
3403	99.08	99.71	99.82	99.38
3402	99.08	99.71	99.81	99.38
3401	99.08	99.72	99.82	99.38
3400	99.08	99.74	99.83	99.38
3399	99.08	99.73	99.84	99.38
3398	99.08	99.7	99.84	99.38
3397	99.08	99.67	99.83	99.38
3396	99.08	99.64	99.81	99.38
3395	99.08	99.63	99.8	99.39
3394	99.08	99.62	99.79	99.39
3393	99.08	99.62	99.79	99.39
3392	99.08	99.61	99.79	99.38
3391	99.07	99.59	99.79	99.38
3390	99.07	99.56	99.79	99.38
3389	99.07	99.54	99.79	99.37
3388	99.07	99.54	99.79	99.37
3387	99.07	99.55	99.79	99.37
3386	99.07	99.56	99.79	99.37
3385	99.07	99.56	99.79	99.37
3384	99.08	99.56	99.78	99.38
3383	99.08	99.56	99.78	99.38
3382	99.08	99.56	99.79	99.38
3381	99.08	99.57	99.79	99.38
3380	99.08	99.58	99.79	99.38
3379	99.08	99.6	99.79	99.38
3378	99.08	99.6	99.79	99.38
3377	99.08	99.6	99.79	99.38
3376	99.08	99.6	99.79	99.38
3375	99.08	99.6	99.79	99.37
3374	99.08	99.61	99.8	99.37
3373	99.08	99.62	99.8	99.36
3372	99.08	99.62	99.8	99.35
3371	99.08	99.61	99.8	99.34
3370	99.08	99.59	99.8	99.33
3369	99.08	99.58	99.8	99.33
3368	99.08	99.58	99.79	99.34
3367	99.08	99.57	99.79	99.34
3366	99.08	99.56	99.79	99.35
3365	99.08	99.55	99.79	99.36
3364	99.08	99.55	99.79	99.36
3363	99.08	99.55	99.79	99.36
3362	99.08	99.54	99.79	99.36
3361	99.08	99.54	99.79	99.35
3360	99.09	99.54	99.79	99.35
3359	99.09	99.55	99.79	99.36
3358	99.09	99.56	99.79	99.36
3357	99.09	99.57	99.79	99.36
3356	99.09	99.57	99.79	99.36
3355	99.09	99.57	99.79	99.36
3354	99.09	99.56	99.79	99.36
3353	99.09	99.56	99.79	99.36
3352	99.09	99.56	99.79	99.36
3351	99.09	99.57	99.79	99.36
3350	99.1	99.56	99.78	99.36
3349	99.1	99.56	99.78	99.36
3348	99.1	99.55	99.78	99.36
3347	99.1	99.55	99.78	99.36
3346	99.1	99.55	99.78	99.37
3345	99.1	99.55	99.78	99.37
3344	99.1	99.55	99.78	99.37
3343	99.1	99.55	99.78	99.37
3342	99.1	99.55	99.78	99.37
3341	99.1	99.54	99.78	99.37
3340	99.11	99.54	99.77	99.37
3339	99.11	99.54	99.77	99.37
3338	99.1	99.54	99.77	99.38
3337	99.1	99.54	99.78	99.38
3336	99.1	99.55	99.78	99.38
3335	99.1	99.55	99.78	99.38
3334	99.1	99.56	99.78	99.38
3333	99.1	99.57	99.78	99.38
3332	99.1	99.58	99.77	99.38
3331	99.1	99.58	99.77	99.38
3330	99.09	99.57	99.76	99.38
3329	99.09	99.55	99.76	99.38
3328	99.09	99.53	99.76	99.38
3327	99.09	99.52	99.76	99.38
3326	99.09	99.52	99.76	99.38
3325	99.09	99.52	99.75	99.38
3324	99.09	99.52	99.75	99.39
3323	99.09	99.51	99.75	99.39
3322	99.09	99.5	99.75	99.39
3321	99.09	99.49	99.75	99.39
3320	99.09	99.49	99.75	99.39
3319	99.09	99.49	99.75	99.39
3318	99.09	99.49	99.75	99.39
3317	99.09	99.5	99.75	99.39
3316	99.1	99.5	99.75	99.39
3315	99.1	99.5	99.75	99.39
3314	99.1	99.5	99.75	99.39
3313	99.1	99.5	99.75	99.39
3312	99.1	99.51	99.75	99.39
3311	99.1	99.51	99.75	99.39
3310	99.1	99.5	99.74	99.39
3309	99.1	99.5	99.74	99.39
3308	99.1	99.49	99.74	99.4
3307	99.1	99.49	99.74	99.4
3306	99.1	99.48	99.74	99.4
3305	99.1	99.48	99.74	99.39
3304	99.1	99.49	99.74	99.38
3303	99.1	99.49	99.74	99.38
3302	99.1	99.5	99.74	99.37
3301	99.1	99.49	99.74	99.37
3300	99.1	99.49	99.74	99.36
3299	99.1	99.48	99.74	99.36
3298	99.09	99.47	99.74	99.36
3297	99.09	99.46	99.74	99.36
3296	99.09	99.45	99.74	99.36
3295	99.09	99.45	99.74	99.36
3294	99.09	99.46	99.74	99.36
3293	99.09	99.47	99.74	99.36
3292	99.09	99.48	99.74	99.36
3291	99.09	99.49	99.74	99.36
3290	99.09	99.48	99.74	99.36
3289	99.09	99.48	99.74	99.36
3288	99.09	99.49	99.74	99.35
3287	99.09	99.49	99.74	99.36
3286	99.09	99.5	99.75	99.36
3285	99.09	99.51	99.75	99.37
3284	99.09	99.51	99.75	99.37
3283	99.09	99.5	99.75	99.37
3282	99.09	99.5	99.75	99.36
3281	99.09	99.49	99.75	99.36
3280	99.09	99.49	99.75	99.35
3279	99.09	99.49	99.75	99.35
3278	99.09	99.49	99.75	99.34
3277	99.09	99.49	99.75	99.33
3276	99.09	99.48	99.75	99.32
3275	99.09	99.48	99.75	99.32
3274	99.09	99.48	99.75	99.33
3273	99.08	99.49	99.75	99.33
3272	99.08	99.5	99.75	99.34
3271	99.08	99.51	99.75	99.34
3270	99.07	99.51	99.75	99.34
3269	99.07	99.52	99.75	99.34
3268	99.07	99.53	99.75	99.34
3267	99.07	99.54	99.76	99.34
3266	99.07	99.54	99.76	99.35
3265	99.06	99.53	99.76	99.34
3264	99.06	99.52	99.76	99.34
3263	99.06	99.5	99.76	99.34
3262	99.06	99.5	99.76	99.34
3261	99.06	99.5	99.76	99.34
3260	99.07	99.5	99.76	99.34
3259	99.07	99.5	99.76	99.34
3258	99.07	99.49	99.76	99.33
3257	99.08	99.48	99.76	99.33
3256	99.08	99.47	99.76	99.33
3255	99.08	99.46	99.76	99.33
3254	99.09	99.46	99.76	99.34
3253	99.09	99.47	99.76	99.34
3252	99.1	99.48	99.76	99.34
3251	99.1	99.48	99.76	99.34
3250	99.1	99.48	99.76	99.34
3249	99.11	99.49	99.76	99.34
3248	99.11	99.5	99.76	99.34
3247	99.11	99.51	99.76	99.35
3246	99.11	99.52	99.76	99.36
3245	99.11	99.52	99.76	99.36
3244	99.11	99.53	99.76	99.36
3243	99.11	99.53	99.76	99.36
3242	99.11	99.54	99.76	99.36
3241	99.11	99.54	99.76	99.36
3240	99.11	99.54	99.76	99.36
3239	99.11	99.54	99.76	99.36
3238	99.11	99.54	99.76	99.36
3237	99.11	99.54	99.76	99.36
3236	99.11	99.54	99.76	99.36
3235	99.11	99.55	99.76	99.36
3234	99.11	99.56	99.76	99.36
3233	99.11	99.56	99.76	99.37
3232	99.11	99.55	99.76	99.37
3231	99.11	99.54	99.76	99.38
3230	99.11	99.53	99.76	99.38
3229	99.11	99.52	99.76	99.38
3228	99.11	99.52	99.76	99.38
3227	99.11	99.52	99.76	99.38
3226	99.11	99.52	99.76	99.38
3225	99.11	99.52	99.76	99.38
3224	99.1	99.52	99.76	99.39
3223	99.1	99.51	99.76	99.39
3222	99.1	99.51	99.76	99.39
3221	99.1	99.5	99.76	99.38
3220	99.1	99.49	99.75	99.38
3219	99.1	99.49	99.75	99.38
3218	99.1	99.49	99.75	99.38
3217	99.1	99.5	99.75	99.38
3216	99.1	99.51	99.75	99.38
3215	99.1	99.51	99.75	99.38
3214	99.1	99.51	99.75	99.38
3213	99.1	99.51	99.75	99.39
3212	99.1	99.51	99.75	99.39
3211	99.1	99.5	99.75	99.39
3210	99.1	99.49	99.75	99.39
3209	99.1	99.49	99.75	99.39
3208	99.1	99.49	99.75	99.39
3207	99.1	99.49	99.75	99.39
3206	99.1	99.49	99.75	99.39
3205	99.1	99.49	99.75	99.39
3204	99.1	99.49	99.75	99.39
3203	99.1	99.49	99.75	99.39
3202	99.1	99.49	99.75	99.38
3201	99.1	99.49	99.75	99.38
3200	99.1	99.49	99.75	99.38
3199	99.09	99.49	99.75	99.38
3198	99.09	99.49	99.75	99.39
3197	99.09	99.49	99.75	99.39
3196	99.09	99.48	99.74	99.4
3195	99.09	99.48	99.74	99.4
3194	99.09	99.48	99.74	99.41
3193	99.09	99.48	99.74	99.4
3192	99.1	99.49	99.74	99.4
3191	99.1	99.49	99.74	99.39
3190	99.1	99.49	99.74	99.39
3189	99.1	99.5	99.74	99.39
3188	99.1	99.5	99.74	99.4
3187	99.1	99.49	99.74	99.4
3186	99.1	99.49	99.74	99.41
3185	99.1	99.48	99.74	99.41
3184	99.1	99.47	99.74	99.41
3183	99.1	99.47	99.74	99.41
3182	99.1	99.46	99.74	99.4
3181	99.09	99.47	99.74	99.4
3180	99.09	99.47	99.73	99.39
3179	99.09	99.47	99.73	99.39
3178	99.09	99.47	99.73	99.39
3177	99.09	99.47	99.73	99.38
3176	99.08	99.47	99.73	99.38
3175	99.08	99.48	99.73	99.38
3174	99.08	99.48	99.73	99.38
3173	99.08	99.48	99.73	99.38
3172	99.08	99.47	99.73	99.37
3171	99.09	99.47	99.73	99.38
3170	99.09	99.47	99.73	99.39
3169	99.09	99.47	99.74	99.4
3168	99.09	99.47	99.74	99.41
3167	99.1	99.47	99.73	99.42
3166	99.1	99.47	99.73	99.42
3165	99.1	99.47	99.73	99.43
3164	99.11	99.47	99.73	99.43
3163	99.11	99.47	99.73	99.43
3162	99.12	99.47	99.73	99.43
3161	99.12	99.46	99.73	99.43
3160	99.12	99.46	99.72	99.44
3159	99.12	99.46	99.72	99.43
3158	99.12	99.45	99.72	99.43
3157	99.12	99.45	99.71	99.42
3156	99.12	99.45	99.71	99.41
3155	99.12	99.45	99.71	99.41
3154	99.12	99.45	99.71	99.42
3153	99.12	99.45	99.71	99.42
3152	99.11	99.45	99.71	99.43
3151	99.11	99.45	99.71	99.43
3150	99.1	99.45	99.71	99.43
3149	99.1	99.45	99.71	99.42
3148	99.09	99.45	99.71	99.43
3147	99.09	99.45	99.71	99.43
3146	99.08	99.45	99.71	99.44
3145	99.08	99.45	99.71	99.45
3144	99.08	99.45	99.71	99.45
3143	99.08	99.45	99.7	99.45
3142	99.07	99.45	99.7	99.44
3141	99.07	99.45	99.7	99.43
3140	99.07	99.44	99.7	99.43
3139	99.07	99.44	99.7	99.42
3138	99.08	99.44	99.7	99.42
3137	99.08	99.44	99.7	99.42
3136	99.08	99.44	99.7	99.42
3135	99.09	99.44	99.7	99.42
3134	99.09	99.44	99.7	99.42
3133	99.09	99.43	99.7	99.42
3132	99.1	99.43	99.7	99.43
3131	99.1	99.43	99.69	99.43
3130	99.1	99.43	99.69	99.43
3129	99.1	99.43	99.69	99.43
3128	99.1	99.43	99.69	99.42
3127	99.1	99.43	99.69	99.42
3126	99.11	99.44	99.69	99.42
3125	99.1	99.44	99.69	99.42
3124	99.1	99.44	99.69	99.42
3123	99.1	99.44	99.69	99.42
3122	99.1	99.43	99.69	99.42
3121	99.1	99.43	99.69	99.42
3120	99.1	99.44	99.69	99.42
3119	99.09	99.44	99.69	99.42
3118	99.09	99.44	99.69	99.42
3117	99.09	99.44	99.69	99.42
3116	99.09	99.44	99.69	99.42
3115	99.09	99.44	99.69	99.41
3114	99.08	99.44	99.69	99.41
3113	99.08	99.44	99.69	99.41
3112	99.08	99.44	99.69	99.41
3111	99.08	99.44	99.69	99.41
3110	99.08	99.44	99.69	99.41
3109	99.08	99.44	99.68	99.41
3108	99.08	99.44	99.68	99.41
3107	99.09	99.45	99.68	99.4
3106	99.09	99.45	99.68	99.4
3105	99.09	99.45	99.68	99.4
3104	99.09	99.45	99.68	99.4
3103	99.09	99.45	99.68	99.4
3102	99.1	99.45	99.68	99.4
3101	99.1	99.45	99.68	99.4
3100	99.1	99.45	99.68	99.4
3099	99.1	99.45	99.68	99.4
3098	99.1	99.45	99.68	99.41
3097	99.1	99.45	99.68	99.41
3096	99.1	99.45	99.68	99.41
3095	99.1	99.45	99.68	99.41
3094	99.1	99.45	99.68	99.41
3093	99.09	99.45	99.68	99.41
3092	99.09	99.45	99.68	99.41
3091	99.09	99.46	99.68	99.41
3090	99.09	99.46	99.68	99.41
3089	99.09	99.46	99.68	99.41
3088	99.09	99.46	99.68	99.41
3087	99.09	99.46	99.68	99.4
3086	99.09	99.46	99.68	99.4
3085	99.09	99.46	99.68	99.4
3084	99.09	99.46	99.68	99.4
3083	99.09	99.46	99.67	99.4
3082	99.09	99.46	99.67	99.4
3081	99.09	99.46	99.67	99.41
3080	99.09	99.46	99.67	99.41
3079	99.09	99.46	99.67	99.41
3078	99.09	99.46	99.67	99.41
3077	99.09	99.46	99.67	99.4
3076	99.09	99.46	99.67	99.4
3075	99.09	99.46	99.67	99.41
3074	99.09	99.46	99.67	99.41
3073	99.09	99.45	99.67	99.41
3072	99.09	99.45	99.67	99.41
3071	99.09	99.45	99.67	99.41
3070	99.09	99.45	99.67	99.41
3069	99.09	99.45	99.66	99.41
3068	99.09	99.45	99.66	99.41
3067	99.09	99.45	99.66	99.41
3066	99.09	99.45	99.66	99.41
3065	99.09	99.45	99.66	99.41
3064	99.09	99.45	99.66	99.41
3063	99.09	99.45	99.66	99.41
3062	99.09	99.45	99.66	99.41
3061	99.08	99.45	99.66	99.41
3060	99.08	99.45	99.66	99.41
3059	99.08	99.45	99.66	99.41
3058	99.08	99.45	99.65	99.41
3057	99.08	99.44	99.65	99.41
3056	99.08	99.43	99.65	99.41
3055	99.08	99.43	99.65	99.41
3054	99.08	99.43	99.65	99.42
3053	99.08	99.43	99.65	99.42
3052	99.08	99.44	99.65	99.42
3051	99.08	99.44	99.64	99.42
3050	99.08	99.44	99.64	99.41
3049	99.08	99.44	99.64	99.4
3048	99.08	99.43	99.63	99.4
3047	99.08	99.41	99.63	99.4
3046	99.08	99.4	99.63	99.41
3045	99.08	99.38	99.63	99.41
3044	99.08	99.38	99.62	99.41
3043	99.08	99.38	99.62	99.41
3042	99.08	99.38	99.61	99.41
3041	99.07	99.39	99.6	99.41
3040	99.07	99.39	99.6	99.4
3039	99.07	99.39	99.6	99.39
3038	99.07	99.38	99.6	99.39
3037	99.07	99.37	99.6	99.39
3036	99.06	99.36	99.59	99.39
3035	99.06	99.36	99.58	99.38
3034	99.06	99.36	99.56	99.37
3033	99.06	99.36	99.56	99.36
3032	99.06	99.35	99.56	99.36
3031	99.06	99.34	99.56	99.36
3030	99.05	99.32	99.56	99.36
3029	99.05	99.31	99.55	99.37
3028	99.05	99.29	99.54	99.38
3027	99.05	99.28	99.52	99.38
3026	99.05	99.27	99.5	99.38
3025	99.04	99.28	99.48	99.37
3024	99.04	99.29	99.47	99.37
3023	99.04	99.3	99.47	99.38
3022	99.04	99.31	99.47	99.38
3021	99.03	99.3	99.48	99.37
3020	99.03	99.29	99.48	99.36
3019	99.02	99.26	99.47	99.35
3018	99.02	99.24	99.46	99.34
3017	99.01	99.22	99.44	99.31
3016	99	99.19	99.42	99.29
3015	98.99	99.17	99.4	99.27
3014	98.98	99.16	99.38	99.26
3013	98.97	99.16	99.38	99.25
3012	98.95	99.16	99.39	99.24
3011	98.94	99.16	99.39	99.22
3010	98.92	99.13	99.38	99.21
3009	98.9	99.09	99.35	99.22
3008	98.88	99.04	99.31	99.22
3007	98.86	98.99	99.27	99.21
3006	98.85	98.96	99.24	99.19
3005	98.83	98.95	99.22	99.17
3004	98.81	98.93	99.22	99.17
3003	98.79	98.91	99.23	99.18
3002	98.77	98.88	99.23	99.17
3001	98.76	98.85	99.2	99.15
3000	98.74	98.83	99.15	99.12
2999	98.73	98.81	99.1	99.11
2998	98.72	98.8	99.07	99.09
2997	98.71	98.81	99.07	99.09
2996	98.71	98.82	99.08	99.1
2995	98.71	98.84	99.1	99.11
2994	98.71	98.85	99.11	99.12
2993	98.71	98.86	99.13	99.12
2992	98.72	98.89	99.15	99.11
2991	98.72	98.91	99.16	99.12
2990	98.73	98.93	99.16	99.13
2989	98.75	98.94	99.16	99.15
2988	98.76	98.95	99.17	99.17
2987	98.77	98.97	99.2	99.18
2986	98.79	98.99	99.24	99.19
2985	98.8	99.03	99.29	99.2
2984	98.82	99.06	99.33	99.2
2983	98.83	99.08	99.34	99.2
2982	98.85	99.06	99.32	99.19
2981	98.86	99.03	99.3	99.18
2980	98.87	99	99.28	99.16
2979	98.89	98.98	99.27	99.15
2978	98.9	98.98	99.28	99.14
2977	98.91	98.99	99.29	99.14
2976	98.92	99	99.3	99.16
2975	98.93	99.01	99.3	99.19
2974	98.94	99.02	99.29	99.2
2973	98.94	99.02	99.28	99.2
2972	98.95	99.02	99.27	99.21
2971	98.95	99.03	99.27	99.22
2970	98.96	99.04	99.28	99.23
2969	98.96	99.06	99.3	99.22
2968	98.96	99.07	99.33	99.21
2967	98.96	99.06	99.35	99.21
2966	98.96	99.04	99.36	99.2
2965	98.96	99.01	99.33	99.19
2964	98.95	98.99	99.3	99.16
2963	98.95	98.99	99.26	99.14
2962	98.94	99	99.24	99.14
2961	98.93	99.01	99.23	99.13
2960	98.92	99.02	99.24	99.14
2959	98.91	99.02	99.25	99.13
2958	98.9	99.01	99.25	99.12
2957	98.89	98.99	99.26	99.11
2956	98.88	98.97	99.25	99.11
2955	98.87	98.95	99.23	99.11
2954	98.86	98.91	99.19	99.11
2953	98.84	98.87	99.16	99.1
2952	98.83	98.84	99.14	99.09
2951	98.82	98.82	99.13	99.08
2950	98.81	98.82	99.13	99.06
2949	98.81	98.8	99.12	99.05
2948	98.8	98.78	99.09	99.05
2947	98.79	98.75	99.05	99.05
2946	98.79	98.74	99.03	99.05
2945	98.79	98.75	99.02	99.04
2944	98.79	98.77	99.03	99.04
2943	98.8	98.78	99.05	99.05
2942	98.81	98.77	99.07	99.07
2941	98.82	98.75	99.09	99.08
2940	98.83	98.75	99.11	99.07
2939	98.84	98.78	99.13	99.06
2938	98.86	98.81	99.15	99.06
2937	98.87	98.84	99.18	99.06
2936	98.89	98.86	99.21	99.06
2935	98.9	98.88	99.24	99.05
2934	98.92	98.89	99.26	99.06
2933	98.94	98.89	99.26	99.08
2932	98.95	98.89	99.27	99.09
2931	98.97	98.89	99.27	99.09
2930	98.98	98.89	99.27	99.07
2929	99	98.88	99.27	99.06
2928	99.01	98.87	99.26	99.05
2927	99.02	98.86	99.24	99.04
2926	99.03	98.85	99.24	99.03
2925	99.04	98.84	99.26	99.02
2924	99.04	98.83	99.28	99.02
2923	99.05	98.82	99.3	99.03
2922	99.05	98.81	99.31	99.05
2921	99.06	98.81	99.3	99.06
2920	99.06	98.83	99.31	99.07
2919	99.06	98.86	99.32	99.07
2918	99.06	98.9	99.33	99.09
2917	99.06	98.91	99.34	99.11
2916	99.05	98.92	99.34	99.12
2915	99.05	98.92	99.35	99.14
2914	99.05	98.92	99.37	99.16
2913	99.04	98.94	99.39	99.17
2912	99.04	98.95	99.39	99.16
2911	99.03	98.97	99.39	99.16
2910	99.03	99	99.38	99.16
2909	99.02	99.03	99.37	99.17
2908	99.01	99.05	99.37	99.17
2907	99.01	99.06	99.38	99.18
2906	99.01	99.06	99.39	99.19
2905	99	99.05	99.4	99.2
2904	99	99.06	99.4	99.22
2903	98.99	99.07	99.4	99.22
2902	98.99	99.07	99.4	99.22
2901	98.99	99.07	99.41	99.21
2900	98.98	99.08	99.41	99.21
2899	98.98	99.09	99.42	99.21
2898	98.97	99.11	99.42	99.22
2897	98.97	99.11	99.43	99.22
2896	98.97	99.1	99.43	99.23
2895	98.96	99.09	99.43	99.24
2894	98.96	99.09	99.43	99.24
2893	98.96	99.1	99.43	99.25
2892	98.95	99.11	99.43	99.24
2891	98.95	99.12	99.44	99.24
2890	98.94	99.12	99.44	99.24
2889	98.94	99.12	99.44	99.25
2888	98.93	99.12	99.45	99.25
2887	98.93	99.13	99.45	99.26
2886	98.93	99.13	99.45	99.27
2885	98.93	99.14	99.45	99.27
2884	98.93	99.13	99.44	99.27
2883	98.93	99.12	99.44	99.27
2882	98.93	99.12	99.44	99.27
2881	98.93	99.11	99.44	99.27
2880	98.93	99.11	99.45	99.27
2879	98.94	99.12	99.45	99.27
2878	98.94	99.13	99.46	99.27
2877	98.95	99.14	99.46	99.27
2876	98.95	99.15	99.46	99.27
2875	98.96	99.15	99.46	99.28
2874	98.96	99.16	99.46	99.28
2873	98.97	99.16	99.46	99.28
2872	98.97	99.16	99.47	99.28
2871	98.98	99.16	99.47	99.28
2870	98.98	99.17	99.47	99.28
2869	98.99	99.18	99.47	99.28
2868	98.99	99.18	99.47	99.29
2867	99	99.18	99.47	99.29
2866	99	99.18	99.47	99.29
2865	99.01	99.17	99.47	99.29
2864	99.01	99.17	99.47	99.29
2863	99.02	99.17	99.47	99.29
2862	99.02	99.16	99.47	99.29
2861	99.03	99.16	99.47	99.29
2860	99.03	99.15	99.47	99.29
2859	99.04	99.15	99.47	99.29
2858	99.05	99.16	99.47	99.29
2857	99.05	99.16	99.48	99.29
2856	99.06	99.15	99.48	99.29
2855	99.06	99.14	99.48	99.29
2854	99.06	99.11	99.48	99.29
2853	99.06	99.09	99.48	99.29
2852	99.06	99.09	99.48	99.29
2851	99.06	99.1	99.48	99.29
2850	99.06	99.11	99.48	99.29
2849	99.06	99.12	99.48	99.3
2848	99.06	99.14	99.49	99.3
2847	99.05	99.15	99.49	99.31
2846	99.04	99.16	99.49	99.31
2845	99.04	99.16	99.49	99.31
2844	99.03	99.16	99.49	99.31
2843	99.02	99.17	99.49	99.32
2842	99.02	99.18	99.49	99.32
2841	99.01	99.2	99.5	99.32
2840	99	99.21	99.5	99.33
2839	99	99.21	99.5	99.33
2838	98.99	99.21	99.5	99.33
2837	98.99	99.21	99.5	99.33
2836	98.98	99.22	99.5	99.34
2835	98.98	99.22	99.5	99.34
2834	98.98	99.22	99.5	99.34
2833	98.97	99.22	99.5	99.34
2832	98.97	99.22	99.51	99.34
2831	98.97	99.22	99.51	99.35
2830	98.98	99.23	99.51	99.35
2829	98.98	99.23	99.51	99.35
2828	98.98	99.23	99.51	99.35
2827	98.98	99.24	99.51	99.36
2826	98.99	99.24	99.51	99.36
2825	98.99	99.25	99.51	99.36
2824	98.99	99.26	99.51	99.36
2823	98.99	99.27	99.51	99.36
2822	99	99.27	99.52	99.36
2821	99	99.26	99.52	99.36
2820	99	99.25	99.52	99.37
2819	99	99.24	99.52	99.37
2818	99	99.24	99.52	99.38
2817	99.01	99.24	99.52	99.38
2816	99.01	99.24	99.52	99.39
2815	99	99.25	99.52	99.39
2814	99	99.25	99.52	99.4
2813	99	99.26	99.52	99.4
2812	99	99.26	99.52	99.4
2811	99	99.27	99.52	99.4
2810	98.99	99.27	99.52	99.4
2809	98.99	99.28	99.53	99.4
2808	98.99	99.28	99.53	99.4
2807	98.98	99.28	99.53	99.39
2806	98.98	99.28	99.53	99.39
2805	98.97	99.28	99.53	99.39
2804	98.97	99.28	99.53	99.39
2803	98.97	99.28	99.53	99.39
2802	98.96	99.28	99.53	99.39
2801	98.96	99.28	99.53	99.39
2800	98.96	99.28	99.53	99.4
2799	98.96	99.28	99.53	99.4
2798	98.96	99.29	99.53	99.4
2797	98.96	99.29	99.53	99.4
2796	98.96	99.29	99.53	99.4
2795	98.96	99.29	99.53	99.4
2794	98.96	99.29	99.53	99.4
2793	98.96	99.29	99.53	99.4
2792	98.97	99.29	99.53	99.4
2791	98.97	99.29	99.53	99.4
2790	98.97	99.29	99.53	99.4
2789	98.97	99.29	99.53	99.4
2788	98.98	99.29	99.53	99.4
2787	98.98	99.3	99.53	99.4
2786	98.98	99.3	99.53	99.4
2785	98.98	99.3	99.53	99.41
2784	98.98	99.3	99.53	99.41
2783	98.98	99.3	99.53	99.4
2782	98.98	99.3	99.53	99.4
2781	98.98	99.3	99.53	99.41
2780	98.98	99.3	99.53	99.41
2779	98.98	99.3	99.53	99.41
2778	98.98	99.3	99.54	99.41
2777	98.98	99.3	99.54	99.4
2776	98.97	99.3	99.54	99.4
2775	98.97	99.3	99.54	99.4
2774	98.97	99.3	99.54	99.4
2773	98.97	99.3	99.54	99.4
2772	98.97	99.3	99.54	99.4
2771	98.97	99.3	99.54	99.4
2770	98.97	99.3	99.54	99.4
2769	98.97	99.3	99.54	99.4
2768	98.97	99.3	99.54	99.4
2767	98.97	99.3	99.54	99.4
2766	98.97	99.31	99.54	99.4
2765	98.97	99.3	99.53	99.4
2764	98.97	99.3	99.53	99.4
2763	98.98	99.3	99.53	99.4
2762	98.98	99.3	99.53	99.4
2761	98.98	99.31	99.53	99.4
2760	98.98	99.31	99.53	99.4
2759	98.98	99.31	99.53	99.39
2758	98.98	99.31	99.53	99.39
2757	98.98	99.31	99.53	99.39
2756	98.98	99.31	99.53	99.39
2755	98.98	99.31	99.53	99.39
2754	98.98	99.31	99.53	99.39
2753	98.98	99.31	99.53	99.39
2752	98.98	99.31	99.53	99.39
2751	98.98	99.31	99.53	99.39
2750	98.98	99.31	99.53	99.39
2749	98.98	99.31	99.53	99.39
2748	98.98	99.31	99.53	99.38
2747	98.98	99.31	99.54	99.38
2746	98.98	99.31	99.54	99.38
2745	98.98	99.31	99.54	99.38
2744	98.98	99.31	99.54	99.38
2743	98.98	99.31	99.54	99.38
2742	98.98	99.3	99.54	99.38
2741	98.98	99.3	99.54	99.38
2740	98.98	99.3	99.54	99.37
2739	98.98	99.3	99.54	99.37
2738	98.98	99.3	99.54	99.37
2737	98.98	99.31	99.54	99.37
2736	98.98	99.31	99.54	99.37
2735	98.98	99.31	99.54	99.37
2734	98.98	99.31	99.54	99.37
2733	98.98	99.31	99.54	99.37
2732	98.98	99.31	99.54	99.37
2731	98.97	99.31	99.54	99.37
2730	98.97	99.32	99.54	99.37
2729	98.97	99.32	99.54	99.37
2728	98.97	99.32	99.54	99.37
2727	98.97	99.32	99.54	99.37
2726	98.97	99.32	99.54	99.37
2725	98.97	99.31	99.54	99.36
2724	98.97	99.31	99.54	99.36
2723	98.97	99.31	99.54	99.36
2722	98.96	99.31	99.54	99.36
2721	98.96	99.31	99.54	99.36
2720	98.96	99.31	99.54	99.36
2719	98.96	99.31	99.54	99.36
2718	98.97	99.31	99.54	99.36
2717	98.97	99.31	99.54	99.36
2716	98.97	99.3	99.54	99.36
2715	98.97	99.3	99.55	99.37
2714	98.97	99.31	99.55	99.37
2713	98.97	99.31	99.55	99.37
2712	98.97	99.31	99.55	99.37
2711	98.97	99.31	99.55	99.37
2710	98.97	99.31	99.55	99.37
2709	98.97	99.31	99.55	99.37
2708	98.96	99.31	99.55	99.37
2707	98.96	99.3	99.55	99.37
2706	98.96	99.3	99.55	99.36
2705	98.96	99.31	99.55	99.36
2704	98.95	99.31	99.55	99.36
2703	98.95	99.32	99.55	99.36
2702	98.95	99.32	99.55	99.36
2701	98.95	99.32	99.55	99.37
2700	98.95	99.33	99.55	99.37
2699	98.95	99.32	99.55	99.37
2698	98.95	99.32	99.55	99.37
2697	98.95	99.32	99.55	99.37
2696	98.94	99.32	99.55	99.37
2695	98.94	99.32	99.55	99.37
2694	98.94	99.33	99.55	99.37
2693	98.94	99.33	99.55	99.37
2692	98.95	99.32	99.55	99.37
2691	98.95	99.32	99.55	99.37
2690	98.95	99.32	99.55	99.37
2689	98.95	99.32	99.55	99.37
2688	98.95	99.32	99.55	99.37
2687	98.95	99.32	99.54	99.37
2686	98.95	99.32	99.54	99.37
2685	98.95	99.32	99.54	99.37
2684	98.95	99.32	99.54	99.37
2683	98.94	99.32	99.54	99.37
2682	98.94	99.32	99.54	99.36
2681	98.94	99.32	99.54	99.36
2680	98.94	99.32	99.54	99.35
2679	98.94	99.32	99.54	99.35
2678	98.94	99.32	99.54	99.35
2677	98.94	99.32	99.54	99.35
2676	98.94	99.32	99.54	99.35
2675	98.94	99.32	99.54	99.35
2674	98.93	99.32	99.53	99.35
2673	98.93	99.32	99.53	99.34
2672	98.93	99.32	99.53	99.34
2671	98.93	99.31	99.53	99.34
2670	98.93	99.31	99.53	99.34
2669	98.93	99.31	99.53	99.34
2668	98.92	99.31	99.53	99.34
2667	98.92	99.31	99.52	99.34
2666	98.92	99.31	99.52	99.34
2665	98.92	99.31	99.52	99.34
2664	98.92	99.31	99.51	99.34
2663	98.92	99.31	99.51	99.34
2662	98.92	99.31	99.51	99.34
2661	98.91	99.3	99.51	99.34
2660	98.91	99.3	99.51	99.34
2659	98.91	99.3	99.5	99.34
2658	98.91	99.3	99.5	99.34
2657	98.91	99.3	99.5	99.34
2656	98.91	99.3	99.5	99.34
2655	98.91	99.3	99.5	99.34
2654	98.91	99.3	99.49	99.34
2653	98.91	99.3	99.49	99.34
2652	98.9	99.3	99.49	99.34
2651	98.9	99.3	99.49	99.34
2650	98.9	99.29	99.49	99.34
2649	98.9	99.29	99.49	99.34
2648	98.9	99.29	99.49	99.34
2647	98.9	99.29	99.49	99.34
2646	98.9	99.29	99.49	99.34
2645	98.9	99.29	99.49	99.34
2644	98.89	99.29	99.49	99.34
2643	98.89	99.29	99.49	99.34
2642	98.89	99.29	99.49	99.34
2641	98.89	99.29	99.48	99.34
2640	98.89	99.29	99.48	99.34
2639	98.89	99.29	99.48	99.34
2638	98.89	99.29	99.48	99.35
2637	98.89	99.29	99.48	99.35
2636	98.89	99.29	99.48	99.35
2635	98.89	99.29	99.48	99.35
2634	98.9	99.29	99.48	99.35
2633	98.9	99.29	99.48	99.35
2632	98.9	99.28	99.48	99.35
2631	98.9	99.28	99.48	99.35
2630	98.9	99.28	99.48	99.35
2629	98.9	99.28	99.48	99.35
2628	98.9	99.28	99.48	99.35
2627	98.91	99.28	99.48	99.35
2626	98.91	99.28	99.48	99.35
2625	98.91	99.28	99.48	99.35
2624	98.91	99.28	99.48	99.35
2623	98.91	99.28	99.48	99.36
2622	98.91	99.29	99.48	99.36
2621	98.91	99.29	99.48	99.36
2620	98.91	99.29	99.48	99.36
2619	98.91	99.29	99.48	99.36
2618	98.91	99.29	99.48	99.36
2617	98.91	99.29	99.48	99.36
2616	98.91	99.29	99.48	99.36
2615	98.9	99.29	99.48	99.36
2614	98.9	99.29	99.48	99.36
2613	98.9	99.29	99.48	99.36
2612	98.9	99.29	99.48	99.36
2611	98.9	99.29	99.48	99.36
2610	98.9	99.29	99.48	99.36
2609	98.9	99.29	99.48	99.36
2608	98.89	99.29	99.48	99.36
2607	98.89	99.29	99.48	99.36
2606	98.89	99.29	99.48	99.36
2605	98.89	99.29	99.47	99.36
2604	98.89	99.29	99.47	99.35
2603	98.89	99.29	99.47	99.35
2602	98.88	99.29	99.47	99.35
2601	98.88	99.29	99.47	99.35
2600	98.88	99.29	99.47	99.35
2599	98.88	99.29	99.47	99.35
2598	98.88	99.29	99.47	99.35
2597	98.88	99.29	99.47	99.35
2596	98.88	99.29	99.47	99.35
2595	98.88	99.29	99.47	99.35
2594	98.88	99.29	99.47	99.35
2593	98.88	99.29	99.47	99.35
2592	98.88	99.3	99.47	99.35
2591	98.88	99.3	99.47	99.35
2590	98.88	99.3	99.47	99.35
2589	98.88	99.3	99.47	99.35
2588	98.88	99.3	99.47	99.34
2587	98.89	99.3	99.47	99.34
2586	98.89	99.3	99.47	99.34
2585	98.89	99.3	99.47	99.34
2584	98.89	99.3	99.47	99.34
2583	98.9	99.3	99.47	99.34
2582	98.9	99.3	99.47	99.34
2581	98.9	99.3	99.47	99.34
2580	98.91	99.3	99.47	99.34
2579	98.91	99.3	99.47	99.34
2578	98.91	99.3	99.47	99.33
2577	98.91	99.3	99.47	99.33
2576	98.91	99.3	99.47	99.33
2575	98.91	99.3	99.47	99.33
2574	98.92	99.3	99.47	99.33
2573	98.92	99.3	99.47	99.33
2572	98.92	99.31	99.47	99.33
2571	98.92	99.31	99.48	99.33
2570	98.92	99.31	99.48	99.33
2569	98.92	99.31	99.48	99.33
2568	98.92	99.31	99.48	99.33
2567	98.92	99.31	99.48	99.32
2566	98.92	99.31	99.48	99.32
2565	98.92	99.31	99.48	99.32
2564	98.92	99.31	99.48	99.32
2563	98.92	99.31	99.48	99.32
2562	98.92	99.31	99.48	99.32
2561	98.92	99.31	99.48	99.32
2560	98.92	99.31	99.48	99.32
2559	98.92	99.31	99.48	99.32
2558	98.92	99.31	99.48	99.32
2557	98.92	99.31	99.48	99.32
2556	98.92	99.31	99.48	99.32
2555	98.92	99.31	99.48	99.32
2554	98.92	99.31	99.48	99.32
2553	98.92	99.31	99.48	99.32
2552	98.92	99.31	99.48	99.32
2551	98.92	99.31	99.48	99.32
2550	98.92	99.31	99.48	99.32
2549	98.92	99.31	99.48	99.32
2548	98.92	99.31	99.48	99.32
2547	98.91	99.31	99.48	99.32
2546	98.91	99.31	99.48	99.32
2545	98.91	99.32	99.47	99.32
2544	98.9	99.31	99.47	99.32
2543	98.9	99.31	99.47	99.32
2542	98.9	99.31	99.47	99.32
2541	98.9	99.32	99.47	99.32
2540	98.9	99.32	99.47	99.32
2539	98.9	99.32	99.47	99.32
2538	98.9	99.32	99.47	99.32
2537	98.9	99.31	99.47	99.32
2536	98.9	99.3	99.47	99.32
2535	98.9	99.3	99.46	99.32
2534	98.9	99.3	99.46	99.32
2533	98.9	99.3	99.46	99.32
2532	98.9	99.3	99.46	99.32
2531	98.9	99.31	99.46	99.32
2530	98.91	99.3	99.46	99.32
2529	98.91	99.29	99.46	99.32
2528	98.91	99.28	99.46	99.32
2527	98.91	99.26	99.45	99.32
2526	98.91	99.26	99.45	99.32
2525	98.91	99.26	99.45	99.32
2524	98.91	99.26	99.45	99.33
2523	98.91	99.27	99.45	99.33
2522	98.91	99.27	99.45	99.33
2521	98.91	99.27	99.45	99.33
2520	98.91	99.27	99.45	99.33
2519	98.91	99.26	99.45	99.33
2518	98.91	99.26	99.44	99.33
2517	98.91	99.26	99.44	99.33
2516	98.91	99.26	99.44	99.33
2515	98.91	99.28	99.44	99.33
2514	98.92	99.29	99.44	99.33
2513	98.92	99.31	99.45	99.33
2512	98.92	99.31	99.45	99.33
2511	98.92	99.32	99.45	99.33
2510	98.92	99.32	99.45	99.33
2509	98.92	99.32	99.45	99.33
2508	98.92	99.32	99.45	99.33
2507	98.92	99.31	99.45	99.33
2506	98.92	99.31	99.45	99.33
2505	98.92	99.29	99.45	99.33
2504	98.92	99.29	99.45	99.33
2503	98.92	99.29	99.45	99.33
2502	98.92	99.29	99.45	99.34
2501	98.92	99.29	99.45	99.34
2500	98.92	99.28	99.45	99.34
2499	98.91	99.28	99.45	99.34
2498	98.91	99.29	99.45	99.34
2497	98.91	99.31	99.45	99.34
2496	98.91	99.32	99.46	99.34
2495	98.91	99.33	99.46	99.34
2494	98.91	99.34	99.46	99.34
2493	98.91	99.34	99.46	99.34
2492	98.91	99.34	99.46	99.34
2491	98.91	99.34	99.46	99.34
2490	98.91	99.34	99.46	99.34
2489	98.91	99.33	99.47	99.34
2488	98.92	99.32	99.47	99.34
2487	98.92	99.31	99.47	99.34
2486	98.92	99.31	99.47	99.34
2485	98.92	99.31	99.47	99.34
2484	98.92	99.32	99.47	99.34
2483	98.92	99.33	99.47	99.34
2482	98.92	99.33	99.47	99.34
2481	98.93	99.32	99.47	99.34
2480	98.93	99.32	99.48	99.34
2479	98.93	99.32	99.48	99.34
2478	98.92	99.32	99.48	99.34
2477	98.92	99.32	99.48	99.34
2476	98.92	99.31	99.48	99.34
2475	98.92	99.3	99.48	99.34
2474	98.92	99.29	99.48	99.34
2473	98.92	99.28	99.48	99.34
2472	98.92	99.27	99.48	99.34
2471	98.92	99.27	99.48	99.34
2470	98.92	99.27	99.48	99.34
2469	98.92	99.27	99.48	99.34
2468	98.92	99.28	99.48	99.34
2467	98.92	99.29	99.48	99.34
2466	98.92	99.29	99.48	99.34
2465	98.92	99.3	99.48	99.34
2464	98.92	99.3	99.48	99.34
2463	98.92	99.3	99.48	99.34
2462	98.92	99.3	99.48	99.34
2461	98.92	99.29	99.48	99.34
2460	98.92	99.29	99.49	99.34
2459	98.92	99.28	99.49	99.34
2458	98.92	99.28	99.49	99.34
2457	98.92	99.29	99.49	99.34
2456	98.92	99.29	99.49	99.34
2455	98.92	99.29	99.49	99.34
2454	98.92	99.29	99.49	99.34
2453	98.92	99.29	99.49	99.34
2452	98.92	99.29	99.49	99.34
2451	98.92	99.29	99.49	99.34
2450	98.92	99.29	99.49	99.34
2449	98.92	99.29	99.49	99.35
2448	98.93	99.3	99.49	99.35
2447	98.93	99.3	99.49	99.34
2446	98.93	99.3	99.49	99.34
2445	98.93	99.3	99.49	99.34
2444	98.94	99.3	99.49	99.34
2443	98.94	99.29	99.49	99.34
2442	98.94	99.3	99.49	99.35
2441	98.94	99.3	99.49	99.35
2440	98.95	99.31	99.49	99.35
2439	98.95	99.31	99.5	99.35
2438	98.95	99.31	99.5	99.35
2437	98.95	99.32	99.5	99.35
2436	98.95	99.32	99.5	99.35
2435	98.95	99.32	99.5	99.35
2434	98.95	99.33	99.5	99.34
2433	98.95	99.34	99.5	99.34
2432	98.95	99.34	99.5	99.34
2431	98.96	99.33	99.5	99.35
2430	98.96	99.32	99.5	99.35
2429	98.96	99.32	99.5	99.35
2428	98.96	99.32	99.5	99.35
2427	98.96	99.32	99.5	99.35
2426	98.96	99.32	99.5	99.35
2425	98.95	99.32	99.5	99.35
2424	98.95	99.32	99.5	99.35
2423	98.95	99.32	99.5	99.35
2422	98.95	99.32	99.51	99.35
2421	98.95	99.32	99.51	99.34
2420	98.95	99.33	99.51	99.34
2419	98.95	99.33	99.51	99.34
2418	98.95	99.33	99.51	99.34
2417	98.95	99.33	99.51	99.34
2416	98.95	99.33	99.51	99.34
2415	98.96	99.33	99.51	99.35
2414	98.96	99.34	99.51	99.35
2413	98.96	99.34	99.51	99.35
2412	98.96	99.34	99.51	99.35
2411	98.96	99.34	99.51	99.35
2410	98.96	99.33	99.51	99.34
2409	98.96	99.32	99.51	99.35
2408	98.96	99.31	99.51	99.34
2407	98.96	99.31	99.51	99.34
2406	98.96	99.32	99.51	99.35
2405	98.96	99.33	99.51	99.35
2404	98.95	99.33	99.51	99.36
2403	98.95	99.33	99.51	99.36
2402	98.95	99.34	99.51	99.37
2401	98.95	99.34	99.51	99.37
2400	98.94	99.34	99.51	99.37
2399	98.94	99.34	99.51	99.36
2398	98.94	99.34	99.51	99.36
2397	98.94	99.35	99.52	99.36
2396	98.94	99.35	99.52	99.36
2395	98.93	99.35	99.52	99.36
2394	98.93	99.35	99.52	99.36
2393	98.93	99.35	99.52	99.36
2392	98.93	99.36	99.52	99.37
2391	98.94	99.36	99.52	99.37
2390	98.94	99.36	99.52	99.37
2389	98.94	99.37	99.52	99.38
2388	98.94	99.37	99.53	99.38
2387	98.95	99.37	99.53	99.38
2386	98.95	99.37	99.53	99.38
2385	98.96	99.36	99.53	99.39
2384	98.96	99.36	99.53	99.39
2383	98.96	99.36	99.53	99.39
2382	98.97	99.36	99.54	99.4
2381	98.97	99.37	99.54	99.4
2380	98.97	99.38	99.54	99.4
2379	98.98	99.4	99.54	99.4
2378	98.98	99.42	99.54	99.41
2377	98.98	99.43	99.55	99.41
2376	98.98	99.43	99.55	99.41
2375	98.99	99.44	99.55	99.42
2374	98.99	99.44	99.55	99.42
2373	98.99	99.45	99.55	99.42
2372	98.98	99.44	99.56	99.43
2371	98.98	99.43	99.56	99.43
2370	98.98	99.43	99.56	99.44
2369	98.98	99.43	99.56	99.44
2368	98.98	99.43	99.56	99.44
2367	98.98	99.43	99.56	99.45
2366	98.98	99.44	99.56	99.45
2365	98.98	99.44	99.56	99.45
2364	98.98	99.44	99.56	99.46
2363	98.98	99.45	99.57	99.46
2362	98.98	99.46	99.57	99.46
2361	98.98	99.48	99.56	99.46
2360	98.99	99.49	99.56	99.46
2359	98.99	99.49	99.56	99.47
2358	98.99	99.48	99.56	99.47
2357	99	99.46	99.56	99.47
2356	99.01	99.45	99.56	99.47
2355	99.01	99.46	99.55	99.48
2354	99.01	99.47	99.55	99.48
2353	99.02	99.5	99.55	99.48
2352	99.02	99.51	99.55	99.48
2351	99.01	99.51	99.55	99.48
2350	99.01	99.49	99.54	99.48
2349	99.01	99.47	99.54	99.49
2348	99.01	99.46	99.53	99.49
2347	99.01	99.46	99.53	99.49
2346	99.01	99.45	99.53	99.49
2345	99.01	99.42	99.52	99.49
2344	99	99.39	99.52	99.49
2343	99	99.38	99.51	99.49
2342	99	99.39	99.51	99.48
2341	99	99.42	99.5	99.48
2340	99	99.44	99.49	99.48
2339	98.99	99.47	99.49	99.48
2338	98.99	99.48	99.48	99.48
2337	98.99	99.5	99.48	99.48
2336	98.99	99.51	99.47	99.48
2335	98.99	99.51	99.46	99.48
2334	98.98	99.51	99.46	99.47
2333	98.98	99.52	99.45	99.47
2332	98.97	99.51	99.44	99.47
2331	98.96	99.48	99.44	99.47
2330	98.95	99.42	99.43	99.46
2329	98.94	99.36	99.42	99.46
2328	98.94	99.32	99.42	99.46
2327	98.92	99.3	99.41	99.45
2326	98.91	99.31	99.41	99.45
2325	98.9	99.32	99.4	99.44
2324	98.9	99.33	99.4	99.44
2323	98.89	99.33	99.39	99.44
2322	98.88	99.32	99.39	99.43
2321	98.88	99.29	99.38	99.43
2320	98.87	99.26	99.38	99.42
2319	98.87	99.23	99.37	99.42
2318	98.87	99.23	99.37	99.42
2317	98.86	99.25	99.37	99.41
2316	98.86	99.26	99.37	99.41
2315	98.86	99.27	99.37	99.41
2314	98.85	99.27	99.37	99.4
2313	98.85	99.26	99.36	99.4
2312	98.85	99.25	99.36	99.39
2311	98.85	99.23	99.36	99.39
2310	98.85	99.21	99.35	99.39
2309	98.85	99.2	99.35	99.38
2308	98.84	99.2	99.36	99.38
2307	98.84	99.2	99.36	99.37
2306	98.84	99.21	99.36	99.36
2305	98.84	99.2	99.36	99.36
2304	98.84	99.19	99.36	99.35
2303	98.84	99.19	99.36	99.35
2302	98.84	99.2	99.36	99.35
2301	98.84	99.21	99.37	99.34
2300	98.85	99.21	99.37	99.34
2299	98.85	99.2	99.37	99.33
2298	98.85	99.19	99.37	99.33
2297	98.85	99.19	99.38	99.32
2296	98.86	99.19	99.38	99.32
2295	98.86	99.21	99.38	99.31
2294	98.86	99.22	99.39	99.31
2293	98.86	99.23	99.39	99.31
2292	98.87	99.23	99.4	99.3
2291	98.87	99.23	99.4	99.3
2290	98.87	99.24	99.4	99.29
2289	98.86	99.25	99.41	99.29
2288	98.86	99.26	99.41	99.29
2287	98.86	99.26	99.42	99.28
2286	98.86	99.26	99.42	99.28
2285	98.86	99.25	99.42	99.28
2284	98.86	99.26	99.43	99.28
2283	98.86	99.27	99.43	99.27
2282	98.86	99.28	99.43	99.27
2281	98.86	99.29	99.44	99.27
2280	98.86	99.3	99.44	99.27
2279	98.86	99.3	99.44	99.27
2278	98.87	99.3	99.45	99.26
2277	98.87	99.3	99.45	99.26
2276	98.88	99.31	99.45	99.26
2275	98.88	99.33	99.46	99.26
2274	98.89	99.34	99.46	99.26
2273	98.9	99.34	99.46	99.26
2272	98.91	99.34	99.47	99.25
2271	98.92	99.33	99.47	99.25
2270	98.92	99.32	99.47	99.25
2269	98.93	99.32	99.47	99.25
2268	98.94	99.31	99.48	99.25
2267	98.94	99.31	99.48	99.25
2266	98.95	99.31	99.48	99.25
2265	98.95	99.32	99.48	99.25
2264	98.95	99.33	99.48	99.25
2263	98.95	99.33	99.49	99.25
2262	98.95	99.34	99.49	99.25
2261	98.95	99.35	99.49	99.25
2260	98.94	99.35	99.49	99.25
2259	98.94	99.35	99.49	99.25
2258	98.93	99.35	99.5	99.25
2257	98.92	99.36	99.5	99.25
2256	98.91	99.36	99.5	99.25
2255	98.9	99.36	99.5	99.25
2254	98.89	99.37	99.5	99.25
2253	98.89	99.37	99.5	99.25
2252	98.88	99.37	99.5	99.25
2251	98.88	99.37	99.5	99.25
2250	98.87	99.37	99.5	99.25
2249	98.87	99.37	99.5	99.25
2248	98.87	99.37	99.51	99.25
2247	98.87	99.37	99.51	99.25
2246	98.86	99.37	99.51	99.25
2245	98.86	99.38	99.51	99.25
2244	98.86	99.38	99.51	99.25
2243	98.86	99.38	99.51	99.25
2242	98.86	99.38	99.51	99.25
2241	98.86	99.38	99.51	99.25
2240	98.87	99.38	99.51	99.24
2239	98.87	99.38	99.51	99.24
2238	98.87	99.38	99.51	99.24
2237	98.87	99.38	99.51	99.24
2236	98.86	99.38	99.51	99.24
2235	98.86	99.37	99.51	99.24
2234	98.87	99.37	99.51	99.23
2233	98.87	99.37	99.51	99.23
2232	98.87	99.37	99.51	99.23
2231	98.88	99.37	99.51	99.23
2230	98.88	99.37	99.51	99.23
2229	98.89	99.36	99.51	99.22
2228	98.89	99.36	99.51	99.22
2227	98.9	99.36	99.51	99.22
2226	98.9	99.36	99.5	99.22
2225	98.91	99.36	99.5	99.21
2224	98.92	99.36	99.5	99.21
2223	98.92	99.36	99.5	99.21
2222	98.93	99.35	99.5	99.21
2221	98.94	99.35	99.5	99.2
2220	98.95	99.35	99.5	99.2
2219	98.95	99.35	99.5	99.2
2218	98.96	99.35	99.5	99.2
2217	98.96	99.34	99.5	99.19
2216	98.96	99.34	99.49	99.19
2215	98.97	99.34	99.49	99.19
2214	98.97	99.34	99.49	99.19
2213	98.97	99.34	99.49	99.18
2212	98.98	99.34	99.49	99.18
2211	98.98	99.34	99.49	99.18
2210	98.98	99.33	99.49	99.18
2209	98.98	99.33	99.49	99.18
2208	98.98	99.33	99.48	99.18
2207	98.98	99.33	99.48	99.18
2206	98.98	99.33	99.48	99.18
2205	98.98	99.33	99.48	99.17
2204	98.98	99.33	99.48	99.17
2203	98.98	99.32	99.48	99.17
2202	98.98	99.32	99.47	99.17
2201	98.98	99.32	99.47	99.17
2200	98.97	99.32	99.47	99.17
2199	98.97	99.31	99.47	99.17
2198	98.97	99.31	99.47	99.17
2197	98.97	99.31	99.47	99.17
2196	98.97	99.31	99.47	99.17
2195	98.97	99.31	99.47	99.18
2194	98.96	99.31	99.47	99.18
2193	98.96	99.31	99.47	99.18
2192	98.95	99.31	99.47	99.18
2191	98.95	99.31	99.47	99.18
2190	98.95	99.32	99.47	99.19
2189	98.94	99.31	99.48	99.19
2188	98.94	99.31	99.48	99.19
2187	98.94	99.32	99.48	99.2
2186	98.94	99.32	99.48	99.2
2185	98.94	99.33	99.49	99.2
2184	98.94	99.33	99.49	99.21
2183	98.93	99.33	99.49	99.21
2182	98.93	99.33	99.5	99.22
2181	98.92	99.33	99.5	99.22
2180	98.92	99.34	99.5	99.23
2179	98.91	99.34	99.51	99.23
2178	98.91	99.35	99.51	99.24
2177	98.91	99.35	99.51	99.24
2176	98.9	99.35	99.52	99.25
2175	98.9	99.35	99.52	99.26
2174	98.89	99.36	99.53	99.26
2173	98.88	99.37	99.53	99.27
2172	98.87	99.37	99.53	99.27
2171	98.87	99.37	99.54	99.28
2170	98.86	99.37	99.54	99.29
2169	98.86	99.38	99.55	99.29
2168	98.86	99.39	99.55	99.3
2167	98.86	99.39	99.56	99.31
2166	98.86	99.39	99.56	99.31
2165	98.86	99.38	99.57	99.32
2164	98.87	99.36	99.57	99.33
2163	98.88	99.36	99.58	99.33
2162	98.88	99.34	99.59	99.34
2161	98.89	99.33	99.59	99.34
2160	98.91	99.33	99.6	99.35
2159	98.92	99.36	99.61	99.36
2158	98.93	99.4	99.62	99.36
2157	98.94	99.43	99.62	99.37
2156	98.96	99.44	99.63	99.37
2155	98.97	99.45	99.63	99.38
2154	98.98	99.48	99.64	99.38
2153	98.99	99.5	99.64	99.38
2152	99	99.52	99.65	99.39
2151	99.01	99.51	99.65	99.39
2150	99.02	99.49	99.65	99.39
2149	99.02	99.48	99.66	99.39
2148	99.03	99.47	99.66	99.4
2147	99.03	99.48	99.66	99.4
2146	99.03	99.48	99.66	99.4
2145	99.03	99.48	99.67	99.4
2144	99.03	99.46	99.67	99.4
2143	99.03	99.44	99.67	99.4
2142	99.02	99.43	99.67	99.41
2141	99.02	99.43	99.67	99.41
2140	99.02	99.44	99.67	99.41
2139	99.01	99.46	99.67	99.41
2138	99.01	99.47	99.67	99.41
2137	99	99.47	99.67	99.41
2136	99	99.48	99.67	99.4
2135	99	99.49	99.67	99.4
2134	99	99.5	99.67	99.4
2133	99	99.5	99.67	99.4
2132	99	99.49	99.67	99.4
2131	99	99.48	99.67	99.4
2130	99	99.47	99.67	99.39
2129	99	99.47	99.67	99.39
2128	99	99.47	99.67	99.39
2127	99.01	99.48	99.67	99.39
2126	99	99.47	99.67	99.38
2125	99	99.47	99.66	99.38
2124	99	99.45	99.66	99.38
2123	99	99.44	99.66	99.37
2122	99	99.44	99.66	99.37
2121	98.99	99.43	99.65	99.37
2120	98.99	99.43	99.65	99.36
2119	98.98	99.43	99.65	99.36
2118	98.97	99.43	99.64	99.36
2117	98.97	99.43	99.64	99.35
2116	98.96	99.43	99.63	99.35
2115	98.95	99.42	99.63	99.35
2114	98.95	99.42	99.63	99.34
2113	98.94	99.41	99.62	99.34
2112	98.94	99.41	99.62	99.34
2111	98.94	99.41	99.62	99.34
2110	98.93	99.41	99.61	99.34
2109	98.93	99.41	99.61	99.33
2108	98.93	99.41	99.61	99.33
2107	98.93	99.41	99.6	99.33
2106	98.93	99.41	99.6	99.33
2105	98.93	99.41	99.6	99.33
2104	98.93	99.41	99.59	99.32
2103	98.93	99.4	99.59	99.32
2102	98.93	99.4	99.59	99.32
2101	98.94	99.4	99.58	99.31
2100	98.94	99.4	99.58	99.31
2099	98.94	99.41	99.58	99.31
2098	98.95	99.41	99.58	99.31
2097	98.95	99.41	99.58	99.3
2096	98.95	99.41	99.58	99.3
2095	98.96	99.41	99.58	99.3
2094	98.96	99.41	99.57	99.3
2093	98.96	99.41	99.57	99.3
2092	98.96	99.41	99.57	99.3
2091	98.96	99.41	99.57	99.3
2090	98.96	99.41	99.57	99.29
2089	98.96	99.41	99.57	99.29
2088	98.96	99.41	99.56	99.29
2087	98.95	99.41	99.56	99.29
2086	98.95	99.42	99.56	99.29
2085	98.95	99.42	99.56	99.29
2084	98.94	99.42	99.56	99.29
2083	98.94	99.42	99.56	99.29
2082	98.94	99.42	99.56	99.29
2081	98.94	99.42	99.56	99.28
2080	98.94	99.42	99.56	99.28
2079	98.94	99.42	99.56	99.28
2078	98.94	99.43	99.56	99.28
2077	98.94	99.43	99.56	99.28
2076	98.94	99.43	99.56	99.27
2075	98.94	99.43	99.56	99.27
2074	98.94	99.43	99.56	99.27
2073	98.94	99.43	99.56	99.27
2072	98.94	99.44	99.56	99.26
2071	98.94	99.44	99.56	99.26
2070	98.94	99.44	99.56	99.26
2069	98.93	99.44	99.56	99.26
2068	98.93	99.44	99.56	99.26
2067	98.92	99.45	99.57	99.25
2066	98.92	99.45	99.57	99.25
2065	98.91	99.45	99.57	99.25
2064	98.91	99.45	99.58	99.25
2063	98.91	99.45	99.58	99.25
2062	98.91	99.46	99.58	99.26
2061	98.91	99.46	99.58	99.27
2060	98.91	99.46	99.59	99.27
2059	98.91	99.46	99.59	99.27
2058	98.91	99.46	99.59	99.27
2057	98.91	99.47	99.6	99.28
2056	98.91	99.47	99.6	99.29
2055	98.92	99.47	99.6	99.29
2054	98.92	99.47	99.61	99.28
2053	98.92	99.47	99.61	99.28
2052	98.92	99.47	99.61	99.27
2051	98.92	99.47	99.62	99.26
2050	98.91	99.47	99.62	99.25
2049	98.91	99.48	99.62	99.26
2048	98.9	99.47	99.63	99.26
2047	98.89	99.47	99.63	99.27
2046	98.89	99.46	99.63	99.26
2045	98.88	99.46	99.63	99.26
2044	98.88	99.46	99.64	99.26
2043	98.88	99.46	99.64	99.27
2042	98.88	99.47	99.64	99.27
2041	98.88	99.48	99.64	99.25
2040	98.88	99.48	99.64	99.23
2039	98.88	99.49	99.64	99.23
2038	98.88	99.5	99.64	99.24
2037	98.89	99.5	99.64	99.25
2036	98.89	99.5	99.65	99.25
2035	98.9	99.48	99.65	99.26
2034	98.91	99.47	99.66	99.28
2033	98.92	99.46	99.67	99.3
2032	98.93	99.46	99.67	99.31
2031	98.93	99.46	99.67	99.33
2030	98.94	99.46	99.68	99.34
2029	98.94	99.47	99.69	99.36
2028	98.94	99.48	99.7	99.36
2027	98.95	99.48	99.71	99.35
2026	98.95	99.48	99.71	99.34
2025	98.95	99.46	99.7	99.34
2024	98.96	99.44	99.68	99.35
2023	98.96	99.42	99.66	99.35
2022	98.96	99.41	99.65	99.34
2021	98.96	99.41	99.65	99.34
2020	98.96	99.43	99.66	99.34
2019	98.97	99.44	99.67	99.34
2018	98.97	99.44	99.67	99.33
2017	98.98	99.43	99.67	99.33
2016	98.99	99.42	99.66	99.33
2015	98.99	99.4	99.66	99.34
2014	99	99.4	99.66	99.34
2013	99.01	99.39	99.66	99.34
2012	99.01	99.38	99.65	99.34
2011	99.02	99.36	99.65	99.34
2010	99.03	99.35	99.64	99.34
2009	99.04	99.34	99.64	99.34
2008	99.04	99.33	99.64	99.34
2007	99.04	99.32	99.63	99.34
2006	99.04	99.31	99.63	99.34
2005	99.04	99.3	99.62	99.34
2004	99.03	99.29	99.61	99.34
2003	99.03	99.29	99.61	99.34
[truncated: 1,353 more rows]

## Sheet: Fig. 2h
x-axis-Wavenumber (cm‒1)	y-axis-Transmittance (a.u.)
	P-PLA	MRSD-PLA2	MRSD-PLA4	MRSD-PLA6
1500	99.11	99.58	99.86	99.4
1499	99.11	99.55	99.86	99.38
1498	99.12	99.55	99.86	99.37
1497	99.12	99.58	99.85	99.38
1496	99.12	99.62	99.84	99.41
1495	99.12	99.66	99.82	99.42
1494	99.13	99.68	99.81	99.39
1493	99.13	99.68	99.79	99.38
1492	99.13	99.65	99.78	99.39
1491	99.13	99.6	99.78	99.43
1490	99.13	99.55	99.79	99.42
1489	99.13	99.52	99.79	99.38
1488	99.13	99.48	99.77	99.36
1487	99.12	99.45	99.76	99.35
1486	99.12	99.44	99.75	99.35
1485	99.12	99.46	99.77	99.33
1484	99.11	99.5	99.82	99.31
1483	99.1	99.53	99.86	99.3
1482	99.09	99.54	99.87	99.29
1481	99.08	99.52	99.86	99.26
1480	99.07	99.5	99.83	99.21
1479	99.05	99.48	99.78	99.2
1478	99.03	99.47	99.71	99.22
1477	99.01	99.45	99.64	99.27
1476	98.98	99.41	99.55	99.28
1475	98.94	99.34	99.49	99.23
1474	98.9	99.26	99.43	99.16
1473	98.84	99.15	99.38	99.11
1472	98.78	99.05	99.32	99.07
1471	98.71	98.96	99.26	99.02
1470	98.63	98.88	99.17	98.96
1469	98.54	98.79	99.07	98.9
1468	98.45	98.68	98.95	98.85
1467	98.34	98.55	98.8	98.77
1466	98.23	98.39	98.61	98.61
1465	98.11	98.15	98.36	98.39
1464	97.99	97.88	98.07	98.19
1463	97.87	97.62	97.8	98.04
1462	97.75	97.38	97.55	97.92
1461	97.64	97.15	97.3	97.78
1460	97.53	96.94	97.05	97.65
1459	97.43	96.73	96.79	97.55
1458	97.34	96.55	96.54	97.48
1457	97.26	96.41	96.35	97.36
1456	97.2	96.34	96.28	97.23
1455	97.15	96.29	96.26	97.15
1454	97.13	96.26	96.25	97.14
1453	97.12	96.25	96.23	97.16
1452	97.13	96.26	96.22	97.2
1451	97.15	96.3	96.25	97.25
1450	97.19	96.35	96.33	97.31
1449	97.25	96.46	96.48	97.41
1448	97.32	96.63	96.7	97.51
1447	97.4	96.85	96.97	97.62
1446	97.5	97.08	97.23	97.74
1445	97.6	97.32	97.48	97.9
1444	97.7	97.55	97.72	98.09
1443	97.81	97.79	97.95	98.26
1442	97.92	98.02	98.19	98.38
1441	98.03	98.22	98.41	98.49
1440	98.13	98.42	98.61	98.61
1439	98.23	98.59	98.79	98.74
1438	98.33	98.74	98.94	98.82
1437	98.42	98.85	99.07	98.85
1436	98.5	98.91	99.16	98.88
1435	98.57	98.93	99.21	98.93
1434	98.63	98.95	99.23	99
1433	98.69	98.98	99.25	99.04
1432	98.74	99.02	99.3	99.05
1431	98.78	99.05	99.37	99.07
1430	98.81	99.07	99.45	99.11
1429	98.84	99.09	99.52	99.14
1428	98.87	99.13	99.57	99.14
1427	98.89	99.17	99.59	99.11
1426	98.91	99.2	99.58	99.09
1425	98.93	99.22	99.55	99.11
1424	98.94	99.23	99.54	99.14
1423	98.95	99.23	99.54	99.16
1422	98.96	99.24	99.56	99.19
1421	98.97	99.26	99.59	99.24
1420	98.98	99.28	99.61	99.29
1419	98.98	99.28	99.62	99.28
1418	98.99	99.26	99.6	99.21
1417	99	99.26	99.6	99.17
1416	99.01	99.26	99.6	99.18
1415	99.01	99.27	99.61	99.22
1414	99.01	99.3	99.62	99.25
1413	99.01	99.32	99.64	99.24
1412	99.01	99.32	99.66	99.23
1411	99.01	99.31	99.68	99.25
1410	99.01	99.29	99.69	99.28
1409	99	99.29	99.68	99.29
1408	98.99	99.29	99.66	99.27
1407	98.98	99.27	99.61	99.24
1406	98.97	99.23	99.55	99.22
1405	98.95	99.2	99.51	99.21
1404	98.92	99.19	99.5	99.19
1403	98.89	99.16	99.5	99.18
1402	98.85	99.13	99.49	99.18
1401	98.81	99.09	99.46	99.18
1400	98.75	99.06	99.39	99.15
1399	98.69	99.01	99.29	99.07
1398	98.63	98.96	99.19	99.01
1397	98.55	98.9	99.09	98.98
1396	98.47	98.79	98.98	98.97
1395	98.38	98.65	98.83	98.89
1394	98.28	98.47	98.66	98.76
1393	98.18	98.3	98.48	98.64
1392	98.08	98.11	98.3	98.54
1391	97.98	97.9	98.08	98.44
1390	97.89	97.68	97.83	98.32
1389	97.79	97.46	97.55	98.18
1388	97.71	97.25	97.29	98.03
1387	97.63	97.06	97.08	97.91
1386	97.56	96.92	96.95	97.8
1385	97.5	96.81	96.86	97.69
1384	97.45	96.75	96.81	97.6
1383	97.41	96.73	96.77	97.56
1382	97.38	96.74	96.77	97.58
1381	97.36	96.79	96.8	97.63
1380	97.35	96.87	96.88	97.67
1379	97.34	96.99	97	97.73
1378	97.34	97.13	97.15	97.82
1377	97.34	97.27	97.31	97.94
1376	97.35	97.35	97.45	98.05
1375	97.35	97.38	97.51	98.09
1374	97.35	97.34	97.49	98.06
1373	97.35	97.29	97.41	97.99
1372	97.34	97.23	97.3	97.9
1371	97.34	97.16	97.19	97.79
1370	97.32	97.08	97.09	97.69
1369	97.31	97	97.03	97.63
1368	97.29	96.94	96.99	97.62
1367	97.28	96.9	96.97	97.63
1366	97.26	96.88	96.96	97.63
1365	97.25	96.84	96.93	97.63
1364	97.24	96.81	96.87	97.65
1363	97.23	96.78	96.8	97.67
1362	97.23	96.77	96.76	97.66
1361	97.23	96.76	96.76	97.63
1360	97.24	96.77	96.81	97.61
1359	97.25	96.78	96.87	97.61
1358	97.27	96.81	96.93	97.64
1357	97.3	96.87	97	97.67
1356	97.33	96.93	97.07	97.7
1355	97.37	97.01	97.14	97.74
1354	97.41	97.1	97.2	97.82
1353	97.46	97.2	97.28	97.91
1352	97.51	97.29	97.38	97.96
1351	97.56	97.37	97.49	97.97
1350	97.61	97.45	97.62	97.98
1349	97.67	97.54	97.73	98.03
1348	97.72	97.65	97.83	98.09
1347	97.78	97.77	97.91	98.14
1346	97.83	97.87	97.97	98.18
1345	97.88	97.94	98.02	98.23
1344	97.93	97.98	98.07	98.28
1343	97.97	98.01	98.11	98.32
1342	98.01	98.05	98.15	98.34
1341	98.05	98.1	98.2	98.38
1340	98.09	98.15	98.24	98.43
1339	98.12	98.16	98.27	98.48
1338	98.15	98.17	98.29	98.5
1337	98.18	98.2	98.33	98.49
1336	98.2	98.26	98.37	98.47
1335	98.23	98.31	98.41	98.48
1334	98.25	98.34	98.45	98.49
1333	98.26	98.34	98.49	98.49
1332	98.28	98.35	98.54	98.47
1331	98.29	98.36	98.58	98.47
1330	98.31	98.37	98.59	98.5
1329	98.32	98.36	98.59	98.53
1328	98.33	98.37	98.59	98.55
1327	98.34	98.38	98.6	98.55
1326	98.35	98.41	98.62	98.56
1325	98.35	98.43	98.63	98.58
1324	98.36	98.43	98.64	98.59
1323	98.36	98.41	98.65	98.58
1322	98.36	98.39	98.68	98.57
1321	98.36	98.39	98.69	98.58
1320	98.36	98.4	98.67	98.61
1319	98.35	98.42	98.63	98.61
1318	98.35	98.41	98.58	98.58
1317	98.35	98.4	98.56	98.55
1316	98.34	98.37	98.57	98.55
1315	98.34	98.35	98.59	98.57
1314	98.34	98.33	98.6	98.56
1313	98.33	98.3	98.59	98.52
1312	98.33	98.28	98.56	98.48
1311	98.32	98.28	98.51	98.47
1310	98.32	98.29	98.49	98.47
1309	98.32	98.31	98.49	98.46
1308	98.32	98.33	98.51	98.45
1307	98.32	98.33	98.52	98.45
1306	98.32	98.29	98.51	98.48
1305	98.32	98.25	98.5	98.5
1304	98.32	98.23	98.49	98.51
1303	98.33	98.24	98.49	98.5
1302	98.33	98.28	98.49	98.51
1301	98.34	98.33	98.52	98.53
1300	98.34	98.36	98.55	98.53

## Sheet: Fig. 2i
x-axis-Wavenumber (cm‒1)	y-axis-Transmittance (a.u.)
	P-PLA	MRSD-PLA2	MRSD-PLA4	MRSD-PLA6
1250	97.65	97.27	97.44	97.83
1249	97.67	97.29	97.38	97.86
1248	97.68	97.31	97.35	97.88
1247	97.68	97.31	97.37	97.87
1246	97.68	97.32	97.45	97.84
1245	97.68	97.34	97.54	97.83
1244	97.67	97.37	97.56	97.85
1243	97.65	97.37	97.5	97.83
1242	97.62	97.32	97.38	97.77
1241	97.59	97.24	97.23	97.71
1240	97.56	97.16	97.09	97.67
1239	97.51	97.09	96.98	97.64
1238	97.46	97.02	96.91	97.59
1237	97.4	96.94	96.89	97.5
1236	97.34	96.85	96.87	97.41
1235	97.26	96.72	96.81	97.35
1234	97.18	96.59	96.69	97.28
1233	97.09	96.45	96.53	97.18
1232	96.98	96.34	96.34	97.06
1231	96.88	96.24	96.16	96.95
1230	96.76	96.09	95.97	96.86
1229	96.63	95.88	95.77	96.77
1228	96.49	95.64	95.56	96.63
1227	96.35	95.41	95.36	96.47
1226	96.2	95.23	95.14	96.32
1225	96.04	95.04	94.9	96.17
1224	95.88	94.83	94.61	95.99
1223	95.72	94.57	94.29	95.76
1222	95.55	94.29	93.97	95.55
1221	95.38	94.01	93.68	95.39
1220	95.22	93.73	93.45	95.24
1219	95.05	93.46	93.23	95.04
1218	94.9	93.21	93	94.8
1217	94.74	92.99	92.76	94.59
1216	94.6	92.79	92.5	94.46
1215	94.46	92.61	92.23	94.37
1214	94.34	92.43	91.97	94.24
1213	94.22	92.26	91.75	94.1
1212	94.11	92.1	91.6	94
1211	94	91.98	91.55	93.96
1210	93.91	91.89	91.55	93.9
1209	93.82	91.83	91.54	93.79
1208	93.73	91.79	91.48	93.68
1207	93.64	91.75	91.37	93.62
1206	93.56	91.69	91.25	93.63
1205	93.47	91.62	91.13	93.62
1204	93.38	91.57	91.02	93.56
1203	93.27	91.52	90.94	93.5
1202	93.16	91.46	90.9	93.47
1201	93.03	91.35	90.86	93.44
1200	92.89	91.22	90.79	93.34
1199	92.73	91.05	90.66	93.17
1198	92.55	90.87	90.43	92.99
1197	92.35	90.66	90.12	92.88
1196	92.14	90.41	89.77	92.78
1195	91.91	90.12	89.42	92.6
1194	91.67	89.8	89.07	92.33
1193	91.42	89.43	88.72	92.01
1192	91.18	89.02	88.35	91.71
1191	90.94	88.58	87.93	91.41
1190	90.73	88.13	87.46	91.07
1189	90.53	87.67	86.94	90.67
1188	90.38	87.21	86.4	90.31
1187	90.26	86.76	85.87	90.01
1186	90.2	86.35	85.41	89.78
1185	90.19	85.99	85.06	89.6
1184	90.24	85.72	84.9	89.52
1183	90.35	85.66	84.99	89.59
1182	90.53	85.88	85.37	89.82
1181	90.78	86.41	86.02	90.21
1180	91.08	87.22	86.89	90.77
1179	91.44	88.24	87.96	91.51
1178	91.85	89.4	89.14	92.38
1177	92.29	90.59	90.37	93.25
1176	92.76	91.73	91.58	94.03
1175	93.24	92.77	92.7	94.68
1174	93.72	93.66	93.67	95.28
1173	94.2	94.39	94.47	95.84
1172	94.66	94.98	95.12	96.3
1171	95.09	95.46	95.63	96.6
1170	95.5	95.87	96.04	96.83
1169	95.88	96.23	96.38	97.07
1168	96.22	96.53	96.66	97.35
1167	96.52	96.78	96.91	97.59
1166	96.78	96.97	97.12	97.73
1165	97.01	97.13	97.32	97.8
1164	97.19	97.26	97.5	97.88
1163	97.35	97.37	97.66	97.96
1162	97.47	97.46	97.78	98
1161	97.57	97.53	97.83	97.99
1160	97.64	97.57	97.83	97.99
1159	97.69	97.59	97.82	98.03
1158	97.72	97.61	97.84	98.09
1157	97.72	97.61	97.86	98.09
1156	97.71	97.59	97.86	98.05
1155	97.68	97.53	97.83	98
1154	97.63	97.44	97.74	97.98
1153	97.55	97.37	97.62	97.95
1152	97.45	97.3	97.47	97.88
1151	97.32	97.22	97.3	97.75
1150	97.17	97.04	97.07	97.58

## Sheet: Fig. 2j
x-axis-Wavenumber (cm‒1)	y-axis-Transmittance (a.u.)
	P-PLA	MRSD-PLA2	MRSD-PLA4	MRSD-PLA6
1160	97.64	97.57	97.83	97.99
1159	97.69	97.59	97.82	98.03
1158	97.72	97.61	97.84	98.09
1157	97.72	97.61	97.86	98.09
1156	97.71	97.59	97.86	98.05
1155	97.68	97.53	97.83	98
1154	97.63	97.44	97.74	97.98
1153	97.55	97.37	97.62	97.95
1152	97.45	97.3	97.47	97.88
1151	97.32	97.22	97.3	97.75
1150	97.17	97.04	97.07	97.58
1149	96.99	96.78	96.79	97.39
1148	96.79	96.46	96.47	97.16
1147	96.57	96.15	96.15	96.91
1146	96.33	95.85	95.84	96.67
1145	96.06	95.52	95.49	96.47
1144	95.78	95.12	95.04	96.24
1143	95.48	94.65	94.48	95.9
1142	95.17	94.1	93.84	95.42
1141	94.86	93.51	93.18	94.89
1140	94.55	92.9	92.53	94.41
1139	94.24	92.31	91.94	94
1138	93.94	91.74	91.41	93.65
1137	93.67	91.22	90.92	93.32
1136	93.41	90.77	90.44	93.06
1135	93.18	90.4	89.97	92.84
1134	92.98	90.1	89.56	92.63
1133	92.8	89.85	89.23	92.37
1132	92.67	89.67	89	92.14
1131	92.56	89.55	88.88	92.01
1130	92.49	89.5	88.87	92.03
1129	92.45	89.5	88.95	92.11
1128	92.44	89.57	89.08	92.18
1127	92.45	89.72	89.26	92.25
1126	92.49	89.95	89.49	92.39
1125	92.54	90.25	89.77	92.6
1124	92.61	90.55	90.08	92.83
1123	92.68	90.83	90.38	93.03
1122	92.74	91.04	90.64	93.19
1121	92.8	91.19	90.85	93.37
1120	92.85	91.29	90.99	93.53
1119	92.87	91.37	91.07	93.63
1118	92.88	91.43	91.07	93.63
1117	92.85	91.44	91.03	93.58
1116	92.8	91.39	90.96	93.51
1115	92.71	91.3	90.87	93.42
1114	92.59	91.19	90.74	93.26
1113	92.43	91.02	90.55	93.05
1112	92.24	90.76	90.29	92.85
1111	92.02	90.41	89.95	92.66
1110	91.76	89.99	89.5	92.41
1109	91.47	89.52	88.96	92.06
1108	91.16	88.99	88.34	91.64
1107	90.82	88.41	87.67	91.21
1106	90.47	87.83	87.01	90.8
1105	90.1	87.25	86.38	90.37
1104	89.72	86.68	85.77	89.91
1103	89.33	86.12	85.18	89.48
1102	88.95	85.58	84.6	89.11
1101	88.56	85.02	84.02	88.77
1100	88.18	84.46	83.46	88.4
1099	87.81	83.91	82.93	87.99
1098	87.46	83.41	82.42	87.61
1097	87.12	82.95	81.95	87.31
1096	86.81	82.52	81.53	87.04
1095	86.53	82.13	81.17	86.72
1094	86.29	81.78	80.86	86.37
1093	86.08	81.44	80.57	86.1
1092	85.92	81.11	80.27	85.94
1091	85.8	80.83	79.99	85.84
1090	85.74	80.65	79.79	85.73
1089	85.73	80.57	79.71	85.67
1088	85.78	80.6	79.8	85.73
1087	85.88	80.74	80.05	85.94
1086	86.04	81.01	80.46	86.19
1085	86.26	81.41	81	86.46
1084	86.54	81.93	81.63	86.81
1083	86.87	82.55	82.31	87.34
1082	87.25	83.28	83.03	88.01
1081	87.67	84.09	83.78	88.66
1080	88.12	84.94	84.61	89.25
1079	88.61	85.82	85.52	89.85
1078	89.11	86.72	86.48	90.51
1077	89.63	87.61	87.45	91.19
1076	90.16	88.47	88.37	91.79
1075	90.68	89.26	89.22	92.32
1074	91.19	89.99	89.99	92.87
1073	91.69	90.7	90.72	93.46
1072	92.17	91.41	91.43	94.03
1071	92.62	92.09	92.13	94.49
1070	93.04	92.71	92.78	94.85
1069	93.42	93.22	93.35	95.18
1068	93.77	93.66	93.82	95.48
1067	94.07	94.03	94.2	95.69
1066	94.34	94.32	94.49	95.79
1065	94.57	94.52	94.69	95.87
1064	94.76	94.66	94.82	96.04
1063	94.91	94.77	94.92	96.23
1062	95.03	94.85	94.98	96.33
1061	95.11	94.89	95	96.29
1060	95.17	94.87	95.01	96.21
1059	95.2	94.79	94.99	96.19
1058	95.2	94.68	94.93	96.18
1057	95.19	94.57	94.78	96.09
1056	95.16	94.45	94.54	95.91
1055	95.12	94.32	94.26	95.77
1054	95.07	94.18	94.03	95.72
1053	95.02	94.05	93.9	95.68
1052	94.97	93.93	93.83	95.55
1051	94.93	93.82	93.74	95.37
1050	94.88	93.7	93.62	95.28
1049	94.85	93.57	93.48	95.31
1048	94.83	93.45	93.36	95.34
1047	94.82	93.36	93.28	95.32
1046	94.83	93.31	93.26	95.28
1045	94.86	93.32	93.31	95.33
1044	94.9	93.41	93.48	95.43
1043	94.97	93.58	93.76	95.53
1042	95.04	93.8	94.1	95.59
1041	95.13	94.02	94.43	95.7
1040	95.24	94.24	94.68	95.9
1039	95.35	94.49	94.85	96.13
1038	95.48	94.78	94.98	96.33
1037	95.61	95.1	95.12	96.5
1036	95.74	95.41	95.34	96.71
1035	95.88	95.69	95.66	96.97
1034	96.02	95.94	96.02	97.18
1033	96.16	96.14	96.36	97.26
1032	96.29	96.3	96.61	97.25
1031	96.41	96.39	96.75	97.25
1030	96.53	96.44	96.78	97.31
1029	96.65	96.49	96.76	97.38
1028	96.76	96.56	96.76	97.41
1027	96.87	96.67	96.85	97.45
1026	96.97	96.79	97.03	97.57
1025	97.06	96.92	97.26	97.73
1024	97.15	97.05	97.47	97.85
1023	97.24	97.19	97.62	97.9
1022	97.33	97.32	97.71	97.94
1021	97.41	97.43	97.79	98.04
1020	97.5	97.53	97.86	98.14

## Sheet: Fig. 2k
x-axis-Theta (Degree)	y-axis2-Intensity (a.u.)
	P-PLA	MRSD-PLA2	MRSD-PLA4	MRSD-PLA6
5	168	92	136	77
5.01951	183	96	141	80
5.03902	170	87	147	95
5.05854	188	77	142	101
5.07805	161	81	143	83
5.09756	176	84	148	91
5.11707	176	77	138	101
5.13658	183	91	145	87
5.1561	165	103	149	90
5.17561	180	101	154	91
5.19512	170	74	155	89
5.21463	174	88	132	96
5.23415	181	82	143	108
5.25366	153	81	109	83
5.27317	172	79	127	87
5.29268	168	75	144	91
5.31219	157	79	136	84
5.33171	163	96	116	72
5.35122	163	76	146	89
5.37073	158	75	114	81
5.39024	162	84	102	87
5.40975	171	80	134	72
5.42927	150	72	146	78
5.44878	162	74	145	89
5.46829	172	75	125	88
5.4878	167	82	120	107
5.50731	183	81	132	81
5.52683	166	68	123	88
5.54634	185	85	104	102
5.56585	147	70	139	81
5.58536	168	72	124	83
5.60487	166	72	111	80
5.62439	175	64	125	75
5.6439	170	74	110	82
5.66341	163	75	145	86
5.68292	164	64	117	93
5.70243	173	71	120	64
5.72195	149	71	144	77
5.74146	163	71	107	66
5.76097	143	81	125	96
5.78048	164	62	116	82
5.79999	149	66	116	75
5.81951	159	62	132	70
5.83902	136	67	106	89
5.85853	142	69	118	82
5.87804	145	89	133	56
5.89756	167	69	127	79
5.91707	152	70	123	78
5.93658	182	73	119	78
5.95609	145	69	135	81
5.9756	187	63	108	61
5.99512	146	84	115	70
6.01463	152	72	117	78
6.03414	178	63	112	73
6.05365	158	70	119	68
6.07316	152	58	133	79
6.09268	142	67	126	91
6.11219	153	65	118	82
6.1317	146	65	107	68
6.15121	165	77	106	73
6.17072	148	69	106	64
6.19024	146	80	110	67
6.20975	154	74	115	68
6.22926	131	57	113	88
6.24877	152	72	104	76
6.26828	131	79	130	86
6.2878	142	70	113	73
6.30731	165	63	118	75
6.32682	143	71	124	75
6.34633	172	60	127	79
6.36584	147	65	126	81
6.38536	144	59	90	77
6.40487	147	66	113	74
6.42438	146	58	105	80
6.44389	136	55	100	61
6.46341	157	57	106	70
6.48292	141	70	125	71
6.50243	168	60	123	65
6.52194	174	60	97	74
6.54145	148	57	105	60
6.56097	150	72	125	63
6.58048	166	78	126	96
6.59999	150	55	110	78
6.6195	120	73	107	82
6.63901	195	63	107	74
6.65853	148	67	116	80
6.67804	159	70	110	70
6.69755	142	55	103	77
6.71706	165	64	111	72
6.73657	159	49	105	67
6.75609	148	58	111	82
6.7756	162	64	104	77
6.79511	106	49	113	78
6.81462	155	62	99	71
6.83413	142	48	113	69
6.85365	150	56	102	75
6.87316	128	64	100	82
6.89267	148	71	100	72
6.91218	139	53	93	77
6.93169	152	80	113	68
6.95121	173	62	83	82
6.97072	141	72	112	76
6.99023	150	63	113	85
7.00974	155	60	123	69
7.02925	148	65	123	63
7.04877	152	61	115	71
7.06828	162	67	121	76
7.08779	138	77	115	80
7.1073	145	61	100	93
7.12682	164	62	122	73
7.14633	156	72	127	84
7.16584	156	70	129	83
7.18535	177	63	169	81
7.20486	167	50	161	76
7.22438	152	73	192	81
7.24389	144	73	180	77
7.2634	148	59	191	81
7.28291	142	64	187	87
7.30242	145	57	215	93
7.32194	140	71	213	126
7.34145	165	83	231	108
7.36096	159	89	251	123
7.38047	140	82	217	140
7.39998	151	90	257	141
7.4195	160	108	282	188
7.43901	156	106	248	185
7.45852	140	128	274	212
7.47803	165	149	286	240
7.49754	141	162	271	274
7.51706	168	168	254	300
7.53657	152	179	300	312
7.55608	167	192	285	352
7.57559	166	222	277	351
7.5951	140	236	285	334
7.61462	169	234	258	372
7.63413	141	256	295	353
7.65364	180	269	289	358
7.67315	174	252	273	321
7.69267	151	277	306	312
7.71218	155	270	243	302
7.73169	168	240	269	258
7.7512	186	229	256	259
7.77071	190	213	243	225
7.79023	168	207	235	199
7.80974	178	165	249	207
7.82925	170	131	208	141
7.84876	135	131	188	148
7.86827	168	124	170	124
7.88779	182	84	159	134
7.9073	157	77	154	99
7.92681	152	77	141	105
7.94632	147	71	133	102
7.96583	167	87	125	87
7.98535	150	80	124	109
8.00486	137	64	105	90
8.02437	166	75	130	85
8.04388	185	64	124	86
8.06339	149	72	116	79
8.08291	147	86	110	73
8.10242	160	78	120	80
8.12193	145	65	122	72
8.14144	173	69	125	89
8.16095	163	74	120	72
8.18047	180	71	127	84
8.19998	161	58	122	72
8.21949	161	68	106	73
8.239	149	68	97	77
8.25851	140	54	124	88
8.27803	179	51	102	70
8.29754	158	58	115	83
8.31705	167	56	91	87
8.33656	166	71	101	74
8.35608	168	68	108	77
8.37559	162	65	111	83
8.3951	174	62	97	88
8.41461	174	76	98	78
8.43412	155	72	124	70
8.45364	209	64	120	65
8.47315	164	62	123	73
8.49266	156	52	90	65
8.51217	150	74	119	83
8.53168	178	63	110	78
8.5512	176	69	97	81
8.57071	157	73	126	91
8.59022	167	61	90	75
8.60973	172	78	117	81
8.62924	183	70	108	66
8.64876	146	54	108	88
8.66827	172	64	110	82
8.68778	172	59	118	83
8.70729	178	67	111	82
8.7268	175	62	87	77
8.74632	167	64	136	70
8.76583	193	61	121	68
8.78534	169	59	110	82
8.80485	163	62	113	80
8.82437	171	66	98	79
8.84388	167	68	105	85
8.86339	144	62	123	76
8.8829	157	64	105	61
8.90241	178	69	110	83
8.92193	162	77	115	84
8.94144	192	53	107	84
8.96095	159	62	111	93
8.98046	161	65	123	68
8.99997	192	66	128	91
9.01949	175	64	129	87
9.039	171	68	108	75
9.05851	174	65	113	100
9.07802	147	60	106	87
9.09753	178	69	116	92
9.11705	172	66	91	84
9.13656	183	59	94	80
9.15607	211	72	108	83
9.17558	166	68	126	84
9.19509	194	76	99	92
9.21461	191	70	132	105
9.23412	195	62	112	76
9.25363	185	65	112	88
9.27314	179	79	106	74
9.29265	193	66	110	84
9.31217	193	61	128	82
9.33168	192	68	106	80
9.35119	184	58	109	89
9.3707	191	68	96	91
9.39021	183	64	125	92
9.40973	201	68	105	82
9.42924	193	56	114	81
9.44875	167	83	121	91
9.46826	176	67	98	89
9.48778	209	64	111	88
9.50729	158	73	109	92
9.5268	192	68	122	81
9.54631	191	74	111	91
9.56582	193	81	122	90
9.58534	188	69	119	86
9.60485	211	85	134	91
9.62436	186	70	111	96
9.64387	195	64	132	92
9.66338	199	79	131	93
9.6829	146	61	102	103
9.70241	217	61	118	97
9.72192	168	71	120	97
9.74143	182	74	124	84
9.76094	237	78	123	121
9.78046	205	64	107	107
9.79997	201	88	109	116
9.81948	202	71	114	98
9.83899	202	74	114	90
9.8585	189	65	103	81
9.87802	187	78	126	93
9.89753	204	76	116	91
9.91704	202	71	106	105
9.93655	195	67	121	115
9.95606	200	69	122	89
9.97558	205	74	120	84
9.99509	192	80	140	98
10.0146	195	71	119	79
10.0341	191	63	130	88
10.0536	194	68	124	83
10.0731	215	59	125	99
10.0926	217	66	116	99
10.1122	210	77	127	116
10.1317	185	80	126	102
10.1512	191	81	145	87
10.1707	234	76	131	108
10.1902	224	79	153	87
10.2097	223	72	118	103
10.2292	222	83	115	115
10.2487	201	80	130	91
10.2683	193	75	129	114
10.2878	203	82	130	99
10.3073	210	72	134	90
10.3268	215	57	139	124
10.3463	201	73	124	97
10.3658	222	90	147	101
10.3853	206	74	138	95
10.4048	202	76	136	99
10.4244	216	82	143	110
10.4439	211	70	137	118
10.4634	218	89	123	127
10.4829	190	83	132	122
10.5024	210	83	142	123
10.5219	230	91	150	135
10.5414	206	103	135	141
10.5609	200	77	146	151
10.5805	205	96	191	150
10.6	222	104	175	179
10.6195	224	88	136	130
10.639	234	104	165	168
10.6585	213	109	153	165
10.678	233	106	151	170
10.6975	200	133	143	157
10.717	249	123	175	169
10.7365	228	97	162	135
10.7561	217	112	186	161
10.7756	209	116	186	146
10.7951	192	97	166	143
10.8146	184	103	161	123
10.8341	194	105	156	136
10.8536	247	89	159	123
10.8731	217	81	151	119
10.8926	224	93	161	138
10.9122	214	97	148	141
10.9317	249	86	158	135
10.9512	234	85	127	120
10.9707	229	98	125	127
10.9902	219	75	129	138
11.0097	239	91	146	124
11.0292	230	85	110	123
11.0487	245	86	167	122
11.0683	248	91	131	134
11.0878	235	87	126	118
11.1073	221	78	135	113
11.1268	230	88	132	158
11.1463	244	88	105	136
11.1658	241	78	120	113
11.1853	219	100	135	132
11.2048	251	87	127	132
11.2243	256	68	132	123
11.2439	228	77	128	115
11.2634	239	84	141	123
11.2829	232	81	168	111
11.3024	237	74	115	129
11.3219	240	92	122	125
11.3414	231	95	115	116
11.3609	216	69	126	132
11.3804	254	101	150	112
11.4	217	88	135	125
11.4195	248	95	124	108
11.439	248	77	124	123
11.4585	226	100	138	123
11.478	208	84	147	119
11.4975	226	88	147	125
11.517	229	93	141	124
11.5365	246	91	134	120
11.5561	248	104	150	126
11.5756	258	86	150	131
11.5951	247	113	159	133
11.6146	245	83	129	123
11.6341	239	87	150	123
11.6536	262	118	149	143
11.6731	256	105	130	118
11.6926	250	107	140	126
11.7121	244	82	110	130
11.7317	257	94	121	147
11.7512	221	83	140	133
11.7707	266	92	138	132
11.7902	249	97	169	128
11.8097	243	108	152	137
11.8292	251	92	129	130
11.8487	230	97	146	133
11.8682	239	107	158	129
11.8878	243	95	138	112
11.9073	271	89	162	131
11.9268	242	114	122	144
11.9463	264	92	109	145
11.9658	264	94	155	154
11.9853	264	102	128	137
12.0048	248	101	156	148
12.0243	254	103	128	146
12.0439	226	89	153	134
12.0634	229	87	149	144
12.0829	275	107	165	147
12.1024	244	80	118	151
12.1219	255	91	165	142
12.1414	272	91	171	139
12.1609	258	105	158	136
12.1804	265	99	135	143
12.1999	233	100	143	167
12.2195	273	102	138	156
12.239	246	118	152	149
12.2585	268	97	138	147
12.278	251	123	164	146
12.2975	286	97	151	153
12.317	219	106	142	172
12.3365	281	110	147	140
12.356	270	107	161	168
12.3756	273	107	157	169
12.3951	252	97	150	135
12.4146	273	101	148	124
12.4341	226	99	180	153
12.4536	256	110	179	153
12.4731	278	102	149	134
12.4926	254	95	131	131
12.5121	271	113	149	151
12.5317	245	117	168	148
12.5512	245	99	142	155
12.5707	261	94	172	138
12.5902	263	98	179	155
12.6097	251	92	179	149
12.6292	246	101	155	153
12.6487	272	91	181	169
12.6682	251	114	182	172
12.6877	269	96	167	174
12.7073	286	109	180	170
12.7268	280	99	187	160
12.7463	255	120	185	175
12.7658	235	101	155	168
12.7853	247	102	207	184
12.8048	238	101	173	170
12.8243	236	86	201	210
12.8438	271	106	206	236
12.8634	275	123	185	224
12.8829	285	117	230	223
12.9024	270	125	183	221
12.9219	267	119	237	216
12.9414	247	142	215	214
12.9609	285	143	214	249
12.9804	251	152	198	252
12.9999	248	150	236	247
13.0195	268	141	225	274
13.039	232	155	226	246
13.0585	270	160	239	263
13.078	266	170	231	258
13.0975	259	171	205	191
13.117	262	142	215	220
13.1365	288	169	201	217
13.156	262	137	195	205
13.1755	251	150	217	181
13.1951	256	121	176	174
13.2146	235	122	206	190
13.2341	241	116	192	177
13.2536	252	127	188	177
13.2731	255	125	156	193
13.2926	253	116	156	177
13.3121	260	114	190	191
13.3316	238	103	172	190
13.3512	262	106	156	182
13.3707	268	107	146	166
13.3902	273	112	171	168
13.4097	259	110	160	157
13.4292	265	115	177	179
13.4487	254	117	182	178
13.4682	255	102	150	171
13.4877	280	125	176	201
13.5073	243	112	161	194
13.5268	259	109	174	167
13.5463	266	106	177	164
13.5658	261	100	159	162
13.5853	269	111	161	170
13.6048	268	99	172	183
13.6243	279	98	153	182
13.6438	277	108	167	171
13.6633	269	107	178	181
13.6829	275	106	162	174
13.7024	284	97	182	181
13.7219	276	103	179	145
13.7414	262	108	165	184
13.7609	267	93	162	150
13.7804	240	90	168	151
13.7999	257	104	155	184
13.8194	285	102	165	198
13.839	227	121	177	191
13.8585	248	133	169	192
13.878	248	98	184	182
13.8975	284	109	171	177
13.917	282	89	176	165
13.9365	259	109	180	163
13.956	259	113	172	186
13.9755	273	116	157	183
13.9951	218	119	181	182
14.0146	255	127	178	205
14.0341	245	93	164	173
14.0536	256	105	179	205
14.0731	287	104	158	199
14.0926	234	109	181	188
14.1121	266	127	178	205
14.1316	232	103	160	174
14.1511	264	120	183	185
14.1707	238	100	186	184
14.1902	257	121	154	176
14.2097	264	114	155	181
14.2292	247	83	156	190
14.2487	240	111	170	195
14.2682	245	102	176	173
14.2877	239	106	178	173
14.3072	243	98	197	179
14.3268	268	122	175	185
14.3463	240	115	187	167
14.3658	243	124	187	199
14.3853	244	110	186	190
14.4048	224	94	163	171
14.4243	254	108	165	179
14.4438	251	89	164	190
14.4634	260	111	168	187
14.4829	252	117	181	162
14.5024	228	95	172	194
14.5219	260	87	183	194
14.5414	272	102	181	178
14.5609	246	113	179	190
14.5804	244	104	191	180
14.5999	267	117	185	187
14.6194	233	127	177	179
14.6389	257	94	169	177
14.6585	243	94	190	192
14.678	231	117	155	173
14.6975	248	112	150	179
14.717	242	109	177	180
14.7365	254	82	184	199
14.756	237	89	179	214
14.7755	233	126	178	170
14.795	253	124	179	208
14.8146	221	112	196	195
14.8341	245	101	190	204
14.8536	251	90	209	196
14.8731	253	101	169	180
14.8926	234	118	190	223
14.9121	213	107	209	219
14.9316	249	88	200	208
14.9512	257	132	177	185
14.9707	250	156	184	192
14.9902	236	118	197	209
15.0097	286	128	187	196
15.0292	227	134	188	193
15.0487	282	107	193	203
15.0682	242	120	198	183
15.0877	232	101	176	191
15.1072	221	113	190	182
15.1268	212	118	195	235
15.1463	251	135	178	219
15.1658	268	113	176	195
15.1853	220	98	174	192
15.2048	238	111	178	218
15.2243	211	97	202	231
15.2438	217	117	193	173
15.2633	260	103	188	205
15.2828	242	103	179	177
15.3024	215	107	189	186
15.3219	249	109	195	195
15.3414	240	122	152	189
15.3609	236	98	180	179
15.3804	251	92	152	183
15.3999	245	102	180	194
15.4194	228	111	198	195
15.439	223	101	158	169
15.4585	216	90	161	200
15.478	246	110	175	198
15.4975	211	115	188	170
15.517	230	94	189	208
15.5365	225	108	170	187
15.556	223	94	178	196
15.5755	214	107	194	199
15.5951	247	112	184	181
15.6146	227	110	207	194
15.6341	266	130	182	180
15.6536	220	106	193	182
15.6731	250	120	185	200
15.6926	256	91	185	181
15.7121	237	108	181	222
15.7316	240	123	192	193
15.7511	215	112	196	202
15.7706	244	107	184	189
15.7902	236	106	179	190
15.8097	238	91	177	184
15.8292	207	106	165	191
15.8487	227	118	157	200
15.8682	222	110	169	196
15.8877	240	108	179	188
15.9072	240	113	181	192
15.9268	273	96	178	164
15.9463	223	116	180	186
15.9658	261	111	201	200
15.9853	203	97	162	205
16.0048	243	115	206	196
16.0243	223	101	205	178
16.0438	245	95	202	215
16.0633	224	114	169	181
16.0829	237	117	179	180
16.1024	255	91	187	175
16.1219	261	99	146	206
16.1414	235	109	177	205
16.1609	222	102	181	210
16.1804	242	116	177	209
16.1999	239	110	179	202
16.2194	230	89	183	185
16.2389	247	92	168	191
16.2585	215	107	157	196
16.278	225	109	175	212
16.2975	246	103	181	204
16.317	202	120	164	191
16.3365	210	90	171	188
16.356	230	100	188	200
16.3755	222	98	188	190
16.395	239	100	169	178
16.4145	200	107	209	190
16.4341	229	106	181	180
16.4536	231	120	203	203
16.4731	223	116	169	178
16.4926	238	98	198	203
16.5121	219	116	204	206
16.5316	254	122	199	189
16.5511	230	106	195	189
16.5707	203	113	152	193
16.5902	224	98	186	189
16.6097	249	102	194	189
16.6292	220	113	179	221
16.6487	241	110	202	217
16.6682	245	120	185	230
16.6877	257	115	196	210
16.7072	210	120	209	234
16.7267	219	109	204	212
16.7463	235	129	172	231
16.7658	230	111	186	218
16.7853	226	115	181	211
16.8048	201	119	208	229
16.8243	244	117	202	216
16.8438	233	154	182	189
16.8633	215	113	164	215
16.8828	227	112	168	208
16.9023	223	106	191	213
16.9219	218	96	197	189
16.9414	241	128	178	202
16.9609	216	111	178	204
16.9804	214	91	202	198
16.9999	209	97	151	212
17.0194	231	104	175	192
17.0389	229	107	176	205
17.0585	227	126	187	175
17.078	191	91	178	192
17.0975	227	98	170	185
17.117	198	93	138	178
17.1365	198	103	156	175
17.156	217	100	170	202
17.1755	219	124	154	183
17.195	204	82	161	192
17.2145	231	87	165	192
17.2341	228	97	159	167
17.2536	229	107	152	205
17.2731	193	82	183	192
17.2926	189	105	175	174
17.3121	178	90	154	180
17.3316	201	102	186	179
17.3511	203	87	154	172
17.3706	207	108	167	208
17.3902	202	91	152	198
17.4097	212	93	172	169
17.4292	191	84	151	178
17.4487	176	102	165	168
17.4682	194	97	149	189
17.4877	195	80	193	192
17.5072	191	95	159	186
17.5267	207	97	176	196
17.5463	208	79	122	191
17.5658	190	73	152	164
17.5853	199	87	135	156
17.6048	196	91	160	174
17.6243	182	89	172	183
17.6438	204	84	148	203
17.6633	193	90	162	169
17.6828	203	96	158	180
17.7023	205	100	154	162
17.7219	205	100	146	159
17.7414	187	86	136	157
17.7609	189	74	154	177
17.7804	194	105	139	177
17.7999	166	91	145	172
17.8194	178	101	151	170
17.8389	199	69	140	153
17.8585	183	87	145	178
17.878	207	83	151	169
17.8975	163	92	143	175
17.917	186	74	150	170
17.9365	179	95	150	168
17.956	182	85	123	175
17.9755	180	92	148	156
17.995	169	85	166	176
18.0145	170	98	155	173
18.0341	179	84	150	155
18.0536	199	90	153	147
18.0731	181	95	137	162
18.0926	185	84	142	177
18.1121	207	88	138	160
18.1316	158	82	126	172
18.1511	175	80	158	186
18.1706	199	100	159	171
18.1901	195	90	155	189
18.2097	191	92	168	180
18.2292	178	93	149	174
18.2487	185	88	137	212
18.2682	183	106	141	219
18.2877	179	82	162	194
18.3072	187	102	146	199
18.3267	179	99	162	189
18.3463	200	96	169	205
18.3658	181	80	166	201
18.3853	177	111	152	198
18.4048	174	109	164	183
18.4243	171	88	174	157
18.4438	162	96	182	184
18.4633	173	100	170	195
18.4828	166	86	156	169
18.5023	165	96	148	153
18.5219	173	88	141	162
18.5414	153	77	152	173
18.5609	171	83	125	192
18.5804	170	79	129	167
18.5999	160	86	131	169
18.6194	169	76	142	143
18.6389	186	67	123	165
18.6584	172	60	125	201
18.6779	167	74	139	164
18.6975	177	85	129	150
18.717	150	75	110	150
18.7365	176	79	123	146
18.756	179	78	140	136
18.7755	168	76	141	166
18.795	156	94	132	141
18.8145	165	86	129	165
18.8341	200	72	126	157
18.8536	169	73	121	132
18.8731	164	76	109	156
18.8926	169	71	129	158
18.9121	181	73	120	175
18.9316	148	91	119	157
18.9511	152	72	134	151
18.9706	154	71	147	147
18.9901	158	77	108	136
19.0097	156	81	141	147
19.0292	142	81	126	164
19.0487	167	72	119	174
19.0682	150	90	106	132
19.0877	153	83	111	139
19.1072	150	66	119	138
19.1267	131	71	115	131
19.1462	139	77	105	140
19.1657	137	76	131	119
19.1853	184	74	133	158
19.2048	159	62	129	145
19.2243	160	81	127	161
19.2438	155	78	108	162
19.2633	139	66	129	150
19.2828	152	65	133	125
19.3023	157	65	110	131
19.3219	161	74	122	125
19.3414	153	70	127	134
19.3609	139	75	105	170
19.3804	137	78	117	145
19.3999	152	71	93	142
19.4194	163	69	151	127
19.4389	167	80	118	167
19.4584	142	71	121	127
19.4779	150	72	116	140
19.4975	150	72	131	159
19.517	163	76	108	138
19.5365	163	74	110	137
19.556	137	79	112	151
19.5755	134	78	136	117
19.595	148	79	107	144
19.6145	149	61	131	137
19.634	169	67	120	156
19.6535	154	63	112	160
19.6731	163	67	110	160
19.6926	141	60	124	136
19.7121	155	76	108	142
19.7316	128	78	94	161
19.7511	164	79	134	141
19.7706	174	59	101	154
19.7901	143	79	128	139
19.8097	141	69	108	145
19.8292	134	61	113	146
19.8487	134	57	129	147
19.8682	149	67	98	146
19.8877	157	82	109	155
19.9072	139	78	111	134
19.9267	160	67	124	122
19.9462	127	65	112	142
19.9657	135	70	123	122
19.9853	148	72	112	132
20.0048	131	51	91	138
20.0243	126	58	114	125
20.0438	132	51	96	120
20.0633	140	64	98	129
20.0828	151	61	124	135
20.1023	144	49	110	138
20.1218	140	63	107	120
20.1414	134	59	103	143
20.1609	130	72	113	125
20.1804	130	74	99	129
20.1999	136	62	110	131
20.2194	134	71	122	136
20.2389	150	75	114	131
20.2584	126	59	104	126
20.2779	129	72	116	134
20.2975	131	49	99	135
20.317	120	68	104	127
20.3365	124	76	101	115
20.356	137	69	93	137
20.3755	157	66	106	97
20.395	130	72	95	119
20.4145	132	59	107	133
20.434	143	56	118	121
20.4535	132	57	122	112
20.4731	137	72	117	119
20.4926	142	61	106	129
20.5121	119	67	113	128
20.5316	143	47	113	119
20.5511	146	71	90	138
20.5706	128	51	95	141
20.5901	125	70	92	128
20.6096	123	65	111	109
20.6292	113	58	105	123
20.6487	135	65	113	124
20.6682	136	53	109	137
20.6877	108	65	125	121
20.7072	125	52	110	115
20.7267	127	55	84	134
20.7462	143	61	110	137
20.7657	148	55	82	124
20.7853	103	49	84	125
20.8048	132	67	99	125
20.8243	122	57	115	107
20.8438	145	62	101	123
20.8633	129	53	114	113
20.8828	111	69	103	132
20.9023	129	62	88	128
20.9218	141	41	95	115
20.9413	123	61	114	108
20.9609	129	67	106	117
20.9804	124	74	109	103
20.9999	114	60	111	130
21.0194	150	66	101	122
21.0389	129	64	97	122
21.0584	126	54	105	116
21.0779	116	65	129	116
21.0974	114	70	100	102
21.117	106	63	101	123
21.1365	123	53	102	105
21.156	129	59	88	126
21.1755	126	61	105	113
21.195	102	51	87	127
21.2145	113	68	109	141
21.234	121	51	107	121
21.2535	123	57	74	128
21.2731	123	53	90	134
21.2926	121	45	93	119
21.3121	131	67	87	101
21.3316	131	62	103	111
21.3511	115	61	107	103
21.3706	117	59	92	126
21.3901	122	50	94	144
21.4096	118	62	91	104
21.4291	117	51	105	119
21.4487	120	53	112	106
21.4682	121	64	89	113
21.4877	100	43	83	108
21.5072	117	60	89	115
21.5267	111	73	98	107
21.5462	114	54	97	114
21.5657	126	47	88	94
21.5852	110	53	103	126
21.6048	95	55	95	100
21.6243	111	52	106	120
21.6438	112	45	100	103
21.6633	104	47	98	123
21.6828	104	50	94	107
21.7023	133	60	79	127
21.7218	129	64	78	101
21.7414	91	57	96	95
21.7609	127	51	88	96
21.7804	121	63	100	99
21.7999	106	55	90	108
21.8194	116	61	83	90
21.8389	107	56	83	109
21.8584	108	59	90	102
21.8779	100	64	92	98
21.8974	98	64	110	120
21.9169	128	53	86	98
21.9365	111	59	79	120
21.956	106	47	76	98
21.9755	122	69	79	98
21.995	88	40	87	108
22.0145	114	49	85	103
22.034	108	53	95	112
22.0535	111	54	98	108
22.073	92	47	87	101
22.0926	121	56	86	105
22.1121	109	46	81	130
22.1316	112	54	95	116
22.1511	103	59	82	112
22.1706	99	52	97	92
22.1901	96	58	88	94
22.2096	103	51	99	103
22.2292	103	49	74	119
22.2487	98	46	96	95
22.2682	102	59	101	103
22.2877	94	59	88	101
22.3072	97	54	87	101
22.3267	98	62	78	107
22.3462	114	45	92	110
22.3657	83	60	90	94
22.3852	96	57	85	106
22.4048	87	55	90	105
22.4243	88	43	93	109
22.4438	95	45	84	110
22.4633	92	42	98	112
22.4828	87	47	94	116
22.5023	104	51	56	101
22.5218	100	36	66	111
22.5413	97	54	78	92
22.5608	102	57	82	119
22.5804	94	52	78	102
22.5999	82	50	81	100
22.6194	100	42	76	104
22.6389	81	42	88	113
22.6584	102	47	82	90
22.6779	99	40	66	90
22.6974	73	48	84	94
22.717	82	49	75	89
22.7365	82	54	94	95
22.756	100	40	65	101
22.7755	117	40	64	104
22.795	101	40	85	90
22.8145	101	49	81	91
22.834	84	40	72	88
22.8535	91	45	71	103
22.873	88	54	81	105
22.8926	90	37	76	103
22.9121	75	36	82	99
22.9316	87	51	82	85
22.9511	98	45	67	102
22.9706	109	37	77	102
22.9901	89	40	77	105
23.0096	77	46	79	93
23.0291	92	40	77	98
23.0486	102	52	78	88
23.0682	78	45	62	90
23.0877	90	56	76	90
23.1072	79	46	71	92
23.1267	84	44	70	86
23.1462	77	52	72	94
23.1657	75	46	63	91
23.1852	75	40	91	80
23.2048	84	45	67	93
23.2243	93	50	72	87
23.2438	72	39	76	93
23.2633	71	32	64	70
23.2828	81	41	62	78
23.3023	64	25	57	90
23.3218	89	49	57	88
23.3413	83	44	60	82
23.3608	97	51	69	77
23.3804	74	42	80	81
23.3999	97	39	76	80
23.4194	80	41	65	76
23.4389	74	40	68	95
23.4584	82	50	57	76
23.4779	78	38	76	86
23.4974	85	43	62	95
23.5169	84	45	61	74
23.5364	87	45	80	80
23.556	80	34	66	76
23.5755	76	32	60	87
23.595	75	44	56	96
23.6145	80	44	61	81
23.634	72	44	66	78
23.6535	73	40	61	77
23.673	76	40	52	79
23.6926	78	39	58	89
23.7121	64	49	51	99
23.7316	82	44	55	72
23.7511	70	52	61	106
23.7706	77	32	69	77
23.7901	66	32	68	73
23.8096	70	30	61	84
23.8291	85	37	69	65
23.8486	82	37	61	68
23.8682	68	33	58	77
23.8877	69	40	70	74
23.9072	84	36	66	84
23.9267	55	33	60	76
23.9462	66	44	55	75
23.9657	62	35	59	67
23.9852	68	39	63	65
24.0047	74	36	57	76
24.0243	81	39	57	74
24.0438	81	38	54	66
24.0633	63	39	56	66
24.0828	70	45	48	67
24.1023	71	37	53	66
24.1218	63	39	69	65
24.1413	63	34	47	59
24.1608	75	40	51	78
24.1804	71	30	54	78
24.1999	62	32	53	67
24.2194	67	44	54	65
24.2389	78	46	40	65
24.2584	67	33	65	82
24.2779	67	33	63	62
24.2974	72	41	57	72
24.3169	63	32	67	71
24.3364	65	38	64	69
24.356	71	38	54	70
24.3755	83	24	50	72
24.395	74	27	57	67
24.4145	65	25	62	67
24.434	69	21	57	81
24.4535	76	35	51	62
24.473	70	37	56	66
24.4926	54	29	58	82
24.5121	62	25	50	59
24.5316	66	31	58	77
24.5511	72	34	73	78
24.5706	74	31	60	65
24.5901	71	31	50	65
24.6096	79	30	67	65
24.6291	66	34	49	75
24.6486	52	34	37	88
24.6682	56	26	67	77
24.6877	61	43	61	65
24.7072	57	40	41	63
24.7267	65	31	49	84
24.7462	49	37	60	63
24.7657	57	33	84	64
24.7852	64	36	55	82
24.8047	47	39	58	71
24.8242	39	48	55	71
24.8438	56	40	55	88
24.8633	68	36	61	64
24.8828	56	41	49	71
24.9023	56	32	52	72
24.9218	60	43	58	80
24.9413	62	35	57	68
24.9608	74	36	76	73
24.9804	49	42	46	64
24.9999	53	39	51	79
25.0194	67	30	48	66
25.0389	67	41	48	63
25.0584	46	28	53	50
25.0779	47	27	51	57
25.0974	63	31	47	75
25.1169	54	26	53	60
25.1364	56	26	56	50
25.156	48	26	66	72
25.1755	61	43	46	59
25.195	56	21	44	72
25.2145	60	28	55	67
25.234	67	36	51	50
25.2535	59	21	56	63
25.273	64	32	46	63
25.2925	61	24	56	50
25.312	62	22	46	64
25.3316	58	41	58	58
25.3511	64	33	56	61
25.3706	50	30	30	62
25.3901	49	26	49	54
25.4096	57	30	58	73
25.4291	48	26	52	65
25.4486	52	26	41	56
25.4682	58	32	51	60
25.4877	40	32	53	68
25.5072	65	22	34	66
25.5267	54	35	46	69
25.5462	54	37	48	61
25.5657	68	26	46	55
25.5852	51	22	54	50
25.6047	46	29	49	65
25.6242	63	28	55	63
25.6438	53	38	51	49
25.6633	59	29	40	71
25.6828	72	29	40	51
25.7023	48	32	46	42
25.7218	55	33	53	53
25.7413	33	38	42	53
25.7608	50	30	41	48
25.7803	55	44	58	64
25.7998	51	37	42	53
25.8194	54	29	42	48
25.8389	57	38	56	56
25.8584	52	39	40	50
25.8779	44	39	52	65
25.8974	54	28	59	59
25.9169	55	27	75	59
25.9364	44	27	43	64
25.956	68	21	54	54
25.9755	56	23	50	51
25.995	63	28	50	59
26.0145	51	38	51	52
26.034	52	25	44	48
26.0535	42	26	39	68
26.073	54	31	55	59
26.0925	51	27	44	46
26.112	59	25	46	60
26.1316	42	26	43	46
26.1511	55	24	44	43
26.1706	53	31	45	57
26.1901	47	25	44	51
26.2096	58	25	33	54
26.2291	42	29	45	50
26.2486	52	27	51	58
26.2681	59	25	42	47
26.2877	46	30	45	60
26.3072	52	34	42	50
26.3267	47	30	37	41
26.3462	47	26	37	37
26.3657	47	28	51	50
26.3852	55	31	45	39
26.4047	55	25	40	60
26.4242	44	25	33	63
26.4438	49	26	36	48
26.4633	52	29	30	53
26.4828	43	26	41	41
26.5023	45	25	47	48
26.5218	53	26	45	50
26.5413	47	35	38	54
26.5608	42	28	41	53
26.5803	49	16	35	55
26.5998	49	26	50	49
26.6194	49	27	38	59
26.6389	40	21	59	61
26.6584	32	21	40	45
26.6779	45	17	42	42
26.6974	44	27	39	53
26.7169	43	24	37	41
26.7364	54	31	49	57
26.7559	44	29	42	47
26.7755	53	29	52	37
26.795	59	21	24	54
26.8145	46	24	48	58
26.834	52	30	46	55
26.8535	42	23	47	54
26.873	58	26	44	61
26.8925	44	26	44	62
26.912	39	38	50	62
26.9316	43	29	59	60
26.9511	32	21	40	75
26.9706	63	35	44	64
26.9901	50	30	39	62
27.0096	52	28	51	37
27.0291	41	35	44	51
27.0486	54	25	43	67
27.0681	49	27	40	64
27.0877	50	31	36	56
27.1072	50	38	35	61
27.1267	41	27	47	48
27.1462	49	20	43	51
27.1657	48	23	40	54
27.1852	45	29	52	43
27.2047	48	26	48	51
27.2242	38	26	50	57
27.2437	30	19	35	55
27.2633	43	23	42	45
27.2828	56	25	42	45
27.3023	46	28	43	49
27.3218	55	20	36	51
27.3413	42	23	24	40
27.3608	38	33	30	42
27.3803	33	19	36	53
27.3998	51	27	39	45
27.4194	43	30	41	52
27.4389	44	21	33	56
27.4584	40	24	37	51
27.4779	44	21	30	49
27.4974	35	34	37	48
27.5169	44	24	40	39
27.5364	31	28	44	50
27.5559	47	16	39	55
27.5755	41	26	43	40
27.595	45	26	28	45
27.6145	44	23	47	40
27.634	51	25	32	50
27.6535	52	25	41	48
27.673	53	22	43	45
27.6925	41	18	33	55
27.712	44	23	35	47
27.7315	42	23	38	51
27.7511	44	21	31	44
27.7706	38	26	38	43
27.7901	43	17	31	46
27.8096	46	15	39	38
27.8291	45	22	47	58
27.8486	40	21	42	38
27.8681	45	23	46	31
27.8877	50	20	30	41
27.9072	40	27	33	42
27.9267	35	29	30	45
27.9462	45	17	52	42
27.9657	45	29	33	54
27.9852	42	27	36	51
28.0047	39	18	30	40
28.0242	38	26	43	59
28.0437	42	25	31	37
28.0633	32	21	42	44
28.0828	36	25	29	41
28.1023	43	32	35	49
28.1218	39	24	43	47
28.1413	49	26	34	49
28.1608	39	27	45	34
28.1803	37	23	37	49
28.1998	47	26	33	42
28.2193	43	20	32	52
28.2389	53	24	26	40
28.2584	44	21	39	40
28.2779	46	36	45	37
28.2974	40	28	38	50
28.3169	42	25	35	42
28.3364	63	19	42	43
28.3559	45	26	32	38
28.3755	47	19	28	49
28.395	39	20	38	41
28.4145	50	21	41	48
28.434	44	20	39	53
28.4535	48	19	39	36
28.473	39	22	29	51
28.4925	37	21	29	53
28.512	46	29	29	61
28.5315	48	20	42	41
28.5511	57	23	35	59
28.5706	43	22	43	48
28.5901	39	12	44	43
28.6096	43	34	29	37
28.6291	33	24	35	38
28.6486	34	25	35	47
28.6681	52	24	37	38
28.6876	49	33	36	49
28.7071	39	22	41	36
28.7267	40	18	36	45
28.7462	52	19	39	45
28.7657	41	25	35	52
28.7852	47	20	37	30
28.8047	35	20	30	47
28.8242	44	25	35	44
28.8437	41	24	33	44
28.8633	41	25	36	43
28.8828	48	26	33	48
28.9023	30	28	37	45
28.9218	39	15	33	40
28.9413	38	23	35	40
28.9608	31	26	39	49
28.9803	40	22	32	62
28.9998	54	14	45	50
29.0193	44	23	45	49
29.0389	44	16	44	46
29.0584	38	22	48	48
29.0779	41	27	39	46
29.0974	43	21	36	57
29.1169	40	24	41	50
29.1364	33	21	34	41
29.1559	41	41	28	41
29.1754	47	15	27	54
29.1949	50	21	33	48
29.2145	51	17	50	42
29.234	36	26	35	33
29.2535	46	23	36	42
29.273	34	12	38	41
29.2925	31	25	32	33
29.312	52	24	32	45
29.3315	47	13	37	47
29.3511	45	17	31	40
29.3706	49	27	35	54
29.3901	45	27	32	51
29.4096	45	18	41	52
29.4291	49	20	35	44
29.4486	30	18	37	34
29.4681	41	31	49	43
29.4876	37	20	32	50
29.5071	31	18	27	44
29.5267	49	19	28	41
29.5462	43	21	26	44
29.5657	33	22	27	43
29.5852	48	32	42	46
29.6047	52	19	35	45
29.6242	41	26	36	47
29.6437	47	19	47	34
29.6632	41	24	42	43
29.6828	58	29	49	42
29.7023	43	26	35	55
29.7218	48	26	39	39
29.7413	40	15	37	40
29.7608	46	19	47	70
29.7803	38	20	29	49
29.7998	33	26	30	50
29.8193	36	24	37	57
29.8389	38	25	33	46
29.8584	44	23	42	56
29.8779	38	23	45	45
29.8974	44	32	38	50
29.9169	45	26	35	50
29.9364	42	22	38	54
29.9559	43	29	38	52
29.9754	47	24	43	45
29.9949	42	18	35	61
30.0145	52	22	42	58
30.034	46	25	23	54
30.0535	33	25	35	58
30.073	43	16	41	57
30.0925	46	31	39	62
30.112	35	21	40	55
30.1315	30	29	41	52
30.151	37	20	42	52
30.1706	43	25	34	43
30.1901	47	20	33	40
30.2096	39	28	33	52
30.2291	44	15	40	46
30.2486	47	21	33	55
30.2681	42	22	32	45
30.2876	44	22	31	40
30.3071	39	28	34	48
30.3267	34	25	27	51
30.3462	53	27	41	34
30.3657	43	21	36	40
30.3852	45	14	37	41
30.4047	41	21	41	51
30.4242	40	19	31	51
30.4437	50	28	33	45
30.4632	33	20	37	44
30.4827	39	19	36	38
30.5023	45	26	35	48
30.5218	46	20	34	37
30.5413	34	22	33	43
30.5608	41	23	25	42
30.5803	55	27	24	50
30.5998	47	30	37	49
30.6193	39	25	37	47
30.6389	44	17	36	35
30.6584	38	22	41	40
30.6779	47	31	33	48
30.6974	43	31	43	47
30.7169	50	25	36	45
30.7364	50	19	38	41
30.7559	40	21	25	43
30.7754	38	22	32	47
30.7949	41	20	34	47
30.8145	39	22	40	46
30.834	35	29	34	42
30.8535	36	24	34	56
30.873	53	22	31	50
30.8925	39	26	33	47
30.912	49	17	37	63
30.9315	37	21	37	47
30.951	32	18	40	48
30.9705	36	18	34	47
30.9901	46	29	35	55
31.0096	35	23	35	46
31.0291	38	24	32	48
31.0486	42	21	43	39
31.0681	29	20	30	54
31.0876	31	23	46	50
31.1071	43	23	26	47
31.1267	47	32	28	46
31.1462	54	22	27	48
31.1657	43	20	35	40
31.1852	42	17	29	42
31.2047	28	25	33	45
31.2242	41	18	36	39
31.2437	52	17	42	49
31.2632	33	19	41	44
31.2827	28	23	40	46
31.3023	50	17	32	44
31.3218	36	35	45	57
31.3413	43	24	37	33
31.3608	42	21	33	37
31.3803	36	27	48	55
31.3998	37	17	27	40
31.4193	50	21	30	39
31.4388	46	20	28	51
31.4583	40	21	27	24
31.4779	35	23	40	51
31.4974	56	23	51	49
31.5169	39	20	41	52
31.5364	42	25	30	47
31.5559	49	23	33	46
31.5754	58	16	34	56
31.5949	56	27	40	34
31.6145	44	26	38	50
31.634	37	16	54	44
31.6535	44	22	40	39
31.673	49	26	47	41
31.6925	51	17	48	43
31.712	51	22	46	51
31.7315	58	25	44	51
31.751	31	17	45	45
31.7706	38	23	44	44
31.7901	52	20	33	48
31.8096	51	24	32	47
31.8291	46	16	32	46
31.8486	36	18	46	56
31.8681	41	18	35	61
31.8876	37	25	28	46
31.9071	61	29	39	37
31.9266	42	16	48	41
31.9461	36	26	48	43
31.9657	38	24	35	35
31.9852	39	17	30	47
32.0047	36	24	33	38
32.0242	29	23	37	49
32.0437	40	22	37	56
32.0632	34	12	31	53
32.0827	33	22	30	57
32.1022	44	21	42	49
32.1218	38	24	30	48
32.1413	32	16	30	59
32.1608	34	16	25	40
32.1803	34	23	22	39
32.1998	53	21	34	41
32.2193	41	16	32	47
32.2388	28	19	47	50
32.2584	44	14	36	45
32.2779	42	16	38	43
32.2974	41	25	40	39
32.3169	28	31	41	46
32.3364	33	21	35	46
32.3559	49	27	33	38
32.3754	41	28	27	34
32.3949	34	17	29	32
32.4144	33	18	32	54
32.434	43	22	36	28
32.4535	45	14	40	45
32.473	42	19	34	50
32.4925	38	22	29	41
32.512	29	20	34	40
32.5315	38	25	32	49
32.551	37	20	32	46
32.5705	38	19	30	50
32.59	35	24	32	43
32.6096	32	25	36	55
32.6291	42	17	41	54
32.6486	51	18	37	44
32.6681	42	18	37	38
32.6876	40	21	36	80
32.7071	44	29	38	42
32.7266	49	13	42	45
32.7462	46	18	40	47
32.7657	28	24	37	42
32.7852	50	22	41	40
32.8047	41	14	37	44
32.8242	32	21	22	47
32.8437	36	24	32	46
32.8632	41	25	38	38
32.8827	44	22	32	43
32.9022	31	17	31	53
32.9218	31	13	42	52
32.9413	31	24	34	51
32.9608	41	18	28	47
32.9803	39	19	23	40
32.9998	34	26	30	45
33.0193	34	22	35	48
33.0388	44	26	34	45
33.0583	33	22	38	44
33.0778	28	17	45	44
33.0974	42	14	34	35
33.1169	31	19	36	58
33.1364	32	21	36	38
33.1559	33	29	27	46
33.1754	36	27	27	51
33.1949	29	25	35	49
33.2144	44	25	27	40
33.234	40	17	31	36
33.2535	40	21	32	38
33.273	30	20	28	37
33.2925	34	18	31	34
33.312	37	15	32	50
33.3315	32	19	33	45
33.351	37	20	37	50
33.3705	35	25	45	42
33.3901	40	16	27	32
33.4096	43	16	37	48
33.4291	36	13	34	38
33.4486	37	23	40	31
33.4681	21	24	30	37
33.4876	39	21	31	41
33.5071	40	14	22	34
33.5266	42	18	32	38
33.5461	34	18	38	58
33.5656	46	25	34	33
33.5852	34	17	42	36
33.6047	33	22	39	43
33.6242	43	20	26	53
33.6437	45	17	26	44
33.6632	34	15	42	41
33.6827	39	18	28	55
33.7022	44	17	24	45
33.7218	34	28	38	33
33.7413	39	15	28	38
33.7608	35	19	32	41
33.7803	30	18	31	41
33.7998	49	21	22	39
33.8193	29	16	31	43
33.8388	33	18	29	35
33.8583	28	16	31	33
33.8779	37	21	27	36
33.8974	42	25	33	37
33.9169	35	21	28	48
33.9364	49	19	30	45
33.9559	43	23	30	31
33.9754	46	22	31	51
33.9949	50	27	29	58
34.0144	39	18	27	45
34.0339	37	25	28	41
34.0535	27	19	31	42
34.073	40	21	28	34
34.0925	42	14	26	41
34.112	41	15	45	41
34.1315	37	19	26	31
34.151	36	16	33	53
34.1705	32	28	32	42
34.19	30	24	23	41
34.2096	36	20	27	45
34.2291	37	13	38	47
34.2486	44	24	31	48
34.2681	37	20	29	46
34.2876	38	20	25	48
34.3071	31	21	24	45
34.3266	44	20	23	54
34.3461	31	14	32	29
34.3657	32	19	35	40
34.3852	37	25	32	37
34.4047	37	20	32	51
34.4242	37	21	36	51
34.4437	29	26	25	40
34.4632	42	15	39	38
34.4827	31	16	24	37
34.5022	42	24	28	28
34.5217	28	14	29	36
34.5413	38	17	30	35
34.5608	38	18	36	45
34.5803	30	21	24	34
34.5998	25	19	30	32
34.6193	31	16	28	37
34.6388	24	23	31	42
34.6583	32	22	33	40
34.6778	37	21	32	48
34.6974	47	19	30	44
34.7169	37	21	27	47
34.7364	38	22	24	43
34.7559	31	18	18	32
34.7754	33	15	34	47
34.7949	44	19	38	43
34.8144	39	19	23	49
34.8339	36	20	28	50
34.8535	39	25	31	43
34.873	29	14	28	52
34.8925	41	19	31	35
34.912	40	19	34	37
34.9315	45	23	36	32
34.951	25	13	35	43
34.9705	32	21	22	41
34.99	45	9	31	29
35.0095	37	17	21	47
35.0291	34	14	38	34
35.0486	36	13	37	40
35.0681	37	29	24	37
35.0876	35	25	28	46
35.1071	33	27	29	35
35.1266	33	26	25	45
35.1461	36	21	31	45
35.1656	40	22	40	44
35.1852	35	17	21	47
35.2047	27	31	28	44
35.2242	41	27	26	45
35.2437	36	12	24	45
35.2632	35	16	37	43
35.2827	34	19	40	38
35.3022	31	19	23	44
35.3217	19	18	31	38
35.3413	26	12	31	43
35.3608	36	22	27	37
35.3803	31	27	26	27
35.3998	35	20	40	51
35.4193	37	21	22	47
35.4388	33	21	19	40
35.4583	40	22	28	39
35.4778	31	12	37	44
35.4973	24	14	29	34
35.5169	36	24	34	37
35.5364	30	17	22	32
35.5559	48	17	31	33
35.5754	38	16	30	34
35.5949	29	18	33	30
35.6144	22	24	18	39
35.6339	31	11	29	49
35.6534	44	18	16	38
35.673	33	14	21	27
35.6925	18	17	29	47
35.712	47	34	32	41
35.7315	26	15	29	38
35.751	29	17	27	36
35.7705	38	18	32	25
35.79	30	30	36	42
35.8095	33	17	27	47
35.8291	39	19	29	36
35.8486	31	19	35	43
35.8681	38	20	33	36
35.8876	45	18	21	36
35.9071	32	22	25	33
35.9266	39	13	24	38
35.9461	41	19	27	44
35.9656	22	10	32	41
35.9851	24	21	33	37
36.0047	21	18	28	34
36.0242	38	14	24	42
36.0437	34	16	28	35
36.0632	31	11	38	34
36.0827	34	21	34	34
36.1022	33	11	33	31
36.1217	29	18	23	37
36.1412	33	22	35	41
36.1608	31	19	32	44
36.1803	36	15	33	34
36.1998	42	21	27	45
36.2193	39	20	23	38
36.2388	26	14	22	26
36.2583	32	19	35	31
36.2778	28	15	35	30
36.2973	23	18	26	37
36.3169	43	15	23	30
36.3364	28	18	21	39
36.3559	35	11	24	41
36.3754	28	21	31	43
36.3949	35	23	26	22
36.4144	35	17	32	30
36.4339	32	19	25	34
36.4534	25	13	33	32
36.4729	36	19	20	42
36.4925	34	15	33	44
36.512	22	20	27	37
36.5315	24	12	24	32
36.551	25	27	26	32
36.5705	38	24	36	35
36.59	27	12	17	39
36.6095	32	14	36	37
36.629	24	22	25	41
36.6486	35	18	21	36
36.6681	35	20	22	42
36.6876	32	16	24	37
36.7071	34	16	32	42
36.7266	22	17	28	28
36.7461	40	19	26	42
36.7656	37	19	33	37
36.7851	28	20	30	37
36.8047	23	21	15	40
36.8242	28	16	34	37
36.8437	32	14	30	41
36.8632	28	15	27	29
36.8827	43	13	40	41
36.9022	28	19	23	31
36.9217	41	24	30	56
36.9412	26	20	32	28
36.9607	25	26	37	25
36.9803	27	15	32	43
36.9998	45	21	31	30
37.0193	41	17	29	45
37.0388	30	14	29	38
37.0583	33	31	34	27
37.0778	39	16	28	31
37.0973	23	14	31	29
37.1168	33	16	27	30
37.1364	31	17	16	45
37.1559	40	26	21	31
37.1754	29	13	29	33
37.1949	25	9	21	37
37.2144	24	18	29	36
37.2339	19	20	28	27
37.2534	30	16	27	37
37.273	32	24	32	32
37.2925	26	24	26	31
37.312	34	16	21	24
37.3315	22	17	27	36
37.351	25	15	33	37
37.3705	25	12	18	27
37.39	32	16	35	31
37.4095	32	21	31	29
37.429	35	17	21	31
37.4485	31	16	35	26
37.4681	31	15	30	36
37.4876	35	16	32	30
37.5071	23	14	18	42
37.5266	27	17	37	37
37.5461	34	21	33	39
37.5656	31	12	34	20
37.5851	21	20	29	39
37.6046	36	18	23	36
37.6242	29	11	30	45
37.6437	28	13	20	40
37.6632	41	16	25	36
37.6827	24	15	22	34
37.7022	30	18	22	31
37.7217	28	23	30	28
37.7412	25	15	29	32
37.7608	32	10	19	39
37.7803	30	13	26	30
37.7998	41	18	20	36
37.8193	28	18	25	36
37.8388	30	20	21	33
37.8583	26	26	25	38
37.8778	45	16	33	27
37.8973	32	16	24	32
37.9168	32	15	26	38
37.9364	37	8	26	34
37.9559	25	13	31	35
37.9754	28	16	30	25
37.9949	29	11	19	39
38.0144	18	18	28	30
38.0339	27	17	12	42
38.0534	34	17	23	29
38.0729	34	17	27	31
38.0924	28	21	27	33
38.112	23	19	19	29
38.1315	30	16	23	36
38.151	33	21	24	35
38.1705	27	9	20	28
38.19	34	8	20	35
38.2095	33	18	23	27
38.229	33	22	30	40
38.2486	29	14	31	36
38.2681	25	18	22	25
38.2876	33	14	31	34
38.3071	21	12	20	41
38.3266	28	17	21	31
38.3461	22	21	21	35
38.3656	35	19	18	21
38.3851	26	18	34	30
38.4046	38	12	28	36
38.4242	33	16	25	32
38.4437	28	13	29	32
38.4632	32	13	19	35
38.4827	24	15	30	34
38.5022	27	23	26	36
38.5217	23	22	22	26
38.5412	28	17	23	31
38.5607	23	12	20	32
38.5803	25	12	26	33
38.5998	33	19	33	33
38.6193	23	18	26	31
38.6388	28	11	23	34
38.6583	33	12	29	24
38.6778	27	22	24	28
38.6973	29	20	28	31
38.7168	25	13	29	36
38.7364	34	17	17	26
38.7559	21	15	26	26
38.7754	27	10	29	21
38.7949	34	16	28	38
38.8144	25	12	19	34
38.8339	17	9	18	30
38.8534	28	17	20	34
38.8729	29	14	32	35
38.8924	22	17	26	46
38.912	20	16	23	26
38.9315	23	18	28	28
38.951	28	12	22	32
38.9705	27	15	22	36
38.99	33	19	39	18
39.0095	33	15	36	46
39.029	28	14	18	39
39.0485	25	14	23	31
39.0681	21	9	20	38
39.0876	25	23	19	29
39.1071	30	16	23	39
39.1266	34	10	27	35
39.1461	32	21	33	36
39.1656	33	17	35	29
39.1851	24	25	31	24
39.2046	29	10	24	23
39.2242	40	12	18	27
39.2437	38	18	32	47
39.2632	28	21	17	35
39.2827	31	20	34	26
39.3022	25	17	18	37
39.3217	22	18	19	30
39.3412	22	13	22	25
39.3607	30	14	21	34
39.3802	34	13	19	48
39.3998	24	17	27	23
39.4193	31	12	18	28
39.4388	28	15	24	19
39.4583	24	13	25	37
39.4778	21	16	26	24
39.4973	26	12	24	33
39.5168	33	21	28	26
39.5363	25	10	18	30
39.5559	30	11	26	25
39.5754	23	12	28	26
39.5949	27	13	23	30
39.6144	24	14	24	36
39.6339	32	7	15	28
39.6534	22	12	23	30
39.6729	32	14	12	30
39.6924	37	21	19	37
39.712	18	13	23	29
39.7315	31	15	26	24
39.751	23	10	24	27
39.7705	18	15	23	39
39.79	27	10	29	39
39.8095	34	9	27	39
39.829	31	26	26	28
39.8485	26	10	34	36
39.868	36	12	18	25
39.8876	29	12	28	28
39.9071	27	17	20	30
39.9266	22	16	15	27
39.9461	35	14	22	32
39.9656	24	19	17	21
39.9851	20	19	21	33
40.0046	28	11	30	24

## Sheet: Fig. 2l
P-PLA		MRSD-PLA2		MRSD-PLA4		MRSD-PLA6		ZIF-8
x-axis-P/P0	y-axis-Quantity Adsorbed (cm3/g)	x-axis-P/P0	y-axis-Quantity Adsorbed (cm3/g)	x-axis-P/P0	y-axis-Quantity Adsorbed (cm3/g)	x-axis-P/P0	y-axis-Quantity Adsorbed (cm3/g)	x-axis-P/P0	y-axis-Quantity Adsorbed (cm3/g)
0.0106	2.5854	2e-09	0.00016	2.02e-09	0.00019965	2.01e-09	0.00026406	0.00965	303.387
0.03437	3.64458	6.08e-07	0.00939	6.1408e-07	0.01172	6.1104e-07	0.0155	0.0306	364.154
0.05747	4.19902	1.536e-06	0.0613	1.55136e-06	0.07649	1.54368e-06	0.10116	0.05588	366.881
0.08511	4.76151	1.9853e-05	0.8248	2.00515e-05	1.0292	1.99523e-05	1.36123	0.09298	367.886
0.12013	5.35656	4.4614e-05	1.77571	4.50601e-05	2.21576	4.48371e-05	2.93059	0.12358	368.443
0.15508	5.71386	8.7764e-05	3.6515	8.86416e-05	4.55639	8.82028e-05	6.02636	0.15728	368.957
0.19003	6.04392	0.000105631	4.55315	0.000106687	5.68148	0.000106159	7.51442	0.19227	369.42
0.22492	6.39075	0.00013807	6.44742	0.000139451	8.04518	0.00013876	10.6407	0.22754	369.85
0.2598	6.72419	0.000175528	9.17158	0.000177283	11.4444	0.000176406	15.1366	0.2628	370.234
0.29471	6.98344	0.000217712	12.9152	0.000219889	16.1157	0.000218801	21.3149	0.2981	370.629
0.32985	7.11119	0.000265944	17.4857	0.000268603	21.8189	0.000267274	28.8581	0.33334	370.985
0.38418	7.38904	0.000323067	22.1046	0.000326298	27.5825	0.000324682	36.481	0.36856	371.31
0.41906	7.7009	0.000414965	26.8534	0.000419115	33.508	0.00041704	44.3182	0.40368	371.691
0.45408	7.77263	0.000589525	31.5656	0.00059542	39.3879	0.000592473	52.0951	0.43915	372.075
0.489	7.93133	0.000784448	34.5448	0.000792292	43.1054	0.00078837	57.0119	0.47444	372.443
0.52392	7.92856	0.000978516	36.4791	0.000988301	45.519	0.000983409	60.2042	0.50977	372.808
0.55893	8.12685	0.00148	39.4855	0.0015	49.2705	0.00149	65.166	0.54523	373.118
0.59383	8.18728	0.00263	42.3527	0.00266	52.8483	0.00264	69.898	0.5804	373.532
0.62897	8.12999	0.00558	45.2538	0.00563	56.4683	0.00561	74.6859	0.61592	373.869
0.66383	8.13298	0.00596	49.3482	0.00602	61.5773	0.00599	81.4432	0.65107	374.256
0.69875	8.35606	0.00753	51.3166	0.00761	64.0335	0.00757	84.6917	0.68656	374.697
0.73378	8.41944	0.01196	53.1135	0.01208	66.2757	0.01202	87.6574	0.72204	375.11
0.76884	8.4197	0.02415	56.1187	0.02439	70.0257	0.02427	92.6171	0.75718	375.59
0.80392	8.2696	0.0325	62.2634	0.03283	77.6931	0.03266	102.758	0.79263	376.146
0.83873	8.89706	0.08701	63.4941	0.08788	79.2288	0.08744	104.789	0.828	376.82
0.85474	9.59861	0.10305	63.6099	0.10408	79.3733	0.10357	104.98	0.86334	377.669
0.89001	10.1239	0.1305	63.7642	0.1318	79.5658	0.13115	105.235	0.89859	378.845
0.94345	12.8641	0.14976	63.8514	0.15125	79.6746	0.15051	105.379	0.93343	380.885
0.95994	15.3284	0.17723	63.9604	0.179	79.8106	0.17812	105.559	0.96713	385.312
0.99319	25.8685	0.20245	64.0528	0.20447	79.9259	0.20346	105.711	0.98426	391.221
0.99573	36.7276	0.22826	64.1363	0.23054	80.0301	0.2294	105.849	0.99303	398.643
0.99819	46.1821	0.2524	64.2108	0.25493	80.1231	0.25366	105.972	0.99799	407.694
0.99824	51.724	0.27832	64.2864	0.2811	80.2174	0.27971	106.097	1.00166	420.405
1.00017	60.6293	0.30303	64.3577	0.30606	80.3064	0.30454	106.215	1.00431	439.347
1.00017	60.6293	0.34338	64.4674	0.34682	80.4432	0.3451	106.395	1.00772	467.852
0.9711	21.8785	0.39541	64.5978	0.39937	80.606	0.39739	106.611	0.98787	467.852
0.94254	14.9971	0.44738	64.7376	0.45185	80.7804	0.44962	106.842	0.94228	386.543
0.90659	12.1006	0.50631	64.895	0.51137	80.9768	0.50884	107.101	0.90241	381.119
0.87128	10.7204	0.55487	65.0315	0.56042	81.1471	0.55765	107.326	0.86391	379.204
0.83625	9.66635	0.5955	65.1494	0.60145	81.2943	0.59847	107.521	0.82854	378.131
0.80086	8.91686	0.65281	65.3331	0.65934	81.5235	0.65608	107.824	0.79342	377.359
0.76605	8.33291	0.69561	65.4796	0.70256	81.7062	0.69908	108.066	0.77727	377.125
0.73091	7.82187	0.74878	65.6884	0.75626	81.9668	0.75252	108.411	0.74277	376.558
0.69591	6.9296	0.79902	65.926	0.80701	82.2633	0.80301	108.803	0.70793	376.038
0.66078	6.58556	0.84818	66.2224	0.85666	82.6332	0.85242	109.292	0.67312	375.628
0.62572	6.29327	0.8966	66.6562	0.90557	83.1745	0.90108	110.008	0.6386	375.237
0.59066	5.83298	0.94734	67.7356	0.95681	84.5213	0.95208	111.789	0.60386	374.821
0.55561	5.64457	0.96977	69.7716	0.97947	87.0618	0.97462	115.149	0.56916	374.413
0.52068	5.2085	0.98027	72.9186	0.99008	90.9887	0.98517	120.343	0.53452	374.014
0.48549	4.91507	0.98736	78.1413	0.99723	97.5057	0.9923	128.963	0.49985	373.655
0.45059	4.46091	0.98827	82.5793	0.99816	103.043	0.99321	136.287	0.46532	373.261
0.41556	4.19573	0.99165	87.3235	1.00156	108.963	0.9966	144.117	0.43059	372.871
0.38053	3.90427	0.99165	87.3235	1.00156	108.963	0.9966	144.117	0.39601	372.448
0.34559	3.30879	0.98542	82.6122	0.99527	103.085	0.99034	136.341	0.36134	372.045
0.31062	2.98951	0.97572	75.0948	0.98547	93.7043	0.98059	123.935	0.32694	371.628
0.27571	2.53903	0.96941	72.15	0.97911	90.0297	0.97426	119.075	0.29223	371.198
0.24065	2.20432	0.96105	69.9537	0.97067	87.2891	0.96586	115.45	0.25752	370.76
0.20564	1.80172	0.91422	67.0799	0.92336	83.7031	0.91879	110.707	0.2229	370.304
0.17064	1.26991	0.84724	66.3242	0.85571	82.7602	0.85148	109.46	0.18826	369.831
0.12064	0.73394	0.79815	66.0239	0.80613	82.3855	0.80214	108.964	0.13882	369.125
0.07064	0.124	0.74653	65.7832	0.754	82.0852	0.75026	108.567
0.0105	2.382	0.69676	65.5881	0.70372	81.8417	0.70024	108.245
		0.64531	65.4117	0.65176	81.6215	0.64854	107.954
		0.59764	65.2634	0.60361	81.4365	0.60062	107.709
		0.54807	65.1194	0.55355	81.2568	0.55081	107.472
		0.49838	64.982	0.50336	81.0854	0.50087	107.245
		0.44916	64.8371	0.45365	80.9046	0.4514	107.006
		0.39745	64.7022	0.40142	80.7362	0.39943	106.783
		0.34827	64.5695	0.35176	80.5706	0.35002	106.564
		0.29886	64.4366	0.30185	80.4048	0.30036	106.345
		0.24874	64.2944	0.25123	80.2274	0.24999	106.11
		0.19906	64.1414	0.20105	80.0364	0.20005	105.857
		0.14968	63.9527	0.15118	79.801	0.15043	105.546
		0.10969	63.7572	0.11079	79.557	0.11024	105.223

## Sheet: Fig. 2m
P-PLA		MRSD-PLA2		MRSD-PLA4		MRSD-PLA6
x-axis-Strain (%)	y-axis-Stress (MPa)	x-axis-Strain (%)	y-axis-Stress (MPa)	x-axis-Strain (%)	y-axis-Stress (MPa)	x-axis-Strain (%)	y-axis-Stress (MPa)
0	0	0	0	0	0	0	0
0	0.106	0	0.098	0.02	0.005	0	0.081
0.02	0.188	0.02	0.119	0.04	0.01	0.02	0.102
0.04	0.235	0.04	0.14	0.09	0.015	0.04	0.123
0.09	0.276	0.09	0.161	0.225	0.05	0.09	0.144
0.225	0.323	0.225	0.182	0.27	0.085	0.225	0.165
0.27	0.392	0.27	0.203	0.31	0.12	0.27	0.186
0.31	0.463	0.31	0.224	0.41	0.155	0.31	0.207
0.41	0.587	0.41	0.245	0.45	0.19	0.41	0.228
0.45	0.644	0.45	0.266	0.51	0.225	0.45	0.249
0.51	0.697	0.51	0.287	0.525	0.26	0.51	0.27
0.525	0.761	0.525	0.308	0.565	0.295	0.525	0.291
0.565	0.843	0.565	0.329	0.611	0.33	0.565	0.312
0.611	0.985	0.611	0.35	0.661	0.365	0.611	0.333
0.661	1.049	0.661	0.371	0.706	0.4	0.661	0.354
0.706	1.119	0.706	0.392	0.756	0.435	0.706	0.375
0.756	1.19	0.756	0.413	0.811	0.47	0.756	0.396
0.811	1.259	0.811	0.434	0.826	0.505	0.811	0.417
0.826	1.376	0.826	0.455	0.861	0.54	0.826	0.438
0.861	1.43	0.861	0.476	0.911	0.575	0.861	0.459
0.911	1.494	0.911	0.497	0.966	0.61	0.911	0.48
0.966	1.576	0.966	0.518	1.016	0.645	0.966	0.501
1.016	1.669	1.016	0.539	1.046	0.68	1.016	0.522
1.046	1.757	1.046	0.56	1.091	0.715	1.046	0.543
1.091	1.868	1.091	0.581	1.111	0.76	1.091	0.564
1.111	1.915	1.111	0.602	1.146	0.817	1.111	0.585
1.146	1.974	1.146	0.623	1.186	0.856	1.146	0.606
1.186	2.038	1.186	0.644	1.216	0.912	1.186	0.627
1.216	2.115	1.216	0.665	1.282	0.988	1.216	0.648
1.282	2.19	1.282	0.686	1.332	1.101	1.282	0.669
1.332	2.26	1.332	0.707	1.357	1.311	1.332	0.69
1.357	2.331	1.357	0.728	1.397	1.418	1.357	0.711
1.397	2.39	1.397	0.749	1.452	1.525	1.397	0.732
1.452	2.495	1.452	0.77	1.497	1.595	1.452	0.753
1.497	2.553	1.497	0.791	1.562	1.696	1.497	0.774
1.562	2.612	1.562	0.886	1.592	1.829	1.562	0.877
1.592	2.682	1.592	0.995	1.612	1.975	1.592	1.042
1.612	2.77	1.612	1.12	1.672	2.133	1.612	1.348
1.672	2.852	1.672	1.286	1.717	2.393	1.672	1.515
1.717	2.934	1.717	1.462	1.772	2.52	1.717	1.68
1.772	3.004	1.772	1.665	1.812	2.69	1.772	1.815
1.812	3.091	1.812	1.861	1.857	2.873	1.812	2.024
1.857	3.232	1.857	2.058	1.897	3.088	1.857	2.226
1.897	3.303	1.897	2.247	1.952	3.315	1.897	2.575
1.952	3.374	1.952	2.525	2.027	3.512	1.952	2.746
2.027	3.49	2.027	2.715	2.082	3.702	2.027	2.925
2.082	3.56	2.082	2.905	2.133	4.05	2.082	3.115
2.133	3.637	2.133	3.089	2.163	4.277	2.133	3.334
2.163	3.718	2.163	3.449	2.203	4.506	2.163	3.697
2.203	3.86	2.203	3.57	2.283	4.771	2.203	3.832
2.283	3.917	2.283	3.702	2.313	5.075	2.283	3.966
2.313	3.982	2.313	3.866	2.358	5.321	2.313	4.119
2.358	4.053	2.358	4.056	2.413	5.733	2.358	4.303
2.413	4.134	2.413	4.391	2.443	5.891	2.413	4.61
2.443	4.205	2.443	4.53	2.478	6.043	2.443	4.752
2.478	4.298	2.478	4.651	2.518	6.251	2.478	4.911
2.518	4.38	2.518	4.797	2.563	6.498	2.518	5.07
2.563	4.439	2.563	4.961	2.603	6.738	2.563	5.376
2.603	4.544	2.603	5.12	2.653	7.118	2.603	5.529
2.653	4.584	2.653	5.29	2.713	7.252	2.653	5.694
2.713	4.644	2.713	5.449	2.779	7.41	2.713	5.818
2.779	4.714	2.779	5.625	2.814	7.573	2.779	5.964
2.814	4.802	2.814	5.808	2.859	7.758	2.814	6.094
2.859	4.942	2.859	6.106	2.884	7.929	2.859	6.24
2.884	4.989	2.884	6.264	2.934	8.08	2.884	6.375
2.934	5.047	2.934	6.422	3.014	8.214	2.934	6.504
3.014	5.123	3.014	6.72	3.049	8.276	3.014	6.627
3.049	5.211	3.049	6.897	3.084	8.339	3.049	6.731
3.084	5.375	3.084	7.049	3.114	8.429	3.084	6.84
3.114	5.445	3.114	7.251	3.164	8.517	3.114	6.951
3.164	5.499	3.164	7.353	3.209	8.598	3.164	7.111
3.209	5.563	3.209	7.454	3.254	8.764	3.209	7.22
3.254	5.632	3.254	7.58	3.314	8.946	3.254	7.318
3.314	5.703	3.314	7.733	3.339	9.257	3.314	7.417
3.339	5.78	3.339	7.865	3.369	9.415	3.339	7.57
3.369	5.843	3.369	8.03	3.424	9.592	3.369	7.607
3.424	5.92	3.424	8.194	3.474	9.788	3.424	7.631
3.474	6.002	3.474	8.346	3.504	9.991	3.474	7.656
3.504	6.084	3.504	8.492	3.539	10.193	3.504	7.693
3.539	6.219	3.539	8.638	3.594	10.414	3.539	7.736
3.594	6.266	3.594	8.751	3.645	10.592	3.594	7.772
3.645	6.335	3.645	8.839	3.665	10.738	3.645	7.822
3.665	6.405	3.665	8.929	3.7	11.016	3.665	7.87
3.7	6.558	3.7	9.061	3.745	11.123	3.7	7.913
3.745	6.633	3.745	9.136	3.83	11.212	3.745	7.956
3.83	6.681	3.83	9.238	3.875	11.327	3.83	8.018
3.875	6.74	3.875	9.326	3.915	11.459	3.875	8.073
3.915	6.821	3.915	9.522	3.935	11.572	3.915	8.122
3.935	6.879	3.935	9.624	3.985	11.762	3.935	8.214
3.985	7.003	3.985	9.7	4.035	11.826	3.985	8.251
4.035	7.073	4.035	9.783	4.085	11.882	4.035	8.293
4.085	7.132	4.085	9.838	4.115	11.946	4.085	8.331
4.115	7.196	4.115	9.876	4.17	12.022	4.115	8.391
4.17	7.284	4.17	9.89	4.21	12.073	4.17	8.416
4.21	7.402	4.21	9.908	4.261	12.135	4.21	8.428
4.261	7.46	4.261	9.965	4.301	12.199	4.261	8.441
4.301	7.529	4.301	10.06	4.351	12.262	4.301	8.453
4.351	7.589	4.351	10.099	4.396	12.312	4.351	8.459
4.396	7.64	4.396	10.098	4.436	12.375	4.396	8.458
4.436	7.676	4.436	10.028	4.501	12.414	4.436	8.472
4.501	7.688	4.501	10.004	4.551	12.452	4.501	8.484
4.551	7.681	4.551	10.03	4.601	12.478	4.551	8.508
4.601	7.671	4.601	10.161	4.636	12.516	4.601	8.532
4.636	7.682	4.636	10.283	4.666	12.566	4.636	8.544
4.666	7.705	4.666	10.358	4.696	12.592	4.666	8.57
4.696	7.747	4.696	10.453	4.746	12.629	4.696	8.6
4.746	7.805	4.746	10.553	4.786	12.655	4.746	8.624
4.786	7.875	4.786	10.636	4.826	12.718	4.786	8.662
4.826	7.934	4.826	10.712	4.891	12.743	4.826	8.704
4.891	7.998	4.891	10.832	4.936	12.768	4.891	8.765
4.936	8.057	4.936	10.883	4.961	12.807	4.936	8.827
4.961	8.121	4.961	10.921	5.006	12.845	4.961	8.9
5.006	8.185	5.006	10.901	5.066	12.901	5.006	8.974
5.066	8.297	5.066	10.864	5.106	12.927	5.066	9.059
5.106	8.35	5.106	10.833	5.157	12.939	5.106	9.207
5.157	8.39	5.157	10.819	5.212	12.965	5.157	9.268
5.212	8.413	5.212	10.833	5.257	12.983	5.212	9.342
5.257	8.448	5.257	10.89	5.282	12.997	5.257	9.41
5.282	8.49	5.282	11.028	5.317	13.008	5.282	9.488
5.317	8.525	5.317	11.092	5.362	13.022	5.317	9.55
5.362	8.56	5.362	11.156	5.407	13.034	5.362	9.617
5.407	8.608	5.407	11.225	5.457	13.041	5.407	9.672
5.457	8.643	5.457	11.306	5.502	13.054	5.457	9.722
5.502	8.678	5.502	11.389	5.552	13.065	5.502	9.795
5.552	8.748	5.552	11.502	5.607	13.078	5.552	9.838
5.607	8.783	5.607	11.529	5.672	13.092	5.607	9.882
5.672	8.83	5.672	11.472	5.702	13.11	5.672	9.917
5.702	8.865	5.702	11.338	5.747	13.148	5.702	9.966
5.747	8.935	5.747	11.211	5.778	13.173	5.747	10.004
5.778	8.97	5.778	11.092	5.853	13.198	5.778	10.041
5.853	9	5.853	11.009	5.888	13.23	5.853	10.065
5.888	9.064	5.888	11.016	5.948	13.243	5.888	10.102
5.948	9.099	5.948	11.117	5.988	13.256	5.948	10.15
5.988	9.123	5.988	11.276	6.013	13.281	5.988	10.169
6.013	9.164	6.013	11.249	6.088	13.307	6.013	10.199
6.088	9.187	6.088	11.225	6.148	13.326	6.088	10.224
6.148	9.222	6.148	11.142	6.168	13.339	6.148	10.249
6.168	9.257	6.168	11.149	6.238	13.362	6.168	10.267
6.238	9.321	6.238	11.243	6.268	13.375	6.238	10.298
6.268	9.35	6.268	11.333	6.328	13.388	6.268	10.334
6.328	9.362	6.328	11.452	6.358	13.401	6.328	10.359
6.358	9.373	6.358	11.642	6.393	13.414	6.358	10.396
6.393	9.397	6.393	11.712	6.438	13.413	6.393	10.445
6.438	9.439	6.438	11.788	6.478	13.413	6.438	10.47
6.478	9.461	6.478	11.838	6.533	13.426	6.478	10.482
6.533	9.485	6.533	11.914	6.568	13.439	6.533	10.494
6.568	9.504	6.568	11.978	6.618	13.47	6.568	10.518
6.618	9.526	6.618	12.06	6.648	13.496	6.618	10.544
6.648	9.562	6.648	12.098	6.694	13.509	6.648	10.58
6.694	9.574	6.694	12.117	6.749	13.528	6.694	10.617
6.749	9.579	6.749	12.155	6.769	13.553	6.749	10.641
6.769	9.591	6.769	12.193	6.839	13.585	6.769	10.654
6.839	9.614	6.839	12.243	6.854	13.597	6.839	10.677
6.854	9.638	6.854	12.281	6.879	13.603	6.854	10.69
6.879	9.684	6.879	12.325	6.939	13.617	6.879	10.702
6.939	9.703	6.939	12.338	6.999	13.629	6.939	10.727
6.999	9.714	6.999	12.337	7.019	13.648	6.999	10.751
7.019	9.726	7.019	12.351	7.059	13.693	7.019	10.775
7.059	9.749	7.059	12.364	7.119	13.691	7.059	10.801
7.119	9.771	7.119	12.389	7.199	13.704	7.119	10.812
7.199	9.79	7.199	12.413	7.239	13.712	7.199	10.831
7.239	9.813	7.239	12.439	7.279	13.729	7.239	10.856
7.279	9.843	7.279	12.477	7.33	13.768	7.279	10.879
7.33	9.866	7.33	12.49	7.355	13.781	7.33	10.892
7.355	9.89	7.355	12.503	7.405	13.8	7.355	10.911
7.405	9.913	7.405	12.527	7.46	13.813	7.405	10.91
7.46	9.925	7.46	12.554	7.51	13.825	7.46	10.91
7.51	9.931	7.51	12.567	7.545	13.851	7.51	10.923
7.545	9.935	7.545	12.585	7.58	13.857	7.545	10.934
7.58	9.954	7.58	12.603	7.61	13.856	7.58	10.959
7.61	9.966	7.61	12.603	7.67	13.87	7.61	10.985
7.67	9.977	7.67	12.616	7.695	13.882	7.67	11.009
7.695	9.984	7.695	12.624	7.72	13.895	7.695	11.033
7.72	9.995	7.72	12.629	7.76	13.921	7.72	11.032
7.76	10.007	7.76	12.642	7.84	13.944	7.76	11.039
7.84	10.019	7.84	12.667	7.855	13.958	7.84	11.052
7.855	10.042	7.855	12.68	7.9	13.995	7.855	11.064
7.9	10.065	7.9	12.679	7.945	14.008	7.9	11.089
7.945	10.071	7.945	12.679	7.99	14.021	7.945	11.095
7.99	10.07	7.99	12.679	8.045	14.033	7.99	11.094
8.045	10.059	8.045	12.693	8.09	14.059	8.045	11.107
8.09	10.047	8.09	12.718	8.12	14.071	8.09	11.106
8.12	10.047	8.12	12.73	8.175	14.084	8.12	11.106
8.175	10.047	8.175	12.755	8.211	14.097	8.175	11.106
8.211	10.047	8.211	12.768	8.301	14.109	8.211	11.118
8.301	10.047	8.301	12.768	8.351	14.109	8.301	11.118
8.351	10.053	8.351	12.781	8.411	14.109	8.351	11.131
8.411	10.065	8.411	12.78	8.456	14.122	8.411	11.143
8.456	10.089	8.456	12.775	8.501	14.134	8.456	11.155
8.501	10.1	8.501	12.75	8.561	14.147	8.501	11.169
8.561	10.129	8.561	12.737	8.636	14.167	8.561	11.18
8.636	10.153	8.636	12.725	8.691	14.18	8.636	11.192
8.691	10.199	8.691	12.712	8.741	14.192	8.691	11.205
8.741	10.223	8.741	12.704	8.781	14.204	8.741	11.217
8.781	10.235	8.781	12.717	8.907	14.211	8.781	11.216
8.907	10.247	8.907	12.717	8.942	14.224	8.907	11.23
8.942	10.258	8.942	12.731	8.967	14.237	8.942	11.242
8.967	10.27	8.967	12.756	9.012	14.235	8.967	11.254
9.012	10.281	9.012	12.768	9.067	14.242	9.012	11.278
9.067	10.293	9.067	12.788	9.172	14.255	9.067	11.278
9.172	10.317	9.172	12.794	9.217	14.254	9.172	11.29
9.217	10.34	9.217	12.793	9.262	14.269	9.217	11.321
9.262	10.363	9.262	12.812	9.292	14.287	9.262	11.346
9.292	10.388	9.292	12.831	9.327	14.286	9.292	11.357
9.327	10.41	9.327	12.85	9.382	14.299	9.327	11.37
9.382	10.423	9.382	12.902	9.477	14.299	9.382	11.364
9.477	10.433	9.477	12.92	9.517	14.299	9.477	11.352
9.517	10.445	9.517	12.933	9.562	14.313	9.517	11.364
9.562	10.458	9.562	12.946	9.602	14.337	9.562	11.363
9.602	10.445	9.602	12.97	9.632	14.35	9.602	11.389
9.632	10.434	9.632	12.97	9.697	14.375	9.632	11.401
9.697	10.411	9.697	12.97	9.733	14.389	9.697	11.408
9.733	10.398	9.733	12.984	9.783	14.387	9.733	11.419
9.783	10.41	9.783	12.997	9.823	14.401	9.783	11.432
9.823	10.422	9.823	13.009	9.883	14.427	9.823	11.456
9.883	10.421	9.883	13.028	9.938	14.438	9.883	11.474
9.938	10.421	9.938	13.053	9.993	14.452	9.938	11.486
9.993	10.411	9.993	13.059	10.043	14.477	9.993	11.498
10.043	10.388	10.043	13.072	10.073	14.489	10.043	11.511
10.073	10.351	10.073	13.09	10.113	14.489	10.073	11.523
10.113	10.328	10.113	13.103	10.218	14.489	10.113	11.535
10.218	10.293	10.218	13.122	10.273	14.501	10.218	11.548
10.273	10.292	10.273	13.135	10.324	14.515	10.273	11.572
10.324	10.299	10.324	13.16	10.364	14.539	10.324	11.597
10.364	10.304	10.364	13.16	10.464	14.553	10.364	11.621
10.464	10.304	10.464	13.167	10.514	14.552	10.464	11.634
10.514	10.287	10.514	13.18	10.549	14.552	10.514	11.633
10.549	10.294	10.549	13.205	10.599	14.552	10.549	11.633
10.599	10.304	10.599	13.23	10.659	14.558	10.599	11.647
10.659	10.317	10.659	13.274	10.684	14.572	10.659	11.658
10.684	10.328	10.684	13.287	10.784	14.585	10.684	11.683
10.784	10.339	10.784	13.286	10.849	14.597	10.784	11.695
10.849	10.335	10.849	13.286	10.889	14.616	10.849	11.707
10.889	10.322	10.889	13.286	10.934	14.615	10.889	11.707
10.934	10.31	10.934	13.286	10.984	14.629	10.934	11.72
10.984	10.31	10.984	13.286	11.049	14.642	10.984	11.731
11.049	10.304	11.049	13.301	11.074	14.654	11.049	11.745
11.074	10.304	11.074	13.313	11.124	14.679	11.074	11.769
11.124	10.3	11.124	13.337	11.189	14.717	11.124	11.775
11.189	10.287	11.189	13.35	11.305	14.716	11.189	11.787
11.305	10.299	11.305	13.35	11.335	14.73	11.305	11.8
11.335	10.311	11.335	13.35	11.38	14.729	11.335	11.812
11.38	10.322	11.38	13.35	11.415	14.729	11.38	11.824
11.415	10.34	11.415	13.35	11.445	14.742	11.415	11.842
11.445	10.339	11.445	13.35	11.52	14.748	11.445	11.842
11.52	10.351	11.52	13.35	11.605	14.762	11.52	11.842
11.605	10.375	11.605	13.357	11.655	14.786	11.605	11.842
11.655	10.386	11.655	13.375	11.695	14.799	11.655	11.83
11.695	10.392	11.695	13.388	11.74	14.806	11.695	11.829
11.74	10.376	11.74	13.4	11.841	14.818	11.74	11.829
11.841	10.352	11.841	13.419	11.906	14.832	11.841	11.829
11.906	10.328	11.906	13.439	11.946	14.857	11.906	11.829
11.946	10.293	11.946	13.451	11.966	14.868	11.946	11.829
11.966	10.246	11.966	13.464	12.016	14.868	11.966	11.829
12.016	10.246	12.016	13.476	12.056	14.868	12.016	11.842
12.056	10.246	12.056	13.483	12.131	14.882	12.056	11.842
12.131	10.258	12.131	13.497	12.166	14.893	12.131	11.855
12.166	10.269	12.166	13.515	12.201	14.893	12.166	11.867
12.201	10.281	12.201	13.528	12.246	14.907	12.201	11.879
12.246	10.281	12.246	13.559	12.286	14.906	12.246	11.891
12.286	10.27	12.286	13.572	12.396	14.906	12.286	11.891
12.396	10.246	12.396	13.578	12.446	14.919	12.396	11.891
12.446	10.199	12.446	13.592	12.486	14.938	12.446	11.891
12.486	10.164	12.486	13.603	12.541	14.951	12.486	11.891
12.541	10.142	12.541	13.616	12.596	14.958	12.541	11.891
12.596	10.129	12.596	13.615	12.686	14.964	12.596	11.891
12.686	10.117	12.686	13.629	12.731	14.977	12.686	11.897
12.731	10.111	12.731	13.654	12.757	14.996	12.731	11.903
12.757	10.111	12.757	13.653	12.817	15.014	12.757	11.91
12.817	10.111	12.817	13.666	12.892	15.034	12.817	11.921
12.892	10.111	12.892	13.666	12.947	15.058	12.892	11.928
12.947	10.123	12.947	13.666	12.982	15.096	12.947	11.934
12.982	10.129	12.982	13.655	13.022	15.109	12.982	11.947
13.022	10.164	13.022	13.642	13.067	15.122	13.022	11.952
13.067	10.177	13.067	13.641	13.127	15.121	13.067	11.965
13.127	10.175	13.127	13.641	13.202	15.128	13.127	11.977
13.202	10.175	13.202	13.641	13.262	15.147	13.202	11.989
13.262	10.164	13.262	13.666	13.307	15.159	13.262	12.001
13.307	10.164	13.307	13.666	13.312	15.185	13.307	12.013
13.312	10.164	13.312	13.666	13.418	15.192	13.312	12.013
13.418	10.129	13.418	13.679	13.468	15.211	13.418	12.027
13.468	10.018	13.468	13.692	13.488	15.224	13.468	12.051
13.488	9.889	13.488	13.705	13.528	15.222	13.488	12.068
13.528	9.76	13.528	13.73	13.563	15.248	13.528	12.093
13.563	9.632	13.563	13.729	13.608	15.248	13.563	12.106
13.608	9.538	13.608	13.729	13.678	15.248	13.608	12.118
13.678	9.52	13.678	13.743	13.723	15.261	13.678	12.117
13.723	9.52	13.723	13.755	13.758	15.273	13.723	12.099
13.758	9.52	13.758	13.767	13.798	15.273	13.758	12.05
13.798	9.52	13.798	13.774	13.843	15.287	13.798	12.026
13.843	9.532	13.843	13.774	13.913	15.299	13.843	12.014
13.913	9.545	13.913	13.761	13.988	15.298	13.913	12.013
13.988	9.568	13.988	13.737	14.048	15.325	13.988	12.026
14.048	9.59	14.048	13.73	14.083	15.337	14.048	12.033
14.083	9.626	14.083	13.729	14.133	15.349	14.083	12.051
14.133	9.643	14.133	13.729	14.213	15.363	14.133	12.062
14.213	9.66	14.213	13.736	14.259	15.375	14.213	12.062
14.259	9.667	14.259	13.75	14.299	15.374	14.259	12.069
14.299	9.667	14.299	13.775	14.319	15.388	14.299	12.075
14.319	9.661	14.319	13.787	14.379	15.4	14.319	12.074
14.379	9.638	14.379	13.807	14.429	15.426	14.379	12.081
14.429	9.567	14.429	13.831	14.484	15.451	14.429	12.093
14.484	9.521	14.484	13.844	14.519	15.476	14.484	12.119
14.519	9.485	14.519	13.869	14.574	15.489	14.519	12.166
14.574	9.474	14.574	13.882	14.664	15.501	14.574	12.185
14.664	9.451	14.664	13.895	14.709	15.501	14.664	12.198
14.709	9.439	14.709	13.907	14.739	15.507	14.709	12.197
14.739	9.416	14.739	13.921	14.779	15.52	14.739	12.197
14.779	9.368	14.779	13.926	14.824	15.546	14.779	12.197
14.824	9.357	14.824	13.933	14.889	15.565	14.824	12.197
14.889	9.334	14.889	13.926	14.97	15.583	14.889	12.197
14.97	9.327	14.97	13.913	15.03	15.596	14.97	12.197
15.03	9.326	15.03	13.901	15.07	15.61	15.03	12.197
15.07	9.326	15.07	13.863	15.11	15.628	15.07	12.197
15.11	9.339	15.11	13.856	15.17	15.627	15.11	12.197
15.17	9.345	15.17	13.869	15.275	15.627	15.17	12.197
15.275	9.344	15.275	13.895	15.32	15.627	15.275	12.197
15.32	9.356	15.32	13.907	15.36	15.641	15.32	12.197
15.36	9.368	15.36	13.92	15.405	15.653	15.36	12.192
15.405	9.38	15.405	13.933	15.485	15.672	15.405	12.191
15.485	9.391	15.485	13.945	15.53	15.704	15.485	12.204
15.53	9.404	15.53	13.957	15.555	15.703	15.53	12.216
15.555	9.403	15.555	13.97	15.6	15.716	15.555	12.235
15.6	9.403	15.6	13.97	15.65	15.723	15.6	12.247
15.65	9.403	15.65	13.97	15.715	15.73	15.65	12.246
15.715	9.392	15.715	13.996	15.786	15.743	15.715	12.246
15.786	9.368	15.786	14.009	15.831	15.754	15.786	12.259
15.831	9.315	15.831	14.022	15.896	15.767	15.831	12.258
15.896	9.28	15.896	14.034	15.936	15.78	15.896	12.258
15.936	9.245	15.936	14.046	15.971	15.805	15.936	12.258
15.971	9.234	15.971	14.046	16.041	15.83	15.971	12.258
16.041	9.221	16.041	14.059	16.096	15.856	16.041	12.266
16.096	9.216	16.096	14.071	16.131	15.881	16.096	12.271
16.131	9.215	16.131	14.085	16.171	15.88	16.131	12.271
16.171	9.187	16.171	14.097	16.246	15.88	16.171	12.271
16.246	9.14	16.246	14.11	16.301	15.88	16.246	12.254
16.301	9.076	16.301	14.109	16.341	15.88	16.301	12.223
16.341	9.005	16.341	14.109	16.397	15.88	16.341	12.222
16.397	8.946	16.397	14.109	16.437	15.893	16.397	12.222
16.437	8.882	16.437	14.109	16.472	15.907	16.437	12.235
16.472	8.876	16.472	14.109	16.532	15.919	16.472	12.246
16.532	8.87	16.532	14.109	16.577	15.932	16.532	12.259
16.577	8.858	16.577	14.109	16.612	15.957	16.577	12.258
16.612	8.835	16.612	14.109	16.652	15.971	16.612	12.272
16.652	8.812	16.652	14.109	16.717	15.983	16.652	12.302
16.717	8.753	16.717	14.109	16.772	16.008	16.717	12.326
16.772	8.7	16.772	14.109	16.822	16.02	16.772	12.351
16.822	8.654	16.822	14.109	16.842	16.02	16.822	12.364
16.842	8.572	16.842	14.109	16.892	16.02	16.842	12.363
16.892	8.56	16.892	14.109	16.932	16.008	16.892	12.345
16.932	8.531	16.932	14.109	17.002	16.007	16.932	12.332
17.002	8.46	17.002	14.109	17.067	16.007	17.002	12.32
17.067	8.425	17.067	14.122	17.117	16.007	17.067	12.332
17.117	8.39	17.117	14.134	17.142	16.021	17.117	12.345
17.142	8.355	17.142	14.148	17.182	16.02	17.142	12.363
17.182	8.338	17.182	14.147	17.262	16.001	17.182	12.388
17.262	8.302	17.262	14.147	17.308	15.964	17.262	12.412
17.308	8.279	17.308	14.134	17.353	15.914	17.308	12.424
17.353	8.238	17.353	14.134	17.383	15.85	17.353	12.436
17.383	8.209	17.383	14.147	17.438	15.792	17.383	12.436
17.438	8.186	17.438	14.16	17.498	15.741	17.438	12.436
17.498	8.163	17.498	14.186	17.538	15.741	17.498	12.436
17.538	8.138	17.538	14.199	17.578	15.749	17.538	12.449
17.578	8.109	17.578	14.212	17.618	15.754	17.578	12.467
17.618	8.069	17.618	14.236	17.663	15.754	17.618	12.467
17.663	8.034	17.663	14.261	17.708	15.754	17.663	12.467
17.708	7.998	17.708	14.274	17.738	15.748	17.708	12.455
17.738	7.952	17.738	14.287	17.778	15.748	17.738	12.442
17.778	7.94	17.778	14.311	17.833	15.754	17.778	12.442
17.833	7.939	17.833	14.337	17.934	15.767	17.833	12.449
17.934	7.939	17.934	14.35	17.984	15.781	17.934	12.462
17.984	7.939	17.984	14.362	18.014	15.799	17.984	12.474
18.014	7.928	18.014	14.362	18.064	15.805	18.014	12.498
18.064	7.916	18.064	14.362	18.109	15.779	18.064	12.492
18.109	7.893	18.109	14.362	18.149	15.754	18.109	12.491
18.149	7.869	18.149	14.362	18.189	15.703	18.149	12.491
18.189	7.857	18.189	14.362	18.229	15.692	18.189	12.504
18.229	7.835	18.229	14.362	18.274	15.679	18.229	12.517
18.274	7.822	18.274	14.362	18.319	15.653	18.274	12.542
18.319	7.835	18.319	14.375	18.409	15.635	18.319	12.553
18.409	7.846	18.409	14.389	18.449	15.622	18.409	12.565
18.449	7.845	18.449	14.413	18.484	15.591	18.449	12.565
18.484	7.858	18.484	14.438	18.509	15.577	18.484	12.565
18.509	7.869	18.509	14.476	18.569	15.521	18.509	12.565
18.569	7.869	18.569	14.476	18.604	15.49	18.569	12.578
18.604	7.869	18.604	14.471	18.724	15.482	18.604	12.577
18.724	7.88	18.724	14.483	18.744	15.482	18.724	12.59
18.744	7.88	18.744	14.508	18.774	15.482	18.744	12.615
18.774	7.869	18.774	14.546	18.835	15.501	18.774	12.614
18.835	7.869	18.835	14.579	18.92	15.501	18.835	12.627
18.92	7.881	18.92	14.59	18.955	15.515	18.92	12.626
18.955	7.887	18.955	14.622	19.005	15.513	18.955	12.626
19.005	7.892	19.005	14.635	19.045	15.513	19.005	12.626
19.045	7.887	19.045	14.648	19.09	15.513	19.045	12.638
19.09	7.875	19.09	14.66	19.165	15.501	19.09	12.651
19.165	7.881	19.165	14.672	19.185	15.501	19.165	12.664
19.185	7.887	19.185	14.679	19.235	15.501	19.185	12.675
19.235	7.916	19.235	14.678	19.28	15.501	19.235	12.689
19.28	7.915	19.28	14.678	19.315	15.489	19.28	12.687
19.315	7.893	19.315	14.678	19.35	15.477	19.315	12.701
19.35	7.881	19.35	14.678	19.41	15.452	19.35	12.713
19.41	7.893	19.41	14.678	19.451	15.438	19.41	12.724
19.451	7.892	19.451	14.678	19.496	15.438	19.451	12.737
19.496	7.881	19.496	14.678	19.546	15.426	19.496	12.75
19.546	7.845	19.546	14.678	19.616	15.388	19.546	12.749
19.616	7.811	19.616	14.678	19.676	15.337	19.616	12.738
19.676	7.788	19.676	14.667	19.736	15.223	19.676	12.724
19.736	7.764	19.736	14.641	19.776	15.166	19.736	12.724
19.776	7.763	19.776	14.629	19.816	15.128	19.776	12.712
19.816	7.763	19.816	14.615	19.856	15.109	19.816	12.712
19.856	7.775	19.856	14.615	19.911	15.097	19.856	12.712
19.911	7.787	19.911	14.615	19.956	15.11	19.911	12.676
19.956	7.793	19.956	14.615	20.016	15.116	19.956	12.664
20.016	7.781	20.016	14.615	20.071	15.129	20.016	12.651
20.071	7.747	20.071	14.615	20.156	15.135	20.071	12.639
20.156	7.676	20.156	14.615	20.176	15.134	20.156	12.621
20.176	7.647	20.176	14.615	20.221	15.122	20.176	12.609
20.221	7.612	20.221	14.615	20.256	15.129	20.221	12.596
20.256	7.589	20.256	14.615	20.306	15.148	20.256	12.571
20.306	7.541	20.306	14.615	20.357	15.159	20.306	12.565
20.357	7.541	20.357	14.615	20.412	15.172	20.357	12.565
20.412	7.548	20.412	14.61	20.452	15.172	20.412	12.565
20.452	7.559	20.452	14.596	20.487	15.148	20.452	12.578
20.487	7.571	20.487	14.584	20.527	15.134	20.487	12.591
20.527	7.582	20.527	14.559	20.607	15.115	20.527	12.602
20.607	7.588	20.607	14.553	20.652	15.091	20.607	12.59
20.652	7.588	20.652	14.552	20.687	15.053	20.652	12.56
20.687	7.588	20.687	14.565	20.737	15.021	20.687	12.535
20.737	7.588	20.737	14.571	20.772	14.99	20.737	12.51
20.772	7.588	20.772	14.539	20.807	14.957	20.772	12.523
20.807	7.6	20.807	14.477	20.847	14.925	20.807	12.522
20.847	7.623	20.847	14.382	20.917	14.894	20.847	12.529
20.917	7.646	20.917	14.268	20.937	14.85	20.917	12.547
20.937	7.658	20.937	14.085	20.988	14.774	20.937	12.546
20.988	7.67	20.988	14.022	21.043	14.723	20.988	12.553
21.043	7.658	21.043	13.939	21.083	14.648	21.043	12.559
21.083	7.635	21.083	13.799	21.118	14.571	21.083	12.566
21.118	7.623	21.118	13.717	21.163	14.419	21.118	12.559
21.163	7.623	21.163	13.597	21.223	14.369	21.163	12.536
21.223	7.623	21.223	13.483	21.263	14.35	21.223	12.437
21.263	7.636	21.263	13.344	21.308	14.349	21.263	12.29
21.308	7.634	21.308	13.217	21.348	14.363	21.308	11.971
21.348	7.576	21.348	13.06	21.408	14.362	21.348	11.762
21.408	7.489	21.408	13.034	21.438	14.349	21.408	11.505
21.438	7.372	21.438	13.022	21.503	14.312	21.438	11.407
21.503	7.254	21.503	13.009	21.533	14.274	21.503	11.339
21.533	7.138	21.533	12.965	21.578	14.223	21.533	11.266
21.578	7.055	21.578	12.864	21.623	14.123	21.578	11.12
21.623	7.014	21.623	12.629	21.658	14.066	21.623	11.033
21.658	7.002	21.658	12.477	21.678	14.002	21.658	10.971
21.678	7.009	21.678	12.339	21.748	13.925	21.678	10.948
21.748	6.997	21.748	12.244	21.793	13.813	21.748	10.923
21.793	6.973	21.793	12.078	21.833	13.616	21.793	10.911
21.833	6.962	21.833	11.99	21.869	13.49	21.833	10.886
21.869	6.945	21.869	11.882	21.944	13.236	21.869	10.849
21.944	6.932	21.944	11.738	21.979	12.952	21.944	10.825
21.979	6.921	21.979	11.516	22.019	12.643	21.979	10.776
22.019	6.897	22.019	11.092	22.089	12.085	22.019	10.763
22.089	6.875	22.089	10.871	22.104	11.94	22.089	10.763
22.104	6.85	22.104	10.68	22.154	11.857	22.104	10.739
22.154	6.839	22.154	10.553	22.219	11.787	22.154	10.703
22.219	6.815	22.219	10.396	22.254	11.718	22.219	10.666
22.254	6.804	22.254	10.269	22.284	11.662	22.254	10.617
22.284	6.775	22.284	10.15	22.329	11.591	22.284	10.58
22.329	6.728	22.329	9.934	22.394	11.548	22.329	10.531
22.394	6.668	22.394	9.801	22.434	11.446	22.394	10.432
22.434	6.576	22.434	9.681	22.475	11.357	22.434	10.273
22.475	6.459	22.475	9.593	22.51	11.218	22.475	10.065
22.51	6.354	22.51	9.44	22.54	10.876	22.51	9.686
22.54	6.259	22.54	9.428	22.585	10.542	22.54	9.507
22.585	6.177	22.585	9.427	22.635	10.143	22.585	9.372
22.635	6.137	22.635	9.415	22.7	9.751	22.635	9.262
22.7	6.113	22.7	9.402	22.74	9.333	22.7	9.059
22.74	6.072	22.74	9.358	22.785	8.776	22.74	8.968
22.785	6.037	22.785	9.308	22.84	8.631	22.785	8.833
22.84	5.949	22.84	9.251	22.895	8.454	22.84	8.74
22.895	5.762	22.895	9.182	22.94	8.264	22.895	8.661
22.94	5.539	22.94	9.105	22.99	7.96	22.94	8.6
22.99	5.282	22.99	9.016	23.03	7.726	22.99	8.49
23.03	4.807	23.03	8.877	23.12	7.473	23.03	8.452
23.12	4.643	23.12	8.782	23.15	7.15	23.12	8.398
23.15	4.403	23.15	8.554	23.2	7.011	23.15	8.337
23.2	4.275	23.2	8.124	23.26	6.929	23.2	8.213
23.26	4.163	23.26	7.89	23.285	6.884	23.26	8.165
23.285	4.041	23.285	7.663	23.31	6.821	23.285	8.122
23.31	3.771	23.31	7.574	23.356	6.771	23.31	7.999
23.356	3.495	23.356	7.473	23.391	6.733	23.356	7.828
23.391	2.945	23.391	7.39	23.456	6.689	23.391	7.552
23.456	2.694	23.456	7.277	23.481	6.593	23.456	7.221
23.481	2.518	23.481	7.213	23.551	6.505	23.481	6.583
23.551	2.448	23.551	7.163	23.596	6.378	23.551	6.338
23.596	2.424	23.596	7.132	23.636	6.233	23.596	6.209
23.636	2.413	23.636	7.099	23.686	6.062	23.636	6.161
23.686	2.389	23.686	7.106	23.721	5.822	23.686	6.087
23.721	2.336	23.721	7.105	23.766	5.746	23.721	6.039
23.766	2.313	23.766	7.118	23.811	5.696	23.766	5.945
23.811	2.29	23.811	7.131	23.871	5.632	23.811	5.823
23.871	2.272	23.871	7.107	23.916	5.606	23.871	5.591
23.916	2.237	23.916	7.068	23.961	5.606	23.916	5.505
23.961	2.226	23.961	6.941	23.992	5.606	23.961	5.45
23.992	2.208	23.992	6.67	24.022	5.619	23.992	5.426
24.022	2.179	24.022	6.107	24.057	5.65	24.022	5.388
24.057	2.12	24.057	5.436	24.097	5.695	24.057	5.352
24.097	2.085	24.097	4.069	24.147	5.714	24.097	5.327
24.147	2.055	24.147	3.562	24.232	5.713	24.147	5.283
24.232	2.055	24.232	3.316	24.277	5.695	24.232	5.223
24.277	2.067	24.277	3.266	24.322	5.676	24.277	5.088
24.322	2.09	24.322	3.265	24.357	5.657	24.322	4.972
24.357	2.114	24.357	3.271	24.407	5.644	24.357	4.825
24.407	2.125	24.407	3.29	24.457	5.632	24.407	4.603
24.457	2.119	24.457	3.29	24.482	5.62	24.457	4.505
24.482	2.108	24.482	3.303	24.522	5.606	24.482	4.433
24.522	2.085	24.522	3.335	24.587	5.581	24.522	4.384
24.587	2.056	24.587	3.36	24.627	5.556	24.587	4.31
24.627	2.032	24.627	3.385	24.662	5.517	24.627	4.297
24.662	2.009	24.662	3.398	24.692	5.492	24.662	4.291
24.692	1.985	24.692	3.41	24.737	5.448	24.692	4.297
24.737	1.973	24.737	3.417	24.772	5.385	24.737	4.31
24.772	1.967	24.772	3.417	24.842	5.302	24.772	4.309
24.842	1.974	24.842	3.417	24.862	5.214	24.842	4.309
24.862	1.973	24.862	3.424	24.938	5.126	24.862	4.304
24.938	1.985	24.938	3.429	24.978	5.019	24.938	4.303
24.978	2.008	24.978	3.429	25.023	4.973	24.978	4.316
25.023	2.027	25.023	3.429	25.043	4.929	25.023	4.315
25.043	2.049	25.043	3.423	25.118	4.86	25.043	4.304
25.118	2.044	25.118	3.418	25.173	4.772	25.118	4.26
25.173	2.026	25.173	3.392	25.193	4.682	25.173	4.156
25.193	1.997	25.193	3.367	25.258	4.62	25.193	4.089
25.258	1.974	25.258	3.341	25.303	4.575	25.258	4.028
25.303	1.962	25.303	3.31	25.368	4.569	25.303	3.985
25.368	1.961	25.368	3.259	25.438	4.568	25.368	3.942
25.438	1.967	25.438	3.233	25.468	4.557	25.438	3.941
25.468	1.967	25.468	3.208	25.519	4.55	25.468	3.941
25.519	1.967	25.519	3.184	25.569	4.537	25.519	3.941
25.569	1.955	25.569	3.177	25.634	4.492	25.569	3.93
25.634	1.91	25.634	3.189	25.684	4.492	25.634	3.905
25.684	1.851	25.684	3.189	25.759	4.487	25.684	3.868
25.759	1.792	25.759	3.189	25.809	4.486	25.759	3.856
25.809	1.687	25.809	3.189	25.849	4.48	25.809	3.869
25.849	1.676	25.849	3.177	25.894	4.456	25.849	3.867
25.894	1.669	25.894	3.133	25.939	4.43	25.894	3.844
25.939	1.646	25.939	3.057	25.974	4.399	25.939	3.825
25.974	1.623	25.974	3.006	26.024	4.328	25.974	3.8
26.024	1.564	26.024	2.955	26.054	4.278	26.024	3.74
26.054	1.534	26.054	2.904	26.119	4.201	26.054	3.739
26.119	1.511	26.119	2.873	26.179	4.12	26.119	3.739
26.179	1.51	26.179	2.835	26.229	4.044	26.179	3.751
26.229	1.522	26.229	2.785	26.269	3.961	26.229	3.765
26.269	1.522	26.269	2.733	26.314	3.961	26.269	3.777
26.314	1.522	26.314	2.67	26.354	3.967	26.314	3.788
26.354	1.511	26.354	2.652	26.384	3.948	26.354	3.795
26.384	1.487	26.384	2.627	26.44	3.924	26.384	3.776
26.44	1.476	26.44	2.601	26.485	3.873	26.44	3.751
26.485	1.464	26.485	2.55	26.53	3.841	26.485	3.727
26.53	1.441	26.53	2.518	26.575	3.816	26.53	3.702
26.575	1.44	26.575	2.494	26.64	3.79	26.575	3.702
26.64	1.44	26.64	2.456	26.675	3.758	26.64	3.716
26.675	1.453	26.675	2.418	26.715	3.727	26.675	3.739
26.715	1.465	26.715	2.355	26.765	3.702	26.715	3.739
26.765	1.487	26.765	2.348	26.81	3.676	26.765	3.739
26.81	1.487	26.81	2.367	26.835	3.671	26.81	3.733
26.835	1.476	26.835	2.366	26.87	3.67	26.835	3.733
26.87	1.44	26.87	2.366	26.91	3.67	26.87	3.733
26.91	1.429	26.91	2.354	26.94	3.658	26.91	3.733
26.94	1.428	26.94	2.354	26.985	3.646	26.94	3.722
26.985	1.428	26.985	2.38	27.046	3.633	26.985	3.685
27.046	1.418	27.046	2.417	27.111	3.632	27.046	3.598
27.111	1.406	27.111	2.404	27.146	3.625	27.111	3.549
27.146	1.382	27.146	2.367	27.206	3.613	27.146	3.506
27.206	1.359	27.206	2.329	27.296	3.589	27.206	3.476
27.296	1.324	27.296	2.29	27.336	3.544	27.296	3.433
27.336	1.3	27.336	2.254	27.401	3.493	27.336	3.347
27.401	1.288	27.401	2.234	27.441	3.418	27.401	3.286
27.441	1.265	27.441	2.203	27.481	3.379	27.441	3.181
27.481	1.265	27.481	2.177	27.536	3.348	27.481	3.115
27.536	1.277	27.536	2.165	27.576	3.323	27.536	3.059
27.576	1.301	27.576	2.158	27.631	3.291	27.576	3.022
27.631	1.313	27.631	2.152	27.676	3.303	27.631	2.942
27.676	1.324	27.676	2.151	27.716	3.315	27.676	2.918
27.716	1.33	27.716	2.12	27.781	3.329	27.716	2.906
27.781	1.342	27.781	2.07	27.831	3.354	27.781	2.894
27.831	1.352	27.831	2.006	27.866	3.379	27.831	2.881
27.866	1.352	27.866	1.956	27.886	3.393	27.866	2.858
27.886	1.352	27.886	1.887	27.962	3.418	27.886	2.82
27.962	1.346	27.962	1.885	28.017	3.417	27.962	2.783
28.017	1.346	28.017	1.899	28.057	3.43	28.017	2.74
28.057	1.358	28.057	1.912	28.122	3.45	28.057	2.661
28.122	1.371	28.122	1.925	28.162	3.436	28.122	2.636
28.162	1.382	28.162	1.937	28.197	3.418	28.162	2.581
28.197	1.382	28.197	1.962	28.257	3.38	28.197	2.539
28.257	1.376	28.257	1.936	28.312	3.31	28.257	2.513
28.312	1.359	28.312	1.911	28.352	3.297	28.312	2.476
28.352	1.348	28.352	1.861	28.392	3.291	28.352	2.476
28.392	1.335	28.392	1.836	28.437	3.29	28.392	2.476
28.437	1.33	28.437	1.835	28.507	3.29	28.437	2.489
28.507	1.324	28.507	1.823	28.558	3.29	28.507	2.488
28.558	1.336	28.558	1.811	28.608	3.29	28.558	2.477
28.608	1.347	28.608	1.798	28.633	3.271	28.608	2.465
28.633	1.346	28.633	1.785	28.678	3.247	28.633	2.44
28.678	1.346	28.678	1.772	28.723	3.208	28.678	2.416
28.723	1.335	28.723	1.772	28.773	3.17	28.723	2.385
28.773	1.335	28.773	1.759	28.838	3.145	28.773	2.342
28.838	1.348	28.838	1.735	28.888	3.138	28.838	2.305
28.888	1.359	28.888	1.684	28.908	3.151	28.888	2.232
28.908	1.37	28.908	1.659	28.958	3.17	28.908	2.201
28.958	1.37	28.958	1.634	29.023	3.183	28.958	2.14
29.023	1.347	29.023	1.607	29.058	3.195	29.023	2.024
29.058	1.336	29.058	1.607	29.118	3.208	29.058	1.95
29.118	1.323	29.118	1.607	29.148	3.208	29.118	1.858
29.148	1.323	29.148	1.62	29.203	3.203	29.148	1.809
29.203	1.312	29.203	1.634	29.248	3.19	29.203	1.741
29.248	1.3	29.248	1.633	29.293	3.127	29.248	1.68
29.293	1.289	29.293	1.62	29.333	3.1	29.293	1.57
29.333	1.276	29.333	1.607	29.373	3.089	29.333	1.539
29.373	1.277	29.373	1.607	29.408	3.088	29.373	1.533
29.408	1.283	29.408	1.621	29.479	3.088	29.408	1.532
29.479	1.272	29.479	1.62	29.529	3.1	29.479	1.532
29.529	1.248	29.529	1.62	29.574	3.088	29.529	1.532
29.574	1.213	29.574	1.589	29.619	3.075	29.574	1.545
29.619	1.125	29.619	1.563	29.649	3.069	29.619	1.545
29.649	1.089	29.649	1.552	29.689	3.069	29.649	1.534
29.689	1.066	29.689	1.538	29.759	3.056	29.689	1.496
29.759	1.054	29.759	1.519	29.794	3.044	29.759	1.46
29.794	1.032	29.794	1.518	29.839	3.012	29.794	1.411
29.839	1.042	29.839	1.518	29.879	3	29.839	1.337
29.879	1.042	29.879	1.513	29.904	2.987
29.904	1.042			29.939	2.986
29.939	1.042			29.974	2.975
29.974	1.032			30.04	2.961
30.04	1.03			30.135	2.936
30.135	1.03			30.175	2.925
30.175	1.03			30.225	2.912
30.225	1.03			30.27	2.898
30.27	1.03			30.325	2.848
30.325	1.03			30.36	2.798
30.36	1.03			30.4	2.747
30.4	1.03			30.46	2.658
30.46	1.03			30.475	2.62
30.475	1.03			30.51	2.594
30.51	1.043			30.55	2.569
30.55	1.054			30.62	2.544
30.62	1.066			30.665	2.532
30.665	1.077			30.7	2.531
30.7	1.09			30.75	2.531
30.75	1.089			30.775	2.531
30.775	1.089			30.83	2.531
30.83	1.089			30.88	2.52
30.88	1.078			30.905	2.506
30.905	1.067			30.946	2.481
30.946	1.055			30.986	2.48
30.986	1.043			31.051	2.494
31.051	1.042			31.086	2.493
31.086	1.055			31.141	2.493
31.141	1.066			31.191	2.493
31.191	1.077			31.231	2.481
31.231	1.067			31.276	2.48
31.276	1.055			31.316	2.48
31.316	1.031			31.361	2.437
31.361	1.03			31.416	2.341
31.416	1.03			31.506	2.265
31.506	1.03			31.546	2.176
31.546	1.03			31.587	2.12
31.587	1.03			31.637	2.038
31.637	1.037			31.672	2.032
31.672	1.055			31.722	2.044
31.722	1.066			31.742	2.057
31.742	1.078			31.822	2.07
31.822	1.078			31.857	2.082
31.857	1.066			31.897	2.088
31.897	1.048			31.962	2.088
31.962	1.025			32.007	2.101
32.007	1.013			32.042	2.113
32.042	1.013			32.072	2.113
32.072	1.019			32.137	2.113
32.137	1.032			32.222	2.113
32.222	1.043			32.242	2.102
32.242	1.054			32.272	2.082
32.272	1.061			32.312	2.063
32.312	1.06			32.352	2.05
32.352	1.054			32.407	2.026
32.407	1.054			32.457	2.007
32.457	1.06			32.503	1.962
32.503	1.049			32.563	1.937
32.563	1.008			32.628	1.924
32.628	0.996			32.673	1.898
32.673	0.995			32.718	1.86
32.718	1.007			32.763	1.836
32.763	1.02			32.783	1.824
32.783	1.043			32.828	1.797
32.828	1.049			32.873	1.785
32.873	1.048			32.933	1.791
32.933	1.048			32.983	1.804
32.983	1.048			33.018	1.803
33.018	1.043			33.053	1.829
33.053	1.042			33.104	1.822
33.104	1.042			33.149	1.809
33.149	1.042			33.189	1.809
33.189	1.025			33.229	1.822
33.229	1.013			33.274	1.836
33.274	1.002			33.339	1.835
33.339	0.979			33.384	1.848
33.384	0.984			33.424	1.861
33.424	0.996			33.474	1.886
33.474	1.02			33.509	1.899
33.509	1.031			33.574	1.906
33.574	1.03			33.624	1.918
33.624	1.03			33.684	1.93
33.684	1.03			33.724	1.956
33.724	1.03			33.754	1.963
33.754	1.03			33.849	1.961
33.849	1.037			33.899	1.956
33.899	1.042			33.934	1.937
33.934	1.048			33.969	1.899
33.969	1.048			34.015	1.823
34.015	1.043			34.07	1.791
34.07	1.037			34.115	1.772
34.115	1.02			34.165	1.772
34.165	1.007			34.215	1.772
34.215	1.007			34.255	1.772
34.255	1.019			34.3	1.772
34.3	1.031			34.355	1.772
34.355	1.03			34.395	1.772
34.395	1.03			34.435	1.772
34.435	1.03			34.49	1.772
34.49	1.03			34.57	1.785
34.57	1.03			34.626	1.797
34.626	1.043			34.676	1.797
34.676	1.054			34.726	1.81
34.726	1.054			34.776	1.809
34.776	1.054			34.796	1.809
34.796	1.043			34.856	1.824
34.856	1.03			34.906	1.836
34.906	1.03			34.936	1.848
34.936	1.03			34.986	1.847
34.986	1.026			35.081	1.861
35.081	1.002			35.126	1.874
35.126	0.99			35.171	1.873
35.171	0.967			35.206	1.848
35.206	0.95			35.246	1.811
35.246	0.948			35.326	1.785
35.326	0.937			35.376	1.784
35.376	0.937			35.416	1.797
35.416	0.948			35.466	1.824
35.466	0.972			35.502	1.836
35.502	0.985			35.537	1.842
35.537	0.983			35.577	1.854
35.577	0.996			35.647	1.866
35.647	0.995			35.662	1.866
35.662	0.985			35.692	1.874
35.692	0.996			35.752	1.873
35.752	1.008			35.797	1.861
35.797	1.007			35.832	1.86
35.832	1.031			35.887	1.842
35.887	1.025			35.947	1.817
35.947	1.007			35.987	1.803
35.987	0.984			36.067	1.778
36.067	0.961			36.102	1.772
36.102	0.908			36.153	1.772
36.153	0.902			36.188	1.772
36.188	0.896			36.238	1.772
36.238	0.879			36.268	1.766
36.268	0.878			36.318	1.765
36.318	0.867			36.363	1.765
36.363	0.862			36.403	1.765
36.403	0.855			36.443	1.765
36.443	0.855			36.488	1.772
36.488	0.855			36.543	1.772
36.543	0.867			36.578	1.759
36.578	0.878			36.618	1.722
36.618	0.878			36.693	1.709
36.693	0.867			36.738	1.697
36.738	0.827			36.768	1.696
36.768	0.825			36.833	1.696
36.833	0.825			36.863	1.708
36.863	0.838			36.908	1.708
36.908	0.849			36.958	1.708
36.958	0.856			36.988	1.696
36.988	0.85
37.029	0.849
37.069	0.849
37.129	0.849
37.169	0.855
37.209	0.855
37.249	0.855
37.269	0.85
37.349	0.849
37.389	0.849
37.429	0.849
37.489	0.855
37.519	0.855
37.549	0.855
37.599	0.855
37.65	0.855
37.68	0.855
37.73	0.855
37.785	0.855
37.845	0.855
37.88	0.855
37.92	0.855
37.96	0.855
38.045	0.855
38.09	0.855
38.115	0.855
38.17	0.867
38.215	0.866
38.26	0.866
38.31	0.866
38.335	0.855
38.385	0.855
38.43	0.855
38.475	0.855
38.515	0.855
38.581	0.855
38.621	0.855
38.651	0.866
38.696	0.878
38.771	0.878
38.821	0.878
38.851	0.878
38.891	0.868
38.931	0.855
39.016	0.867
39.051	0.879
39.091	0.89
39.111	0.914
39.207	0.913
39.242	0.913
39.292	0.913
39.337	0.913
39.377	0.913
39.412	0.913
39.447	0.913
39.482	0.902
39.512	0.89
39.572	0.873
39.652	0.85
39.667	0.826
39.712	0.815
39.787	0.814
39.822	0.82
39.882	0.826
39.922	0.809
39.972	0.755
40.017	0.72
40.063	0.691
40.123	0.692
40.188	0.703
40.223	0.714
40.268	0.732
40.313	0.721
40.358	0.716
40.383	0.714
40.433	0.714
40.493	0.732
40.533	0.738
40.573	0.738
40.598	0.738
40.648	0.738
40.674	0.738
40.719	0.738
40.804	0.738
40.869	0.738
40.914	0.727
40.954	0.716
40.999	0.714
41.039	0.714
41.084	0.714
41.124	0.738
41.174	0.738
41.219	0.738
41.254	0.738
41.279	0.738
41.319	0.738
41.354	0.727
41.414	0.715
41.494	0.714
41.519	0.714
41.555	0.727
41.6	0.739
41.645	0.738
41.725	0.738
41.775	0.738
41.825	0.738
41.875	0.738
41.925	0.738
42.005	0.738
42.04	0.738
42.085	0.738
42.115	0.738
42.15	0.738
42.21	0.738
42.276	0.738
42.311	0.738
42.376	0.738
42.416	0.738
42.456	0.738
42.511	0.738
42.556	0.738
42.596	0.738
42.636	0.738
42.701	0.738
42.746	0.738
42.796	0.738
42.841	0.75
42.881	0.762
42.916	0.773
42.941	0.773
42.986	0.75
43.031	0.739
43.066	0.738
43.102	0.738
43.167	0.738
43.207	0.738
43.257	0.738
43.312	0.738
43.382	0.738
43.417	0.738
43.457	0.744
43.507	0.75
43.552	0.755
43.617	0.755
43.682	0.762
43.713	0.755
43.763	0.749
43.798	0.749
43.873	0.738
43.898	0.738
43.948	0.738
44.008	0.738
44.023	0.738
44.073	0.738
44.133	0.738
44.178	0.738
44.213	0.738
44.258	0.738
44.328	0.738
44.373	0.738
44.418	0.738
44.463	0.738
44.498	0.738
44.578	0.738
44.619	0.738
44.669	0.738
44.714	0.738
44.759	0.738
44.804	0.738
44.854	0.738
44.894	0.738
44.929	0.738
44.969	0.738
45.054	0.738
45.089	0.738
45.134	0.738
45.179	0.738
45.199	0.738
45.24	0.738
45.29	0.726
45.355	0.726
45.395	0.726
45.445	0.726
45.47	0.726
45.54	0.715
45.58	0.691
45.63	0.691
45.67	0.703
45.735	0.702
45.77	0.715
45.795	0.727
45.835	0.726
45.9	0.738
45.94	0.738
45.98	0.727
46.045	0.715
46.08	0.714
46.12	0.704
46.171	0.691
46.236	0.691
46.271	0.692
46.296	0.691
46.346	0.691
46.386	0.691
46.426	0.679
46.481	0.679
46.536	0.679
46.571	0.679
46.646	0.686
46.686	0.697
46.726	0.709
46.762	0.732
46.797	0.738
46.862	0.738
46.902	0.738
46.942	0.738
47.007	0.738
47.052	0.738
47.102	0.726
47.132	0.715
47.187	0.704
47.227	0.692
47.262	0.679
47.292	0.691
47.342	0.703
47.367	0.727
47.402	0.739
47.452	0.732
47.527	0.732
47.572	0.732
47.602	0.732
47.653	0.739
47.708	0.738
47.743	0.738
47.793	0.738
47.843	0.738
47.868	0.738
47.898	0.738
47.973	0.738
48.018	0.733
48.063	0.714
48.103	0.714
48.128	0.708
48.173	0.715
48.218	0.721
48.294	0.732
48.334	0.739
48.364	0.727
48.434	0.726
48.484	0.714
48.534	0.692
48.589	0.703
48.634	0.702
48.669	0.702
48.709	0.702
48.739	0.692
48.794	0.68
48.864	0.679
48.904	0.686
48.964	0.685
49.004	0.685
49.029	0.685
49.064	0.68
49.119	0.692
49.175	0.704
49.225	0.726
49.285	0.738
49.305	0.738
49.345	0.727
49.395	0.715
49.435	0.691
49.475	0.68
49.525	0.691
49.57	0.703
49.595	0.714
49.645	0.727
49.695	0.726
49.735	0.721
49.786	0.709
49.826	0.698
49.881	0.686
49.916	0.68
49.961	0.679
50.021	0.679
50.071	0.667
50.116	0.667
50.161	0.667
50.206	0.656
50.231	0.656
50.271	0.656
50.316	0.656
50.376	0.656
50.391	0.679
50.441	0.679
50.496	0.679
50.536	0.679
50.586	0.679
50.636	0.679
50.662	0.679
50.702	0.679
50.737	0.679
50.807	0.679
50.857	0.679
50.917	0.679
50.947	0.679
50.987	0.679
51.042	0.679
51.082	0.679
51.157	0.679
51.187	0.679
51.242	0.679
51.298	0.679
51.343	0.679
51.428	0.679
51.468	0.674
51.498	0.656
51.548	0.656
51.598	0.656
51.638	0.662
51.663	0.668
51.698	0.679
51.733	0.679
51.798	0.679
51.878	0.679
51.898	0.679
51.928	0.679
51.988	0.679
52.048	0.679
52.118	0.679
52.158	0.679
52.219	0.679
52.239	0.679
52.279	0.679
52.309	0.679
52.389	0.679
52.434	0.679
52.479	0.679
52.529	0.679
52.569	0.679
52.614	0.679
52.679	0.679
52.724	0.679
52.764	0.679
52.81	0.679
52.83	0.679
52.875	0.679
52.905	0.679
52.95	0.679
53.03	0.679
53.07	0.673
53.115	0.662
53.15	0.639
53.18	0.627
53.23	0.633
53.275	0.65
53.31	0.656
53.35	0.661
53.405	0.651
53.45	0.645
53.495	0.639
53.555	0.632
53.595	0.645
53.635	0.656
53.711	0.669
53.746	0.679
53.781	0.679
53.821	0.679
53.886	0.679
53.916	0.679
53.961	0.679
54.001	0.679
54.046	0.679
54.096	0.669
54.181	0.644
54.201	0.632
54.266	0.621
54.301	0.62
54.332	0.62
54.402	0.62
54.477	0.62
54.517	0.62
54.577	0.62
54.612	0.62
54.652	0.62
54.722	0.62
54.767	0.62
54.792	0.62
54.822	0.62
54.872	0.62
54.927	0.62
54.977	0.62
55.022	0.61
55.082	0.603
55.157	0.603
55.212	0.591
55.248	0.591
55.283	0.591
55.318	0.575
55.383	0.574
55.433	0.562
55.478	0.562
55.523	0.562
55.553	0.557
55.618	0.546
55.663	0.544
55.703	0.533
55.758	0.516
55.798	0.515
55.864	0.503
55.909	0.503
55.944	0.503
55.984	0.503
56.044	0.503
56.084	0.503
56.124	0.503
56.149	0.503

## Sheet: Fig. 2n
x-axis-P-PLA	y-axis-Stress (MPa)	Y-axis error	x-axis-MRSD-PLA2	y-axis-Stress (MPa)	Y-axis error	x-axis-MRSD-PLA4	y-axis-Stress (MPa)	Y-axis error	x-axis-MRSD-PLA6	y-axis-Stress (MPa)	Y-axis error
0	11.1	1.1	2	14.5	1.2	4	16	1.1	6	12.8	1
