# Supplementary material for: Hierarchically heterogeneous interface structuring strategy for microenvironment-regulating and self-decontaminating biodegradable meta-membranes
Source: Research Square preprint supplement (doi:10.21203/rs.3.rs-7509740/v1), 2026-01-06
Supplement: Supplementary file 4 [file 65012ca8a2d3acacff7da34c.xlsx]

## Sheet: Fig. 3a
y-axis	x-axis-WCA (°)	x-axis error
P-PLA	112.6	2.2
MRSD-PLA2	119.1	3.5
MRSD-PLA4	125.1	2.4
MRSD-PLA6	137.4	3.6

## Sheet: Fig. 3g
x-axis	y-axis-WVTR (g·m-2·d-1)	y-axis error
Mask	3697.9	23.3
PP	3731.8	23.1
P-PLA	3875.9	22.5
Cotton	3997.2	23.2
MRSD-PLA6	4018	23.2

## Sheet: Fig. 3i
x-axis	y-axis-Air Permeability (mm·s-1)	y-axis error
P-PLA	46.8	0.5
MRSD-PLA2	74.9	0.4
MRSD-PLA4	69.5	0.3
MRSD-PLA6	68.9	0.3
