# Supplementary material for: Hierarchically heterogeneous interface structuring strategy for microenvironment-regulating and self-decontaminating biodegradable meta-membranes
Source: Research Square preprint supplement (doi:10.21203/rs.3.rs-7509740/v1), 2026-01-06
Supplement: Supplementary file 6 [file 824ed919ebab3f56aae64c8d.xlsx]

## Sheet: Fig. 5a
x-axis-Airflow Capacity (L/min)	y-axis-Filtration Efficiency (%)	y-axis-error	y-axis-Filtration Efficiency (%)	y-axis-error	y-axis-Filtration Efficiency (%)	y-axis-error	y-axis-Filtration Efficiency (%)	y-axis-error
	P-PLA		MRSD-PLA2		MRSD-PLA4		MRSD-PLA6
10	98.3	1.32	99.1	0.92	99.64	1.54	99.12	1.32
32	89.53	1.1	98.4	0.88	97.08	1.21	95.14	1.21
65	75.67	1.23	93.84	0.94	89.19	1.17	87.92	1.32
85	71.3	1.16	90.96	0.89	85.13	0.97	84.64	1.14

## Sheet: Fig. 5b
x-axis	y-axis-Pressure Drop 10 L/min	y-axis-Pressure Drop 85 L/min
P-PLA	142.8	419.2
MRSD-PLA2	59.1	163.7
MRSD-PLA4	82.4	234
MRSD-PLA6	99.3	280

## Sheet: Fig. 5c
x-axis	y-axis-Quality Factor (Pa-1))	y-axis-error	y-axis-Quality Factor (Pa-1))	y-axis-error
P-PLA	0.0157	0.002	0.0029	0.0002
MRSD-PLA2	0.0699	0.001	0.0147	0.0001
MRSD-PLA4	0.043	0.0015	0.0081	0.0003
MRSD-PLA6	0.0302	0.0012	0.0067	0.0001

## Sheet: Fig. 5d
x-axis-Airflow Capacity (L/min)	y-axis-Filtration Efficiency (%)	y-axis-error	y-axis-Filtration Efficiency (%)	y-axis-error
	P-PLA		MRSD-PLA6
10	90.76	0.32	97.52	0.33
32	91.58	0.34	95.85	0.32
65	90.77	0.3	97.04	0.28
85	88.24	0.29	96.15	0.27

## Sheet: Fig. 5e
x-axis-Airflow Capacity (L/min)	y-axis-Filtration Efficiency (%)	y-axis-error	y-axis-Filtration Efficiency (%)	y-axis-error
	P-PLA		MRSD-PLA6
10	94.12	1.22	98.57	1.25
32	86.37	1.13	96.94	1.11
65	74.66	1.25	92.89	1.31
85	65.37	0.99	89.06	1.21

## Sheet: Fig. 5f
x-axis-Time (min)	y-axis-Filtration Efficiency (%)	y-axis-error
10	97.32	0.21
20	97.29	0.18
30	97.7	0.22
40	97.88	0.19
50	98.14	0.19
60	98.06	0.18

## Sheet: Fig. 5g
x-axis-Time (min)	y-axis-Pressure Drop	y-axis-error	y-axis-Pressure Drop	y-axis-error
0	98.4	2.2	89.53	1.9
10	93.2	1.8	76.37	1.7
x-axis-Time (min)	y-axis-Pressure Drop	y-axis-error	y-axis-Pressure Drop	y-axis-error
0	263.7	0.3	59.1	0.2
10	632.4	0.3	222.5	0.3

## Sheet: Fig. 5h
x-axis-Pore Size (μm)	y-axis-Percentage (%)	x-axis-Pore Size (μm)	y-axis-Percentage (%)	x-axis-Pore Size (μm)	y-axis-Percentage (%)	x-axis-Pore Size (μm)	y-axis-Percentage (%)
9.6913	0.008	6.4873	0.004	6.7409	0.005	7.27	0.008
8.7301	0.015	6.1907	0	6.7289	0	6.4299	0
8.3016	0.527	5.7974	0.001	6.0991	0.001	5.9175	0.116
7.6056	0	5.3669	0.072	5.956	0.058	5.6039	0.375
7.32	0.293	5.2042	0.025	5.5785	0.294	5.4472	2.855
6.9323	0.451	4.9304	0.09	5.4596	0.039	4.9336	2.572
6.5421	0.187	4.731	0.054	5.4277	0.119	4.8487	2.931
6.1812	0.831	4.5374	0.546	5.38	0.073	4.7232	1.442
5.8997	0.591	4.3836	0.823	5.2418	0.115	4.642	2.531
5.8337	0.224	4.1537	1.525	5.1375	0.208	4.5262	46.722
5.73	0.524	4.1024	0.99	4.923	0.664	4.3663	1.253
5.4451	1.165	3.985	1.517	4.5697	1.184	4.3273	2.623
5.167	1.171	3.897	2.631	4.3553	3.034	4.3063	1.001
4.9968	1.114	3.8273	1.544	4.212	2.367
4.8884	1.528	3.7864	5.945	4.0727	3.11
4.7801	2.449	3.7556	7.35	3.9698	6.999
4.6938	3.388	3.6854	39.077	3.9292	5.413
4.6674	7.81	3.6832	12.172	3.8699	0.761
4.6287	30.734	3.6103	2.144	3.8537	5.893
4.5027	1.663			3.8436	31.271
				3.7783	20.952
				3.7048	8.646
				3.6077	0.9
				3.5154	1.118
				3.4309	0.877
				3.3645	2.626
				3.3025	1.112
				3.2491	1.268
				3.1546	0.892

## Sheet: Fig. 5i
x-axis	y-axis-Porosity (%)	y-axis-error
P-PLA	77.7	2.3
MRSD-PLA2	88.7	1.2
MRSD-PLA4	84	1.3
MRSD-PLA6	83	1.5
