# Supplementary material for: Hierarchically heterogeneous interface structuring strategy for microenvironment-regulating and self-decontaminating biodegradable meta-membranes
Source: Research Square preprint supplement (doi:10.21203/rs.3.rs-7509740/v1), 2026-01-06
Supplement: Supplementary file 7 [file f3d30966d4dfddde037621f5.xlsx]

## Sheet: Fig. S2g
x-axis-Frequency (Hz)	y-axis-Surface Potential (kV)	y-axis error
Day 0	4.2	0.4
Day 30	3.9	0.2

## Sheet: Fig. S2h
x-axis-Frequency (Hz)	y-axis-Relative Dielectric Constant
100	1.4497
102.33	1.4227
104.71	1.4282
107.15	1.4268
109.65	1.4253
112.2	1.4119
114.82	1.4169
117.49	1.4146
120.23	1.4195
123.03	1.4054
125.89	1.4
128.82	1.4117
131.83	1.4108
134.9	1.4157
138.04	1.4139
141.25	1.4157
144.54	1.4165
147.91	1.4031
151.36	1.4002
154.88	1.4091
158.49	1.4123
162.18	1.4183
165.96	1.4127
169.82	1.41
173.78	1.4117
177.83	1.4143
181.97	1.4104
186.21	1.3984
190.55	1.3982
194.98	1.3958
199.53	1.3906
204.17	1.3982
208.93	1.3957
213.8	1.3907
218.78	1.394
223.87	1.399
229.09	1.4086
234.42	1.4086
239.88	1.3841
245.47	1.3866
251.19	1.3856
257.04	1.3921
263.03	1.4022
269.15	1.4033
275.42	1.3972
281.84	1.3885
288.4	1.3909
295.12	1.3927
302	1.3993
309.03	1.3992
316.23	1.3977
323.59	1.3904
331.13	1.3893
338.84	1.3834
346.74	1.3964
354.81	1.3916
363.08	1.398
371.54	1.3974
380.19	1.3932
389.05	1.3995
398.11	1.3985
407.38	1.399
416.87	1.3901
426.58	1.4
436.52	1.3973
446.68	1.3925
457.09	1.4068
467.74	1.3977
478.63	1.3991
489.78	1.3963
501.19	1.3991
512.86	1.4006
524.81	1.405
537.03	1.4035
549.54	1.4076
562.34	1.4046
575.44	1.3994
588.84	1.3921
602.56	1.3988
616.6	1.4089
630.96	1.4063
645.65	1.4054
660.69	1.3958
676.08	1.3956
691.83	1.4036
707.95	1.385
724.44	1.3941
741.31	1.4035
758.58	1.4087
776.25	1.3963
794.33	1.3962
812.83	1.3919
831.76	1.3881
851.14	1.4037
870.96	1.3977
891.25	1.3899
912.01	1.396
933.25	1.404
954.99	1.3768
977.24	1.3907
1000	1.3872
1023.29	1.3758
1047.13	1.3818
1071.52	1.3905
1096.48	1.4012
1122.02	1.401
1148.15	1.4005
1174.9	1.3855
1202.26	1.4052
1230.27	1.3914
1258.93	1.3953
1288.25	1.3865
1318.26	1.3875
1348.96	1.3922
1380.38	1.3972
1412.54	1.3928
1445.44	1.3893
1479.11	1.3874
1513.56	1.3907
1548.82	1.3943
1584.89	1.3916
1621.81	1.3915
1659.59	1.3925
1698.24	1.3907
1737.8	1.3916
1778.28	1.3909
1819.7	1.3932
1862.09	1.3894
1905.46	1.3921
1949.84	1.388
1995.26	1.3903
2041.74	1.3931
2089.3	1.3897
2137.96	1.3929
2187.76	1.3902
2238.72	1.3919
2290.87	1.3885
2344.23	1.3899
2398.83	1.3913
2454.71	1.3905
2511.89	1.3878
2570.4	1.3891
2630.27	1.3893
2691.53	1.3895
2754.23	1.3908
2818.38	1.3903
2884.03	1.3868
2951.21	1.3915
3019.95	1.3885
3090.3	1.391
3162.28	1.3914
3235.94	1.3888
3311.31	1.3892
3388.44	1.3862
3467.37	1.3875
3548.13	1.39
3630.78	1.3875
3715.35	1.3886
3801.89	1.389
3890.45	1.3901
3981.07	1.3911
4073.8	1.3926
4168.69	1.3911
4265.8	1.388
4365.16	1.3898
4466.84	1.3899
4570.88	1.3878
4677.35	1.3893
4786.3	1.3879
4897.79	1.3881
5011.87	1.3882
5128.61	1.3888
5248.07	1.3868
5370.32	1.3865
5495.41	1.388
5623.41	1.3867
5754.4	1.389
5888.44	1.3905
6025.6	1.3866
6165.95	1.3877
6309.57	1.3879
6456.54	1.3876
6606.93	1.3894
6760.83	1.3862
6918.31	1.3865
7079.46	1.3889
7244.36	1.389
7413.1	1.3856
7585.78	1.3872
7762.47	1.3873
7943.28	1.3896
8128.31	1.3865
8317.64	1.3874
8511.38	1.3866
8709.64	1.3866
8912.51	1.3862
9120.11	1.3862
9332.54	1.3857
9549.93	1.3876
9772.37	1.3856
10000	1.387
10232.9	1.387
10471.3	1.3856
10715.2	1.3846
10964.8	1.3866
11220.2	1.3867
11481.5	1.3866
11749	1.3845
12022.6	1.3867
12302.7	1.3857
12589.2	1.3855
12882.5	1.3859
13182.6	1.3854
13489.6	1.3843
13803.8	1.3849
14125.4	1.3853
14454.4	1.3862
14791.1	1.3864
15135.6	1.385
15488.2	1.3847
15848.9	1.3846
16218.1	1.3847
16595.9	1.3864
16982.4	1.3837
17378	1.3824
17782.8	1.3872
18197	1.3825
18620.9	1.3819
19054.6	1.3875
19498.5	1.3804
19952.6	1.3864
20417.4	1.3818
20893	1.3808
21379.6	1.3793
21877.6	1.3834
22387.2	1.3841
22908.7	1.3828
23442.3	1.3818
23988.3	1.3827
24547.1	1.383
25118.9	1.3822
25704	1.3817
26302.7	1.3816
26915.3	1.3822
27542.3	1.3827
28183.8	1.383
28840.3	1.3822
29512.1	1.382
30199.5	1.3813
30903	1.3816
31622.8	1.3814
32359.4	1.3816
33113.1	1.3802
33884.4	1.3803
34673.7	1.3805
35481.3	1.3804
36307.8	1.3802
37153.5	1.3802
38018.9	1.3787
38904.5	1.3789
39810.7	1.3784
40738	1.3804
41686.9	1.3792
42657.9	1.3782
43651.6	1.3777
44668.4	1.3778
45708.8	1.3778
46773.5	1.3778
47863	1.3774
48977.9	1.3762
50118.7	1.3765
51286.1	1.3779
52480.8	1.3775
53703.2	1.3795
54954.1	1.3782
56234.1	1.3747
57544	1.3858
58884.4	1.3904
60256	1.3695
61659.5	1.3945
63095.7	1.3764
64565.4	1.3803
66069.3	1.3837
67608.3	1.3879
69183.1	1.3795
70794.6	1.3791
72443.6	1.3787
74131	1.3749
75857.8	1.3707
77624.7	1.3737
79432.8	1.3725
81283.1	1.373
83176.4	1.3911
85113.8	1.3921
87096.4	1.3811
89125.1	1.3867
91201.1	1.3886
93325.4	1.3687
95499.3	1.3717
97723.7	1.3701
100000	1.3689
102329	1.3696
104713	1.3694
107152	1.3723
109648	1.369
112202	1.3701
114815	1.3687
117490	1.3686
120226	1.3695
123027	1.3661
125893	1.3676
128825	1.3661
131826	1.3674
134896	1.3663
138038	1.3659
141254	1.3675
144544	1.3659
147911	1.3659
151356	1.3661
154882	1.3663
158489	1.3649
162181	1.3639
165959	1.3661
169824	1.3664
173780	1.3676
177828	1.3662
181970	1.3664
186209	1.3658
190546	1.3676
194984	1.3683
199526	1.3684
204174	1.3704
208930	1.3712
213796	1.3704
218776	1.3713
223872	1.3708
229087	1.3729
234423	1.3759
239883	1.3761
245471	1.3797
251189	1.3783
257040	1.3823
263027	1.3793
269153	1.3828
275423	1.3825
281838	1.3818
288403	1.3826
295121	1.3816
301995	1.3857
309030	1.3833
316228	1.383
323594	1.3836
331131	1.3823
338844	1.383
346737	1.382
354813	1.3795
363078	1.3821
371535	1.3785
380189	1.3792
389045	1.3774
398107	1.3752
407380	1.3748
416869	1.3751
426580	1.3719
436516	1.3705
446684	1.3681
457088	1.3686
467735	1.3664
478630	1.3612
489779	1.366
501187	1.3663
512861	1.3562
524807	1.3539
537032	1.3524
549541	1.349
562341	1.3473
575440	1.3442
588844	1.3408
602560	1.3392
616595	1.335
630957	1.3346
645654	1.3297
660693	1.3291
676083	1.3271
691831	1.3213
707946	1.322
724436	1.3186
741310	1.3191
758578	1.3207
776247	1.3222
794328	1.3279
812831	1.3357
831764	1.3485
851138	1.3634
870964	1.3826
891251	1.4045
912011	1.4289
933254	1.454
954993	1.4795
977237	1.4992
1000000	1.5171

## Sheet: Fig. S2i
x-axis	y-axis-WVTR (g·m-2·d-1)
1st	3981
2nd	3983
3rd	3984

## Sheet: Fig. S2j
x-axis-Airflow Capacity (L/min)	y1-axis-Filtration Efficiency (%)	y1-axis error	y2-axis-Pressure Drop (Pa)
10	98.73	1.04	135.6
32	96.28	1.34	181.3
65	91.51	1.11	248.3
85	83.65	1.21	323.5

## Sheet: Fig. S3
x-axis-Diameter (nm)	y-axis-Relative Frequency (%)	Fitting Curve			x-axis-Diameter (nm)	y-axis-Relative Frequency (%)	Fitting Curve			x-axis-Diameter (nm)	y-axis-Relative Frequency (%)	Fitting Curve			x-axis-Diameter (nm)	y-axis-Relative Frequency (%)	Fitting Curve			x-axis-Diameter (nm)	y-axis-Relative Frequency (%)	Fitting Curve			x-axis-Diameter (nm)	y-axis-Relative Frequency (%)	Fitting Curve
27.5	6.06061	27.5	17.3985		85	6.25	85	6.90964		150	7.69231	150	12.1206		350	5	350	10.3979		250	7.5	250	7.11846		250	7.5	250	7.11846
32.5	9.09091	27.5801	17.3985		95	15.625	85.0801	6.95922		250	20.5128	152.402	12.1206		450	35	350.701	10.4572		350	20	250.601	7.12954		350	20	250.601	7.12954
37.5	39.3939	27.6001	17.3985		105	25	85.1602	7.00914		350	17.9487	153.003	12.1206		550	17.5	351.401	10.5175		450	40	251.201	7.14091		450	40	251.201	7.14091
42.5	27.2727	27.6201	17.3985		115	21.875	85.2402	7.0594		450	15.3846	153.604	12.1206		650	17.5	352.102	10.579		550	12.5	251.802	7.15258		550	12.5	251.802	7.15258
47.5	18.1818	27.6401	17.3985		125	18.75	85.3203	7.10999		550	23.0769	154.204	12.1206		750	17.5	352.803	10.6417		650	7.5	252.402	7.16456		650	7.5	252.402	7.16456
		27.6602	17.3985		135	3.125	85.4004	7.16092		650	12.8205	154.805	12.1206		850	5	353.503	10.7055		750	7.5	253.003	7.17685		750	7.5	253.003	7.17685
		27.6802	17.3985		145	6.25	85.4805	7.21219		750	2.5641	155.405	12.1206		950	0	354.204	10.7705		850	5	253.604	7.18946		850	5	253.604	7.18946
		27.7002	17.3985		155	0	85.5606	7.26379				156.006	12.1206				354.905	10.8367				254.204	7.2024				254.204	7.2024
		27.7202	17.3985		165	3.125	85.6406	7.31573				156.607	12.1206				355.606	10.9041				254.805	7.21568				254.805	7.21568
		27.7402	17.3985				85.7207	7.36801				157.207	12.1206				356.306	10.9727				255.405	7.22929				255.405	7.22929
		27.7603	17.3985				85.8008	7.42062				157.808	12.1206				357.007	11.0426				256.006	7.24325				256.006	7.24325
		27.7803	17.3985				85.8809	7.47357				158.408	12.1206				357.708	11.1136				256.607	7.25757				256.607	7.25757
		27.8003	17.3985				85.961	7.52685				159.009	12.1206				358.408	11.1859				257.207	7.27225				257.207	7.27225
		27.8203	17.3985				86.041	7.58048				159.61	12.1206				359.109	11.2594				257.808	7.2873				257.808	7.2873
		27.8403	17.3985				86.1211	7.63443				160.21	12.1206				359.81	11.3342				258.408	7.30273				258.408	7.30273
		27.8604	17.3985				86.2012	7.68873				160.811	12.1206				360.511	11.4102				259.009	7.31855				259.009	7.31855
		27.8804	17.3985				86.2813	7.74335				161.411	12.1206				361.211	11.4875				259.61	7.33476				259.61	7.33476
		27.9004	17.3985				86.3614	7.79832				162.012	12.1206				361.912	11.5661				260.21	7.35138				260.21	7.35138
		27.9204	17.3985				86.4414	7.85361				162.613	12.1206				362.613	11.646				260.811	7.3684				260.811	7.3684
		27.9404	17.3985				86.5215	7.90925				163.213	12.1206				363.313	11.7271				261.411	7.38584				261.411	7.38584
		27.9605	17.3985				86.6016	7.96521				163.814	12.1206				364.014	11.8096				262.012	7.40371				262.012	7.40371
		27.9805	17.3985				86.6817	8.02151				164.414	12.1206				364.715	11.8933				262.613	7.42202				262.613	7.42202
		28.0005	17.3985				86.7618	8.07814				165.015	12.1206				365.415	11.9784				263.213	7.44077				263.213	7.44077
		28.0205	17.3985				86.8418	8.13511				165.616	12.1206				366.116	12.0648				263.814	7.45997				263.814	7.45997
		28.0405	17.3985				86.9219	8.1924				166.216	12.1206				366.817	12.1525				264.414	7.47964				264.414	7.47964
		28.0606	17.3985				87.002	8.25003				166.817	12.1206				367.518	12.2415				265.015	7.49977				265.015	7.49977
		28.0806	17.3985				87.0821	8.30799				167.417	12.1206				368.218	12.3319				265.616	7.52039				265.616	7.52039
		28.1006	17.3985				87.1622	8.36628				168.018	12.1206				368.919	12.4236				266.216	7.54149				266.216	7.54149
		28.1206	17.3985				87.2422	8.4249				168.619	12.1206				369.62	12.5166				266.817	7.5631				266.817	7.5631
		28.1406	17.3985				87.3223	8.48384				169.219	12.1206				370.32	12.6109				267.417	7.5852				267.417	7.5852
		28.1607	17.3985				87.4024	8.54311				169.82	12.1206				371.021	12.7066				268.018	7.60783				268.018	7.60783
		28.1807	17.3985				87.4825	8.60271				170.42	12.1206				371.722	12.8037				268.619	7.63098				268.619	7.63098
		28.2007	17.3985				87.5626	8.66264				171.021	12.1206				372.422	12.902				269.219	7.65467				269.219	7.65467
		28.2207	17.3985				87.6426	8.72289				171.622	12.1206				373.123	13.0017				269.82	7.67891				269.82	7.67891
		28.2407	17.3985				87.7227	8.78347				172.222	12.1206				373.824	13.1028				270.42	7.7037				270.42	7.7037
		28.2608	17.3985				87.8028	8.84436				172.823	12.1206				374.525	13.2052				271.021	7.72906				271.021	7.72906
		28.2808	17.3985				87.8829	8.90558				173.423	12.1206				375.225	13.3089				271.622	7.75499				271.622	7.75499
		28.3008	17.3985				87.963	8.96713				174.024	12.1206				375.926	13.414				272.222	7.78151				272.222	7.78151
		28.3208	17.3985				88.043	9.02899				174.625	12.1206				376.627	13.5204				272.823	7.80862				272.823	7.80862
		28.3408	17.3985				88.1231	9.09117				175.225	12.1206				377.327	13.6282				273.423	7.83634				273.423	7.83634
		28.3609	17.3985				88.2032	9.15366				175.826	12.1206				378.028	13.7372				274.024	7.86468				274.024	7.86468
		28.3809	17.3985				88.2833	9.21648				176.426	12.1206				378.729	13.8476				274.625	7.89364				274.625	7.89364
		28.4009	17.3985				88.3634	9.2796				177.027	12.1206				379.429	13.9593				275.225	7.92325				275.225	7.92325
		28.4209	17.3985				88.4434	9.34305				177.628	12.1206				380.13	14.0724				275.826	7.9535				275.826	7.9535
		28.4409	17.3985				88.5235	9.4068				178.228	12.1206				380.831	14.1867				276.426	7.98441				276.426	7.98441
		28.461	17.3985				88.6036	9.47087				178.829	12.1206				381.532	14.3023				277.027	8.016				277.027	8.016
		28.481	17.3985				88.6837	9.53524				179.429	12.1206				382.232	14.4192				277.628	8.04826				277.628	8.04826
		28.501	17.3985				88.7638	9.59992				180.03	12.1206				382.933	14.5374				278.228	8.08122				278.228	8.08122
		28.521	17.3985				88.8438	9.66491				180.631	12.1206				383.634	14.6569				278.829	8.11488				278.829	8.11488
		28.541	17.3985				88.9239	9.73021				181.231	12.1206				384.334	14.7777				279.429	8.14925				279.429	8.14925
		28.5611	17.3985				89.004	9.7958				181.832	12.1206				385.035	14.8997				280.03	8.18436				280.03	8.18436
		28.5811	17.3985				89.0841	9.8617				182.432	12.1206				385.736	15.0229				280.631	8.2202				280.631	8.2202
		28.6011	17.3985				89.1642	9.9279				183.033	12.1206				386.436	15.1474				281.231	8.25679				281.231	8.25679
		28.6211	17.3985				89.2442	9.9944				183.634	12.1206				387.137	15.2731				281.832	8.29414				281.832	8.29414
		28.6411	17.3985				89.3243	10.0612				184.234	12.1206				387.838	15.4001				282.432	8.33226				282.432	8.33226
		28.6612	17.3985				89.4044	10.1283				184.835	12.1206				388.539	15.5282				283.033	8.37117				283.033	8.37117
		28.6812	17.3985				89.4845	10.1957				185.435	12.1206				389.239	15.6575				283.634	8.41087				283.634	8.41087
		28.7012	17.3985				89.5646	10.2633				186.036	12.1206				389.94	15.7879				284.234	8.45138				284.234	8.45138
		28.7212	17.3985				89.6446	10.3313				186.637	12.1206				390.641	15.9195				284.835	8.4927				284.835	8.4927
		28.7412	17.3985				89.7247	10.3995				187.237	12.1206				391.341	16.0522				285.435	8.53486				285.435	8.53486
		28.7613	17.3985				89.8048	10.4681				187.838	12.1206				392.042	16.1861				286.036	8.57786				286.036	8.57786
		28.7813	17.3985				89.8849	10.5369				188.438	12.1206				392.743	16.321				286.637	8.62172				286.637	8.62172
		28.8013	17.3985				89.965	10.606				189.039	12.1206				393.443	16.457				287.237	8.66644				287.237	8.66644
		28.8213	17.3985				90.0451	10.6754				189.64	12.1206				394.144	16.5941				287.838	8.71205				287.838	8.71205
		28.8413	17.3985				90.1251	10.745				190.24	12.1206				394.845	16.7322				288.438	8.75854				288.438	8.75854
		28.8614	17.3985				90.2052	10.8149				190.841	12.1206				395.546	16.8714				289.039	8.80593				289.039	8.80593
		28.8814	17.3985				90.2853	10.8851				191.441	12.1206				396.246	17.0115				289.64	8.85424				289.64	8.85424
		28.9014	17.3985				90.3654	10.9556				192.042	12.1206				396.947	17.1526				290.24	8.90348				290.24	8.90348
		28.9214	17.3985				90.4454	11.0263				192.643	12.1206				397.648	17.2946				290.841	8.95365				290.841	8.95365
		28.9414	17.3985				90.5255	11.0973				193.243	12.1206				398.348	17.4376				291.441	9.00478				291.441	9.00478
		28.9615	17.3985				90.6056	11.1686				193.844	12.1206				399.049	17.5814				292.042	9.05687				292.042	9.05687
		28.9815	17.3985				90.6857	11.2401				194.444	12.1206				399.75	17.7262				292.643	9.10994				292.643	9.10994
		29.0015	17.3985				90.7658	11.3119				195.045	12.1206				400.45	17.8717				293.243	9.16399				293.243	9.16399
		29.0215	17.3985				90.8458	11.3839				195.646	12.1206				401.151	18.0181				293.844	9.21904				293.844	9.21904
		29.0415	17.3985				90.9259	11.4562				196.246	12.1206				401.852	18.1653				294.444	9.2751				294.444	9.2751
		29.0616	17.3985				91.006	11.5287				196.847	12.1206				402.553	18.3132				295.045	9.33219				295.045	9.33219
		29.0816	17.3985				91.0861	11.6015				197.447	12.1206				403.253	18.4619				295.646	9.39031				295.646	9.39031
		29.1016	17.3985				91.1662	11.6745				198.048	12.1206				403.954	18.6112				296.246	9.44948				296.246	9.44948
		29.1216	17.3985				91.2463	11.7477				198.649	12.1206				404.655	18.7613				296.847	9.50971				296.847	9.50971
		29.1416	17.3985				91.3263	11.8212				199.249	12.1206				405.355	18.912				297.447	9.57101				297.447	9.57101
		29.1617	17.3985				91.4064	11.895				199.85	12.1206				406.056	19.0632				298.048	9.6334				298.048	9.6334
		29.1817	17.3985				91.4865	11.9689				200.45	12.1206				406.757	19.2151				298.649	9.69688				298.649	9.69688
		29.2017	17.3985				91.5666	12.0431				201.051	12.1206				407.457	19.3675				299.249	9.76147				299.249	9.76147
		29.2217	17.3985				91.6466	12.1175				201.652	12.1206				408.158	19.5204				299.85	9.82717				299.85	9.82717
		29.2417	17.3985				91.7267	12.1922				202.252	12.1206				408.859	19.6737				300.45	9.89401				300.45	9.89401
		29.2618	17.3985				91.8068	12.267				202.853	12.1206				409.56	19.8275				301.051	9.96199				301.051	9.96199
		29.2818	17.3985				91.8869	12.3421				203.453	12.1206				410.26	19.9817				301.652	10.0311				301.652	10.0311
		29.3018	17.3985				91.967	12.4174				204.054	12.1206				410.961	20.1362				302.252	10.1014				302.252	10.1014
		29.3218	17.3985				92.047	12.4929				204.655	12.1206				411.662	20.2911				302.853	10.1729				302.853	10.1729
		29.3418	17.3985				92.1271	12.5686				205.255	12.1206				412.362	20.4462				303.453	10.2455				303.453	10.2455
		29.3619	17.3985				92.2072	12.6445				205.856	12.1206				413.063	20.6016				304.054	10.3194				304.054	10.3194
		29.3819	17.3985				92.2873	12.7206				206.456	12.1206				413.764	20.7572				304.655	10.3945				304.655	10.3945
		29.4019	17.3985				92.3674	12.7969				207.057	12.1206				414.464	20.9129				305.255	10.4708				305.255	10.4708
		29.4219	17.3985				92.4475	12.8734				207.658	12.1206				415.165	21.0688				305.856	10.5483				305.856	10.5483
		29.4419	17.3985				92.5275	12.95				208.258	12.1206				415.866	21.2248				306.456	10.627				306.456	10.627
		29.462	17.3985				92.6076	13.0269				208.859	12.1206				416.567	21.3807				307.057	10.707				307.057	10.707
		29.482	17.3985				92.6877	13.1039				209.459	12.1206				417.267	21.5367				307.658	10.7883				307.658	10.7883
		29.502	17.3985				92.7678	13.1812				210.06	12.1206				417.968	21.6927				308.258	10.8709				308.258	10.8709
		29.522	17.3985				92.8478	13.2586				210.661	12.1206				418.669	21.8485				308.859	10.9547				308.859	10.9547
		29.542	17.3985				92.9279	13.3361				211.261	12.1206				419.369	22.0042				309.459	11.0398				309.459	11.0398
		29.5621	17.3985				93.008	13.4139				211.862	12.1206				420.07	22.1598				310.06	11.1262				310.06	11.1262
		29.5821	17.3985				93.0881	13.4917				212.462	12.1206				420.771	22.3151				310.661	11.214				310.661	11.214
		29.6021	17.3985				93.1682	13.5698				213.063	12.1206				421.471	22.4701				311.261	11.303				311.261	11.303
		29.6221	17.3985				93.2482	13.648				213.664	12.1206				422.172	22.6249				311.862	11.3934				311.862	11.3934
		29.6421	17.3985				93.3283	13.7264				214.264	12.1206				422.873	22.7792				312.462	11.4851				312.462	11.4851
		29.6622	17.3985				93.4084	13.8049				214.865	12.1206				423.574	22.9332				313.063	11.5782				313.063	11.5782
		29.6822	17.3985				93.4885	13.8835				215.465	12.1206				424.274	23.0867				313.664	11.6726				313.664	11.6726
		29.7022	17.3985				93.5686	13.9623				216.066	12.1206				424.975	23.2397				314.264	11.7684				314.264	11.7684
		29.7222	17.3985				93.6487	14.0412				216.667	12.1206				425.676	23.3922				314.865	11.8656				314.865	11.8656
		29.7422	17.3985				93.7287	14.1203				217.267	12.1206				426.376	23.5441				315.465	11.9641				315.465	11.9641
		29.7623	17.3985				93.8088	14.1995				217.868	12.1206				427.077	23.6953				316.066	12.064				316.066	12.064
		29.7823	17.3985				93.8889	14.2788				218.468	12.1206				427.778	23.8459				316.667	12.1653				316.667	12.1653
		29.8023	17.3985				93.969	14.3582				219.069	12.1206				428.478	23.9957				317.267	12.2681				317.267	12.2681
		29.8223	17.3985				94.049	14.4377				219.67	12.1206				429.179	24.1447				317.868	12.3722				317.868	12.3722
		29.8423	17.3985				94.1291	14.5173				220.27	12.1206				429.88	24.2929				318.468	12.4777				318.468	12.4777
		29.8624	17.3985				94.2092	14.5971				220.871	12.1206				430.581	24.4402				319.069	12.5847				319.069	12.5847
		29.8824	17.3985				94.2893	14.6769				221.471	12.1206				431.281	24.5866				319.67	12.6931				319.67	12.6931
		29.9024	17.3985				94.3694	14.7569				222.072	12.1206				431.982	24.732				320.27	12.8029				320.27	12.8029
		29.9224	17.3985				94.4494	14.8369				222.673	12.1206				432.683	24.8764				320.871	12.9141				320.871	12.9141
		29.9424	17.3985				94.5295	14.917				223.273	12.1206				433.383	25.0197				321.471	13.0268				321.471	13.0268
		29.9625	17.3985				94.6096	14.9972				223.874	12.1206				434.084	25.1619				322.072	13.141				322.072	13.141
		29.9825	17.3985				94.6897	15.0775				224.474	12.1206				434.785	25.3029				322.673	13.2566				322.673	13.2566
		30.0025	17.3985				94.7698	15.1578				225.075	12.1206				435.485	25.4427				323.273	13.3736				323.273	13.3736
		30.0225	17.3985				94.8499	15.2382				225.676	12.1206				436.186	25.5812				323.874	13.4921				323.874	13.4921
		30.0425	17.3985				94.9299	15.3187				226.276	12.1206				436.887	25.7184				324.474	13.6121				324.474	13.6121
		30.0626	17.3985				95	15.3892				226.877	12.1206				437.588	25.8543				325.075	13.7335				325.075	13.7335
		30.0826	17.3985				95.01	15.3992				227.477	12.1206				438.288	25.9887				325.676	13.8564				325.676	13.8564
		30.1026	17.3985				95.0901	15.4798				228.078	12.1206				438.989	26.1216				326.276	13.9807				326.276	13.9807
		30.1226	17.3985				95.1702	15.5604				228.679	12.1206				439.69	26.2531				326.877	14.1065				326.877	14.1065
		30.1426	17.3985				95.2502	15.6411				229.279	12.1206				440.39	26.383				327.477	14.2338				327.477	14.2338
		30.1627	17.3985				95.3303	15.7218				229.88	12.1206				441.091	26.5113				328.078	14.3626				328.078	14.3626
		30.1827	17.3985				95.4104	15.8026				230.48	12.1206				441.792	26.638				328.679	14.4928				328.679	14.4928
		30.2027	17.3985				95.4905	15.8834				231.081	12.1206				442.492	26.763				329.279	14.6245				329.279	14.6245
		30.2227	17.3985				95.5706	15.9642				231.682	12.1206				443.193	26.8862				329.88	14.7577				329.88	14.7577
		30.2427	17.3985				95.6506	16.045				232.282	12.1206				443.894	27.0077				330.48	14.8924				330.48	14.8924
		30.2628	17.3985				96.0511	16.4492				232.883	12.1206				444.595	27.1273				331.081	15.0285				331.081	15.0285
		30.2828	17.3985				96.1311	16.53				233.483	12.1206				445.295	27.245				331.682	15.166				331.682	15.166
		30.3028	17.3985				96.2112	16.6108				234.084	12.1206				445.996	27.3609				332.282	15.3051				332.282	15.3051
		30.3228	17.3985				96.2913	16.6916				234.685	12.1206				446.697	27.4747				332.883	15.4456				332.883	15.4456
		30.3428	17.3985				96.3714	16.7723				235.285	12.1206				447.397	27.5866				333.483	15.5876				333.483	15.5876
		30.3629	17.3985				96.4514	16.8531				235.886	12.1206				448.098	27.6964				334.084	15.731				334.084	15.731
		30.3829	17.3985				96.5315	16.9337				236.486	12.1206				448.799	27.8042				334.685	15.8758				334.685	15.8758
		30.4029	17.3985				96.6116	17.0144				237.087	12.1206				449.5	27.9098				335.285	16.0221				335.285	16.0221
		30.4229	17.3985				96.6917	17.095				237.688	12.1206				450	27.9839				335.886	16.1699				335.886	16.1699
		30.4429	17.3985				96.7718	17.1755				238.288	12.1206				450.2	28.0132				336.486	16.3191				336.486	16.3191
		30.463	17.3985				96.8518	17.256				238.889	12.1206				450.901	28.1145				337.087	16.4697				337.087	16.4697
		30.483	17.3985				96.9319	17.3364				239.489	12.1206				451.602	28.2135				337.688	16.6217				337.688	16.6217
		30.503	17.3985				97.012	17.4167				240.09	12.1206				452.302	28.3102				338.288	16.7752				338.288	16.7752
		30.523	17.3985				97.0921	17.497				240.691	12.1206				453.003	28.4046				338.889	16.93				338.889	16.93
		30.543	17.3985				97.1722	17.5771				241.291	12.1206				453.704	28.4966				339.489	17.0863				339.489	17.0863
		30.5631	17.3985				97.2523	17.6572				241.892	12.1206				454.404	28.5863				340.09	17.244				340.09	17.244
		30.5831	17.3985				97.3323	17.7372				242.492	12.1206				455.105	28.6735				340.691	17.403				340.691	17.403
		30.6031	17.3985				97.4124	17.8171				243.093	12.1206				455.806	28.7582				341.291	17.5634				341.291	17.5634
		30.6231	17.3985				97.4925	17.8969				243.694	12.1206				456.507	28.8405				341.892	17.7251				341.892	17.7251
		30.6431	17.3985				97.5726	17.9765				244.294	12.1206				457.207	28.9202				342.492	17.8882				342.492	17.8882
		30.6632	17.3985				97.6526	18.0561				244.895	12.1206				457.908	28.9974				343.093	18.0527				343.093	18.0527
		30.6832	17.3985				97.7327	18.1355				245.495	12.1206				458.609	29.072				343.694	18.2185				343.694	18.2185
		30.7032	17.3985				97.8128	18.2148				246.096	12.1206				459.309	29.1439				344.294	18.3855				344.294	18.3855
		30.7232	17.3986				97.8929	18.294				246.697	12.1206				460.01	29.2132				344.895	18.5539				344.895	18.5539
		30.7432	17.3986				97.973	18.373				247.297	12.1206				460.711	29.2799				345.495	18.7236				345.495	18.7236
		30.7633	17.3986				98.053	18.4519				247.898	12.1206				461.411	29.3438				346.096	18.8945				346.096	18.8945
		30.7833	17.3986				98.1331	18.5307				248.499	12.1206				462.112	29.405				346.697	19.0667				346.697	19.0667
		30.8033	17.3986				98.2132	18.6092				249.099	12.1206				462.813	29.4634				347.297	19.2402				347.297	19.2402
		30.8233	17.3986				98.2933	18.6877				249.7	12.1206				463.514	29.5191				347.898	19.4148				347.898	19.4148
		30.8433	17.3986				98.3734	18.7659				250	12.1206				464.214	29.572				348.498	19.5907				348.498	19.5907
		30.8634	17.3986				98.4535	18.844				250.3	12.1206				464.915	29.622				349.099	19.7678				349.099	19.7678
		30.8834	17.3986				98.5335	18.9219				250.901	12.1206				465.616	29.6692				349.7	19.946				349.7	19.946
		30.9034	17.3986				98.6136	18.9996				251.501	12.1206				466.316	29.7136				350	20.0356				350	20.0356
		30.9234	17.3986				98.6937	19.0771				252.102	12.1206				467.017	29.7551				350.3	20.1254				350.3	20.1254
		30.9434	17.3986				98.7738	19.1544				252.703	12.1206				467.718	29.7936				350.901	20.3059				350.901	20.3059
		30.9635	17.3986				98.8538	19.2315				253.303	12.1206				468.418	29.8293				351.502	20.4876				351.502	20.4876
		30.9835	17.3986				98.9339	19.3084				253.904	12.1206				469.119	29.862				352.102	20.6703				352.102	20.6703
		31.0035	17.3986				99.014	19.3851				254.505	12.1206				469.82	29.8919				352.703	20.8542				352.703	20.8542
		31.0235	17.3986				99.0941	19.4616				255.105	12.1206				470.521	29.9187				353.303	21.039				353.303	21.039
		31.0435	17.3986				99.1742	19.5378				255.706	12.1206				471.221	29.9426				353.904	21.2249				353.904	21.2249
		31.0636	17.3986				99.2542	19.6139				256.306	12.1206				471.922	29.9635				354.505	21.4119				354.505	21.4119
		31.0836	17.3986				99.3343	19.6896				256.907	12.1206				472.623	29.9815				355.105	21.5998				355.105	21.5998
		31.1036	17.3986				99.4144	19.7652				257.508	12.1206				473.323	29.9964				355.706	21.7886				355.706	21.7886
		31.1236	17.3986				99.4945	19.8404				258.108	12.1206				474.024	30.0084				356.306	21.9784				356.306	21.9784
		31.1436	17.3986				99.5746	19.9154				258.709	12.1206				474.725	30.0173				356.907	22.1692				356.907	22.1692
		31.1637	17.3986				99.6547	19.9902				259.309	12.1206				475.425	30.0233				357.508	22.3608				357.508	22.3608
		31.1837	17.3986				99.7347	20.0647				259.91	12.1206				476.126	30.0263				358.108	22.5532				358.108	22.5532
		31.2037	17.3986				99.8148	20.1389				260.511	12.1206				476.827	30.0262				358.709	22.7465				358.709	22.7465
		31.2237	17.3986				99.8949	20.2128				261.111	12.1206				477.528	30.0232				359.309	22.9407				359.309	22.9407
		31.2437	17.3986				99.975	20.2865				261.712	12.1206				478.228	30.0171				359.91	23.1356				359.91	23.1356
		31.2638	17.3986				100.055	20.3599				262.312	12.1206				478.929	30.0081				360.511	23.3312				360.511	23.3312
		31.2838	17.3986				100.135	20.4329				262.913	12.1207				479.63	29.996				361.111	23.5276				361.111	23.5276
		31.3038	17.3986				100.215	20.5057				263.514	12.1207				480.33	29.9809				361.712	23.7247				361.712	23.7247
		31.3238	17.3986				100.295	20.5781				264.114	12.1207				481.031	29.9629				362.312	23.9224				362.312	23.9224
		31.3438	17.3987				100.375	20.6503				264.715	12.1207				481.732	29.9419				362.913	24.1208				362.913	24.1208
		31.3639	17.3987				100.455	20.7221				265.315	12.1207				482.432	29.9179				363.514	24.3198				363.514	24.3198
		31.3839	17.3987				100.536	20.7936				265.916	12.1207				483.133	29.891				364.114	24.5193				364.114	24.5193
		31.4039	17.3987				100.616	20.8647				266.517	12.1207				483.834	29.8611				364.715	24.7194				364.715	24.7194
		31.4239	17.3987				100.696	20.9355				267.117	12.1207				484.535	29.8283				365.315	24.92				365.315	24.92
		31.4439	17.3987				100.776	21.006				267.718	12.1207				485.235	29.7925				365.916	25.1211				365.916	25.1211
		31.464	17.3987				100.856	21.0761				268.318	12.1207				485.936	29.7538				366.517	25.3226				366.517	25.3226
		31.484	17.3987				100.936	21.1459				268.919	12.1207				486.637	29.7123				367.117	25.5245				367.117	25.5245
		31.504	17.3988				101.016	21.2153				269.52	12.1207				487.337	29.6678				367.718	25.7268				367.718	25.7268
		31.524	17.3988				101.096	21.2843				270.12	12.1207				488.038	29.6205				368.318	25.9294				368.318	25.9294
		31.544	17.3988				101.176	21.353				270.721	12.1207				488.739	29.5704				368.919	26.1323				368.919	26.1323
		31.5641	17.3988				101.256	21.4213				271.321	12.1207				489.439	29.5174				369.52	26.3355				369.52	26.3355
		31.5841	17.3988				101.336	21.4892				271.922	12.1207				490.14	29.4617				370.12	26.5389				370.12	26.5389
		31.6041	17.3988				101.416	21.5567				272.523	12.1207				490.841	29.4032				370.721	26.7426				370.721	26.7426
		31.6241	17.3989				101.496	21.6238				273.123	12.1207				491.542	29.3419				371.321	26.9463				371.321	26.9463
		31.6441	17.3989				101.577	21.6905				273.724	12.1207				492.242	29.2779				371.922	27.1502				371.922	27.1502
		31.6642	17.3989				101.657	21.7568				274.324	12.1207				492.943	29.2111				372.523	27.3542				372.523	27.3542
		31.6842	17.3989				101.737	21.8227				274.925	12.1207				493.644	29.1418				373.123	27.5582				373.123	27.5582
		31.7042	17.399				101.817	21.8882				275.526	12.1207				494.344	29.0697				373.724	27.7622				373.724	27.7622
		31.7242	17.399				101.897	21.9532				276.126	12.1207				495.045	28.9951				374.324	27.9662				374.324	27.9662
		31.7442	17.399				101.977	22.0178				276.727	12.1207				495.746	28.9178				374.925	28.1701				374.925	28.1701
		31.7643	17.3991				102.057	22.082				277.327	12.1207				496.446	28.838				375.526	28.3739				375.526	28.3739
		31.7843	17.3991				102.137	22.1458				277.928	12.1207				497.147	28.7557				376.126	28.5775				376.126	28.5775
		31.8043	17.3991				102.217	22.2091				278.529	12.1207				497.848	28.6709				376.727	28.7809				376.727	28.7809
		31.8243	17.3992				102.297	22.2719				279.129	12.1207				498.549	28.5836				377.327	28.9841				377.327	28.9841
		31.8443	17.3992				102.377	22.3343				279.73	12.1207				499.249	28.4938				377.928	29.187				377.928	29.187
		31.8644	17.3993				102.457	22.3962				280.33	12.1207				499.95	28.4017				378.529	29.3895				378.529	29.3895
		31.8844	17.3993				102.538	22.4577				280.931	12.1207				500.651	28.3073				379.129	29.5918				379.129	29.5918
		31.9044	17.3994				102.618	22.5187				281.532	12.1207				501.351	28.2105				379.73	29.7936				379.73	29.7936
		31.9244	17.3995				102.698	22.5792				282.132	12.1207				502.052	28.1114				380.33	29.9949				380.33	29.9949
		31.9444	17.3995				102.778	22.6392				282.733	12.1207				502.753	28.0101				380.931	30.1958				380.931	30.1958
		31.9645	17.3996				102.858	22.6987				283.333	12.1207				503.453	27.9066				381.532	30.3961				381.532	30.3961
		31.9845	17.3997				102.938	22.7578				283.934	12.1208				504.154	27.8009				382.132	30.5958				382.132	30.5958
		32.0045	17.3997				103.018	22.8163				284.535	12.1208				504.855	27.6931				382.733	30.795				382.733	30.795
		32.0245	17.3998				103.098	22.8743				285.135	12.1208				505.556	27.5832				383.333	30.9934				383.333	30.9934
		32.0445	17.3999				103.178	22.9319				285.736	12.1208				506.256	27.4713				383.934	31.1912				383.934	31.1912
		32.0646	17.4				103.258	22.9889				286.336	12.1208				506.957	27.3574				384.535	31.3882				384.535	31.3882
		32.0846	17.4001				103.338	23.0454				286.937	12.1208				507.658	27.2415				385.135	31.5844				385.135	31.5844
		32.1046	17.4002				103.418	23.1013				287.538	12.1208				508.358	27.1237				385.736	31.7797				385.736	31.7797
		32.1246	17.4003				103.499	23.1568				288.138	12.1208				509.059	27.004				386.336	31.9742				386.336	31.9742
		32.1446	17.4004				103.579	23.2117				288.739	12.1208				509.76	26.8825				386.937	32.1677				386.937	32.1677
		32.1647	17.4005				103.659	23.266				289.339	12.1208				510.46	26.7592				387.538	32.3603				387.538	32.3603
		32.1847	17.4006				103.739	23.3198				289.94	12.1209				511.161	26.6342				388.138	32.5518				388.138	32.5518
		32.2047	17.4008				103.819	23.3731				290.541	12.1209				511.862	26.5074				388.739	32.7423				388.739	32.7423
		32.2247	17.4009				103.899	23.4258				291.141	12.1209				512.563	26.3791				389.339	32.9317				389.339	32.9317
		32.2447	17.4011				103.979	23.478				291.742	12.1209				513.263	26.2491				389.94	33.1199				389.94	33.1199
		32.2648	17.4012				104.059	23.5296				292.342	12.1209				513.964	26.1176				390.541	33.3069				390.541	33.3069
		32.2848	17.4014				104.139	23.5806				292.943	12.1209				514.665	25.9846				391.141	33.4927				391.141	33.4927
		32.3048	17.4016				104.219	23.631				293.544	12.1209				515.365	25.8501				391.742	33.6772				391.742	33.6772
		32.3248	17.4017				104.299	23.6809				294.144	12.1209				516.066	25.7142				392.342	33.8603				392.342	33.8603
		32.3448	17.4019				104.379	23.7302				294.745	12.121				516.767	25.577				392.943	34.0421				392.943	34.0421
		32.3649	17.4021				104.459	23.7789				295.345	12.121				517.467	25.4384				393.544	34.2225				393.544	34.2225
		32.3849	17.4024				104.54	23.827				295.946	12.121				518.168	25.2986				394.144	34.4014				394.144	34.4014
		32.4049	17.4026				104.62	23.8745				296.547	12.121				518.869	25.1575				394.745	34.5788				394.745	34.5788
		32.4249	17.4029				104.7	23.9214				297.147	12.121				519.57	25.0153				395.345	34.7546				395.345	34.7546
		32.4449	17.4031				104.78	23.9677				297.748	12.1211				520.27	24.872				395.946	34.9289				395.946	34.9289
		32.465	17.4034				104.86	24.0135				298.348	12.1211				520.971	24.7276				396.547	35.1015				396.547	35.1015
		32.485	17.4037				104.94	24.0586				298.949	12.1211				521.672	24.5821				397.147	35.2724				397.147	35.2724
		32.5	17.4039				105	24.092				299.55	12.1211				522.372	24.4357				397.748	35.4416				397.748	35.4416
		32.505	17.404				105.02	24.103				300.15	12.1212				523.073	24.2884				398.348	35.6091				398.348	35.6091
		32.525	17.4043				105.1	24.1469				300.751	12.1212				523.774	24.1402				398.949	35.7747				398.949	35.7747
		32.5451	17.4047				105.18	24.1901				301.351	12.1212				524.474	23.9911				399.55	35.9384				399.55	35.9384
		32.5651	17.4051				105.26	24.2327				301.952	12.1212				525.175	23.8413				400.15	36.1003				400.15	36.1003
		32.5851	17.4054				105.34	24.2747				302.553	12.1213				525.876	23.6907				400.751	36.2602				400.751	36.2602
		32.6051	17.4059				105.42	24.316				303.153	12.1213				526.577	23.5394				401.351	36.4182				401.351	36.4182
		32.6251	17.4063				105.501	24.3567				303.754	12.1213				527.277	23.3876				401.952	36.5742				401.952	36.5742
		32.6452	17.4067				105.581	24.3968				304.354	12.1214				527.978	23.2351				402.553	36.728				402.553	36.728
		32.6652	17.4072				105.661	24.4361				304.955	12.1214				528.679	23.082				403.153	36.8798				403.153	36.8798
		32.6852	17.4077				105.741	24.4749				305.556	12.1215				529.379	22.9285				403.754	37.0294				403.754	37.0294
		32.7052	17.4083				105.821	24.513				306.156	12.1215				530.08	22.7745				404.354	37.1769				404.354	37.1769
		32.7252	17.4088				105.901	24.5504				306.757	12.1215				530.781	22.6201				404.955	37.3222				404.955	37.3222
		32.7452	17.4094				105.981	24.5872				307.357	12.1216				531.481	22.4654				405.556	37.4651				405.556	37.4651
		32.7653	17.4101				106.061	24.6233				307.958	12.1217				532.182	22.3103				406.156	37.6058				406.156	37.6058
		32.7853	17.4107				106.141	24.6587				308.559	12.1217				532.883	22.155				406.757	37.7442				406.757	37.7442
		32.8053	17.4114				106.221	24.6935				309.159	12.1218				533.584	21.9995				407.357	37.8802				407.357	37.8802
		32.8253	17.4122				106.301	24.7276				309.76	12.1218				534.284	21.8438				407.958	38.0138				407.958	38.0138
		32.8454	17.4129				106.381	24.761				310.36	12.1219				534.985	21.6879				408.559	38.1449				408.559	38.1449
		32.8654	17.4138				106.461	24.7937				310.961	12.1219				535.686	21.532				409.159	38.2736				409.159	38.2736
		32.8854	17.4146				106.542	24.8258				311.562	12.122				536.386	21.376				409.76	38.3997				409.76	38.3997
		32.9054	17.4155				106.622	24.8571				312.162	12.1221				537.087	21.22				410.36	38.5233				410.36	38.5233
		32.9254	17.4165				106.702	24.8878				312.763	12.1221				537.788	21.064				410.961	38.6444				410.961	38.6444
		32.9455	17.4175				106.782	24.9178				313.363	12.1222				538.488	20.9082				411.562	38.7628				411.562	38.7628
		32.9655	17.4185				106.862	24.947				313.964	12.1223				539.189	20.7524				412.162	38.8785				412.162	38.8785
		32.9855	17.4196				106.942	24.9756				314.565	12.1224				539.89	20.5968				412.763	38.9916				412.763	38.9916
		33.0055	17.4208				107.022	25.0035				315.165	12.1225				540.591	20.4415				413.363	39.102				413.363	39.102
		33.0255	17.422				107.102	25.0307				315.766	12.1226				541.291	20.2863				413.964	39.2096				413.964	39.2096
		33.0455	17.4233				107.182	25.0571				316.366	12.1227				541.992	20.1315				414.565	39.3145				414.565	39.3145
		33.0656	17.4246				107.262	25.0829				316.967	12.1227				542.693	19.9769				415.165	39.4166				415.165	39.4166
		33.0856	17.4261				107.342	25.1079				317.568	12.1228				543.393	19.8228				415.766	39.5158				415.766	39.5158
		33.1056	17.4275				107.422	25.1322				318.168	12.123				544.094	19.669				416.366	39.6122				416.366	39.6122
		33.1256	17.4291				107.502	25.1558				318.769	12.1231				544.795	19.5157				416.967	39.7057				416.967	39.7057
		33.1457	17.4307				107.583	25.1787				319.369	12.1232				545.495	19.3628				417.568	39.7963				417.568	39.7963
		33.1657	17.4324				107.663	25.2009				319.97	12.1233				546.196	19.2104				418.168	39.884				418.168	39.884
		33.1857	17.4342				107.743	25.2223				320.571	12.1235				546.897	19.0586				418.769	39.9687				418.769	39.9687
		33.2057	17.4362				107.823	25.2431				321.171	12.1236				547.598	18.9073				419.369	40.0504				419.369	40.0504
		33.2257	17.4381				107.903	25.263				321.772	12.1237				548.298	18.7567				419.97	40.1291				419.97	40.1291
		33.2458	17.4402				107.983	25.2823				322.372	12.1239				548.999	18.6067				420.571	40.2048				420.571	40.2048
		33.2658	17.4424				108.063	25.3008				322.973	12.124				549.7	18.4573				421.171	40.2775				421.171	40.2775
		33.2858	17.4447				108.143	25.3186				323.574	12.1242				550	18.3935				421.772	40.347				421.772	40.347
		33.3058	17.4471				108.223	25.3357				324.174	12.1244				550.4	18.3087				422.372	40.4135				422.372	40.4135
		33.3258	17.4496				108.303	25.352				324.775	12.1245				551.101	18.1608				422.973	40.4769				422.973	40.4769
		33.3458	17.4522				108.383	25.3676				325.375	12.1247				551.802	18.0136				423.574	40.5371				423.574	40.5371
		33.3659	17.455				108.463	25.3824				325.976	12.1249				552.503	17.8672				424.174	40.5943				424.174	40.5943
		33.3859	17.4578				108.544	25.3966				326.577	12.1251				553.203	17.7217				424.775	40.6482				424.775	40.6482
		33.4059	17.4608				108.624	25.4099				327.177	12.1253				553.904	17.577				425.375	40.699				425.375	40.699
		33.4259	17.464				108.704	25.4225				327.778	12.1256				554.605	17.4332				425.976	40.7466				425.976	40.7466
		33.446	17.4673				108.784	25.4344				328.378	12.1258				555.305	17.2902				426.577	40.791				426.577	40.791
		33.466	17.4707				108.864	25.4455				328.979	12.126				556.006	17.1482				427.177	40.8321				427.177	40.8321
		33.486	17.4743				108.944	25.4559				329.58	12.1263				556.707	17.0072				427.778	40.8701				427.778	40.8701
		33.506	17.4781				109.024	25.4656				330.18	12.1265				557.407	16.8671				428.378	40.9048				428.378	40.9048
		33.526	17.4821				109.104	25.4745				330.781	12.1268				558.108	16.728				428.979	40.9362				428.979	40.9362
		33.5461	17.4862				109.184	25.4826				331.381	12.1271				558.809	16.5899				429.58	40.9644				429.58	40.9644
		33.5661	17.4905				109.264	25.49				331.982	12.1274				559.51	16.4529				430.18	40.9894				430.18	40.9894
		33.5861	17.495				109.344	25.4966				332.583	12.1277				560.21	16.3169				430.781	41.011				430.781	41.011
		33.6061	17.4997				109.424	25.5025				333.183	12.128				560.911	16.182				431.381	41.0294				431.381	41.0294
		33.6261	17.5046				109.504	25.5076				333.784	12.1284				561.612	16.0481				431.982	41.0445				431.982	41.0445
		33.6461	17.5097				109.585	25.512				334.384	12.1287				562.312	15.9155				432.583	41.0563				432.583	41.0563
		33.6662	17.515				109.665	25.5156				334.985	12.1291				563.013	15.7839				433.183	41.0648				433.183	41.0648
		33.6862	17.5206				109.745	25.5185				335.586	12.1295				563.714	15.6535				433.784	41.0701				433.784	41.0701
		33.7062	17.5264				109.825	25.5206				336.186	12.1299				564.414	15.5242				434.384	41.072				434.384	41.072
		33.7262	17.5325				109.905	25.522				336.787	12.1303				565.115	15.3961				434.985	41.0706				434.985	41.0706
		33.7463	17.5388				109.985	25.5226				337.387	12.1307				565.816	15.2693				435.586	41.066				435.586	41.066
		33.7663	17.5454				110.065	25.5224				337.988	12.1312				566.517	15.1436				436.186	41.058				436.186	41.058
		33.7863	17.5522				110.145	25.5216				338.589	12.1316				567.217	15.0191				436.787	41.0468				436.787	41.0468
		33.8063	17.5594				110.225	25.5199				339.189	12.1321				567.918	14.8959				437.387	41.0322				437.387	41.0322
		33.8263	17.5668				110.305	25.5175				339.79	12.1326				568.619	14.774				437.988	41.0144				437.988	41.0144
		33.8464	17.5746				110.385	25.5143				340.39	12.1332				569.319	14.6532				438.589	40.9933				438.589	40.9933
		33.8664	17.5827				110.465	25.5104				340.991	12.1337				570.02	14.5338				439.189	40.9689				439.189	40.9689
		33.8864	17.5911				110.546	25.5057				341.592	12.1343				570.721	14.4156				439.79	40.9413				439.79	40.9413
		33.9064	17.5999				110.626	25.5003				342.192	12.1349				571.421	14.2988				440.39	40.9104				440.39	40.9104
		33.9264	17.609				110.706	25.4942				342.793	12.1355				572.122	14.1832				440.991	40.8762				440.991	40.8762
		33.9464	17.6185				110.786	25.4872				343.393	12.1362				572.823	14.0689				441.592	40.8389				441.592	40.8389
		33.9665	17.6283				110.866	25.4796				343.994	12.1368				573.524	13.9559				442.192	40.7982				442.192	40.7982
		33.9865	17.6386				110.946	25.4711				344.595	12.1375				574.224	13.8442				442.793	40.7544				442.793	40.7544
		34.0065	17.6492				111.026	25.462				345.195	12.1382				574.925	13.7339				443.393	40.7074				443.393	40.7074
		34.0265	17.6603				111.106	25.452				345.796	12.139				575.626	13.6248				443.994	40.6571				443.994	40.6571
		34.0466	17.6719				111.186	25.4414				346.396	12.1398				576.326	13.5171				444.595	40.6037				444.595	40.6037
		34.0666	17.6838				111.266	25.43				346.997	12.1406				577.027	13.4108				445.195	40.5472				445.195	40.5472
		34.0866	17.6963				111.346	25.4178				347.598	12.1414				577.728	13.3057				445.796	40.4874				445.796	40.4874
		34.1066	17.7092				111.426	25.4049				348.198	12.1423				578.428	13.202				446.396	40.4246				446.396	40.4246
		34.1266	17.7226				111.507	25.3912				348.799	12.1432				579.129	13.0997				446.997	40.3586				446.997	40.3586
		34.1467	17.7365				111.587	25.3769				349.399	12.1442				579.83	12.9987				447.598	40.2896				447.598	40.2896
		34.1667	17.7509				111.667	25.3617				350	12.1452				580.531	12.899				448.198	40.2175				448.198	40.2175
		34.1867	17.7659				111.747	25.3459				350.601	12.1462				581.231	12.8007				448.799	40.1423				448.799	40.1423
		34.2067	17.7814				111.827	25.3292				351.201	12.1472				581.932	12.7037				449.399	40.0641				449.399	40.0641
		34.2267	17.7976				111.907	25.3119				351.802	12.1483				582.633	12.608				450	39.9829				450	39.9829
		34.2467	17.8143				111.987	25.2938				352.402	12.1495				583.333	12.5137				450.601	39.8987				450.601	39.8987
		34.2668	17.8316				112.067	25.275				353.003	12.1507				584.034	12.4207				451.201	39.8115				451.201	39.8115
		34.2868	17.8496				112.147	25.2555				353.604	12.1519				584.735	12.3291				451.802	39.7214				451.802	39.7214
		34.3068	17.8682				112.227	25.2352				354.204	12.1532				585.435	12.2388				452.402	39.6284				452.402	39.6284
		34.3268	17.8875				112.307	25.2142				354.805	12.1545				586.136	12.1498				453.003	39.5325				453.003	39.5325
		34.3469	17.9074				112.387	25.1925				355.405	12.1559				586.837	12.0621				453.604	39.4338				453.604	39.4338
		34.3669	17.9281				112.467	25.1701				356.006	12.1573				587.538	11.9758				454.204	39.3322				454.204	39.3322
		34.3869	17.9495				112.548	25.1469				356.607	12.1588				588.238	11.8908				454.805	39.2278				454.805	39.2278
		34.4069	17.9716				112.628	25.123				357.207	12.1603				588.939	11.807				455.405	39.1206				455.405	39.1206
		34.4269	17.9945				112.708	25.0984				357.808	12.1619				589.64	11.7246				456.006	39.0107				456.006	39.0107
		34.447	18.0182				112.788	25.0731				358.408	12.1635				590.34	11.6435				456.607	38.8981				456.607	38.8981
		34.467	18.0428				112.868	25.0471				359.009	12.1652				591.041	11.5637				457.207	38.7828				457.207	38.7828
		34.487	18.0681				112.948	25.0204				359.61	12.167				591.742	11.4851				457.808	38.6648				457.808	38.6648
		34.507	18.0943				113.028	24.9929				360.21	12.1688				592.442	11.4079				458.408	38.5442				458.408	38.5442
		34.527	18.1214				113.108	24.9648				360.811	12.1707				593.143	11.3319				459.009	38.4211				459.009	38.4211
		34.547	18.1494				113.188	24.9359				361.411	12.1727				593.844	11.2571				459.61	38.2953				459.61	38.2953
		34.5671	18.1783				113.268	24.9064				362.012	12.1747				594.545	11.1836				460.21	38.1671				460.21	38.1671
		34.5871	18.2082				113.348	24.8761				362.613	12.1768				595.245	11.1114				460.811	38.0364				460.811	38.0364
		34.6071	18.239				113.428	24.8452				363.213	12.179				595.946	11.0404				461.411	37.9032				461.411	37.9032
		34.6271	18.2708				113.509	24.8136				363.814	12.1812				596.647	10.9706				462.012	37.7676				462.012	37.7676
		34.6472	18.3037				113.589	24.7813				364.414	12.1835				597.347	10.902				462.613	37.6297				462.613	37.6297
		34.6672	18.3376				113.669	24.7483				365.015	12.1859				598.048	10.8347				463.213	37.4894				463.213	37.4894
		34.6872	18.3726				113.749	24.7146				365.616	12.1884				598.749	10.7685				463.814	37.3468				463.814	37.3468
		34.7072	18.4086				113.829	24.6803				366.216	12.191				599.449	10.7036				464.414	37.2019				464.414	37.2019
		34.7272	18.4458				113.909	24.6453				366.817	12.1937				600.15	10.6398				465.015	37.0548				465.015	37.0548
		34.7473	18.4841				113.989	24.6096				367.417	12.1964				600.851	10.5771				465.616	36.9056				465.616	36.9056
		34.7673	18.5237				114.069	24.5732				368.018	12.1993				601.552	10.5157				466.216	36.7542				466.216	36.7542
		34.7873	18.5644				114.149	24.5362				368.619	12.2022				602.252	10.4553				466.817	36.6006				466.817	36.6006
		34.8073	18.6063				114.229	24.4985				369.219	12.2053				602.953	10.3961				467.417	36.445				467.417	36.445
		34.8273	18.6495				114.309	24.4602				369.82	12.2084				603.654	10.338				468.018	36.2874				468.018	36.2874
		34.8473	18.694				114.389	24.4212				370.42	12.2117				604.354	10.2811				468.619	36.1278				468.619	36.1278
		34.8674	18.7398				114.469	24.3815				371.021	12.215				605.055	10.2252				469.219	35.9663				469.219	35.9663
		34.8874	18.787				114.55	24.3412				371.622	12.2185				605.756	10.1704				469.82	35.8028				469.82	35.8028
		34.9074	18.8355				114.63	24.3003				372.222	12.222				606.456	10.1167				470.42	35.6375				470.42	35.6375
		34.9274	18.8853				114.71	24.2587				372.823	12.2257				607.157	10.064				471.021	35.4704				471.021	35.4704
		34.9475	18.9367				114.79	24.2165				373.423	12.2296				607.858	10.0124				471.622	35.3015				471.622	35.3015
		34.9675	18.9894				114.87	24.1737				374.024	12.2335				608.559	9.96186				472.222	35.1309				472.222	35.1309
		34.9875	19.0436				114.95	24.1302				374.625	12.2376				609.259	9.91231				472.823	34.9585				472.823	34.9585
		35.0075	19.0994				115	24.1027				375.225	12.2418				609.96	9.86377				473.423	34.7846				473.423	34.7846
		35.0275	19.1566				115.03	24.0861				375.826	12.2461				610.661	9.81623				474.024	34.609				474.024	34.609
		35.0476	19.2155				115.11	24.0414				376.426	12.2506				611.361	9.76967				474.625	34.4319				474.625	34.4319
		35.0676	19.2759				115.19	23.9961				377.027	12.2552				612.062	9.72409				475.225	34.2532				475.225	34.2532
		35.0876	19.3379				115.27	23.9501				377.628	12.2599				612.763	9.67946				475.826	34.0731				475.826	34.0731
		35.1076	19.4016				115.35	23.9036				378.228	12.2648				613.463	9.63579				476.426	33.8916				476.426	33.8916
		35.1276	19.4669				115.43	23.8564				378.829	12.2699				614.164	9.59304				477.027	33.7086				477.027	33.7086
		35.1476	19.534				115.511	23.8087				379.429	12.2751				614.865	9.55121				477.628	33.5244				477.628	33.5244
		35.1677	19.6027				115.591	23.7603				380.03	12.2805				615.566	9.51029				478.228	33.3388				478.228	33.3388
		35.1877	19.6732				115.671	23.7114				380.631	12.286				616.266	9.47026				478.829	33.152				478.829	33.152
		35.2077	19.7455				115.751	23.6619				381.231	12.2917				616.967	9.43111				479.429	32.964				479.429	32.964
		35.2277	19.8196				115.831	23.6118				381.832	12.2975				617.668	9.39283				480.03	32.7748				480.03	32.7748
		35.2478	19.8956				115.911	23.5612				382.432	12.3036				618.368	9.35541				480.631	32.5845				480.631	32.5845
		35.2678	19.9734				115.991	23.5099				383.033	12.3098				619.069	9.31882				481.231	32.3931				481.231	32.3931
		35.2878	20.0531				116.071	23.4581				383.634	12.3163				619.77	9.28306				481.832	32.2007				481.832	32.2007
		35.3078	20.1347				116.151	23.4057				384.234	12.3229				620.47	9.24812				482.432	32.0074				482.432	32.0074
		35.3278	20.2182				116.231	23.3528				384.835	12.3297				621.171	9.21397				483.033	31.8131				483.033	31.8131
		35.3479	20.3037				116.311	23.2993				385.435	12.3367				621.872	9.18062				483.634	31.6179				483.634	31.6179
		35.3679	20.3911				116.391	23.2453				386.036	12.3439				622.573	9.14804				484.234	31.4218				484.234	31.4218
		35.3879	20.4806				116.471	23.1907				386.637	12.3513				623.273	9.11622				484.835	31.2249				484.835	31.2249
		35.4079	20.5721				116.552	23.1356				387.237	12.3589				623.974	9.08515				485.435	31.0273				485.435	31.0273
		35.4279	20.6657				116.632	23.08				387.838	12.3668				624.675	9.05482				486.036	30.829				486.036	30.829
		35.4479	20.7613				116.712	23.0238				388.438	12.3748				625.375	9.02521				486.637	30.63				486.637	30.63
		35.468	20.8591				116.792	22.9671				389.039	12.3832				626.076	8.99632				487.237	30.4303				487.237	30.4303
		35.488	20.9589				116.872	22.9099				389.64	12.3917				626.777	8.96812				487.838	30.2301				487.838	30.2301
		35.508	21.0609				116.952	22.8522				390.24	12.4005				627.477	8.94061				488.438	30.0293				488.438	30.0293
		35.528	21.1651				117.032	22.794				390.841	12.4095				628.178	8.91377				489.039	29.828				489.039	29.828
		35.5481	21.2714				117.112	22.7353				391.441	12.4187				628.879	8.88759				489.64	29.6263				489.64	29.6263
		35.5681	21.3799				117.192	22.676				392.042	12.4283				629.58	8.86206				490.24	29.4242				490.24	29.4242
		35.5881	21.4906				117.272	22.6163				392.643	12.4381				630.28	8.83717				490.841	29.2217				490.841	29.2217
		35.6081	21.6036				117.352	22.5561				393.243	12.4481				630.981	8.81291				491.441	29.0188				491.441	29.0188
		35.6281	21.7188				117.432	22.4954				393.844	12.4585				631.682	8.78925				492.042	28.8157				492.042	28.8157
		35.6482	21.8363				117.513	22.4342				394.444	12.4691				632.382	8.7662				492.643	28.6123				492.643	28.6123
		35.6682	21.956				117.593	22.3726				395.045	12.48				633.083	8.74374				493.243	28.4087				493.243	28.4087
		35.6882	22.078				117.673	22.3105				395.646	12.4911				633.784	8.72185				493.844	28.205				493.844	28.205
		35.7082	22.2023				117.753	22.2479				396.246	12.5026				634.484	8.70053				494.444	28.0011				494.444	28.0011
		35.7282	22.3289				117.833	22.1849				396.847	12.5144				635.185	8.67977				495.045	27.7971				495.045	27.7971
		35.7482	22.4578				117.913	22.1214				397.447	12.5265				635.886	8.65954				495.646	27.5931				495.646	27.5931
		35.7683	22.589				117.993	22.0575				398.048	12.5389				636.587	8.63986				496.246	27.3891				496.246	27.3891
		35.7883	22.7225				118.073	21.9932				398.649	12.5516				637.287	8.62069				496.847	27.1851				496.847	27.1851
		35.8083	22.8584				118.153	21.9284				399.249	12.5647				637.988	8.60203				497.447	26.9812				497.447	26.9812
		35.8283	22.9966				118.233	21.8632				399.85	12.5781				638.689	8.58387				498.048	26.7774				498.048	26.7774
		35.8484	23.1371				118.313	21.7976				400.45	12.5918				639.389	8.5662				498.649	26.5738				498.649	26.5738
		35.8684	23.28				118.393	21.7315				401.051	12.6059				640.09	8.54901				499.249	26.3703				499.249	26.3703
		35.8884	23.4252				118.473	21.6651				401.652	12.6203				640.791	8.53229				499.85	26.1671				499.85	26.1671
		35.9084	23.5727				118.554	21.5982				402.252	12.6351				641.491	8.51602				500.45	25.9641				500.45	25.9641
		35.9284	23.7226				118.634	21.5309				402.853	12.6502				642.192	8.5002				501.051	25.7614				501.051	25.7614
		35.9485	23.8748				118.714	21.4633				403.453	12.6657				642.893	8.48483				501.652	25.5591				501.652	25.5591
		35.9685	24.0293				118.794	21.3952				404.054	12.6816				643.594	8.46987				502.252	25.3571				502.252	25.3571
		35.9885	24.1861				118.874	21.3268				404.655	12.6979				644.294	8.45534				502.853	25.1555				502.853	25.1555
		36.0085	24.3452				118.954	21.258				405.255	12.7146				644.995	8.44122				503.453	24.9544				503.453	24.9544
		36.0285	24.5066				119.034	21.1888				405.856	12.7317				645.696	8.42749				504.054	24.7537				504.054	24.7537
		36.0485	24.6702				119.114	21.1193				406.456	12.7492				646.396	8.41416				504.655	24.5535				504.655	24.5535
		36.0686	24.8362				119.194	21.0494				407.057	12.767				647.097	8.4012				505.255	24.3539				505.255	24.3539
		36.0886	25.0043				119.274	20.9791				407.658	12.7854				647.798	8.38862				505.856	24.1548				505.856	24.1548
		36.1086	25.1747				119.354	20.9085				408.258	12.8041				648.499	8.3764				506.456	23.9563				506.456	23.9563
		36.1286	25.3473				119.434	20.8376				408.859	12.8233				649.199	8.36454				507.057	23.7585				507.057	23.7585
		36.1487	25.5221				119.515	20.7663				409.459	12.8429				649.9	8.35302				507.658	23.5613				507.658	23.5613
		36.1687	25.699				119.595	20.6947				410.06	12.8629				650	8.3514				508.258	23.3648				508.258	23.3648
		36.1887	25.8781				119.675	20.6227				410.661	12.8835				650.601	8.34184				508.859	23.169				508.859	23.169
		36.2087	26.0592				119.755	20.5505				411.261	12.9044				651.301	8.33099				509.459	22.974				509.459	22.974
		36.2287	26.2425				119.835	20.4779				411.862	12.9259				652.002	8.32046				510.06	22.7797				510.06	22.7797
		36.2488	26.4278				119.915	20.405				412.462	12.9478				652.703	8.31024				510.661	22.5863				510.661	22.5863
		36.2688	26.6151				119.995	20.3319				413.063	12.9702				653.403	8.30033				511.261	22.3937				511.261	22.3937
		36.2888	26.8044				120.075	20.2584				413.664	12.9931				654.104	8.29072				511.862	22.2019				511.862	22.2019
		36.3088	26.9956				120.155	20.1846				414.264	13.0165				654.805	8.2814				512.462	22.011				512.462	22.011
		36.3288	27.1887				120.235	20.1106				414.865	13.0403				655.506	8.27236				513.063	21.821				513.063	21.821
		36.3488	27.3837				120.315	20.0363				415.465	13.0647				656.206	8.2636				513.664	21.632				513.664	21.632
		36.3689	27.5805				120.395	19.9617				416.066	13.0896				656.907	8.2551				514.264	21.444				514.264	21.444
		36.3889	27.779				120.475	19.8868				416.667	13.1151				657.608	8.24687				514.865	21.2569				514.865	21.2569
		36.4089	27.9793				120.556	19.8117				417.267	13.141				658.308	8.23889				515.465	21.0708				515.465	21.0708
		36.4289	28.1813				120.636	19.7363				417.868	13.1675				659.009	8.23116				516.066	20.8857				516.066	20.8857
		36.449	28.3849				120.716	19.6607				418.468	13.1946				659.71	8.22367				516.667	20.7017				516.667	20.7017
		36.469	28.59				120.796	19.5848				419.069	13.2221				660.41	8.21642				517.267	20.5188				517.267	20.5188
		36.489	28.7967				120.876	19.5087				419.67	13.2503				661.111	8.20939				517.868	20.337				517.868	20.337
		36.509	29.0049				120.956	19.4324				420.27	13.279				661.812	8.20259				518.468	20.1562				518.468	20.1562
		36.529	29.2144				121.036	19.3558				420.871	13.3083				662.513	8.196				519.069	19.9766				519.069	19.9766
		36.5491	29.4253				121.116	19.2791				421.471	13.3381				663.213	8.18963				519.67	19.7982				519.67	19.7982
		36.5691	29.6374				121.196	19.2021				422.072	13.3685				663.914	8.18346				520.27	19.6209				520.27	19.6209
		36.5891	29.8508				121.276	19.1249				422.673	13.3996				664.615	8.17749				520.871	19.4448				520.871	19.4448
		36.6091	30.0653				121.356	19.0475				423.273	13.4312				665.315	8.17171				521.471	19.27				521.471	19.27
		36.6291	30.281				121.436	18.9699				423.874	13.4634				666.016	8.16612				522.072	19.0963				522.072	19.0963
		36.6491	30.4976				121.517	18.8921				424.474	13.4962				666.717	8.16071				522.673	18.9239				522.673	18.9239
		36.6692	30.7151				121.597	18.8142				425.075	13.5296				667.417	8.15548				523.273	18.7528				523.273	18.7528
		36.6892	30.9336				121.677	18.736				425.676	13.5637				668.118	8.15042				523.874	18.5829				523.874	18.5829
		36.7092	31.1528				121.757	18.6577				426.276	13.5983				668.819	8.14553				524.474	18.4143				524.474	18.4143
		36.7292	31.3727				121.837	18.5792				426.877	13.6336				669.52	8.14081				525.075	18.2469				525.075	18.2469
		36.7493	31.5933				121.917	18.5006				427.477	13.6695				670.22	8.13624				525.676	18.081				525.676	18.081
		36.7693	31.8144				121.997	18.4218				428.078	13.7061				670.921	8.13182				526.276	17.9163				526.276	17.9163
		36.7893	32.036				122.077	18.3428				428.679	13.7433				671.622	8.12756				526.877	17.7529				526.877	17.7529
		36.8093	32.258				122.157	18.2638				429.279	13.7811				672.322	8.12343				527.477	17.591				527.477	17.591
		36.8293	32.4802				122.237	18.1845				429.88	13.8196				673.023	8.11945				528.078	17.4303				528.078	17.4303
		36.8494	32.7028				122.317	18.1052				430.48	13.8588				673.724	8.1156				528.679	17.2711				528.679	17.2711
		36.8694	32.9254				122.397	18.0257				431.081	13.8986				674.424	8.11189				529.279	17.1132				529.279	17.1132
		36.8894	33.1481				122.477	17.9461				431.682	13.9391				675.125	8.1083				529.88	16.9567				529.88	16.9567
		36.9094	33.3707				122.558	17.8664				432.282	13.9803				675.826	8.10484				530.48	16.8016				530.48	16.8016
		36.9294	33.5932				122.638	17.7866				432.883	14.0221				676.527	8.1015				531.081	16.6479				531.081	16.6479
		36.9494	33.8155				122.718	17.7066				433.483	14.0646				677.227	8.09827				531.682	16.4956				531.682	16.4956
		36.9695	34.0374				122.798	17.6266				434.084	14.1078				677.928	8.09516				532.282	16.3448				532.282	16.3448
		36.9895	34.2589				122.878	17.5465				434.685	14.1517				678.629	8.09216				532.883	16.1953				532.883	16.1953
		37.0095	34.4799				122.958	17.4663				435.285	14.1962				679.329	8.08926				533.483	16.0473				533.483	16.0473
		37.0295	34.7003				123.038	17.386				435.886	14.2415				680.03	8.08647				534.084	15.9008				534.084	15.9008
		37.0496	34.9199				123.118	17.3056				436.486	14.2874				680.731	8.08377				534.685	15.7556				534.685	15.7556
		37.0696	35.1388				123.198	17.2252				437.087	14.3341				681.431	8.08117				535.285	15.612				535.285	15.612
		37.0896	35.3567				123.278	17.1447				437.688	14.3814				682.132	8.07867				535.886	15.4698				535.886	15.4698
		37.1096	35.5736				123.358	17.0642				438.288	14.4295				682.833	8.07625				536.486	15.329				536.486	15.329
		37.1296	35.7895				123.438	16.9836				438.889	14.4782				683.534	8.07392				537.087	15.1897				537.087	15.1897
		37.1497	36.004				123.519	16.9029				439.489	14.5276				684.234	8.07168				537.688	15.0519				537.688	15.0519
		37.1697	36.2173				123.599	16.8222				440.09	14.5778				684.935	8.06952				538.288	14.9155				538.288	14.9155
		37.1897	36.4292				123.679	16.7415				440.691	14.6286				685.636	8.06743				538.889	14.7806				538.889	14.7806
		37.2097	36.6395				123.759	16.6607				441.291	14.6802				686.336	8.06543				539.489	14.6472				539.489	14.6472
		37.2297	36.8483				123.839	16.5799				441.892	14.7325				687.037	8.06349				540.09	14.5153				540.09	14.5153
		37.2497	37.0553				123.919	16.4991				442.492	14.7854				687.738	8.06163				540.691	14.3848				540.691	14.3848
		37.2698	37.2604				123.999	16.4183				443.093	14.8391				688.438	8.05984				541.291	14.2558				541.291	14.2558
		37.2898	37.4637				124.319	16.0949				443.694	14.8935				689.139	8.05812				541.892	14.1282				541.892	14.1282
		37.3098	37.6649				124.399	16.0141				444.294	14.9486				689.84	8.05646				542.492	14.0021				542.492	14.0021
		37.3298	37.8639				124.479	15.9333				444.895	15.0044				690.541	8.05486				543.093	13.8775				543.093	13.8775
		37.3499	38.0608				124.56	15.8525				445.495	15.0609				691.241	8.05332				543.694	13.7544				543.694	13.7544
		37.3699	38.2552				124.64	15.7717				446.096	15.118				691.942	8.05184				544.294	13.6327				544.294	13.6327
		37.3899	38.4473				124.72	15.691				446.697	15.1759				692.643	8.05042				544.895	13.5125				544.895	13.5125
		37.4099	38.6368				124.8	15.6103				447.297	15.2345				693.343	8.04905				545.495	13.3938				545.495	13.3938
		37.4299	38.8237				124.88	15.5296				447.898	15.2938				694.044	8.04773				546.096	13.2765				546.096	13.2765
		37.45	39.0078				124.96	15.449				448.498	15.3538				694.745	8.04647				546.697	13.1606				546.697	13.1606
		37.47	39.1891				125	15.4087				449.099	15.4144				695.445	8.04525				547.297	13.0463				547.297	13.0463
		37.49	39.3674				125.04	15.3684				449.7	15.4757				696.146	8.04408				547.898	12.9333				547.898	12.9333
		37.5	39.4554				125.12	15.2879				450	15.5067				696.847	8.04295				548.499	12.8218				548.499	12.8218
		37.51	39.5427				125.2	15.2075				450.3	15.5378				697.548	8.04187				549.099	12.7118				549.099	12.7118
		37.53	39.7149				125.28	15.1271				450.901	15.6005				698.248	8.04084				549.7	12.6031				549.7	12.6031
		37.55	39.8838				125.36	15.0468				451.502	15.6638				698.949	8.03984				550	12.5494				550	12.5494
		37.5701	40.0494				125.44	14.9665				452.102	15.7279				699.65	8.03888				550.3	12.4959				550.3	12.4959
		37.5901	40.2116				125.521	14.8864				452.703	15.7925				700.35	8.03796				550.901	12.3901				550.901	12.3901
		37.6101	40.3704				125.601	14.8063				453.303	15.8579				701.051	8.03707				551.501	12.2858				551.501	12.2858
		37.6301	40.5255				125.681	14.7263				453.904	15.9239				701.752	8.03623				552.102	12.1828				552.102	12.1828
		37.6501	40.6769				125.761	14.6464				454.505	15.9905				702.452	8.03541				552.703	12.0813				552.703	12.0813
		37.6702	40.8246				125.841	14.5666				455.105	16.0577				703.153	8.03463				553.303	11.9811				553.303	11.9811
		37.6902	40.9684				125.921	14.4869				455.706	16.1256				703.854	8.03388				553.904	11.8823				553.904	11.8823
		37.7102	41.1084				126.001	14.4073				456.306	16.1941				704.555	8.03316				554.505	11.7849				554.505	11.7849
		37.7302	41.2443				126.081	14.3278				456.907	16.2633				705.255	8.03247				555.105	11.6889				555.105	11.6889
		37.7503	41.3761				126.161	14.2484				457.508	16.333				705.956	8.0318				555.706	11.5943				555.706	11.5943
		37.7703	41.5037				126.241	14.1692				458.108	16.4033				706.657	8.03117				556.306	11.5009				556.306	11.5009
		37.7903	41.6271				126.321	14.09				458.709	16.4742				707.357	8.03056				556.907	11.409				556.907	11.409
		37.8103	41.7462				126.401	14.011				459.309	16.5456				708.058	8.02997				557.508	11.3184				557.508	11.3184
		37.8303	41.8609				126.481	13.9322				459.91	16.6177				708.759	8.02941				558.108	11.2291				558.108	11.2291
		37.8503	41.9712				126.562	13.8534				460.511	16.6903				709.459	8.02887				558.709	11.1411				558.709	11.1411
		37.8704	42.0769				126.642	13.7749				461.111	16.7634				710.16	8.02836				559.309	11.0545				559.309	11.0545
		37.8904	42.1781				126.722	13.6964				461.712	16.8371				710.861	8.02787				559.91	10.9692				559.91	10.9692
		37.9104	42.2747				126.802	13.6181				462.312	16.9112				711.562	8.02739				560.511	10.8851				560.511	10.8851
		37.9304	42.3665				126.882	13.5399				462.913	16.9859				712.262	8.02694				561.111	10.8024				561.111	10.8024
		37.9504	42.4536				126.962	13.462				463.514	17.0611				712.963	8.02651				561.712	10.7209				561.712	10.7209
		37.9705	42.5359				127.042	13.3841				464.114	17.1367				713.664	8.02609				562.312	10.6406				562.312	10.6406
		37.9905	42.6134				127.122	13.3064				464.715	17.2129				714.364	8.02569				562.913	10.5617				562.913	10.5617
		38.0105	42.686				127.202	13.2289				465.315	17.2895				715.065	8.02531				563.514	10.4839				563.514	10.4839
		38.0305	42.7536				127.282	13.1516				465.916	17.3665				715.766	8.02494				564.114	10.4074				564.114	10.4074
		38.0506	42.8162				127.362	13.0745				466.517	17.4439				716.466	8.02459				564.715	10.3322				564.715	10.3322
		38.0706	42.8739				127.442	12.9975				467.117	17.5218				717.167	8.02426				565.315	10.2581				565.315	10.2581
		38.0906	42.9265				127.523	12.9207				467.718	17.6001				717.868	8.02394				565.916	10.1852				565.916	10.1852
		38.1106	42.974				127.603	12.8441				468.318	17.6787				718.569	8.02363				566.517	10.1136				566.517	10.1136
		38.1306	43.0163				127.683	12.7677				468.919	17.7577				719.269	8.02334				567.117	10.0431				567.117	10.0431
		38.1506	43.0536				127.763	12.6915				469.52	17.8371				719.97	8.02306				567.718	9.97373				567.718	9.97373
		38.1707	43.0857				127.843	12.6154				470.12	17.9167				720.671	8.02279				568.318	9.90556				568.318	9.90556
		38.1907	43.1126				127.923	12.5396				470.721	17.9967				721.371	8.02254				568.919	9.83853				568.919	9.83853
		38.2107	43.1343				128.003	12.464				471.321	18.077				722.072	8.02229				569.52	9.77263				569.52	9.77263
		38.2307	43.1508				128.083	12.3886				471.922	18.1576				722.773	8.02206				570.12	9.70785				570.12	9.70785
		38.2507	43.1621				128.163	12.3134				472.523	18.2385				723.473	8.02183				570.721	9.64418				570.721	9.64418
		38.2708	43.1682				128.243	12.2384				473.123	18.3195				724.174	8.02162				571.321	9.58161				571.321	9.58161
		38.2908	43.169				128.323	12.1636				473.724	18.4008				724.875	8.02141				571.922	9.52013				571.922	9.52013
		38.3108	43.1646				128.403	12.0891				474.324	18.4823				725.576	8.02122				572.523	9.45971				572.523	9.45971
		38.3308	43.155				128.483	12.0147				474.925	18.564				726.276	8.02103				573.123	9.40036				573.123	9.40036
		38.3509	43.1401				128.564	11.9406				475.526	18.6459				726.977	8.02085				573.724	9.34206				573.724	9.34206
		38.3709	43.1201				128.644	11.8668				476.126	18.7279				727.678	8.02068				574.324	9.2848				574.324	9.2848
		38.3909	43.0948				128.724	11.7931				476.727	18.81				728.378	8.02052				574.925	9.22856				574.925	9.22856
		38.4109	43.0644				128.804	11.7197				477.327	18.8922				729.079	8.02037				575.526	9.17334				575.526	9.17334
		38.4309	43.0288				128.884	11.6465				477.928	18.9745				729.78	8.02022				576.126	9.11912				576.126	9.11912
		38.4509	42.988				128.964	11.5736				478.529	19.0569				730.48	8.02008				576.727	9.06588				576.727	9.06588
		38.471	42.9421				129.044	11.5009				479.129	19.1393				731.181	8.01994				577.327	9.01363				577.327	9.01363
		38.491	42.8912				129.124	11.4285				479.73	19.2217				731.882	8.01981				577.928	8.96234				577.928	8.96234
		38.511	42.8351				129.204	11.3563				480.33	19.3041				732.583	8.01969				578.529	8.912				578.529	8.912
		38.531	42.7741				129.284	11.2844				480.931	19.3865				733.283	8.01957				579.129	8.8626				579.129	8.8626
		38.551	42.708				129.364	11.2127				481.532	19.4689				733.984	8.01946				579.73	8.81413				579.73	8.81413
		38.5711	42.637				129.444	11.1413				482.132	19.5511				734.685	8.01935				580.33	8.76658				580.33	8.76658
		38.5911	42.5611				129.525	11.0701				482.733	19.6333				735.385	8.01925				580.931	8.71994				580.931	8.71994
		38.6111	42.4804				129.605	10.9992				483.333	19.7153				736.086	8.01916				581.532	8.67418				581.532	8.67418
		38.6311	42.3948				129.685	10.9286				483.934	19.7972				736.787	8.01906				582.132	8.62931				582.132	8.62931
		38.6512	42.3044				129.765	10.8583				484.535	19.879				737.487	8.01898				582.733	8.58531				582.733	8.58531
		38.6712	42.2094				129.845	10.7882				485.135	19.9605				738.188	8.01889				583.333	8.54216				583.333	8.54216
		38.6912	42.1096				129.925	10.7183				485.736	20.0418				738.889	8.01881				583.934	8.49986				583.934	8.49986
		38.7112	42.0053				130.005	10.6488				486.336	20.1229				739.59	8.01874				584.535	8.45839				584.535	8.45839
		38.7312	41.8965				130.085	10.5795				486.937	20.2037				740.29	8.01866				585.135	8.41774				585.135	8.41774
		38.7512	41.7832				130.165	10.5106				487.538	20.2843				740.991	8.01859				585.736	8.3779				585.736	8.3779
		38.7713	41.6655				130.245	10.4418				488.138	20.3645				741.692	8.01853				586.336	8.33886				586.336	8.33886
		38.7913	41.5434				130.325	10.3734				488.739	20.4444				742.392	8.01846				586.937	8.30061				586.937	8.30061
		38.8113	41.4171				130.405	10.3053				489.339	20.5239				743.093	8.01841				587.538	8.26312				587.538	8.26312
		38.8313	41.2867				130.485	10.2374				489.94	20.603				743.794	8.01835				588.138	8.2264				588.138	8.2264
		38.8513	41.1521				130.566	10.1699				490.541	20.6817				744.494	8.01829				588.739	8.19044				588.739	8.19044
		38.8714	41.0134				130.646	10.1026				491.141	20.7599				745.195	8.01824				589.339	8.15521				589.339	8.15521
		38.8914	40.8708				130.726	10.0356				491.742	20.8377				745.896	8.01819				589.94	8.12071				589.94	8.12071
		38.9114	40.7244				130.806	9.96895				492.342	20.915				746.597	8.01815				590.541	8.08693				590.541	8.08693
		38.9314	40.5741				130.886	9.90256				492.943	20.9918				747.297	8.0181				591.141	8.05385				591.141	8.05385
		38.9515	40.4201				130.966	9.83648				493.544	21.0681				747.998	8.01806				591.742	8.02147				591.742	8.02147
		38.9715	40.2625				131.046	9.77069				494.144	21.1437				748.699	8.01802				592.342	7.98977				592.342	7.98977
		38.9915	40.1014				131.126	9.70521				494.745	21.2188				749.399	8.01798				592.943	7.95874				592.943	7.95874
		39.0115	39.9369				131.206	9.64003				495.345	21.2933				750	8.01795				593.544	7.92838				593.544	7.92838
		39.0315	39.769				131.286	9.57516				495.946	21.3671				750.1	8.01795				594.144	7.89866				594.144	7.89866
		39.0515	39.5978				131.366	9.5106				496.547	21.4403				750.801	8.01791				594.745	7.86959				594.745	7.86959
		39.0716	39.4235				131.446	9.44634				497.147	21.5127				751.501	8.01788				595.345	7.84115				595.345	7.84115
		39.0916	39.2461				131.527	9.38239				497.748	21.5845				752.202	8.01785				595.946	7.81332				595.946	7.81332
		39.1116	39.0658				131.607	9.31876				498.348	21.6554				752.903	8.01782				596.547	7.7861				596.547	7.7861
		39.1316	38.8826				131.687	9.25544				498.949	21.7257				753.604	8.01779				597.147	7.75948				597.147	7.75948
		39.1516	38.6966				131.767	9.19243				499.55	21.7951				754.304	8.01776				597.748	7.73345				597.748	7.73345
		39.1717	38.5079				131.847	9.12974				500.15	21.8637				755.005	8.01774				598.348	7.708				598.348	7.708
		39.1917	38.3167				131.927	9.06736				500.751	21.9315				755.706	8.01772				598.949	7.68311				598.949	7.68311
		39.2117	38.1229				132.007	9.0053				501.351	21.9984				756.406	8.01769				599.55	7.65878				599.55	7.65878
		39.2317	37.9268				132.087	8.94356				501.952	22.0644				757.107	8.01767				600.15	7.635				600.15	7.635
		39.2518	37.7285				132.167	8.88214				502.553	22.1295				757.808	8.01765				600.751	7.61176				600.751	7.61176
		39.2718	37.5279				132.247	8.82105				503.153	22.1937				758.509	8.01763				601.351	7.58904				601.351	7.58904
		39.2918	37.3253				132.327	8.76027				503.754	22.2568				759.209	8.01761				601.952	7.56684				601.952	7.56684
		39.3118	37.1208				132.407	8.69982				504.354	22.3191				759.91	8.01759				602.553	7.54515				602.553	7.54515
		39.3318	36.9143				132.487	8.63969				504.955	22.3803				760.611	8.01758				603.153	7.52397				603.153	7.52397
		39.3518	36.7062				132.568	8.57989				505.556	22.4404				761.311	8.01756				603.754	7.50327				603.754	7.50327
		39.3719	36.4963				132.648	8.52042				506.156	22.4995				762.012	8.01755				604.354	7.48305				604.354	7.48305
		39.3919	36.2849				132.728	8.46127				506.757	22.5576				762.713	8.01753				604.955	7.46331				604.955	7.46331
		39.4119	36.0721				132.808	8.40245				507.357	22.6145				763.413	8.01752				605.556	7.44402				605.556	7.44402
		39.4319	35.8579				132.888	8.34396				507.958	22.6703				764.114	8.01751				606.156	7.4252				606.156	7.4252
		39.4519	35.6425				132.968	8.2858				508.559	22.725				764.815	8.01749				606.757	7.40682				606.757	7.40682
		39.472	35.4259				133.048	8.22796				509.159	22.7785				765.516	8.01748				607.357	7.38887				607.357	7.38887
		39.492	35.2082				133.128	8.17046				509.76	22.8309				766.216	8.01747				607.958	7.37136				607.958	7.37136
		39.512	34.9897				133.208	8.11329				510.36	22.882				766.917	8.01746				608.559	7.35426				608.559	7.35426
		39.532	34.7703				133.288	8.05646				510.961	22.9319				767.618	8.01745				609.159	7.33758				609.159	7.33758
		39.5521	34.5501				133.368	7.99995				511.562	22.9806				768.318	8.01744				609.76	7.3213				609.76	7.3213
		39.5721	34.3293				133.448	7.94378				512.162	23.028				769.019	8.01743				610.36	7.30541				610.36	7.30541
		39.5921	34.1079				133.529	7.88794				512.763	23.0741				769.72	8.01743				610.961	7.28992				610.961	7.28992
		39.6121	33.8861				133.609	7.83244				513.363	23.119				770.42	8.01742				611.562	7.2748				611.562	7.2748
		39.6321	33.664				133.689	7.77727				513.964	23.1625				771.121	8.01741				612.162	7.26006				612.162	7.26006
		39.6521	33.4415				133.769	7.72243				514.565	23.2047				771.822	8.0174				612.763	7.24568				612.763	7.24568
		39.6722	33.2189				133.849	7.66793				515.165	23.2456				772.523	8.0174				613.363	7.23165				613.363	7.23165
		39.6922	32.9963				133.929	7.61377				515.766	23.285				773.223	8.01739				613.964	7.21798				613.964	7.21798
		39.7122	32.7736				134.009	7.55994				516.366	23.3232				773.924	8.01739				614.565	7.20465				614.565	7.20465
		39.7322	32.551				134.089	7.50645				516.967	23.3599				774.625	8.01738				615.165	7.19165				615.165	7.19165
		39.7522	32.3287				134.169	7.45329				517.568	23.3952				775.325	8.01737				615.766	7.17899				615.766	7.17899
		39.7723	32.1066				134.249	7.40047				518.168	23.4291				776.026	8.01737				616.366	7.16664				616.366	7.16664
		39.7923	31.8849				134.329	7.34798				518.769	23.4615				776.727	8.01736				616.967	7.15461				616.967	7.15461
		39.8123	31.6636				134.409	7.29584				519.369	23.4926				777.427	8.01736				617.568	7.14289				617.568	7.14289
		39.8323	31.4428				134.489	7.24403				519.97	23.5221				778.128	8.01736				618.168	7.13146				618.168	7.13146
		39.8524	31.2227				134.57	7.19255				520.571	23.5502				778.829	8.01735				618.769	7.12033				618.769	7.12033
		39.8724	31.0033				134.65	7.14141				521.171	23.5768				779.53	8.01735				619.369	7.10949				619.369	7.10949
		39.8924	30.7846				134.73	7.09061				521.772	23.6018				780.23	8.01734				619.97	7.09893				619.97	7.09893
		39.9124	30.5667				134.81	7.04015				522.372	23.6254				780.931	8.01734				620.571	7.08865				620.571	7.08865
		39.9324	30.3498				134.89	6.99002				522.973	23.6475				781.632	8.01734				621.171	7.07864				621.171	7.07864
		39.9524	30.1339				134.97	6.94023				523.574	23.6681				782.332	8.01733				621.772	7.06888				621.772	7.06888
		39.9725	29.919				135	6.92164				524.174	23.6871				783.033	8.01733				622.372	7.05939				622.372	7.05939
		39.9925	29.7052				135.05	6.89077				524.775	23.7046				783.734	8.01733				622.973	7.05015				622.973	7.05015
		40.0125	29.4927				135.13	6.84165				525.375	23.7205				784.434	8.01733				623.574	7.04115				623.574	7.04115
		40.0325	29.2814				135.21	6.79287				525.976	23.7349				785.135	8.01732				624.174	7.0324				624.174	7.0324
		40.0525	29.0714				135.29	6.74442				526.577	23.7477				785.836	8.01732				624.775	7.02387				624.775	7.02387
		40.0726	28.8628				135.37	6.6963				527.177	23.759				786.537	8.01732				625.375	7.01558				625.375	7.01558
		40.0926	28.6557				135.45	6.64853				527.778	23.7687				787.237	8.01732				625.976	7.00751				625.976	7.00751
		40.1126	28.45				135.531	6.60108				528.378	23.7768				787.938	8.01732				626.577	6.99966				626.577	6.99966
		40.1326	28.2459				135.611	6.55397				528.979	23.7834				788.639	8.01731				627.177	6.99203				627.177	6.99203
		40.1527	28.0434				135.691	6.50719				529.58	23.7884				789.339	8.01731				627.778	6.9846				627.778	6.9846
		40.1727	27.8426				135.771	6.46075				530.18	23.7918				790.04	8.01731				628.378	6.97738				628.378	6.97738
		40.1927	27.6435				135.851	6.41464				530.781	23.7936				790.741	8.01731				628.979	6.97035				628.979	6.97035
		40.2127	27.4461				135.931	6.36886				531.381	23.7938				791.441	8.01731				629.58	6.96352				629.58	6.96352
		40.2327	27.2506				136.011	6.32342				531.982	23.7924				792.142	8.01731				630.18	6.95688				630.18	6.95688
		40.2527	27.0568				136.091	6.2783				532.583	23.7895				792.843	8.01731				630.781	6.95042				630.781	6.95042
		40.2728	26.865				136.171	6.23352				533.183	23.785				793.544	8.0173				631.381	6.94415				631.381	6.94415
		40.2928	26.6751				136.251	6.18906				533.784	23.7789				794.244	8.0173				631.982	6.93805				631.982	6.93805
		40.3128	26.4872				136.331	6.14494				534.384	23.7712				794.945	8.0173				632.583	6.93212				632.583	6.93212
		40.3328	26.3012				136.411	6.10114				534.985	23.762				795.646	8.0173				633.183	6.92636				633.183	6.92636
		40.3528	26.1173				136.491	6.05768				535.586	23.7512				796.346	8.0173				633.784	6.92076				633.784	6.92076
		40.3729	25.9355				136.572	6.01454				536.186	23.7388				797.047	8.0173				634.384	6.91532				634.384	6.91532
		40.3929	25.7558				136.652	5.97173				536.787	23.7249				797.748	8.0173				634.985	6.91004				634.985	6.91004
		40.4129	25.5782				136.732	5.92924				537.387	23.7094				798.448	8.0173				635.586	6.90491				635.586	6.90491
		40.4329	25.4027				136.812	5.88708				537.988	23.6924				799.149	8.0173				636.186	6.89992				636.186	6.89992
		40.453	25.2294				136.892	5.84524				538.589	23.6738				799.85	8.0173				636.787	6.89508				636.787	6.89508
		40.473	25.0583				136.972	5.80373				539.189	23.6537				800.551	8.0173				637.387	6.89038				637.387	6.89038
		40.493	24.8894				137.052	5.76254				539.79	23.632				801.251	8.01729				637.988	6.88582				637.988	6.88582
		40.513	24.7228				137.132	5.72167				540.39	23.6089				801.952	8.01729				638.589	6.88139				638.589	6.88139
		40.533	24.5584				137.212	5.68113				540.991	23.5842				802.653	8.01729				639.189	6.87709				639.189	6.87709
		40.553	24.3963				137.292	5.6409				541.592	23.5581				803.353	8.01729				639.79	6.87292				639.79	6.87292
		40.5731	24.2365				137.372	5.601				542.192	23.5304				804.054	8.01729				640.39	6.86886				640.39	6.86886
		40.5931	24.0789				137.452	5.56141				542.793	23.5013				804.755	8.01729				640.991	6.86493				640.991	6.86493
		40.6131	23.9237				137.533	5.52214				543.393	23.4707				805.455	8.01729				641.592	6.86112				641.592	6.86112
		40.6331	23.7708				137.613	5.48319				543.994	23.4387				806.156	8.01729				642.192	6.85742				642.192	6.85742
		40.6531	23.6202				137.693	5.44455				544.595	23.4052				806.857	8.01729				642.793	6.85382				642.793	6.85382
		40.6732	23.4719				137.773	5.40623				545.195	23.3703				807.558	8.01729				643.393	6.85034				643.393	6.85034
		40.6932	23.326				137.853	5.36822				545.796	23.334				808.258	8.01729				643.994	6.84696				643.994	6.84696
		40.7132	23.1823				137.933	5.33052				546.396	23.2963				808.959	8.01729				644.595	6.84369				644.595	6.84369
		40.7332	23.0411				138.013	5.29314				546.997	23.2572				809.66	8.01729				645.195	6.84051				645.195	6.84051
		40.7533	22.9021				138.093	5.25606				547.598	23.2168				810.36	8.01729				645.796	6.83743				645.796	6.83743
		40.7733	22.7655				138.173	5.2193				548.198	23.175				811.061	8.01729				646.396	6.83444				646.396	6.83444
		40.7933	22.6312				138.253	5.18284				548.799	23.1318				811.762	8.01729				646.997	6.83155				646.997	6.83155
		40.8133	22.4993				138.333	5.14669				549.399	23.0874				812.462	8.01729				647.598	6.82874				647.598	6.82874
		40.8333	22.3697				138.413	5.11084				550	23.0416				813.163	8.01729				648.198	6.82602				648.198	6.82602
		40.8533	22.2423				138.493	5.07531				550.601	22.9946				813.864	8.01729				648.799	6.82338				648.799	6.82338
		40.8734	22.1173				138.574	5.04007				551.201	22.9462				814.565	8.01729				649.399	6.82083				649.399	6.82083
		40.8934	21.9946				138.654	5.00514				551.802	22.8967				815.265	8.01729				650	6.81835				650	6.81835
		40.9134	21.8741				138.734	4.9705				552.402	22.8459				815.966	8.01729				650.601	6.81595				650.601	6.81595
		40.9334	21.7559				138.814	4.93617				553.003	22.7939				816.667	8.01729				651.201	6.81363				651.201	6.81363
		40.9534	21.64				138.894	4.90214				553.604	22.7407				817.367	8.01729				651.802	6.81138				651.802	6.81138
		40.9735	21.5264				138.974	4.8684				554.204	22.6864				818.068	8.01729				652.402	6.8092				652.402	6.8092
		40.9935	21.4149				139.054	4.83496				554.805	22.6309				818.769	8.01729				653.003	6.80709				653.003	6.80709
		41.0135	21.3057				139.134	4.80182				555.405	22.5743				819.469	8.01729				653.604	6.80505				653.604	6.80505
		41.0335	21.1987				139.214	4.76897				556.006	22.5166				820.17	8.01729				654.204	6.80307				654.204	6.80307
		41.0536	21.0938				139.294	4.73641				556.607	22.4578				820.871	8.01729				654.805	6.80115				654.805	6.80115
		41.0736	20.9912				139.374	4.70414				557.207	22.3979				821.572	8.01729				655.405	6.7993				655.405	6.7993
		41.0936	20.8906				139.454	4.67216				557.808	22.337				822.272	8.01729				656.006	6.7975				656.006	6.7975
		41.1136	20.7922				139.535	4.64047				558.408	22.2751				822.973	8.01729				656.607	6.79577				656.607	6.79577
		41.1336	20.6959				139.615	4.60907				559.009	22.2122				823.674	8.01729				657.207	6.79409				657.207	6.79409
		41.1536	20.6017				139.695	4.57795				559.61	22.1483				824.374	8.01729				657.808	6.79246				657.808	6.79246
		41.1737	20.5095				139.775	4.54711				560.21	22.0835				825.075	8.01729				658.408	6.79089				658.408	6.79089
		41.1937	20.4194				139.855	4.51656				560.811	22.0177				825.776	8.01729				659.009	6.78936				659.009	6.78936
		41.2137	20.3313				139.935	4.48629				561.411	21.9511				826.476	8.01729				659.61	6.78789				659.61	6.78789
		41.2337	20.2452				140.015	4.4563				562.012	21.8836				827.177	8.01729				660.21	6.78647				660.21	6.78647
		41.2537	20.161				140.095	4.42659				562.613	21.8152				827.878	8.01729				660.811	6.78509				660.811	6.78509
		41.2738	20.0788				140.175	4.39716				563.213	21.746				828.579	8.01729				661.411	6.78376				661.411	6.78376
		41.2938	19.9985				140.255	4.368				563.814	21.676				829.279	8.01729				662.012	6.78247				662.012	6.78247
		41.3138	19.9201				140.335	4.33912				564.414	21.6053				829.98	8.01729				662.613	6.78122				662.613	6.78122
		41.3338	19.8436				140.415	4.3105				565.015	21.5337				830.681	8.01729				663.213	6.78002				663.213	6.78002
		41.3539	19.7689				140.495	4.28216				565.616	21.4615				831.381	8.01729				663.814	6.77886				663.814	6.77886
		41.3739	19.6961				140.576	4.25409				566.216	21.3885				832.082	8.01729				664.414	6.77773				664.414	6.77773
		41.3939	19.625				140.656	4.22629				566.817	21.3149				832.783	8.01729				665.015	6.77665				665.015	6.77665
		41.4139	19.5557				140.736	4.19875				567.417	21.2406				833.483	8.01729				665.616	6.7756				665.616	6.7756
		41.4339	19.4881				140.816	4.17148				568.018	21.1657				834.184	8.01729				666.216	6.77458				666.216	6.77458
		41.4539	19.4222				140.896	4.14448				568.619	21.0902				834.885	8.01729				666.817	6.7736				666.817	6.7736
		41.474	19.358				140.976	4.11773				569.219	21.0141				835.586	8.01729				667.417	6.77265				667.417	6.77265
		41.494	19.2954				141.056	4.09125				569.82	20.9375				836.286	8.01729				668.018	6.77174				668.018	6.77174
		41.514	19.2345				141.136	4.06502				570.42	20.8604				836.987	8.01729				668.619	6.77086				668.619	6.77086
		41.534	19.1752				141.216	4.03906				571.021	20.7827				837.688	8.01729				669.219	6.77				669.219	6.77
		41.554	19.1174				141.296	4.01335				571.622	20.7046				838.388	8.01729				669.82	6.76918				669.82	6.76918
		41.5741	19.0612				141.376	3.98789				572.222	20.626				839.089	8.01729				670.42	6.76838				670.42	6.76838
		41.5941	19.0065				141.456	3.96269				572.823	20.547				839.79	8.01729				671.021	6.76761				671.021	6.76761
		41.6141	18.9533				141.537	3.93774				573.423	20.4676				840.49	8.01729				671.622	6.76687				671.622	6.76687
		41.6341	18.9015				141.617	3.91304				574.024	20.3878				841.191	8.01729				672.222	6.76616				672.222	6.76616
		41.6542	18.8512				141.697	3.88858				574.625	20.3077				841.892	8.01729				672.823	6.76547				672.823	6.76547
		41.6742	18.8022				141.777	3.86438				575.225	20.2273				842.593	8.01729				673.423	6.7648				673.423	6.7648
		41.6942	18.7547				141.857	3.84041				575.826	20.1465				843.293	8.01729				674.024	6.76416				674.024	6.76416
		41.7142	18.7085				141.937	3.8167				576.426	20.0655				843.994	8.01729				674.625	6.76354				674.625	6.76354
		41.7342	18.6636				142.017	3.79322				577.027	19.9843				844.695	8.01729				675.225	6.76294				675.225	6.76294
		41.7542	18.6199				142.097	3.76999				577.628	19.9028				845.395	8.01729				675.826	6.76236				675.826	6.76236
		41.7743	18.5776				142.177	3.74699				578.228	19.8211				846.096	8.01729				676.426	6.7618				676.426	6.7618
		41.7943	18.5365				142.257	3.72423				578.829	19.7393				846.797	8.01729				677.027	6.76127				677.027	6.76127
		41.8143	18.4966				142.337	3.70171				579.429	19.6573				847.497	8.01729				677.628	6.76075				677.628	6.76075
		41.8343	18.4579				142.417	3.67942				580.03	19.5751				848.198	8.01729				678.228	6.76025				678.228	6.76025
		41.8543	18.4203				142.498	3.65736				580.631	19.4929				848.899	8.01729				678.829	6.75977				678.829	6.75977
		41.8744	18.3839				142.578	3.63554				581.231	19.4106				849.6	8.01729				679.429	6.7593				679.429	6.7593
		41.8944	18.3486				142.658	3.61394				581.832	19.3282				850	8.01729				680.03	6.75886				680.03	6.75886
		41.9144	18.3144				142.738	3.59257				582.432	19.2458				850.3	8.01729				680.631	6.75842				680.631	6.75842
		41.9344	18.2812				142.818	3.57143				583.033	19.1634				851.001	8.01729				681.231	6.75801				681.231	6.75801
		41.9545	18.249				142.898	3.55051				583.634	19.081				851.702	8.01729				681.832	6.75761				681.832	6.75761
		41.9745	18.2179				142.978	3.52982				584.234	18.9986				852.402	8.01729				682.432	6.75722				682.432	6.75722
		41.9945	18.1877				143.058	3.50935				584.835	18.9162				853.103	8.01729				683.033	6.75685				683.033	6.75685
		42.0145	18.1585				143.138	3.48909				585.435	18.834				853.804	8.01729				683.634	6.75649				683.634	6.75649
		42.0345	18.1302				143.218	3.46906				586.036	18.7518				854.505	8.01729				684.234	6.75615				684.234	6.75615
		42.0545	18.1028				143.298	3.44924				586.637	18.6698				855.205	8.01729				684.835	6.75581				684.835	6.75581
		42.0746	18.0764				143.378	3.42964				587.237	18.5879				855.906	8.01729				685.435	6.75549				685.435	6.75549
		42.0946	18.0507				143.458	3.41024				587.838	18.5062				856.607	8.01729				686.036	6.75519				686.036	6.75519
		42.1146	18.026				143.539	3.39107				588.438	18.4246				857.307	8.01729				686.637	6.75489				686.637	6.75489
		42.1346	18.002				143.619	3.3721				589.039	18.3432				858.008	8.01729				687.237	6.7546				687.237	6.7546
		42.1546	17.9788				143.699	3.35334				589.64	18.2621				858.709	8.01729				687.838	6.75433				687.838	6.75433
		42.1747	17.9564				143.779	3.33479				590.24	18.1812				859.409	8.01729				688.438	6.75406				688.438	6.75406
		42.1947	17.9348				143.859	3.31644				590.841	18.1005				860.11	8.01729				689.039	6.75381				689.039	6.75381
		42.2147	17.9139				143.939	3.29829				591.441	18.0202				860.811	8.01729				689.64	6.75356				689.64	6.75356
		42.2347	17.8937				144.019	3.28035				592.042	17.9401				861.512	8.01729				690.24	6.75333				690.24	6.75333
		42.2548	17.8742				144.099	3.26261				592.643	17.8603				862.212	8.01729				690.841	6.7531				690.841	6.7531
		42.2748	17.8554				144.179	3.24507				593.243	17.7808				862.913	8.01729				691.441	6.75288				691.441	6.75288
		42.2948	17.8373				144.259	3.22773				593.844	17.7017				863.614	8.01729				692.042	6.75267				692.042	6.75267
		42.3148	17.8197				144.339	3.21058				594.444	17.623				864.314	8.01729				692.643	6.75247				692.643	6.75247
		42.3348	17.8028				144.419	3.19362				595.045	17.5446				865.015	8.01729				693.243	6.75228				693.243	6.75228
		42.3548	17.7865				144.5	3.17686				595.646	17.4666				865.716	8.01729				693.844	6.75209				693.844	6.75209
		42.3749	17.7708				144.58	3.16029				596.246	17.3891				866.416	8.01729				694.444	6.75191				694.444	6.75191
		42.3949	17.7556				144.66	3.14391				596.847	17.3119				867.117	8.01729				695.045	6.75174				695.045	6.75174
		42.4149	17.741				144.74	3.12772				597.447	17.2352				867.818	8.01729				695.646	6.75157				695.646	6.75157
		42.4349	17.7269				144.82	3.11171				598.048	17.1589				868.519	8.01729				696.246	6.75141				696.246	6.75141
		42.4549	17.7134				144.9	3.09589				598.649	17.0831				869.219	8.01729				696.847	6.75126				696.847	6.75126
		42.475	17.7003				144.98	3.08025				599.249	17.0078				869.92	8.01729				697.447	6.75111				697.447	6.75111
		42.495	17.6877				145	3.07637				599.85	16.933				870.621	8.01729				698.048	6.75097				698.048	6.75097
		42.5	17.6847				145.06	3.0648				600.45	16.8587				871.321	8.01729				698.649	6.75083				698.649	6.75083
		42.515	17.6756				145.14	3.04952				601.051	16.7848				872.022	8.01729				699.249	6.7507				699.249	6.7507
		42.535	17.6639				145.22	3.03442				601.652	16.7115				872.723	8.01729				699.85	6.75057				699.85	6.75057
		42.5551	17.6527				145.3	3.0195				602.252	16.6388				873.423	8.01729				700.45	6.75045				700.45	6.75045
		42.5751	17.6419				145.38	3.00476				602.853	16.5666				874.124	8.01729				701.051	6.75034				701.051	6.75034
		42.5951	17.6316				145.46	2.99019				603.453	16.495				874.825	8.01729				701.652	6.75023				701.652	6.75023
		42.6151	17.6216				145.541	2.97579				604.054	16.4239				875.526	8.01729				702.252	6.75012				702.252	6.75012
		42.6351	17.612				145.621	2.96157				604.655	16.3534				876.226	8.01729				702.853	6.75002				702.853	6.75002
		42.6552	17.6027				145.701	2.94751				605.255	16.2836				876.927	8.01729				703.453	6.74992				703.453	6.74992
		42.6752	17.5939				145.781	2.93362				605.856	16.2142				877.628	8.01729				704.054	6.74982				704.054	6.74982
		42.6952	17.5853				145.861	2.9199				606.456	16.1456				878.328	8.01729				704.655	6.74973				704.655	6.74973
		42.7152	17.5771				145.941	2.90634				607.057	16.0775				879.029	8.01729				705.255	6.74964				705.255	6.74964
		42.7352	17.5693				146.021	2.89295				607.658	16.0101				879.73	8.01729				705.856	6.74956				705.856	6.74956
		42.7553	17.5617				146.101	2.87972				608.258	15.9432				880.43	8.01729				706.456	6.74948				706.456	6.74948
		42.7753	17.5545				146.181	2.86664				608.859	15.8771				881.131	8.01729				707.057	6.7494				707.057	6.7494
		42.7953	17.5475				146.261	2.85373				609.459	15.8115				881.832	8.01729				707.658	6.74933				707.658	6.74933
		42.8153	17.5408				146.341	2.84098				610.06	15.7467				882.533	8.01729				708.258	6.74926				708.258	6.74926
		42.8353	17.5344				146.421	2.82838				610.661	15.6824				883.233	8.01729				708.859	6.74919				708.859	6.74919
		42.8554	17.5283				146.501	2.81594				611.261	15.6189				883.934	8.01729				709.459	6.74912				709.459	6.74912
		42.8754	17.5224				146.582	2.80365				611.862	15.556				884.635	8.01729				710.06	6.74906				710.06	6.74906
		42.8954	17.5168				146.662	2.79151				612.462	15.4938				885.335	8.01729				710.661	6.749				710.661	6.749
		42.9154	17.5114				146.742	2.77952				613.063	15.4322				886.036	8.01729				711.261	6.74894				711.261	6.74894
		42.9354	17.5062				146.822	2.76768				613.664	15.3714				886.737	8.01729				711.862	6.74889				711.862	6.74889
		42.9555	17.5012				146.902	2.75599				614.264	15.3112				887.437	8.01729				712.462	6.74883				712.462	6.74883
		42.9755	17.4964				146.982	2.74445				614.865	15.2517				888.138	8.01729				713.063	6.74878				713.063	6.74878
		42.9955	17.4919				147.062	2.73305				615.465	15.193				888.839	8.01729				713.664	6.74874				713.664	6.74874
		43.0155	17.4875				147.142	2.72179				616.066	15.1349				889.54	8.01729				714.264	6.74869				714.264	6.74869
		43.0355	17.4834				147.222	2.71068				616.667	15.0775				890.24	8.01729				714.865	6.74864				714.865	6.74864
		43.0556	17.4794				147.302	2.6997				617.267	15.0208				890.941	8.01729				715.465	6.7486				715.465	6.7486
		43.0756	17.4755				147.382	2.68887				617.868	14.9648				891.642	8.01729				716.066	6.74856				716.066	6.74856
		43.0956	17.4719				147.462	2.67817				618.468	14.9095				892.342	8.01729				716.667	6.74852				716.667	6.74852
		43.1156	17.4684				147.543	2.66761				619.069	14.8549				893.043	8.01729				717.267	6.74848				717.267	6.74848
		43.1356	17.465				147.623	2.65719				619.67	14.801				893.744	8.01729				717.868	6.74845				717.868	6.74845
		43.1557	17.4618				147.703	2.6469				620.27	14.7478				894.444	8.01729				718.468	6.74841				718.468	6.74841
		43.1757	17.4588				147.783	2.63674				620.871	14.6954				895.145	8.01729				719.069	6.74838				719.069	6.74838
		43.1957	17.4559				147.863	2.62671				621.471	14.6436				895.846	8.01729				719.67	6.74835				719.67	6.74835
		43.2157	17.4531				147.943	2.61681				622.072	14.5926				896.547	8.01729				720.27	6.74832				720.27	6.74832
		43.2357	17.4504				148.023	2.60704				622.673	14.5422				897.247	8.01729				720.871	6.74829				720.871	6.74829
		43.2558	17.4478				148.103	2.5974				623.273	14.4926				897.948	8.01729				721.471	6.74826				721.471	6.74826
		43.2758	17.4454				148.183	2.58788				623.874	14.4436				898.649	8.01729				722.072	6.74823				722.072	6.74823
		43.2958	17.4431				148.263	2.57849				624.474	14.3954				899.349	8.01729				722.673	6.74821				722.673	6.74821
		43.3158	17.4409				148.343	2.56922				625.075	14.3478				900.05	8.01729				723.273	6.74818				723.273	6.74818
		43.3358	17.4388				148.423	2.56007				625.676	14.301				900.751	8.01729				723.874	6.74816				723.874	6.74816
		43.3559	17.4368				148.504	2.55104				626.276	14.2548				901.451	8.01729				724.474	6.74814				724.474	6.74814
		43.3759	17.4349				148.584	2.54214				626.877	14.2094				902.152	8.01729				725.075	6.74812				725.075	6.74812
		43.3959	17.433				148.664	2.53335				627.477	14.1646				902.853	8.01729				725.676	6.7481				725.676	6.7481
		43.4159	17.4313				148.744	2.52467				628.078	14.1205				903.554	8.01729				726.276	6.74808				726.276	6.74808
		43.4359	17.4296				148.824	2.51612				628.679	14.0771				904.254	8.01729				726.877	6.74806				726.877	6.74806
		43.456	17.428				148.904	2.50767				629.279	14.0344				904.955	8.01729				727.477	6.74804				727.477	6.74804
		43.476	17.4265				148.984	2.49934				629.88	13.9924				905.656	8.01729				728.078	6.74802				728.078	6.74802
		43.496	17.4251				149.064	2.49113				630.48	13.9511				906.356	8.01729				728.679	6.74801				728.679	6.74801
		43.516	17.4237				149.144	2.48302				631.081	13.9104				907.057	8.01729				729.279	6.74799				729.279	6.74799
		43.536	17.4224				149.224	2.47502				631.682	13.8704				907.758	8.01729				729.88	6.74798				729.88	6.74798
		43.5561	17.4212				149.304	2.46713				632.282	13.831				908.458	8.01729				730.48	6.74796				730.48	6.74796
		43.5761	17.42				149.384	2.45935				632.883	13.7923				909.159	8.01729				731.081	6.74795				731.081	6.74795
		43.5961	17.4189				149.464	2.45168				633.483	13.7543				909.86	8.01729				731.682	6.74794				731.682	6.74794
		43.6161	17.4178				149.545	2.44411				634.084	13.7169				910.561	8.01729				732.282	6.74792				732.282	6.74792
		43.6361	17.4168				149.625	2.43664				634.685	13.6801				911.261	8.01729				732.883	6.74791				732.883	6.74791
		43.6562	17.4158				149.705	2.42927				635.285	13.644				911.962	8.01729				733.483	6.7479				733.483	6.7479
		43.6762	17.4149				149.785	2.42201				635.886	13.6085				912.663	8.01729				734.084	6.74789				734.084	6.74789
		43.6962	17.414				149.865	2.41485				636.486	13.5737				913.363	8.01729				734.685	6.74788				734.685	6.74788
		43.7162	17.4132				149.945	2.40778				637.087	13.5395				914.064	8.01729				735.285	6.74787				735.285	6.74787
		43.7362	17.4124				150.025	2.40082				637.688	13.5059				914.765	8.01729				735.886	6.74786				735.886	6.74786
		43.7563	17.4117				150.105	2.39395				638.288	13.4729				915.465	8.01729				736.486	6.74785				736.486	6.74785
		43.7763	17.4109				150.185	2.38717				638.889	13.4405				916.166	8.01729				737.087	6.74784				737.087	6.74784
		43.7963	17.4103				150.265	2.3805				639.489	13.4087				916.867	8.01729				737.688	6.74783				737.688	6.74783
		43.8163	17.4096				150.345	2.37391				640.09	13.3775				917.568	8.01729				738.288	6.74783				738.288	6.74783
		43.8363	17.409				150.425	2.36742				640.691	13.3469				918.268	8.01729				738.889	6.74782				738.889	6.74782
		43.8564	17.4084				150.506	2.36102				641.291	13.3169				918.969	8.01729				739.489	6.74781				739.489	6.74781
		43.8764	17.4079				150.586	2.3547				641.892	13.2875				919.67	8.01729				740.09	6.7478				740.09	6.7478
		43.8964	17.4074				150.666	2.34848				642.492	13.2586				920.37	8.01729				740.691	6.7478				740.691	6.7478
		43.9164	17.4069				150.746	2.34235				643.093	13.2303				921.071	8.01729				741.291	6.74779				741.291	6.74779
		43.9364	17.4064				150.826	2.3363				643.694	13.2026				921.772	8.01729				741.892	6.74779				741.892	6.74779
		43.9565	17.406				150.906	2.33034				644.294	13.1754				922.472	8.01729				742.492	6.74778				742.492	6.74778
		43.9765	17.4056				150.986	2.32447				644.895	13.1487				923.173	8.01729				743.093	6.74777				743.093	6.74777
		43.9965	17.4052				151.066	2.31868				645.495	13.1226				923.874	8.01729				743.694	6.74777				743.694	6.74777
		44.0165	17.4048				151.146	2.31297				646.096	13.097				924.575	8.01729				744.294	6.74776				744.294	6.74776
		44.0365	17.4045				151.226	2.30734				646.697	13.0719				925.275	8.01729				744.895	6.74776				744.895	6.74776
		44.0566	17.4041				151.306	2.3018				647.297	13.0474				925.976	8.01729				745.495	6.74776				745.495	6.74776
		44.0766	17.4038				151.386	2.29634				647.898	13.0234				926.677	8.01729				746.096	6.74775				746.096	6.74775
		44.0966	17.4035				151.466	2.29095				648.499	12.9999				927.377	8.01729				746.697	6.74775				746.697	6.74775
		44.1166	17.4032				151.547	2.28564				649.099	12.9768				928.078	8.01729				747.297	6.74774				747.297	6.74774
		44.1366	17.4029				151.627	2.28042				649.7	12.9543				928.779	8.01729				747.898	6.74774				747.898	6.74774
		44.1567	17.4027				151.707	2.27526				650	12.9432				929.479	8.01729				748.499	6.74774				748.499	6.74774
		44.1767	17.4025				151.787	2.27019				650.3	12.9322				930.18	8.01729				749.099	6.74773				749.099	6.74773
		44.1967	17.4022				151.867	2.26518				650.901	12.9107				930.881	8.01729				749.7	6.74773				749.7	6.74773
		44.2167	17.402				151.947	2.26025				651.501	12.8895				931.582	8.01729				750	6.74773				750	6.74773
		44.2367	17.4018				152.027	2.2554				652.102	12.8689				932.282	8.01729				750.3	6.74773				750.3	6.74773
		44.2568	17.4016				152.107	2.25061				652.703	12.8487				932.983	8.01729				750.901	6.74772				750.901	6.74772
		44.2768	17.4014				152.187	2.2459				653.303	12.829				933.684	8.01729				751.501	6.74772				751.501	6.74772
		44.2968	17.4013				152.267	2.24126				653.904	12.8096				934.384	8.01729				752.102	6.74772				752.102	6.74772
		44.3168	17.4011				152.347	2.23668				654.505	12.7908				935.085	8.01729				752.703	6.74772				752.703	6.74772
		44.3368	17.4009				152.427	2.23218				655.105	12.7723				935.786	8.01729				753.303	6.74771				753.303	6.74771
		44.3569	17.4008				152.508	2.22774				655.706	12.7543				936.486	8.01729				753.904	6.74771				753.904	6.74771
		44.3769	17.4007				152.588	2.22336				656.306	12.7367				937.187	8.01729				754.505	6.74771				754.505	6.74771
		44.3969	17.4005				152.668	2.21906				656.907	12.7195				937.888	8.01729				755.105	6.74771				755.105	6.74771
		44.4169	17.4004				152.748	2.21482				657.508	12.7027				938.589	8.01729				755.706	6.74771				755.706	6.74771
		44.4369	17.4003				152.828	2.21064				658.108	12.6863				939.289	8.01729				756.306	6.7477				756.306	6.7477
		44.457	17.4002				152.908	2.20652				658.709	12.6703				939.99	8.01729				756.907	6.7477				756.907	6.7477
		44.477	17.4001				152.988	2.20247				659.309	12.6547				940.691	8.01729				757.508	6.7477				757.508	6.7477
		44.497	17.4				153.068	2.19848				659.91	12.6395				941.391	8.01729				758.108	6.7477				758.108	6.7477
		44.517	17.3999				153.148	2.19455				660.511	12.6246				942.092	8.01729				758.709	6.7477				758.709	6.7477
		44.537	17.3998				153.228	2.19068				661.111	12.61				942.793	8.01729				759.309	6.7477				759.309	6.7477
		44.5571	17.3998				153.308	2.18687				661.712	12.5959				943.493	8.01729				759.91	6.74769				759.91	6.74769
		44.5771	17.3997				153.388	2.18312				662.312	12.582				944.194	8.01729				760.511	6.74769				760.511	6.74769
		44.5971	17.3996				153.468	2.17943				662.913	12.5686				944.895	8.01729				761.111	6.74769				761.111	6.74769
		44.6171	17.3995				153.549	2.17579				663.514	12.5554				945.596	8.01729				761.712	6.74769				761.712	6.74769
		44.6371	17.3995				153.629	2.17221				664.114	12.5426				946.296	8.01729				762.312	6.74769				762.312	6.74769
		44.6572	17.3994				153.709	2.16868				664.715	12.5301				946.997	8.01729				762.913	6.74769				762.913	6.74769
		44.6772	17.3994				153.789	2.16521				665.315	12.5179				947.698	8.01729				763.514	6.74769				763.514	6.74769
		44.6972	17.3993				153.869	2.1618				665.916	12.506				948.398	8.01729				764.114	6.74769				764.114	6.74769
		44.7172	17.3993				153.949	2.15843				666.517	12.4945				949.099	8.01729				764.715	6.74769				764.715	6.74769
		44.7372	17.3992				154.029	2.15512				667.117	12.4832				949.8	8.01729				765.315	6.74768				765.315	6.74768
		44.7573	17.3992				154.109	2.15186				667.718	12.4722				950	8.01729				765.916	6.74768				765.916	6.74768
		44.7773	17.3991				154.189	2.14866				668.318	12.4615				950.5	8.01729				766.517	6.74768				766.517	6.74768
		44.7973	17.3991				154.269	2.1455				668.919	12.4511				951.201	8.01729				767.117	6.74768				767.117	6.74768
		44.8173	17.399				154.349	2.14239				669.52	12.441				951.902	8.01729				767.718	6.74768				767.718	6.74768
		44.8373	17.399				154.429	2.13933				670.12	12.4311				952.603	8.01729				768.318	6.74768				768.318	6.74768
		44.8574	17.399				154.51	2.13632				670.721	12.4215				953.303	8.01729				768.919	6.74768				768.919	6.74768
		44.8774	17.399				154.59	2.13336				671.321	12.4122				954.004	8.01729				769.52	6.74768				769.52	6.74768
		44.8974	17.3989				154.67	2.13044				671.922	12.4031				954.705	8.01729				770.12	6.74768				770.12	6.74768
		44.9174	17.3989				154.75	2.12757				672.523	12.3942				955.405	8.01729				770.721	6.74768				770.721	6.74768
		44.9374	17.3989				154.83	2.12475				673.123	12.3856				956.106	8.01729				771.321	6.74768				771.321	6.74768
		44.9575	17.3989				154.91	2.12197				673.724	12.3772				956.807	8.01729				771.922	6.74768				771.922	6.74768
		44.9775	17.3988				154.99	2.11924				674.324	12.3691				957.508	8.01729				772.523	6.74768				772.523	6.74768
		44.9975	17.3988				155	2.1189				674.925	12.3612				958.208	8.01729				773.123	6.74768				773.123	6.74768
		45.0175	17.3988				155.07	2.11655				675.526	12.3535				958.909	8.01729				773.724	6.74768				773.724	6.74768
		45.0375	17.3988				155.15	2.11391				676.126	12.346				959.61	8.01729				774.324	6.74768				774.324	6.74768
		45.0576	17.3988				155.23	2.1113				676.727	12.3387				960.31	8.01729				774.925	6.74767				774.925	6.74767
		45.0776	17.3987				155.31	2.10874				677.327	12.3317				961.011	8.01729				775.526	6.74767				775.526	6.74767
		45.0976	17.3987				155.39	2.10622				677.928	12.3248				961.712	8.01729				776.126	6.74767				776.126	6.74767
		45.1176	17.3987				155.47	2.10374				678.529	12.3182				962.412	8.01729				776.727	6.74767				776.727	6.74767
		45.1376	17.3987				155.551	2.1013				679.129	12.3117				963.113	8.01729				777.327	6.74767				777.327	6.74767
		45.1577	17.3987				155.631	2.09891				679.73	12.3054				963.814	8.01729				777.928	6.74767				777.928	6.74767
		45.1777	17.3987				155.711	2.09655				680.33	12.2993				964.515	8.01729				778.529	6.74767				778.529	6.74767
		45.1977	17.3987				155.791	2.09423				680.931	12.2934				965.215	8.01729				779.129	6.74767				779.129	6.74767
		45.2177	17.3987				155.871	2.09194				681.532	12.2876				965.916	8.01729				779.73	6.74767				779.73	6.74767
		45.2377	17.3987				155.951	2.0897				682.132	12.282				966.617	8.01729				780.33	6.74767				780.33	6.74767
		45.2578	17.3986				156.031	2.08749				682.733	12.2766				967.317	8.01729				780.931	6.74767				780.931	6.74767
		45.2778	17.3986				156.111	2.08532				683.333	12.2714				968.018	8.01729				781.532	6.74767				781.532	6.74767
		45.2978	17.3986				156.191	2.08318				683.934	12.2663				968.719	8.01729				782.132	6.74767				782.132	6.74767
		45.3178	17.3986				156.271	2.08108				684.535	12.2613				969.419	8.01729				782.733	6.74767				782.733	6.74767
		45.3378	17.3986				156.351	2.07902				685.135	12.2565				970.12	8.01729				783.333	6.74767				783.333	6.74767
		45.3579	17.3986				156.431	2.07699				685.736	12.2519				970.821	8.01729				783.934	6.74767				783.934	6.74767
		45.3779	17.3986				156.512	2.07499				686.336	12.2474				971.522	8.01729				784.535	6.74767				784.535	6.74767
		45.3979	17.3986				156.592	2.07303				686.937	12.243				972.222	8.01729				785.135	6.74767				785.135	6.74767
		45.4179	17.3986				156.672	2.0711				687.538	12.2388				972.923	8.01729				785.736	6.74767				785.736	6.74767
		45.4379	17.3986				156.752	2.0692				688.138	12.2347				973.624	8.01729				786.336	6.74767				786.336	6.74767
		45.458	17.3986				156.832	2.06733				688.739	12.2307				974.324	8.01729				786.937	6.74767				786.937	6.74767
		45.478	17.3986				156.912	2.0655				689.339	12.2269				975.025	8.01729				787.538	6.74767				787.538	6.74767
		45.498	17.3986				156.992	2.06369				689.94	12.2231				975.726	8.01729				788.138	6.74767				788.138	6.74767
		45.518	17.3986				157.072	2.06192				690.541	12.2195				976.426	8.01729				788.739	6.74767				788.739	6.74767
		45.538	17.3986				157.152	2.06018				691.141	12.216				977.127	8.01729				789.339	6.74767				789.339	6.74767
		45.5581	17.3986				157.232	2.05847				691.742	12.2126				977.828	8.01729				789.94	6.74767				789.94	6.74767
		45.5781	17.3986				157.312	2.05678				692.342	12.2093				978.529	8.01729				790.541	6.74767				790.541	6.74767
		45.5981	17.3986				157.392	2.05513				692.943	12.2062				979.229	8.01729				791.141	6.74767				791.141	6.74767
		45.6181	17.3986				157.472	2.0535				693.544	12.2031				979.93	8.01729				791.742	6.74767				791.742	6.74767
		45.6381	17.3986				157.553	2.0519				694.144	12.2001				980.631	8.01729				792.342	6.74767				792.342	6.74767
		45.6582	17.3986				157.633	2.05033				694.745	12.1973				981.331	8.01729				792.943	6.74767				792.943	6.74767
		45.6782	17.3986				157.713	2.04878				695.345	12.1945				982.032	8.01729				793.544	6.74767				793.544	6.74767
		45.6982	17.3986				157.793	2.04726				695.946	12.1918				982.733	8.01729				794.144	6.74767				794.144	6.74767
		45.7182	17.3986				157.873	2.04577				696.547	12.1892				983.433	8.01729				794.745	6.74767				794.745	6.74767
		45.7382	17.3986				157.953	2.04431				697.147	12.1867				984.134	8.01729				795.345	6.74767				795.345	6.74767
		45.7583	17.3986				158.033	2.04287				697.748	12.1842				984.835	8.01729				795.946	6.74767				795.946	6.74767
		45.7783	17.3986				158.113	2.04145				698.348	12.1819				985.536	8.01729				796.547	6.74767				796.547	6.74767
		45.7983	17.3986				158.193	2.04006				698.949	12.1796				986.236	8.01729				797.147	6.74767				797.147	6.74767
		45.8183	17.3986				158.273	2.03869				699.55	12.1774				986.937	8.01729				797.748	6.74767				797.748	6.74767
		45.8383	17.3986				158.353	2.03735				700.15	12.1753				987.638	8.01729				798.348	6.74767				798.348	6.74767
		45.8584	17.3985				158.433	2.03603				700.751	12.1732				988.338	8.01729				798.949	6.74767				798.949	6.74767
		45.8784	17.3985				158.514	2.03474				701.351	12.1713				989.039	8.01729				799.55	6.74767				799.55	6.74767
		45.8984	17.3985				158.594	2.03346				701.952	12.1693				989.74	8.01729				800.15	6.74767				800.15	6.74767
		45.9184	17.3985				158.674	2.03221				702.553	12.1675				990.44	8.01729				800.751	6.74767				800.751	6.74767
		45.9384	17.3985				158.754	2.03098				703.153	12.1657				991.141	8.01729				801.351	6.74767				801.351	6.74767
		45.9585	17.3985				158.834	2.02978				703.754	12.164				991.842	8.01729				801.952	6.74767				801.952	6.74767
		45.9785	17.3985				158.914	2.02859				704.354	12.1623				992.543	8.01729				802.553	6.74767				802.553	6.74767
		45.9985	17.3985				158.994	2.02743				704.955	12.1608				993.243	8.01729				803.153	6.74767				803.153	6.74767
		46.0185	17.3985				159.074	2.02628				705.556	12.1592				993.944	8.01729				803.754	6.74767				803.754	6.74767
		46.0385	17.3985				159.154	2.02516				706.156	12.1577				994.645	8.01729				804.354	6.74767				804.354	6.74767
		46.0586	17.3985				159.234	2.02406				706.757	12.1563				995.345	8.01729				804.955	6.74767				804.955	6.74767
		46.0786	17.3985				159.314	2.02297				707.357	12.1549				996.046	8.01729				805.556	6.74767				805.556	6.74767
		46.0986	17.3985				159.394	2.02191				707.958	12.1535				996.747	8.01729				806.156	6.74767				806.156	6.74767
		46.1186	17.3985				159.474	2.02086				708.559	12.1523				997.447	8.01729				806.757	6.74767				806.757	6.74767
		46.1386	17.3985				159.555	2.01984				709.159	12.151				998.148	8.01729				807.357	6.74767				807.357	6.74767
		46.1587	17.3985				159.635	2.01883				709.76	12.1498				998.849	8.01729				807.958	6.74767				807.958	6.74767
		46.1787	17.3985				159.715	2.01784				710.36	12.1487				999.55	8.01729				808.559	6.74767				808.559	6.74767
		46.1987	17.3985				159.795	2.01687				710.961	12.1476				1000.25	8.01729				809.159	6.74767				809.159	6.74767
		46.2187	17.3985				159.875	2.01591				711.562	12.1465				1000.95	8.01729				809.76	6.74767				809.76	6.74767
		46.2387	17.3985				159.955	2.01498				712.162	12.1455				1001.65	8.01729				810.36	6.74767				810.36	6.74767
		46.2588	17.3985				160.035	2.01406				712.763	12.1445				1002.35	8.01729				810.961	6.74767				810.961	6.74767
		46.2788	17.3985				160.115	2.01316				713.363	12.1435				1003.05	8.01729				811.562	6.74767				811.562	6.74767
		46.2988	17.3985				160.195	2.01227				713.964	12.1426				1003.75	8.01729				812.162	6.74767				812.162	6.74767
		46.3188	17.3985				160.275	2.0114				714.565	12.1417				1004.45	8.01729				812.763	6.74767				812.763	6.74767
		46.3388	17.3985				160.355	2.01055				715.165	12.1408				1005.16	8.01729				813.363	6.74767				813.363	6.74767
		46.3589	17.3985				160.435	2.00971				715.766	12.14				1005.86	8.01729				813.964	6.74767				813.964	6.74767
		46.3789	17.3985				160.516	2.00888				716.366	12.1392				1007.26	8.01729				814.565	6.74767				814.565	6.74767
		46.3989	17.3985				160.596	2.00808				716.967	12.1385				1007.96	8.01729				815.165	6.74767				815.165	6.74767
		46.4189	17.3985				160.676	2.00728				717.568	12.1377				1008.66	8.01729				815.766	6.74767				815.766	6.74767
		46.4389	17.3985				160.756	2.0065				718.168	12.137				1009.36	8.01729				816.366	6.74767				816.366	6.74767
		46.459	17.3985				160.836	2.00574				718.769	12.1363				1010.06	8.01729				816.967	6.74767				816.967	6.74767
		46.479	17.3985				160.916	2.00499				719.369	12.1357				1010.76	8.01729				817.568	6.74767				817.568	6.74767
		46.499	17.3985				160.996	2.00426				719.97	12.1351				1011.46	8.01729				818.168	6.74767				818.168	6.74767
		46.519	17.3985				161.076	2.00353				720.571	12.1345				1012.16	8.01729				818.769	6.74767				818.769	6.74767
		46.539	17.3985				161.156	2.00283				721.171	12.1339				1012.86	8.01729				819.369	6.74767				819.369	6.74767
		46.5591	17.3985				161.236	2.00213				721.772	12.1333				1013.56	8.01729				819.97	6.74767				819.97	6.74767
		46.5791	17.3985				161.316	2.00145				722.372	12.1328				1014.26	8.01729				820.571	6.74767				820.571	6.74767
		46.5991	17.3985				161.396	2.00078				722.973	12.1323				1014.96	8.01729				821.171	6.74767				821.171	6.74767
		46.6191	17.3985				161.476	2.00012				723.574	12.1318				1015.67	8.01729				821.772	6.74767				821.772	6.74767
		46.6391	17.3985				161.557	1.99948				724.174	12.1313				1016.37	8.01729				822.372	6.74767				822.372	6.74767
		46.6592	17.3985				161.637	1.99884				724.775	12.1309				1017.07	8.01729				822.973	6.74767				822.973	6.74767
		46.6792	17.3985				161.717	1.99822				725.375	12.1304				1017.77	8.01729				823.574	6.74767				823.574	6.74767
		46.6992	17.3985				161.797	1.99762				725.976	12.13				1018.47	8.01729				824.174	6.74767				824.174	6.74767
		46.7192	17.3985				161.877	1.99702				726.577	12.1296				1019.17	8.01729				824.775	6.74767				824.775	6.74767
		46.7392	17.3985				161.957	1.99643				727.177	12.1292				1019.87	8.01729				825.375	6.74767				825.375	6.74767
		46.7593	17.3985				162.037	1.99586				727.778	12.1288				1020.57	8.01729				825.976	6.74767				825.976	6.74767
		46.7793	17.3985				162.117	1.9953				728.378	12.1285				1021.27	8.01729				826.577	6.74767				826.577	6.74767
		46.7993	17.3985				162.197	1.99474				728.979	12.1281				1021.97	8.01729				827.177	6.74767				827.177	6.74767
		46.8193	17.3985				162.277	1.9942				729.58	12.1278				1022.67	8.01729				827.778	6.74767				827.778	6.74767
		46.8393	17.3985				162.357	1.99367				730.18	12.1275				1023.37	8.01729				828.378	6.74767				828.378	6.74767
		46.8594	17.3985				162.437	1.99315				730.781	12.1272				1024.07	8.01729				828.979	6.74767				828.979	6.74767
		46.8794	17.3985				162.518	1.99264				731.381	12.1269				1024.77	8.01729				829.58	6.74767				829.58	6.74767
		46.8994	17.3985				162.598	1.99213				731.982	12.1266				1025.48	8.01729				830.18	6.74767				830.18	6.74767
		46.9194	17.3985				162.678	1.99164				732.583	12.1264				1026.18	8.01729				830.781	6.74767				830.781	6.74767
		46.9394	17.3985				162.758	1.99116				733.183	12.1261				1026.88	8.01729				831.381	6.74767				831.381	6.74767
		46.9595	17.3985				162.838	1.99069				733.784	12.1259				1027.58	8.01729				831.982	6.74767				831.982	6.74767
		46.9795	17.3985				162.918	1.99022				734.384	12.1256				1028.28	8.01729				832.583	6.74767				832.583	6.74767
		46.9995	17.3985				162.998	1.98977				734.985	12.1254				1028.98	8.01729				833.183	6.74767				833.183	6.74767
		47.0195	17.3985				163.078	1.98932				735.586	12.1252				1029.68	8.01729				833.784	6.74767				833.784	6.74767
		47.0395	17.3985				163.158	1.98888				736.186	12.125				1030.38	8.01729				834.384	6.74767				834.384	6.74767
		47.0596	17.3985				163.238	1.98846				736.787	12.1248				1031.08	8.01729				834.985	6.74767				834.985	6.74767
		47.0796	17.3985				163.318	1.98804				737.387	12.1246				1031.78	8.01729				835.586	6.74767				835.586	6.74767
		47.0996	17.3985				163.398	1.98762				737.988	12.1244				1032.48	8.01729				836.186	6.74767				836.186	6.74767
		47.1196	17.3985				163.478	1.98722				738.589	12.1242				1033.18	8.01729				836.787	6.74767				836.787	6.74767
		47.1396	17.3985				163.559	1.98682				739.189	12.1241				1033.88	8.01729				837.387	6.74767				837.387	6.74767
		47.1597	17.3985				163.639	1.98643				739.79	12.1239				1034.58	8.01729				837.988	6.74767				837.988	6.74767
		47.1797	17.3985				163.719	1.98605				740.39	12.1238				1035.29	8.01729				838.589	6.74767				838.589	6.74767
		47.1997	17.3985				163.799	1.98568				740.991	12.1236				1035.99	8.01729				839.189	6.74767				839.189	6.74767
		47.2197	17.3985				163.879	1.98532				741.592	12.1235				1036.69	8.01729				839.79	6.74767				839.79	6.74767
		47.2397	17.3985				163.959	1.98496				742.192	12.1234				1037.39	8.01729				840.39	6.74767				840.39	6.74767
		47.2598	17.3985				164.039	1.98461				742.793	12.1232				1038.09	8.01729				840.991	6.74767				840.991	6.74767
		47.2798	17.3985				164.119	1.98426				743.393	12.1231				1038.79	8.01729				841.592	6.74767				841.592	6.74767
		47.2998	17.3985				164.199	1.98392				743.994	12.123				1039.49	8.01729				842.192	6.74767				842.192	6.74767
		47.3198	17.3985				164.279	1.98359				744.595	12.1229				1040.19	8.01729				842.793	6.74767				842.793	6.74767
		47.3398	17.3985				164.359	1.98327				745.195	12.1228				1040.89	8.01729				843.393	6.74767				843.393	6.74767
		47.3599	17.3985				164.439	1.98295				745.796	12.1227				1041.59	8.01729				843.994	6.74767				843.994	6.74767
		47.3799	17.3985				164.52	1.98264				746.396	12.1226				1042.29	8.01729				844.595	6.74767				844.595	6.74767
		47.3999	17.3985				164.6	1.98234				746.997	12.1225				1042.99	8.01729				845.195	6.74767				845.195	6.74767
		47.4199	17.3985				164.68	1.98204				747.598	12.1224				1043.69	8.01729				845.796	6.74767				845.796	6.74767
		47.4399	17.3985				164.76	1.98174				748.198	12.1223				1044.39	8.01729				846.396	6.74767				846.396	6.74767
		47.46	17.3985				164.84	1.98146				748.799	12.1222				1045.1	8.01729				846.997	6.74767				846.997	6.74767
		47.48	17.3985				164.92	1.98118				749.399	12.1222				1045.8	8.01729				847.598	6.74767				847.598	6.74767
		47.5	17.3985				165	1.9809				750	12.1221				1050	8.01729				850	6.74767				850	6.74767

## Sheet: Fig. S4j
x-axis-Temperature (°C)	y-axis-Residual Weight (%)	x-axis-Temperature (°C)	y-axis-Residual Weight (%)	x-axis-Temperature (°C)	y-axis-Residual Weight (%)	x-axis-Temperature (°C)	y-axis-Residual Weight (%)
P-PLA		MRSD-PLA2		MRSD-PLA4		MRSD-PLA6
31.9275	100	24.3189	100	30.518	100	26.7389	100
31.931	100.008	24.317	100.004	30.5173	100	26.7408	99.9997
31.9306	100.017	24.3159	100.008	30.5176	100	26.7405	99.9994
31.9279	100.026	24.3151	100.012	30.5171	100.001	26.7378	99.9991
31.9261	100.035	24.3137	100.016	30.5169	100.001	26.7345	99.9988
31.9255	100.043	24.3109	100.02	30.5176	100.001	26.7315	99.9985
31.924	100.052	24.3076	100.024	30.5167	100.001	26.729	99.9982
31.9205	100.06	24.3022	100.028	30.5183	100.002	26.7282	99.9979
31.9136	100.068	24.2986	100.032	30.5224	100.002	26.7288	99.9976
31.9058	100.075	24.299	100.036	30.5283	100.002	26.7321	99.9972
31.8958	100.084	24.2997	100.039	30.5341	100.002	26.7356	99.9969
31.8893	100.092	24.3003	100.043	30.5398	100.002	26.7397	99.9966
31.8881	100.101	24.3004	100.047	30.5435	100.003	26.745	99.9963
31.8885	100.109	24.2991	100.051	30.5457	100.003	26.7509	99.9959
31.8869	100.117	24.2985	100.055	30.5474	100.003	26.7572	99.9956
31.8875	100.125	24.3009	100.059	30.5492	100.003	26.7613	99.9953
31.8905	100.133	24.3053	100.063	30.5505	100.003	26.7636	99.995
31.8962	100.139	24.3113	100.065	30.5525	100.004	26.7652	99.9946
31.9006	100.143	24.3199	100.067	30.556	100.004	26.7674	99.9943
31.9075	100.146	24.3262	100.068	30.5592	100.004	26.7672	99.994
31.9162	100.148	24.3323	100.069	30.5622	100.004	26.7648	99.9936
31.9215	100.15	24.3403	100.069	30.5642	100.005	26.7613	99.9933
31.9249	100.151	24.347	100.069	30.5679	100.005	26.7564	99.9929
31.9281	100.152	24.3541	100.069	30.5727	100.005	26.7533	99.9926
31.932	100.152	24.3615	100.069	30.5786	100.005	26.7537	99.9922
31.9336	100.151	24.37	100.069	30.5847	100.005	26.7563	99.9919
31.9331	100.151	24.3806	100.068	30.5919	100.006	26.761	99.9916
31.9337	100.15	24.3912	100.068	30.5998	100.006	26.7666	99.9912
31.9361	100.15	24.4009	100.067	30.6057	100.006	26.7722	99.9908
31.936	100.149	24.4106	100.066	30.6119	100.006	26.7785	99.9905
31.9337	100.148	24.4206	100.065	30.6196	100.006	26.7866	99.9901
31.9332	100.147	24.431	100.064	30.628	100.007	26.7961	99.9898
31.9328	100.146	24.4454	100.064	30.6342	100.007	26.8086	99.9894
31.9328	100.145	24.4608	100.063	30.6396	100.007	26.8226	99.989
31.9358	100.144	24.4772	100.062	30.6447	100.007	26.8327	99.9886
31.9404	100.143	24.4925	100.061	30.6502	100.007	26.8414	99.9883
31.9464	100.142	24.5055	100.061	30.6571	100.008	26.8492	99.9879
31.9529	100.141	24.5183	100.06	30.6663	100.008	26.8577	99.9875
31.9592	100.141	24.5321	100.06	30.6782	100.008	26.8679	99.9871
31.9696	100.141	24.5467	100.06	30.6911	100.008	26.8831	99.9868
31.9823	100.14	24.5632	100.059	30.7002	100.008	26.9006	99.9864
31.9947	100.14	24.5803	100.058	30.707	100.009	26.9193	99.986
32.0066	100.139	24.5959	100.058	30.7166	100.009	26.9392	99.9856
32.0194	100.138	24.6122	100.057	30.7289	100.009	26.9605	99.9852
32.0292	100.137	24.6301	100.057	30.7437	100.009	26.9837	99.9848
32.0368	100.136	24.6483	100.056	30.7605	100.009	27.0087	99.9844
32.0439	100.136	24.6682	100.055	30.7769	100.01	27.0343	99.984
32.0526	100.135	24.6882	100.055	30.7917	100.01	27.0596	99.9836
32.0628	100.134	24.7085	100.054	30.8042	100.01	27.0875	99.9832
32.0724	100.133	24.7284	100.053	30.8144	100.01	27.1146	99.9828
32.0825	100.132	24.7491	100.053	30.8275	100.01	27.1408	99.9824
32.0949	100.131	24.7708	100.052	30.8442	100.011	27.1663	99.982
32.1105	100.13	24.7927	100.051	30.8614	100.011	27.193	99.9815
32.1252	100.13	24.8143	100.05	30.8782	100.011	27.2181	99.9811
32.1403	100.129	24.8352	100.05	30.8938	100.011	27.2428	99.9807
32.1549	100.128	24.8586	100.049	30.9089	100.011	27.2654	99.9803
32.1693	100.127	24.8821	100.048	30.9241	100.012	27.2873	99.9799
32.1806	100.126	24.9056	100.048	30.9396	100.012	27.309	99.9794
32.192	100.126	24.9294	100.047	30.9557	100.012	27.3275	99.979
32.2079	100.125	24.9546	100.047	30.9737	100.012	27.3454	99.9786
32.2259	100.124	24.9791	100.046	30.9934	100.012	27.3639	99.9781
32.2441	100.123	25.0038	100.046	31.0141	100.013	27.3834	99.9777
32.26	100.122	25.031	100.045	31.0336	100.013	27.3998	99.9772
32.2749	100.121	25.059	100.045	31.0525	100.013	27.4163	99.9768
32.2884	100.12	25.0886	100.044	31.0721	100.013	27.435	99.9764
32.3008	100.12	25.1158	100.044	31.0922	100.013	27.4566	99.9759
32.3126	100.119	25.143	100.044	31.1112	100.014	27.4788	99.9755
32.3263	100.117	25.1721	100.043	31.1279	100.014	27.5021	99.975
32.3394	100.117	25.2044	100.042	31.1435	100.014	27.5276	99.9745
32.3498	100.116	25.2362	100.042	31.1583	100.014	27.5556	99.9741
32.3591	100.115	25.2659	100.041	31.171	100.014	27.5828	99.9736
32.3673	100.114	25.2947	100.04	31.1842	100.015	27.6106	99.9732
32.375	100.113	25.3223	100.04	31.1998	100.015	27.6421	99.9727
32.3844	100.112	25.3489	100.039	31.2163	100.015	27.6751	99.9722
32.398	100.111	25.3761	100.039	31.2329	100.015	27.7048	99.9718
32.4153	100.11	25.4058	100.038	31.2496	100.015	27.7323	99.9713
32.4357	100.109	25.4382	100.038	31.267	100.016	27.7598	99.9708
32.4561	100.108	25.4715	100.038	31.2873	100.016	27.7897	99.9703
32.4775	100.107	25.5026	100.037	31.3077	100.016	27.8205	99.9698
32.5012	100.106	25.5329	100.037	31.3271	100.016	27.8496	99.9694
32.5252	100.105	25.5641	100.036	31.3472	100.016	27.8784	99.9689
32.547	100.104	25.5959	100.036	31.3671	100.017	27.9072	99.9684
32.5662	100.103	25.6288	100.036	31.385	100.017	27.9349	99.9679
32.5846	100.103	25.6677	100.035	31.4017	100.017	27.9604	99.9674
32.6011	100.102	25.7092	100.035	31.419	100.017	27.9864	99.9669
32.6164	100.1	25.7497	100.034	31.4372	100.017	28.0131	99.9664
32.6331	100.1	25.7853	100.034	31.4579	100.018	28.0397	99.9659
32.6498	100.099	25.8177	100.033	31.4768	100.018	28.0659	99.9654
32.6654	100.099	25.8499	100.033	31.4961	100.018	28.092	99.9649
32.6781	100.098	25.8831	100.033	31.5168	100.018	28.1206	99.9644
32.6902	100.097	25.918	100.033	31.5374	100.018	28.1498	99.9639
32.7047	100.096	25.954	100.032	31.559	100.019	28.1805	99.9634
32.7246	100.095	25.9894	100.032	31.5828	100.019	28.2105	99.9629
32.7477	100.095	26.0206	100.032	31.6081	100.019	28.2417	99.9623
32.7709	100.095	26.0475	100.032	31.6295	100.019	28.2744	99.9618
32.7943	100.094	26.0732	100.032	31.6503	100.019	28.3077	99.9613
32.8165	100.094	26.1012	100.031	31.6742	100.02	28.3434	99.9608
32.8378	100.093	26.1323	100.031	31.6995	100.02	28.3793	99.9603
32.8604	100.092	26.1637	100.03	31.7254	100.02	28.413	99.9597
32.8864	100.092	26.1962	100.03	31.7518	100.02	28.4439	99.9592
32.9147	100.091	26.2288	100.03	31.78	100.02	28.4732	99.9587
32.9419	100.09	26.2595	100.029	31.8097	100.02	28.5022	99.9582
32.9664	100.089	26.2918	100.029	31.8399	100.021	28.5325	99.9576
32.9881	100.089	26.3286	100.028	31.8703	100.021	28.5653	99.9571
33.0125	100.088	26.3689	100.027	31.9029	100.021	28.5968	99.9566
33.0393	100.088	26.4075	100.027	31.9346	100.021	28.6288	99.9561
33.0662	100.087	26.4469	100.027	31.9615	100.021	28.6617	99.9555
33.0923	100.086	26.4862	100.026	31.9874	100.022	28.6943	99.955
33.1167	100.086	26.526	100.026	32.0138	100.022	28.7274	99.9545
33.1369	100.085	26.5657	100.025	32.0392	100.022	28.7612	99.9539
33.1522	100.085	26.6065	100.025	32.0623	100.022	28.7974	99.9534
33.1682	100.084	26.6483	100.024	32.0839	100.022	28.8344	99.9528
33.1868	100.084	26.6906	100.024	32.1051	100.022	28.8726	99.9523
33.2095	100.083	26.7293	100.024	32.1264	100.023	28.9084	99.9518
33.2326	100.082	26.7646	100.023	32.1484	100.023	28.9454	99.9512
33.2548	100.081	26.8036	100.023	32.1737	100.023	28.9833	99.9507
33.2769	100.081	26.8423	100.022	32.2022	100.023	29.0194	99.9501
33.2998	100.08	26.8806	100.022	32.2319	100.023	29.0552	99.9496
33.3248	100.079	26.9199	100.022	32.2622	100.024	29.0936	99.949
33.351	100.078	26.9605	100.021	32.2921	100.024	29.1332	99.9485
33.3816	100.077	27.0017	100.02	32.3229	100.024	29.1708	99.948
33.4109	100.076	27.0425	100.02	32.3546	100.024	29.2083	99.9474
33.4412	100.076	27.0852	100.019	32.3865	100.024	29.2446	99.9468
33.4727	100.075	27.1273	100.019	32.4207	100.024	29.2796	99.9463
33.5044	100.074	27.1694	100.018	32.4552	100.025	29.3133	99.9457
33.5345	100.073	27.21	100.018	32.4876	100.025	29.3452	99.9452
33.5655	100.072	27.2521	100.017	32.5165	100.025	29.3777	99.9446
33.598	100.072	27.296	100.017	32.5423	100.025	29.412	99.9441
33.6294	100.071	27.3413	100.017	32.5668	100.025	29.4452	99.9435
33.6599	100.07	27.3838	100.016	32.5925	100.025	29.4784	99.9429
33.6896	100.07	27.4222	100.016	32.6192	100.026	29.5131	99.9424
33.7199	100.069	27.4628	100.015	32.6468	100.026	29.5475	99.9418
33.7502	100.069	27.5051	100.015	32.6739	100.026	29.5803	99.9412
33.7789	100.068	27.5476	100.015	32.6987	100.026	29.6151	99.9407
33.8056	100.068	27.5918	100.014	32.7222	100.026	29.6524	99.9401
33.8329	100.067	27.6363	100.014	32.7482	100.026	29.6923	99.9395
33.8584	100.067	27.6803	100.014	32.7766	100.027	29.7345	99.939
33.8806	100.066	27.7247	100.013	32.8079	100.027	29.777	99.9384
33.9049	100.065	27.7709	100.013	32.8431	100.027	29.8211	99.9378
33.9358	100.065	27.8175	100.013	32.8802	100.027	29.8652	99.9372
33.9691	100.064	27.8685	100.013	32.9173	100.027	29.9079	99.9367
34.0018	100.063	27.9205	100.013	32.9534	100.027	29.9514	99.9361
34.0318	100.063	27.9699	100.012	32.989	100.028	29.9962	99.9355
34.061	100.062	28.0192	100.012	33.0236	100.028	30.0407	99.9349
34.0895	100.061	28.0695	100.012	33.0583	100.028	30.083	99.9343
34.1186	100.06	28.1206	100.011	33.0923	100.028	30.1231	99.9337
34.1494	100.06	28.1712	100.011	33.1236	100.028	30.1626	99.9331
34.1843	100.059	28.2194	100.011	33.1541	100.028	30.2019	99.9326
34.2197	100.058	28.2643	100.011	33.1848	100.028	30.241	99.932
34.2518	100.058	28.3123	100.011	33.2164	100.029	30.2807	99.9314
34.2808	100.058	28.3627	100.011	33.2505	100.029	30.3219	99.9308
34.3101	100.057	28.4121	100.011	33.2869	100.029	30.3645	99.9301
34.3415	100.057	28.4596	100.01	33.3251	100.029	30.407	99.9295
34.3752	100.056	28.5065	100.01	33.3642	100.029	30.4502	99.9289
34.41	100.055	28.5509	100.01	33.404	100.029	30.4962	99.9283
34.4453	100.055	28.5942	100.009	33.4434	100.029	30.5437	99.9276
34.4809	100.055	28.637	100.009	33.4837	100.029	30.5925	99.927
34.5162	100.054	28.6828	100.009	33.5275	100.029	30.6416	99.9263
34.5499	100.053	28.7307	100.009	33.5732	100.029	30.689	99.9257
34.5851	100.053	28.7773	100.008	33.6164	100.029	30.7359	99.925
34.6226	100.052	28.824	100.008	33.6547	100.029	30.7833	99.9243
34.6606	100.052	28.8702	100.007	33.6919	100.029	30.8289	99.9236
34.6982	100.051	28.9175	100.007	33.7277	100.029	30.8736	99.923
34.7351	100.05	28.9662	100.007	33.7633	100.029	30.9187	99.9223
34.7727	100.049	29.018	100.006	33.8008	100.029	30.9635	99.9215
34.8101	100.048	29.0697	100.005	33.8403	100.029	31.0092	99.9208
34.8469	100.047	29.1207	100.005	33.8829	100.029	31.055	99.9201
34.8837	100.047	29.1723	100.005	33.9245	100.029	31.1008	99.9194
34.9224	100.047	29.2245	100.004	33.964	100.029	31.1475	99.9186
34.9617	100.047	29.2778	100.003	34.0025	100.029	31.1928	99.9179
34.9984	100.046	29.3297	100.003	34.0418	100.029	31.2358	99.9172
35.0331	100.045	29.3813	100.002	34.0757	100.029	31.2795	99.9164
35.0674	100.045	29.433	100.001	34.1072	100.029	31.3242	99.9157
35.1024	100.045	29.4845	100.001	34.1417	100.028	31.3696	99.915
35.136	100.045	29.5354	100	34.1765	100.028	31.415	99.9142
35.1702	100.045	29.5879	100	34.2117	100.028	31.4611	99.9135
35.2062	100.045	29.6414	99.9996	34.2475	100.028	31.507	99.9128
35.2435	100.045	29.6953	99.999	34.284	100.028	31.5512	99.912
35.2794	100.045	29.7473	99.9986	34.321	100.028	31.5951	99.9113
35.3163	100.045	29.7961	99.9982	34.3593	100.028	31.6412	99.9106
35.3553	100.045	29.8449	99.9978	34.3991	100.028	31.6901	99.9098
35.396	100.045	29.8943	99.9973	34.4426	100.027	31.7395	99.9091
35.4378	100.044	29.9444	99.9969	34.4904	100.027	31.7899	99.9084
35.4821	100.044	29.9958	99.9967	34.5367	100.027	31.8395	99.9077
35.526	100.044	30.0454	99.9963	34.5826	100.027	31.8888	99.907
35.5695	100.044	30.0946	99.9961	34.6278	100.027	31.937	99.9063
35.6119	100.044	30.1451	99.9957	34.6692	100.027	31.9854	99.9056
35.6514	100.044	30.1958	99.9956	34.7091	100.027	32.0359	99.9048
35.6902	100.044	30.2472	99.995	34.7488	100.026	32.0882	99.9041
35.7288	100.044	30.3004	99.9947	34.789	100.026	32.1409	99.9034
35.7644	100.044	30.3558	99.9943	34.8311	100.026	32.1922	99.9027
35.8005	100.044	30.411	99.9942	34.8748	100.026	32.2432	99.902
35.8379	100.044	30.4666	99.9938	34.9185	100.026	32.2931	99.9013
35.8739	100.044	30.5207	99.9934	34.9622	100.026	32.3445	99.9006
35.9101	100.044	30.5763	99.9931	35.0064	100.026	32.397	99.9
35.9481	100.043	30.6335	99.9931	35.0497	100.026	32.449	99.8993
35.9872	100.043	30.6901	99.9927	35.0941	100.025	32.4999	99.8986
36.028	100.043	30.7471	99.9926	35.1362	100.025	32.5493	99.8979
36.0698	100.043	30.8045	99.9927	35.1763	100.025	32.5969	99.8972
36.1116	100.043	30.8626	99.9925	35.214	100.025	32.6449	99.8965
36.1555	100.042	30.9198	99.9927	35.2519	100.025	32.6918	99.8958
36.2011	100.042	30.9756	99.9928	35.2891	100.025	32.7391	99.8952
36.2447	100.041	31.0336	99.9927	35.3263	100.025	32.7891	99.8945
36.2881	100.04	31.091	99.9927	35.365	100.024	32.8407	99.8938
36.3339	100.04	31.1464	99.9925	35.4045	100.024	32.8924	99.8932
36.3784	100.039	31.1998	99.9921	35.4446	100.024	32.9481	99.8925
36.4219	100.039	31.2548	99.9917	35.4856	100.024	33.0056	99.8918
36.4652	100.039	31.311	99.9916	35.5299	100.024	33.0643	99.8911
36.509	100.039	31.3674	99.9912	35.5794	100.024	33.1229	99.8905
36.5534	100.038	31.4229	99.9909	35.631	100.024	33.1796	99.8898
36.5993	100.037	31.4781	99.9906	35.68	100.024	33.2361	99.8892
36.6422	100.036	31.5332	99.9906	35.727	100.023	33.2932	99.8885
36.6857	100.036	31.5841	99.9906	35.7739	100.023	33.3488	99.8878
36.7294	100.035	31.6346	99.9902	35.8215	100.023	33.403	99.8872
36.7705	100.035	31.6882	99.99	35.87	100.023	33.4559	99.8865
36.8122	100.034	31.7455	99.9899	35.9192	100.023	33.5054	99.8859
36.8545	100.034	31.8036	99.9895	35.9685	100.023	33.5527	99.8852
36.8973	100.033	31.8623	99.9891	36.0188	100.023	33.6011	99.8846
36.9405	100.032	31.9212	99.9888	36.0667	100.022	33.6514	99.8839
36.9823	100.032	31.9792	99.9885	36.1146	100.022	33.7032	99.8833
37.0222	100.031	32.0356	99.9881	36.164	100.022	33.7566	99.8826
37.0621	100.031	32.094	99.9878	36.2156	100.022	33.8118	99.882
37.1021	100.03	32.1555	99.9878	36.2694	100.022	33.8679	99.8813
37.141	100.029	32.2181	99.9877	36.321	100.022	33.9244	99.8807
37.1809	100.028	32.2802	99.9876	36.3675	100.022	33.9806	99.88
37.2248	100.028	32.3405	99.9871	36.412	100.022	34.0364	99.8794
37.2706	100.027	32.3997	99.9871	36.4555	100.021	34.0945	99.8788
37.319	100.027	32.4574	99.987	36.5003	100.021	34.1528	99.8781
37.3696	100.026	32.5145	99.987	36.5471	100.021	34.21	99.8775
37.4221	100.026	32.5727	99.9869	36.5943	100.021	34.2649	99.8769
37.4741	100.025	32.6314	99.9867	36.6404	100.021	34.3167	99.8762
37.5262	100.025	32.6898	99.9863	36.6858	100.021	34.3684	99.8756
37.5796	100.025	32.7488	99.9859	36.7294	100.021	34.4205	99.875
37.6344	100.024	32.809	99.9856	36.7738	100.02	34.4729	99.8743
37.6892	100.024	32.8691	99.9852	36.822	100.02	34.5269	99.8737
37.7412	100.023	32.9271	99.9846	36.8727	100.02	34.5825	99.8731
37.7909	100.022	32.9863	99.9843	36.9246	100.02	34.6362	99.8725
37.8391	100.021	33.0458	99.9838	36.9749	100.02	34.6891	99.8718
37.8869	100.02	33.1058	99.9838	37.0208	100.02	34.7421	99.8712
37.933	100.02	33.1655	99.9836	37.0651	100.02	34.7991	99.8706
37.9784	100.019	33.2255	99.9838	37.1109	100.019	34.8598	99.87
38.0232	100.018	33.2854	99.9835	37.1585	100.019	34.9188	99.8694
38.0676	100.018	33.3438	99.9831	37.2079	100.019	34.9762	99.8688
38.1135	100.018	33.4018	99.9829	37.2607	100.019	35.0315	99.8681
38.1599	100.018	33.4582	99.9826	37.3127	100.019	35.0865	99.8675
38.2068	100.017	33.5164	99.9823	37.3635	100.019	35.1401	99.8669
38.2555	100.017	33.5746	99.9818	37.4153	100.019	35.1972	99.8663
38.3043	100.016	33.633	99.9812	37.4655	100.019	35.2573	99.8657
38.3499	100.016	33.6901	99.9809	37.5163	100.018	35.3177	99.8651
38.3952	100.016	33.7486	99.9805	37.5691	100.018	35.3741	99.8645
38.4419	100.016	33.8087	99.9804	37.6226	100.018	35.429	99.8639
38.4913	100.015	33.8702	99.9803	37.6746	100.018	35.4858	99.8633
38.5424	100.015	33.9334	99.9798	37.7249	100.018	35.5435	99.8627
38.5937	100.014	33.9977	99.9793	37.7726	100.018	35.6031	99.8621
38.6455	100.014	34.0632	99.979	37.8201	100.018	35.6613	99.8615
38.697	100.015	34.1299	99.9786	37.8692	100.017	35.7222	99.861
38.7465	100.015	34.1964	99.9783	37.9184	100.017	35.7825	99.8604
38.7951	100.014	34.2616	99.9779	37.9698	100.017	35.8399	99.8598
38.8454	100.014	34.3273	99.9775	38.0243	100.017	35.8952	99.8592
38.9002	100.014	34.3921	99.9771	38.0775	100.017	35.9504	99.8586
38.958	100.014	34.4572	99.9764	38.1264	100.017	36.006	99.858
39.0162	100.014	34.522	99.976	38.175	100.017	36.0602	99.8575
39.0736	100.014	34.5853	99.976	38.2243	100.016	36.1144	99.8569
39.1288	100.014	34.6489	99.9757	38.2743	100.016	36.1701	99.8563
39.18	100.014	34.7145	99.9752	38.3261	100.016	36.2275	99.8557
39.2321	100.015	34.7787	99.9749	38.3784	100.016	36.2837	99.8552
39.2868	100.015	34.8421	99.9743	38.4304	100.016	36.3387	99.8546
39.343	100.015	34.9052	99.9741	38.4825	100.016	36.3926	99.854
39.3993	100.015	34.9657	99.9741	38.5331	100.016	36.4474	99.8535
39.4537	100.015	35.0268	99.974	38.5847	100.015	36.5055	99.8529
39.5052	100.015	35.0892	99.9737	38.6385	100.015	36.5656	99.8523
39.5553	100.015	35.1525	99.9733	38.6951	100.015	36.6289	99.8518
39.6065	100.016	35.216	99.9732	38.7525	100.015	36.6923	99.8512
39.6606	100.016	35.2796	99.9728	38.8101	100.015	36.7536	99.8506
39.7182	100.016	35.341	99.9725	38.865	100.015	36.8139	99.8501
39.7744	100.016	35.4037	99.9724	38.9174	100.015	36.8744	99.8495
39.8276	100.015	35.4667	99.972	38.9697	100.014	36.9356	99.849
39.8807	100.015	35.53	99.9718	39.0237	100.014	36.9979	99.8484
39.933	100.016	35.5948	99.9715	39.0787	100.014	37.0603	99.8478
39.9849	100.016	35.6609	99.9715	39.1334	100.014	37.1208	99.8473
40.037	100.016	35.724	99.9713	39.189	100.014	37.1797	99.8467
40.0903	100.016	35.7858	99.9713	39.2446	100.014	37.2364	99.8462
40.1424	100.016	35.8475	99.971	39.2998	100.014	37.2943	99.8456
40.1951	100.016	35.9105	99.9711	39.3553	100.014	37.3531	99.8451
40.2471	100.016	35.9735	99.9709	39.4109	100.013	37.4124	99.8445
40.2999	100.016	36.0348	99.9708	39.4664	100.013	37.4715	99.844
40.353	100.016	36.096	99.9708	39.5205	100.013	37.5321	99.8434
40.4052	100.016	36.1571	99.9709	39.5731	100.013	37.592	99.8429
40.4566	100.016	36.2182	99.9705	39.6252	100.013	37.653	99.8423
40.5088	100.016	36.2788	99.9704	39.6787	100.013	37.7155	99.8418
40.5598	100.017	36.341	99.9704	39.7321	100.013	37.7793	99.8413
40.6095	100.017	36.4039	99.9705	39.7853	100.012	37.8449	99.8407
40.6585	100.017	36.4667	99.9704	39.8381	100.012	37.9106	99.8402
40.7064	100.017	36.528	99.9701	39.8923	100.012	37.9749	99.8396
40.7544	100.017	36.5892	99.9701	39.9464	100.012	38.0379	99.8391
40.806	100.017	36.6543	99.9699	40.0017	100.012	38.1007	99.8385
40.8604	100.018	36.7188	99.9701	40.0598	100.012	38.1621	99.838
40.9171	100.017	36.7845	99.9702	40.1192	100.012	38.224	99.8375
40.9761	100.017	36.8501	99.9701	40.1768	100.011	38.2848	99.8369
41.0363	100.017	36.9149	99.9699	40.2356	100.011	38.3456	99.8364
41.0973	100.017	36.981	99.9696	40.2951	100.011	38.407	99.8359
41.1578	100.018	37.0481	99.9694	40.3557	100.011	38.4673	99.8353
41.2188	100.018	37.1147	99.9693	40.4142	100.011	38.5253	99.8348
41.2792	100.018	37.1805	99.9691	40.4708	100.011	38.5839	99.8343
41.3402	100.019	37.2463	99.969	40.5284	100.01	38.6435	99.8337
41.4001	100.018	37.3111	99.9689	40.5874	100.01	38.7038	99.8332
41.4571	100.018	37.3775	99.9685	40.6462	100.01	38.7656	99.8327
41.5117	100.019	37.4453	99.9685	40.7042	100.01	38.8281	99.8321
41.5652	100.019	37.5145	99.9685	40.7622	100.01	38.8906	99.8316
41.6177	100.019	37.5868	99.9684	40.819	100.01	38.9544	99.8311
41.6709	100.019	37.6571	99.9682	40.8764	100.01	39.0185	99.8306
41.7264	100.018	37.7252	99.9677	40.9329	100.01	39.0824	99.83
41.7828	100.019	37.7937	99.9675	40.9912	100.009	39.1466	99.8295
41.84	100.019	37.8641	99.9672	41.0507	100.009	39.2109	99.829
41.897	100.019	37.9358	99.9669	41.1081	100.009	39.2765	99.8285
41.9554	100.019	38.008	99.9669	41.1648	100.009	39.3426	99.8279
42.0161	100.019	38.079	99.9667	41.2223	100.009	39.4071	99.8274
42.0781	100.019	38.1477	99.9662	41.2817	100.009	39.4705	99.8269
42.14	100.018	38.215	99.966	41.3422	100.008	39.5329	99.8264
42.2004	100.018	38.2804	99.9658	41.4034	100.008	39.5949	99.8259
42.2597	100.017	38.345	99.9656	41.4644	100.008	39.6566	99.8253
42.319	100.016	38.4128	99.9654	41.526	100.008	39.7185	99.8248
42.3785	100.016	38.4826	99.9649	41.5883	100.008	39.7814	99.8243
42.4372	100.015	38.5526	99.9645	41.6533	100.008	39.8442	99.8238
42.4984	100.014	38.6208	99.9645	41.7213	100.008	39.9073	99.8233
42.5581	100.013	38.6857	99.9643	41.7882	100.008	39.9704	99.8228
42.6161	100.012	38.7507	99.964	41.8536	100.007	40.0345	99.8223
42.6739	100.011	38.8167	99.9635	41.917	100.007	40.0998	99.8218
42.7322	100.011	38.8834	99.963	41.9776	100.007	40.1672	99.8213
42.7916	100.01	38.9525	99.9629	42.0369	100.007	40.236	99.8208
42.8515	100.01	39.0231	99.9625	42.0978	100.007	40.3017	99.8203
42.9089	100.01	39.0929	99.9623	42.1594	100.007	40.3663	99.8198
42.9652	100.009	39.1599	99.9624	42.2205	100.007	40.4318	99.8193
43.0243	100.008	39.2263	99.9624	42.281	100.006	40.4975	99.8188
43.0836	100.007	39.293	99.962	42.3394	100.006	40.563	99.8183
43.1432	100.007	39.3612	99.962	42.3984	100.006	40.6299	99.8178
43.205	100.007	39.4294	99.9617	42.4599	100.006	40.6965	99.8173
43.267	100.006	39.4967	99.9613	42.5195	100.006	40.7621	99.8169
43.3299	100.006	39.5639	99.961	42.5797	100.006	40.8263	99.8164
43.3921	100.006	39.6273	99.9607	42.6412	100.006	40.8895	99.8159
43.4544	100.006	39.6917	99.9601	42.7027	100.005	40.9544	99.8154
43.5186	100.005	39.7574	99.9602	42.7618	100.005	41.0225	99.8149
43.584	100.005	39.8238	99.9599	42.8218	100.005	41.0917	99.8144
43.6463	100.004	39.8906	99.9599	42.8816	100.005	41.1625	99.814
43.7035	100.004	39.9592	99.9597	42.9421	100.005	41.2346	99.8135
43.7594	100.003	40.0284	99.9597	43.0049	100.005	41.3037	99.813
43.814	100.003	40.0966	99.9594	43.0667	100.005	41.3703	99.8125
43.8694	100.003	40.1654	99.9592	43.1305	100.004	41.4367	99.812
43.9239	100.003	40.2323	99.9591	43.1963	100.004	41.5042	99.8116
43.9795	100.002	40.3023	99.9587	43.2628	100.004	41.5722	99.8111
44.0376	100.002	40.3718	99.9583	43.3297	100.004	41.6425	99.8106
44.0983	100.002	40.4406	99.9579	43.3953	100.004	41.7127	99.8101
44.1587	100.002	40.5083	99.9577	43.4596	100.004	41.7806	99.8097
44.2218	100.002	40.5761	99.9577	43.523	100.003	41.8473	99.8092
44.2876	100.002	40.6425	99.9576	43.5835	100.003	41.9124	99.8088
44.3557	100.002	40.7083	99.9573	43.6414	100.003	41.9777	99.8083
44.4226	100.003	40.7753	99.9571	43.6988	100.003	42.0441	99.8078
44.4887	100.003	40.8427	99.9569	43.7578	100.003	42.1118	99.8074
44.5546	100.003	40.913	99.9566	43.8157	100.003	42.1794	99.8069
44.6206	100.003	40.9874	99.9566	43.8733	100.003	42.2474	99.8064
44.684	100.002	41.0607	99.9562	43.9304	100.002	42.3131	99.806
44.7453	100.002	41.1333	99.9558	43.9867	100.002	42.3769	99.8055
44.8084	100.002	41.2068	99.9556	44.0443	100.002	42.4404	99.8051
44.8721	100.002	41.2809	99.9551	44.1023	100.002	42.5039	99.8046
44.9362	100.002	41.3545	99.9552	44.1627	100.002	42.5688	99.8042
45.0003	100.002	41.4266	99.955	44.2246	100.002	42.634	99.8037
45.0674	100.002	41.4961	99.9549	44.2865	100.001	42.7002	99.8033
45.1349	100.001	41.5639	99.9545	44.3476	100.001	42.7667	99.8028
45.2028	100.001	41.6315	99.9547	44.4094	100.001	42.8342	99.8024
45.271	100	41.6968	99.9536	44.4711	100.001	42.9	99.802
45.3399	100	41.7627	99.9536	44.5329	100.001	42.9652	99.8015
45.4089	100	41.8289	99.953	44.5974	100.001	43.0309	99.8011
45.4757	99.9998	41.8944	99.953	44.663	100	43.0978	99.8007
45.5414	99.9992	41.9604	99.9529	44.729	100	43.1655	99.8002
45.6059	99.999	42.0274	99.9528	44.7943	100	43.2336	99.7998
45.669	99.9986	42.0966	99.9525	44.8613	99.9999	43.3033	99.7994
45.73	99.9983	42.1675	99.9523	44.928	99.9998	43.3735	99.799
45.7904	99.9979	42.2423	99.9519	44.9951	99.9996	43.4421	99.7985
45.8514	99.9979	42.3185	99.9515	45.0617	99.9994	43.5097	99.7981
45.9131	99.9972	42.3935	99.9511	45.1284	99.9992	43.5777	99.7977
45.976	99.9968	42.4667	99.951	45.1929	99.9991	43.6465	99.7973
46.0391	99.9959	42.5401	99.951	45.2541	99.9989	43.7152	99.7969
46.1023	99.9955	42.6126	99.951	45.3155	99.9987	43.7826	99.7964
46.1647	99.9951	42.6848	99.9508	45.377	99.9985	43.8494	99.796
46.2273	99.9943	42.7569	99.9505	45.4413	99.9984	43.9159	99.7956
46.2898	99.9938	42.8277	99.9499	45.5058	99.9982	43.9809	99.7952
46.3529	99.9931	42.8974	99.9493	45.5711	99.998	44.0438	99.7948
46.4156	99.9925	42.9667	99.949	45.6385	99.9979	44.1055	99.7944
46.477	99.992	43.0351	99.9487	45.7072	99.9977	44.1687	99.794
46.539	99.9918	43.1029	99.9485	45.776	99.9975	44.233	99.7936
46.6011	99.9918	43.1719	99.9485	45.8455	99.9973	44.2991	99.7932
46.6619	99.9917	43.2417	99.9485	45.9165	99.9972	44.3668	99.7928
46.7234	99.9905	43.3114	99.9485	45.9854	99.997	44.4362	99.7924
46.7871	99.99	43.3805	99.9484	46.0519	99.9968	44.506	99.792
46.8524	99.9895	43.4476	99.9483	46.1159	99.9967	44.5733	99.7916
46.9185	99.9892	43.5162	99.9479	46.1782	99.9965	44.6385	99.7912
46.9845	99.9889	43.5882	99.9477	46.2406	99.9963	44.7062	99.7908
47.048	99.9888	43.6615	99.9474	46.3008	99.9961	44.7766	99.7904
47.1118	99.9882	43.7328	99.9469	46.3616	99.996	44.8477	99.79
47.1763	99.9879	43.8047	99.9472	46.4243	99.9958	44.9185	99.7896
47.243	99.9876	43.8763	99.947	46.4901	99.9956	44.9884	99.7892
47.3103	99.9874	43.9481	99.947	46.556	99.9955	45.0576	99.7888
47.38	99.987	44.0214	99.9469	46.623	99.9953	45.1272	99.7885
47.4492	99.987	44.0961	99.9466	46.6934	99.9951	45.1961	99.7881
47.5168	99.9865	44.1711	99.9462	46.7637	99.9949	45.2658	99.7877
47.5836	99.9858	44.2473	99.946	46.8347	99.9948	45.3378	99.7873
47.651	99.9857	44.32	99.9457	46.9042	99.9946	45.4097	99.7869
47.7193	99.9855	44.3907	99.9456	46.9714	99.9944	45.4823	99.7865
47.7896	99.9854	44.4619	99.9454	47.0357	99.9943	45.5547	99.7861
47.8586	99.9855	44.5324	99.9457	47.0991	99.9941	45.6265	99.7857
47.9237	99.9853	44.6037	99.9456	47.1614	99.9939	45.7001	99.7853
47.9877	99.985	44.6741	99.9455	47.2238	99.9938	45.7724	99.785
48.0499	99.9852	44.7441	99.9452	47.2877	99.9936	45.8436	99.7846
48.1124	99.9848	44.8162	99.945	47.3496	99.9934	45.9149	99.7842
48.1774	99.9851	44.8894	99.9449	47.412	99.9933	45.9874	99.7838
48.2437	99.9849	44.9612	99.9452	47.4747	99.9931	46.0608	99.7834
48.3101	99.9847	45.0347	99.9454	47.5395	99.993	46.1354	99.7831
48.377	99.985	45.1099	99.9452	47.6091	99.9928	46.2086	99.7827
48.4454	99.985	45.1857	99.9452	47.6801	99.9926	46.2819	99.7823
48.5125	99.9847	45.2617	99.945	47.7506	99.9925	46.3556	99.7819
48.5801	99.9849	45.3374	99.945	47.8207	99.9923	46.4276	99.7815
48.6492	99.9845	45.4135	99.9449	47.8892	99.9921	46.5008	99.7812
48.7176	99.9844	45.4892	99.945	47.9564	99.992	46.5744	99.7808
48.7829	99.9845	45.562	99.9447	48.0246	99.9918	46.6477	99.7804
48.8455	99.9845	45.6352	99.9446	48.093	99.9917	46.7211	99.78
48.91	99.9842	45.7104	99.9446	48.1605	99.9915	46.7935	99.7797
48.9793	99.9841	45.7843	99.9448	48.2287	99.9913	46.8655	99.7793
49.0506	99.984	45.858	99.945	48.2959	99.9912	46.9381	99.7789
49.1202	99.984	45.9306	99.9446	48.3644	99.991	47.0112	99.7785
49.1896	99.9834	46.0039	99.9447	48.4342	99.9908	47.0839	99.7782
49.2598	99.9835	46.0783	99.9447	48.5045	99.9907	47.1562	99.7778
49.3298	99.9829	46.1521	99.9448	48.5769	99.9905	47.2275	99.7774
49.3987	99.982	46.2261	99.9449	48.6505	99.9903	47.2986	99.7771
49.4687	99.9818	46.3001	99.9449	48.7236	99.9902	47.3693	99.7767
49.5427	99.9818	46.375	99.9448	48.7962	99.99	47.4389	99.7763
49.615	99.9815	46.449	99.9448	48.8713	99.9899	47.5083	99.7759
49.6814	99.9813	46.5236	99.9449	48.9431	99.9897	47.5786	99.7756
49.7454	99.9809	46.5973	99.9452	49.0156	99.9895	47.6492	99.7752
49.8103	99.9807	46.6713	99.9454	49.0852	99.9894	47.7196	99.7749
49.8759	99.9801	46.7453	99.9452	49.1535	99.9892	47.7887	99.7745
49.9402	99.9798	46.8173	99.9453	49.2213	99.989	47.8567	99.7741
50.0039	99.9794	46.8899	99.9451	49.2864	99.9888	47.926	99.7738
50.0702	99.9792	46.963	99.9449	49.3506	99.9887	47.995	99.7734
50.1389	99.9793	47.0368	99.9448	49.4141	99.9885	48.0629	99.773
50.2061	99.979	47.1108	99.9447	49.4789	99.9883	48.133	99.7727
50.275	99.9787	47.1837	99.9442	49.5423	99.9882	48.206	99.7723
50.3448	99.9784	47.2554	99.9438	49.6088	99.988	48.278	99.772
50.4162	99.9782	47.3276	99.9439	49.674	99.9878	48.3496	99.7716
50.4866	99.978	47.3995	99.9439	49.7416	99.9877	48.4209	99.7713
50.556	99.9779	47.472	99.9442	49.8111	99.9875	48.4932	99.7709
50.6249	99.9772	47.547	99.9447	49.8804	99.9874	48.5675	99.7706
50.6943	99.9764	47.6223	99.9448	49.9519	99.9872	48.6417	99.7702
50.7627	99.976	47.6983	99.9448	50.0264	99.987	48.7147	99.7699
50.8284	99.9756	47.7751	99.945	50.1015	99.9869	48.7894	99.7695
50.8968	99.9755	47.8518	99.9454	50.1756	99.9867	48.8632	99.7692
50.9643	99.9755	47.9297	99.9463	50.2482	99.9865	48.933	99.7688
51.0316	99.9752	48.0079	99.9459	50.3204	99.9864	49.0027	99.7685
51.0975	99.975	48.0861	99.9457	50.3933	99.9862	49.0722	99.7682
51.1634	99.9748	48.1654	99.9459	50.4652	99.986	49.1407	99.7678
51.2311	99.9754	48.2435	99.9457	50.5356	99.9859	49.2101	99.7675
51.3002	99.9753	48.3201	99.9456	50.6056	99.9857	49.2794	99.7672
51.3707	99.9755	48.3948	99.9455	50.6741	99.9855	49.3497	99.7669
51.4413	99.9754	48.4694	99.9453	50.7403	99.9854	49.4215	99.7665
51.5152	99.9753	48.5445	99.9451	50.8055	99.9852	49.4935	99.7662
51.5877	99.9752	48.6184	99.9451	50.8722	99.9851	49.5655	99.7659
51.6576	99.9748	48.6897	99.9449	50.9424	99.9849	49.6398	99.7656
51.7275	99.9746	48.7601	99.9452	51.0134	99.9847	49.715	99.7652
51.7986	99.9749	48.8327	99.9452	51.0849	99.9846	49.7908	99.7649
51.87	99.9752	48.9078	99.9452	51.156	99.9844	49.8674	99.7646
51.9419	99.9755	48.9841	99.945	51.2259	99.9843	49.9438	99.7643
52.0138	99.9754	49.0593	99.9454	51.2961	99.9841	50.0191	99.764
52.0848	99.9753	49.1339	99.9451	51.3673	99.984	50.094	99.7637
52.1547	99.9754	49.2073	99.9451	51.4416	99.9838	50.1697	99.7634
52.2239	99.9754	49.2794	99.945	51.5186	99.9836	50.2452	99.7631
52.2925	99.9751	49.3534	99.9449	51.5959	99.9835	50.3212	99.7627
52.3597	99.975	49.4279	99.945	51.6689	99.9833	50.3961	99.7624
52.426	99.9753	49.5059	99.9451	51.7398	99.9832	50.4721	99.7621
52.4918	99.9748	49.5822	99.9454	51.8075	99.983	50.5476	99.7618
52.558	99.9747	49.6561	99.9456	51.8747	99.9829	50.6206	99.7615
52.6243	99.9747	49.7312	99.9458	51.9429	99.9827	50.6916	99.7612
52.6919	99.9745	49.8067	99.9452	52.0102	99.9826	50.763	99.7609
52.7631	99.9742	49.8832	99.9447	52.0763	99.9824	50.8337	99.7606
52.8368	99.9739	49.9599	99.9441	52.141	99.9823	50.9024	99.7603
52.9125	99.9734	50.0366	99.9435	52.2035	99.9821	50.971	99.76
52.987	99.973	50.1121	99.9429	52.2648	99.982	51.0418	99.7597
53.0608	99.9726	50.1878	99.9422	52.3296	99.9818	51.1138	99.7595
53.1336	99.9721	50.2615	99.9422	52.395	99.9817	51.1854	99.7592
53.2058	99.9716	50.3347	99.9423	52.462	99.9815	51.2575	99.7589
53.2789	99.9718	50.4077	99.9418	52.5295	99.9814	51.3316	99.7586
53.3518	99.9715	50.479	99.9419	52.5972	99.9812	51.4066	99.7583
53.4234	99.9711	50.5503	99.9419	52.6662	99.9811	51.4806	99.758
53.493	99.9707	50.6228	99.942	52.7384	99.9809	51.5568	99.7578
53.5609	99.9706	50.6983	99.9418	52.8109	99.9808	51.6344	99.7575
53.6271	99.9701	50.7749	99.9419	52.8828	99.9807	51.7116	99.7572
53.6952	99.9698	50.8515	99.9417	52.9555	99.9805	51.7887	99.7569
53.7665	99.9697	50.9288	99.9418	53.028	99.9804	51.8653	99.7566
53.8416	99.9699	51.0065	99.9418	53.1018	99.9802	51.9419	99.7564
53.9176	99.9699	51.0837	99.9418	53.1776	99.9801	52.0173	99.7561
53.9907	99.9701	51.1604	99.9417	53.2535	99.98	52.0926	99.7558
54.0624	99.9696	51.2372	99.9414	53.3295	99.9798	52.1688	99.7556
54.1348	99.9692	51.315	99.9414	53.4051	99.9797	52.2471	99.7553
54.2077	99.9695	51.3921	99.9413	53.4796	99.9795	52.3254	99.7551
54.2815	99.9693	51.4672	99.9411	53.5553	99.9794	52.4014	99.7548
54.3557	99.9682	51.5417	99.9411	53.6328	99.9792	52.4782	99.7545
54.4296	99.9682	51.6159	99.9412	53.71	99.9791	52.5547	99.7543
54.5011	99.9681	51.6893	99.9416	53.7871	99.979	52.6295	99.7541
54.571	99.9679	51.7617	99.9417	53.8624	99.9788	52.7039	99.7538
54.6406	99.968	51.835	99.9416	53.9358	99.9787	52.7782	99.7536
54.7121	99.9679	51.9077	99.9416	54.0118	99.9785	52.8518	99.7533
54.7841	99.9677	51.9802	99.9409	54.0872	99.9784	52.9239	99.7531
54.8553	99.9675	52.0534	99.9411	54.1608	99.9783	52.996	99.7528
54.9247	99.9675	52.128	99.9412	54.2339	99.9781	53.0677	99.7526
54.9935	99.9672	52.201	99.9412	54.3039	99.978	53.1388	99.7524
55.0616	99.967	52.2735	99.9414	54.3713	99.9779	53.2094	99.7521
55.1304	99.9666	52.3469	99.9415	54.4375	99.9777	53.2789	99.7519
55.2002	99.9669	52.4217	99.9414	54.5037	99.9776	53.3478	99.7517
55.2701	99.9674	52.4973	99.9419	54.5699	99.9775	53.4162	99.7514
55.3402	99.9676	52.5717	99.9419	54.638	99.9773	53.486	99.7512
55.4101	99.9673	52.6467	99.9422	54.7048	99.9772	53.557	99.751
55.4808	99.9664	52.7227	99.942	54.7721	99.9771	53.6298	99.7507
55.5532	99.966	52.7982	99.9418	54.8427	99.9769	53.7025	99.7505
55.6276	99.9656	52.8746	99.9416	54.9154	99.9768	53.7752	99.7503
55.7017	99.9652	52.953	99.9416	54.989	99.9766	53.8487	99.7501
55.7768	99.9654	53.0327	99.9417	55.0634	99.9765	53.9253	99.7498
55.8527	99.9649	53.1119	99.9418	55.1376	99.9763	54.0037	99.7496
55.9286	99.965	53.1898	99.9419	55.2128	99.9762	54.0844	99.7494
56.0055	99.9646	53.2675	99.942	55.2885	99.9761	54.1652	99.7492
56.0841	99.9642	53.3461	99.942	55.3636	99.9759	54.2442	99.749
56.1625	99.9633	53.4253	99.9419	55.4385	99.9758	54.322	99.7488
56.2389	99.9626	53.5048	99.9419	55.5138	99.9756	54.3972	99.7485
56.3132	99.9623	53.5837	99.9417	55.5898	99.9755	54.4725	99.7483
56.3859	99.9612	53.6612	99.9417	55.6646	99.9753	54.5468	99.7481
56.4573	99.96	53.739	99.9417	55.7398	99.9752	54.6222	99.7479
56.5275	99.96	53.8176	99.9414	55.8157	99.975	54.6985	99.7477
56.5962	99.9593	53.895	99.9415	55.8932	99.9749	54.7738	99.7475
56.6644	99.9593	53.9705	99.9414	55.9711	99.9748	54.8474	99.7473
56.733	99.9586	54.0466	99.9413	56.0469	99.9746	54.9223	99.7471
56.8013	99.9593	54.1233	99.9414	56.1212	99.9745	54.9993	99.7468
56.8692	99.9594	54.1986	99.9415	56.196	99.9743	55.0776	99.7466
56.9392	99.9581	54.2742	99.9418	56.2673	99.9742	55.1561	99.7464
57.0106	99.9574	54.3511	99.942	56.3371	99.974	55.2339	99.7462
57.0833	99.957	54.4283	99.9419	56.4066	99.9739	55.3104	99.746
57.1567	99.9568	54.5036	99.9416	56.4763	99.9737	55.3851	99.7458
57.2312	99.9571	54.5779	99.9418	56.547	99.9736	55.4579	99.7456
57.3054	99.9575	54.6534	99.9419	56.6189	99.9734	55.5301	99.7454
57.3808	99.9577	54.7316	99.942	56.6911	99.9733	55.6038	99.7452
57.4552	99.9581	54.8098	99.9422	56.7639	99.9731	55.6756	99.745
57.5284	99.9579	54.8873	99.9422	56.8385	99.973	55.7466	99.7448
57.6024	99.9578	54.9648	99.9421	56.9125	99.9728	55.8175	99.7447
57.6769	99.9577	55.0414	99.9425	56.9898	99.9727	55.8905	99.7445
57.751	99.9577	55.1161	99.9425	57.0681	99.9725	55.9654	99.7443
57.8252	99.9577	55.1924	99.9427	57.1466	99.9724	56.0432	99.7441
57.9009	99.9579	55.2693	99.943	57.2242	99.9723	56.1229	99.7439
57.9738	99.9579	55.3465	99.9432	57.2994	99.9721	56.2022	99.7437
58.0481	99.9584	55.4225	99.9431	57.3744	99.972	56.2806	99.7436
58.1216	99.9589	55.4984	99.9434	57.4497	99.9718	56.3578	99.7434
58.1943	99.9594	55.5725	99.9437	57.5278	99.9717	56.4352	99.7432
58.268	99.9595	55.6474	99.944	57.6017	99.9715	56.5135	99.743
58.3422	99.9593	55.725	99.9439	57.6742	99.9714	56.5909	99.7429
58.4156	99.96	55.804	99.944	57.7471	99.9712	56.6668	99.7427
58.4877	99.9599	55.8826	99.9439	57.8181	99.9711	56.7412	99.7425
58.561	99.9599	55.9591	99.9441	57.8883	99.9709	56.8131	99.7424
58.6327	99.9603	56.0362	99.9442	57.9564	99.9708	56.8843	99.7422
58.7061	99.961	56.1126	99.9442	58.0265	99.9706	56.956	99.742
58.781	99.9615	56.1889	99.9443	58.0951	99.9705	57.0282	99.7419
58.8551	99.9615	56.2646	99.9443	58.1624	99.9703	57.1017	99.7417
58.93	99.9618	56.3417	99.9442	58.2278	99.9702	57.1766	99.7416
59.006	99.9617	56.4185	99.9443	58.2979	99.97	57.2498	99.7414
59.0812	99.9616	56.4931	99.9442	58.3716	99.9699	57.3221	99.7413
59.154	99.9633	56.5674	99.944	58.4455	99.9697	57.3955	99.7411
59.2277	99.9637	56.6433	99.9436	58.5214	99.9696	57.4705	99.741
59.3015	99.9634	56.72	99.9435	58.5973	99.9694	57.5491	99.7408
59.3754	99.9634	56.795	99.9437	58.676	99.9693	57.6289	99.7407
59.4493	99.9632	56.8706	99.9437	58.7558	99.9692	57.7091	99.7406
59.5218	99.9627	56.9478	99.9432	58.8341	99.969	57.7884	99.7404
59.5941	99.9623	57.0244	99.9431	58.9123	99.9689	57.8675	99.7403
59.669	99.9614	57.1004	99.9429	58.9905	99.9687	57.9456	99.7402
59.7447	99.9605	57.1778	99.9427	59.0677	99.9686	58.025	99.74
59.8208	99.9601	57.2567	99.9425	59.1437	99.9685	58.104	99.7399
59.8992	99.9601	57.3349	99.9426	59.2179	99.9683	58.183	99.7398
59.9769	99.9604	57.4122	99.9426	59.2915	99.9682	58.2612	99.7397
60.0528	99.9601	57.4904	99.9424	59.3673	99.968	58.3376	99.7395
60.1271	99.9595	57.5699	99.9424	59.4447	99.9679	58.4129	99.7394
60.2016	99.9595	57.6492	99.9422	59.5217	99.9678	58.489	99.7393
60.2777	99.9593	57.7268	99.9422	59.5985	99.9676	58.5664	99.7392
60.3557	99.9592	57.8047	99.9419	59.6754	99.9675	58.6427	99.7391
60.4328	99.9585	57.8825	99.9418	59.7527	99.9674	58.7181	99.739
60.5079	99.9583	57.9586	99.9412	59.8297	99.9672	58.7947	99.7388
60.5831	99.9582	58.0323	99.9409	59.9048	99.9671	58.8723	99.7387
60.658	99.958	58.1074	99.9408	59.978	99.9669	58.95	99.7386
60.7339	99.9579	58.185	99.941	60.0496	99.9668	59.0273	99.7385
60.8117	99.9582	58.2611	99.9409	60.1185	99.9667	59.1031	99.7384
60.8907	99.9584	58.3364	99.9407	60.1883	99.9665	59.1782	99.7383
60.9685	99.9582	58.4117	99.9405	60.2589	99.9664	59.2525	99.7382
61.0465	99.9579	58.4897	99.9403	60.3314	99.9663	59.3264	99.7381
61.1238	99.9577	58.5679	99.94	60.4058	99.9661	59.4014	99.738
61.1997	99.9582	58.6472	99.94	60.4789	99.966	59.4774	99.7379
61.2747	99.9585	58.7286	99.9397	60.5508	99.9659	59.5526	99.7378
61.3488	99.9588	58.8102	99.9396	60.624	99.9657	59.629	99.7377
61.4219	99.9576	58.889	99.9393	60.6987	99.9656	59.7072	99.7376
61.4954	99.9566	58.9677	99.9395	60.7744	99.9655	59.7869	99.7375
61.5696	99.9568	59.0465	99.9395	60.8522	99.9654	59.8676	99.7374
61.642	99.9572	59.1251	99.9395	60.9281	99.9652	59.9484	99.7373
61.7171	99.9573	59.2055	99.9394	61.002	99.9651	60.0282	99.7372
61.7906	99.9574	59.2843	99.9397	61.0749	99.965	60.1069	99.7371
61.8611	99.9572	59.3627	99.9398	61.1465	99.9648	60.1833	99.737
61.9321	99.9578	59.4426	99.9399	61.2189	99.9647	60.258	99.7369
62.0039	99.9583	59.523	99.9401	61.2921	99.9646	60.3331	99.7369
62.0749	99.959	59.6051	99.9402	61.3662	99.9644	60.4049	99.7368
62.1478	99.9592	59.6883	99.94	61.4415	99.9643	60.4753	99.7367
62.2221	99.9593	59.7703	99.9397	61.5187	99.9642	60.5432	99.7366
62.2961	99.9589	59.851	99.9397	61.5958	99.964	60.611	99.7365
62.3708	99.9593	59.9311	99.9394	61.6763	99.9639	60.6802	99.7364
62.4447	99.9595	60.01	99.9391	61.7559	99.9638	60.7509	99.7363
62.5167	99.9595	60.0891	99.939	61.8339	99.9636	60.8236	99.7362
62.5927	99.9596	60.1684	99.9387	61.9115	99.9635	60.8978	99.7361
62.669	99.96	60.2452	99.9389	61.9877	99.9634	60.9724	99.736
62.745	99.9605	60.32	99.9388	62.0643	99.9632	61.0457	99.7359
62.8219	99.9609	60.3946	99.9391	62.1406	99.9631	61.12	99.7358
62.8962	99.9611	60.4703	99.9395	62.2161	99.963	61.1954	99.7357
62.9681	99.9614	60.5469	99.9394	62.2903	99.9628	61.2724	99.7356
63.0386	99.9613	60.6249	99.9397	62.3641	99.9627	61.349	99.7355
63.1098	99.961	60.7052	99.9393	62.4354	99.9626	61.4252	99.7354
63.181	99.961	60.7848	99.9394	62.5073	99.9624	61.5012	99.7353
63.2547	99.9612	60.8642	99.9394	62.5825	99.9623	61.5767	99.7352
63.3298	99.9615	60.9416	99.9397	62.6576	99.9621	61.6529	99.7352
63.4074	99.9617	61.0204	99.9398	62.7351	99.962	61.73	99.7351
63.4847	99.9616	61.0996	99.9401	62.8126	99.9619	61.8084	99.7349
63.5625	99.9606	61.178	99.9398	62.8895	99.9617	61.8891	99.7348
63.6416	99.9605	61.2557	99.9399	62.9666	99.9616	61.9703	99.7348
63.723	99.961	61.3324	99.9402	63.0449	99.9615	62.0501	99.7347
63.8047	99.9612	61.4094	99.9406	63.1231	99.9613	62.1294	99.7345
63.8858	99.9614	61.4871	99.9405	63.1987	99.9612	62.2083	99.7344
63.967	99.9616	61.5627	99.9405	63.2725	99.961	62.286	99.7344
64.0467	99.9615	61.6381	99.9406	63.3455	99.9609	62.365	99.7343
64.1228	99.9612	61.7139	99.9407	63.4212	99.9608	62.4454	99.7342
64.1957	99.961	61.7918	99.941	63.4986	99.9606	62.5263	99.7341
64.269	99.9611	61.8701	99.9411	63.5747	99.9605	62.6079	99.734
64.3415	99.9608	61.9504	99.9414	63.6494	99.9604	62.6885	99.7339
64.4139	99.9608	62.0306	99.9419	63.7234	99.9602	62.768	99.7338
64.4865	99.9603	62.1107	99.9424	63.7967	99.9601	62.848	99.7337
64.5588	99.9601	62.1902	99.9432	63.8675	99.9599	62.9288	99.7336
64.6324	99.9597	62.2679	99.9439	63.9398	99.9598	63.0089	99.7335
64.7046	99.9594	62.3463	99.9445	64.0161	99.9596	63.0895	99.7334
64.779	99.959	62.4257	99.945	64.093	99.9595	63.1674	99.7333
64.8566	99.9583	62.5053	99.9456	64.1679	99.9594	63.2404	99.7332
64.933	99.958	62.5842	99.9464	64.2409	99.9592	63.3124	99.7331
65.0078	99.9572	62.6624	99.9473	64.3159	99.9591	63.3853	99.733
65.0839	99.9565	62.7395	99.9484	64.3931	99.959	63.4592	99.7329
65.1604	99.9558	62.8164	99.9494	64.4702	99.9588	63.5327	99.7328
65.2372	99.9554	62.8936	99.9502	64.5471	99.9587	63.6066	99.7327
65.3144	99.9545	62.9709	99.9514	64.6253	99.9586	63.6808	99.7326
65.3914	99.9539	63.0494	99.9525	64.7055	99.9584	63.7558	99.7325
65.4684	99.9531	63.1287	99.9539	64.7827	99.9583	63.8326	99.7324
65.5444	99.9527	63.2066	99.9555	64.8578	99.9582	63.9102	99.7323
65.6202	99.9522	63.284	99.957	64.9334	99.958	63.9896	99.7322
65.6985	99.9515	63.3606	99.9582	65.0094	99.9579	64.0687	99.7321
65.7769	99.9507	63.4364	99.9598	65.0842	99.9578	64.1452	99.732
65.8552	99.9503	63.5111	99.9615	65.158	99.9576	64.2205	99.7319
65.9331	99.9495	63.5846	99.9631	65.2327	99.9575	64.2964	99.7318
66.011	99.9491	63.6595	99.9647	65.3081	99.9574	64.3729	99.7317
66.0898	99.949	63.7352	99.9662	65.3842	99.9572	64.4511	99.7317
66.1703	99.9484	63.8093	99.9678	65.46	99.9571	64.5308	99.7315
66.2525	99.9476	63.8832	99.9695	65.5365	99.957	64.6096	99.7314
66.3343	99.947	63.9592	99.9714	65.6133	99.9568	64.6887	99.7314
66.4148	99.9466	64.0373	99.9732	65.6902	99.9567	64.7694	99.7312
66.4922	99.946	64.1169	99.9749	65.7675	99.9566	64.8502	99.7311
66.5704	99.9457	64.197	99.9767	65.8436	99.9564	64.9331	99.731
66.6484	99.9455	64.2767	99.9783	65.9178	99.9563	65.0176	99.7309
66.7267	99.9452	64.3575	99.9802	65.9921	99.9562	65.1007	99.7308
66.8044	99.9454	64.4396	99.9819	66.0671	99.956	65.1808	99.7307
66.8818	99.945	64.5204	99.9835	66.1416	99.9559	65.2595	99.7306
66.9556	99.9447	64.6009	99.9853	66.2145	99.9558	65.3367	99.7305
67.0272	99.9444	64.681	99.987	66.2883	99.9556	65.4152	99.7304
67.1008	99.9444	64.7614	99.9884	66.3615	99.9555	65.4952	99.7303
67.1756	99.9445	64.841	99.9901	66.4353	99.9554	65.5734	99.7301
67.2515	99.9441	64.9198	99.9918	66.5086	99.9552	65.6501	99.73
67.3282	99.9441	64.9982	99.9934	66.5825	99.9551	65.7256	99.7299
67.4047	99.9436	65.0805	99.9948	66.6586	99.955	65.7972	99.7298
67.4813	99.9437	65.1621	99.9962	66.7349	99.9548	65.8691	99.7297
67.5566	99.9433	65.2418	99.9977	66.8101	99.9547	65.9445	99.7296
67.6328	99.9432	65.3211	99.9993	66.8842	99.9546	66.0217	99.7294
67.7133	99.9429	65.4012	100	66.9589	99.9545	66.0982	99.7293
67.7949	99.9429	65.4805	100.002	67.0322	99.9543	66.1749	99.7292
67.876	99.9427	65.5585	100.003	67.1058	99.9542	66.2486	99.729
67.9559	99.9427	65.6363	100.004	67.1803	99.9541	66.3211	99.7289
68.0331	99.9423	65.7143	100.005	67.2546	99.954	66.397	99.7288
68.1068	99.9419	65.792	100.006	67.3294	99.9538	66.4753	99.7286
68.1806	99.9415	65.8696	100.007	67.4039	99.9537	66.5552	99.7285
68.2549	99.9415	65.9479	100.008	67.4801	99.9536	66.6351	99.7284
68.3303	99.9413	66.0264	100.009	67.5573	99.9534	66.713	99.7282
68.4069	99.9407	66.1038	100.011	67.6371	99.9533	66.7884	99.7281
68.4812	99.9401	66.1821	100.011	67.7186	99.9532	66.8651	99.7279
68.5584	99.9398	66.2619	100.012	67.8005	99.9531	66.9406	99.7278
68.6364	99.9392	66.341	100.013	67.881	99.9529	67.0167	99.7276
68.7147	99.9388	66.4213	100.014	67.9551	99.9528	67.0945	99.7275
68.7941	99.9383	66.5024	100.015	68.0286	99.9527	67.1713	99.7274
68.8745	99.938	66.5846	100.016	68.1049	99.9526	67.2474	99.7272
68.9574	99.9374	66.6655	100.017	68.1834	99.9524	67.3258	99.727
69.0416	99.9368	66.7438	100.017	68.2638	99.9523	67.407	99.7269
69.1245	99.9358	66.8211	100.018	68.3432	99.9522	67.4885	99.7267
69.2053	99.9349	66.9004	100.019	68.4201	99.952	67.5705	99.7266
69.286	99.9343	66.9801	100.02	68.4958	99.9519	67.6525	99.7264
69.3654	99.9336	67.0586	100.02	68.5717	99.9518	67.7361	99.7263
69.4438	99.933	67.1383	100.021	68.65	99.9517	67.8202	99.7261
69.5222	99.9322	67.2171	100.022	68.7328	99.9515	67.9054	99.7259
69.6016	99.9314	67.2951	100.022	68.8188	99.9514	67.9903	99.7258
69.683	99.9306	67.372	100.022	68.9011	99.9513	68.0735	99.7256
69.7642	99.9302	67.4494	100.023	68.9805	99.9511	68.1556	99.7254
69.8425	99.9293	67.5295	100.023	69.0567	99.951	68.237	99.7253
69.9215	99.9286	67.611	100.024	69.1326	99.9509	68.3189	99.7251
70.0016	99.9278	67.6944	100.024	69.2105	99.9508	68.4006	99.7249
70.0804	99.9273	67.776	100.024	69.2894	99.9506	68.4816	99.7248
70.1551	99.9264	67.8583	100.025	69.3685	99.9505	68.5608	99.7246
70.2292	99.9257	67.939	100.025	69.4463	99.9504	68.6391	99.7244
70.3023	99.925	68.0202	100.025	69.5247	99.9502	68.7156	99.7242
70.3731	99.9243	68.1018	100.026	69.6021	99.9501	68.7913	99.7241
70.4444	99.9239	68.1823	100.026	69.6798	99.95	68.8689	99.7239
70.5168	99.9232	68.2616	100.026	69.7585	99.9498	68.9463	99.7237
70.5886	99.9229	68.3405	100.026	69.8381	99.9497	69.0219	99.7235
70.6604	99.9226	68.418	100.026	69.9164	99.9496	69.0959	99.7233
70.7313	99.9218	68.494	100.027	69.9924	99.9494	69.1705	99.7232
70.8019	99.9218	68.57	100.027	70.0676	99.9493	69.2474	99.723
70.8761	99.9215	68.646	100.028	70.1421	99.9492	69.3261	99.7228
70.9524	99.9216	68.7232	100.028	70.2161	99.949	69.406	99.7226
71.0301	99.9217	68.8029	100.028	70.2912	99.9489	69.4884	99.7224
71.1104	99.9209	68.8823	100.028	70.3673	99.9488	69.5724	99.7222
71.1917	99.9206	68.9631	100.028	70.4456	99.9486	69.6552	99.722
71.2699	99.9203	69.0436	100.028	70.5234	99.9485	69.7378	99.7219
71.3517	99.92	69.1251	100.029	70.6019	99.9484	69.8202	99.7216
71.4372	99.9198	69.2077	100.029	70.6811	99.9482	69.9032	99.7215
71.5249	99.9197	69.2902	100.029	70.7623	99.9481	69.9871	99.7213
71.614	99.9197	69.3747	100.029	70.8447	99.948	70.07	99.7211
71.7032	99.9198	69.4616	100.029	70.9275	99.9478	70.1522	99.7209
71.7899	99.9198	69.5475	100.029	71.011	99.9477	70.2336	99.7207
71.8759	99.9202	69.6319	100.029	71.094	99.9476	70.3143	99.7205
71.9607	99.9205	69.7153	100.029	71.1769	99.9474	70.3939	99.7203
72.0435	99.9207	69.7998	100.03	71.2585	99.9473	70.4742	99.7201
72.1275	99.9206	69.887	100.03	71.3406	99.9471	70.5537	99.7199
72.2066	99.9206	69.9734	100.029	71.4219	99.947	70.6333	99.7197
72.2824	99.9206	70.0574	100.029	71.5024	99.9468	70.7142	99.7195
72.3563	99.921	70.1417	100.029	71.5822	99.9467	70.7934	99.7193
72.4301	99.9215	70.2244	100.03	71.6616	99.9466	70.8731	99.7191
72.5014	99.922	70.3042	100.03	71.741	99.9464	70.9525	99.7189
72.5766	99.922	70.3836	100.03	71.8207	99.9463	71.0325	99.7186
72.6528	99.922	70.4628	100.03	71.9002	99.9462	71.1132	99.7184
72.7289	99.922	70.5412	100.03	71.978	99.946	71.193	99.7182
72.8057	99.9221	70.6172	100.03	72.0537	99.9459	71.2713	99.718
72.8845	99.9223	70.6922	100.03	72.1283	99.9457	71.3483	99.7178
72.965	99.9221	70.7674	100.03	72.2038	99.9456	71.4255	99.7175
73.047	99.9215	70.8448	100.03	72.2804	99.9454	71.5039	99.7173
73.1297	99.9216	70.9228	100.03	72.3584	99.9453	71.5838	99.7171
73.21	99.9213	71.0016	100.03	72.4378	99.9452	71.6631	99.7168
73.2905	99.9215	71.0814	100.03	72.518	99.945	71.7432	99.7166
73.3702	99.9215	71.1624	100.03	72.5989	99.9449	71.8233	99.7164
73.4495	99.9214	71.2437	100.03	72.6815	99.9447	71.9017	99.7161
73.5303	99.9215	71.3254	100.03	72.7656	99.9446	71.9796	99.7159
73.613	99.9212	71.4081	100.03	72.8514	99.9444	72.0586	99.7156
73.695	99.9214	71.493	100.03	72.9367	99.9443	72.1388	99.7154
73.7773	99.9213	71.5767	100.029	73.0196	99.9441	72.2191	99.7151
73.8591	99.9218	71.6599	100.029	73.102	99.944	72.2975	99.7149
73.9401	99.9213	71.7435	100.029	73.1852	99.9439	72.3753	99.7146
74.023	99.9214	71.8257	100.028	73.2683	99.9437	72.4551	99.7144
74.1056	99.9209	71.9086	100.028	73.3509	99.9436	72.5336	99.7141
74.1882	99.9207	71.9928	100.028	73.4333	99.9434	72.6106	99.7139
74.2676	99.9206	72.0766	100.028	73.5152	99.9433	72.6882	99.7136
74.3405	99.9203	72.1595	100.028	73.5962	99.9431	72.7665	99.7133
74.4107	99.9202	72.2434	100.028	73.6764	99.943	72.8451	99.7131
74.4829	99.9201	72.3253	100.028	73.7569	99.9428	72.9232	99.7128
74.5568	99.9195	72.4065	100.028	73.8383	99.9427	73.0005	99.7125
74.6321	99.9195	72.4878	100.028	73.9215	99.9425	73.0769	99.7123
74.7083	99.9198	72.5694	100.028	74.0023	99.9424	73.1538	99.712
74.7857	99.9199	72.652	100.027	74.0792	99.9422	73.2326	99.7117
74.8651	99.9198	72.7337	100.027	74.1523	99.9421	73.313	99.7114
74.944	99.9198	72.8138	100.027	74.2248	99.9419	73.3954	99.7112
75.0219	99.9201	72.8932	100.027	74.2977	99.9418	73.4788	99.7109
75.1052	99.9202	72.9735	100.027	74.3721	99.9416	73.5632	99.7106
75.1914	99.9204	73.0533	100.027	74.4491	99.9415	73.6461	99.7103
75.2756	99.9203	73.132	100.026	74.5283	99.9413	73.7286	99.71
75.3573	99.92	73.2118	100.026	74.6078	99.9412	73.8146	99.7097
75.4379	99.9198	73.2909	100.025	74.6886	99.941	73.9044	99.7094
75.5191	99.9199	73.3687	100.025	74.7696	99.9409	73.9934	99.7091
75.5991	99.9204	73.4466	100.025	74.8527	99.9407	74.0793	99.7088
75.6791	99.9205	73.5242	100.025	74.9374	99.9406	74.1635	99.7085
75.7595	99.9201	73.6026	100.025	75.0239	99.9404	74.2458	99.7082
75.8404	99.9195	73.6833	100.024	75.1097	99.9403	74.3261	99.7079
75.921	99.919	73.7658	100.024	75.1924	99.9401	74.4046	99.7076
76.0012	99.9187	73.8478	100.024	75.2729	99.9399	74.4832	99.7073
76.0828	99.9189	73.9309	100.024	75.3516	99.9398	74.5634	99.707
76.1638	99.9188	74.0134	100.024	75.4316	99.9396	74.6435	99.7067
76.2458	99.9186	74.0965	100.024	75.5104	99.9395	74.7209	99.7064
76.3254	99.9189	74.1782	100.023	75.5897	99.9393	74.7977	99.706
76.4031	99.9186	74.2591	100.023	75.6684	99.9392	74.8755	99.7057
76.4795	99.9188	74.3423	100.023	75.7476	99.939	74.9533	99.7054
76.5559	99.9192	74.4267	100.023	75.8254	99.9388	75.0314	99.7051
76.6331	99.919	74.5091	100.022	75.9035	99.9387	75.1109	99.7047
76.7127	99.9185	74.5898	100.022	75.982	99.9385	75.1918	99.7044
76.793	99.9181	74.6703	100.022	76.0597	99.9384	75.2735	99.7041
76.8723	99.918	74.7503	100.021	76.1365	99.9382	75.3575	99.7037
76.9507	99.9181	74.8309	100.021	76.212	99.938	75.4405	99.7034
77.0276	99.9181	74.9126	100.021	76.286	99.9379	75.523	99.7031
77.1043	99.9182	74.9974	100.021	76.3586	99.9377	75.606	99.7027
77.1837	99.918	75.0833	100.02	76.4329	99.9376	75.687	99.7024
77.2659	99.9173	75.1678	100.02	76.5094	99.9374	75.7674	99.702
77.3473	99.9168	75.25	100.02	76.5882	99.9372	75.8475	99.7017
77.4304	99.9158	75.3327	100.02	76.6664	99.9371	75.9257	99.7013
77.5132	99.9153	75.4154	100.02	76.7447	99.9369	76.0033	99.701
77.5947	99.9147	75.4978	100.019	76.8252	99.9368	76.081	99.7006
77.6762	99.9142	75.5804	100.018	76.9069	99.9366	76.1583	99.7002
77.7595	99.9143	75.6615	100.018	76.99	99.9364	76.2353	99.6999
77.8441	99.914	75.7413	100.018	77.0746	99.9363	76.3128	99.6995
77.9298	99.914	75.8204	100.018	77.1604	99.9361	76.391	99.6991
78.0141	99.9139	75.8987	100.018	77.2466	99.9359	76.4715	99.6988
78.0955	99.9134	75.9772	100.017	77.3301	99.9358	76.5524	99.6984
78.1761	99.9125	76.0567	100.017	77.4124	99.9356	76.634	99.698
78.2566	99.9127	76.135	100.017	77.4939	99.9354	76.7184	99.6977
78.336	99.9126	76.2144	100.017	77.5744	99.9353	76.8028	99.6973
78.4137	99.9124	76.2942	100.017	77.6551	99.9351	76.8874	99.6969
78.4905	99.9119	76.3736	100.016	77.7353	99.935	76.9716	99.6966
78.5639	99.9114	76.452	100.015	77.8151	99.9348	77.0549	99.6962
78.6364	99.9112	76.5313	100.015	77.8958	99.9346	77.1384	99.6958
78.7096	99.9104	76.6108	100.015	77.9773	99.9345	77.2209	99.6954
78.784	99.9103	76.6905	100.015	78.0591	99.9343	77.301	99.695
78.86	99.9096	76.7709	100.015	78.1414	99.9341	77.3794	99.6946
78.9374	99.909	76.8518	100.014	78.224	99.934	77.4588	99.6943
79.0163	99.9082	76.9329	100.014	78.306	99.9338	77.536	99.6939
79.096	99.908	77.0152	100.014	78.3884	99.9336	77.6119	99.6935
79.1774	99.9073	77.098	100.013	78.4701	99.9335	77.6881	99.6931
79.2588	99.9074	77.1813	100.013	78.5499	99.9333	77.7655	99.6927
79.3407	99.9072	77.2667	100.013	78.6294	99.9331	77.843	99.6923
79.421	99.9067	77.3528	100.013	78.7084	99.933	77.9195	99.6919
79.5	99.9062	77.4379	100.013	78.7863	99.9328	77.9972	99.6915
79.5775	99.9056	77.5244	100.013	78.8647	99.9326	78.0773	99.6911
79.6555	99.9052	77.6098	100.013	78.9454	99.9325	78.1588	99.6907
79.7343	99.9051	77.6947	100.013	79.0268	99.9323	78.2368	99.6903
79.8112	99.9053	77.7785	100.013	79.1078	99.9321	78.3159	99.6899
79.8891	99.9054	77.8615	100.012	79.1879	99.932	78.3973	99.6895
79.9669	99.9056	77.9433	100.012	79.2662	99.9318	78.4795	99.6891
80.0479	99.9056	78.0246	100.012	79.3464	99.9316	78.5607	99.6886
80.131	99.9057	78.1059	100.012	79.4298	99.9315	78.642	99.6882
80.2156	99.9056	78.1871	100.012	79.513	99.9313	78.7252	99.6878
80.3014	99.9055	78.2681	100.012	79.5951	99.9311	78.808	99.6874
80.3884	99.9046	78.3474	100.011	79.6761	99.9309	78.8895	99.687
80.4745	99.9041	78.427	100.011	79.756	99.9308	78.9712	99.6865
80.5572	99.9038	78.5072	100.011	79.8364	99.9306	79.0559	99.6861
80.6377	99.9034	78.5901	100.011	79.9174	99.9304	79.1407	99.6857
80.7163	99.9036	78.6739	100.011	80.0001	99.9303	79.2255	99.6852
80.7944	99.9041	78.7564	100.011	80.0851	99.9301	79.309	99.6848
80.8694	99.9041	78.8396	100.01	80.1711	99.9299	79.3922	99.6844
80.9434	99.9042	78.9217	100.01	80.256	99.9297	79.4752	99.6839
81.0213	99.9039	79.0032	100.01	80.339	99.9296	79.5582	99.6835
81.1014	99.9036	79.0867	100.01	80.4193	99.9294	79.6415	99.683
81.1804	99.903	79.1716	100.01	80.4974	99.9292	79.7267	99.6826
81.2594	99.9032	79.2584	100.01	80.5764	99.929	79.8125	99.6821
81.3399	99.9031	79.3446	100.009	80.653	99.9288	79.8973	99.6816
81.4233	99.903	79.4284	100.009	80.7292	99.9287	79.9823	99.6812
81.5062	99.9025	79.5098	100.009	80.8068	99.9285	80.0654	99.6807
81.589	99.9021	79.5923	100.009	80.8852	99.9283	80.1487	99.6802
81.671	99.9018	79.6744	100.008	80.9638	99.9282	80.2318	99.6797
81.7517	99.902	79.7566	100.008	81.0428	99.928	80.3131	99.6792
81.8303	99.902	79.8402	100.007	81.1211	99.9278	80.3924	99.6787
81.9078	99.9017	79.9223	100.007	81.2028	99.9276	80.4704	99.6783
81.986	99.9014	80.0035	100.007	81.2877	99.9274	80.5479	99.6778
82.0659	99.9015	80.084	100.007	81.3701	99.9273	80.6243	99.6773
82.1465	99.9019	80.163	100.007	81.4523	99.9271	80.7018	99.6768
82.2267	99.9026	80.2435	100.006	81.5356	99.9269	80.7805	99.6763
82.3084	99.9023	80.3256	100.006	81.6184	99.9267	80.8611	99.6757
82.3911	99.902	80.4081	100.006	81.7006	99.9266	80.942	99.6752
82.4746	99.902	80.4914	100.005	81.7836	99.9264	81.0239	99.6747
82.5593	99.9019	80.576	100.005	81.8651	99.9262	81.1074	99.6742
82.6421	99.9016	80.6603	100.005	81.9477	99.926	81.1925	99.6737
82.7232	99.9015	80.7434	100.005	82.031	99.9259	81.279	99.6732
82.8044	99.9017	80.8252	100.005	82.1134	99.9257	81.3655	99.6726
82.8845	99.9016	80.9059	100.004	82.1952	99.9255	81.4519	99.6721
82.9625	99.9016	80.9876	100.004	82.2794	99.9253	81.5381	99.6715
83.0418	99.902	81.0701	100.004	82.3649	99.9251	81.622	99.671
83.1213	99.9019	81.1526	100.003	82.4505	99.925	81.7052	99.6705
83.2015	99.9012	81.2349	100.003	82.5348	99.9248	81.7902	99.6699
83.2831	99.9011	81.3172	100.003	82.6155	99.9246	81.8742	99.6694
83.3658	99.9006	81.3992	100.002	82.6944	99.9244	81.9569	99.6688
83.4501	99.9003	81.4801	100.002	82.7729	99.9242	82.0409	99.6683
83.5352	99.9005	81.5623	100.001	82.8523	99.924	82.1248	99.6677
83.6205	99.901	81.6453	100.001	82.934	99.9239	82.2096	99.6672
83.7049	99.9006	81.7283	100.001	83.0174	99.9237	82.2938	99.6666
83.7896	99.9004	81.8108	100	83.0989	99.9235	82.3745	99.666
83.8727	99.8999	81.8934	100	83.1784	99.9233	82.4555	99.6654
83.9536	99.8999	81.976	99.9994	83.258	99.9231	82.5379	99.6649
84.0289	99.9002	82.0578	99.9991	83.3382	99.9229	82.6188	99.6643
84.1069	99.9003	82.1407	99.9987	83.4207	99.9227	82.7004	99.6637
84.1883	99.8998	82.2227	99.9986	83.5042	99.9225	82.7838	99.6631
84.2733	99.8994	82.3041	99.9986	83.5858	99.9223	82.8666	99.6625
84.3556	99.899	82.386	99.9985	83.6661	99.9221	82.9485	99.662
84.4361	99.899	82.4679	99.9981	83.746	99.9219	83.0286	99.6613
84.5165	99.899	82.5501	99.9977	83.8251	99.9217	83.1092	99.6607
84.5979	99.8994	82.6327	99.9969	83.9047	99.9215	83.1923	99.6602
84.68	99.8989	82.7133	99.9962	83.9854	99.9213	83.2757	99.6595
84.762	99.8987	82.795	99.9957	84.0646	99.9211	83.3565	99.6589
84.8447	99.8985	82.8787	99.9951	84.143	99.9209	83.437	99.6583
84.9243	99.8984	82.9626	99.9948	84.221	99.9207	83.5172	99.6577
84.9994	99.8983	83.0473	99.9945	84.3007	99.9205	83.5969	99.6571
85.0708	99.8979	83.1332	99.9942	84.3817	99.9203	83.6767	99.6565
85.1455	99.8977	83.2176	99.994	84.4633	99.9201	83.7576	99.6558
85.2234	99.8975	83.3016	99.9937	84.5428	99.9199	83.8391	99.6552
85.3026	99.8975	83.3857	99.9931	84.6206	99.9197	83.9201	99.6546
85.3811	99.897	83.4687	99.9927	84.6971	99.9195	84.0014	99.6539
85.4581	99.8967	83.5534	99.992	84.7719	99.9193	84.0843	99.6533
85.5371	99.8965	83.6372	99.9915	84.8485	99.9191	84.1686	99.6527
85.6188	99.8965	83.7185	99.9912	84.9274	99.9189	84.2519	99.652
85.7003	99.8962	83.799	99.9907	85.008	99.9187	84.3354	99.6514
85.7809	99.896	83.8781	99.9904	85.0879	99.9185	84.4188	99.6507
85.8633	99.8963	83.9568	99.9903	85.1686	99.9183	84.5005	99.6501
85.9455	99.8961	84.0362	99.9899	85.2518	99.9181	84.5813	99.6494
86.028	99.896	84.1161	99.9896	85.3353	99.9179	84.6623	99.6488
86.1098	99.8955	84.1955	99.9893	85.421	99.9177	84.7428	99.6481
86.1912	99.8948	84.2744	99.9887	85.5087	99.9175	84.8226	99.6475
86.2755	99.8949	84.3533	99.9881	85.5982	99.9172	84.9026	99.6468
86.3607	99.8939	84.4324	99.9877	85.6873	99.917	84.9818	99.6462
86.4456	99.8935	84.5128	99.9871	85.7752	99.9168	85.0615	99.6455
86.5319	99.8937	84.5938	99.9868	85.8605	99.9166	85.1415	99.6448
86.62	99.8939	84.676	99.9862	85.9443	99.9164	85.2198	99.6442
86.7074	99.8934	84.7587	99.9857	86.0266	99.9162	85.2979	99.6435
86.7947	99.8924	84.841	99.9851	86.1076	99.916	85.3764	99.6428
86.8794	99.8919	84.9244	99.9846	86.1901	99.9158	85.4562	99.6421
86.9625	99.891	85.0093	99.9843	86.2724	99.9156	85.5372	99.6415
87.0455	99.8904	85.0949	99.984	86.354	99.9154	85.6183	99.6408
87.1268	99.8897	85.1812	99.9835	86.4353	99.9151	85.6995	99.6401
87.2067	99.8896	85.2663	99.9831	86.5163	99.9149	85.7796	99.6394
87.2884	99.8895	85.35	99.9827	86.5972	99.9147	85.8605	99.6387
87.3715	99.8895	85.4331	99.9824	86.6789	99.9145	85.9418	99.6381
87.454	99.8891	85.5153	99.982	86.7614	99.9143	86.0228	99.6374
87.536	99.8891	85.5979	99.9813	86.8432	99.9141	86.1057	99.6367
87.6172	99.8887	85.6806	99.9807	86.9228	99.9138	86.1899	99.636
87.6974	99.8878	85.7638	99.9801	87.0024	99.9136	86.275	99.6353
87.7794	99.8873	85.8475	99.9794	87.0827	99.9134	86.359	99.6346
87.8611	99.887	85.9307	99.9789	87.1631	99.9132	86.4433	99.6339
87.945	99.8868	86.0143	99.9784	87.244	99.913	86.5264	99.6332
88.0292	99.8869	86.0984	99.9783	87.3249	99.9128	86.6102	99.6325
88.1112	99.8862	86.1832	99.9777	87.4062	99.9126	86.6957	99.6318
88.1919	99.8858	86.2665	99.9769	87.4876	99.9124	86.7815	99.6311
88.2725	99.8858	86.3498	99.9763	87.5681	99.9121	86.8672	99.6304
88.3536	99.8856	86.4329	99.9757	87.6493	99.9119	86.9531	99.6296
88.436	99.8856	86.5163	99.9751	87.7337	99.9117	87.0382	99.6289
88.5199	99.8849	86.5988	99.9748	87.8165	99.9115	87.121	99.6282
88.603	99.8848	86.6796	99.9741	87.8973	99.9113	87.2023	99.6275
88.6865	99.8848	86.7607	99.9734	87.9795	99.9111	87.2839	99.6268
88.7687	99.8844	86.8413	99.9728	88.0603	99.9109	87.3673	99.626
88.8496	99.8845	86.9214	99.9724	88.1418	99.9107	87.4505	99.6253
88.9309	99.8843	87.0021	99.9722	88.2237	99.9105	87.5329	99.6246
89.0123	99.8833	87.0842	99.9721	88.3066	99.9102	87.6134	99.6238
89.092	99.8824	87.1658	99.9715	88.3912	99.91	87.6935	99.6231
89.1694	99.8825	87.246	99.9709	88.4766	99.9098	87.7721	99.6224
89.2452	99.8832	87.3253	99.9704	88.5604	99.9096	87.8496	99.6216
89.3211	99.8827	87.4068	99.9699	88.6431	99.9094	87.9284	99.6209
89.3988	99.8826	87.4879	99.9693	88.7275	99.9092	88.0086	99.6201
89.4773	99.8825	87.5703	99.9687	88.8109	99.909	88.0903	99.6194
89.5562	99.8822	87.6519	99.9681	88.8928	99.9087	88.1703	99.6186
89.6364	99.8817	87.735	99.9676	88.9732	99.9085	88.2496	99.6179
89.7175	99.8817	87.8183	99.9671	89.0507	99.9083	88.3296	99.6171
89.7965	99.8813	87.9025	99.9664	89.1271	99.9081	88.4099	99.6164
89.8745	99.8809	87.9861	99.9657	89.2016	99.9078	88.4901	99.6156
89.9544	99.8805	88.069	99.965	89.2779	99.9076	88.5722	99.6149
90.0358	99.88	88.1525	99.9644	89.3551	99.9074	88.6556	99.6141
90.1166	99.88	88.2349	99.9637	89.4336	99.9072	88.7378	99.6133
90.1981	99.8803	88.3175	99.9632	89.5125	99.907	88.8208	99.6126
90.2801	99.8805	88.4002	99.9628	89.5907	99.9068	88.9019	99.6118
90.362	99.8806	88.4828	99.9624	89.6705	99.9065	88.9826	99.611
90.4448	99.88	88.5646	99.9617	89.7511	99.9063	89.0649	99.6103
90.5267	99.8798	88.6436	99.9615	89.8338	99.9061	89.1476	99.6095
90.6109	99.8801	88.7208	99.9611	89.9179	99.9058	89.2291	99.6087
90.6968	99.8797	88.7979	99.9607	90.0025	99.9056	89.3128	99.6079
90.7824	99.8792	88.8773	99.9601	90.0861	99.9054	89.3973	99.6071
90.8663	99.8788	88.9587	99.9595	90.1685	99.9052	89.4809	99.6064
90.9504	99.8785	89.0411	99.9587	90.251	99.9049	89.5651	99.6056
91.0315	99.8782	89.1234	99.9581	90.3327	99.9047	89.6482	99.6048
91.1117	99.8783	89.2061	99.9577	90.4146	99.9045	89.732	99.604
91.1933	99.8785	89.2893	99.9575	90.4984	99.9042	89.8154	99.6032
91.274	99.8788	89.3723	99.957	90.5832	99.904	89.8984	99.6024
91.3534	99.8788	89.457	99.9564	90.668	99.9038	89.9798	99.6016
91.4311	99.8788	89.5431	99.9559	90.7528	99.9035	90.0607	99.6008
91.5087	99.8786	89.6289	99.9551	90.8385	99.9033	90.1411	99.6
91.5883	99.8787	89.7142	99.9545	90.9242	99.903	90.2204	99.5992
91.6692	99.8784	89.7983	99.9541	91.0112	99.9028	90.2995	99.5984
91.7502	99.8782	89.881	99.9536	91.0974	99.9026	90.3795	99.5976
91.8331	99.8788	89.9634	99.9531	91.1796	99.9023	90.4593	99.5968
91.9163	99.8786	90.0454	99.9524	91.26	99.9021	90.539	99.596
91.9974	99.8785	90.1261	99.952	91.3397	99.9018	90.6206	99.5952
92.0774	99.879	90.2062	99.9518	91.419	99.9016	90.702	99.5944
92.1589	99.8784	90.2859	99.9515	91.4988	99.9013	90.7824	99.5936
92.2421	99.8786	90.3655	99.9513	91.5785	99.9011	90.8623	99.5927
92.3249	99.8786	90.4448	99.9507	91.6576	99.9008	90.9448	99.5919
92.4077	99.8783	90.5256	99.9503	91.7369	99.9005	91.0274	99.5911
92.4894	99.8777	90.6068	99.95	91.8167	99.9003	91.1101	99.5903
92.5716	99.8776	90.6878	99.9497	91.8959	99.9	91.1934	99.5895
92.6537	99.8773	90.7689	99.9494	91.9771	99.8998	91.2775	99.5886
92.7356	99.877	90.849	99.9487	92.0587	99.8995	91.3607	99.5878
92.8186	99.8765	90.9296	99.9483	92.1389	99.8993	91.4414	99.587
92.9009	99.8765	91.0108	99.9478	92.219	99.899	91.5216	99.5861
92.9839	99.8763	91.0922	99.9475	92.2992	99.8988	91.6037	99.5853
93.0667	99.8759	91.1734	99.9473	92.3788	99.8985	91.6878	99.5845
93.1505	99.8754	91.2574	99.9468	92.4588	99.8983	91.7695	99.5836
93.2322	99.8751	91.3426	99.946	92.5396	99.898	91.8499	99.5828
93.3137	99.8743	91.4273	99.9454	92.6213	99.8977	91.9306	99.582
93.3945	99.8742	91.5118	99.9451	92.7051	99.8975	92.0107	99.5811
93.4732	99.8744	91.596	99.9448	92.7912	99.8972	92.0904	99.5803
93.5502	99.8744	91.6795	99.9443	92.8793	99.8969	92.1708	99.5794
93.6272	99.8742	91.7623	99.9437	92.9667	99.8967	92.253	99.5786
93.7061	99.8738	91.8455	99.9433	93.053	99.8964	92.3374	99.5777
93.7871	99.8738	91.9302	99.9431	93.1386	99.8962	92.4207	99.5768
93.8665	99.8741	92.015	99.9427	93.2242	99.8959	92.5035	99.576
93.9444	99.8743	92.098	99.9425	93.3065	99.8956	92.5864	99.5751
94.0236	99.8743	92.1792	99.9424	93.3858	99.8953	92.6709	99.5742
94.1042	99.8742	92.2605	99.942	93.4644	99.8951	92.7558	99.5734
94.1846	99.8747	92.3446	99.9418	93.5427	99.8948	92.8417	99.5725
94.2666	99.8745	92.4283	99.9414	93.6198	99.8946	92.9276	99.5716
94.352	99.8745	92.5147	99.9413	93.6979	99.8943	93.0115	99.5707
94.4367	99.8746	92.6015	99.941	93.7777	99.894	93.0971	99.5699
94.5216	99.8746	92.6877	99.9407	93.8593	99.8938	93.182	99.569
94.6037	99.8747	92.7718	99.9403	93.9421	99.8935	93.2661	99.5681
94.6863	99.8748	92.8556	99.94	94.0246	99.8932	93.3492	99.5672
94.7707	99.8747	92.9405	99.9392	94.1083	99.893	93.4321	99.5663
94.8564	99.8749	93.026	99.9391	94.1937	99.8927	93.5151	99.5654
94.9413	99.8753	93.1113	99.9385	94.2797	99.8924	93.5973	99.5645
95.0281	99.8758	93.1946	99.938	94.3639	99.8922	93.6777	99.5636
95.1145	99.8762	93.2765	99.9375	94.4456	99.8919	93.7568	99.5627
95.1977	99.8761	93.3574	99.9374	94.5266	99.8916	93.8376	99.5618
95.2809	99.8764	93.4379	99.9372	94.6059	99.8914	93.9155	99.5609
95.3633	99.8766	93.5194	99.9372	94.6843	99.8911	93.9922	99.5599
95.4466	99.8768	93.6006	99.9369	94.7618	99.8908	94.0701	99.559
95.5274	99.8767	93.682	99.9364	94.8398	99.8906	94.1481	99.5581
95.6075	99.8767	93.764	99.9358	94.9215	99.8903	94.2273	99.5572
95.6858	99.8766	93.8461	99.9352	95.0035	99.89	94.3052	99.5563
95.7637	99.8772	93.9274	99.9349	95.0849	99.8897	94.3843	99.5553
95.8417	99.8772	94.0083	99.9344	95.1668	99.8895	94.4661	99.5544
95.9211	99.8777	94.09	99.9342	95.2526	99.8892	94.5493	99.5534
96.0032	99.8781	94.1722	99.9338	95.3384	99.8889	94.6314	99.5525
96.0861	99.8781	94.255	99.9331	95.424	99.8886	94.715	99.5516
96.1693	99.8784	94.3374	99.933	95.5104	99.8884	94.7994	99.5506
96.253	99.8781	94.4208	99.9323	95.5958	99.8881	94.8818	99.5497
96.3371	99.8777	94.505	99.9318	95.6797	99.8878	94.9654	99.5487
96.4228	99.8774	94.5881	99.9311	95.7614	99.8875	95.0488	99.5478
96.5086	99.8767	94.6698	99.9303	95.8434	99.8872	95.1336	99.5469
96.5937	99.8769	94.7517	99.9293	95.9254	99.887	95.2175	99.5459
96.6761	99.8764	94.835	99.9288	96.0071	99.8867	95.302	99.545
96.7579	99.876	94.9202	99.9281	96.0869	99.8864	95.387	99.544
96.8385	99.8754	95.0071	99.9274	96.1674	99.8861	95.472	99.543
96.9182	99.8752	95.0939	99.9266	96.2476	99.8859	95.5584	99.5421
96.9989	99.8751	95.1796	99.9258	96.3276	99.8856	95.6447	99.5411
97.0789	99.8744	95.2645	99.9254	96.4075	99.8853	95.7305	99.5401
97.1595	99.8739	95.3491	99.9243	96.4866	99.885	95.8156	99.5392
97.2391	99.8736	95.4326	99.9236	96.5675	99.8847	95.9005	99.5382
97.3204	99.8732	95.5166	99.923	96.6485	99.8844	95.986	99.5372
97.4046	99.8726	95.6019	99.9224	96.7303	99.8841	96.0707	99.5362
97.4909	99.872	95.687	99.9219	96.8108	99.8838	96.1543	99.5353
97.577	99.8709	95.7708	99.9215	96.893	99.8835	96.2367	99.5343
97.6596	99.8706	95.8528	99.9207	96.975	99.8833	96.3189	99.5333
97.738	99.8705	95.9328	99.9202	97.058	99.883	96.4003	99.5323
97.8129	99.8702	96.0131	99.9193	97.1412	99.8827	96.4805	99.5313
97.8876	99.8695	96.0948	99.9177	97.2253	99.8824	96.562	99.5303
97.9658	99.8689	96.1774	99.9168	97.3112	99.8821	96.6453	99.5293
98.0474	99.8682	96.2606	99.9162	97.3965	99.8818	96.7293	99.5283
98.1294	99.8682	96.3448	99.9156	97.4802	99.8815	96.8126	99.5273
98.21	99.8681	96.4301	99.915	97.5615	99.8812	96.8936	99.5263
98.2919	99.8687	96.5142	99.9146	97.6433	99.8809	96.9725	99.5253
98.3736	99.8686	96.5981	99.9139	97.7246	99.8806	97.0536	99.5243
98.4553	99.8682	96.6824	99.9136	97.8058	99.8803	97.1357	99.5233
98.5392	99.868	96.7677	99.9134	97.8874	99.88	97.2186	99.5222
98.6239	99.8674	96.8529	99.9128	97.9686	99.8797	97.3021	99.5212
98.7127	99.867	96.938	99.9123	98.0496	99.8794	97.3858	99.5202
98.8012	99.8659	97.0222	99.9115	98.1302	99.8791	97.4691	99.5192
98.8863	99.8652	97.1063	99.911	98.2108	99.8787	97.5525	99.5181
98.9691	99.8652	97.1895	99.9106	98.2945	99.8784	97.6352	99.5171
99.0512	99.8644	97.2711	99.9104	98.3791	99.8781	97.7193	99.5161
99.132	99.8643	97.3531	99.91	98.4623	99.8778	97.8061	99.515
99.2133	99.8638	97.435	99.9097	98.5454	99.8775	97.8897	99.514
99.2972	99.8639	97.517	99.9092	98.6287	99.8772	97.9702	99.5129
99.3831	99.8638	97.599	99.9087	98.7108	99.8769	98.051	99.5119
99.4713	99.8634	97.6812	99.9084	98.7942	99.8766	98.1311	99.5108
99.5569	99.8637	97.7638	99.908	98.8769	99.8762	98.211	99.5098
99.6384	99.864	97.8481	99.9074	98.9577	99.8759	98.2902	99.5087
99.7205	99.8644	97.9304	99.907	99.0393	99.8756	98.3684	99.5076
99.803	99.8646	98.0128	99.9064	99.1208	99.8753	98.4461	99.5066
99.8868	99.8647	98.0954	99.906	99.2035	99.875	98.5255	99.5055
99.9703	99.8644	98.1782	99.9056	99.2883	99.8746	98.6076	99.5044
100.053	99.8649	98.2626	99.9047	99.3731	99.8743	98.691	99.5033
100.135	99.865	98.3471	99.9039	99.4569	99.874	98.7742	99.5023
100.215	99.8651	98.4303	99.9031	99.5408	99.8737	98.8553	99.5012
100.296	99.8653	98.5151	99.9024	99.6236	99.8733	98.9364	99.5001
100.379	99.8654	98.5982	99.9023	99.7053	99.873	99.0185	99.499
100.461	99.8662	98.6794	99.9025	99.7857	99.8727	99.1006	99.4979
100.543	99.8668	98.7599	99.9018	99.8654	99.8723	99.1846	99.4968
100.625	99.8666	98.8402	99.9012	99.945	99.872	99.2696	99.4956
100.707	99.8669	98.9213	99.9007	100.024	99.8717	99.3549	99.4945
100.786	99.8661	99.0026	99.8999	100.103	99.8713	99.4377	99.4934
100.868	99.8658	99.0812	99.8994	100.183	99.871	99.5201	99.4923
100.947	99.8658	99.1587	99.8987	100.263	99.8706	99.6036	99.4912
101.027	99.8655	99.2391	99.8978	100.344	99.8703	99.6894	99.49
101.108	99.8655	99.3187	99.8971	100.424	99.87	99.7748	99.4889
101.188	99.8656	99.399	99.8966	100.506	99.8696	99.8611	99.4878
101.27	99.8655	99.4801	99.8962	100.591	99.8693	99.9502	99.4866
101.353	99.8659	99.5652	99.8958	100.678	99.8689	100.038	99.4855
101.437	99.8653	99.6514	99.8952	100.764	99.8686	100.125	99.4843
101.521	99.8655	99.7367	99.8945	100.849	99.8682	100.213	99.4832
101.606	99.8655	99.8211	99.8938	100.933	99.8679	100.3	99.482
101.69	99.8656	99.9058	99.8929	101.017	99.8675	100.386	99.4808
101.774	99.8657	99.9915	99.8923	101.1	99.8672	100.473	99.4797
101.858	99.8653	100.075	99.8915	101.184	99.8668	100.557	99.4785
101.941	99.8652	100.158	99.8907	101.27	99.8664	100.642	99.4773
102.022	99.8652	100.243	99.8899	101.356	99.8661	100.725	99.4761
102.102	99.8643	100.328	99.8895	101.441	99.8657	100.803	99.4749
102.181	99.8633	100.41	99.8888	101.526	99.8654	100.881	99.4737
102.258	99.8627	100.491	99.8881	101.61	99.865	100.957	99.4725
102.337	99.8619	100.572	99.8877	101.694	99.8646	101.034	99.4713
102.416	99.8611	100.653	99.887	101.778	99.8642	101.112	99.4701
102.495	99.8608	100.736	99.8863	101.862	99.8639	101.191	99.4689
102.575	99.8604	100.818	99.8858	101.945	99.8635	101.27	99.4677
102.657	99.8598	100.903	99.8851	102.026	99.8631	101.35	99.4664
102.739	99.8589	100.986	99.8846	102.105	99.8628	101.428	99.4652
102.821	99.8584	101.068	99.8843	102.183	99.8624	101.507	99.464
102.902	99.8575	101.15	99.8835	102.264	99.862	101.591	99.4627
102.982	99.8569	101.232	99.8826	102.346	99.8616	101.675	99.4615
103.063	99.8564	101.316	99.8819	102.428	99.8612	101.76	99.4602
103.144	99.8556	101.401	99.8815	102.51	99.8608	101.845	99.459
103.225	99.8547	101.489	99.881	102.591	99.8605	101.93	99.4577
103.31	99.8543	101.576	99.8805	102.671	99.8601	102.014	99.4564
103.398	99.8543	101.662	99.8795	102.753	99.8597	102.098	99.4552
103.485	99.8549	101.746	99.8789	102.836	99.8593	102.181	99.4539
103.573	99.855	101.83	99.8786	102.92	99.8589	102.267	99.4526
103.661	99.8548	101.915	99.8778	103.005	99.8585	102.352	99.4513
103.75	99.8544	101.999	99.8771	103.086	99.8581	102.437	99.45
103.839	99.8543	102.084	99.8763	103.166	99.8577	102.522	99.4488
103.926	99.8542	102.167	99.8755	103.244	99.8573	102.608	99.4475
104.01	99.8545	102.248	99.8745	103.323	99.8569	102.693	99.4462
104.094	99.8542	102.328	99.8737	103.403	99.8565	102.778	99.4448
104.175	99.8544	102.409	99.8729	103.485	99.8561	102.863	99.4435
104.252	99.8544	102.489	99.8723	103.568	99.8557	102.948	99.4422
104.33	99.854	102.571	99.8714	103.651	99.8553	103.035	99.4409
104.406	99.8549	102.655	99.8708	103.735	99.8549	103.118	99.4396
104.482	99.8549	102.738	99.8702	103.821	99.8545	103.203	99.4382
104.563	99.8543	102.82	99.8694	103.907	99.8541	103.287	99.4369
104.646	99.854	102.904	99.8685	103.994	99.8537	103.37	99.4355
104.731	99.8536	102.989	99.8675	104.08	99.8532	103.452	99.4342
104.819	99.8534	103.074	99.8666	104.164	99.8528	103.533	99.4328
104.905	99.8536	103.159	99.8658	104.247	99.8524	103.614	99.4315
104.991	99.8534	103.244	99.8649	104.331	99.852	103.694	99.4301
105.076	99.8526	103.329	99.8639	104.416	99.8516	103.774	99.4287
105.16	99.8521	103.414	99.8627	104.499	99.8512	103.854	99.4274
105.245	99.8516	103.498	99.8618	104.581	99.8507	103.935	99.426
105.33	99.8511	103.584	99.8608	104.662	99.8503	104.017	99.4246
105.412	99.8511	103.671	99.8599	104.744	99.8499	104.1	99.4232
105.492	99.8501	103.758	99.8594	104.825	99.8495	104.183	99.4218
105.572	99.8497	103.843	99.8587	104.909	99.849	104.265	99.4204
105.652	99.85	103.93	99.8579	104.994	99.8486	104.348	99.419
105.732	99.85	104.016	99.8573	105.078	99.8482	104.432	99.4176
105.813	99.8496	104.102	99.8564	105.161	99.8477	104.517	99.4162
105.897	99.8493	104.186	99.8555	105.244	99.8473	104.601	99.4148
105.982	99.8487	104.271	99.8547	105.326	99.8468	104.684	99.4134
106.068	99.8487	104.356	99.8536	105.407	99.8464	104.767	99.4119
106.154	99.8488	104.44	99.8527	105.489	99.846	104.848	99.4105
106.239	99.8485	104.523	99.8518	105.57	99.8455	104.929	99.409
106.324	99.8482	104.606	99.8508	105.65	99.8451	105.01	99.4076
106.409	99.8482	104.688	99.85	105.73	99.8446	105.091	99.4061
106.493	99.8483	104.77	99.8496	105.809	99.8441	105.173	99.4047
106.576	99.8484	104.853	99.8492	105.889	99.8437	105.253	99.4032
106.659	99.848	104.934	99.8483	105.972	99.8432	105.336	99.4017
106.741	99.8478	105.015	99.8476	106.054	99.8428	105.419	99.4003
106.824	99.8479	105.097	99.8469	106.136	99.8423	105.504	99.3988
106.907	99.8472	105.179	99.846	106.217	99.8419	105.589	99.3973
106.989	99.8469	105.262	99.845	106.296	99.8414	105.675	99.3958
107.07	99.8468	105.344	99.8441	106.377	99.8409	105.762	99.3943
107.151	99.8463	105.426	99.8434	106.459	99.8405	105.85	99.3928
107.232	99.8463	105.508	99.8425	106.54	99.84	105.937	99.3913
107.315	99.8465	105.589	99.8422	106.624	99.8395	106.023	99.3898
107.399	99.8471	105.67	99.8417	106.708	99.839	106.108	99.3883
107.482	99.8471	105.751	99.8413	106.79	99.8385	106.188	99.3867
107.564	99.8473	105.833	99.8407	106.872	99.8381	106.267	99.3852
107.645	99.8476	105.913	99.8399	106.952	99.8376	106.346	99.3837
107.725	99.848	105.992	99.8393	107.034	99.8371	106.426	99.3821
107.807	99.8483	106.071	99.8387	107.117	99.8366	106.508	99.3806
107.889	99.848	106.152	99.8382	107.199	99.8361	106.59	99.379
107.973	99.8484	106.236	99.8372	107.28	99.8357	106.671	99.3774
108.056	99.849	106.322	99.836	107.363	99.8352	106.752	99.3759
108.141	99.8485	106.409	99.8352	107.447	99.8347	106.833	99.3743
108.226	99.8478	106.496	99.8341	107.529	99.8342	106.914	99.3727
108.309	99.8475	106.583	99.8332	107.612	99.8337	107	99.3712
108.39	99.8475	106.671	99.8321	107.695	99.8332	107.087	99.3696
108.475	99.8476	106.759	99.8311	107.779	99.8327	107.172	99.368
108.562	99.8468	106.847	99.83	107.863	99.8322	107.255	99.3664
108.646	99.8457	106.935	99.8293	107.946	99.8317	107.338	99.3648
108.727	99.8451	107.022	99.8284	108.031	99.8312	107.418	99.3631
108.807	99.8446	107.107	99.8277	108.117	99.8307	107.498	99.3615
108.885	99.8442	107.19	99.827	108.2	99.8302	107.578	99.3599
108.964	99.8441	107.273	99.8262	108.283	99.8297	107.66	99.3583
109.045	99.8435	107.355	99.825	108.366	99.8291	107.743	99.3566
109.129	99.8421	107.436	99.824	108.449	99.8286	107.825	99.355
109.216	99.8416	107.518	99.8231	108.532	99.8281	107.904	99.3534
109.301	99.8411	107.601	99.8222	108.617	99.8276	107.986	99.3517
109.383	99.8409	107.684	99.8212	108.7	99.8271	108.07	99.35
109.465	99.8409	107.768	99.8202	108.784	99.8266	108.154	99.3484
109.549	99.8405	107.851	99.8191	108.867	99.826	108.237	99.3467
109.636	99.8403	107.933	99.8183	108.952	99.8255	108.324	99.345
109.725	99.8403	108.014	99.8173	109.037	99.825	108.411	99.3434
109.812	99.8402	108.095	99.8164	109.123	99.8245	108.497	99.3417
109.897	99.8402	108.177	99.8151	109.208	99.8239	108.586	99.34
109.979	99.8397	108.261	99.8138	109.292	99.8234	108.675	99.3383
110.063	99.8399	108.345	99.8124	109.376	99.8229	108.765	99.3366
110.147	99.8397	108.426	99.8112	109.459	99.8224	108.853	99.3349
110.233	99.8394	108.507	99.8102	109.541	99.8218	108.938	99.3332
110.319	99.8394	108.589	99.8092	109.624	99.8213	109.022	99.3315
110.406	99.8391	108.67	99.8082	109.707	99.8208	109.106	99.3297
110.493	99.8394	108.752	99.8071	109.79	99.8202	109.19	99.328
110.579	99.8391	108.835	99.806	109.87	99.8197	109.275	99.3263
110.664	99.8392	108.918	99.8053	109.95	99.8191	109.359	99.3245
110.749	99.839	109.003	99.8043	110.032	99.8186	109.44	99.3228
110.832	99.839	109.087	99.8033	110.115	99.818	109.521	99.321
110.914	99.839	109.17	99.8022	110.198	99.8175	109.602	99.3193
110.995	99.8391	109.255	99.801	110.281	99.8169	109.685	99.3175
111.074	99.8387	109.342	99.8002	110.365	99.8164	109.77	99.3157
111.155	99.8389	109.429	99.7991	110.449	99.8158	109.856	99.3139
111.237	99.8391	109.514	99.7982	110.532	99.8153	109.941	99.3122
111.32	99.8391	109.599	99.7971	110.613	99.8147	110.027	99.3103
111.402	99.8395	109.682	99.7959	110.692	99.8142	110.11	99.3085
111.483	99.8391	109.764	99.7947	110.772	99.8136	110.193	99.3067
111.563	99.8387	109.846	99.7936	110.85	99.813	110.277	99.3049
111.645	99.8392	109.928	99.7922	110.93	99.8125	110.362	99.3031
111.728	99.8394	110.012	99.7911	111.012	99.8119	110.447	99.3013
111.812	99.8393	110.095	99.7899	111.094	99.8113	110.533	99.2994
111.896	99.8393	110.178	99.7888	111.174	99.8108	110.617	99.2976
111.978	99.8383	110.262	99.7875	111.254	99.8102	110.699	99.2957
112.06	99.8382	110.347	99.7863	111.335	99.8096	110.781	99.2939
112.143	99.8378	110.431	99.7851	111.416	99.809	110.862	99.292
112.226	99.8379	110.518	99.784	111.499	99.8084	110.941	99.2902
112.311	99.8376	110.606	99.7828	111.583	99.8079	111.021	99.2883
112.398	99.8366	110.692	99.7818	111.667	99.8073	111.101	99.2864
112.483	99.8357	110.776	99.7808	111.751	99.8067	111.18	99.2845
112.567	99.8354	110.859	99.7796	111.833	99.8061	111.259	99.2826
112.65	99.835	110.942	99.7786	111.916	99.8055	111.338	99.2807
112.733	99.8345	111.025	99.7774	111.999	99.8049	111.417	99.2788
112.815	99.8342	111.107	99.7763	112.082	99.8043	111.497	99.2769
112.895	99.8338	111.189	99.7751	112.166	99.8037	111.579	99.275
112.973	99.8335	111.273	99.7738	112.252	99.8031	111.662	99.273
113.048	99.8332	111.356	99.7726	112.338	99.8025	111.746	99.2711
113.127	99.8326	111.439	99.7712	112.424	99.8019	111.828	99.2691
113.205	99.8319	111.523	99.7699	112.509	99.8012	111.912	99.2672
113.286	99.8315	111.608	99.7685	112.594	99.8006	111.996	99.2652
113.367	99.8314	111.694	99.7673	112.68	99.8	112.08	99.2632
113.45	99.8311	111.78	99.7665	112.766	99.7994	112.163	99.2613
113.533	99.8311	111.866	99.7656	112.853	99.7988	112.247	99.2593
113.617	99.8307	111.951	99.7643	112.939	99.7981	112.332	99.2573
113.699	99.8302	112.035	99.763	113.025	99.7975	112.416	99.2553
113.784	99.8303	112.12	99.7618	113.109	99.7969	112.503	99.2533
113.869	99.8293	112.202	99.7605	113.193	99.7962	112.591	99.2513
113.956	99.8289	112.285	99.7598	113.279	99.7956	112.679	99.2493
114.041	99.8291	112.367	99.7585	113.365	99.795	112.766	99.2472
114.126	99.829	112.45	99.7575	113.448	99.7943	112.851	99.2452
114.21	99.8286	112.532	99.7561	113.529	99.7937	112.936	99.2432
114.292	99.8289	112.614	99.7549	113.609	99.793	113.02	99.2411
114.374	99.8288	112.698	99.7537	113.692	99.7924	113.103	99.2391
114.455	99.8288	112.781	99.7528	113.775	99.7917	113.186	99.237
114.539	99.8293	112.865	99.7517	113.859	99.7911	113.268	99.2349
114.624	99.8295	112.948	99.7505	113.943	99.7904	113.349	99.2329
114.71	99.8291	113.033	99.7491	114.028	99.7898	113.428	99.2308
114.794	99.8286	113.119	99.748	114.111	99.7891	113.51	99.2287
114.878	99.8284	113.204	99.7469	114.193	99.7884	113.594	99.2266
114.963	99.8285	113.289	99.7457	114.276	99.7878	113.677	99.2245
115.047	99.8289	113.375	99.7446	114.362	99.7871	113.761	99.2224
115.132	99.829	113.461	99.7434	114.448	99.7865	113.844	99.2203
115.216	99.8291	113.545	99.7422	114.533	99.7858	113.926	99.2181
115.3	99.8286	113.629	99.7409	114.618	99.7851	114.01	99.216
115.386	99.8283	113.713	99.7395	114.703	99.7845	114.094	99.2139
115.471	99.8284	113.797	99.7383	114.789	99.7838	114.176	99.2117
115.555	99.8283	113.881	99.7368	114.873	99.7831	114.26	99.2096
115.64	99.8281	113.966	99.7357	114.957	99.7824	114.343	99.2074
115.722	99.8284	114.052	99.7346	115.041	99.7817	114.426	99.2052
115.803	99.8282	114.136	99.7337	115.122	99.7811	114.51	99.203
115.884	99.8278	114.221	99.7326	115.202	99.7804	114.596	99.2009
115.965	99.828	114.305	99.7314	115.282	99.7797	114.682	99.1987
116.048	99.8278	114.39	99.7301	115.362	99.779	114.768	99.1964
116.131	99.8281	114.477	99.7287	115.441	99.7783	114.854	99.1942
116.212	99.8279	114.564	99.7274	115.52	99.7776	114.94	99.192
116.292	99.8274	114.65	99.7261	115.6	99.7769	115.026	99.1898
116.372	99.8277	114.737	99.7247	115.681	99.7762	115.111	99.1876
116.452	99.8279	114.822	99.7237	115.761	99.7755	115.195	99.1853
116.536	99.8281	114.907	99.7222	115.844	99.7748	115.278	99.183
116.622	99.8284	114.992	99.7211	115.93	99.7741	115.36	99.1808
116.709	99.8279	115.074	99.72	116.017	99.7734	115.443	99.1785
116.796	99.8274	115.156	99.719	116.102	99.7727	115.528	99.1762
116.884	99.827	115.238	99.7179	116.186	99.772	115.615	99.174
116.973	99.8266	115.32	99.7166	116.27	99.7713	115.703	99.1717
117.061	99.8268	115.401	99.7155	116.355	99.7706	115.791	99.1694
117.15	99.8264	115.483	99.7144	116.44	99.7699	115.88	99.1671
117.238	99.8263	115.562	99.7132	116.525	99.7692	115.97	99.1647
117.327	99.826	115.642	99.7119	116.613	99.7685	116.06	99.1624
117.413	99.826	115.723	99.7108	116.699	99.7677	116.151	99.1601
117.495	99.8262	115.804	99.7094	116.783	99.767	116.24	99.1577
117.58	99.826	115.887	99.7082	116.868	99.7663	116.329	99.1554
117.665	99.8256	115.971	99.7071	116.953	99.7656	116.415	99.153
117.749	99.825	116.055	99.706	117.041	99.7648	116.501	99.1506
117.831	99.8251	116.139	99.7047	117.129	99.7641	116.586	99.1483
117.914	99.8249	116.223	99.7034	117.215	99.7634	116.67	99.1459
117.997	99.8247	116.308	99.7022	117.298	99.7626	116.754	99.1435
118.081	99.8242	116.393	99.701	117.38	99.7619	116.837	99.1411
118.163	99.8241	116.479	99.6998	117.46	99.7612	116.919	99.1387
118.246	99.8235	116.565	99.6986	117.541	99.7604	117	99.1363
118.33	99.823	116.652	99.6975	117.622	99.7596	117.083	99.1338
118.412	99.823	116.74	99.696	117.705	99.7589	117.164	99.1314
118.492	99.8228	116.827	99.6946	117.787	99.7582	117.245	99.1289
118.574	99.8224	116.915	99.6933	117.868	99.7574	117.325	99.1265
118.658	99.8216	117.001	99.6921	117.948	99.7566	117.405	99.124
118.742	99.8212	117.086	99.6908	118.029	99.7559	117.485	99.1215
118.827	99.821	117.17	99.6896	118.114	99.7551	117.567	99.1191
118.912	99.8207	117.253	99.6883	118.199	99.7543	117.648	99.1166
118.997	99.8204	117.337	99.6869	118.282	99.7536	117.731	99.1141
119.084	99.8194	117.42	99.6856	118.364	99.7528	117.815	99.1116
119.17	99.8186	117.503	99.6844	118.444	99.752	117.9	99.1091
119.256	99.8179	117.584	99.6829	118.527	99.7512	117.986	99.1065
119.343	99.8177	117.665	99.6815	118.611	99.7504	118.072	99.104
119.428	99.8174	117.745	99.68	118.696	99.7497	118.158	99.1015
119.511	99.8173	117.825	99.6785	118.778	99.7489	118.243	99.0989
119.594	99.8166	117.908	99.6771	118.862	99.7481	118.328	99.0964
119.675	99.8157	117.99	99.6757	118.945	99.7473	118.412	99.0938
119.756	99.8151	118.074	99.6741	119.03	99.7465	118.497	99.0912
119.837	99.8147	118.16	99.6727	119.116	99.7456	118.58	99.0887
119.918	99.8147	118.247	99.6712	119.202	99.7448	118.662	99.0861
120.001	99.8138	118.334	99.6699	119.29	99.744	118.745	99.0835
120.085	99.8134	118.42	99.6684	119.375	99.7432	118.828	99.0808
120.17	99.8134	118.507	99.667	119.455	99.7424	118.913	99.0782
120.253	99.8133	118.595	99.6654	119.535	99.7416	118.998	99.0756
120.335	99.8132	118.684	99.6638	119.619	99.7408	119.084	99.073
120.417	99.8134	118.771	99.6626	119.703	99.7399	119.169	99.0703
120.5	99.8124	118.856	99.6609	119.785	99.7391	119.252	99.0677
120.583	99.8117	118.941	99.6597	119.866	99.7383	119.336	99.065
120.667	99.8112	119.025	99.6582	119.947	99.7375	119.42	99.0623
120.753	99.8115	119.108	99.6567	120.029	99.7366	119.505	99.0596
120.837	99.812	119.191	99.6554	120.111	99.7358	119.588	99.0569
120.919	99.8122	119.274	99.6539	120.193	99.7349	119.67	99.0542
121.001	99.8122	119.356	99.6523	120.277	99.7341	119.752	99.0515
121.084	99.8121	119.438	99.6507	120.363	99.7333	119.833	99.0488
121.169	99.8118	119.521	99.6495	120.449	99.7324	119.914	99.046
121.256	99.8116	119.608	99.6482	120.534	99.7316	119.998	99.0433
121.345	99.8114	119.695	99.6466	120.618	99.7307	120.083	99.0405
121.435	99.8115	119.782	99.6453	120.702	99.7299	120.169	99.0377
121.525	99.811	119.868	99.6442	120.784	99.729	120.253	99.0349
121.612	99.8108	119.953	99.6429	120.867	99.7281	120.339	99.0322
121.698	99.8105	120.038	99.6416	120.951	99.7273	120.425	99.0293
121.785	99.8105	120.124	99.6401	121.036	99.7264	120.511	99.0265
121.87	99.8106	120.209	99.6386	121.124	99.7255	120.596	99.0237
121.955	99.8106	120.294	99.6371	121.21	99.7247	120.683	99.0209
122.039	99.8103	120.378	99.6356	121.294	99.7238	120.77	99.018
122.123	99.8106	120.462	99.6342	121.379	99.7229	120.856	99.0152
122.206	99.8104	120.547	99.6327	121.465	99.7221	120.942	99.0123
122.287	99.8106	120.634	99.6312	121.551	99.7212	121.028	99.0095
122.367	99.8106	120.722	99.6298	121.637	99.7203	121.113	99.0066
122.447	99.8105	120.81	99.6284	121.723	99.7194	121.199	99.0037
122.527	99.8103	120.898	99.6269	121.808	99.7186	121.283	99.0008
122.607	99.8101	120.984	99.6256	121.893	99.7177	121.368	98.9979
122.687	99.8099	121.072	99.6239	121.975	99.7168	121.452	98.9949
122.768	99.8097	121.16	99.6224	122.058	99.7159	121.534	98.992
122.849	99.8097	121.246	99.6209	122.144	99.715	121.614	98.9891
122.93	99.8097	121.33	99.6197	122.229	99.7141	121.694	98.9861
123.012	99.8098	121.411	99.6185	122.312	99.7132	121.775	98.9832
123.094	99.8093	121.491	99.6168	122.396	99.7124	121.857	98.9802
123.177	99.8095	121.571	99.6156	122.48	99.7115	121.939	98.9772
123.262	99.8094	121.652	99.614	122.565	99.7106	122.02	98.9742
123.349	99.8091	121.733	99.612	122.651	99.7097	122.101	98.9712
123.438	99.8092	121.817	99.6102	122.735	99.7088	122.184	98.9682
123.527	99.8089	121.899	99.6086	122.819	99.7078	122.268	98.9652
123.617	99.8086	121.98	99.6069	122.903	99.7069	122.354	98.9622
123.707	99.8084	122.061	99.6051	122.986	99.706	122.44	98.9592
123.795	99.8081	122.144	99.6034	123.068	99.7051	122.526	98.9561
123.882	99.8081	122.228	99.6018	123.15	99.7042	122.612	98.9531
123.969	99.8079	122.312	99.6003	123.235	99.7033	122.697	98.95
124.054	99.808	122.397	99.5987	123.32	99.7024	122.782	98.947
124.136	99.8076	122.481	99.597	123.406	99.7014	122.867	98.9439
124.217	99.8072	122.566	99.5952	123.494	99.7005	122.951	98.9408
124.297	99.807	122.65	99.5932	123.581	99.6996	123.035	98.9377
124.377	99.8072	122.735	99.5915	123.668	99.6987	123.118	98.9346
124.458	99.8067	122.821	99.5897	123.754	99.6977	123.201	98.9315
124.54	99.8063	122.908	99.5878	123.839	99.6968	123.282	98.9284
124.621	99.8054	122.997	99.5862	123.923	99.6959	123.362	98.9253
124.701	99.8051	123.086	99.5844	124.006	99.6949	123.445	98.9222
124.783	99.805	123.174	99.5828	124.089	99.694	123.528	98.919
124.867	99.8045	123.26	99.581	124.171	99.693	123.611	98.9159
124.954	99.8042	123.345	99.5791	124.252	99.6921	123.695	98.9127
125.042	99.8043	123.429	99.5772	124.33	99.6911	123.778	98.9095
125.129	99.804	123.51	99.5751	124.41	99.6902	123.861	98.9064
125.215	99.8037	123.591	99.5737	124.492	99.6892	123.944	98.9032
125.298	99.8034	123.672	99.5721	124.575	99.6882	124.028	98.9
125.381	99.8033	123.752	99.5705	124.659	99.6873	124.114	98.8968
125.465	99.8032	123.832	99.5687	124.746	99.6863	124.199	98.8936
125.549	99.8027	123.912	99.5669	124.834	99.6853	124.283	98.8904
125.633	99.8024	123.993	99.565	124.92	99.6843	124.367	98.8872
125.717	99.802	124.076	99.5632	125.005	99.6834	124.45	98.8839
125.802	99.8017	124.161	99.5614	125.092	99.6824	124.534	98.8807
125.886	99.8016	124.245	99.5596	125.177	99.6814	124.616	98.8774
125.972	99.801	124.334	99.5579	125.261	99.6804	124.7	98.8742
126.058	99.8004	124.424	99.5563	125.343	99.6794	124.784	98.8709
126.145	99.8001	124.514	99.5546	125.425	99.6785	124.868	98.8676
126.229	99.7998	124.603	99.5527	125.508	99.6775	124.953	98.8644
126.312	99.7996	124.693	99.551	125.591	99.6765	125.039	98.8611
126.395	99.7993	124.782	99.5492	125.674	99.6755	125.126	98.8578
126.48	99.7992	124.87	99.5475	125.759	99.6745	125.213	98.8545
126.565	99.799	124.956	99.5457	125.844	99.6735	125.3	98.8512
126.649	99.7987	125.04	99.5438	125.929	99.6725	125.387	98.8478
126.732	99.7986	125.126	99.542	126.014	99.6715	125.474	98.8445
126.813	99.7986	125.211	99.5403	126.1	99.6705	125.561	98.8412
126.894	99.798	125.294	99.5386	126.187	99.6695	125.649	98.8378
126.977	99.7982	125.375	99.5368	126.273	99.6685	125.736	98.8345
127.064	99.7976	125.457	99.5353	126.358	99.6675	125.822	98.8311
127.154	99.7973	125.539	99.5333	126.442	99.6664	125.908	98.8278
127.243	99.7969	125.62	99.5314	126.525	99.6654	125.995	98.8244
127.329	99.7963	125.702	99.5297	126.608	99.6644	126.082	98.821
127.415	99.7957	125.784	99.5279	126.692	99.6634	126.167	98.8176
127.498	99.7952	125.868	99.5264	126.777	99.6624	126.252	98.8142
127.582	99.7947	125.953	99.5247	126.864	99.6613	126.338	98.8108
127.667	99.7943	126.037	99.5229	126.949	99.6603	126.423	98.8074
127.751	99.7941	126.123	99.5213	127.035	99.6593	126.507	98.804
127.835	99.7938	126.21	99.5194	127.121	99.6583	126.589	98.8005
127.919	99.7936	126.297	99.5174	127.206	99.6572	126.671	98.7971
128.002	99.7931	126.385	99.5149	127.289	99.6562	126.753	98.7937
128.085	99.7927	126.474	99.5125	127.372	99.6552	126.836	98.7902
128.168	99.7922	126.563	99.5107	127.457	99.6541	126.917	98.7868
128.251	99.792	126.652	99.5084	127.542	99.6531	127	98.7833
128.335	99.7915	126.739	99.5063	127.627	99.652	127.083	98.7798
128.419	99.7909	126.826	99.5045	127.71	99.651	127.168	98.7763
128.503	99.7906	126.911	99.5025	127.795	99.6499	127.253	98.7729
128.587	99.7901	126.995	99.5005	127.88	99.6489	127.341	98.7694
128.673	99.7897	127.08	99.4986	127.968	99.6478	127.43	98.7659
128.759	99.7897	127.163	99.4968	128.057	99.6467	127.518	98.7624
128.844	99.7895	127.245	99.4949	128.148	99.6457	127.606	98.7588
128.932	99.7892	127.327	99.4927	128.237	99.6446	127.692	98.7553
129.021	99.7889	127.409	99.4906	128.325	99.6436	127.78	98.7518
129.108	99.7884	127.491	99.4883	128.409	99.6425	127.869	98.7483
129.195	99.7875	127.574	99.4861	128.491	99.6414	127.957	98.7447
129.281	99.7866	127.658	99.4841	128.572	99.6404	128.045	98.7412
129.367	99.7865	127.743	99.4821	128.654	99.6393	128.131	98.7376
129.452	99.7862	127.83	99.4799	128.735	99.6382	128.215	98.734
129.535	99.7857	127.913	99.4777	128.816	99.6372	128.3	98.7305
129.616	99.7854	128	99.4757	128.897	99.6361	128.384	98.7269
129.7	99.7853	128.086	99.4741	128.976	99.635	128.467	98.7233
129.781	99.7849	128.173	99.4722	129.057	99.6339	128.549	98.7197
129.861	99.7854	128.26	99.4701	129.141	99.6329	128.629	98.7161
129.944	99.7854	128.345	99.468	129.228	99.6318	128.708	98.7125
130.03	99.785	128.43	99.4657	129.317	99.6307	128.788	98.7089
130.116	99.7845	128.515	99.4635	129.406	99.6296	128.869	98.7053
130.203	99.7842	128.598	99.4614	129.494	99.6286	128.95	98.7017
130.292	99.7838	128.682	99.4593	129.583	99.6275	129.032	98.698
130.384	99.7832	128.767	99.4571	129.67	99.6264	129.113	98.6944
130.476	99.7828	128.852	99.4552	129.758	99.6253	129.195	98.6908
130.565	99.7826	128.937	99.4534	129.845	99.6242	129.28	98.6871
130.653	99.7822	129.022	99.4518	129.93	99.6232	129.367	98.6835
130.741	99.7819	129.105	99.4501	130.013	99.6221	129.456	98.6798
130.826	99.7817	129.188	99.4483	130.095	99.621	129.544	98.6762
130.908	99.7816	129.273	99.4466	130.179	99.6199	129.631	98.6725
130.989	99.7813	129.359	99.4445	130.263	99.6188	129.718	98.6688
131.07	99.7811	129.445	99.4427	130.348	99.6178	129.805	98.6651
131.152	99.7809	129.531	99.4407	130.432	99.6167	129.892	98.6615
131.233	99.7804	129.617	99.4386	130.514	99.6156	129.978	98.6578
131.315	99.78	129.701	99.4365	130.595	99.6145	130.064	98.6541
131.396	99.7798	129.785	99.4344	130.677	99.6135	130.147	98.6504
131.478	99.7799	129.87	99.4326	130.76	99.6124	130.227	98.6467
131.562	99.7798	129.957	99.4308	130.843	99.6113	130.308	98.643
131.646	99.7793	130.044	99.4291	130.927	99.6102	130.391	98.6393
131.73	99.779	130.132	99.4272	131.008	99.6092	130.474	98.6356
131.814	99.7786	130.217	99.4252	131.091	99.6081	130.557	98.6319
131.899	99.7783	130.301	99.4231	131.172	99.607	130.638	98.6281
131.982	99.7783	130.384	99.4214	131.254	99.606	130.719	98.6244
132.064	99.7783	130.467	99.4195	131.338	99.6049	130.801	98.6207
132.146	99.7777	130.552	99.4172	131.424	99.6038	130.885	98.6169
132.23	99.7768	130.637	99.4151	131.51	99.6028	130.97	98.6132
132.317	99.7772	130.722	99.4129	131.595	99.6017	131.057	98.6094
132.405	99.7769	130.807	99.4109	131.681	99.6006	131.143	98.6057
132.493	99.7764	130.891	99.409	131.766	99.5995	131.228	98.6019
132.583	99.7765	130.977	99.4072	131.851	99.5985	131.312	98.5982
132.673	99.7762	131.062	99.4051	131.936	99.5974	131.396	98.5944
132.762	99.7759	131.148	99.4032	132.024	99.5964	131.481	98.5906
132.849	99.776	131.234	99.4009	132.113	99.5953	131.566	98.5868
132.934	99.776	131.321	99.3986	132.2	99.5942	131.651	98.583
133.019	99.776	131.405	99.3966	132.287	99.5932	131.736	98.5792
133.102	99.7758	131.49	99.3943	132.374	99.5921	131.821	98.5754
133.184	99.7754	131.575	99.3921	132.462	99.591	131.906	98.5715
133.266	99.7746	131.659	99.3898	132.55	99.59	131.99	98.5677
133.347	99.7739	131.743	99.3878	132.638	99.5889	132.075	98.5638
133.43	99.7735	131.827	99.3855	132.728	99.5879	132.159	98.56
133.514	99.7733	131.911	99.3834	132.814	99.5868	132.245	98.5561
133.598	99.773	131.996	99.3811	132.896	99.5857	132.331	98.5522
133.684	99.7722	132.081	99.3788	132.977	99.5847	132.418	98.5483
133.771	99.7717	132.166	99.3764	133.062	99.5836	132.504	98.5445
133.859	99.7714	132.253	99.3743	133.145	99.5825	132.591	98.5406
133.946	99.7713	132.338	99.3721	133.226	99.5815	132.679	98.5366
134.035	99.771	132.423	99.3697	133.309	99.5804	132.767	98.5327
134.12	99.7702	132.509	99.3672	133.391	99.5794	132.855	98.5288
134.207	99.7697	132.595	99.3649	133.474	99.5783	132.942	98.5249
134.293	99.7697	132.682	99.3626	133.557	99.5772	133.029	98.521
134.378	99.7696	132.77	99.3605	133.64	99.5762	133.114	98.517
134.463	99.7696	132.858	99.3584	133.725	99.5751	133.2	98.5131
134.55	99.77	132.946	99.3562	133.81	99.574	133.285	98.5092
134.637	99.7698	133.034	99.3537	133.893	99.573	133.37	98.5053
134.725	99.7692	133.122	99.3514	133.976	99.5719	133.455	98.5013
134.813	99.7693	133.209	99.3492	134.06	99.5709	133.541	98.4974
134.901	99.7686	133.296	99.3471	134.144	99.5698	133.626	98.4935
134.989	99.7682	133.382	99.3449	134.229	99.5688	133.711	98.4896
135.074	99.7681	133.468	99.3427	134.313	99.5677	133.796	98.4856
135.156	99.7677	133.553	99.3402	134.398	99.5667	133.882	98.4817
135.235	99.7675	133.638	99.3378	134.483	99.5656	133.968	98.4778
135.314	99.767	133.721	99.3353	134.57	99.5646	134.053	98.4739
135.393	99.7666	133.803	99.3329	134.656	99.5635	134.138	98.47
135.474	99.7666	133.885	99.3305	134.743	99.5625	134.222	98.4661
135.554	99.7662	133.966	99.3281	134.83	99.5614	134.305	98.4622
135.634	99.7663	134.048	99.3259	134.917	99.5604	134.388	98.4583
135.715	99.7658	134.132	99.3236	135.002	99.5593	134.471	98.4544
135.797	99.7659	134.216	99.3212	135.083	99.5583	134.554	98.4506
135.879	99.7655	134.301	99.319	135.165	99.5572	134.637	98.4467
135.963	99.7651	134.385	99.3169	135.246	99.5562	134.72	98.4429
136.049	99.7654	134.47	99.3145	135.327	99.5552	134.802	98.439
136.138	99.7651	134.556	99.3122	135.41	99.5541	134.884	98.4352
136.225	99.7644	134.641	99.3098	135.493	99.5531	134.966	98.4313
136.31	99.7639	134.726	99.3075	135.578	99.5521	135.048	98.4275
136.396	99.7635	134.813	99.3052	135.663	99.5511	135.132	98.4237
136.481	99.763	134.899	99.3029	135.747	99.55	135.215	98.4199
136.565	99.7624	134.985	99.3002	135.833	99.549	135.297	98.4161
136.649	99.762	135.07	99.298	135.921	99.548	135.379	98.4123
136.736	99.7615	135.156	99.2959	136.007	99.547	135.463	98.4085
136.823	99.7612	135.243	99.2935	136.094	99.546	135.548	98.4047
136.909	99.7605	135.328	99.2912	136.18	99.545	135.637	98.4009
136.995	99.7596	135.413	99.2885	136.266	99.544	135.726	98.3971
137.081	99.7588	135.5	99.2861	136.35	99.543	135.814	98.3933
137.168	99.758	135.585	99.2836	136.433	99.5419	135.902	98.3895
137.255	99.7574	135.67	99.2813	136.515	99.541	135.989	98.3857
137.342	99.7562	135.756	99.2788	136.598	99.54	136.076	98.382
137.429	99.7556	135.842	99.2763	136.683	99.539	136.165	98.3782
137.514	99.7551	135.927	99.2737	136.768	99.538	136.253	98.3744
137.598	99.7544	136.01	99.2711	136.856	99.537	136.339	98.3706
137.681	99.7538	136.091	99.2686	136.944	99.536	136.425	98.3668
137.765	99.7532	136.174	99.2663	137.033	99.535	136.51	98.3629
137.848	99.7523	136.258	99.2639	137.121	99.5341	136.594	98.3591
137.931	99.7519	136.343	99.2615	137.208	99.5331	136.677	98.3553
138.014	99.7509	136.43	99.2588	137.294	99.5321	136.761	98.3515
138.097	99.7502	136.517	99.2564	137.379	99.5311	136.843	98.3477
138.178	99.7487	136.602	99.254	137.465	99.5302	136.927	98.3439
138.259	99.7479	136.686	99.2518	137.549	99.5292	137.01	98.3401
138.342	99.7468	136.77	99.2496	137.634	99.5282	137.093	98.3362
138.426	99.7465	136.855	99.2472	137.718	99.5273	137.176	98.3324
138.511	99.7461	136.94	99.2446	137.802	99.5263	137.26	98.3285
138.596	99.7455	137.024	99.2421	137.885	99.5254	137.341	98.3247
138.681	99.7448	137.11	99.2399	137.966	99.5244	137.421	98.3208
138.766	99.7447	137.195	99.2377	138.049	99.5235	137.504	98.317
138.85	99.7439	137.279	99.2353	138.133	99.5225	137.59	98.3131
138.935	99.7436	137.361	99.2329	138.218	99.5216	137.674	98.3092
139.021	99.7428	137.444	99.2301	138.302	99.5206	137.757	98.3053
139.109	99.7418	137.526	99.228	138.386	99.5197	137.841	98.3015
139.199	99.7412	137.609	99.2256	138.472	99.5187	137.925	98.2976
139.288	99.7405	137.694	99.2232	138.558	99.5178	138.009	98.2936
139.374	99.7398	137.778	99.2208	138.641	99.5169	138.093	98.2897
139.458	99.739	137.862	99.2184	138.725	99.5159	138.178	98.2858
139.542	99.7384	137.945	99.216	138.811	99.515	138.262	98.2819
139.624	99.738	138.028	99.2137	138.898	99.514	138.346	98.2779
139.706	99.7373	138.111	99.2113	138.985	99.5131	138.428	98.274
139.79	99.7364	138.196	99.209	139.071	99.5122	138.513	98.27
139.875	99.7356	138.28	99.2066	139.156	99.5113	138.599	98.2661
139.957	99.7349	138.364	99.2042	139.241	99.5103	138.684	98.2621
140.04	99.7342	138.447	99.202	139.325	99.5094	138.77	98.2581
140.123	99.7334	138.528	99.1996	139.407	99.5085	138.852	98.2541
140.208	99.7322	138.611	99.1974	139.49	99.5076	138.935	98.2501
140.294	99.7309	138.695	99.1949	139.573	99.5066	139.021	98.2461
140.381	99.7294	138.779	99.1925	139.656	99.5057	139.106	98.2421
140.47	99.7279	138.864	99.19	139.739	99.5048	139.191	98.2381
140.559	99.7266	138.949	99.1876	139.822	99.5039	139.276	98.234
140.645	99.7243	139.034	99.1851	139.905	99.503	139.36	98.23
140.731	99.7229	139.121	99.183	139.99	99.5021	139.445	98.226
140.814	99.7211	139.209	99.1808	140.074	99.5012	139.529	98.2219
140.896	99.7197	139.299	99.1784	140.157	99.5003	139.61	98.2178
140.977	99.7184	139.389	99.1761	140.242	99.4994	139.693	98.2138
141.059	99.7166	139.479	99.1739	140.327	99.4985	139.777	98.2097
141.144	99.7145	139.568	99.1716	140.411	99.4976	139.861	98.2056
141.228	99.7125	139.656	99.1691	140.496	99.4967	139.947	98.2015
141.312	99.7104	139.742	99.1665	140.581	99.4958	140.034	98.1974
141.397	99.7082	139.829	99.1642	140.666	99.4949	140.121	98.1933
141.484	99.7063	139.916	99.1616	140.75	99.494	140.208	98.1891
141.57	99.704	140.004	99.1594	140.833	99.4932	140.293	98.185
141.656	99.702	140.089	99.1569	140.917	99.4923	140.379	98.1809
141.743	99.6999	140.175	99.1542	141.002	99.4914	140.466	98.1767
141.829	99.6979	140.261	99.1519	141.087	99.4905	140.553	98.1726
141.915	99.6954	140.347	99.1496	141.171	99.4896	140.639	98.1684
141.999	99.6929	140.434	99.1471	141.257	99.4888	140.723	98.1642
142.083	99.6903	140.52	99.145	141.344	99.4879	140.807	98.1601
142.167	99.6868	140.605	99.1426	141.43	99.487	140.891	98.1559
142.252	99.6836	140.687	99.1403	141.517	99.4861	140.973	98.1517
142.336	99.6806	140.77	99.1377	141.602	99.4853	141.055	98.1475
142.42	99.6777	140.851	99.1351	141.687	99.4844	141.136	98.1432
142.503	99.6744	140.933	99.1328	141.77	99.4836	141.218	98.139
142.587	99.6707	141.015	99.1301	141.851	99.4827	141.301	98.1348
142.671	99.6675	141.096	99.1277	141.932	99.4818	141.386	98.1305
142.755	99.6638	141.178	99.1252	142.013	99.481	141.47	98.1263
142.839	99.6597	141.258	99.1228	142.093	99.4801	141.555	98.1221
142.922	99.6557	141.34	99.1205	142.174	99.4793	141.64	98.1178
143.006	99.6517	141.425	99.1181	142.256	99.4784	141.724	98.1135
143.089	99.6471	141.512	99.1156	142.34	99.4776	141.808	98.1092
143.172	99.6432	141.598	99.1132	142.424	99.4767	141.894	98.1049
143.255	99.6392	141.684	99.1107	142.51	99.4759	141.982	98.1006
143.341	99.635	141.77	99.1083	142.597	99.475	142.069	98.0963
143.429	99.6309	141.855	99.1055	142.685	99.4742	142.154	98.092
143.52	99.6265	141.941	99.1031	142.773	99.4734	142.237	98.0877
143.609	99.622	142.026	99.1005	142.861	99.4725	142.319	98.0834
143.697	99.618	142.111	99.0977	142.949	99.4717	142.402	98.079
143.785	99.6152	142.197	99.095	143.036	99.4709	142.484	98.0747
143.873	99.6145	142.282	99.0925	143.122	99.4701	142.566	98.0703
143.962	99.6158	142.366	99.0899	143.207	99.4692	142.649	98.066
144.051	99.6182	142.45	99.0874	143.293	99.4684	142.731	98.0616
144.139	99.6218	142.535	99.0849	143.378	99.4676	142.815	98.0572
144.225	99.6262	142.619	99.0825	143.464	99.4668	142.898	98.0528
144.311	99.6315	142.703	99.0802	143.55	99.466	142.983	98.0484
144.394	99.6372	142.787	99.0779	143.635	99.4651	143.067	98.044
144.478	99.6434	142.872	99.0755	143.72	99.4643	143.152	98.0396
144.561	99.65	142.957	99.0731	143.805	99.4635	143.235	98.0351
144.647	99.6573	143.042	99.0706	143.89	99.4627	143.319	98.0307
144.734	99.665	143.127	99.068	143.971	99.462	143.403	98.0263
144.82	99.673	143.212	99.0657	144.052	99.4612	143.486	98.0218
144.904	99.681	143.297	99.0632	144.132	99.4604	143.569	98.0173
144.989	99.6904	143.381	99.0614	144.214	99.4596	143.651	98.0129
145.074	99.7	143.467	99.0593	144.296	99.4588	143.733	98.0084
145.159	99.7104	143.552	99.057	144.379	99.458	143.815	98.0039
145.244	99.7211	143.638	99.055	144.462	99.4572	143.898	97.9994
145.328	99.7328	143.723	99.0532	144.548	99.4565	143.981	97.9949
145.414	99.7447	143.809	99.0514	144.634	99.4557	144.065	97.9904
145.5	99.7571	143.894	99.0498	144.719	99.4549	144.15	97.9859
145.584	99.7698	143.979	99.0479	144.805	99.4542	144.234	97.9813
145.669	99.783	144.065	99.0469	144.89	99.4534	144.318	97.9768
145.754	99.7962	144.15	99.0457	144.975	99.4526	144.403	97.9723
145.84	99.8097	144.236	99.0446	145.061	99.4519	144.489	97.9677
145.925	99.823	144.32	99.0435	145.147	99.4511	144.575	97.9631
146.011	99.8358	144.405	99.0426	145.232	99.4504	144.661	97.9586
146.098	99.8491	144.49	99.0416	145.317	99.4496	144.749	97.954
146.183	99.8624	144.576	99.0411	145.4	99.4489	144.837	97.9494
146.267	99.8755	144.661	99.0406	145.484	99.4481	144.924	97.9448
146.348	99.8879	144.746	99.0406	145.569	99.4474	145.011	97.9402
146.43	99.8975	144.831	99.0403	145.658	99.4467	145.097	97.9356
146.51	99.9059	144.916	99.0403	145.748	99.4459	145.186	97.931
146.592	99.9128	145.002	99.0402	145.838	99.4452	145.276	97.9264
146.675	99.9183	145.088	99.0402	145.926	99.4445	145.363	97.9218
146.759	99.9236	145.174	99.0404	146.014	99.4437	145.45	97.9171
146.841	99.928	145.26	99.0405	146.102	99.443	145.535	97.9125
146.923	99.9317	145.345	99.0406	146.19	99.4423	145.62	97.9078
147.006	99.9341	145.431	99.0408	146.277	99.4416	145.704	97.9032
147.092	99.9369	145.519	99.0409	146.363	99.4408	145.789	97.8985
147.179	99.9394	145.606	99.0414	146.447	99.4401	145.873	97.8938
147.266	99.942	145.693	99.042	146.528	99.4394	145.956	97.8891
147.353	99.9441	145.778	99.0425	146.609	99.4387	146.038	97.8845
147.439	99.9467	145.863	99.0428	146.69	99.438	146.119	97.8798
147.525	99.9477	145.947	99.0435	146.771	99.4373	146.201	97.8751
147.612	99.9488	146.031	99.0438	146.853	99.4366	146.283	97.8703
147.701	99.9493	146.117	99.0441	146.935	99.4359	146.367	97.8656
147.789	99.9493	146.204	99.0447	147.017	99.4352	146.449	97.8609
147.877	99.949	146.29	99.0455	147.099	99.4344	146.533	97.8561
147.964	99.9481	146.373	99.0464	147.183	99.4338	146.618	97.8514
148.05	99.9472	146.457	99.0466	147.268	99.433	146.702	97.8466
148.135	99.9462	146.542	99.0474	147.355	99.4323	146.788	97.8419
148.221	99.9453	146.627	99.0479	147.441	99.4317	146.875	97.8371
148.308	99.9446	146.712	99.0481	147.528	99.431	146.961	97.8323
148.394	99.9439	146.798	99.0478	147.613	99.4303	147.045	97.8275
148.478	99.9435	146.883	99.0479	147.697	99.4296	147.129	97.8227
148.56	99.9439	146.967	99.0486	147.778	99.4289	147.214	97.8179
148.642	99.9447	147.05	99.0493	147.86	99.4282	147.3	97.8131
148.724	99.946	147.133	99.049	147.942	99.4275	147.386	97.8083
148.805	99.9479	147.216	99.0487	148.024	99.4268	147.471	97.8034
148.888	99.9503	147.301	99.0487	148.105	99.4261	147.558	97.7986
148.972	99.9531	147.385	99.0487	148.187	99.4254	147.643	97.7937
149.057	99.9561	147.47	99.0487	148.27	99.4248	147.727	97.7889
149.142	99.959	147.557	99.0485	148.352	99.4241	147.811	97.784
149.226	99.9627	147.644	99.0483	148.435	99.4234	147.897	97.7791
149.31	99.966	147.734	99.0481	148.517	99.4227	147.984	97.7742
149.394	99.9694	147.823	99.0472	148.6	99.422	148.07	97.7693
149.478	99.9727	147.913	99.0466	148.684	99.4214	148.157	97.7644
149.564	99.9763	148.001	99.0456	148.767	99.4207	148.245	97.7595
149.649	99.9794	148.089	99.045	148.851	99.42	148.331	97.7545
149.734	99.9835	148.176	99.0444	148.934	99.4193	148.417	97.7496
149.819	99.9873	148.262	99.0437	149.019	99.4187	148.504	97.7446
149.903	99.9913	148.346	99.0429	149.104	99.418	148.593	97.7397
149.985	99.9949	148.43	99.0421	149.188	99.4173	148.68	97.7347
150.069	99.9987	148.512	99.0411	149.275	99.4167	148.767	97.7297
150.157	100.002	148.593	99.0403	149.364	99.416	148.851	97.7247
150.244	100.007	148.674	99.0397	149.453	99.4154	148.934	97.7197
150.33	100.011	148.754	99.0391	149.541	99.4147	149.015	97.7147
150.415	100.015	148.835	99.0383	149.63	99.4141	149.093	97.7097
150.499	100.019	148.918	99.037	149.719	99.4134	149.173	97.7047
150.583	100.023	149	99.0359	149.808	99.4128	149.254	97.6996
150.668	100.027	149.082	99.0347	149.894	99.4121	149.336	97.6946
150.753	100.031	149.166	99.0339	149.98	99.4115	149.419	97.6895
150.839	100.035	149.25	99.0329	150.065	99.4108	149.504	97.6844
150.926	100.038	149.334	99.0324	150.15	99.4102	149.59	97.6793
151.01	100.041	149.417	99.0314	150.234	99.4095	149.679	97.6742
151.094	100.044	149.502	99.0298	150.319	99.4089	149.768	97.6691
151.178	100.046	149.589	99.028	150.403	99.4083	149.859	97.664
151.265	100.047	149.676	99.0274	150.488	99.4077	149.95	97.6589
151.353	100.049	149.762	99.0262	150.574	99.407	150.04	97.6538
151.44	100.049	149.849	99.0254	150.659	99.4064	150.129	97.6486
151.528	100.05	149.936	99.0239	150.742	99.4058	150.218	97.6435
151.617	100.05	150.021	99.0225	150.824	99.4052	150.304	97.6383
151.704	100.05	150.107	99.0214	150.905	99.4046	150.39	97.6331
151.789	100.05	150.193	99.0202	150.985	99.4039	150.474	97.6279
151.875	100.05	150.279	99.0189	151.067	99.4033	150.556	97.6227
151.962	100.049	150.363	99.0176	151.15	99.4027	150.637	97.6175
152.049	100.048	150.446	99.0162	151.234	99.4021	150.72	97.6123
152.137	100.047	150.529	99.0153	151.319	99.4015	150.802	97.6071
152.222	100.047	150.612	99.0146	151.404	99.4009	150.885	97.6018
152.308	100.046	150.695	99.0136	151.491	99.4003	150.968	97.5965
152.392	100.046	150.779	99.0125	151.578	99.3997	151.051	97.5913
152.476	100.045	150.864	99.0112	151.667	99.3991	151.134	97.586
152.561	100.044	150.95	99.01	151.757	99.3986	151.219	97.5807
152.644	100.043	151.038	99.0087	151.844	99.398	151.305	97.5754
152.728	100.042	151.125	99.0079	151.93	99.3974	151.393	97.5701
152.812	100.042	151.213	99.0067	152.015	99.3968	151.481	97.5648
152.895	100.04	151.301	99.0052	152.1	99.3962	151.57	97.5594
152.979	100.04	151.389	99.0035	152.185	99.3956	151.658	97.5541
153.063	100.038	151.478	99.002	152.271	99.3951	151.745	97.5487
153.148	100.037	151.566	99.0008	152.357	99.3945	151.833	97.5434
153.232	100.037	151.655	98.9993	152.442	99.3939	151.92	97.538
153.317	100.036	151.742	98.9977	152.526	99.3933	152.008	97.5326
153.403	100.035	151.827	98.9961	152.611	99.3928	152.095	97.5272
153.492	100.034	151.911	98.9947	152.698	99.3922	152.18	97.5218
153.58	100.034	151.996	98.9932	152.786	99.3917	152.265	97.5164
153.668	100.033	152.082	98.9915	152.872	99.3911	152.351	97.5109
153.758	100.033	152.168	98.9899	152.957	99.3906	152.436	97.5054
153.848	100.032	152.255	98.9877	153.041	99.39	152.521	97.5
153.939	100.032	152.341	98.9859	153.125	99.3894	152.609	97.4945
154.028	100.031	152.429	98.9838	153.21	99.3889	152.698	97.489
154.118	100.03	152.516	98.9824	153.294	99.3884	152.787	97.4835
154.208	100.03	152.602	98.9809	153.379	99.3878	152.877	97.478
154.296	100.029	152.69	98.9794	153.464	99.3873	152.967	97.4725
154.383	100.029	152.777	98.9777	153.55	99.3867	153.058	97.4669
154.47	100.028	152.865	98.9758	153.636	99.3862	153.149	97.4614
154.557	100.028	152.952	98.9743	153.725	99.3857	153.239	97.4558
154.643	100.027	153.037	98.9724	153.816	99.3851	153.33	97.4502
154.729	100.027	153.124	98.9705	153.908	99.3846	153.422	97.4446
154.813	100.027	153.211	98.9684	153.998	99.3841	153.512	97.439
154.9	100.027	153.298	98.9663	154.085	99.3835	153.601	97.4334
154.989	100.027	153.383	98.9645	154.173	99.383	153.691	97.4278
155.08	100.026	153.469	98.9625	154.262	99.3825	153.781	97.4221
155.168	100.026	153.555	98.9607	154.351	99.382	153.87	97.4164
155.257	100.026	153.644	98.9591	154.44	99.3814	153.958	97.4108
155.343	100.026	153.733	98.9572	154.528	99.3809	154.046	97.4051
155.426	100.025	153.821	98.9553	154.617	99.3804	154.135	97.3994
155.509	100.025	153.911	98.9533	154.705	99.3799	154.225	97.3937
155.592	100.024	154.001	98.9512	154.794	99.3793	154.313	97.388
155.677	100.024	154.09	98.9493	154.883	99.3788	154.401	97.3822
155.764	100.024	154.179	98.9474	154.972	99.3783	154.491	97.3765
155.85	100.023	154.269	98.9454	155.062	99.3778	154.578	97.3707
155.934	100.023	154.36	98.9437	155.152	99.3773	154.661	97.3649
156.018	100.022	154.451	98.9423	155.24	99.3768	154.745	97.3591
156.101	100.022	154.541	98.9407	155.327	99.3762	154.828	97.3533
156.187	100.021	154.63	98.9395	155.414	99.3757	154.913	97.3475
156.276	100.021	154.721	98.9373	155.502	99.3752	154.997	97.3416
156.366	100.021	154.811	98.9348	155.59	99.3747	155.082	97.3358
156.455	100.02	154.899	98.933	155.677	99.3742	155.167	97.3299
156.544	100.02	154.987	98.9311	155.766	99.3736	155.255	97.324
156.631	100.02	155.074	98.9296	155.856	99.3731	155.342	97.3181
156.716	100.02	155.161	98.9276	155.946	99.3726	155.43	97.3122
156.801	100.02	155.249	98.9259	156.035	99.3721	155.519	97.3062
156.888	100.019	155.339	98.9245	156.126	99.3715	155.608	97.3003
156.977	100.019	155.43	98.9227	156.218	99.371	155.696	97.2943
157.065	100.018	155.521	98.9204	156.309	99.3705	155.783	97.2883
157.154	100.018	155.611	98.9186	156.399	99.37	155.87	97.2823
157.242	100.018	155.699	98.9166	156.487	99.3695	155.958	97.2763
157.332	100.018	155.788	98.9145	156.573	99.3689	156.046	97.2703
157.42	100.017	155.877	98.9126	156.657	99.3684	156.133	97.2642
157.509	100.017	155.965	98.9107	156.741	99.3679	156.221	97.2582
157.596	100.017	156.053	98.9086	156.826	99.3673	156.309	97.2521
157.683	100.016	156.14	98.9065	156.913	99.3668	156.399	97.246
157.769	100.016	156.226	98.9044	156.999	99.3662	156.488	97.2399
157.854	100.016	156.311	98.9025	157.086	99.3657	156.579	97.2337
157.938	100.016	156.397	98.9006	157.175	99.3652	156.671	97.2276
158.023	100.016	156.482	98.8986	157.266	99.3646	156.762	97.2214
158.11	100.016	156.571	98.8966	157.356	99.3641	156.852	97.2152
158.197	100.016	156.659	98.8945	157.446	99.3636	156.94	97.209
158.283	100.015	156.747	98.8924	157.538	99.363	157.028	97.2028
158.369	100.016	156.838	98.8906	157.63	99.3625	157.117	97.1966
158.456	100.015	156.928	98.8886	157.719	99.3619	157.203	97.1904
158.545	100.015	157.017	98.8865	157.808	99.3614	157.29	97.1841
158.633	100.016	157.105	98.884	157.895	99.3608	157.379	97.1779
158.723	100.016	157.193	98.8813	157.982	99.3603	157.467	97.1716
158.814	100.016	157.28	98.8788	158.069	99.3597	157.555	97.1653
158.904	100.016	157.367	98.8769	158.154	99.3592	157.643	97.159
158.991	100.016	157.452	98.8747	158.24	99.3586	157.732	97.1527
159.08	100.015	157.537	98.8727	158.326	99.3581	157.82	97.1464
159.168	100.015	157.623	98.8703	158.411	99.3575	157.908	97.14
159.256	100.016	157.709	98.8681	158.496	99.357	157.995	97.1337
159.345	100.016	157.793	98.8661	158.583	99.3564	158.081	97.1273
159.434	100.016	157.879	98.8641	158.671	99.3559	158.17	97.1209
159.521	100.016	157.966	98.8617	158.757	99.3553	158.258	97.1146
159.607	100.016	158.053	98.8593	158.844	99.3548	158.348	97.1082
159.695	100.016	158.14	98.857	158.931	99.3542	158.437	97.1017
159.783	100.016	158.227	98.8546	159.018	99.3537	158.526	97.0953
159.87	100.016	158.313	98.8523	159.105	99.3531	158.615	97.0888
159.954	100.015	158.398	98.8504	159.193	99.3526	158.705	97.0824
160.036	100.015	158.485	98.8481	159.284	99.352	158.796	97.0759
160.119	100.015	158.572	98.8458	159.375	99.3515	158.888	97.0694
160.203	100.015	158.66	98.8436	159.466	99.3509	158.979	97.0628
160.286	100.015	158.748	98.8416	159.555	99.3504	159.068	97.0563
160.37	100.015	158.836	98.8397	159.645	99.3498	159.156	97.0497
160.455	100.015	158.922	98.8376	159.737	99.3493	159.241	97.0431
160.539	100.014	159.008	98.8355	159.826	99.3487	159.327	97.0365
160.623	100.013	159.094	98.8332	159.913	99.3482	159.412	97.0298
160.708	100.013	159.18	98.8308	160.001	99.3476	159.498	97.0232
160.796	100.013	159.266	98.8285	160.09	99.3471	159.584	97.0165
160.887	100.012	159.351	98.8264	160.176	99.3465	159.67	97.0097
160.977	100.012	159.438	98.8243	160.263	99.3459	159.756	97.003
161.066	100.012	159.523	98.8222	160.35	99.3454	159.842	96.9962
161.153	100.012	159.608	98.8199	160.438	99.3448	159.928	96.9894
161.242	100.011	159.693	98.8175	160.525	99.3443	160.014	96.9825
161.332	100.011	159.781	98.8152	160.611	99.3437	160.102	96.9757
161.424	100.01	159.868	98.8128	160.697	99.3431	160.191	96.9688
161.513	100.009	159.956	98.8104	160.786	99.3425	160.28	96.9618
161.602	100.009	160.044	98.8081	160.876	99.342	160.367	96.9549
161.69	100.009	160.133	98.8058	160.965	99.3414	160.454	96.9479
161.777	100.009	160.223	98.8033	161.054	99.3408	160.539	96.9409
161.864	100.009	160.311	98.8009	161.14	99.3402	160.624	96.9338
161.952	100.008	160.399	98.799	161.227	99.3396	160.709	96.9268
162.039	100.008	160.488	98.797	161.313	99.3391	160.797	96.9197
162.124	100.008	160.577	98.7947	161.398	99.3385	160.887	96.9125
162.206	100.008	160.667	98.7923	161.484	99.3379	160.975	96.9053
162.287	100.007	160.757	98.7899	161.571	99.3373	161.063	96.8981
162.369	100.007	160.847	98.7874	161.659	99.3367	161.153	96.8909
162.454	100.007	160.937	98.7852	161.746	99.3361	161.242	96.8837
162.54	100.007	161.026	98.7831	161.834	99.3355	161.329	96.8764
162.625	100.006	161.115	98.7806	161.921	99.3349	161.415	96.8691
162.709	100.006	161.204	98.7782	162.009	99.3343	161.502	96.8618
162.791	100.006	161.291	98.7759	162.096	99.3337	161.59	96.8544
162.874	100.006	161.379	98.7738	162.183	99.333	161.674	96.847
162.961	100.006	161.467	98.7717	162.267	99.3324	161.759	96.8397
163.049	100.005	161.554	98.7693	162.352	99.3318	161.842	96.8322
163.136	100.005	161.639	98.7667	162.437	99.3312	161.926	96.8248
163.225	100.004	161.723	98.7641	162.523	99.3305	162.011	96.8173
163.312	100.004	161.808	98.7616	162.61	99.3299	162.097	96.8098
163.397	100.004	161.893	98.7594	162.696	99.3293	162.182	96.8023
163.482	100.004	161.979	98.7571	162.783	99.3286	162.268	96.7948
163.569	100.004	162.066	98.7546	162.869	99.328	162.353	96.7872
163.656	100.004	162.152	98.7522	162.956	99.3273	162.436	96.7797
163.746	100.004	162.24	98.7498	163.042	99.3267	162.523	96.7721
163.834	100.004	162.326	98.7477	163.131	99.326	162.61	96.7644
163.922	100.004	162.412	98.7457	163.221	99.3254	162.696	96.7568
164.01	100.004	162.498	98.7436	163.31	99.3247	162.781	96.7492
164.097	100.004	162.586	98.7416	163.399	99.3241	162.866	96.7415
164.182	100.003	162.674	98.7392	163.485	99.3234	162.949	96.7338
164.269	100.003	162.763	98.737	163.571	99.3228	163.033	96.7261
164.356	100.003	162.85	98.7349	163.656	99.3221	163.118	96.7184
164.443	100.003	162.936	98.7328	163.742	99.3214	163.204	96.7106
164.53	100.003	163.024	98.7305	163.83	99.3208	163.292	96.7028
164.616	100.002	163.11	98.7278	163.919	99.3201	163.379	96.695
164.703	100.002	163.196	98.7252	164.007	99.3194	163.464	96.6873
164.789	100.002	163.282	98.7231	164.093	99.3187	163.551	96.6794
164.874	100.003	163.37	98.721	164.179	99.3181	163.64	96.6716
164.961	100.002	163.458	98.7187	164.263	99.3174	163.729	96.6637
165.049	100.002	163.545	98.7167	164.347	99.3167	163.817	96.6559
165.136	100.001	163.631	98.714	164.43	99.316	163.904	96.648
165.222	100.002	163.716	98.7118	164.513	99.3153	163.991	96.6401
165.308	100.002	163.801	98.7094	164.598	99.3147	164.077	96.6321
165.394	100.002	163.886	98.7072	164.683	99.314	164.165	96.6242
165.479	100.002	163.973	98.7048	164.769	99.3133	164.253	96.6162
165.562	100.001	164.061	98.7021	164.856	99.3126	164.342	96.6082
165.647	100.001	164.149	98.6995	164.943	99.3119	164.429	96.6002
165.732	100.001	164.235	98.6971	165.031	99.3112	164.513	96.5922
165.816	100.001	164.322	98.6949	165.119	99.3105	164.597	96.5842
165.899	100.001	164.41	98.6929	165.209	99.3098	164.683	96.5761
165.983	100	164.499	98.6907	165.301	99.309	164.768	96.5681
166.068	100	164.588	98.6886	165.395	99.3083	164.855	96.56
166.154	99.9998	164.679	98.6862	165.486	99.3076	164.942	96.5519
166.242	99.9996	164.769	98.6839	165.574	99.3069	165.028	96.5438
166.33	99.9992	164.859	98.6816	165.659	99.3062	165.115	96.5357
166.419	99.9986	164.948	98.6792	165.744	99.3054	165.204	96.5275
166.508	99.9986	165.037	98.6767	165.832	99.3047	165.293	96.5193
166.597	99.9988	165.127	98.6742	165.92	99.304	165.383	96.5112
166.685	99.9991	165.216	98.6719	166.009	99.3033	165.473	96.5029
166.772	99.9991	165.303	98.6695	166.095	99.3025	165.562	96.4947
166.859	99.9994	165.389	98.6672	166.18	99.3018	165.651	96.4865
166.946	99.9994	165.475	98.6647	166.265	99.301	165.738	96.4782
167.032	99.9995	165.561	98.6621	166.349	99.3003	165.826	96.47
167.117	99.9992	165.647	98.6599	166.436	99.2995	165.916	96.4617
167.203	99.9992	165.733	98.6577	166.526	99.2988	166.006	96.4534
167.288	99.9985	165.818	98.6556	166.616	99.298	166.096	96.445
167.373	99.9982	165.903	98.6534	166.703	99.2973	166.184	96.4367
167.459	99.9979	165.986	98.6509	166.788	99.2965	166.272	96.4283
167.546	99.9976	166.071	98.6484	166.87	99.2957	166.359	96.4199
167.635	99.9977	166.155	98.646	166.956	99.295	166.446	96.4115
167.724	99.9973	166.241	98.6437	167.041	99.2942	166.535	96.4031
167.814	99.9973	166.327	98.6414	167.126	99.2934	166.624	96.3947
167.904	99.997	166.413	98.6394	167.211	99.2926	166.712	96.3862
167.992	99.9966	166.499	98.6371	167.297	99.2919	166.798	96.3777
168.078	99.996	166.583	98.6347	167.383	99.2911	166.878	96.3692
168.165	99.996	166.668	98.6322	167.468	99.2903	166.959	96.3607
168.253	99.9959	166.753	98.63	167.554	99.2895	167.044	96.3522
168.342	99.9956	166.838	98.6278	167.642	99.2887	167.129	96.3437
168.429	99.9955	166.925	98.6253	167.731	99.2879	167.216	96.3351
168.515	99.9954	167.011	98.6228	167.818	99.2871	167.304	96.3265
168.601	99.9954	167.097	98.6198	167.906	99.2863	167.392	96.3179
168.687	99.9951	167.184	98.6171	167.996	99.2855	167.481	96.3093
168.773	99.9948	167.272	98.6145	168.086	99.2847	167.57	96.3006
168.859	99.9951	167.36	98.6121	168.175	99.2839	167.66	96.292
168.944	99.9947	167.449	98.6098	168.264	99.2831	167.75	96.2833
169.028	99.9946	167.539	98.6071	168.352	99.2822	167.84	96.2746
169.109	99.9946	167.628	98.6046	168.44	99.2814	167.928	96.2659
169.19	99.9943	167.717	98.602	168.529	99.2806	168.016	96.2571
169.272	99.994	167.806	98.5996	168.618	99.2797	168.104	96.2484
169.357	99.9936	167.894	98.5972	168.706	99.2789	168.19	96.2396
169.441	99.9933	167.983	98.5947	168.794	99.278	168.275	96.2308
169.525	99.9925	168.072	98.5922	168.881	99.2772	168.36	96.222
169.609	99.9922	168.16	98.5895	168.966	99.2763	168.445	96.2131
169.693	99.9918	168.247	98.5869	169.05	99.2755	168.529	96.2043
169.778	99.9921	168.335	98.5842	169.133	99.2746	168.615	96.1954
169.864	99.9925	168.421	98.5815	169.218	99.2738	168.701	96.1865
169.951	99.9926	168.507	98.5784	169.304	99.2729	168.788	96.1775
170.037	99.9923	168.593	98.5759	169.388	99.272	168.874	96.1686
170.123	99.9918	168.68	98.573	169.473	99.2711	168.96	96.1596
170.209	99.9915	168.766	98.5703	169.56	99.2703	169.047	96.1507
170.295	99.9919	168.851	98.5676	169.646	99.2694	169.134	96.1416
170.382	99.9922	168.937	98.565	169.732	99.2685	169.22	96.1326
170.47	99.9922	169.023	98.5622	169.82	99.2676	169.308	96.1236
170.558	99.9924	169.109	98.5594	169.908	99.2666	169.398	96.1145
170.647	99.9926	169.195	98.5565	169.998	99.2657	169.488	96.1054
170.737	99.9925	169.281	98.5539	170.086	99.2648	169.576	96.0963
170.828	99.9924	169.369	98.5514	170.174	99.2639	169.664	96.0872
170.92	99.9926	169.456	98.5485	170.263	99.263	169.752	96.078
171.011	99.9926	169.543	98.5456	170.35	99.262	169.839	96.0688
171.101	99.9924	169.63	98.5428	170.437	99.2611	169.924	96.0597
171.189	99.9921	169.717	98.5399	170.525	99.2601	170.011	96.0504
171.277	99.9921	169.803	98.5372	170.612	99.2592	170.097	96.0412
171.363	99.9923	169.888	98.5346	170.7	99.2582	170.183	96.0319
171.447	99.9921	169.975	98.5317	170.787	99.2573	170.268	96.0226
171.532	99.9921	170.063	98.5288	170.875	99.2563	170.352	96.0133
171.616	99.9918	170.15	98.5257	170.962	99.2553	170.436	96.004
171.701	99.9914	170.237	98.5228	171.05	99.2543	170.522	95.9947
171.785	99.9911	170.323	98.5202	171.136	99.2534	170.608	95.9853
171.867	99.991	170.409	98.5177	171.223	99.2524	170.697	95.9759
171.951	99.9906	170.495	98.5148	171.31	99.2514	170.786	95.9664
172.037	99.9907	170.584	98.5116	171.394	99.2504	170.874	95.957
172.121	99.9907	170.673	98.5086	171.476	99.2494	170.963	95.9475
172.207	99.9908	170.764	98.5058	171.556	99.2484	171.051	95.938
172.294	99.9908	170.852	98.5028	171.638	99.2473	171.138	95.9285
172.382	99.991	170.938	98.4998	171.723	99.2463	171.224	95.919
172.471	99.9905	171.023	98.4966	171.808	99.2453	171.31	95.9094
172.559	99.9905	171.109	98.4934	171.893	99.2442	171.395	95.8998
172.648	99.9903	171.195	98.4904	171.977	99.2432	171.478	95.8902
172.739	99.9902	171.281	98.4874	172.061	99.2421	171.563	95.8806
172.829	99.9899	171.368	98.4847	172.147	99.2411	171.648	95.8709
172.92	99.9898	171.452	98.4818	172.235	99.24	171.733	95.8612
173.012	99.9895	171.536	98.4788	172.327	99.2389	171.819	95.8515
173.103	99.9894	171.62	98.4755	172.42	99.2378	171.905	95.8418
173.191	99.9891	171.704	98.4725	172.512	99.2368	171.991	95.832
173.278	99.9888	171.791	98.4695	172.6	99.2357	172.079	95.8222
173.365	99.9888	171.878	98.4664	172.687	99.2345	172.167	95.8124
173.452	99.9883	171.965	98.4632	172.775	99.2335	172.256	95.8026
173.539	99.9883	172.052	98.46	172.865	99.2323	172.345	95.7927
173.623	99.9885	172.139	98.4569	172.954	99.2312	172.432	95.7828
173.705	99.9881	172.227	98.4538	173.042	99.2301	172.517	95.7729
173.787	99.9878	172.315	98.4507	173.131	99.2289	172.604	95.763
173.869	99.9877	172.401	98.4476	173.218	99.2278	172.691	95.753
173.955	99.9877	172.488	98.4443	173.306	99.2267	172.777	95.743
174.04	99.9875	172.576	98.4412	173.394	99.2255	172.862	95.733
174.124	99.9871	172.665	98.438	173.482	99.2244	172.947	95.7229
174.209	99.9869	172.753	98.4348	173.569	99.2232	173.032	95.7129
174.293	99.9861	172.842	98.4319	173.654	99.222	173.118	95.7028
174.376	99.986	172.932	98.4288	173.737	99.2208	173.202	95.6926
174.461	99.9858	173.021	98.4257	173.823	99.2197	173.287	95.6825
174.546	99.9857	173.11	98.4223	173.909	99.2185	173.373	95.6723
174.632	99.9855	173.199	98.419	173.993	99.2173	173.458	95.6621
174.721	99.9851	173.289	98.4159	174.078	99.2161	173.544	95.6519
174.808	99.9848	173.379	98.4129	174.166	99.2148	173.631	95.6416
174.895	99.9843	173.469	98.4098	174.253	99.2136	173.718	95.6313
174.985	99.9835	173.558	98.4068	174.34	99.2124	173.805	95.621
175.075	99.9831	173.648	98.4035	174.427	99.2112	173.892	95.6107
175.165	99.9827	173.737	98.4006	174.515	99.2099	173.978	95.6003
175.256	99.9825	173.823	98.3975	174.603	99.2087	174.065	95.5899
175.346	99.982	173.909	98.3946	174.691	99.2074	174.153	95.5795
175.437	99.9814	173.996	98.3914	174.778	99.2062	174.241	95.569
175.527	99.9808	174.082	98.3885	174.865	99.2049	174.329	95.5585
175.614	99.9802	174.166	98.3855	174.951	99.2036	174.418	95.548
175.701	99.98	174.249	98.3825	175.036	99.2024	174.507	95.5375
175.788	99.9794	174.333	98.3794	175.121	99.2011	174.595	95.5269
175.873	99.9787	174.416	98.3762	175.206	99.1998	174.684	95.5163
175.958	99.978	174.5	98.3728	175.291	99.1985	174.773	95.5057
176.043	99.9776	174.583	98.3698	175.377	99.1972	174.86	95.495
176.128	99.9771	174.667	98.3667	175.464	99.1958	174.947	95.4843
176.213	99.9766	174.752	98.3635	175.551	99.1945	175.032	95.4736
176.299	99.9763	174.837	98.3606	175.637	99.1932	175.118	95.4629
176.388	99.9761	174.924	98.3575	175.722	99.1919	175.202	95.4521
176.478	99.9763	175.013	98.3541	175.809	99.1905	175.284	95.4413
176.568	99.9765	175.105	98.3508	175.894	99.1891	175.367	95.4304
176.657	99.976	175.197	98.3481	175.978	99.1878	175.45	95.4196
176.746	99.9757	175.286	98.3449	176.063	99.1864	175.533	95.4087
176.836	99.9754	175.375	98.3417	176.149	99.185	175.616	95.3977
176.925	99.9751	175.463	98.3386	176.235	99.1836	175.699	95.3868
177.014	99.9743	175.55	98.3353	176.323	99.1822	175.786	95.3758
177.102	99.9741	175.637	98.3318	176.41	99.1808	175.873	95.3647
177.189	99.974	175.722	98.3282	176.497	99.1794	175.957	95.3537
177.273	99.9737	175.806	98.325	176.584	99.178	176.043	95.3426
177.356	99.9735	175.889	98.3218	176.671	99.1765	176.131	95.3315
177.44	99.9733	175.97	98.3185	176.756	99.1751	176.218	95.3203
177.525	99.973	176.05	98.3151	176.841	99.1736	176.305	95.3091
177.611	99.973	176.132	98.3119	176.926	99.1722	176.392	95.2979
177.696	99.9731	176.215	98.3087	177.01	99.1707	176.479	95.2866
[truncated: 7,403 more rows]

## Sheet: Fig. S8
P-PLA-10 L/min	Upwnstream	Downstream		MRSD-PLA2-10 L/min	Upwnstream	Downstream		MRSD-PLA4-10 L/min	Upwnstream	Downstream		MRSD-PLA6-10 L/min	Upwnstream	Downstream
x-axis-Particle size (nm)	y1-axis-PM Concentration (N/cm3)	y-axis-PM Concentration (N/cm3)		x-axis-Particle size (nm)	y1-axis-PM Concentration (N/cm3)	y-axis-PM Concentration (N/cm3)		x-axis-Particle size (nm)	y1-axis-PM Concentration (N/cm3)	y-axis-PM Concentration (N/cm3)		x-axis-Particle size (nm)	y1-axis-PM Concentration (N/cm3)	y-axis-PM Concentration (N/cm3)
11.5	1572.21	193.142		11.5	2567.62	8.99045		11.5	5357.39	0		11.5	3530.59	4.353
15.4	3861.67	94.0523		15.4	4201.17	19.6623		15.4	8405.71	2.0655		15.4	8173.12	0
20.5	6004.12	87.17		20.5	5306.13	92.0759		20.5	7425.61	7.311		20.5	9216.03	6.876
27.4	10987.7	517.51		27.4	9262.31	227.352		27.4	10483.4	0		27.4	13564.8	51.376
36.5	12656.8	985.613		36.5	10439.7	354.485		36.5	10453.2	41.256		36.5	14786.1	65.469
48.7	13469.4	1244.77		48.7	10933.1	440.106		48.7	10362.2	118.754		48.7	14780.7	63.928
64.9	15224.5	1211.16		64.9	12611.5	461.465		64.9	12508.6	143.478		64.9	15410.7	66.233
86.6	17677.8	943.439		86.6	15339.8	412.546		86.6	16330.5	86.622		86.6	16950	80.554
115.5	17063.3	549.642		115.5	15791.3	293.51		115.5	16619.7	1.947		115.5	16081.4	84.787
154	11920.8	165.38		154	12267.9	143.93		154	12659.8	0		154	12245.6	65.029
205.4	4679.48	0		205.4	6343.43	19.5031		205.4	7400.39	0		205.4	7472.09	28.983
	0	0			851.173	0			3348.75	41.469			3614.55	0
	0	0			0	0			1886.58	54.168			1847.18	0
P-PLA-32 L/min	Upwnstream	Downstream		MRSD-PLA2-32 L/min	Upwnstream	Downstream		MRSD-PLA4-32 L/min	Upwnstream	Downstream		MRSD-PLA6-32 L/min	Upwnstream	Downstream
x-axis-Particle size (nm)	y1-axis-PM Concentration (N/cm3)	y-axis-PM Concentration (N/cm3)		x-axis-Particle size (nm)	y1-axis-PM Concentration (N/cm3)	y-axis-PM Concentration (N/cm3)		x-axis-Particle size (nm)	y1-axis-PM Concentration (N/cm3)	y-axis-PM Concentration (N/cm3)		x-axis-Particle size (nm)	y1-axis-PM Concentration (N/cm3)	y-axis-PM Concentration (N/cm3)
11.5	1572.21	75.1983		11.5	2567.62	109.624		11.5	4674.02	32.5584		11.5	3502.39	0
15.4	3861.67	284.111		15.4	4201.17	288.885		15.4	9927.45	36.8117		15.4	7407.48	0
20.5	6004.12	909.904		20.5	5306.13	481.395		20.5	11010.5	61.9966		20.5	8166.33	98.763
27.4	10987.7	2114.93		27.4	9262.31	1001.55		27.4	16632.3	267.138		27.4	12012.1	276.513
36.5	12656.8	2923.55		36.5	10439.7	1357.29		36.5	17117.7	566.908		36.5	12130.6	337.724
48.7	13469.4	3187.13		48.7	10933.1	1490.04		48.7	15192.6	779.997		48.7	11878.9	359.839
64.9	15224.5	2989.2		64.9	12611.5	1437.37		64.9	14550.1	786.538		64.9	13597.5	401.338
86.6	17677.8	2525.58		86.6	15339.8	1285.87		86.6	16737.3	593.8		86.6	16934.7	460.528
115.5	17063.3	1797.82		115.5	15791.3	984.293		115.5	17976.4	297.573		115.5	16749.7	424.141
154	11920.8	912.299		154	12267.9	619.091		154	15794.4	71.7163		154	12395.5	273.892
205.4	4679.48	129.795		205.4	6343.43	323.091		205.4	11034.1	0		205.4	6899.97	91.769
	0	0			851.173	142.245			5770.95	17.0396			2734.86	0
	0	0			0	69.377			2286.99	46.1666			1256.68	0
P-PLA-65 L/min	Upwnstream	Downstream		MRSD-PLA2-65 L/min	Upwnstream	Downstream		MRSD-PLA4-65 L/min	Upwnstream	Downstream		MRSD-PLA6-65 L/min	Upwnstream	Downstream
x-axis-Particle size (nm)	y1-axis-PM Concentration (N/cm3)	y-axis-PM Concentration (N/cm3)		x-axis-Particle size (nm)	y1-axis-PM Concentration (N/cm3)	y-axis-PM Concentration (N/cm3)		x-axis-Particle size (nm)	y1-axis-PM Concentration (N/cm3)	y-axis-PM Concentration (N/cm3)		x-axis-Particle size (nm)	y1-axis-PM Concentration (N/cm3)	y-axis-PM Concentration (N/cm3)
11.5	1572.21	202.905		11.5	2567.62	214.541		11.5	3279.85	32.8368		11.5	2983.42	0
15.4	3861.67	731.871		15.4	4201.17	622.126		15.4	8021.8	259.774		15.4	5655.3	62.786
20.5	6004.12	1548.03		20.5	5306.13	1059.08		20.5	9207.33	592.538		20.5	6427.43	268.724
27.4	10987.7	3119.98		27.4	9262.31	1933.44		27.4	12607.9	1320.17		27.4	10700.8	545.107
36.5	12656.8	3984.93		36.5	10439.7	2229.76		36.5	12983.1	1876.1		36.5	10366	772.621
48.7	13469.4	4303.36		48.7	10933.1	2221.33		48.7	12817.2	2079		48.7	9101.84	903.323
64.9	15224.5	4309.9		64.9	12611.5	2221.91		64.9	14043.4	1909.34		64.9	10133.6	900.167
86.6	17677.8	4113.54		86.6	15339.8	2341.13		86.6	16476.4	1515.05		86.6	13892	774.743
115.5	17063.3	3274.5		115.5	15791.3	2180.72		115.5	16494.7	951.597		115.5	12622	516.65
154	11920.8	1819.64		154	12267.9	1554.42		154	12936.3	452.524		154	7694.53	267.769
205.4	4679.48	337.257		205.4	6343.43	714.73		205.4	7700.92	185.966		205.4	3168.54	137.655
	0	0			851.173	47.586			3207.46	109.923			1135.04	99.494
	0	0			0	0			1282.89	100.172				71.12
P-PLA-85 L/min	Upwnstream	Downstream		MRSD-PLA2-85 L/min	Upwnstream	Downstream		MRSD-PLA4-85 L/min	Upwnstream	Downstream		MRSD-PLA6-85 L/min	Upwnstream	Downstream
x-axis-Particle size (nm)	y1-axis-PM Concentration (N/cm3)	y-axis-PM Concentration (N/cm3)		x-axis-Particle size (nm)	y1-axis-PM Concentration (N/cm3)	y-axis-PM Concentration (N/cm3)		x-axis-Particle size (nm)	y1-axis-PM Concentration (N/cm3)	y-axis-PM Concentration (N/cm3)		x-axis-Particle size (nm)	y1-axis-PM Concentration (N/cm3)	y-axis-PM Concentration (N/cm3)
11.5	1572.21	331.34		11.5	2567.62	216.781		11.5	3679.78	0		11.5	3586.66	0
15.4	3861.67	977.792		15.4	4201.17	763.594		15.4	8189.25	423.272		15.4	10184.5	246.853
20.5	6004.12	1907.97		20.5	5306.13	1244.89		20.5	9120.03	987.426		20.5	10171.8	514.08
27.4	10987.7	3754.66		27.4	9262.31	2024.54		27.4	14081.2	1830.91		27.4	11278.9	927.714
36.5	12656.8	4636.23		36.5	10439.7	2281.24		36.5	15418.8	2135.41		36.5	11004.9	1156.2
48.7	13469.4	4857.25		48.7	10933.1	2355.1		48.7	15215.3	2233.39		48.7	11525.9	1317.73
64.9	15224.5	4806.65		64.9	12611.5	2486.65		64.9	15785.2	2343.87		64.9	13741.4	1467.57
86.6	17677.8	4641.77		86.6	15339.8	2657.06		86.6	17753.1	2464.4		86.6	16572.3	1585.57
115.5	17063.3	3731.7		115.5	15791.3	2352.72		115.5	17570.8	2122.89		115.5	13214.5	1477.14
154	11920.8	2056.46		154	12267.9	1532.29		154	14086	1255.23		154	7947.48	1068.51
205.4	4679.48	327.587		205.4	6343.43	617.216		205.4	9031.69	292.406		205.4	3318.16	516.177
	0	0			851.173	0			4412.29	0			1101.11	57.6405
	0	0			0	0			1836.83	0				0

## Sheet: Fig. S9
P-PLA-10 L/min	Upwnstream	Downstream		MRSD-PLA2-10 L/min	Upwnstream	Downstream		MRSD-PLA4-10 L/min	Upwnstream	Downstream		MRSD-PLA6-10 L/min	Upwnstream	Downstream
x-axis-Particle size (nm)	y1-axis-PM Concentration (N/cm3)	y-axis-PM Concentration (N/cm3)		x-axis-Particle size (nm)	y1-axis-PM Concentration (N/cm3)	y-axis-PM Concentration (N/cm3)		x-axis-Particle size (nm)	y1-axis-PM Concentration (N/cm3)	y-axis-PM Concentration (N/cm3)		x-axis-Particle size (nm)	y1-axis-PM Concentration (N/cm3)	y-axis-PM Concentration (N/cm3)
0.3	479203	11417.2		0.3	445007	5267		0.3	459228	5358		0.3	432952	125.05
0.37	392456	8047.7		0.37	353338	2271		0.37	409798	3872		0.37	360452	43.05
0.47	253536	4629.9		0.47	266290	787		0.47	296524	2392		0.47	233185	8.2
0.58	122160	2263.2		0.58	107505	89		0.58	155084	1094		0.58	115274	0
0.72	148610	2532.3		0.72	133997	294		0.72	211980	1274		0.72	140191	0
0.9	187593	2063.1		0.9	133015	158		0.9	250648	1078		0.9	173151	0
1.12	55082.7	591.1		1.12	31031	24		1.12	73966	278		1.12	49173.3	0
1.39	43470	411.7		1.39	25941	17		1.39	64178	250		1.39	39880.7	0
1.73	18853.1	142.6		1.73	11852	7		1.73	30706	86		1.73	16978.1	0
2.16	6083.5	34.5		2.16	4476	10		2.16	10344	20		2.16	5309.5	0
2.69	1377.7	4.6		2.69	1270	6		2.69	2402	12		2.69	1164.4	0
P-PLA-32 L/min	Upwnstream	Downstream		MRSD-PLA2-32 L/min	Upwnstream	Downstream		MRSD-PLA4-32 L/min	Upwnstream	Downstream		MRSD-PLA6-32 L/min	Upwnstream	Downstream
x-axis-Particle size (nm)	y1-axis-PM Concentration (N/cm3)	y-axis-PM Concentration (N/cm3)		x-axis-Particle size (nm)	y1-axis-PM Concentration (N/cm3)	y-axis-PM Concentration (N/cm3)		x-axis-Particle size (nm)	y1-axis-PM Concentration (N/cm3)	y-axis-PM Concentration (N/cm3)		x-axis-Particle size (nm)	y1-axis-PM Concentration (N/cm3)	y-axis-PM Concentration (N/cm3)
0.3	464634	9546		0.3	455566	22730		0.3	475001	1308		0.3	444413	375.15
0.37	394240	7084		0.37	410358	15594		0.37	385474	463.2		0.37	373215	149.65
0.47	311787	4451		0.47	295038	9452		0.47	243641	124.8		0.47	244231	32.8
0.58	146805	1427		0.58	151028	4222		0.58	117694	28.8		0.58	119369	10.25
0.72	166182	2229		0.72	203502	4826		0.72	144137	33.6		0.72	151345	8.2
0.9	160673	1940		0.9	253282	7038		0.9	176330	16.8		0.9	191349	6.15
1.12	42497	382		1.12	76492	1792		1.12	49684.8	0		1.12	55360.2	4.1
1.39	34542	319		1.39	65862	1662		1.39	40209.6	0		1.39	44093.4	2.05
1.73	15748	132		1.73	31328	836		1.73	16740	2.4		1.73	18415.2	4.1
2.16	5815	53		2.16	10368	212		2.16	5368.8	0		2.16	5881.45	0
2.69	1606	7		2.69	2660	28		2.69	1269.6	0		2.69	1408.35	0
P-PLA-65 L/min	Upwnstream	Downstream		MRSD-PLA2-65 L/min	Upwnstream	Downstream		MRSD-PLA4-65 L/min	Upwnstream	Downstream		MRSD-PLA6-65 L/min	Upwnstream	Downstream
x-axis-Particle size (nm)	y1-axis-PM Concentration (N/cm3)	y-axis-PM Concentration (N/cm3)		x-axis-Particle size (nm)	y1-axis-PM Concentration (N/cm3)	y-axis-PM Concentration (N/cm3)		x-axis-Particle size (nm)	y1-axis-PM Concentration (N/cm3)	y-axis-PM Concentration (N/cm3)		x-axis-Particle size (nm)	y1-axis-PM Concentration (N/cm3)	y-axis-PM Concentration (N/cm3)
0.3	491693	19738.2		0.3	463520	5784		0.3	480199	899.3		0.3	444534	570
0.37	425885	12764.2		0.37	422946	1718		0.37	391538	197.8		0.37	373364	166
0.47	363795	7334		0.47	310282	508		0.47	252239	55.2		0.47	248092	60
0.58	199775	3532.1		0.58	161534	150		0.58	120876	11.5		0.58	120700	20
0.72	211973	2859.5		0.72	225588	88		0.72	147294	4.6		0.72	156408	14
0.9	190957	2119.45		0.9	279984	1078		0.9	185226	73.6		0.9	201082	54
1.12	56789.1	554.8		1.12	84110	232		1.12	54625	16.1		1.12	58518	4
1.39	46747.6	453.15		1.39	71774	154		1.39	43127.3	4.6		1.39	47110	10
1.73	21492.8	211.85		1.73	35734	32		1.73	18986.5	2.3		1.73	20050	2
2.16	8020.85	68.4		2.16	11472	10		2.16	5835.1	0		2.16	6148	0
2.69	2090.95	19		2.69	2814	2		2.69	1274.2	0		2.69	1388	0
P-PLA-85 L/min	Upwnstream	Downstream		MRSD-PLA2-85 L/min	Upwnstream	Downstream		MRSD-PLA4-85 L/min	Upwnstream	Downstream		MRSD-PLA6-85 L/min	Upwnstream	Downstream
x-axis-Particle size (nm)	y1-axis-PM Concentration (N/cm3)	y-axis-PM Concentration (N/cm3)		x-axis-Particle size (nm)	y1-axis-PM Concentration (N/cm3)	y-axis-PM Concentration (N/cm3)		x-axis-Particle size (nm)	y1-axis-PM Concentration (N/cm3)	y-axis-PM Concentration (N/cm3)		x-axis-Particle size (nm)	y1-axis-PM Concentration (N/cm3)	y-axis-PM Concentration (N/cm3)
0.3	481800	26118.9		0.3	440886	2266		0.3	459913	2824.92		0.3	458052	594
0.37	408581	7342.2		0.37	370378	172		0.37	423698	206.64		0.37	396072	98
0.47	356880	1570.5		0.47	243088	20		0.47	413280	15.12		0.47	267546	12
0.58	191787	337.5		0.58	122084	0		0.58	373691	0		0.58	132722	0
0.72	211408	125.1		0.72	154862	0		0.72	138721	0		0.72	174286	0
0.9	185353	41.4		0.9	194900	170		0.9	251083	315		0.9	229770	40
1.12	56412	4.5		1.12	56286	26		1.12	111409	27.72		1.12	67166	14
1.39	48032.1	2.7		1.39	45366	8		1.39	92554.6	5.04		1.39	54840	4
1.73	22703.4	1.8		1.73	19188	0		1.73	44268.8	2.52		1.73	23570	4
2.16	7502.4	0		2.16	6076	0		2.16	14303.5	0		2.16	7304	0
2.69	1902.6	1.8		2.69	1422	0		2.69	3263.4	0		2.69	1636	0

## Sheet: Fig. S13b
x-axis	y-axis-Surface Potential (kV)	y-axis error
MRSD-PLA6	5.8	0.2
After washing	5.6	0.4
After regeneration	5.8	0.3

## Sheet: Fig. S13c
x-axis	y-axis-Capture barrier (eV)
Saturated Zn2+	0.62
Unsaturated Zn2+	0.08

[truncated: 3 more sheets: Fig. S13d, Fig. S16b, Fig. S16c]
